# Supplementary material for: SARS-CoV-2 omicron BA.5 and XBB variants have increased neurotropic potential over BA.1 in K18-hACE2 mice and human brain organoids
Source: Front Microbiol. 2023 Nov 23;14:1320856. doi: 10.3389/fmicb.2023.1320856 (PMC10706942; doi:10.3389/fmicb.2023.1320856)
Supplement: Supplementary file 3 [file Table_2.XLSX]

## Sheet: BA.5vsUV_All genes
ensembl_ID	gene_ID	logFC	logCPM	F	PValue	FDR	BrainBA5day5	BrainBA5day6	BrainBA5day6	BrainBA5day6	BrainBA5day6	BrainBA5day7	BrainUVcontol1	BrainUVcontol2	BrainUVcontol3	BrainUVcontol4	BrainUVcontol5
ENSMUSG00000000001.5	Gnai3	0.357531	4.67061	2.46367	0.138256	0.401849	320	215	320	790	385	364	236	289	158	305	175
ENSMUSG00000000028.16	Cdc45	0.378575	0.473761	1.10281	0.31099	0.575982	13	16	23	17	16	22	10	14	4	18	13
ENSMUSG00000000031.17	H19	0.626254	0.797379	1.00281	0.333195	0.594641	2	5	11	58	44	57	8	11	16	4	25
ENSMUSG00000000037.18	Scml2	-0.265819	-0.81816	0.137456	0.716231	0.862222	5	0	0	18	6	6	9	3	2	4	6
ENSMUSG00000000049.12	Apoh	-1.35581	-0.989496	4.37829	0.0545999	0.27568	2	3	5	2	1	3	7	4	7	8	1
ENSMUSG00000000056.8	Narf	0.131598	5.56385	0.389858	0.54216	0.75464	588	472	692	876	760	513	334	730	235	567	703
ENSMUSG00000000058.7	Cav2	0.038125	4.36082	0.0203679	0.888496	0.953075	252	222	270	393	230	267	228	196	177	277	150
ENSMUSG00000000078.8	Klf6	1.39847	4.86614	12.8791	0.00285467	0.0949057	271	111	364	1131	671	1200	78	224	72	263	253
ENSMUSG00000000085.17	Scmh1	0.0439475	4.75648	0.0304945	0.863809	0.94108	234	150	235	719	525	563	226	369	118	269	556
ENSMUSG00000000088.8	Cox5a	-0.687406	7.27024	3.32536	0.0890814	0.337488	1974	1720	1634	1143	1052	1093	2128	2643	1808	2055	1366
ENSMUSG00000000093.7	Tbx2	0.154851	1.5839	0.236225	0.634273	0.812646	18	34	25	54	36	81	25	28	19	28	47
ENSMUSG00000000094.13	Tbx4	-0.375456	-1.41687	0.358829	0.558482	0.765419	0	1	2	8	3	3	2	1	1	4	6
ENSMUSG00000000120.7	Ngfr	-0.622205	1.81635	3.21582	0.0939939	0.344903	30	24	29	45	44	49	34	61	18	19	116
ENSMUSG00000000125.6	Wnt3	-0.126579	3.21677	0.230087	0.638677	0.815101	62	118	121	122	96	166	86	130	73	96	139
ENSMUSG00000000126.12	Wnt9a	-0.925623	3.05762	11.6512	0.00406226	0.110102	97	47	79	74	94	60	82	164	60	122	206
ENSMUSG00000000127.16	Fer	0.427356	3.04771	2.61215	0.127781	0.388706	116	56	98	206	153	148	40	123	36	119	69
ENSMUSG00000000131.16	Xpo6	0.270423	6.03276	1.09135	0.313427	0.578372	590	386	743	1692	1240	1579	524	706	280	529	1371
ENSMUSG00000000134.18	Tfe3	-0.162942	5.16402	0.564789	0.464467	0.697529	284	277	384	645	483	772	335	476	250	303	775
ENSMUSG00000000142.16	Axin2	-0.0320173	4.15946	0.00944061	0.923939	0.968082	136	81	158	474	380	351	149	238	61	150	476
ENSMUSG00000000148.18	Brat1	-0.19713	4.33208	1.28737	0.275104	0.543899	204	152	225	395	281	299	187	268	129	221	409
ENSMUSG00000000149.11	Gna12	-0.767403	6.84587	10.8779	0.00512271	0.11958	1115	1079	1112	1147	1190	972	1419	2011	1033	1533	2142
ENSMUSG00000000154.17	Slc22a18	0.470109	0.196115	1.67948	0.21542	0.489701	16	12	18	13	13	15	10	11	4	8	12
ENSMUSG00000000157.17	Itgb2l	0.584563	-2.26142	0.312721	0.584625	0.782357	1	0	0	1	3	0	1	0	0	0	1
ENSMUSG00000000159.17	Igsf5	-1.17491	-0.89513	3.61449	0.0775207	0.320222	5	2	1	3	1	8	2	6	10	6	5
ENSMUSG00000000167.15	Pih1d2	-0.19007	0.483991	0.346047	0.56549	0.769871	13	10	11	17	18	27	11	15	12	20	13
ENSMUSG00000000168.11	Dlat	0.0580807	6.14739	0.0691775	0.796271	0.905444	989	691	1025	1068	904	931	561	965	508	983	744
ENSMUSG00000000171.6	Sdhd	-0.319937	6.62996	0.751957	0.400104	0.648946	1439	1164	1343	969	803	698	689	1752	968	1682	870
ENSMUSG00000000182.10	Fgf23	0.912902	-1.07605	1.86525	0.193014	0.465376	4	1	2	11	5	12	0	3	0	4	5
ENSMUSG00000000184.13	Ccnd2	0.574103	5.54642	3.21423	0.094068	0.345121	375	208	420	1913	1209	1016	272	655	173	460	569
ENSMUSG00000000194.14	Gpr107	-0.0470669	5.54408	0.0421604	0.840194	0.929647	361	328	449	1090	876	875	409	552	269	415	1070
ENSMUSG00000000197.9	Nalcn	0.348465	5.76113	3.12188	0.0984685	0.350669	694	329	626	1465	1121	942	356	638	280	641	738
ENSMUSG00000000202.10	Btbd17	-1.57662	5.13675	13.2803	0.00255362	0.088453	278	322	258	158	140	118	620	646	542	537	456
ENSMUSG00000000204.17	Slfn4	8.95905	3.66281	38.9002	1.93134e-05	0.00653239	25	3	70	995	555	712	0	2	0	0	0
ENSMUSG00000000214.12	Th	-0.552558	4.2987	2.88607	0.110884	0.367638	156	288	164	204	234	143	274	232	173	208	385
ENSMUSG00000000215.12	Ins2	-2.39134	-1.85436	8.10631	0.0126543	0.166205	1	0	0	1	0	1	3	7	0	2	1
ENSMUSG00000000216.9	Scnn1g	0.513996	-0.897789	0.700128	0.416437	0.661154	1	0	4	16	10	9	3	3	3	3	4
ENSMUSG00000000223.14	Drp2	-0.0876575	5.6119	0.12366	0.730201	0.869734	494	282	513	1189	942	682	344	783	205	532	1137
ENSMUSG00000000244.18	Tspan32	0.482458	-1.23064	0.583121	0.457445	0.692415	4	3	3	5	1	9	2	4	2	0	4
ENSMUSG00000000247.12	Lhx2	-0.45965	4.69569	5.14644	0.0391917	0.244665	275	216	287	390	350	231	306	483	178	333	378
ENSMUSG00000000248.17	Clec2g	0.787149	-2.21397	0.555567	0.468068	0.700703	0	1	0	2	3	0	0	0	1	0	1
ENSMUSG00000000253.14	Gmpr	-0.402632	5.32742	1.23799	0.284124	0.552485	523	531	518	313	306	275	426	647	390	524	468
ENSMUSG00000000263.16	Glra1	-0.0283179	1.39997	0.00137129	0.97097	0.988769	11	6	11	62	52	87	18	6	8	2	121
ENSMUSG00000000266.12	Mid2	0.757904	4.18362	13.5842	0.00234975	0.0848157	227	122	255	531	379	398	113	160	69	167	231
ENSMUSG00000000275.17	Trim25	2.84453	4.73045	16.4883	0.00111163	0.0551229	91	44	156	1630	1148	1302	47	101	20	42	151
ENSMUSG00000000276.12	Dgke	0.213081	5.9819	1.17325	0.296573	0.563435	712	372	727	1442	1193	1338	497	800	344	597	1048
ENSMUSG00000000278.11	Scpep1	0.038745	3.62856	0.0324037	0.859658	0.939426	107	86	143	223	190	296	121	172	66	120	197
ENSMUSG00000000282.13	Mnt	0.219034	4.80124	0.377596	0.548498	0.759335	161	146	261	873	489	792	259	282	106	184	655
ENSMUSG00000000290.14	Itgb2	1.24022	2.64093	7.85754	0.0138127	0.169999	41	23	63	164	116	346	30	51	23	36	53
ENSMUSG00000000295.14	Hddc2	0.0418028	3.51514	0.00754187	0.931994	0.971037	166	200	162	100	73	94	53	173	135	150	62
ENSMUSG00000000296.9	Tpd52l1	-0.305264	4.29223	0.882368	0.363074	0.618967	272	226	248	233	171	149	203	335	182	266	163
ENSMUSG00000000301.17	Pemt	-0.680224	0.92855	1.9562	0.183128	0.454967	19	24	21	10	11	14	10	34	23	36	15
ENSMUSG00000000303.13	Cdh1	0.919472	1.16648	1.86998	0.192484	0.464715	4	8	18	79	52	88	16	15	2	3	47
ENSMUSG00000000305.13	Cdh4	-0.420635	4.28556	2.14468	0.164595	0.432927	126	137	127	390	365	310	202	217	131	164	575
ENSMUSG00000000308.15	Ckmt1	-0.478055	7.70179	2.45321	0.139033	0.402754	2723	2307	2483	1976	1767	1641	2523	3474	1805	2597	2871
ENSMUSG00000000317.12	Bcl6b	0.441279	1.48301	1.1797	0.295299	0.562421	12	20	30	76	54	73	21	46	4	29	28
ENSMUSG00000000318.17	Clec10a	-0.702552	-0.558512	1.72691	0.209394	0.483573	7	7	5	5	2	5	6	11	8	2	9
ENSMUSG00000000320.11	Alox12	-1.81821	-0.304153	15.1714	0.00154537	0.0676573	5	4	1	2	5	7	11	13	5	11	22
ENSMUSG00000000326.14	Comt	-0.50944	5.87217	5.72736	0.0308656	0.22526	671	499	645	719	594	683	585	1192	410	866	860
ENSMUSG00000000339.15	Rtca	0.111994	5.30185	0.0973221	0.759547	0.885794	628	485	657	458	322	436	231	609	309	614	270
ENSMUSG00000000340.11	Dbt	1.30352	3.16148	9.15749	0.00884933	0.147132	95	20	117	430	231	241	26	78	18	74	91
ENSMUSG00000000346.10	Dazap2	-0.0844796	7.1559	0.166876	0.688925	0.846167	1736	1380	1914	2294	1571	2027	1311	2281	932	1895	1700
ENSMUSG00000000355.14	Mcts1	-0.41269	4.72065	0.978562	0.338917	0.599719	390	322	292	303	197	149	268	302	374	378	173
ENSMUSG00000000359.4	Rem1	-0.36308	-0.265976	0.803758	0.384744	0.636394	3	5	9	7	12	13	10	11	3	7	12
ENSMUSG00000000365.10	Rnf17	-0.132398	-0.875925	0.0714224	0.793074	0.903728	9	2	4	8	3	4	1	6	3	6	7
ENSMUSG00000000374.9	Trappc10	-0.0902874	6.49067	0.212977	0.651352	0.822416	941	684	980	1696	1338	1620	864	1201	507	826	1904
ENSMUSG00000000378.16	Ccm2	-1.04365	6.2041	5.99691	0.0277149	0.218018	676	866	657	496	439	350	957	1241	1243	998	643
ENSMUSG00000000384.16	Tbrg4	-0.260849	4.63954	2.12902	0.166042	0.434842	213	224	287	440	326	364	270	321	196	250	456
ENSMUSG00000000385.9	Tmprss2	2.84281	0.769252	10.3778	0.00597762	0.126502	2	7	7	176	57	10	5	3	1	6	3
ENSMUSG00000000386.17	Mx1	7.55648	6.08372	43.6609	1.03093e-05	0.00534278	146	33	513	5094	2730	4204	2	24	2	2	8
ENSMUSG00000000392.18	Fap	0.971671	0.712475	5.23896	0.0377046	0.241013	25	10	17	78	21	18	9	12	5	19	7
ENSMUSG00000000394.16	Gcg	2.02264	-1.61108	4.54379	0.050752	0.268813	1	0	1	18	2	2	0	1	0	1	1
ENSMUSG00000000399.11	Ndufa9	-0.476187	6.89245	1.37537	0.259964	0.529451	1522	1600	1467	965	741	774	1263	1998	1321	1757	945
ENSMUSG00000000402.3	Egfl6	0.412437	-0.298012	0.534989	0.476274	0.706211	6	2	8	22	13	14	2	8	2	1	20
ENSMUSG00000000409.15	Lck	1.12518	1.72571	6.55903	0.0222719	0.201443	10	28	39	77	56	157	15	28	15	21	25
ENSMUSG00000000411.8	Tssk3	0.551279	-1.87807	0.314444	0.583603	0.781646	0	0	0	5	3	4	0	4	0	1	0
ENSMUSG00000000416.17	Cttnbp2	0.461357	5.68574	2.58532	0.1296	0.391659	531	243	599	1765	1522	623	324	582	247	555	703
ENSMUSG00000000420.16	Galnt1	0.149425	5.75786	0.487316	0.496267	0.721459	720	592	767	954	634	760	466	754	354	677	516
ENSMUSG00000000439.10	Mkrn2	-0.183732	5.89	0.845104	0.373113	0.627961	680	579	767	875	697	766	489	956	500	747	763
ENSMUSG00000000440.13	Pparg	0.40982	1.01935	1.7823	0.20263	0.476371	24	15	24	59	25	32	11	32	6	17	26
ENSMUSG00000000441.18	Raf1	-0.105035	6.09988	0.446469	0.514605	0.735052	690	581	836	1288	1042	987	582	1021	456	858	1060
ENSMUSG00000000486.14	Septin1	0.159959	1.27091	0.289874	0.598541	0.790111	24	24	25	36	27	56	22	36	13	16	31
ENSMUSG00000000489.8	Pdgfb	-0.211273	4.09905	1.20329	0.290705	0.558596	174	117	165	360	257	268	194	280	87	175	305
ENSMUSG00000000530.17	Acvrl1	-0.446576	4.32656	3.02042	0.103593	0.358114	130	141	148	329	239	474	262	257	207	224	266
ENSMUSG00000000531.6	Tamalin	-0.148688	4.03216	0.652378	0.43243	0.672695	181	116	179	302	233	270	114	279	104	190	294
ENSMUSG00000000532.12	Acvr1b	0.129077	6.23294	0.198341	0.662698	0.830058	694	415	806	1767	1619	1532	616	819	296	597	1896
ENSMUSG00000000538.19	Tom1l2	-0.418496	7.95533	3.0204	0.103594	0.358114	2124	1675	2265	4572	4051	3468	2967	2898	1833	2027	6407
ENSMUSG00000000552.11	Zfp385a	-0.424196	5.97346	3.10503	0.099298	0.352131	479	419	573	1076	851	1197	831	747	408	548	1550
ENSMUSG00000000555.9	Itga5	1.21351	2.84999	4.66396	0.0481571	0.264568	34	14	57	226	128	444	32	74	18	37	77
ENSMUSG00000000560.10	Gabra2	0.523335	3.9758	1.12212	0.306941	0.572377	76	90	46	915	450	224	111	123	92	100	275
ENSMUSG00000000561.15	Wdr77	0.013284	5.41175	0.00641325	0.937276	0.972537	522	316	506	846	676	656	339	637	247	481	689
ENSMUSG00000000562.6	Adora3	1.18303	-0.026109	5.03682	0.0410434	0.249316	20	12	11	18	8	17	2	13	6	3	2
ENSMUSG00000000563.18	Atp5pb	-0.361625	8.0064	0.698785	0.416874	0.661483	3809	3125	3440	2423	1685	1736	2441	3850	2900	4415	1365
ENSMUSG00000000567.6	Sox9	0.282609	4.65133	0.567182	0.46354	0.696626	123	120	189	754	518	824	229	260	96	208	494
ENSMUSG00000000568.16	Hnrnpd	0.358951	6.21414	1.95246	0.183522	0.455211	670	384	754	2228	1397	1987	557	823	380	628	1256
ENSMUSG00000000579.15	Dynlt1c	0.378766	2.31939	1.19591	0.292132	0.55986	41	20	59	177	124	70	27	80	16	49	72
ENSMUSG00000000581.9	C1d	-0.395474	5.1791	0.629532	0.44043	0.67892	504	517	417	357	232	195	443	308	533	532	158
ENSMUSG00000000594.8	Gm2a	-0.469876	6.2974	4.5678	0.0502207	0.267563	729	833	873	968	759	991	955	1257	672	899	1239
ENSMUSG00000000600.16	Krit1	1.13555	4.45879	11.8824	0.00379586	0.107101	256	109	242	1118	602	384	93	152	66	206	237
ENSMUSG00000000605.10	Clcn4	0.0808852	7.23785	0.173969	0.682771	0.842849	2028	1097	1921	3353	2377	2024	1148	2460	860	1919	1840
ENSMUSG00000000627.16	Sema4f	0.0714666	5.0071	0.0677396	0.798349	0.906622	272	181	321	860	645	622	227	401	148	268	798
ENSMUSG00000000628.11	Hk2	1.03088	2.12177	4.20457	0.0590148	0.285311	20	11	45	158	96	184	18	28	12	25	73
ENSMUSG00000000631.21	Myo18a	-0.220827	7.00635	0.54288	0.473099	0.703983	875	750	1048	2877	2342	2672	1447	1414	744	912	3458
ENSMUSG00000000632.14	Sez6	-0.437596	6.92854	2.99064	0.105158	0.360169	994	691	976	2517	2250	1664	1410	1653	706	1112	3291
ENSMUSG00000000673.10	Haao	0.0924301	-0.627886	0.0315851	0.861422	0.939871	2	6	9	4	4	15	5	4	3	5	9
ENSMUSG00000000682.8	Cd52	2.192	2.91351	20.8294	0.000414074	0.0314616	76	61	132	176	117	420	8	35	33	37	16
ENSMUSG00000000686.12	Abhd15	0.211634	0.623225	0.300635	0.591901	0.786507	14	11	32	20	14	26	16	15	12	8	16
ENSMUSG00000000690.6	Hoxb6	0.344606	-0.399683	0.149563	0.704619	0.856113	16	14	2	5	3	8	7	0	8	0	12
ENSMUSG00000000693.11	Loxl3	-0.106716	2.38945	0.203079	0.658971	0.827756	41	40	44	103	71	120	51	72	31	58	83
ENSMUSG00000000706.17	Btn1a1	3.81401	0.176051	12.4074	0.00326197	0.100198	0	2	7	64	24	62	0	5	0	1	0
ENSMUSG00000000708.15	Kat2b	0.622937	5.10689	9.15717	0.00885025	0.147132	442	305	564	943	566	583	210	358	147	448	312
ENSMUSG00000000711.4	Rab5b	-0.349055	7.3647	2.76216	0.118167	0.376428	1882	1461	1934	2259	2064	1892	2047	2240	1275	1714	2895
ENSMUSG00000000730.14	Dnmt3l	-0.719481	-2.13085	0.598087	0.451842	0.687315	1	1	2	0	0	0	2	1	0	1	1
ENSMUSG00000000731.16	Aire	3.22772	-0.95459	11.7422	0.00395492	0.10886	1	1	4	17	8	22	0	0	0	0	3
ENSMUSG00000000732.10	Icosl	1.65281	3.74745	20.4996	0.000444242	0.0322606	87	86	198	553	374	465	33	97	31	58	142
ENSMUSG00000000738.19	Spg7	-0.0910806	5.57414	0.153844	0.700644	0.853771	606	518	686	666	566	480	465	716	297	535	726
ENSMUSG00000000739.15	Sult5a1	-0.229013	-1.1059	0.165157	0.690439	0.847232	1	1	4	9	6	4	1	2	5	3	7
ENSMUSG00000000740.13	Rpl13	-0.855166	8.64548	2.58747	0.129453	0.391505	4137	5619	4189	2043	1725	1922	5113	6200	6741	5441	2278
ENSMUSG00000000743.10	Chmp1a	-0.54081	6.95504	3.2747	0.0913142	0.341275	1322	1471	1366	1313	1023	1099	1465	1871	1454	1450	1525
ENSMUSG00000000751.14	Rpa1	-0.389083	5.80566	3.2005	0.0947069	0.345922	630	561	634	768	572	619	638	752	532	636	862
ENSMUSG00000000753.16	Serpinf1	-0.51552	3.59983	3.69861	0.0744999	0.315505	116	138	122	141	99	148	179	165	100	128	195
ENSMUSG00000000759.15	Tubgcp3	0.0717169	5.09019	0.182819	0.675299	0.838393	367	277	407	739	577	525	296	498	176	350	556
ENSMUSG00000000766.19	Oprm1	0.416866	-0.8817	0.218307	0.647338	0.820194	2	0	0	4	28	4	4	1	3	3	6
ENSMUSG00000000776.14	Polr3d	-0.138129	3.8899	0.623891	0.442443	0.679851	160	144	154	250	200	222	136	207	98	197	217
ENSMUSG00000000782.17	Tcf7	-0.679122	1.81695	7.63149	0.0149727	0.174184	30	23	30	47	36	51	48	56	23	37	73
ENSMUSG00000000787.13	Ddx3x	0.601265	7.69051	7.94165	0.0134079	0.169413	2665	1524	3008	5691	3315	4603	1441	1777	1307	2296	1729
ENSMUSG00000000791.10	Il12rb1	3.65785	3.06848	23.8527	0.000224073	0.0217713	21	19	50	455	217	636	8	20	9	10	14
ENSMUSG00000000792.3	Slc5a5	-0.366198	3.66288	2.03468	0.175108	0.445091	154	108	167	169	147	113	180	198	73	132	204
ENSMUSG00000000794.10	Kcnn3	0.493055	4.72919	4.40764	0.0538932	0.274039	242	166	252	852	701	513	182	320	141	252	305
ENSMUSG00000000804.15	Usp32	0.466596	6.21882	5.2231	0.0379547	0.241389	902	475	861	2197	1662	1320	502	765	365	878	928
ENSMUSG00000000805.19	Car4	-0.411922	5.00187	3.74067	0.0730419	0.312536	289	275	390	584	429	273	430	467	199	397	543
ENSMUSG00000000811.15	Txnrd3	-0.403789	2.65646	1.12661	0.306011	0.571664	59	89	73	56	32	84	67	68	75	73	84
ENSMUSG00000000817.11	Fasl	4.1039	-1.142	20.9644	0.000402396	0.0306733	1	3	4	17	6	13	0	0	1	0	0
ENSMUSG00000000823.17	Zfp512b	0.126564	5.94801	0.192712	0.667197	0.832461	566	385	714	1463	1047	1377	341	789	238	582	1598
ENSMUSG00000000826.17	Dnajc5	-0.00110361	8.14587	2.03232e-05	0.996465	0.997992	2810	1697	3025	6241	5285	5316	2573	3580	1367	2440	6476
ENSMUSG00000000827.19	Tpd52l2	-0.18726	5.80216	0.642982	0.435692	0.675002	730	605	658	818	598	617	512	882	483	722	606
ENSMUSG00000000838.18	Fmr1	1.01065	4.90658	8.99611	0.00933714	0.150011	256	138	330	1493	787	660	208	158	142	223	297
ENSMUSG00000000861.16	Bcl11a	0.20508	5.34298	0.864737	0.367774	0.622766	406	263	458	1139	864	625	339	528	161	433	691
ENSMUSG00000000869.13	Il4	0.0640737	-0.611474	0.0247113	0.877276	0.947371	3	3	4	18	7	10	4	6	3	4	10
ENSMUSG00000000876.12	Pxmp4	-0.432256	3.64448	4.16574	0.0600587	0.287149	131	129	124	173	148	126	127	208	87	165	218
ENSMUSG00000000881.13	Dlg3	-0.0229638	6.61072	0.0129169	0.911086	0.96301	1086	570	1137	2184	1855	1425	776	1505	504	1105	1784
ENSMUSG00000000884.18	Gnb1l	-0.36017	2.24485	1.45952	0.246512	0.517637	48	54	61	63	35	49	49	74	46	50	60
ENSMUSG00000000889.9	Dbh	-0.0521614	1.30421	0.00862054	0.927307	0.968939	19	51	28	8	16	37	21	22	18	11	61
ENSMUSG00000000901.18	Mmp11	-0.964429	1.17076	7.92218	0.0135004	0.169413	23	13	25	16	12	24	34	37	18	31	36
ENSMUSG00000000902.14	Smarcb1	-0.439563	5.62427	5.45228	0.03452	0.234345	440	389	498	794	659	683	649	727	329	484	1007
ENSMUSG00000000903.4	Vpreb3	-0.543769	-1.961	0.548224	0.470968	0.702582	0	1	0	3	1	2	1	3	0	1	2
ENSMUSG00000000915.16	Hip1r	-0.500313	6.41898	6.58464	0.0220552	0.20042	644	699	807	1452	1164	1172	1058	1149	708	822	1863
ENSMUSG00000000916.16	Nsun5	-0.189132	3.97287	1.08663	0.314438	0.579127	124	148	164	312	207	256	134	208	139	195	226
ENSMUSG00000000934.10	Top1mt	-0.513635	3.23304	5.36808	0.0357379	0.236452	106	75	103	125	104	97	91	176	88	127	119
ENSMUSG00000000942.11	Hoxa4	-0.0703816	-0.207283	0.00797319	0.930082	0.970029	11	13	2	7	4	16	13	1	6	0	19
ENSMUSG00000000948.17	Gm38393	0.271103	1.62706	0.364379	0.555493	0.763454	14	22	14	130	63	55	30	21	29	14	42
ENSMUSG00000000957.12	Mmp14	-0.139055	4.23452	0.14606	0.707921	0.857868	90	95	161	367	249	635	270	182	125	151	331
ENSMUSG00000000958.11	Slc7a7	0.801639	1.24167	7.25526	0.0171624	0.184377	24	15	26	62	45	65	13	27	13	14	18
ENSMUSG00000000959.8	Oxa1l	0.00304507	5.47726	0.000227776	0.988166	0.997098	536	458	639	653	555	625	388	649	273	572	581
ENSMUSG00000000976.14	Heatr6	0.2279	3.93623	0.463207	0.506946	0.728975	116	78	155	498	309	320	96	179	47	135	379
ENSMUSG00000000982.6	Ccl3	6.14265	3.29306	35.9229	2.94717e-05	0.00771308	14	9	204	566	249	650	3	7	1	2	0
ENSMUSG00000000983.14	Wfdc18	-1.78168	-0.317505	8.85761	0.0097806	0.152061	9	4	4	2	2	2	18	13	8	12	5
ENSMUSG00000001014.7	Icam4	-0.0960627	-0.346009	0.0260745	0.873967	0.945542	7	12	9	4	2	11	9	15	3	6	3
ENSMUSG00000001016.13	Ilf2	0.273373	5.80078	1.30427	0.272106	0.541271	772	445	777	1139	813	993	271	873	242	840	662
ENSMUSG00000001017.16	Chtop	-0.238508	7.0764	1.75533	0.205888	0.479695	1568	1133	1601	2284	1749	1670	1320	2002	1118	1729	1801
ENSMUSG00000001018.16	Snapin	-0.15842	5.29142	0.420311	0.527005	0.743955	505	388	516	510	418	519	280	689	280	612	436
ENSMUSG00000001020.9	S100a4	0.121334	1.02445	0.0381708	0.847836	0.933304	20	38	25	9	18	30	11	14	36	17	6
ENSMUSG00000001021.14	S100a3	0.569423	-0.232061	1.39793	0.256263	0.526335	4	9	6	19	5	26	4	9	6	5	5
ENSMUSG00000001023.11	S100a5	-1.05991	2.37655	5.01822	0.0413677	0.249968	17	72	50	51	44	13	93	107	42	76	60
ENSMUSG00000001025.9	S100a6	-0.199115	4.13877	0.329366	0.574905	0.776426	156	178	185	207	135	443	191	268	203	176	116
ENSMUSG00000001027.8	Scn4a	4.4497	-0.379171	11.8508	0.00383099	0.107551	1	1	0	56	6	39	1	0	0	0	1
ENSMUSG00000001029.16	Icam2	-0.224362	2.134	0.535262	0.476164	0.706211	38	56	46	57	38	70	39	61	42	61	40
ENSMUSG00000001034.18	Mapk7	-0.165813	4.48177	0.605584	0.449078	0.685193	168	161	236	460	325	445	191	343	108	265	462
ENSMUSG00000001036.18	Epn2	-0.253488	6.78687	1.80574	0.199852	0.47305	1121	862	1265	2018	1695	1361	1212	1521	680	1134	2267
ENSMUSG00000001039.13	B9d1	-0.684686	3.17296	4.51249	0.0514546	0.269888	85	99	86	108	80	70	64	147	130	140	100
ENSMUSG00000001052.16	Sec24b	0.455575	5.25818	1.94764	0.18403	0.455657	322	176	373	1200	914	981	261	372	153	257	816
ENSMUSG00000001053.16	N4bp3	-0.635408	4.16733	4.52571	0.0511564	0.269213	174	179	213	160	147	196	236	269	221	213	196
ENSMUSG00000001054.10	Rmnd5b	-0.152782	4.96547	0.465392	0.505962	0.728627	408	285	430	441	362	375	272	570	174	417	432
ENSMUSG00000001056.4	Nhp2	-0.723146	4.8778	2.53093	0.133385	0.396335	364	365	339	189	140	166	298	520	408	461	217
ENSMUSG00000001062.19	Vps9d1	-0.329367	5.5175	3.84784	0.0694782	0.304974	473	395	530	766	564	558	439	721	357	534	802
ENSMUSG00000001065.16	Zfp276	0.0358884	4.64918	0.0338922	0.856509	0.93779	217	222	275	525	441	435	236	367	110	262	436
ENSMUSG00000001076.8	C1ql4	-0.769411	0.708338	1.5418	0.234233	0.507	20	21	15	3	8	12	24	8	27	12	24
ENSMUSG00000001082.13	Mfsd10	-0.00740541	4.11311	0.00158254	0.968815	0.987898	165	153	237	319	217	306	139	268	95	212	261
ENSMUSG00000001089.15	Luzp1	0.038904	6.71635	0.0498351	0.826492	0.922824	1079	811	1121	2237	1970	1745	992	1290	749	951	1703
ENSMUSG00000001098.16	Kctd10	-0.361294	6.1529	2.91309	0.109369	0.365712	722	711	690	949	805	1081	896	969	660	727	1034
ENSMUSG00000001100.11	Poldip2	-0.513618	6.68681	2.5588	0.131429	0.393762	1110	1290	1231	922	804	884	1142	1578	1154	1310	1261
ENSMUSG00000001103.8	Sebox	-0.263756	2.49093	0.422198	0.526092	0.743435	58	85	71	60	35	56	51	84	58	86	34
ENSMUSG00000001105.16	Ift20	-0.353232	5.00492	1.25684	0.280633	0.549217	469	323	366	480	293	227	231	527	313	571	303
ENSMUSG00000001119.8	Col6a1	0.264478	4.97662	0.712026	0.412598	0.658361	310	195	244	1174	784	380	190	454	133	253	644
ENSMUSG00000001120.16	Pcbp3	-0.369252	5.6536	2.72484	0.120474	0.379212	388	497	456	849	747	674	667	654	331	439	1095
ENSMUSG00000001123.16	Lgals9	3.10246	4.82046	29.487	8.08672e-05	0.0130462	154	72	283	1424	765	1869	58	89	32	56	66
ENSMUSG00000001127.13	Araf	0.359192	6.66882	2.52189	0.134027	0.396843	1435	826	1391	2478	1731	1498	495	1486	440	1365	1318
ENSMUSG00000001128.8	Cfp	0.951552	2.62777	5.16424	0.0389003	0.24417	25	31	59	291	203	125	33	73	19	37	67
ENSMUSG00000001131.12	Timp1	3.16785	0.922234	17.0655	0.000966773	0.0510659	7	8	23	54	34	134	2	6	5	3	0
ENSMUSG00000001134.10	Uxt	-0.33616	2.29937	0.769942	0.394667	0.644659	63	54	62	53	40	47	38	86	58	70	28
ENSMUSG00000001138.14	Cnnm3	0.0387862	4.82287	0.0161386	0.900671	0.95841	194	168	326	715	477	633	267	281	118	215	743
ENSMUSG00000001143.14	Lman2l	-0.401261	5.24675	3.48047	0.0826413	0.327636	298	232	288	830	742	483	433	584	292	356	757
ENSMUSG00000001150.8	Mcm3ap	-0.0118126	5.4734	0.00305429	0.956688	0.981695	375	313	515	1110	782	707	394	530	247	398	979
ENSMUSG00000001151.11	Pcnt	0.356675	4.79228	1.14416	0.302412	0.56893	215	147	306	794	574	712	187	246	103	195	690
ENSMUSG00000001155.14	Ftcd	0.983077	-2.18313	0.700557	0.416298	0.661148	2	3	0	0	1	0	0	1	0	0	1
ENSMUSG00000001156.10	Mxd1	0.457252	4.72549	1.90482	0.188632	0.460748	166	128	257	834	662	712	169	306	105	196	505
ENSMUSG00000001157.14	Gmcl1	0.0574579	4.0606	0.0757384	0.787075	0.900763	199	94	174	430	323	234	119	245	92	194	273
ENSMUSG00000001158.14	Snrnp27	-0.480788	4.93087	1.37863	0.259425	0.529139	401	379	341	288	221	224	255	489	422	473	178
ENSMUSG00000001166.18	Oas1c	0.848359	1.9334	5.203	0.0382745	0.241888	42	59	43	70	40	111	18	38	32	24	19
ENSMUSG00000001173.16	Ocrl	0.433913	5.6526	4.42294	0.0535289	0.274032	666	350	670	1239	950	935	317	651	189	506	790
ENSMUSG00000001175.17	Calm1	-0.0212355	10.8683	0.0064322	0.937184	0.972537	27546	16339	24383	30260	26790	20904	12696	31743	10785	27585	24141
ENSMUSG00000001211.16	Agpat3	-0.232632	8.16523	1.52356	0.236884	0.508992	2700	2616	3206	4721	3970	4311	2998	3963	1980	3013	5467
ENSMUSG00000001225.13	Slc26a3	0.346492	-1.90971	0.224844	0.642497	0.817145	2	1	1	4	0	2	2	1	0	1	1
ENSMUSG00000001227.13	Sema6b	-0.885089	6.82975	12.0176	0.00364933	0.10521	981	934	1122	1128	1028	1132	1736	1645	1432	1171	1869
ENSMUSG00000001228.15	Uhrf1	0.508041	0.490379	1.00114	0.333585	0.594976	7	5	7	35	16	61	13	9	8	10	13
ENSMUSG00000001229.10	Dpp9	-0.31898	5.32534	1.3482	0.264516	0.5337	315	203	300	938	821	611	442	517	205	381	1046
ENSMUSG00000001240.14	Ramp2	0.203565	4.22294	0.627564	0.441131	0.679067	180	256	288	322	217	263	206	269	109	168	172
ENSMUSG00000001247.17	Lsr	-0.0286831	3.13065	0.020147	0.889098	0.953374	66	86	106	173	135	137	93	108	64	85	120
ENSMUSG00000001248.16	Gramd1a	-0.0880978	6.35962	0.256199	0.620419	0.804124	799	629	832	1707	1391	1361	770	1213	456	878	1500
ENSMUSG00000001249.15	Hpn	0.781355	0.698368	1.97775	0.18088	0.452273	2	9	12	90	28	33	6	16	6	7	25
ENSMUSG00000001260.11	Gabrg1	0.178569	3.9178	0.386241	0.544015	0.756061	189	158	202	377	213	143	168	115	144	146	127
ENSMUSG00000001270.10	Ckb	-0.638471	10.8758	4.08006	0.0624397	0.292213	18977	20075	22623	17824	15662	15638	27124	31893	16369	23881	25777
ENSMUSG00000001280.14	Sp1	0.49026	4.85958	3.23572	0.0930781	0.34363	271	142	272	871	667	783	181	307	144	251	464
ENSMUSG00000001281.11	Itgb7	0.119215	1.08483	0.117413	0.736817	0.873779	11	23	28	25	24	53	17	22	11	25	29
ENSMUSG00000001285.13	Myg1	-0.352272	4.72962	3.24789	0.0925231	0.343175	280	258	302	408	309	288	289	475	183	311	406
ENSMUSG00000001288.16	Rarg	-0.451925	3.23061	4.54873	0.0506421	0.268533	67	64	105	148	149	124	97	159	59	98	205
ENSMUSG00000001289.13	Pfdn5	-0.604139	7.19427	1.52991	0.235957	0.508344	1713	2177	1687	966	730	773	1607	2625	1987	2019	864
ENSMUSG00000001300.17	Efnb2	0.226272	4.57534	0.809221	0.383176	0.635229	220	121	259	730	560	379	182	328	105	229	407
ENSMUSG00000001305.6	Rrp15	0.277711	2.49956	0.760543	0.397494	0.646811	65	30	54	144	76	153	35	84	15	65	92
ENSMUSG00000001313.13	Rnd2	-0.87783	7.84465	2.82647	0.114317	0.371865	2113	3594	1989	1232	1057	1115	3092	2870	4244	2363	2086
ENSMUSG00000001323.18	Srr	0.0810022	5.69515	0.132855	0.720797	0.864894	736	398	587	1189	917	553	354	874	290	730	578
ENSMUSG00000001333.10	Sync	-0.00264241	-0.748451	5.8598e-05	0.993998	0.997796	7	3	4	9	7	6	2	7	3	3	10
ENSMUSG00000001334.10	Fndc5	-0.877006	7.60058	6.87112	0.0197899	0.193379	1702	2181	1758	1631	1372	1652	2853	2623	2741	2327	2487
ENSMUSG00000001348.16	Acp5	-0.460116	-0.158988	0.69891	0.416834	0.661483	8	3	7	3	8	23	9	9	13	7	6
ENSMUSG00000001349.6	Cnn1	-0.772712	-0.521673	3.44731	0.08397	0.329583	6	4	4	11	7	2	9	7	5	8	9
ENSMUSG00000001366.15	Fbxo9	-0.411781	6.44418	1.86574	0.192959	0.465376	1169	1023	1026	805	715	760	881	1420	753	1188	1230
ENSMUSG00000001376.18	Vps50	0.145928	5.42876	0.207545	0.655506	0.824951	774	407	637	784	475	392	336	508	359	649	267
ENSMUSG00000001380.8	Hars	-0.0941056	5.95111	0.125771	0.728008	0.868727	832	674	913	754	598	744	519	1063	442	838	653
ENSMUSG00000001383.10	Zmat2	-0.187089	6.96683	0.391714	0.541213	0.753946	1738	1442	1577	1567	1198	1284	845	2289	1104	1872	1176
ENSMUSG00000001403.14	Ube2c	1.58731	-0.349889	5.12333	0.0395739	0.245813	1	4	3	30	11	33	3	4	0	5	4
ENSMUSG00000001415.11	Smg5	-0.356217	6.80478	3.32882	0.0889313	0.337309	955	939	1044	1872	1450	1911	1179	1389	1091	1096	2075
ENSMUSG00000001416.14	Cct3	-0.27601	6.74065	1.86547	0.192989	0.465376	1276	980	1291	1541	1218	1335	1208	1668	834	1311	1367
ENSMUSG00000001418.14	Glmp	-0.413033	5.48808	4.02533	0.0640194	0.294687	462	447	508	621	466	524	496	753	387	580	583
ENSMUSG00000001419.18	Mef2d	-0.10503	7.07443	0.0800727	0.781234	0.897313	801	631	1045	3497	2791	3117	1293	1408	644	854	4055
ENSMUSG00000001420.14	Tmem79	-0.549585	-1.05195	1.16851	0.297514	0.564266	5	2	2	4	4	5	5	5	5	1	5
ENSMUSG00000001424.15	Snd1	-0.162856	5.90296	0.886549	0.361973	0.618088	629	516	651	1085	839	908	619	786	387	603	1152
ENSMUSG00000001435.16	Col18a1	0.380422	4.20266	1.33821	0.266217	0.535481	88	111	257	580	339	464	132	161	75	157	385
ENSMUSG00000001436.16	Slc19a1	-0.230425	4.08935	1.29999	0.272861	0.542007	178	168	211	254	199	222	184	211	137	175	291
ENSMUSG00000001440.6	Kpnb1	0.0800933	7.12423	0.201172	0.660464	0.8288	1518	1034	1543	3027	2240	2705	1156	1792	808	1428	2461
ENSMUSG00000001441.14	Npepps	0.038529	6.66742	0.0262953	0.873439	0.945373	1064	594	970	2699	2103	1567	982	1430	435	954	1975
ENSMUSG00000001444.3	Tbx21	-0.0798007	0.60473	0.0171406	0.897652	0.956948	4	11	1	31	35	37	21	20	3	7	29
ENSMUSG00000001445.11	Mrpl10	-0.41143	5.41337	3.90042	0.0678054	0.302282	517	378	496	542	440	489	445	695	365	551	619
ENSMUSG00000001467.6	Cyp51	-0.303029	5.67857	3.15582	0.0968228	0.348817	607	413	480	812	776	646	479	797	416	682	748
ENSMUSG00000001472.18	Tcf25	-0.455766	9.37092	3.32585	0.0890603	0.337488	7377	6660	7368	7629	6284	7966	8068	10196	6018	7637	9781
ENSMUSG00000001473.8	Tubb6	0.779223	2.9565	3.75959	0.0723973	0.311107	33	39	80	252	140	324	56	64	28	57	102
ENSMUSG00000001482.16	Def8	-0.495259	5.92685	5.44094	0.0346812	0.234347	537	574	636	893	705	717	780	760	652	628	963
ENSMUSG00000001493.10	Meox1	-0.491522	0.175032	1.70367	0.212319	0.486052	12	12	7	12	13	8	10	13	8	20	12
ENSMUSG00000001494.7	Sost	-2.27454	-1.07277	13.3218	0.00252461	0.0881379	1	3	0	1	2	2	7	5	2	12	6
ENSMUSG00000001496.16	Nkx2-1	-0.443483	0.125621	0.900241	0.3584	0.614616	6	5	3	16	20	20	15	14	4	5	24
ENSMUSG00000001504.11	Irx2	0.154588	2.73858	0.243353	0.629247	0.810083	68	68	98	105	74	132	84	37	46	52	105
ENSMUSG00000001506.11	Col1a1	-0.777581	2.6301	2.31123	0.150134	0.416312	16	16	29	135	127	105	75	69	33	32	256
ENSMUSG00000001507.17	Itga3	0.00263934	4.76098	6.79737e-05	0.993535	0.997796	182	176	267	538	411	776	240	294	144	175	713
ENSMUSG00000001508.16	Sgca	0.463257	-1.05876	0.671321	0.425971	0.66773	2	4	9	5	6	3	1	2	2	2	8
ENSMUSG00000001510.9	Dlx3	-0.317317	-1.57404	0.255106	0.621159	0.804632	1	2	2	2	2	4	4	1	0	3	3
ENSMUSG00000001517.15	Foxm1	0.216857	0.595737	0.241326	0.630667	0.810536	9	8	11	34	32	33	2	23	6	18	24
ENSMUSG00000001518.13	Itfg2	-0.0804462	4.39355	0.0921613	0.765798	0.889281	151	145	216	474	347	429	236	271	84	174	479
ENSMUSG00000001520.13	Nrip2	-0.330982	4.85065	2.7395	0.119561	0.378434	265	287	268	510	386	363	359	355	255	271	492
ENSMUSG00000001521.13	Tulp3	0.673896	4.56236	4.09549	0.062003	0.29139	157	142	236	771	560	714	139	251	67	178	415
ENSMUSG00000001524.15	Gtf2h4	-0.60889	3.98786	2.58862	0.129374	0.39143	205	184	172	163	111	85	207	253	189	204	139
ENSMUSG00000001525.11	Tubb5	-0.776305	8.86368	5.89379	0.0288739	0.219386	4986	4708	5116	3303	3889	3578	6382	7754	4979	5980	6822
ENSMUSG00000001542.8	Ell2	0.575959	4.01173	6.33141	0.0243111	0.208606	225	104	202	480	305	304	94	176	73	216	141
ENSMUSG00000001552.15	Jup	-0.199454	5.65572	0.573009	0.461296	0.694717	386	332	485	1161	867	857	599	594	219	439	1273
ENSMUSG00000001555.11	Fkbp10	-0.374025	2.89864	1.43678	0.250053	0.520295	74	93	76	58	68	113	102	98	55	82	113
ENSMUSG00000001558.6	Klhl10	-0.0754987	-0.935787	0.0258583	0.874485	0.945824	2	1	5	10	6	7	1	6	3	5	6
ENSMUSG00000001569.11	Nom1	0.258325	4.49129	1.80031	0.200491	0.4738	294	173	286	501	317	438	123	301	131	279	307
ENSMUSG00000001576.16	Ergic1	-0.302127	6.45951	2.59212	0.129135	0.391134	883	623	946	1384	1214	1488	976	1346	522	932	1771
ENSMUSG00000001583.14	Tnk1	0.274098	-2.3136	0.0786424	0.783142	0.898569	0	0	1	2	0	1	0	0	1	0	1
ENSMUSG00000001588.13	Acap1	1.23855	-0.848953	1.71888	0.2104	0.484575	2	0	0	4	15	26	3	1	0	4	4
ENSMUSG00000001604.15	Tcea3	-0.764559	-0.221686	4.96504	0.0423116	0.253103	5	5	7	11	6	10	11	15	4	8	13
ENSMUSG00000001627.13	Ifrd1	0.928356	4.32927	11.535	0.00420422	0.111642	285	133	305	598	323	544	79	252	70	223	137
ENSMUSG00000001630.14	Stk38l	0.243682	4.6458	2.08907	0.169808	0.439089	288	220	279	626	385	456	161	338	142	295	338
ENSMUSG00000001632.17	Brpf1	0.32559	5.17238	1.78536	0.202264	0.476134	306	248	445	900	623	916	252	429	143	330	689
ENSMUSG00000001642.19	Akr1b3	-0.207888	5.47678	0.839768	0.374584	0.628841	535	479	526	596	496	564	428	702	356	629	471
ENSMUSG00000001661.6	Hoxc6	-1.73757	-2.18539	2.6653	0.124269	0.384177	1	1	0	0	0	0	1	0	1	0	4
ENSMUSG00000001663.11	Gstt1	-0.34943	4.00817	1.53122	0.235766	0.50826	165	191	198	192	126	199	186	263	129	233	156
ENSMUSG00000001665.12	Gstt3	-0.587485	2.45756	2.46338	0.138278	0.401849	55	74	46	46	44	54	105	71	35	53	85
ENSMUSG00000001666.9	Ddt	-0.418253	4.99785	2.55012	0.132034	0.394632	388	330	375	378	291	326	360	577	265	453	333
ENSMUSG00000001670.14	Tat	-0.0540076	-2.13183	0.00312113	0.956217	0.981383	0	0	0	2	2	2	1	0	0	1	2
ENSMUSG00000001672.15	Marveld3	0.112623	-0.527637	0.0473724	0.83076	0.924969	4	7	7	9	9	9	5	8	8	4	1
ENSMUSG00000001674.12	Ddx18	0.182425	3.9212	0.701975	0.415838	0.661006	217	120	219	269	210	240	108	220	68	209	189
ENSMUSG00000001687.16	Ubl3	-0.0976887	6.91557	0.271268	0.610414	0.799154	1418	888	1577	2249	1920	1501	1056	1929	707	1689	1634
ENSMUSG00000001700.11	Gramd3	-0.505138	3.93189	4.42647	0.0534453	0.273902	145	154	150	225	158	166	121	320	107	276	189
ENSMUSG00000001707.9	Eef1e1	-0.345883	4.49004	0.788232	0.389252	0.640386	282	309	264	222	189	166	234	254	269	361	153
ENSMUSG00000001729.15	Akt1	-0.584598	7.45091	3.91957	0.0672082	0.301095	1777	2070	1831	1755	1421	1691	2462	2578	1827	1868	2467
ENSMUSG00000001739.15	Cldn15	1.3144	-0.477022	2.43212	0.140617	0.405135	1	2	1	43	9	18	2	3	6	0	4
ENSMUSG00000001741.13	Il16	0.268375	4.95879	0.702396	0.415701	0.661006	215	172	498	848	616	592	239	305	88	306	717
ENSMUSG00000001750.17	Tcirg1	1.20523	4.84456	14.1078	0.00204057	0.078407	182	169	320	1119	816	959	151	254	121	178	209
ENSMUSG00000001751.10	Naglu	-0.424611	3.72911	2.34839	0.147126	0.412548	139	126	158	136	96	219	174	163	121	167	178
ENSMUSG00000001755.13	Coasy	-0.58537	4.79947	5.67617	0.0315101	0.226941	294	270	286	335	277	272	351	399	322	326	362
ENSMUSG00000001761.8	Smo	-0.764197	3.8792	12.9913	0.00276655	0.0934526	112	139	140	181	148	145	174	246	151	180	267
ENSMUSG00000001763.15	Tspan33	-0.386792	4.7604	4.11645	0.0614151	0.290476	260	250	303	424	341	307	343	378	225	289	433
ENSMUSG00000001767.6	Crnkl1	0.521047	3.19725	4.96159	0.0423737	0.253317	139	78	124	240	162	123	56	121	44	112	71
ENSMUSG00000001768.17	Rin2	1.05677	4.87374	24.094	0.000213829	0.0214919	383	209	387	1105	614	677	129	287	108	251	263
ENSMUSG00000001773.15	Folh1	0.804363	2.48636	7.02962	0.018653	0.189973	57	41	68	189	109	130	47	30	39	44	35
ENSMUSG00000001774.9	Chordc1	0.576991	5.02537	3.16264	0.0964962	0.348216	355	171	279	1367	971	373	259	273	185	361	286
ENSMUSG00000001783.4	Rtcb	-0.492527	7.25492	1.68667	0.214493	0.488509	1762	1953	1824	1256	1061	1378	1687	2046	2168	1732	1418
ENSMUSG00000001785.14	Pwp1	0.0312863	4.05026	0.0167457	0.898831	0.957408	230	180	230	263	186	191	139	255	111	220	162
ENSMUSG00000001786.15	Fbxo7	0.11935	5.43605	0.585652	0.45649	0.691324	490	370	457	974	671	786	330	572	310	449	610
ENSMUSG00000001794.14	Capns1	-0.760021	7.35788	6.86186	0.0198589	0.193447	1601	1680	1520	1512	1240	1795	2515	2478	1889	1831	2215
ENSMUSG00000001802.17	Lrp3	-0.412127	5.97127	4.83623	0.0447043	0.257575	528	416	630	1015	909	1050	651	887	436	690	1431
ENSMUSG00000001815.16	Evx2	1.07826	-0.933507	1.84128	0.195731	0.468336	10	7	3	8	4	5	6	2	3	0	0
ENSMUSG00000001827.13	Folr1	-0.837455	3.08405	4.53651	0.0509143	0.269008	108	91	75	74	55	41	109	141	120	96	95
ENSMUSG00000001829.18	Clpb	-0.278739	5.43345	2.68142	0.123227	0.383094	455	374	460	766	637	492	473	596	308	506	745
ENSMUSG00000001833.18	Septin7	0.124814	7.40658	0.212747	0.651526	0.822416	2328	1594	2241	4094	2213	1848	1667	1476	1530	2257	1298
ENSMUSG00000001844.11	Zdhhc4	-0.130305	4.44776	0.305922	0.588695	0.784815	228	254	298	281	205	328	218	338	153	229	316
ENSMUSG00000001847.15	Rac1	-0.177272	7.8202	1.03896	0.324917	0.587751	2435	1684	2443	4148	3281	3654	2429	3330	1456	2457	3734
ENSMUSG00000001855.16	Nup214	0.0101089	4.83251	0.000763815	0.978332	0.992768	174	132	204	780	561	761	241	281	148	193	787
ENSMUSG00000001864.14	Aif1l	-1.33971	3.76954	11.8561	0.00382507	0.107551	130	129	96	79	82	50	197	214	208	198	221
ENSMUSG00000001870.17	Ltbp1	1.69722	2.92372	9.3047	0.00842977	0.144404	32	21	50	427	255	286	20	46	13	36	82
ENSMUSG00000001891.17	Ugp2	-0.243163	5.94363	0.543992	0.472654	0.703679	904	613	787	925	578	512	553	880	577	1108	393
ENSMUSG00000001901.16	Kcnh6	0.00100472	0.529396	4.86627e-06	0.99827	0.998906	5	8	9	32	39	21	15	17	2	14	26
ENSMUSG00000001909.17	Trmt1	-0.0983376	5.95349	0.22915	0.639356	0.81552	649	723	748	1001	694	875	525	874	552	663	849
ENSMUSG00000001910.6	Nacc1	-0.229777	6.8477	1.07459	0.31704	0.581268	983	824	1138	2027	1725	2288	1316	1501	681	1018	2563
ENSMUSG00000001911.17	Nfix	0.432087	6.81701	0.530582	0.478064	0.707305	468	303	777	4285	3012	3557	769	784	239	413	3699
ENSMUSG00000001918.18	Slc1a5	1.13141	2.34631	6.26653	0.0249315	0.210751	19	29	50	155	92	255	22	29	25	35	51
ENSMUSG00000001924.16	Uba1	-0.312564	7.95901	1.77353	0.203682	0.477176	2298	1752	2529	4242	3613	4242	3537	3208	1480	2038	5204
ENSMUSG00000001930.18	Vwf	0.40403	4.03849	0.46186	0.507555	0.729539	55	71	121	423	397	638	113	71	38	68	565
ENSMUSG00000001942.9	Siae	-0.183458	4.26728	0.826295	0.378338	0.631653	252	155	182	349	295	231	156	312	101	279	322
ENSMUSG00000001943.9	Vsig2	0.239231	1.39174	0.231488	0.637666	0.814511	22	8	16	76	51	69	8	45	3	30	52
ENSMUSG00000001946.15	Esam	0.0537977	4.27835	0.0740068	0.789459	0.901747	158	179	224	387	250	436	195	230	129	195	281
ENSMUSG00000001948.11	Spa17	-0.32793	1.17365	0.452324	0.511902	0.732969	21	35	25	29	13	17	29	30	26	26	8
ENSMUSG00000001962.9	Fam50a	0.219245	3.49311	1.07895	0.316094	0.580302	124	69	139	285	193	210	80	158	50	113	187
ENSMUSG00000001964.15	Emd	-0.0271898	4.99667	0.0167444	0.898835	0.957408	380	341	403	479	337	529	266	498	225	406	369
ENSMUSG00000001983.8	Taco1	-0.25634	2.833	1.05647	0.321012	0.584818	82	67	68	112	113	69	54	143	37	102	104
ENSMUSG00000001985.10	Grik3	0.275522	5.52525	0.224835	0.642504	0.817145	224	105	243	1624	1495	1142	305	383	116	198	1564
ENSMUSG00000001986.17	Gria3	0.638876	5.92637	3.42729	0.0847844	0.331125	542	250	507	2851	1649	1101	329	476	335	551	912
ENSMUSG00000001988.10	Npas1	-0.600406	3.25097	4.98816	0.0418982	0.251689	100	97	84	106	88	108	129	131	104	87	155
ENSMUSG00000001995.10	Sipa1l2	-0.106094	5.64616	0.0954927	0.761742	0.887079	345	277	342	1135	959	1262	596	457	288	308	1291
ENSMUSG00000001998.16	Ap4e1	1.22068	2.86496	7.23223	0.0173081	0.184705	63	24	78	328	203	210	12	67	16	59	94
ENSMUSG00000001999.16	Blvra	-0.270516	3.90322	0.541696	0.473573	0.704165	228	183	179	176	105	120	113	271	139	241	112
ENSMUSG00000002006.13	Pdzd4	-0.761728	7.15607	8.48338	0.0111055	0.159176	1392	1359	1319	1526	1454	1204	1891	2131	1793	1531	2203
ENSMUSG00000002007.6	Srpk3	-0.285026	2.28351	1.05874	0.320509	0.584219	43	30	39	104	68	85	26	97	27	52	107
ENSMUSG00000002010.18	Idh3g	-0.0420763	6.69292	0.0242444	0.878431	0.947934	1429	1110	1496	1524	1131	1100	662	1812	592	1653	1241
ENSMUSG00000002012.14	Pnck	-0.393973	6.00288	1.09915	0.311764	0.576803	833	877	795	609	527	331	698	979	694	768	707
ENSMUSG00000002014.13	Ssr4	-0.49058	5.65238	1.79661	0.200929	0.474391	575	633	622	492	323	418	501	764	662	673	431
ENSMUSG00000002015.6	Bcap31	-0.405621	5.56602	3.11671	0.098722	0.351094	580	465	518	618	463	522	531	821	384	660	557
ENSMUSG00000002017.11	Fam98a	0.0663082	4.80472	0.141805	0.711995	0.860056	324	232	290	620	498	406	179	360	221	307	430
ENSMUSG00000002020.16	Ltbp2	0.809375	3.13266	2.28955	0.151925	0.418406	26	42	112	355	236	234	40	42	16	51	226
ENSMUSG00000002028.14	Kmt2a	0.755732	6.82785	1.95822	0.182916	0.454935	569	340	864	4796	3688	3250	443	1028	236	575	2907
ENSMUSG00000002031.14	Ift46	-0.270996	5.14189	1.07995	0.315878	0.580048	450	390	469	452	323	334	319	542	313	469	454
ENSMUSG00000002032.18	Tmem25	-0.251426	5.8368	1.71677	0.210665	0.484653	543	439	675	1036	841	787	545	922	283	667	1199
ENSMUSG00000002033.15	Cd3g	3.30138	-1.20367	8.40191	0.0114208	0.160852	1	0	1	5	6	27	0	1	0	1	0
ENSMUSG00000002043.18	Trappc6a	-0.440988	3.20148	1.45143	0.247763	0.518713	97	123	111	98	68	72	88	133	122	113	83
ENSMUSG00000002052.7	Supt6	0.28313	6.84144	0.783816	0.390549	0.641375	766	610	1098	3265	2401	3178	901	1201	485	876	2513
ENSMUSG00000002055.10	Spag5	0.663	3.64088	8.79156	0.0100006	0.153851	108	127	165	433	261	186	62	116	70	117	154
ENSMUSG00000002058.14	Unc119	-0.702641	5.04456	3.70871	0.0741467	0.314811	314	437	370	263	205	224	401	548	402	401	419
ENSMUSG00000002059.19	Rab34	-0.34365	4.01456	1.48802	0.242164	0.513877	171	174	220	196	124	199	107	321	117	258	219
ENSMUSG00000002064.11	Sdf2	-0.394632	5.54433	1.64143	0.220417	0.493978	575	544	587	550	392	363	446	827	467	648	460
ENSMUSG00000002068.17	Ccne1	-0.618454	3.43874	6.59844	0.0219394	0.199883	123	87	120	100	118	112	114	199	103	139	165
ENSMUSG00000002076.13	Hsf2bp	0.221502	-0.881225	0.174271	0.682513	0.842669	3	6	4	6	6	8	5	6	0	3	6
ENSMUSG00000002083.14	Bbc3	-0.250865	2.88302	1.21087	0.289251	0.557302	48	65	88	133	85	131	82	95	64	89	91
ENSMUSG00000002100.16	Mybpc3	0.045563	2.48894	0.0202162	0.888909	0.953302	29	38	78	142	83	111	34	60	24	61	137
ENSMUSG00000002102.16	Psmc3	-0.513893	7.21875	2.12331	0.166574	0.435266	1693	1867	1772	1218	1111	1294	1607	2311	1789	2047	1426
ENSMUSG00000002103.17	Acp2	0.118137	6.266	0.503981	0.489116	0.715878	961	729	982	1478	1072	1212	596	1001	487	837	1180
ENSMUSG00000002104.12	Rapsn	-0.555619	-0.0897241	1.10833	0.309825	0.575144	6	14	11	5	4	7	15	14	4	10	9
ENSMUSG00000002105.16	Slc39a13	-0.255573	4.727	2.15752	0.16342	0.432121	259	260	296	431	341	347	274	361	191	324	443
ENSMUSG00000002107.19	Celf2	0.440489	7.30214	1.74225	0.207492	0.481401	1211	663	1275	6186	4592	2935	1053	1749	820	1294	2590
ENSMUSG00000002108.11	Nr1h3	-0.428036	2.57298	2.5774	0.130143	0.392093	47	66	61	79	66	74	58	68	68	82	76
ENSMUSG00000002109.15	Ddb2	0.402232	3.15867	2.09897	0.168865	0.437844	101	62	90	293	163	159	43	129	27	102	142
ENSMUSG00000002111.9	Spi1	1.12924	2.57019	10.4904	0.00577172	0.125087	60	33	88	128	105	250	24	55	34	40	34
ENSMUSG00000002129.12	Sf3a1	-0.0991252	5.69936	0.119828	0.734237	0.871772	398	295	428	1295	1042	1006	586	552	277	381	1269
ENSMUSG00000002147.19	Stat6	0.0771183	3.7337	0.179211	0.678319	0.840472	132	113	122	300	216	258	99	179	81	142	219
ENSMUSG00000002190.14	Clgn	0.303099	3.02828	1.22637	0.286304	0.554813	108	56	103	207	145	120	31	111	33	114	127
ENSMUSG00000002204.10	Napsa	1.72817	-0.754982	7.29252	0.0169298	0.183818	5	1	5	15	13	16	0	1	1	5	3
ENSMUSG00000002205.17	Vrk3	-0.492963	4.49367	4.83978	0.0446362	0.257434	231	238	226	306	228	231	276	340	210	287	304
ENSMUSG00000002210.12	Smg9	-0.123819	4.53901	0.330273	0.574385	0.776105	197	188	233	458	359	433	213	306	116	230	535
ENSMUSG00000002221.12	Paxip1	-0.00422102	4.70692	0.000484772	0.982737	0.994775	233	176	279	592	457	493	198	401	161	244	481
ENSMUSG00000002222.15	Rmnd5a	0.665737	6.58476	4.33515	0.0556588	0.277928	1027	448	1205	3298	2639	1764	395	1170	282	993	1503
ENSMUSG00000002227.16	Mov10	1.64701	3.78719	8.09756	0.0126931	0.166559	68	31	94	769	493	507	32	110	21	54	168
ENSMUSG00000002228.8	Ppm1j	-0.288674	1.55981	0.602135	0.450346	0.685847	23	48	25	24	36	32	29	37	30	32	36
ENSMUSG00000002233.14	Rhoc	0.534832	4.54077	3.44985	0.0838673	0.329559	193	165	248	617	380	770	182	287	160	209	141
ENSMUSG00000002249.22	Tead3	0.669067	1.83317	3.33181	0.0888022	0.337145	25	25	45	81	48	131	15	39	16	19	60
ENSMUSG00000002250.17	Ppard	-0.0270363	4.5157	0.0110059	0.917898	0.965539	180	146	221	532	382	507	230	270	102	200	524
ENSMUSG00000002257.9	Def6	0.375107	1.5016	0.837546	0.3752	0.629276	10	35	30	48	34	91	29	31	18	14	31
ENSMUSG00000002265.18	Peg3	1.08132	7.79547	5.72909	0.0308441	0.22526	1644	730	2000	10157	6918	6607	883	1493	631	1226	4048
ENSMUSG00000002266.18	Zim1	1.12778	2.82057	8.57267	0.0107716	0.1579	72	47	60	285	191	181	25	65	10	47	107
ENSMUSG00000002274.14	Metrn	-1.52177	7.84946	7.32789	0.0167123	0.183089	1481	2733	1686	752	784	766	3823	3223	4855	3288	1805
ENSMUSG00000002279.20	Lmf1	-0.546914	3.92537	6.10507	0.026557	0.214882	157	142	155	225	165	132	197	241	139	165	235
ENSMUSG00000002280.12	Ciao3	-0.510384	5.26616	3.94833	0.0663226	0.300127	415	410	431	418	349	401	429	610	419	452	508
ENSMUSG00000002289.17	Angptl4	1.13543	2.96884	7.44753	0.0160003	0.178696	53	80	69	188	92	408	58	43	40	43	57
ENSMUSG00000002297.17	Dbf4	0.99294	0.219755	6.92587	0.0193884	0.192314	14	8	10	32	27	20	5	9	2	13	7
ENSMUSG00000002307.17	Daxx	1.13109	5.04457	10.1018	0.00651931	0.132262	218	160	327	1226	804	1339	201	291	110	206	307
ENSMUSG00000002308.17	Cd320	-0.901106	4.14095	4.30946	0.0563011	0.279417	201	209	169	125	85	91	221	272	276	240	164
ENSMUSG00000002319.17	Ipo4	-0.17351	5.51088	0.6265	0.441511	0.679296	435	308	438	940	686	851	504	569	235	423	1037
ENSMUSG00000002320.16	Tm9sf1	-0.13575	5.02549	0.636273	0.438045	0.677081	370	290	412	559	406	451	289	486	225	412	479
ENSMUSG00000002324.9	Rec8	0.240734	3.0087	0.641961	0.436048	0.67529	60	93	103	171	90	181	79	101	25	59	152
ENSMUSG00000002325.16	Irf9	2.35906	5.22905	29.1257	8.59655e-05	0.0134111	294	170	458	1976	1305	1407	69	256	47	101	214
ENSMUSG00000002326.7	Gmpr2	-0.0364104	3.39633	0.0282341	0.868901	0.943347	131	86	127	201	167	122	70	170	67	159	122
ENSMUSG00000002329.8	Mdp1	-0.159028	4.71887	0.421214	0.526568	0.743683	364	250	348	361	278	317	182	475	181	396	322
ENSMUSG00000002332.17	Dhrs1	-0.184408	5.54099	0.680901	0.422762	0.665313	558	400	538	623	440	915	469	795	281	608	616
ENSMUSG00000002341.9	Ncan	-0.515171	6.04451	1.26008	0.280041	0.548584	393	160	328	1702	1643	959	479	868	298	567	2631
ENSMUSG00000002342.18	Tmem161a	-0.403853	4.78479	3.02367	0.103424	0.35803	268	308	307	374	319	265	320	385	269	289	423
ENSMUSG00000002343.12	Armc6	-0.784155	4.92029	5.40855	0.0351464	0.235382	307	340	328	258	223	187	431	445	364	385	395
ENSMUSG00000002345.19	Borcs8	-0.502092	4.49677	3.24079	0.0928461	0.343494	247	252	240	279	238	169	194	395	253	317	263
ENSMUSG00000002346.17	Slc25a42	0.0941003	4.40473	0.0488247	0.82823	0.923636	138	77	145	679	555	433	129	234	75	150	652
ENSMUSG00000002365.11	Snx9	0.066367	3.44434	0.12707	0.726668	0.868048	114	86	126	245	158	191	90	146	53	124	183
ENSMUSG00000002372.10	Ranbp3	-0.350611	6.18266	3.22985	0.0933473	0.344066	764	652	888	996	804	966	859	1060	570	791	1205
ENSMUSG00000002379.8	Ndufa11	-0.730493	6.42864	2.54654	0.132285	0.394704	992	1084	1077	526	431	438	1083	1499	1093	1295	639
ENSMUSG00000002384.3	Bmp8b	0.223888	-1.391	0.168299	0.687678	0.845785	1	2	1	9	2	6	1	2	2	3	3
ENSMUSG00000002393.15	Nr2f6	-1.04318	5.5271	5.48519	0.0340572	0.234345	394	539	472	286	258	217	692	642	798	562	422
ENSMUSG00000002395.15	Use1	-0.689035	6.49309	1.69615	0.213277	0.486823	927	1439	973	536	394	438	1006	1188	1559	1136	583
ENSMUSG00000002396.9	Ocel1	-0.40995	4.32953	3.44599	0.0840234	0.32963	154	177	155	436	340	201	236	269	178	190	381
ENSMUSG00000002409.19	Dyrk1b	-0.092056	4.23978	0.150543	0.703703	0.855401	166	161	159	437	352	274	199	204	139	132	399
ENSMUSG00000002413.16	Braf	1.10611	5.897	11.3078	0.00449862	0.114267	672	259	770	2459	1598	1454	209	535	154	531	725
ENSMUSG00000002416.14	Ndufb2	-0.9573	6.59821	4.68967	0.0476225	0.263063	1045	1069	874	808	656	380	1147	1450	1674	1507	671
ENSMUSG00000002428.13	Hltf	0.761294	3.52902	7.35146	0.0165692	0.182284	143	67	106	467	287	199	65	95	48	132	119
ENSMUSG00000002455.15	Prpf6	0.270954	5.49865	2.30605	0.15056	0.416578	533	393	578	949	731	859	311	607	203	522	682
ENSMUSG00000002458.14	Rgs19	-0.713837	3.57203	8.39431	0.0114507	0.160924	138	104	98	136	107	120	156	219	121	144	156
ENSMUSG00000002459.18	Rgs20	0.0501865	3.52019	0.0334865	0.85736	0.938302	100	51	92	296	242	251	86	175	52	155	168
ENSMUSG00000002475.17	Abhd3	-0.105847	5.33432	0.230722	0.638218	0.814863	554	397	515	627	519	409	415	578	237	548	534
ENSMUSG00000002477.6	Snrpd1	-0.244309	4.71596	0.564649	0.464521	0.697566	350	316	310	332	242	253	218	385	288	402	187
ENSMUSG00000002486.16	Tchp	0.298375	3.28564	0.84785	0.37236	0.62714	76	62	97	282	208	208	70	101	26	85	227
ENSMUSG00000002489.17	Tiam1	0.53024	6.21101	1.53665	0.234977	0.507677	480	300	729	2667	1986	1879	424	689	196	430	1908
ENSMUSG00000002496.11	Tsc2	-0.111617	6.31917	0.138543	0.715165	0.86199	596	403	710	1968	1668	1519	717	1003	362	656	2165
ENSMUSG00000002500.16	Rpl3l	0.658026	-1.2822	0.638611	0.437223	0.676366	3	8	3	5	2	2	2	5	3	0	0
ENSMUSG00000002504.16	Slc9a3r2	-0.536021	5.60481	6.33521	0.0242753	0.208527	404	507	506	693	543	501	671	735	368	569	846
ENSMUSG00000002524.18	Puf60	-0.342186	7.02076	2.14412	0.164647	0.432927	1409	1449	1584	1620	1301	1428	1408	2113	971	1644	1923
ENSMUSG00000002546.18	Golga2	-0.0198194	6.2738	0.00892261	0.926048	0.96874	730	557	815	1653	1189	1592	692	993	432	676	1667
ENSMUSG00000002550.17	Uck1	-0.23741	5.4002	1.48919	0.241988	0.513784	449	410	545	593	490	562	435	693	279	524	617
ENSMUSG00000002565.17	Scin	1.11475	-1.42819	2.21081	0.158654	0.42663	2	0	3	11	3	6	0	1	0	3	3
ENSMUSG00000002578.19	Ikzf4	0.76684	3.3208	1.90294	0.188837	0.460789	42	31	68	392	283	350	42	88	29	30	247
ENSMUSG00000002580.8	Mien1	-0.702988	5.69681	3.75659	0.0724991	0.311171	635	600	520	439	390	303	519	1022	573	875	491
ENSMUSG00000002588.14	Pon1	0.983608	-1.8613	1.02356	0.328407	0.589923	6	0	2	3	1	0	0	1	0	2	1
ENSMUSG00000002602.17	Axl	0.32436	6.00101	2.80571	0.115543	0.373077	595	467	807	1524	1031	1621	564	766	370	578	812
ENSMUSG00000002603.16	Tgfb1	-0.204673	2.50384	0.441946	0.516711	0.736391	32	44	44	106	83	135	70	75	53	35	82
ENSMUSG00000002608.9	Ccdc97	-0.295889	5.22624	1.22495	0.286572	0.554859	281	215	289	833	671	685	466	465	207	300	922
ENSMUSG00000002617.15	Zfp40	-0.404229	3.32105	0.878864	0.364001	0.619764	60	98	89	319	87	91	150	64	157	86	76
ENSMUSG00000002625.11	Akap8l	0.206901	6.83143	0.596732	0.452345	0.687833	1175	718	1327	3277	2551	1527	658	1842	416	1198	2156
ENSMUSG00000002633.5	Shh	0.500291	1.67677	1.69383	0.213573	0.487274	20	19	26	124	81	52	22	36	8	21	58
ENSMUSG00000002635.12	Pdcd2l	-0.514618	3.71458	3.37812	0.0868256	0.334644	141	140	156	139	114	126	160	216	128	173	144
ENSMUSG00000002658.10	Gtf2f1	0.246897	5.34959	1.6661	0.21716	0.490792	499	397	563	761	504	808	291	545	265	497	423
ENSMUSG00000002660.9	Clpp	-0.810428	5.78437	3.6468	0.0763432	0.318405	585	692	582	323	298	366	657	971	768	802	459
ENSMUSG00000002661.15	Alkbh7	-0.819126	4.03197	4.85313	0.0443814	0.257016	159	181	199	133	104	89	213	290	200	230	169
ENSMUSG00000002664.3	Pspn	-0.943019	-1.94139	1.49008	0.241855	0.513766	0	1	1	3	1	0	2	2	0	3	1
ENSMUSG00000002668.9	Dennd1c	0.781536	0.695266	1.78284	0.202566	0.476313	7	5	7	38	24	84	5	18	5	7	26
ENSMUSG00000002679.15	Med6	-0.139058	3.59349	0.168828	0.687217	0.845746	164	146	137	157	141	116	107	158	129	180	68
ENSMUSG00000002688.9	Prkd1	-0.102586	2.65381	0.133862	0.71979	0.86419	89	47	56	124	90	82	65	93	18	94	96
ENSMUSG00000002699.14	Lcp2	2.07482	1.96788	23.8404	0.000224609	0.0217713	35	17	51	122	91	200	9	26	10	13	17
ENSMUSG00000002718.15	Cse1l	0.200764	5.49236	0.683137	0.422019	0.664766	704	424	614	884	652	508	346	561	315	649	352
ENSMUSG00000002728.15	Naa20	-0.393263	5.94106	0.964118	0.342393	0.601906	738	785	713	682	461	553	622	761	880	873	317
ENSMUSG00000002731.7	Prkra	-0.316839	4.14192	0.760927	0.397378	0.646771	243	223	220	176	149	130	141	277	189	280	143
ENSMUSG00000002732.15	Fkbp7	0.316395	1.40001	0.470545	0.503653	0.72717	45	36	39	37	19	27	22	27	26	27	8
ENSMUSG00000002733.9	Plekha3	-0.130221	4.95682	0.363136	0.55616	0.763791	406	284	384	552	376	350	282	463	233	466	311
ENSMUSG00000002741.10	Ykt6	-0.248557	6.56245	1.22721	0.286146	0.554769	1138	997	1157	1287	900	1208	899	1445	821	1162	1263
ENSMUSG00000002748.8	Baz1b	0.609702	6.70651	4.05275	0.0632223	0.292907	891	587	1049	3864	2831	2114	657	1170	324	891	1723
ENSMUSG00000002763.17	Pex6	-1.04957	5.96591	14.0537	0.00207027	0.0789046	522	502	429	781	660	416	961	914	969	654	874
ENSMUSG00000002767.14	Mrpl2	-0.613145	5.10927	2.49853	0.135705	0.398852	363	421	455	236	204	287	475	542	414	405	330
ENSMUSG00000002768.9	Mea1	-0.761084	6.25968	3.48683	0.0823892	0.327596	897	896	869	530	448	440	844	1362	977	1247	664
ENSMUSG00000002769.10	Gnmt	0.328024	0.97159	0.453361	0.511426	0.732689	12	33	40	24	7	32	16	25	6	23	19
ENSMUSG00000002771.13	Grin2d	-0.106044	4.29071	0.0517919	0.82318	0.920839	93	88	107	565	402	500	252	150	83	89	596
ENSMUSG00000002778.15	Kdelr1	-0.476947	5.80713	4.29475	0.0566726	0.28067	608	583	608	676	550	595	712	872	485	677	800
ENSMUSG00000002781.20	Tmem143	-0.61523	4.35904	8.93735	0.00952238	0.150499	216	167	173	300	268	188	273	300	201	228	341
ENSMUSG00000002791.18	Pdxk-ps	0.199941	-2.06326	0.0487668	0.82833	0.923704	0	2	1	2	0	2	2	1	0	0	1
ENSMUSG00000002797.10	Ggct	0.0531387	3.87817	0.0448902	0.835181	0.927044	179	164	189	250	190	190	113	203	127	202	109
ENSMUSG00000002799.7	Jag2	-0.347547	4.9681	2.35156	0.146874	0.41218	241	241	273	552	445	581	388	399	204	265	723
ENSMUSG00000002803.15	Btbd6	-0.617056	5.89789	4.28524	0.0569142	0.28088	576	684	733	488	470	544	735	1031	568	764	848
ENSMUSG00000002804.5	Nudt14	-0.512806	3.02772	1.30901	0.271273	0.540162	116	98	100	77	45	43	89	122	98	130	49
ENSMUSG00000002808.8	Epdr1	-0.32009	6.87952	1.47232	0.244546	0.516141	1684	1146	1427	1545	1249	965	1091	2000	918	1773	1451
ENSMUSG00000002812.5	Flii	-0.115146	5.60229	0.176524	0.680591	0.841592	389	330	448	1132	891	865	603	540	220	355	1174
ENSMUSG00000002814.16	Top3a	0.361051	2.67995	1.39726	0.256372	0.526423	46	39	82	162	111	169	43	72	26	43	132
ENSMUSG00000002820.7	Atg4d	-0.410642	5.33449	4.09993	0.0618778	0.291235	346	422	404	675	514	427	456	593	400	478	539
ENSMUSG00000002825.9	Qtrt1	0.0118081	3.03068	0.00351982	0.953508	0.980308	86	66	78	194	121	136	60	125	42	96	134
ENSMUSG00000002831.15	Plin4	4.06828	5.09421	74.2825	4.68616e-07	0.00284823	358	425	644	921	765	1964	14	52	15	23	111
ENSMUSG00000002833.12	Hdgfl2	-0.0396127	5.8373	0.0505729	0.825235	0.922179	552	438	662	1140	894	1030	486	842	327	570	1082
ENSMUSG00000002835.10	Chaf1a	-0.192701	3.89814	0.675394	0.424602	0.666827	154	163	176	211	184	194	157	170	156	141	203
ENSMUSG00000002844.10	Adprh	-0.723758	6.53373	8.17277	0.0123641	0.164441	951	817	985	930	884	867	1471	1405	883	1111	1354
ENSMUSG00000002845.15	Tmem39a	0.293568	2.898	1.29691	0.273405	0.542454	70	42	85	224	156	127	49	111	28	90	96
ENSMUSG00000002846.10	Timmdc1	-0.452475	3.83141	3.45089	0.0838253	0.329509	162	147	151	173	158	132	132	249	130	208	177
ENSMUSG00000002847.8	Pla1a	2.31772	1.75219	24.8592	0.000184719	0.0200501	19	22	35	139	64	183	7	12	9	11	15
ENSMUSG00000002870.9	Mcm2	-0.291161	2.69016	0.804343	0.384575	0.636303	52	40	53	84	65	189	74	102	62	46	90
ENSMUSG00000002871.15	Tpra1	-0.277543	4.80092	2.92235	0.108855	0.364875	250	234	308	516	392	380	279	452	188	306	495
ENSMUSG00000002881.15	Nab1	0.590569	4.14509	6.5309	0.0225129	0.201623	175	111	183	586	380	418	101	180	87	168	239
ENSMUSG00000002885.15	Adgre5	-0.427752	3.15879	3.53243	0.0806094	0.325185	84	54	93	125	104	167	108	123	51	107	186
ENSMUSG00000002897.6	Il17ra	1.14151	4.00624	6.97163	0.01906	0.191151	93	69	124	587	368	759	66	150	52	88	202
ENSMUSG00000002900.18	Lamb1	0.340739	3.63362	0.952494	0.345228	0.604036	91	52	113	403	292	297	79	122	49	98	283
ENSMUSG00000002908.18	Kcnn1	-0.841461	4.39349	8.2422	0.0120691	0.163189	232	180	195	190	212	149	270	343	288	257	255
ENSMUSG00000002910.12	Arrdc2	1.32666	4.56256	30.9842	6.3112e-05	0.0114349	275	340	475	517	346	625	107	168	64	177	215
ENSMUSG00000002930.7	Ppp1r17	0.070203	5.705	0.0348491	0.854522	0.936986	514	796	1004	644	460	442	425	729	283	934	409
ENSMUSG00000002944.16	Cd36	1.46022	-0.432633	7.99019	0.0131805	0.168563	12	2	8	18	12	17	2	1	1	6	6
ENSMUSG00000002948.20	Map2k7	-0.169839	6.19132	0.636133	0.438094	0.677081	660	539	742	1417	1138	1322	787	888	455	606	1650
ENSMUSG00000002949.16	Timm44	0.182719	5.34474	0.764794	0.396212	0.645839	478	315	634	861	570	661	222	626	206	518	606
ENSMUSG00000002957.12	Ap2a2	-0.375516	7.53461	3.58721	0.0785316	0.321693	1735	1633	2164	2728	2294	2482	2210	2467	1516	1876	3496
ENSMUSG00000002963.18	Pnkp	-0.356545	4.26021	3.04217	0.102468	0.356685	177	175	245	302	206	236	217	283	184	206	259
ENSMUSG00000002968.10	Med25	-0.199195	6.02495	1.4275	0.251518	0.521598	600	536	796	1101	947	995	699	969	472	661	1048
ENSMUSG00000002980.15	Bcam	-0.729708	4.25941	6.82038	0.0201708	0.19366	157	200	177	218	131	242	291	247	211	190	332
ENSMUSG00000002981.11	Clptm1	-0.652577	7.54823	6.5196	0.0226105	0.201736	1859	1778	1940	1928	1751	2076	2696	2659	2003	2003	2878
ENSMUSG00000002983.18	Relb	0.548771	3.10675	3.13771	0.0976968	0.349952	61	54	93	213	141	313	54	121	53	63	80
ENSMUSG00000002984.18	Tomm40	-0.545845	5.99402	6.31219	0.024493	0.209404	688	560	721	765	593	746	799	1104	543	840	865
ENSMUSG00000002985.17	Apoe	-0.455397	10.8996	1.75416	0.206031	0.479695	19161	24169	24150	19697	17136	15414	22299	30465	20735	23985	19219
ENSMUSG00000002996.18	Hbp1	0.426752	4.65344	4.1892	0.0594256	0.285946	283	235	341	686	413	421	129	375	110	316	279
ENSMUSG00000002997.16	Prkar2b	-0.304224	5.36117	1.42181	0.252422	0.522226	625	335	393	738	545	304	457	650	342	561	436
ENSMUSG00000003031.15	Cdkn1b	0.299633	5.42795	1.76855	0.204283	0.477828	374	322	523	1243	901	724	433	420	174	427	687
ENSMUSG00000003032.9	Klf4	0.936221	2.76585	8.27325	0.0119398	0.162321	45	77	93	212	98	206	47	70	13	63	59
ENSMUSG00000003033.16	Ap1m1	-0.192638	5.47992	1.08136	0.315572	0.579976	426	320	473	915	703	680	411	698	224	520	903
ENSMUSG00000003037.17	Rab8a	-0.402227	5.42857	2.54503	0.132391	0.394777	463	464	476	523	407	533	427	643	487	551	477
ENSMUSG00000003038.16	Hmgn2	-0.35288	6.35068	1.68924	0.214162	0.48812	1016	805	891	1021	667	1173	750	1373	797	1259	727
ENSMUSG00000003039.10	Fam32a	-0.293053	6.51385	0.853572	0.370796	0.625581	1196	1129	1188	808	786	903	815	1443	886	1263	1004
ENSMUSG00000003051.14	Elf3	0.461898	-1.33974	0.640871	0.437591	0.676803	2	1	5	2	8	4	1	4	1	1	4
ENSMUSG00000003062.14	Stard3nl	-0.268094	5.02505	1.85673	0.193975	0.466498	395	261	371	608	427	336	347	567	202	454	411
ENSMUSG00000003068.18	Stk11	-0.669204	6.46687	6.39018	0.0237646	0.206033	700	935	877	1014	882	944	1130	1183	1167	997	1184
ENSMUSG00000003070.7	Efna2	-0.589644	2.60736	6.19612	0.0256257	0.211935	58	56	60	77	69	59	74	100	59	64	95
ENSMUSG00000003072.16	Atp5d	-0.822617	7.54077	6.5469	0.0223755	0.201623	1945	1892	1986	1502	1382	1350	2496	3444	2038	2772	2095
ENSMUSG00000003099.12	Ppp5c	-0.441335	6.40088	4.90735	0.0433641	0.255356	931	753	979	1114	882	1004	976	1373	619	1046	1437
ENSMUSG00000003119.15	Cdk12	1.04527	4.12171	3.99709	0.064853	0.296593	98	44	147	784	491	622	58	143	28	123	320
ENSMUSG00000003123.16	Lipe	0.00686724	3.92474	0.0015455	0.969182	0.987969	161	133	171	316	229	236	151	184	104	135	251
ENSMUSG00000003131.8	Pafah1b2	0.00398251	7.13614	0.000393632	0.984444	0.995341	1640	1007	1674	2592	2339	2405	1166	1822	729	1466	2900
ENSMUSG00000003134.11	Tbc1d8	0.193202	4.48083	0.694694	0.41821	0.6622	224	125	228	566	503	415	142	325	105	238	384
ENSMUSG00000003135.16	Cnot11	-0.200507	4.90799	0.976268	0.339466	0.600284	384	278	360	421	332	414	317	440	217	393	383
ENSMUSG00000003153.11	Slc2a3	0.0854432	6.67748	0.147813	0.706263	0.857093	1058	675	1198	2333	1928	1770	800	1307	506	889	2256
ENSMUSG00000003154.16	Foxj2	0.103573	4.81862	0.0784227	0.783437	0.898708	177	130	273	768	638	646	213	292	85	245	794
ENSMUSG00000003161.16	Sri	-0.0579383	5.14328	0.121739	0.732215	0.870821	434	252	386	696	520	580	280	550	246	453	466
ENSMUSG00000003166.21	Dgcr2	-0.283127	7.14836	2.05243	0.173356	0.44351	1237	1231	1557	2432	2040	2054	1742	1763	1044	1307	2764
ENSMUSG00000003184.16	Irf3	-0.234165	4.67907	1.50298	0.239923	0.512065	244	219	287	517	432	241	243	415	213	291	351
ENSMUSG00000003190.13	Bcl2l12	-0.00541995	0.51416	0.000282249	0.986827	0.996601	8	17	11	30	22	17	9	23	7	16	17
ENSMUSG00000003198.11	Zfp959	0.705033	1.73869	3.68886	0.0748426	0.316091	44	19	56	114	50	49	17	34	5	45	36
ENSMUSG00000003199.17	Mpnd	-0.869395	6.51395	4.35012	0.0552886	0.277189	900	1164	823	650	549	582	1188	1340	1532	1016	891
ENSMUSG00000003200.11	Sh3gl1	-0.00276051	5.04656	0.000271033	0.987091	0.996697	351	263	438	679	471	513	290	509	178	398	485
ENSMUSG00000003206.8	Ebi3	0.0717019	-0.0506994	0.0244749	0.877859	0.947751	11	7	9	8	8	23	3	21	5	8	8
ENSMUSG00000003208.10	Yju2	-0.264825	2.94741	1.85481	0.194192	0.466761	60	69	77	159	105	107	70	104	55	114	116
ENSMUSG00000003226.8	Ranbp2	1.01148	5.71905	11.846	0.00383641	0.107575	547	314	651	2499	1335	940	340	286	276	460	417
ENSMUSG00000003227.5	Edar	-0.2188	-0.879242	0.126408	0.72735	0.868388	3	0	2	10	10	7	2	8	3	1	10
ENSMUSG00000003228.10	Grk5	-0.138155	4.3616	0.716966	0.411019	0.656928	186	153	231	435	318	321	207	252	143	244	335
ENSMUSG00000003233.13	Dvl3	0.449096	4.90965	0.60424	0.449571	0.685252	131	83	188	1124	841	932	168	206	76	123	983
ENSMUSG00000003234.17	Abcf3	-0.311703	6.18193	1.27864	0.27667	0.545649	874	841	940	777	659	764	758	971	736	831	987
ENSMUSG00000003235.14	Eif2b5	-0.577659	6.06446	3.87821	0.068506	0.303478	720	733	747	667	591	597	743	1001	849	801	812
ENSMUSG00000003269.18	Cyth2	-0.279758	5.98656	1.12762	0.305803	0.571592	763	756	785	783	631	602	649	1007	574	775	741
ENSMUSG00000003271.18	Sult2b1	-0.29995	3.03473	1.63438	0.221359	0.494877	96	71	94	157	92	75	93	106	78	93	103
ENSMUSG00000003273.15	Car11	-0.836989	7.06975	6.39899	0.0236839	0.205899	1366	1305	1243	1593	1175	787	1528	2164	2115	1741	1326
ENSMUSG00000003279.18	Dlgap1	0.265686	7.7403	1.59706	0.226435	0.499856	2101	1297	2591	6237	4645	3457	1653	2457	1244	2183	3208
ENSMUSG00000003282.10	Plag1	0.541813	1.36275	2.72555	0.120429	0.379173	23	11	30	92	60	37	19	24	12	17	35
ENSMUSG00000003283.16	Hck	2.28615	2.62122	32.2568	5.14582e-05	0.010494	52	27	124	229	127	283	14	21	18	25	24
ENSMUSG00000003299.11	Mrpl4	-0.500224	5.50873	5.66517	0.0316506	0.227136	448	422	538	551	441	563	518	810	388	584	642
ENSMUSG00000003308.16	Keap1	-0.329173	6.26831	2.85264	0.112794	0.369864	759	749	904	1102	860	1058	831	1151	705	832	1140
ENSMUSG00000003309.15	Ap1m2	0.604279	-0.10525	1.57254	0.229853	0.503028	10	5	5	38	9	15	5	9	3	2	15
ENSMUSG00000003316.15	Glg1	0.226324	7.08711	0.355667	0.5602	0.766602	945	627	1276	3755	3471	3154	985	1462	460	864	3744
ENSMUSG00000003341.10	Atp8b3	0.976745	0.648019	3.6999	0.0744547	0.31548	6	9	13	89	23	32	10	8	12	6	10
ENSMUSG00000003344.15	Btbd2	-0.374333	6.20095	4.18875	0.0594374	0.285946	698	691	738	1234	972	876	880	1074	555	755	1356
ENSMUSG00000003345.17	Csnk1g2	-0.986295	7.6665	7.95522	0.0133439	0.169022	1817	2135	1695	1763	1555	1357	2958	3128	3215	2373	2187
ENSMUSG00000003346.15	Abhd17a	-1.06768	7.56144	5.73313	0.0307939	0.225184	1726	2170	1750	1108	1063	964	2763	3008	3296	2237	1622
ENSMUSG00000003348.11	Mob3a	-0.319054	3.9365	2.40139	0.142964	0.408116	134	166	165	218	167	224	164	230	126	163	245
ENSMUSG00000003352.15	Cacnb3	-0.812252	7.34063	14.1838	0.00199968	0.0774343	1605	1324	1416	1804	1853	1372	2076	3014	1518	1958	3030
ENSMUSG00000003354.7	Ccdc65	-0.0583675	1.96939	0.037355	0.849449	0.934207	69	23	31	68	64	46	29	62	16	51	64
ENSMUSG00000003355.8	Fkbp11	0.111928	0.198606	0.0808723	0.780175	0.897059	5	5	15	29	11	25	10	9	8	13	10
ENSMUSG00000003360.16	Ddx23	-0.00425662	6.01306	0.000646237	0.980069	0.993343	650	553	719	1387	1069	988	525	885	390	670	1194
ENSMUSG00000003363.16	Pld3	-0.696545	8.46422	6.07729	0.0268489	0.21608	4239	3242	3892	3296	3201	2606	4399	6150	3301	4322	6111
ENSMUSG00000003378.10	Grik5	-0.606126	7.16441	9.83594	0.00709501	0.135983	1121	1109	1308	2308	1888	1796	1881	2087	1416	1390	2708
ENSMUSG00000003379.8	Cd79a	-0.382453	-0.880088	0.427058	0.523755	0.741689	1	5	8	7	5	1	6	4	1	5	9
ENSMUSG00000003380.12	Rabac1	-0.742695	7.76539	2.00769	0.177815	0.448598	2273	3144	2719	1042	943	973	2573	3191	3359	3080	1583
ENSMUSG00000003382.19	Etv3	0.524791	4.96428	3.34488	0.0882388	0.336524	253	182	310	934	611	963	213	345	132	220	537
ENSMUSG00000003402.15	Prkcsh	-0.332329	5.50364	2.98796	0.1053	0.36029	387	308	407	892	700	749	578	624	309	428	879
ENSMUSG00000003410.9	Elavl3	-0.00286232	7.25784	7.19863e-05	0.993347	0.997796	912	782	1166	4616	3556	3032	1333	1764	901	1000	3838
ENSMUSG00000003411.11	Rab3b	-0.47855	5.24583	4.18359	0.0595762	0.286204	442	332	431	509	403	377	517	731	214	434	606
ENSMUSG00000003418.12	St8sia6	0.353788	1.54453	1.20616	0.290154	0.558043	24	17	26	72	55	75	20	19	24	33	29
ENSMUSG00000003420.9	Fcgrt	-1.01056	4.7515	7.91025	0.0135574	0.169497	251	296	239	176	172	178	414	407	357	383	327
ENSMUSG00000003421.14	Nosip	-0.220508	5.4759	1.14275	0.302699	0.569198	499	433	604	627	451	599	443	652	360	534	624
ENSMUSG00000003423.16	Pih1d1	-0.844302	4.34381	4.13149	0.0609974	0.289569	236	217	236	143	122	93	231	356	290	293	189
ENSMUSG00000003429.12	Rps11	-1.08986	7.88951	5.29846	0.036783	0.239033	2044	2919	2080	1375	1089	1304	4365	4336	3502	2664	1628
ENSMUSG00000003435.10	Supt5	-0.0540927	6.62858	0.0772981	0.784953	0.899303	880	765	1014	2114	1646	1828	864	1204	633	941	2066
ENSMUSG00000003436.12	Dll3	-0.447011	0.669614	2.00639	0.177947	0.448657	9	14	16	29	18	16	11	17	18	20	24
ENSMUSG00000003437.15	Paf1	0.343824	4.98165	1.8457	0.195227	0.467926	350	199	408	808	594	639	181	460	96	350	547
ENSMUSG00000003438.18	Timm50	-0.723717	5.21959	4.24691	0.0579011	0.282969	416	446	365	308	259	265	490	586	456	514	387
ENSMUSG00000003444.9	Med29	-0.479046	3.86671	3.7039	0.0743146	0.315275	169	154	149	184	130	149	149	249	133	213	177
ENSMUSG00000003452.16	Bicd1	0.639142	3.98599	4.616	0.0491736	0.266121	128	99	153	715	347	300	120	101	95	133	197
ENSMUSG00000003458.13	Ncstn	0.00393541	5.36687	0.000236058	0.987953	0.996969	371	264	420	860	658	974	357	571	173	356	957
ENSMUSG00000003464.14	Pex19	-0.247464	6.43676	1.29077	0.274497	0.543586	957	969	1052	1101	965	1061	877	1254	697	1040	1288
ENSMUSG00000003469.10	Phyhip	-0.361467	8.55206	3.13166	0.0979911	0.349952	3795	2412	4338	6584	5181	5187	4606	5277	2828	3455	7371
ENSMUSG00000003476.17	Crhr2	-0.992266	1.05347	13.5714	0.00235797	0.0848157	16	11	17	22	16	26	25	36	17	24	46
ENSMUSG00000003477.6	Inmt	-0.417874	0.479354	0.622	0.443121	0.680174	16	23	10	12	8	9	4	23	20	13	17
ENSMUSG00000003484.5	Cyp4f18	3.05514	-0.564285	10.048	0.00663143	0.132878	1	3	10	6	3	49	1	1	1	0	2
ENSMUSG00000003500.14	Impdh1	-0.594463	5.1196	10.3545	0.0060214	0.127171	315	273	319	557	477	345	419	581	233	417	744
ENSMUSG00000003518.14	Dusp3	-0.360102	7.06833	3.40195	0.0858289	0.33278	1436	967	1372	2232	1880	1850	1153	2263	761	1683	2991
ENSMUSG00000003526.13	Prodh	0.125383	5.35338	0.265746	0.614038	0.801226	428	553	610	623	478	547	312	503	362	412	479
ENSMUSG00000003527.10	Ess2	-0.156255	4.79366	0.447675	0.514046	0.734878	315	294	390	379	254	389	317	389	186	281	432
ENSMUSG00000003528.16	Slc25a1	-0.806703	5.30361	8.36829	0.0115538	0.161333	388	385	334	322	309	473	601	604	441	467	569
ENSMUSG00000003531.16	Dgcr6	-0.833561	6.11548	3.08737	0.100176	0.352844	703	938	757	363	362	346	839	1036	1108	944	583
ENSMUSG00000003534.18	Ddr1	-0.486006	6.52863	6.62872	0.0216878	0.198546	763	683	813	1441	1193	1580	1109	1243	807	963	1839
ENSMUSG00000003541.7	Ier3	0.47211	3.5142	4.35364	0.0552021	0.276939	112	143	160	221	165	237	75	166	76	92	98
ENSMUSG00000003545.4	Fosb	1.96646	4.06209	8.5324	0.0109207	0.158684	49	32	96	1289	270	868	48	140	24	61	103
ENSMUSG00000003546.11	Klc4	-0.420758	4.43716	4.83912	0.0446489	0.257445	210	200	232	315	288	234	250	295	197	254	346
ENSMUSG00000003549.10	Ercc1	-0.153577	3.60447	0.697868	0.417173	0.661672	119	105	141	227	199	144	115	205	73	144	176
ENSMUSG00000003559.9	As3mt	-0.552079	3.40716	6.35862	0.0240562	0.20748	117	95	84	160	86	146	120	188	91	131	162
ENSMUSG00000003573.16	Homer3	-0.130275	6.29673	0.213336	0.651079	0.82228	555	1034	1339	1132	790	865	876	1033	499	1025	1069
ENSMUSG00000003575.14	Crtc1	-0.0843305	7.15012	0.0535685	0.820229	0.919197	811	749	1083	3771	3016	3149	1450	1465	682	877	4093
ENSMUSG00000003581.15	Rnf215	-0.40555	4.30254	5.09421	0.0400615	0.246736	187	148	219	316	276	245	251	292	136	214	355
ENSMUSG00000003585.14	Sec14l2	-0.411437	5.0937	4.29995	0.0565409	0.280419	401	322	356	498	357	379	363	503	294	406	581
ENSMUSG00000003604.15	Aven	-0.565389	3.62205	3.18772	0.0953062	0.346828	154	131	114	137	89	126	120	189	154	186	115
ENSMUSG00000003617.17	Cp	2.38554	4.70141	30.1561	7.23097e-05	0.0125234	162	116	301	1588	799	1007	64	90	46	123	110
ENSMUSG00000003623.5	Crot	1.01439	4.84984	12.4412	0.00323069	0.0999768	330	216	332	1291	706	493	152	256	143	295	137
ENSMUSG00000003644.18	Rps6ka1	-0.0821815	4.67736	0.125087	0.728717	0.869112	195	216	367	481	360	424	243	307	124	250	590
ENSMUSG00000003657.10	Calb2	-0.567108	6.74875	4.27023	0.0572983	0.281696	838	1250	1252	1214	1154	950	1636	1436	705	1410	1953
ENSMUSG00000003660.11	Snrnp200	0.133041	6.62067	0.336551	0.570811	0.773316	901	640	1046	2331	1793	2179	795	1107	520	866	2072
ENSMUSG00000003662.11	Ciao1	-0.228075	5.25737	0.913296	0.355041	0.611886	516	375	473	570	425	371	347	681	280	546	422
ENSMUSG00000003665.8	Has1	-0.0585345	0.588761	0.0302578	0.864333	0.941477	17	14	15	19	26	14	13	24	12	14	11
ENSMUSG00000003680.17	Taf6l	-0.625218	3.57799	4.43688	0.0531995	0.273678	134	133	121	104	107	99	136	205	119	171	149
ENSMUSG00000003721.15	Insig2	-0.0182726	5.16757	0.00697132	0.93461	0.971474	497	327	443	664	535	371	240	585	267	496	402
ENSMUSG00000003731.14	Kpna6	-0.0136739	6.44753	0.00443136	0.947842	0.977644	855	616	874	2021	1565	1505	842	1074	514	726	1806
ENSMUSG00000003746.17	Man1a	0.302242	4.27443	1.93392	0.18549	0.457124	225	146	248	541	355	275	169	180	143	238	162
ENSMUSG00000003752.10	Itpkc	0.315821	3.2667	1.52257	0.23703	0.509223	76	74	111	198	149	282	62	95	66	82	158
ENSMUSG00000003762.14	Coq8b	-0.342228	4.36417	2.87663	0.111419	0.368352	207	182	190	355	248	302	255	259	204	190	310
ENSMUSG00000003778.15	Brd8	0.628129	5.33027	4.85173	0.0444082	0.257016	382	225	493	1364	877	953	205	460	119	381	670
ENSMUSG00000003779.17	Kif20a	0.687178	-0.279272	2.05943	0.172671	0.442989	4	5	9	29	13	11	6	3	1	10	7
ENSMUSG00000003808.19	Farsa	0.0874045	4.92807	0.244338	0.62856	0.809677	298	238	393	620	450	602	245	433	162	321	507
ENSMUSG00000003809.15	Gcdh	-0.201883	4.75693	0.824563	0.378825	0.631926	350	258	311	466	353	247	229	430	227	378	306
ENSMUSG00000003810.14	Mast2	-0.34874	6.47819	2.32887	0.148697	0.414409	727	489	733	1836	1493	1624	1001	1247	628	768	2027
ENSMUSG00000003812.14	Dnase2a	-0.290718	3.92657	1.60915	0.224775	0.497635	128	162	171	232	174	218	131	229	171	140	217
ENSMUSG00000003813.16	Rad23a	-0.566336	5.46743	7.0222	0.0187045	0.190063	434	427	467	557	417	503	587	760	335	519	743
ENSMUSG00000003814.9	Calr	-0.407692	7.99996	2.32197	0.149258	0.415197	1864	1257	1740	6326	4965	3873	3835	3541	1791	2485	4397
ENSMUSG00000003824.13	Syce2	-0.099527	1.44174	0.088215	0.770708	0.891963	34	26	38	48	24	25	20	54	20	32	20
ENSMUSG00000003847.17	Nfat5	0.9644	5.63557	4.39443	0.05421	0.274691	352	136	447	2215	1493	1487	185	413	129	330	920
ENSMUSG00000003848.15	Nob1	0.0584253	4.5069	0.0862871	0.773151	0.893122	299	204	279	435	320	320	153	375	121	317	290
ENSMUSG00000003849.9	Nqo1	0.363596	2.56768	1.48407	0.242761	0.514267	73	75	109	88	62	83	30	75	28	76	75
ENSMUSG00000003863.19	Ppfia3	-0.842818	7.05357	14.9533	0.00163455	0.0695471	1059	1007	1036	1781	1659	1343	1775	1971	1599	1253	2696
ENSMUSG00000003865.17	Gys1	-0.387549	4.18096	3.58267	0.0787014	0.321961	160	138	145	326	279	274	221	263	105	183	396
ENSMUSG00000003868.15	Ruvbl2	-0.458332	4.2527	5.39577	0.0353319	0.235886	183	160	224	250	226	237	251	283	133	257	288
ENSMUSG00000003872.10	Lin7b	-0.997587	4.91226	5.34673	0.0360547	0.237311	388	305	290	160	167	120	324	588	385	536	336
ENSMUSG00000003873.12	Bax	-0.643016	5.3911	3.54931	0.0799623	0.32429	396	484	520	385	309	343	445	686	543	624	376
ENSMUSG00000003882.6	Il7r	2.67785	-0.488349	9.37321	0.00824236	0.143396	4	6	6	5	3	50	2	1	0	3	1
ENSMUSG00000003923.15	Tfam	0.0544992	4.88553	0.0474622	0.830602	0.924906	457	286	434	412	340	369	241	439	189	421	290
ENSMUSG00000003929.12	Zfp81	0.573482	3.644	3.50099	0.0818314	0.327181	119	57	142	561	236	233	89	83	84	125	136
ENSMUSG00000003934.6	Efnb3	-0.617497	7.24208	6.23293	0.02526	0.211538	1498	1521	1443	1728	1375	1780	2101	2251	1501	1448	2674
ENSMUSG00000003948.18	Mmd	-0.513746	7.09179	6.02649	0.0273925	0.217533	1690	907	1364	2152	1850	1234	1608	2450	1143	1848	1799
ENSMUSG00000003949.17	Hlf	0.418726	6.72417	2.09129	0.169596	0.43882	984	553	1120	3623	2651	1879	715	1134	438	820	2105
ENSMUSG00000003955.9	Fam162a	-0.652483	4.7489	2.03498	0.175078	0.445091	352	342	295	224	156	117	295	509	354	383	164
ENSMUSG00000003970.10	Rpl8	-0.809756	8.54936	3.17152	0.0960728	0.347764	3772	4906	4005	2390	1999	2239	4949	6141	5604	4963	2683
ENSMUSG00000003974.7	Grm3	-0.467696	4.46182	3.23152	0.0932702	0.343908	306	149	186	353	324	185	176	470	126	397	307
ENSMUSG00000003992.16	Ssbp2	0.105355	5.51744	0.257562	0.619499	0.803497	625	503	611	828	617	510	376	628	322	550	513
ENSMUSG00000004018.10	Fancl	-0.0756691	2.15026	0.0418256	0.840821	0.929964	74	42	49	82	56	24	35	60	42	65	29
ENSMUSG00000004031.14	Brinp2	-0.163747	6.20517	0.904421	0.35732	0.613679	922	567	885	1260	1042	967	714	1162	492	823	1173
ENSMUSG00000004032.11	Gstm5	-0.306509	7.47152	0.353231	0.56153	0.767497	2456	3034	2233	1248	943	825	1543	2672	2309	2425	1037
ENSMUSG00000004035.13	Gstm7	-0.477895	4.62173	2.92267	0.108838	0.364868	307	265	272	235	210	254	263	425	252	281	325
ENSMUSG00000004040.17	Stat3	1.30358	6.17646	7.45614	0.0159504	0.178478	380	272	594	2759	1823	3619	383	462	208	284	976
ENSMUSG00000004043.15	Stat5a	0.326073	1.76334	0.615535	0.445452	0.682329	33	18	27	77	37	121	26	28	8	29	76
ENSMUSG00000004044.10	Cavin1	-0.418378	4.74968	4.65424	0.0483611	0.264786	241	220	304	377	305	421	322	376	201	278	539
ENSMUSG00000004054.10	Map3k11	-0.594139	5.14341	6.17688	0.0258193	0.212473	302	312	362	398	340	537	473	486	409	359	516
ENSMUSG00000004056.16	Akt2	-0.912547	6.90109	23.9781	0.000218683	0.0216237	850	831	929	1762	1421	1220	1654	1894	1395	1544	1986
ENSMUSG00000004069.18	Dnaja3	-0.256566	5.78495	1.61898	0.223435	0.496677	655	549	670	770	637	640	585	850	388	664	844
ENSMUSG00000004070.16	Hmox2	-0.179262	6.25117	0.36473	0.555304	0.76324	1018	914	1025	871	686	805	742	1206	636	1076	676
ENSMUSG00000004071.14	Cdip1	-0.392817	8.08989	2.53183	0.133321	0.396247	3081	2799	3507	3278	2793	2625	3089	4357	2190	3448	3969
ENSMUSG00000004085.15	Map3k20	0.466518	2.80152	2.05309	0.173291	0.44351	61	36	58	221	174	156	25	91	36	59	117
ENSMUSG00000004096.10	Cwc15	0.0534262	5.22254	0.0488356	0.828211	0.923636	484	405	533	610	405	504	367	526	203	550	349
ENSMUSG00000004098.8	Col5a3	1.20694	2.18269	7.75336	0.0143339	0.172063	24	21	57	175	110	158	19	30	10	21	70
ENSMUSG00000004099.17	Dnmt1	0.00855565	5.08296	0.000669661	0.979711	0.993343	224	173	314	938	702	708	301	344	134	278	932
ENSMUSG00000004100.13	Ppan	0.225607	4.13463	1.04461	0.32365	0.586847	183	128	197	392	241	448	117	278	80	187	258
ENSMUSG00000004105.9	Angptl2	-0.710711	2.31046	6.16994	0.0258895	0.212697	31	30	34	84	46	95	49	56	51	53	128
ENSMUSG00000004110.18	Cacna1e	0.558834	7.287	2.77594	0.117329	0.375302	1875	685	1754	4897	4264	2872	596	1933	476	1829	2611
ENSMUSG00000004113.19	Cacna1b	0.529861	5.42904	0.908717	0.356214	0.612786	251	104	238	1721	1344	1198	220	418	95	202	1229
ENSMUSG00000004127.13	Trmt10a	0.268772	2.23926	1.02691	0.327642	0.58933	80	43	60	94	48	69	32	57	30	59	46
ENSMUSG00000004151.18	Etv1	0.603989	6.035	4.7388	0.04662	0.260608	587	342	883	2596	1579	1075	459	491	304	638	957
ENSMUSG00000004187.12	Kifc2	-0.205348	8.33261	0.697659	0.417241	0.661672	4096	3254	4207	4598	4187	2851	2873	5738	1970	3758	5419
ENSMUSG00000004207.15	Psap	-0.130535	10.2496	0.32148	0.579468	0.779129	11038	9539	14034	22769	18529	21286	12372	16245	6814	11354	26075
ENSMUSG00000004221.17	Ikbkg	0.289688	5.0843	2.00981	0.1776	0.44836	351	245	401	805	634	715	196	402	168	372	601
ENSMUSG00000004231.16	Pax2	0.362981	1.01258	0.31916	0.580825	0.780019	13	14	9	47	32	68	15	6	4	3	69
ENSMUSG00000004233.15	Wars2	0.546115	2.33021	4.52239	0.051231	0.269412	50	38	62	163	113	69	32	66	19	40	66
ENSMUSG00000004263.16	Atn1	0.075264	6.53372	0.0193411	0.891323	0.954196	393	301	603	2956	2271	2517	862	728	282	346	3263
ENSMUSG00000004264.18	Phb2	-0.51813	6.00923	4.11475	0.0614626	0.290597	697	669	755	722	521	691	782	1030	619	826	840
ENSMUSG00000004266.16	Ptpn6	1.13245	2.5887	10.7721	0.00529111	0.120297	42	41	64	200	108	247	27	42	33	42	45
ENSMUSG00000004267.17	Eno2	-0.420373	9.69729	3.35551	0.0877838	0.336179	9167	7578	9128	11721	10021	8815	10397	12119	6250	8783	15409
ENSMUSG00000004268.12	Emg1	-0.236868	4.88711	1.19873	0.291586	0.559512	356	235	360	527	358	359	189	478	260	476	354
ENSMUSG00000004270.14	Lpcat3	-0.477679	4.42225	3.92787	0.0669513	0.301095	213	226	250	236	194	257	239	317	212	263	313
ENSMUSG00000004285.13	Atp6v1f	-0.648648	6.73314	2.3562	0.146504	0.411882	1247	1307	1344	749	668	594	891	2059	1305	1825	879
ENSMUSG00000004296.15	Il12b	9.75928	2.29905	48.0887	3.34193e-05	0.00828588	13	8	141	225	135	279	0	0	0	0	0
ENSMUSG00000004317.15	Clcn5	0.375563	4.16665	2.84856	0.113029	0.36996	187	118	194	450	359	418	117	204	84	159	318
ENSMUSG00000004319.16	Clcn3	0.290917	7.15035	2.46944	0.13783	0.401341	1909	1142	1984	3368	2457	1947	1098	1769	777	1744	1621
ENSMUSG00000004328.16	Hif3a	2.74497	3.50889	20.1155	0.000482601	0.0338309	60	33	137	529	296	697	17	24	10	20	92
ENSMUSG00000004341.9	Gpx6	-0.133321	-0.393622	0.0597849	0.810293	0.913101	14	4	7	7	3	10	1	11	4	13	7
ENSMUSG00000004347.18	Pde1c	0.543378	3.84968	3.92474	0.0670479	0.301095	117	95	187	487	344	252	75	127	59	143	258
ENSMUSG00000004356.9	Utp20	0.645434	3.55444	2.97969	0.10574	0.360726	99	48	118	403	306	301	56	103	31	104	237
ENSMUSG00000004360.10	9330159F19Rik	1.04911	5.14227	7.85726	0.0138141	0.169999	331	125	350	1865	1053	688	150	310	117	271	437
ENSMUSG00000004364.15	Cul3	0.484288	5.99959	5.68254	0.0314291	0.226802	786	443	867	1989	1183	1074	503	519	443	646	663
ENSMUSG00000004366.5	Sst	-0.663362	6.36796	7.8623	0.0137894	0.169999	1010	675	839	928	797	749	1011	1684	732	1016	1195
ENSMUSG00000004371.16	Il11	0.93498	-0.796731	2.42687	0.141015	0.405342	1	1	6	25	6	10	3	3	1	2	6
ENSMUSG00000004383.19	Large1	-0.254759	6.65797	2.19265	0.160259	0.428602	1186	752	1145	1722	1439	1291	891	1609	675	1392	1643
ENSMUSG00000004393.11	Ddx56	-0.367682	4.98132	2.08722	0.169985	0.439261	382	333	400	334	274	363	336	503	252	424	439
ENSMUSG00000004394.13	Tmed4	-0.252506	6.34348	1.20209	0.290936	0.558995	953	861	1058	1057	859	914	754	1268	702	1066	1016
ENSMUSG00000004415.16	Col26a1	-0.552893	2.18837	4.89467	0.0435996	0.255597	37	30	43	79	71	43	51	60	42	40	100
ENSMUSG00000004446.13	Bid	0.664334	3.65141	10.1738	0.00637272	0.130752	133	123	156	268	202	366	77	138	66	100	141
ENSMUSG00000004451.15	Ralb	-0.0179422	4.62982	0.00860072	0.92739	0.968939	269	259	289	399	312	423	238	353	196	275	267
ENSMUSG00000004455.17	Ppp1cc	-0.18215	7.81497	0.674188	0.425006	0.666973	2630	2388	2864	3413	2751	2409	2200	3387	1794	2925	2718
ENSMUSG00000004460.18	Dnajb11	-0.166215	5.50516	0.91281	0.355165	0.611982	481	334	467	908	686	709	508	641	375	533	504
ENSMUSG00000004462.8	Tbccd1	-0.0100869	3.66739	0.00215847	0.963584	0.98538	161	103	175	233	188	148	99	211	61	177	170
ENSMUSG00000004473.11	Clec11a	-1.19875	2.25361	11.9978	0.00367037	0.105687	39	46	39	37	26	28	57	104	60	73	63
ENSMUSG00000004500.10	Zfp324	0.121851	3.85655	0.295337	0.59515	0.788157	110	109	150	356	327	237	145	182	113	111	181
ENSMUSG00000004508.7	Gab2	0.505351	4.94662	3.10258	0.0994191	0.352131	221	210	346	794	568	998	250	279	149	202	527
ENSMUSG00000004530.13	Coro1c	-0.246996	6.45495	1.67964	0.2154	0.489701	863	703	979	1289	1077	1655	947	1230	594	929	1639
ENSMUSG00000004535.13	Tax1bp1	0.729536	6.05839	10.9435	0.00502136	0.118629	797	491	973	2244	1207	1348	333	507	379	785	658
ENSMUSG00000004540.8	Psg17	2.9749	-1.78227	9.49467	0.00792175	0.142001	2	0	1	8	2	6	0	0	0	1	0
ENSMUSG00000004552.17	Ctse	0.57546	-2.10548	0.313876	0.58394	0.781795	0	3	0	2	1	1	0	2	1	0	0
ENSMUSG00000004558.16	Ndrg2	-0.214559	9.64037	0.887735	0.361661	0.618	8336	8827	8768	12050	8731	11606	8247	12236	6494	9809	9815
ENSMUSG00000004561.15	Mettl17	0.270985	3.9779	0.730631	0.406703	0.653889	126	64	163	554	384	266	128	195	62	124	306
ENSMUSG00000004562.17	Arhgef40	-0.0175003	4.64731	0.00373373	0.952118	0.979762	188	190	213	470	428	638	231	269	124	199	631
ENSMUSG00000004565.16	Pnpla6	-0.133096	5.54674	0.332902	0.572883	0.774936	448	327	454	1066	889	630	458	589	260	384	1125
ENSMUSG00000004567.17	Mcoln1	0.00369798	5.88256	0.000419854	0.983934	0.995254	620	467	825	1172	801	964	474	912	303	696	982
ENSMUSG00000004568.14	Arhgef18	0.0350226	5.19112	0.0115149	0.916029	0.964944	314	187	326	955	869	628	318	382	141	277	1014
ENSMUSG00000004591.17	Pkn2	0.70776	4.29647	7.55064	0.0154146	0.176421	209	119	220	803	418	380	147	140	115	191	174
ENSMUSG00000004609.12	Cd33	0.0727649	2.00506	0.0489457	0.828021	0.923547	42	28	44	54	37	121	22	52	21	56	63
ENSMUSG00000004610.5	Etfb	-0.720709	5.36464	3.06281	0.101414	0.354565	461	529	433	312	229	267	464	698	595	538	351
ENSMUSG00000004612.10	Nkg7	3.79597	-0.215038	9.44339	0.00805534	0.142551	0	0	6	12	13	76	2	0	0	1	1
ENSMUSG00000004626.15	Stxbp2	0.254785	4.26426	1.35186	0.263896	0.533088	188	114	220	578	350	367	126	246	101	177	340
ENSMUSG00000004630.19	Pcp2	-0.558176	5.98631	3.11997	0.0985619	0.350843	399	740	934	777	568	504	866	1069	536	975	627
ENSMUSG00000004631.16	Sgce	-0.153773	4.12028	0.586918	0.456013	0.690868	220	160	189	304	263	174	145	251	124	249	238
ENSMUSG00000004633.18	Chn2	0.389092	6.84631	2.18356	0.161069	0.429411	974	777	2097	2914	1993	2215	887	1153	366	1344	1945
ENSMUSG00000004637.16	Wwox	-0.289254	4.48571	2.32504	0.149008	0.414812	237	178	267	318	283	339	247	325	173	210	406
ENSMUSG00000004642.14	Slbp	0.0748645	4.05097	0.104182	0.751515	0.881226	242	139	247	292	161	252	142	201	112	231	179
ENSMUSG00000004655.6	Aqp1	-0.405308	3.03709	2.59405	0.129004	0.39099	74	92	48	120	118	110	98	106	74	85	137
ENSMUSG00000004661.16	Arid3b	0.100257	2.48096	0.0933503	0.764341	0.888437	40	26	45	193	115	96	34	84	27	45	116
ENSMUSG00000004665.11	Cnn2	-0.461247	3.40056	2.06966	0.171676	0.441915	82	100	80	114	79	261	132	156	112	125	112
ENSMUSG00000004667.19	Polr2e	-0.598159	5.52533	3.86261	0.0690034	0.304227	536	469	575	405	364	386	498	863	415	752	517
ENSMUSG00000004668.15	Abca13	1.18911	-1.95409	1.81844	0.198367	0.471003	1	0	3	1	4	2	0	0	0	1	2
ENSMUSG00000004677.18	Myo9b	0.455972	5.42988	1.13425	0.304437	0.570208	251	200	345	1501	1177	1115	220	464	112	295	1111
ENSMUSG00000004698.12	Hdac9	0.188494	4.0632	0.561246	0.465845	0.69853	171	85	163	499	404	240	129	201	78	214	250
ENSMUSG00000004707.15	Ly9	2.55855	-0.0326317	14.8908	0.00166117	0.0702463	7	5	8	13	24	55	0	3	1	3	5
ENSMUSG00000004709.15	Cd244a	5.44576	-0.187347	33.1969	4.44177e-05	0.0095388	6	2	10	25	17	52	1	0	0	0	0
ENSMUSG00000004730.16	Adgre1	-0.230042	2.06102	0.561358	0.465801	0.69851	52	40	45	56	33	66	30	60	44	59	38
ENSMUSG00000004748.6	Mtfp1	-0.596418	5.76015	3.23232	0.0932336	0.343881	676	625	607	488	458	310	627	937	536	751	694
ENSMUSG00000004768.15	Rab23	0.348336	4.29652	2.92004	0.108983	0.365123	217	143	242	577	391	295	146	219	84	206	314
ENSMUSG00000004771.13	Rab11a	-0.139421	6.30878	0.362362	0.556576	0.76414	1027	738	982	1319	1076	825	847	986	715	1054	750
ENSMUSG00000004788.12	Eif2b2	-0.373828	5.12341	1.83601	0.196336	0.468992	392	386	435	374	281	431	363	501	354	483	385
ENSMUSG00000004789.11	Dlst	-0.31913	7.06589	3.00484	0.104408	0.359451	1458	1269	1428	2037	1528	1818	1445	2049	1020	1600	2134
ENSMUSG00000004791.8	Pgf	-0.0804989	2.0772	0.0512848	0.824032	0.921519	31	47	49	49	29	110	55	53	30	36	49
ENSMUSG00000004798.15	Ulk2	-0.111776	6.2852	0.182371	0.675672	0.838635	1154	709	1025	1317	980	676	681	1185	594	1217	702
ENSMUSG00000004814.11	Ccl24	-0.127709	-2.04183	0.0196363	0.890503	0.953708	2	2	2	0	0	0	0	1	0	2	2
ENSMUSG00000004815.13	Dgkq	-0.0805959	5.45599	0.105373	0.750152	0.880549	400	309	486	909	781	729	436	566	173	388	1082
ENSMUSG00000004837.3	Grap	-0.78158	2.38264	5.80085	0.029967	0.222248	42	50	58	40	30	69	60	87	61	68	72
ENSMUSG00000004843.8	Chmp2b	-0.181183	5.36391	0.451843	0.512124	0.733197	617	386	524	606	475	367	481	558	325	580	372
ENSMUSG00000004846.11	Plod3	0.54986	5.05238	4.89652	0.0435652	0.255597	249	216	354	1113	755	801	260	325	166	256	459
ENSMUSG00000004849.15	Ap1s1	-1.04472	8.07213	4.74765	0.0464421	0.260366	2876	3111	2503	1423	1395	1109	3338	4412	4784	3643	2243
ENSMUSG00000004864.14	Mapk13	-0.0410272	0.283622	0.0123016	0.91322	0.963773	8	14	16	17	13	15	10	13	13	10	10
ENSMUSG00000004865.17	Srpk1	-0.0633904	5.50942	0.0911637	0.767028	0.889804	499	268	434	1098	846	700	279	689	278	571	862
ENSMUSG00000004872.16	Pax3	0.633666	0.102707	1.29249	0.27419	0.543215	1	5	23	22	19	23	3	5	4	14	13
ENSMUSG00000004880.12	Lbr	0.294145	3.72982	2.55452	0.131727	0.394246	137	93	171	328	227	267	96	163	92	140	143
ENSMUSG00000004885.6	Crabp2	0.236759	1.35412	0.788312	0.389229	0.640386	23	17	30	64	37	50	19	25	11	33	34
ENSMUSG00000004891.17	Nes	0.667992	3.77545	1.39142	0.257325	0.527321	42	55	59	370	175	846	126	111	61	85	179
ENSMUSG00000004892.14	Bcan	-0.628034	7.85069	9.4041	0.00815943	0.14289	2047	1740	2097	3824	3003	2426	3163	3138	2311	2313	4343
ENSMUSG00000004894.11	Hapln2	0.3249	5.49536	2.59567	0.128894	0.390889	441	420	517	944	619	1211	375	528	305	437	487
ENSMUSG00000004895.10	Prcc	-0.33399	5.24488	2.65777	0.124759	0.384638	407	386	451	495	448	427	412	613	283	477	552
ENSMUSG00000004896.17	Rrnad1	0.24074	4.84315	0.94494	0.347088	0.605407	244	194	320	851	592	507	172	401	115	286	562
ENSMUSG00000004897.17	Hdgf	-0.494412	7.05423	6.57271	0.0221559	0.201024	1297	1186	1374	1777	1570	1647	1609	2080	1220	1497	2097
ENSMUSG00000004902.8	Slc25a18	-0.606378	6.43583	3.602	0.0779816	0.320688	901	1025	1056	754	619	704	1079	1439	865	1182	1077
ENSMUSG00000004929.13	Thop1	-0.777669	5.43467	8.85998	0.00977281	0.15204	457	403	434	433	365	358	590	701	479	539	634
ENSMUSG00000004931.12	Apba3	-0.340508	4.30875	2.43036	0.14075	0.405135	180	214	183	365	295	171	233	335	144	229	276
ENSMUSG00000004933.18	Matk	-0.555952	7.069	3.79614	0.0711709	0.308892	1542	1383	1478	1772	1268	929	1410	2186	1624	1641	1629
ENSMUSG00000004934.15	Pias4	-0.421377	4.31852	5.06517	0.0405549	0.247871	175	157	240	353	217	258	260	295	160	210	320
ENSMUSG00000004936.9	Map2k1	-0.0801098	7.49612	0.212238	0.651913	0.822602	2110	1467	2124	3474	2924	2291	1820	2621	1228	1954	2614
ENSMUSG00000004937.7	Sgta	-0.445771	6.7568	5.00655	0.0415727	0.250857	1048	971	1316	1414	1197	1325	1295	1741	884	1236	1737
ENSMUSG00000004939.8	Nmrk2	3.03227	-0.803452	8.79295	0.00999591	0.153851	0	1	2	32	10	19	0	3	0	1	0
ENSMUSG00000004945.16	Tmem242	-0.753322	6.1117	2.41918	0.141599	0.405992	820	905	788	389	342	340	627	1173	1065	1108	504
ENSMUSG00000004947.16	Dtx2	-0.345442	3.31264	2.63804	0.126055	0.386114	78	76	111	142	114	194	104	144	80	101	181
ENSMUSG00000004951.11	Hspb1	0.88442	4.03913	4.04407	0.0634733	0.293506	85	102	91	514	405	713	154	133	90	110	85
ENSMUSG00000004952.14	Rasa4	0.929599	4.4263	10.5227	0.0057142	0.124534	137	158	249	725	474	717	127	172	87	157	258
ENSMUSG00000004961.8	Syt5	-0.829459	6.83669	5.75944	0.0304695	0.223646	1358	1134	1232	826	829	683	1528	2197	1251	1573	1385
ENSMUSG00000004980.17	Hnrnpa2b1	0.685937	7.38757	3.17463	0.0959251	0.347496	1511	582	1309	8185	4593	3288	967	1681	536	1544	2617
ENSMUSG00000004988.10	Fxyd4	0.322514	-1.83265	0.117824	0.736376	0.87352	0	0	0	4	6	2	1	0	0	1	4
ENSMUSG00000004994.13	Ccdc130	0.106753	3.00069	0.251312	0.623744	0.806613	110	64	83	155	126	128	60	120	35	97	120
ENSMUSG00000004996.10	Mri1	-0.00216623	3.17833	7.90661e-05	0.993028	0.997796	92	69	130	172	107	161	58	111	49	93	207
ENSMUSG00000005034.16	Prkacb	0.321599	7.97201	1.52803	0.236231	0.508564	2800	1452	2868	6595	5701	4653	2131	2770	915	2180	4831
ENSMUSG00000005043.14	Sgsh	-0.57843	2.7349	3.75977	0.0723912	0.311107	54	31	67	83	77	133	83	82	42	59	186
ENSMUSG00000005045.17	Chd5	-0.452438	7.3652	2.43337	0.140522	0.405067	1121	978	1231	3366	2848	2801	1857	1932	1232	1147	4807
ENSMUSG00000005054.8	Cstb	-0.258115	4.4808	0.522875	0.481221	0.709349	269	266	327	229	138	272	186	367	225	344	160
ENSMUSG00000005057.14	Sh2b2	0.224172	3.0336	0.663523	0.428611	0.669435	88	87	80	141	82	224	81	76	50	67	128
ENSMUSG00000005069.13	Pex5	-0.19196	5.15678	1.29644	0.273489	0.542454	347	266	371	704	589	515	347	513	218	391	686
ENSMUSG00000005078.17	Jkamp	-0.510639	5.57593	1.78634	0.202148	0.475997	630	586	483	495	397	303	448	722	646	720	340
ENSMUSG00000005087.18	Cd44	2.23028	2.981	12.7592	0.00295237	0.0961826	30	32	53	267	153	606	12	30	14	28	65
ENSMUSG00000005089.16	Slc1a2	0.266839	10.4559	0.870999	0.366094	0.621118	16490	7578	15531	36908	36784	19325	8650	18047	6298	15295	25418
ENSMUSG00000005102.14	Eif2ak4	0.478716	4.05708	5.25086	0.0375182	0.240951	165	123	197	474	332	355	104	185	73	150	268
ENSMUSG00000005103.13	Wdr1	0.290881	6.57135	1.33879	0.266118	0.535481	1029	567	1165	2021	1792	2307	580	1395	341	1027	1665
ENSMUSG00000005107.14	Slc2a9	0.287211	0.911311	0.414985	0.529598	0.745748	14	18	26	28	8	59	6	28	13	18	21
ENSMUSG00000005124.11	Ccn4	0.0672688	1.2166	0.0306307	0.863509	0.940805	15	16	8	67	49	44	18	36	9	18	41
ENSMUSG00000005125.14	Ndrg1	-0.756295	7.11708	9.19518	0.00873967	0.146394	1449	1261	1301	1542	1317	1204	1984	1983	1479	1512	2511
ENSMUSG00000005131.5	4930550C14Rik	0.0138739	-1.47008	0.000496815	0.982524	0.994729	4	1	1	4	2	5	0	2	6	2	0
ENSMUSG00000005142.11	Man2b1	-0.152567	4.89828	0.539325	0.474525	0.704815	266	237	326	575	442	512	328	427	141	279	625
ENSMUSG00000005148.9	Klf5	0.0524877	2.36403	0.0477973	0.830016	0.924705	50	26	58	105	89	108	43	68	33	45	84
ENSMUSG00000005150.17	Wdr83	-0.220214	4.03504	1.43034	0.251068	0.521303	181	116	157	352	215	249	134	282	123	237	195
ENSMUSG00000005161.16	Prdx2	-0.334398	7.60196	1.39931	0.25604	0.526152	2647	2030	2435	2221	1811	1837	1765	3407	1531	3084	2189
ENSMUSG00000005198.16	Polr2a	0.722251	5.80762	0.921669	0.352911	0.610372	161	100	276	2481	1510	2288	310	218	91	125	1876
ENSMUSG00000005202.3	Shbg	0.105926	-2.19481	0.0112535	0.916983	0.965083	1	0	1	0	0	3	1	0	1	0	1
ENSMUSG00000005204.13	Senp3	-0.367444	6.13777	3.34713	0.0881421	0.336483	664	713	776	1147	840	781	684	1159	700	847	898
ENSMUSG00000005220.11	Corin	0.43688	0.496133	1.96372	0.18234	0.454192	14	9	18	34	28	17	7	18	5	11	19
ENSMUSG00000005225.16	Plekha8	-0.0194767	4.08641	0.0116279	0.915619	0.964874	190	122	169	381	305	248	112	257	121	201	260
ENSMUSG00000005233.17	Spc25	-0.458371	-0.90147	0.618828	0.444262	0.681182	0	3	2	7	4	12	2	7	3	7	6
ENSMUSG00000005237.15	Dnah2	0.555682	1.44234	1.26856	0.278493	0.547259	12	14	21	83	88	55	10	24	8	12	69
ENSMUSG00000005251.16	Ripk4	0.318301	0.411079	0.653813	0.431935	0.672425	6	14	18	34	19	17	17	10	4	9	16
ENSMUSG00000005262.14	Ufd1	0.384551	5.44697	2.86154	0.112281	0.369419	535	386	681	953	659	774	219	632	163	567	599
ENSMUSG00000005267.14	Zfp287	0.459886	3.32725	4.52528	0.0511661	0.269213	128	65	108	301	201	178	58	127	47	109	124
ENSMUSG00000005268.21	Prlr	-0.192054	2.71402	0.348158	0.56432	0.769344	61	54	49	183	77	96	108	45	60	65	67
ENSMUSG00000005299.7	Letm1	-0.380504	6.33571	3.56329	0.0794307	0.322905	915	772	907	1060	851	1007	910	1213	631	970	1336
ENSMUSG00000005312.16	Ubqln1	0.120065	6.96797	0.339373	0.569219	0.77231	1516	862	1513	2770	2172	2081	990	1855	499	1612	1943
ENSMUSG00000005320.10	Fgfr4	1.40358	-0.888562	2.22653	0.157282	0.425081	0	0	1	24	11	14	4	0	1	1	4
ENSMUSG00000005338.15	Cadm3	-0.0816305	8.61302	0.0898222	0.768694	0.890728	2961	2311	4082	9389	7365	7364	4029	4452	2169	2996	9458
ENSMUSG00000005354.17	Txn2	-0.624347	6.90959	4.44993	0.0528935	0.273637	1276	1339	1295	1216	959	1051	1274	2032	1393	1739	1368
ENSMUSG00000005357.10	Slc1a6	-0.192935	5.3526	0.562189	0.465477	0.698246	325	531	614	542	436	449	392	542	329	518	592
ENSMUSG00000005360.15	Slc1a3	0.81077	8.7218	7.03308	0.018629	0.18987	3951	2255	6191	15278	10333	9282	2167	4907	1072	4284	5170
ENSMUSG00000005362.15	Crbn	0.159991	5.6157	0.228369	0.639923	0.815732	749	561	775	858	530	448	419	471	465	692	282
ENSMUSG00000005370.5	Msh6	0.391706	3.76929	4.06784	0.0627885	0.292508	163	102	159	358	275	233	92	169	58	142	198
ENSMUSG00000005371.16	Fbxo11	0.745799	5.6224	10.5576	0.00565275	0.123971	590	309	593	1723	1124	1005	318	380	198	505	607
ENSMUSG00000005373.14	Mlxipl	0.0965822	1.004	0.0627724	0.805713	0.910379	13	7	18	59	53	22	18	18	11	15	37
ENSMUSG00000005374.14	Tbl2	-0.0300462	4.69305	0.0187217	0.893066	0.954867	217	180	275	570	451	494	221	332	130	245	578
ENSMUSG00000005378.18	Bud23	-0.400621	4.26557	3.98732	0.0651443	0.297048	220	156	201	316	244	200	213	336	173	238	221
ENSMUSG00000005397.9	Nid1	0.885035	3.18023	2.92945	0.108463	0.36442	44	25	54	327	279	349	47	78	25	42	170
ENSMUSG00000005410.7	Mcm5	-0.638565	2.78227	7.49249	0.0157417	0.178432	50	39	74	86	70	125	79	101	63	79	136
ENSMUSG00000005413.9	Hmox1	2.84469	3.95019	11.3228	0.00447838	0.114267	37	15	91	443	224	1624	41	57	11	36	53
ENSMUSG00000005417.18	Mprip	-0.0535794	8.29097	0.0589628	0.811574	0.91363	2551	2102	3055	7143	6313	5535	2706	3966	1934	3111	6426
ENSMUSG00000005442.14	Cic	0.0715208	6.95799	0.0264079	0.873171	0.94529	642	485	850	3722	2865	3358	1149	1096	554	654	3679
ENSMUSG00000005447.13	Pafah1b3	-0.986579	4.09061	4.08168	0.0623939	0.292114	169	213	176	85	71	84	273	249	268	204	145
ENSMUSG00000005465.10	Il27ra	0.387738	-0.447922	0.477496	0.500568	0.724641	4	2	5	11	6	28	7	4	1	6	9
ENSMUSG00000005469.11	Prkaca	-0.506084	7.07149	5.82917	0.0296288	0.221478	1350	1096	1312	1890	1619	1773	1735	1947	903	1340	3068
ENSMUSG00000005470.9	Asf1b	-0.197308	0.265092	0.187786	0.671199	0.835363	9	6	17	11	11	26	4	12	17	10	16
ENSMUSG00000005481.19	Ddx39a	0.0875772	3.71205	0.19889	0.662264	0.829827	169	90	156	275	182	237	91	197	67	165	195
ENSMUSG00000005483.11	Dnajb1	0.543933	5.5842	3.88199	0.0683861	0.303441	465	321	476	2231	990	670	286	680	267	456	438
ENSMUSG00000005493.16	Msh4	2.73174	-1.90698	9.748	0.00729813	0.13741	1	4	1	3	2	3	0	1	0	0	0
ENSMUSG00000005501.15	Usp40	0.987579	3.83163	5.6935	0.0312902	0.226475	118	54	112	693	429	336	47	138	37	120	204
ENSMUSG00000005503.9	Evx1	-0.0851291	-0.381463	0.0128038	0.911474	0.963074	8	16	5	7	5	2	11	4	7	0	11
ENSMUSG00000005505.13	Kbtbd4	-0.210724	4.90676	1.04253	0.324114	0.587199	380	254	404	462	363	329	286	510	212	393	377
ENSMUSG00000005506.17	Celf1	0.453099	7.04304	1.36684	0.261382	0.530649	885	517	1160	5038	3888	2672	908	1242	550	816	2920
ENSMUSG00000005510.10	Ndufs3	-0.329012	6.35604	1.07516	0.316915	0.581249	1072	910	1124	881	682	735	751	1384	787	1243	726
ENSMUSG00000005514.15	Por	-0.305028	5.80235	2.13472	0.165514	0.434079	501	424	540	876	735	1089	730	725	403	495	1048
ENSMUSG00000005533.11	Igf1r	0.751781	5.46558	2.49057	0.136283	0.399502	275	151	363	1835	1421	1125	208	399	87	284	1002
ENSMUSG00000005534.11	Insr	0.710291	5.17499	3.66093	0.0758352	0.317946	316	150	386	1323	982	880	141	388	94	315	684
ENSMUSG00000005540.11	Fcer2a	1.10733	-0.787337	1.80664	0.199747	0.47297	0	4	3	9	8	24	0	4	0	2	9
ENSMUSG00000005547.15	Cyp2a5	-0.661651	-0.747467	1.12631	0.306073	0.571664	2	2	6	4	3	12	1	5	8	12	3
ENSMUSG00000005553.15	Atp4a	-0.693827	-0.658945	1.74356	0.207331	0.481178	7	5	5	1	3	7	4	10	5	5	10
ENSMUSG00000005566.15	Trim28	-0.231871	6.75203	1.39182	0.257259	0.527254	1009	1021	1300	1706	1342	1614	1321	1493	698	1064	1898
ENSMUSG00000005575.17	Ube2m	-0.881228	7.52771	4.04168	0.0635426	0.293697	1683	2418	1806	1156	946	1268	2562	2593	3002	2208	1707
ENSMUSG00000005580.12	Adcy9	0.366753	5.12766	1.1556	0.300096	0.567127	316	152	414	1063	793	754	218	354	128	226	878
ENSMUSG00000005583.17	Mef2c	0.158549	7.13872	0.446689	0.514503	0.734995	1646	639	1547	4033	3041	2147	929	1770	1024	1627	1954
ENSMUSG00000005609.17	Ctr9	-0.0455622	5.3693	0.0787389	0.783013	0.898567	512	317	461	846	643	574	416	575	258	464	605
ENSMUSG00000005610.18	Eif4g2	0.041691	8.91466	0.0336453	0.857026	0.938116	6915	3927	6175	8940	7084	6307	3766	7003	3250	7217	4748
ENSMUSG00000005611.16	Irag1	-0.324358	1.97972	1.03179	0.326535	0.588924	36	28	35	74	79	32	28	62	18	38	107
ENSMUSG00000005615.16	Pcyt1a	0.146777	5.4014	0.734474	0.405501	0.65276	434	329	531	912	679	815	329	526	232	446	723
ENSMUSG00000005621.12	Zfp592	0.123268	4.86331	0.166114	0.689595	0.846769	229	157	266	784	556	704	186	382	124	240	716
ENSMUSG00000005625.16	Psmd4	-0.517827	6.88476	2.35673	0.146461	0.411827	1296	1414	1473	1014	856	1106	1424	1863	1371	1444	1196
ENSMUSG00000005628.13	Tmod4	2.01506	-1.22182	5.32277	0.036414	0.237984	3	4	6	8	12	0	0	0	1	3	1
ENSMUSG00000005640.12	Insrr	1.3372	0.339848	4.28511	0.0569177	0.28088	7	1	8	52	32	43	2	7	2	4	20
ENSMUSG00000005656.10	Snx6	0.184054	4.74536	0.625266	0.441951	0.679441	396	232	382	540	376	338	187	364	195	377	215
ENSMUSG00000005667.9	Mthfd2	-0.145337	3.35901	0.527074	0.479497	0.708314	92	88	106	192	126	196	119	151	64	124	124
ENSMUSG00000005672.13	Kit	0.630783	5.10222	1.36948	0.260941	0.530348	210	102	318	1336	933	985	160	240	61	166	1036
ENSMUSG00000005674.10	Tomm40l	-1.27055	6.52098	11.3887	0.00439114	0.113152	803	877	595	665	618	509	1384	1434	1684	1121	998
ENSMUSG00000005677.15	Nr1i3	-1.26277	3.15149	9.68115	0.00745703	0.138011	77	86	68	52	50	53	135	112	158	130	96
ENSMUSG00000005681.13	Apoa2	-0.394738	-0.209571	0.54699	0.471459	0.702885	8	14	6	7	5	6	12	13	8	4	6
ENSMUSG00000005682.10	Pan2	0.626051	4.53558	3.14189	0.0974941	0.349791	166	110	257	897	572	543	113	242	66	194	452
ENSMUSG00000005683.9	Cs	-0.224201	7.6936	1.37344	0.260284	0.529858	2094	1514	2346	3686	3136	3108	2150	3106	1142	2231	4174
ENSMUSG00000005686.18	Ampd3	1.08197	4.51329	4.82128	0.0449921	0.258159	129	82	154	769	538	1159	120	181	54	112	369
ENSMUSG00000005687.15	Bcas2	0.0589996	5.11656	0.126147	0.727619	0.868556	383	246	428	866	553	507	279	507	213	421	464
ENSMUSG00000005696.12	Sh2d1a	-1.17531	2.67962	2.80531	0.115567	0.373077	51	65	48	118	2	28	119	37	133	95	26
ENSMUSG00000005698.16	Ctcf	0.35428	5.32326	2.34218	0.147624	0.413157	448	236	489	1106	775	805	258	525	142	472	622
ENSMUSG00000005699.17	Pard6a	-0.686934	5.34654	2.98906	0.105241	0.360194	422	523	479	337	226	259	505	617	524	591	365
ENSMUSG00000005705.11	Agrp	0.753844	-1.63979	0.810005	0.382952	0.635125	1	5	0	4	1	5	2	0	1	2	1
ENSMUSG00000005716.17	Pvalb	-0.471329	8.00737	0.918618	0.353685	0.610994	2614	4002	3685	1889	1306	1464	2417	3653	3454	4202	1510
ENSMUSG00000005718.9	Tfap4	0.245527	1.82148	0.622363	0.442991	0.680124	27	26	40	78	67	73	38	49	8	31	49
ENSMUSG00000005732.15	Ranbp1	0.0733465	4.94387	0.0965348	0.760489	0.886321	413	315	383	498	344	519	222	476	187	479	283
ENSMUSG00000005763.16	Cd247	1.00564	0.661602	3.29642	0.0903487	0.339906	7	7	19	41	15	75	8	9	4	22	6
ENSMUSG00000005774.13	Rfx5	0.636155	4.68234	6.24269	0.025164	0.211457	268	183	305	756	477	680	172	294	80	177	426
ENSMUSG00000005779.13	Psmb4	-0.530711	7.09435	1.61213	0.224367	0.497493	1620	1792	1703	1032	780	1066	1482	2235	1729	1964	945
ENSMUSG00000005800.4	Mmp8	1.47732	-1.10322	2.61318	0.127711	0.388705	0	0	1	11	9	18	1	2	0	4	1
ENSMUSG00000005802.13	Slc30a4	0.21391	5.67463	0.675071	0.42471	0.666864	767	429	752	1110	735	591	462	528	400	701	340
ENSMUSG00000005803.15	Sqor	-0.477077	3.30517	1.55598	0.232199	0.505426	101	141	108	83	62	100	93	131	133	132	97
ENSMUSG00000005804.15	Bloc1s6	0.0343434	5.04827	0.0378655	0.848437	0.933591	411	285	402	599	468	536	246	531	232	406	382
ENSMUSG00000005813.13	Metap1	0.115676	4.88842	0.349809	0.563409	0.768811	392	261	409	553	419	421	233	485	150	375	349
ENSMUSG00000005823.10	Gpr108	-0.335309	4.84753	2.4882	0.136455	0.399745	299	297	316	403	302	384	326	371	277	346	387
ENSMUSG00000005824.8	Tnfsf14	0.20309	-1.87602	0.0451699	0.834677	0.926789	0	0	0	5	2	4	0	0	0	2	4
ENSMUSG00000005836.11	Gata6	0.349963	-1.92008	0.193786	0.666333	0.831899	0	1	2	4	2	1	0	0	1	1	3
ENSMUSG00000005846.13	Rsl1d1	0.550762	5.03879	3.87291	0.0686745	0.303796	546	330	521	656	384	597	185	395	148	502	215
ENSMUSG00000005864.8	Cnga2	0.472501	-1.17219	0.602073	0.450369	0.685847	2	4	3	13	3	3	4	4	0	1	4
ENSMUSG00000005871.16	Apc	0.462157	7.23986	3.97009	0.0656619	0.298399	1631	921	1709	4993	3567	2515	1005	1621	680	1729	2056
ENSMUSG00000005873.7	Reep5	-0.242867	8.17673	1.36462	0.261753	0.531011	3702	2629	3392	3957	3613	3568	2823	4634	1993	3650	4479
ENSMUSG00000005881.14	Ergic3	-0.49754	6.58065	2.53192	0.133315	0.396247	1015	1157	1191	926	740	859	1129	1492	1020	1248	1060
ENSMUSG00000005882.19	Uqcc1	-0.125016	5.90873	0.264039	0.615168	0.801718	771	717	767	735	603	746	593	900	423	741	782
ENSMUSG00000005883.16	Spo11	0.820761	-1.25106	1.94386	0.184431	0.456007	3	1	2	14	5	4	2	4	0	2	2
ENSMUSG00000005886.15	Ncoa2	0.817785	5.54128	3.45635	0.083605	0.329233	356	158	452	1761	1397	1308	212	394	94	333	975
ENSMUSG00000005892.5	Trh	-0.187728	3.44277	0.34193	0.567785	0.771435	99	177	76	115	133	156	126	158	68	90	198
ENSMUSG00000005893.15	Nr2c2	0.498254	6.22846	3.1894	0.0952275	0.346828	861	387	876	2245	1722	1554	510	870	210	719	1297
ENSMUSG00000005897.15	Nr2c1	0.583089	2.87887	3.24828	0.0925054	0.343175	84	31	87	238	159	159	43	77	18	70	126
ENSMUSG00000005899.15	Smpd4	0.392181	5.2637	1.09495	0.312658	0.577777	269	145	339	1556	1063	691	224	507	133	310	781
ENSMUSG00000005907.15	Pex1	0.239588	3.76461	0.808233	0.383459	0.635519	150	71	112	420	336	202	96	171	63	139	234
ENSMUSG00000005917.16	Otx1	0.418299	1.43067	1.06305	0.31956	0.583527	21	11	17	86	65	62	15	36	7	18	51
ENSMUSG00000005936.20	Kctd20	-0.0623165	6.02025	0.129757	0.723923	0.866836	713	532	698	1332	1115	874	527	941	365	781	1169
ENSMUSG00000005947.12	Itgae	-0.323269	-0.602642	0.325409	0.577185	0.777925	7	3	5	18	4	2	5	5	7	10	2
ENSMUSG00000005949.10	Ctns	-0.0750581	3.77762	0.147824	0.706252	0.857093	120	91	161	284	250	218	111	193	81	143	268
ENSMUSG00000005950.15	P2rx5	-0.260994	1.32805	0.727993	0.40753	0.654338	24	20	33	34	24	38	24	24	29	23	35
ENSMUSG00000005951.14	Shpk	-0.214877	2.12988	0.625914	0.44172	0.679396	46	51	55	71	41	41	35	65	33	50	71
ENSMUSG00000005952.16	Trpv1	2.26361	-1.06504	6.53497	0.0224778	0.201623	1	0	2	30	5	9	0	1	1	1	2
ENSMUSG00000005958.16	Ephb3	-0.730994	3.09908	7.48907	0.0157613	0.178435	66	43	78	124	119	114	80	146	44	97	272
ENSMUSG00000005968.15	Tuft1	0.0762876	1.95484	0.0883092	0.77059	0.891871	44	30	60	64	46	63	36	35	31	37	54
ENSMUSG00000005973.7	Rcn1	-0.307458	4.85986	1.26306	0.279496	0.548283	398	271	281	428	319	343	210	516	325	412	240
ENSMUSG00000005980.16	Dnase1	0.154456	2.35926	0.152963	0.701457	0.854253	49	28	26	165	128	77	23	59	20	45	135
ENSMUSG00000005981.12	Trap1	-0.242436	5.89841	1.56118	0.23146	0.504668	711	548	758	864	672	750	611	879	462	748	844
ENSMUSG00000005982.15	Naa60	-0.254828	6.23665	2.23144	0.156856	0.42423	725	572	803	1391	1158	1091	795	1144	475	781	1460
ENSMUSG00000005983.16	1700037C18Rik	-0.796853	2.33199	5.35219	0.0359734	0.237311	56	52	51	41	30	39	59	82	54	80	63
ENSMUSG00000005986.17	Ankrd13d	-0.524287	5.14218	6.01839	0.0274803	0.217716	397	317	401	463	386	305	380	586	296	467	590
ENSMUSG00000005994.15	Tyrp1	0.607635	-0.893696	1.02195	0.328775	0.590196	2	9	2	8	13	2	2	4	3	2	5
ENSMUSG00000006005.19	Tpr	1.02507	5.29272	12.1763	0.00348561	0.103793	352	218	460	1903	817	1003	197	305	142	314	457
ENSMUSG00000006010.15	Odr4	0.846979	4.40725	9.92759	0.0068902	0.135018	304	169	330	735	377	345	81	188	71	291	206
ENSMUSG00000006014.17	Prg4	1.45381	1.92714	4.02322	0.0640812	0.294799	4	15	13	190	73	209	13	11	14	11	56
ENSMUSG00000006019.16	Dhx34	-0.279078	3.45451	1.56714	0.230614	0.50398	85	75	93	230	159	206	116	127	86	99	233
ENSMUSG00000006021.6	Kptn	-0.578216	4.0364	7.93433	0.0134426	0.169413	189	120	159	261	203	134	198	273	141	224	240
ENSMUSG00000006024.14	Napa	-0.311106	7.40177	2.58743	0.129455	0.391505	1859	1476	1996	2446	2036	2261	1751	2840	1028	2122	2924
ENSMUSG00000006050.13	Sra1	-0.364058	4.6416	3.14293	0.0974438	0.349717	297	197	278	375	272	332	271	457	179	364	276
ENSMUSG00000006057.16	Atp5g1	-0.717322	7.12508	3.95593	0.066091	0.299655	1645	1582	1577	1026	966	874	1775	2574	1451	2035	1557
ENSMUSG00000006058.11	Snf8	-0.945097	5.78609	6.91681	0.0194542	0.192501	480	616	521	433	340	417	772	923	830	665	567
ENSMUSG00000006095.13	Tbcb	-0.736672	6.5252	3.11919	0.0986005	0.350882	967	1168	1050	658	552	553	1220	1453	1291	1170	772
ENSMUSG00000006127.10	Inpp5k	0.361122	5.3337	3.53455	0.0805277	0.325098	473	356	615	893	597	745	237	522	187	413	652
ENSMUSG00000006134.5	Crkl	0.404569	5.75599	2.39073	0.143789	0.408787	529	387	746	1358	1116	1065	307	747	153	542	1001
ENSMUSG00000006143.13	Upk3bl	-0.148844	-1.4863	0.0342351	0.855793	0.937413	0	5	2	3	3	2	1	4	4	2	0
ENSMUSG00000006154.14	Eps8l1	0.0280955	2.7648	0.00389911	0.95107	0.97913	41	65	82	155	96	126	54	53	25	21	246
ENSMUSG00000006169.21	Clint1	0.283093	5.24995	2.7498	0.118925	0.377713	428	271	453	950	686	738	302	503	192	419	485
ENSMUSG00000006179.10	Prss16	-0.831244	0.394169	3.01772	0.103734	0.358209	14	11	9	12	13	8	10	23	22	18	5
ENSMUSG00000006191.18	Cdkal1	0.177586	2.73119	0.378652	0.547946	0.758839	73	46	84	160	119	97	29	94	29	122	72
ENSMUSG00000006205.14	Htra1	0.147131	7.26757	0.635827	0.438202	0.677081	1648	1545	2074	3220	2245	2377	1444	1852	1210	1318	1968
ENSMUSG00000006215.13	Zbtb17	-0.52294	5.10114	5.12067	0.0396181	0.245892	321	376	329	424	368	379	386	550	373	383	479
ENSMUSG00000006218.5	Fam131c	-1.15465	2.76161	6.19553	0.0256316	0.211935	65	80	46	32	34	42	135	93	99	55	93
ENSMUSG00000006219.13	Fblim1	0.566593	1.02059	1.17519	0.296189	0.563103	11	15	6	42	22	99	19	17	12	11	19
ENSMUSG00000006221.8	Hspb7	0.203533	-1.67264	0.0996642	0.756771	0.884344	1	1	2	4	1	5	1	2	1	0	4
ENSMUSG00000006235.7	Epor	-0.700188	2.88073	4.21825	0.0586523	0.284098	92	81	61	57	64	57	75	137	85	107	80
ENSMUSG00000006241.17	Ccdc159	0.0130938	2.52608	0.00167383	0.967929	0.987523	50	25	31	184	131	96	48	61	44	57	95
ENSMUSG00000006262.16	Mob1b	1.15767	3.70284	7.34432	0.0166124	0.182589	91	42	159	607	330	403	45	77	33	105	193
ENSMUSG00000006270.8	Vax1	0.143349	-1.00649	0.0671334	0.799232	0.906797	4	1	3	5	6	11	2	4	3	7	1
ENSMUSG00000006273.15	Atp6v1b2	-0.139011	8.93165	0.384861	0.544725	0.756469	6641	4390	6398	6805	6156	5962	4185	7887	3191	5910	7732
ENSMUSG00000006276.11	Eps15l1	0.278028	5.14941	0.634685	0.438605	0.677494	284	177	343	1057	807	810	259	377	106	256	910
ENSMUSG00000006281.9	Tep1	0.281189	2.62215	0.665378	0.42798	0.669	41	42	35	192	125	158	47	51	33	47	126
ENSMUSG00000006288.9	Ttc5	-0.116925	5.17241	0.434054	0.520423	0.739015	408	337	457	663	465	443	296	562	286	424	492
ENSMUSG00000006289.15	Osgep	-0.561215	4.6428	5.18828	0.0385108	0.242918	288	225	216	414	271	205	296	413	271	342	255
ENSMUSG00000006299.14	Aamp	-0.449624	7.26402	2.27889	0.152815	0.419403	1695	1770	1919	1653	1313	1414	1729	2378	1676	1954	1649
ENSMUSG00000006301.18	Tmbim1	-0.0724168	5.9508	0.105457	0.750056	0.880549	510	509	543	1142	827	1576	637	770	490	560	982
ENSMUSG00000006304.15	Arpc2	0.0290372	6.6496	0.0114249	0.916356	0.964992	1477	1037	1406	1584	1071	1236	766	1672	721	1470	764
ENSMUSG00000006307.17	Kmt2b	0.548306	5.73189	1.06479	0.319179	0.583095	255	183	428	1799	1187	2030	282	443	118	245	1557
ENSMUSG00000006310.11	Zbtb32	0.999552	0.252056	3.0758	0.100757	0.353485	5	7	4	22	21	59	7	9	5	3	12
ENSMUSG00000006313.6	Upk1a	0.745042	-0.935092	1.03829	0.325067	0.587825	1	2	0	18	8	12	1	4	1	1	8
ENSMUSG00000006315.10	Tmem147	-0.728366	6.15078	2.75854	0.118389	0.376845	800	942	807	429	373	402	845	1191	893	1113	608
ENSMUSG00000006333.15	Rps9	-0.814626	8.37326	2.8096	0.115312	0.373077	3448	4411	3442	2006	1646	1992	4240	5262	5495	4165	2000
ENSMUSG00000006335.17	Tfpt	-0.485387	3.87746	4.27714	0.0571213	0.281354	157	129	183	173	144	166	189	257	122	176	185
ENSMUSG00000006342.16	Susd2	-0.453852	3.22223	2.04856	0.173735	0.443898	75	79	66	130	165	131	110	114	36	86	288
ENSMUSG00000006344.18	Ggt5	0.0840075	1.89369	0.0785158	0.783312	0.898647	31	29	31	71	48	101	46	45	18	29	51
ENSMUSG00000006345.11	Ggt1	-0.387313	1.24162	1.2237	0.28681	0.554913	22	28	16	27	22	37	21	28	31	20	32
ENSMUSG00000006356.11	Crip2	-0.718827	5.95729	9.23367	0.00862927	0.145597	634	532	662	619	609	609	835	1202	571	828	811
ENSMUSG00000006360.12	Crip1	-0.700348	2.33425	2.09251	0.169479	0.438624	58	72	44	34	16	44	48	86	70	77	37
ENSMUSG00000006362.17	Cbfa2t3	-0.174329	3.9792	0.151264	0.703032	0.855236	77	58	125	440	395	272	158	143	68	78	546
ENSMUSG00000006369.15	Fbln1	-0.0680797	3.4104	0.0458883	0.833389	0.926261	57	57	86	246	243	230	132	99	77	79	194
ENSMUSG00000006373.11	Pgrmc1	-0.169653	7.59053	0.323732	0.578157	0.778452	2971	1783	2668	2675	2061	1728	1791	2858	1749	2865	1549
ENSMUSG00000006378.16	Gcat	-0.767274	3.96632	2.24664	0.155547	0.422963	176	222	182	93	55	64	224	237	212	202	128
ENSMUSG00000006386.16	Tek	-0.640979	3.43284	9.06821	0.00911546	0.148569	130	62	93	134	115	152	104	180	89	185	174
ENSMUSG00000006389.14	Mpl	-0.135759	-1.06088	0.052076	0.822704	0.920482	5	0	6	3	5	6	4	8	1	3	3
ENSMUSG00000006390.16	Elovl1	-0.151672	4.63533	0.705072	0.414835	0.660158	231	243	269	432	324	410	265	348	210	250	328
ENSMUSG00000006392.17	Med8	-0.263736	4.19308	2.37825	0.144763	0.410004	174	156	207	302	227	285	167	290	144	247	246
ENSMUSG00000006395.17	Hyi	-0.264945	3.60337	0.565269	0.464281	0.697331	109	171	180	135	110	102	126	164	149	110	126
ENSMUSG00000006398.16	Cdc20	0.306888	0.463313	0.790795	0.388502	0.639647	17	18	12	25	17	17	15	14	6	13	10
ENSMUSG00000006403.14	Adamts4	0.51852	4.58077	1.1897	0.29334	0.56105	122	84	181	866	592	781	109	203	60	203	605
ENSMUSG00000006411.13	Nectin4	0.572916	2.8808	5.15447	0.03906	0.244498	68	50	90	274	117	158	50	85	27	76	84
ENSMUSG00000006412.11	Pfdn2	-0.665304	6.35785	4.46798	0.0524734	0.272712	846	919	870	727	682	709	1049	1215	1059	978	943
ENSMUSG00000006418.18	Rnf114	0.143527	6.553	0.507175	0.487765	0.71445	936	943	1158	1844	1250	1893	824	1219	821	875	937
ENSMUSG00000006423.16	C330007P06Rik	0.553118	4.80352	5.02488	0.0412513	0.249649	403	163	316	948	554	468	162	297	115	378	295
ENSMUSG00000006435.17	Neurl1a	-1.02632	7.42441	12.3484	0.00331748	0.101264	1457	1446	1521	1755	1737	998	2708	2484	2306	1687	3118
ENSMUSG00000006442.11	Srm	-0.663779	4.94627	7.93267	0.0134505	0.169413	336	301	290	332	271	314	391	571	236	439	477
ENSMUSG00000006445.4	Epha2	1.62526	1.79272	12.617	0.00307324	0.0979529	16	20	37	156	66	149	20	17	10	10	26
ENSMUSG00000006456.11	Rbm14	-0.109201	4.80052	0.250699	0.624164	0.807	213	190	264	697	514	459	322	351	158	251	534
ENSMUSG00000006457.5	Actn3	-0.312206	0.516576	0.627688	0.441087	0.679067	8	18	22	13	11	15	15	19	11	12	21
ENSMUSG00000006462.7	A530013C23Rik	1.06566	-1.83892	1.3531	0.263687	0.532848	0	0	1	4	1	8	0	1	0	1	2
ENSMUSG00000006463.14	Zdhhc24	0.164081	3.80288	0.400018	0.537013	0.750726	145	72	165	393	265	234	81	183	57	162	280
ENSMUSG00000006464.10	Bbs1	0.0181606	4.93382	0.00332577	0.954806	0.980832	238	152	273	894	730	477	248	380	124	253	787
ENSMUSG00000006469.14	Slc34a3	-1.52379	-0.884073	7.83595	0.0139189	0.170576	4	4	1	1	2	4	4	9	7	7	6
ENSMUSG00000006471.19	Ndor1	0.303515	4.58318	1.07159	0.317691	0.581964	205	156	282	624	402	614	146	332	72	207	516
ENSMUSG00000006476.20	Nsmf	-1.01444	9.27429	5.75578	0.0305144	0.223836	6111	6851	5627	4351	4370	2618	8960	9660	10127	7199	6448
ENSMUSG00000006494.12	Pdk1	0.393739	5.34154	3.23868	0.0929427	0.343538	516	294	518	1111	887	533	227	581	184	501	481
ENSMUSG00000006498.17	Ptbp1	0.147967	5.372	0.551904	0.469511	0.70166	328	321	505	941	611	990	363	517	250	382	662
ENSMUSG00000006517.6	Mvd	-1.24972	3.959	31.4638	5.83984e-05	0.011282	117	110	121	120	145	117	190	299	175	262	301
ENSMUSG00000006519.12	Cyba	0.148571	3.15682	0.159636	0.695367	0.85053	63	98	104	130	93	259	84	99	100	82	46
ENSMUSG00000006522.18	Itih3	0.577933	6.44502	5.21329	0.0381105	0.241771	892	1364	1359	1366	1242	1660	649	804	561	555	1155
ENSMUSG00000006526.14	Stimate	-0.471113	4.69644	4.86881	0.0440844	0.256467	236	249	323	328	239	330	294	389	217	308	456
ENSMUSG00000006527.17	Sfmbt1	0.47628	4.6867	5.22944	0.0378545	0.241358	265	173	328	696	516	570	136	320	121	264	371
ENSMUSG00000006538.13	Ihh	-0.710931	-1.41668	1.06916	0.318223	0.582214	0	1	0	6	4	4	3	4	1	1	7
ENSMUSG00000006542.14	Prkag3	0.371384	-1.34714	0.384953	0.544678	0.756469	1	6	1	5	5	3	3	3	1	1	3
ENSMUSG00000006546.4	Cryba2	-0.331711	-0.842859	0.235229	0.634983	0.813186	6	10	3	4	0	3	3	5	4	6	7
ENSMUSG00000006567.12	Atp7b	-0.0031306	1.54727	5.27113e-05	0.994307	0.997796	16	17	25	69	56	61	17	25	10	17	99
ENSMUSG00000006574.16	Slc4a1	-0.935216	-0.590729	3.37168	0.0870971	0.334882	1	1	4	10	9	7	11	4	3	7	13
ENSMUSG00000006575.15	Rundc3a	-0.771382	8.6336	5.08871	0.0401545	0.247009	3919	4309	4128	3730	3195	2809	5226	6143	5635	4729	4172
ENSMUSG00000006576.17	Slc4a3	-0.555665	7.11538	8.50278	0.011032	0.159176	1290	1140	1433	2118	1642	1540	1657	2092	1231	1427	2794
ENSMUSG00000006585.4	Cdt1	-0.274933	1.31892	0.395988	0.539043	0.751991	12	17	21	25	18	87	27	22	21	22	48
ENSMUSG00000006586.16	Runx1t1	0.857968	3.19393	3.05945	0.101584	0.354898	51	25	76	446	298	202	43	73	22	55	181
ENSMUSG00000006587.7	Snai3	-0.822228	-1.2259	3.04051	0.102553	0.356685	3	1	1	5	4	3	2	8	3	4	3
ENSMUSG00000006589.9	Aprt	-0.49756	4.34314	3.03453	0.102861	0.357012	239	222	228	208	159	209	224	380	190	270	222
ENSMUSG00000006599.14	Gtf2h1	0.508349	4.78242	3.49136	0.0822104	0.327575	447	301	422	568	353	406	143	341	136	419	193
ENSMUSG00000006611.16	Hfe	0.316648	3.14071	1.44007	0.249537	0.519866	107	109	124	149	93	164	51	127	70	90	74
ENSMUSG00000006638.16	Abhd1	-0.886176	0.925963	8.86782	0.0097471	0.151837	14	10	21	30	10	19	21	35	16	27	30
ENSMUSG00000006641.13	Slc5a6	-0.307154	4.57802	2.70637	0.121636	0.380682	237	245	246	385	292	298	244	355	166	266	452
ENSMUSG00000006642.4	Tcf23	0.498033	0.330762	1.20614	0.290157	0.558043	14	18	9	21	5	34	6	11	7	8	18
ENSMUSG00000006649.18	Nphs1	-0.529656	4.6255	1.45923	0.246555	0.517682	228	371	282	230	148	193	234	397	357	354	133
ENSMUSG00000006651.9	Aplp1	-0.708514	10.0249	5.2515	0.037508	0.240951	11321	10621	11262	9694	8403	8492	14539	16422	11224	12569	14748
ENSMUSG00000006673.15	Qrich1	0.298826	5.96981	1.81092	0.199245	0.472233	732	421	848	1428	1020	1337	359	920	248	809	901
ENSMUSG00000006675.11	P4htm	-0.61074	6.15594	6.61135	0.0218317	0.199299	677	694	777	790	650	813	1055	1169	602	806	1081
ENSMUSG00000006676.17	Usp19	0.173314	6.79487	0.40161	0.536215	0.750116	856	641	1070	3406	2450	2122	1021	1284	495	901	2268
ENSMUSG00000006678.7	Pola1	0.43088	1.2482	1.4696	0.244963	0.516434	25	10	26	72	44	45	8	17	15	34	28
ENSMUSG00000006699.18	Cdc42	0.0754243	7.73906	0.0959199	0.761227	0.886743	3144	2045	3030	3631	2588	2682	1589	3251	1359	3197	2035
ENSMUSG00000006705.14	Pknox1	-0.197371	4.27831	1.28783	0.275022	0.543899	170	154	177	437	318	277	213	247	153	216	290
ENSMUSG00000006711.16	D130043K22Rik	0.117241	4.04891	0.148286	0.705818	0.857039	162	82	168	429	408	250	114	213	58	154	398
ENSMUSG00000006715.12	Gmnn	-0.0602557	1.3182	0.0183296	0.894184	0.955274	31	37	34	28	18	20	14	44	16	44	14
ENSMUSG00000006717.8	Acot13	-0.380195	5.39277	0.853768	0.370743	0.625536	575	548	559	404	302	226	371	725	412	734	293
ENSMUSG00000006720.17	Zfp184	0.109458	1.1618	0.0810026	0.780003	0.896992	34	11	27	62	23	25	8	39	13	35	17
ENSMUSG00000006724.13	Cyp27b1	0.484554	-1.23691	0.358413	0.558708	0.76555	0	1	0	12	10	5	2	1	1	1	7
ENSMUSG00000006728.13	Cdk4	-0.486882	5.5483	3.18725	0.0953284	0.346828	524	510	540	579	424	396	441	866	457	701	509
ENSMUSG00000006731.11	B4galnt1	-0.7206	6.51273	11.7105	0.00399195	0.109303	891	754	871	1031	971	982	1222	1483	930	987	1609
ENSMUSG00000006732.15	Mettl1	-0.564018	3.10242	7.37941	0.0164013	0.181029	89	67	81	128	95	97	80	152	92	93	139
ENSMUSG00000006736.10	Tspan31	-0.106486	5.64134	0.410502	0.531798	0.747658	552	380	542	1098	685	766	407	821	367	652	608
ENSMUSG00000006740.15	Kif5b	1.03065	6.61125	10.7027	0.00540525	0.121137	1006	590	1167	4583	2138	2268	431	501	353	1042	1186
ENSMUSG00000006763.15	Saal1	-0.0496498	3.62962	0.0706789	0.794127	0.904275	119	107	130	310	203	146	94	185	83	156	177
ENSMUSG00000006764.9	Tph2	-0.58568	2.83403	1.28315	0.275858	0.544539	70	91	82	40	56	70	96	27	130	48	104
ENSMUSG00000006777.8	Krt23	-0.5701	-2.0332	0.403954	0.535044	0.749547	1	1	0	4	0	0	1	1	0	3	1
ENSMUSG00000006782.17	Cnp	-0.641073	9.34909	6.24469	0.0251444	0.211419	6213	6010	6298	7507	6232	8153	9211	8922	7421	7188	9321
ENSMUSG00000006784.15	Odad4	0.253663	0.520315	0.445476	0.515066	0.735487	18	4	14	24	25	32	8	18	4	18	18
ENSMUSG00000006800.15	Sulf2	0.208974	6.04288	0.612275	0.446634	0.683211	613	351	671	1655	1205	1705	617	737	285	536	1305
ENSMUSG00000006818.6	Sod2	0.175253	7.07537	0.546181	0.471781	0.703164	1271	805	1401	3363	2790	2823	972	1637	659	1289	2741
ENSMUSG00000006850.9	Tmco6	-0.208717	3.243	0.832412	0.376627	0.630047	97	99	115	163	129	85	84	142	58	143	134
ENSMUSG00000006906.11	Stambp	0.00749289	4.5221	0.00176359	0.96708	0.987198	270	199	318	394	306	352	200	328	137	296	305
ENSMUSG00000006920.15	Ezh1	0.073297	6.1299	0.185036	0.673461	0.836905	738	596	900	1512	1142	1035	545	925	410	719	1261
ENSMUSG00000006930.16	Hap1	0.39688	7.48668	0.959374	0.343546	0.602868	1041	1050	1196	5831	4113	5454	1857	1467	783	809	3760
ENSMUSG00000006931.16	P3h4	-0.663139	3.99608	3.35219	0.0879256	0.33631	161	199	182	115	98	140	195	229	203	195	197
ENSMUSG00000006932.18	Ctnnb1	0.144371	8.32325	0.541782	0.473539	0.704165	3943	2315	3942	7278	5700	4884	2316	4835	1667	4171	4172
ENSMUSG00000006941.6	Eif1b	-0.27477	6.40294	0.858166	0.369548	0.624298	987	1087	1044	1002	805	793	1021	1242	796	999	817
ENSMUSG00000006958.15	Chrd	0.245408	4.87234	1.41091	0.254165	0.524129	298	223	443	732	472	476	207	443	128	257	506
ENSMUSG00000006998.17	Psmd2	-0.309051	7.63503	1.51034	0.23883	0.511029	2403	2131	2431	2334	1910	2372	1992	3052	1910	2378	2521
ENSMUSG00000007021.6	Syngr3	-0.558864	6.78422	6.46478	0.0230912	0.203628	1302	931	1142	1434	1321	915	1352	1776	933	1316	1917
ENSMUSG00000007029.17	Vars	-0.0128815	5.15184	0.00246526	0.961084	0.983934	277	223	377	763	561	859	382	396	187	274	781
ENSMUSG00000007030.9	Vwa7	0.57058	2.50549	1.56135	0.231435	0.504668	29	33	76	199	111	140	47	33	17	18	141
ENSMUSG00000007033.5	Hspa1l	-0.24783	2.29463	0.689746	0.419834	0.663156	29	20	69	111	83	70	40	67	23	69	101
ENSMUSG00000007034.16	Slc44a4	-0.666714	-1.79597	0.562459	0.465372	0.698221	3	0	3	1	1	0	0	4	3	1	1
ENSMUSG00000007035.16	Msh5	0.576438	-0.462101	0.763468	0.396611	0.646043	0	4	7	19	13	16	3	4	1	2	16
ENSMUSG00000007036.16	Abhd16a	-0.389235	6.43895	2.2079	0.15891	0.426903	802	978	1163	1002	715	1090	1064	1172	774	1128	1143
ENSMUSG00000007038.6	Neu1	-0.343908	5.9655	1.93006	0.185903	0.457523	733	640	839	723	565	703	612	996	554	838	811
ENSMUSG00000007039.13	Ddah2	-0.759398	3.81188	4.43752	0.0531845	0.273678	129	177	152	99	90	108	172	224	155	230	158
ENSMUSG00000007041.10	Clic1	0.249189	4.19395	0.79137	0.388335	0.639549	154	187	224	301	211	530	154	249	141	197	129
ENSMUSG00000007050.18	Lsm2	-0.61245	2.74509	7.32793	0.0167121	0.183089	67	55	67	93	75	62	89	112	58	85	91
ENSMUSG00000007080.15	Pole	0.761005	0.943007	5.17985	0.0386469	0.243263	23	13	23	66	30	33	9	15	5	13	32
ENSMUSG00000007097.15	Atp1a2	-0.217959	9.68714	0.502129	0.489901	0.716405	5750	4353	7313	18541	16267	15764	9100	9434	4411	6559	21937
ENSMUSG00000007122.12	Casq1	1.04869	0.582169	6.55633	0.0222949	0.201498	11	13	21	36	19	48	5	7	5	7	24
ENSMUSG00000007207.11	Stx1a	-0.747143	6.49812	7.42236	0.0161471	0.179645	1181	535	915	1072	1167	528	924	1956	577	1368	1833
ENSMUSG00000007209.5	Ceacam9	-1.60375	-2.0683	2.48551	0.136651	0.400034	1	1	0	0	0	1	0	3	0	0	5
ENSMUSG00000007216.7	Zfp775	-0.587882	3.63054	4.63404	0.0487884	0.26548	110	135	129	120	103	159	130	189	142	170	157
ENSMUSG00000007279.15	Scube2	1.02468	0.497874	4.34142	0.0555035	0.277683	12	12	9	46	28	36	2	6	2	13	24
ENSMUSG00000007338.11	Mrpl49	-0.374734	5.19924	2.12765	0.16617	0.435067	476	371	450	474	362	311	350	655	310	517	448
ENSMUSG00000007379.16	Dennd2c	0.259831	-0.133958	0.463923	0.506623	0.728761	6	5	8	24	10	18	5	6	3	11	13
ENSMUSG00000007411.17	Mark3	-0.0909374	6.05858	0.23291	0.636643	0.814016	687	649	803	1125	908	1018	746	863	543	756	736
ENSMUSG00000007415.16	Gatad1	-0.571528	6.11407	3.0388	0.102641	0.356685	820	796	804	665	518	519	707	1143	804	1015	738
ENSMUSG00000007440.11	Pcdha11	-0.41005	2.21285	1.0301	0.326918	0.588957	64	9	30	135	74	38	38	38	41	75	91
ENSMUSG00000007458.15	M6pr	0.112516	6.7613	0.305025	0.589236	0.785372	1388	1138	1442	1753	1270	1851	817	1594	725	1345	1242
ENSMUSG00000007476.19	Lrrc8a	0.854915	5.7545	6.01133	0.0275572	0.218018	339	425	680	1464	1117	1957	297	429	167	296	1025
ENSMUSG00000007480.6	Mc5r	0.866101	0.221751	2.06952	0.171689	0.441915	9	5	10	58	22	13	6	1	13	6	7
ENSMUSG00000007564.16	Ppp2r1a	-0.24318	8.72106	1.25642	0.280711	0.549295	4897	3913	5424	5900	4970	5346	4442	6935	2589	4954	6955
ENSMUSG00000007570.17	Fance	-0.749346	4.27658	5.59882	0.0325139	0.229704	178	227	187	182	137	173	239	300	260	229	242
ENSMUSG00000007589.10	Tinf2	0.0478495	4.39874	0.0458539	0.83345	0.926261	240	205	305	321	229	383	161	343	159	249	210
ENSMUSG00000007591.16	Tssk4	0.580442	-1.6549	0.515043	0.484466	0.711727	1	0	1	9	3	3	1	1	0	0	5
ENSMUSG00000007594.11	Hapln4	-0.343449	6.66617	1.52044	0.237343	0.509558	974	649	1085	1546	1466	1774	1065	1315	441	902	3065
ENSMUSG00000007603.10	Dus3l	-0.221825	5.96989	1.92284	0.186678	0.458404	558	494	757	1184	908	908	575	996	405	779	1062
ENSMUSG00000007610.16	Gtpbp3	-0.355818	4.33768	3.94997	0.0662727	0.300017	204	193	202	337	265	225	191	326	173	255	302
ENSMUSG00000007613.16	Tgfbr1	-0.0793517	3.98724	0.14865	0.705476	0.856884	202	129	188	295	194	234	145	221	147	186	155
ENSMUSG00000007617.19	Homer1	0.741809	5.91011	4.84625	0.0445126	0.257162	730	265	548	2976	1553	826	359	606	299	682	447
ENSMUSG00000007646.14	Rad51c	0.609668	1.39955	4.05404	0.0631851	0.292849	32	18	28	85	58	34	17	30	14	12	34
ENSMUSG00000007653.13	Gabrb2	1.33257	4.87332	5.28339	0.0370139	0.239845	202	58	223	1848	976	723	97	132	52	147	549
ENSMUSG00000007655.17	Cav1	-0.450244	3.35621	2.48658	0.136573	0.399855	135	88	122	133	114	73	108	164	65	193	121
ENSMUSG00000007656.14	Arpp19	-0.210736	7.21294	0.457478	0.509544	0.731192	2377	1257	1673	2561	1978	982	1052	2432	1338	2519	1268
ENSMUSG00000007659.19	Bcl2l1	-0.118843	6.90624	0.307817	0.587554	0.784272	1317	1292	1403	1719	1372	1942	1372	1611	958	1119	1661
ENSMUSG00000007670.11	Khsrp	0.186793	5.60267	0.174832	0.682033	0.842663	280	168	381	1682	1285	1053	421	486	120	331	1369
ENSMUSG00000007682.8	Dio2	0.924938	5.25085	6.43872	0.0233239	0.204542	464	184	487	2000	905	460	172	334	121	518	288
ENSMUSG00000007721.7	Ccdc124	-0.980042	5.99702	7.91468	0.0135362	0.169469	585	616	697	474	454	385	933	1238	817	885	626
ENSMUSG00000007739.11	Cct4	-0.178866	6.31102	0.327083	0.576218	0.777436	1083	888	1016	1111	858	704	783	1202	814	1055	517
ENSMUSG00000007777.10	0610009B22Rik	-0.475764	4.07888	0.857371	0.369764	0.624441	230	245	198	157	102	57	186	207	212	304	78
ENSMUSG00000007783.11	Cpt1c	-0.264349	6.30777	2.57833	0.130079	0.392051	871	649	847	1310	1155	1040	788	1166	636	863	1331
ENSMUSG00000007805.5	Twist2	-1.06913	-1.00612	3.45478	0.0836682	0.329233	4	3	5	1	1	3	2	7	2	7	10
ENSMUSG00000007812.17	Zfp655	0.577712	4.57523	6.09846	0.0266261	0.215294	356	190	343	698	348	408	130	275	137	308	166
ENSMUSG00000007815.14	Rhoa	-0.145145	6.93393	0.692981	0.418771	0.66244	1262	998	1394	2183	1590	2142	1307	1777	718	1458	1926
ENSMUSG00000007817.16	Zmiz1	0.615948	6.25399	0.773752	0.39353	0.644035	273	140	358	2985	2233	2961	378	379	140	262	2600
ENSMUSG00000007827.11	Ankrd26	0.849041	2.7326	4.81329	0.045147	0.258629	57	32	68	346	183	82	37	37	25	64	90
ENSMUSG00000007833.16	Aldh16a1	-0.446185	3.05448	3.27144	0.0914599	0.341368	82	78	98	113	88	89	115	107	75	77	134
ENSMUSG00000007836.7	Hnrnpa0	-0.372579	6.72527	4.01309	0.0643792	0.295362	969	819	1187	1745	1267	1637	1333	1379	973	1202	1503
ENSMUSG00000007837.12	Prrg2	-0.511039	2.49032	3.42593	0.08484	0.331255	67	54	58	56	56	58	56	90	58	74	71
ENSMUSG00000007850.17	Hnrnph1	1.06717	6.57287	5.67421	0.0315351	0.226941	722	269	877	5249	2967	2129	355	726	249	834	1359
ENSMUSG00000007867.10	Ift43	-0.537476	2.35267	6.23166	0.0252725	0.211538	50	41	42	82	56	64	56	70	49	71	74
ENSMUSG00000007872.4	Id3	-0.281782	5.23241	1.62733	0.222307	0.495431	368	362	438	607	380	566	452	597	324	464	356
ENSMUSG00000007877.3	Tcap	-0.404735	1.1934	1.10356	0.31083	0.575953	26	27	24	21	19	22	11	50	14	39	27
ENSMUSG00000007880.17	Arid1a	0.350958	6.27708	0.331281	0.573808	0.775693	270	188	359	2971	2128	2545	500	545	238	312	2556
ENSMUSG00000007888.16	Crlf1	-0.53812	1.5845	2.61035	0.127901	0.388953	28	23	42	50	24	21	31	65	30	30	29
ENSMUSG00000007891.17	Ctsd	-0.732009	8.91097	4.6085	0.0493348	0.266422	4637	5511	4682	3747	3313	5201	6352	6849	6561	5409	6115
ENSMUSG00000007892.9	Rplp1	-1.02291	9.7006	3.09974	0.0995604	0.352131	7548	11912	7745	3582	3031	3512	10239	12511	16386	11311	4413
ENSMUSG00000007908.15	Hmgcll1	0.43163	3.19602	2.13717	0.165288	0.43383	128	48	126	331	172	89	50	104	39	108	133
ENSMUSG00000007944.9	Ttc9b	-0.985617	6.43186	7.55122	0.0154114	0.176421	944	813	826	598	661	462	1081	1661	1223	1199	920
ENSMUSG00000007946.12	Phox2a	-0.541382	-1.48794	0.489431	0.495349	0.720761	3	0	0	2	1	8	3	2	3	1	4
ENSMUSG00000007950.10	Abhd8	-0.875784	8.68963	4.51781	0.0513343	0.269765	3989	4888	4272	2831	2800	2353	6103	6246	6194	4850	3908
ENSMUSG00000007987.13	Ift22	-0.47731	5.38205	3.17291	0.0960068	0.347636	532	436	443	479	418	342	382	791	377	619	509
ENSMUSG00000007989.8	Fzd3	0.4077	5.62765	2.30448	0.150689	0.416734	603	214	505	1547	1367	727	332	541	340	492	568
ENSMUSG00000008028.16	1700008O03Rik	-0.15185	0.528023	0.17777	0.679536	0.84117	11	16	14	20	11	26	12	19	13	18	10
ENSMUSG00000008035.13	Mid1ip1	-0.781164	6.89887	11.2981	0.0045117	0.114267	1058	1087	1183	1204	1109	1248	1770	2043	1093	1510	1882
ENSMUSG00000008036.12	Ap2s1	-0.607431	6.869	3.09891	0.0996012	0.352131	1400	1272	1489	974	848	817	1311	2210	1136	1831	1190
ENSMUSG00000008090.15	Fgfrl1	-0.256366	4.51247	1.24164	0.283444	0.551664	145	140	192	502	356	498	266	308	201	241	310
ENSMUSG00000008129.15	Brme1	-0.389086	1.3512	1.20082	0.291181	0.559311	33	24	35	33	15	20	29	36	24	25	33
ENSMUSG00000008136.15	Fhl2	-0.113062	4.48497	0.195681	0.664815	0.831292	325	175	296	371	277	256	175	393	153	365	189
ENSMUSG00000008140.19	Emc10	-0.928094	7.68032	10.437	0.00586836	0.126116	1958	1972	1836	1861	1613	1597	3008	3317	2516	2644	2905
ENSMUSG00000008153.13	Clstn3	-0.515357	8.22702	4.05606	0.0631268	0.292849	2218	2005	2638	5410	4579	4402	3885	3544	2110	2442	8206
ENSMUSG00000008167.15	Fbxw9	-0.148332	3.7851	0.583596	0.457266	0.692276	125	151	167	247	169	178	113	195	110	167	206
ENSMUSG00000008193.14	Spib	2.62287	-1.58519	5.54156	0.0332812	0.232131	0	0	0	15	5	6	0	1	0	0	1
ENSMUSG00000008200.16	Fnbp4	1.35038	5.46016	7.1998	0.0175156	0.185493	325	111	447	2015	1095	1842	128	375	61	294	602
ENSMUSG00000008206.17	Cers4	0.699743	5.13932	3.18486	0.0954411	0.346858	274	135	303	1488	988	844	174	330	103	272	689
ENSMUSG00000008226.15	Scrn3	0.369506	4.46303	2.69414	0.122413	0.381719	329	176	265	584	395	292	135	261	106	330	224
ENSMUSG00000008301.12	Phax	0.0661885	4.94435	0.0445868	0.835731	0.927391	470	370	445	443	269	355	227	498	224	454	214
ENSMUSG00000008305.19	Tle1	-0.160879	4.73805	0.886915	0.361877	0.61806	310	210	310	471	419	329	287	379	174	311	402
ENSMUSG00000008307.12	1700109H08Rik	1.71774	1.1817	3.43252	0.0845707	0.330543	4	0	15	109	62	112	0	16	1	6	35
ENSMUSG00000008318.11	Relt	-0.232006	4.93	0.48837	0.49581	0.721153	373	433	377	254	231	356	345	432	282	296	396
ENSMUSG00000008333.13	Snrpb2	-0.140182	4.36174	0.146193	0.707795	0.857806	289	271	243	243	189	205	155	269	239	313	119
ENSMUSG00000008348.10	Ubc	-0.160001	7.14762	0.604458	0.449491	0.685242	1404	807	1377	2642	2313	2954	1329	1687	1114	1506	2637
ENSMUSG00000008373.17	Prpf31	-0.178768	5.02832	0.82831	0.377773	0.631158	394	298	380	480	372	503	283	521	285	392	397
ENSMUSG00000008384.9	Sertad1	-0.178615	3.48284	0.592876	0.45378	0.688593	120	88	135	202	125	180	92	198	92	162	93
ENSMUSG00000008393.10	Carhsp1	0.164273	6.47545	0.459686	0.50854	0.730286	1046	1116	1152	1233	893	1796	721	1186	690	921	970
ENSMUSG00000008398.17	Elk3	0.206008	3.33204	0.671628	0.425867	0.667613	82	90	116	181	129	285	106	134	53	92	117
ENSMUSG00000008429.9	Herpud2	0.289332	4.85567	2.25299	0.155004	0.422468	321	188	364	789	506	543	240	369	124	324	398
ENSMUSG00000008435.16	Rdh13	-0.098993	4.51535	0.226646	0.641178	0.816575	289	216	289	364	299	279	189	369	115	288	393
ENSMUSG00000008438.4	Adam21	0.875545	-0.352373	5.13374	0.0394011	0.245452	6	6	8	21	11	15	3	9	4	3	4
ENSMUSG00000008450.9	Nutf2	-0.179559	4.08355	0.701033	0.416143	0.661062	198	154	203	306	201	208	136	338	93	240	215
ENSMUSG00000008461.7	Fut1	1.12548	-2.13104	1.37141	0.260621	0.52993	0	1	0	3	1	3	1	0	0	1	0
ENSMUSG00000008475.14	Arpc5	0.0295318	6.03055	0.0166999	0.898968	0.95742	858	570	846	1253	868	913	541	1043	507	889	480
ENSMUSG00000008482.10	Rnf151	-0.861774	-2.35264	0.792515	0.388001	0.639223	0	1	0	0	1	0	0	1	0	1	1
ENSMUSG00000008489.19	Elavl2	0.471782	5.19961	3.89027	0.0681245	0.302813	510	241	417	1118	787	554	334	263	267	355	347
ENSMUSG00000008496.20	Pou2f2	0.802552	3.34774	2.42658	0.141036	0.405342	32	43	57	631	232	259	52	74	54	48	175
ENSMUSG00000008540.12	Mgst1	0.153632	4.0338	0.248446	0.625712	0.808046	166	207	205	237	162	356	152	199	151	186	95
ENSMUSG00000008575.18	Nfib	0.0374607	5.99753	0.0367266	0.850704	0.93503	559	410	717	1586	1224	1104	604	686	541	686	818
ENSMUSG00000008601.13	Rab25	-0.353386	-1.60488	0.214473	0.650219	0.82161	1	2	3	1	0	5	2	1	0	4	4
ENSMUSG00000008604.12	Ubqln4	-0.837692	6.97203	19.2453	0.000584358	0.0383397	1089	895	1027	1699	1528	1224	1634	2144	1382	1385	2322
ENSMUSG00000008658.17	Rbfox1	0.402998	6.39692	2.11952	0.166929	0.435494	904	385	981	2757	1872	1603	662	927	282	844	1433
ENSMUSG00000008668.16	Rps18	-0.674309	8.17126	1.61497	0.22398	0.497145	3095	4426	3048	1695	1331	1715	2996	4096	5035	3859	1448
ENSMUSG00000008682.14	Rpl10	-0.592058	8.277	1.83508	0.196443	0.469107	3643	4077	3684	2393	1846	2025	3976	5311	3909	4107	1902
ENSMUSG00000008683.17	Rps15a	-0.389002	7.56844	1.39105	0.257385	0.527353	2111	2494	1943	2261	1608	1933	1797	2418	2576	2387	1797
ENSMUSG00000008690.16	Ncaph2	-0.74482	7.0821	5.84344	0.0294602	0.220931	1329	1445	1397	1278	1146	1076	1775	2002	1819	1572	1700
ENSMUSG00000008730.18	Hipk1	0.546479	6.6635	2.93886	0.107947	0.363856	814	535	1006	3042	2620	2699	678	1010	374	692	1994
ENSMUSG00000008734.10	Gprc5b	-0.45561	8.02276	4.14379	0.0606583	0.28881	2301	2565	2722	3627	3601	2725	3343	3411	1892	2833	5364
ENSMUSG00000008763.17	Man1a2	0.502506	6.10667	4.74676	0.04646	0.260366	730	379	790	2245	1662	1284	468	800	330	782	747
ENSMUSG00000008822.16	Acyp1	-0.11895	3.35815	0.117613	0.736602	0.873645	140	119	141	152	109	74	64	142	100	176	76
ENSMUSG00000008845.10	Cd163	-0.0335599	-0.0859711	0.0092694	0.92463	0.968159	10	10	10	13	7	11	7	13	4	8	13
ENSMUSG00000008855.18	Hdac5	-0.793063	7.63143	9.32046	0.00838623	0.144077	1474	1884	1605	2693	2339	1764	2893	2673	2567	1886	3255
ENSMUSG00000008859.9	Rala	0.0362647	5.42502	0.0217015	0.884931	0.951287	692	349	536	782	580	510	276	703	266	687	424
ENSMUSG00000008892.13	Vdac3	-0.400368	7.03234	1.15717	0.299782	0.566835	1837	1574	1703	1156	898	998	1326	2042	1381	1997	1123
ENSMUSG00000008932.11	Slc1a7	1.7167	-1.77761	4.0989	0.0619069	0.291235	4	4	1	2	1	3	0	2	0	0	1
ENSMUSG00000008958.15	Vps72	-0.495239	4.93296	4.76617	0.0460722	0.260081	295	319	323	385	313	344	411	493	263	374	389
ENSMUSG00000008976.17	Gabpa	0.789501	3.84537	6.11769	0.0264255	0.214268	148	63	131	669	385	254	87	124	60	138	158
ENSMUSG00000008999.8	Bmp7	0.0760684	3.01682	0.0683406	0.797478	0.906025	49	59	67	217	153	176	81	82	58	51	151
ENSMUSG00000009013.6	Dynll1	-0.836816	7.38509	6.30882	0.024525	0.20945	2073	1423	1579	1710	1623	796	2416	3433	1571	2654	1628
ENSMUSG00000009030.15	Pdcl	0.15935	4.19722	0.538897	0.474697	0.704901	228	161	223	452	320	199	168	182	117	262	189
ENSMUSG00000009035.16	Tmem184b	0.713527	6.30024	3.26309	0.0918354	0.342238	442	347	672	2839	1983	2730	504	792	262	478	1386
ENSMUSG00000009070.15	Rsph14	-1.4483	-1.26821	3.50747	0.0815777	0.326881	4	2	0	6	0	0	4	7	4	4	3
ENSMUSG00000009073.17	Nf2	-0.156931	6.39341	0.718608	0.410497	0.656616	793	645	803	1666	1375	1434	739	1227	491	888	1753
ENSMUSG00000009075.3	Cabp7	-0.233954	6.69534	0.576083	0.46012	0.694022	1243	1366	1386	1049	902	1053	1199	1368	997	1026	1335
ENSMUSG00000009076.11	Zmat5	-0.529093	3.92274	1.98178	0.180465	0.451891	158	210	181	116	96	127	166	282	152	217	140
ENSMUSG00000009079.17	Ewsr1	0.454394	6.92789	3.19519	0.0949554	0.346327	1196	703	1444	3783	2442	2777	664	1666	458	1254	1903
ENSMUSG00000009090.18	Ap1b1	-0.33062	7.33841	2.42968	0.140801	0.405135	1574	1585	1790	2337	1958	2210	1915	2159	1233	1490	3243
ENSMUSG00000009092.6	Derl3	-0.227127	1.00765	0.264155	0.615091	0.801718	8	8	12	60	48	23	8	35	21	27	18
ENSMUSG00000009097.11	Tbx1	0.0472682	0.619886	0.0218561	0.884525	0.951105	14	12	15	36	16	25	11	23	4	19	21
ENSMUSG00000009108.16	Gnat2	-0.22296	-1.49331	0.0933047	0.764397	0.888458	4	0	3	3	1	4	0	6	2	3	1
ENSMUSG00000009112.5	Bcl2l13	0.0368381	5.62162	0.0437106	0.837327	0.92798	502	395	585	1038	823	806	357	660	277	545	937
ENSMUSG00000009114.18	2610028H24Rik	-1.25611	-2.19812	1.52956	0.236008	0.508376	0	0	0	2	0	1	2	0	1	2	0
ENSMUSG00000009145.7	Dqx1	0.975837	-0.671	1.8338	0.19659	0.469194	5	0	2	27	16	6	3	4	0	3	7
ENSMUSG00000009185.3	Ccl8	3.04983	-1.73543	8.42888	0.0113153	0.160548	0	1	5	2	4	7	0	0	1	0	0
ENSMUSG00000009207.16	Lnpk	0.474929	3.81283	2.85782	0.112495	0.369526	166	61	157	469	323	252	107	109	59	170	195
ENSMUSG00000009210.11	Prr29	-0.998416	-1.22601	2.14623	0.164453	0.432849	5	0	0	6	1	4	3	6	2	7	3
ENSMUSG00000009214.10	Mymk	-0.257305	-1.67457	0.0671579	0.799196	0.906797	5	1	1	0	0	4	6	1	0	1	1
ENSMUSG00000009216.8	Fam163b	-0.27043	5.77138	0.729677	0.407002	0.654081	468	268	455	1151	1223	800	476	809	241	415	1665
ENSMUSG00000009246.15	Trpm5	-0.0346515	-0.942039	0.00299793	0.957089	0.98185	1	2	3	7	3	15	4	2	1	2	12
ENSMUSG00000009248.7	Ascl2	0.114988	-1.41176	0.0344997	0.855244	0.937298	1	2	1	3	3	9	2	1	3	1	4
ENSMUSG00000009281.7	Rarres2	0.02268	3.73025	0.00376277	0.951932	0.97976	112	115	95	236	100	465	106	169	133	171	94
ENSMUSG00000009291.14	Pttg1ip	0.0682647	6.04207	0.141908	0.711895	0.860048	586	543	750	1270	1008	1481	564	851	422	669	1066
ENSMUSG00000009292.19	Trpm2	-0.267152	5.11665	1.855	0.194171	0.466761	357	213	312	708	591	511	341	414	259	355	756
ENSMUSG00000009293.18	Ube2g2	-0.297436	5.69995	1.38124	0.258994	0.528599	593	609	622	701	502	535	515	812	518	612	604
ENSMUSG00000009350.14	Mpo	0.590313	-1.52668	0.424725	0.524874	0.742471	0	2	0	3	5	9	3	1	0	0	4
ENSMUSG00000009356.13	Lpo	-0.287475	1.29836	0.494333	0.493234	0.718913	9	16	19	44	24	71	26	16	25	24	44
ENSMUSG00000009376.16	Met	0.47571	1.70266	2.50948	0.134915	0.397944	29	16	33	87	67	82	16	33	21	36	33
ENSMUSG00000009378.5	Slc16a12	0.024092	1.18605	0.00618614	0.938394	0.972838	22	24	34	39	23	27	17	29	19	28	19
ENSMUSG00000009394.14	Syn2	-0.2563	8.13658	1.09973	0.311642	0.576751	2636	1661	2726	5676	5361	4055	3064	3635	1664	2384	6899
ENSMUSG00000009406.14	Elk1	-0.1295	6.15506	0.47436	0.501956	0.725653	615	659	789	1422	1064	1089	788	870	633	620	1063
ENSMUSG00000009418.17	Nav1	0.414759	6.18114	0.83215	0.3767	0.63008	512	242	635	2312	1863	2060	335	726	213	439	2095
ENSMUSG00000009470.18	Tnpo1	0.819524	5.58684	8.02059	0.0130403	0.168213	456	250	475	1673	1346	1248	346	333	227	336	617
ENSMUSG00000009471.5	Myod1	0.165776	-1.6715	0.0684599	0.867154	0.942579	5	1	2	3	1	1	1	1	1	2	3
ENSMUSG00000009535.14	Rnmt	0.364474	5.60561	3.33588	0.0886263	0.336917	684	365	746	1152	715	806	280	642	279	620	520
ENSMUSG00000009545.15	Kcnq1	-1.50507	-0.370334	7.07292	0.0183557	0.189105	5	3	1	6	1	12	12	20	2	12	9
ENSMUSG00000009549.15	Srp14	-0.32587	6.44286	0.607567	0.448352	0.684634	1258	1184	1132	694	557	636	783	1508	907	1332	585
ENSMUSG00000009551.3	6330409D20Rik	-0.0863942	0.571072	0.0621319	0.806685	0.910924	9	12	12	44	15	21	8	16	14	12	25
ENSMUSG00000009555.17	Cdk9	-0.447073	6.25455	4.53575	0.0509313	0.269037	740	742	868	1144	838	805	897	1163	766	860	1044
ENSMUSG00000009563.17	Tor2a	-0.406299	4.65449	2.7637	0.118073	0.376297	298	227	340	285	236	279	253	439	225	335	313
ENSMUSG00000009566.13	Fpgs	-0.148236	2.88788	0.383842	0.545252	0.756834	64	60	87	121	69	168	62	111	50	79	128
ENSMUSG00000009569.15	Mrtfb	0.277502	6.81295	0.652189	0.432495	0.672695	899	480	995	3429	2941	2438	624	1340	503	864	2671
ENSMUSG00000009575.15	Cbx5	0.260546	7.14334	1.03915	0.324872	0.587751	1336	817	1391	3970	3505	2540	900	1813	664	1354	2698
ENSMUSG00000009585.19	Apobec3	2.82585	3.58693	20.1608	0.000477891	0.0338025	48	18	108	698	456	599	23	43	12	31	47
ENSMUSG00000009596.10	Taf7l	1.50714	-2.25628	2.00473	0.178115	0.44889	0	0	2	1	2	1	0	0	1	0	0
ENSMUSG00000009614.17	Sardh	-0.835486	4.07631	6.97652	0.0190253	0.191151	137	172	172	134	128	179	278	204	211	182	247
ENSMUSG00000009621.19	Vav2	0.0540271	3.70683	0.0324975	0.859457	0.939359	105	91	108	315	238	292	124	138	57	88	329
ENSMUSG00000009628.15	Tex15	0.810874	0.100152	2.50105	0.135523	0.398713	10	19	11	36	10	6	8	8	7	7	3
ENSMUSG00000009630.11	Ppp2cb	-0.447877	6.56272	1.84089	0.195777	0.46837	1156	1110	1162	985	808	709	945	1577	1019	1410	840
ENSMUSG00000009633.4	G0s2	-0.775713	2.87209	2.49177	0.136195	0.399493	76	102	83	36	40	34	84	112	112	96	62
ENSMUSG00000009640.12	Dmap1	-0.377023	4.47728	3.1337	0.0978917	0.349952	267	208	242	264	229	299	250	355	176	275	324
ENSMUSG00000009647.14	Mcu	0.009897	4.28042	0.00181834	0.966574	0.986993	191	118	230	434	355	327	162	296	73	204	393
ENSMUSG00000009654.5	Oit3	0.115893	-1.98514	0.0260874	0.916766	0.965049	0	2	1	2	1	2	1	1	0	1	2
ENSMUSG00000009670.12	Tex11	-1.62982	-1.85441	3.5849	0.0786177	0.321782	1	0	1	3	0	0	0	3	2	5	1
ENSMUSG00000009681.11	Bcr	-0.275536	6.61749	1.01423	0.330546	0.591933	695	567	738	2285	1989	1659	1048	1252	632	755	2492
ENSMUSG00000009687.15	Fxyd5	0.604959	3.1555	3.91856	0.0672394	0.301095	58	65	97	263	164	277	45	125	29	82	118
ENSMUSG00000009731.5	Kcnd1	-0.244602	3.11834	0.657816	0.430559	0.671304	67	41	73	230	151	142	78	114	50	62	239
ENSMUSG00000009733.10	Tfcp2	0.266418	3.83755	1.0662	0.31887	0.58284	139	98	164	401	285	246	104	179	46	130	294
ENSMUSG00000009734.19	Pou6f2	0.613726	0.594001	1.97955	0.180694	0.452057	6	7	13	59	25	38	8	16	3	13	20
ENSMUSG00000009739.18	Pou6f1	-0.36163	6.80544	3.56921	0.079207	0.322362	1037	861	1145	1861	1613	1620	1067	1609	935	1013	2479
ENSMUSG00000009741.16	Ubp1	0.279951	6.06578	1.03015	0.326906	0.588957	646	335	770	1822	1396	1472	459	909	220	666	1297
ENSMUSG00000009772.16	Nuak2	1.27421	1.86809	14.4782	0.00184996	0.0747409	29	28	43	108	62	149	16	28	15	17	32
ENSMUSG00000009828.16	Cilk1	0.146056	4.4438	0.53011	0.478256	0.707305	234	138	223	554	422	387	170	298	103	229	372
ENSMUSG00000009863.15	Sdhb	-0.578712	7.26991	1.7043	0.212239	0.486052	1939	2085	1812	1012	819	1036	1699	2451	2042	2183	1163
ENSMUSG00000009876.14	Cox4i2	-1.24632	1.56695	7.16786	0.0177228	0.186193	22	32	22	18	15	18	51	34	55	31	30
ENSMUSG00000009894.16	Snap47	-0.439595	8.28672	2.72393	0.12053	0.379339	3881	3073	3979	3292	3047	2863	3650	5042	2559	3788	4827
ENSMUSG00000009905.6	Kdsr	0.328202	4.47773	2.52933	0.133499	0.396388	230	179	279	612	420	366	131	292	91	263	351
ENSMUSG00000009907.18	Vps4b	0.426526	4.99068	3.24815	0.0925109	0.343175	459	237	471	814	417	588	166	417	189	440	256
ENSMUSG00000009927.10	Rps25	-0.584306	8.16076	1.18702	0.293863	0.561415	3353	4471	3435	1596	1272	1443	3065	4490	4228	4062	1466
ENSMUSG00000009941.11	Nxf2	0.413806	-2.15932	0.173275	0.683367	0.843324	0	1	1	0	3	1	0	0	0	1	2
ENSMUSG00000009995.18	Taz	0.264104	4.88298	0.965218	0.342127	0.601817	326	184	348	882	566	470	121	462	119	343	535
ENSMUSG00000010021.14	Kif19a	-0.306209	2.21038	1.26019	0.28002	0.548584	36	49	40	94	46	67	49	56	49	36	75
ENSMUSG00000010025.20	Aldh3a2	0.163732	5.54905	0.716234	0.411252	0.657191	603	360	653	905	731	763	354	674	202	582	705
ENSMUSG00000010044.13	Zmynd10	-0.311759	1.08701	1.22343	0.28686	0.554965	24	11	15	39	39	22	22	29	15	23	32
ENSMUSG00000010045.3	Tmem115	-0.524441	5.42491	3.9768	0.0654597	0.297997	382	467	482	502	371	526	589	642	457	478	502
ENSMUSG00000010047.13	Hyal2	-0.759995	4.03447	4.51672	0.051359	0.269784	164	209	144	148	97	132	241	242	194	224	171
ENSMUSG00000010048.11	Ifrd2	-0.148338	2.62464	0.444138	0.515688	0.735885	55	59	79	121	86	65	50	108	42	75	79
ENSMUSG00000010051.16	Hyal1	0.557173	2.4113	1.84261	0.19558	0.468207	40	27	42	157	140	142	25	40	22	27	129
ENSMUSG00000010054.5	Tusc2	-0.677937	6.68993	3.15232	0.0969912	0.349104	1184	1282	1149	759	686	656	1109	1715	1333	1465	1080
ENSMUSG00000010057.9	Nprl2	-0.406695	4.57106	2.27446	0.153187	0.4197	303	236	303	312	231	173	255	434	159	345	321
ENSMUSG00000010064.16	Slc38a3	-0.877931	6.13298	18.2186	0.000737399	0.0437498	588	560	562	795	677	832	952	1050	587	867	1726
ENSMUSG00000010066.16	Cacna2d2	0.233599	5.43651	0.297591	0.593763	0.787427	240	209	362	1337	939	1201	299	405	129	262	1314
ENSMUSG00000010067.14	Rassf1	0.613989	3.62014	4.19206	0.0593488	0.285811	116	79	184	361	222	296	47	178	37	165	124
ENSMUSG00000010080.16	Epn3	-0.609841	3.68998	4.63533	0.0487608	0.26548	101	143	119	136	112	182	194	142	130	132	228
ENSMUSG00000010086.18	Rnf112	0.0821498	7.9319	0.131366	0.722294	0.865825	2398	1510	3268	6514	4566	3343	1750	3661	1128	2843	4365
ENSMUSG00000010095.14	Slc3a2	-0.0125892	6.83157	0.00350881	0.953581	0.980308	1111	968	1363	1942	1289	2653	1287	1540	719	1124	1581
ENSMUSG00000010097.16	Nxf1	0.537059	5.7078	2.05208	0.17339	0.44351	545	176	637	1780	1225	1171	212	733	130	475	1017
ENSMUSG00000010110.18	Stx5a	0.0338885	5.98473	0.0418766	0.840725	0.929954	669	604	792	1347	951	863	455	915	430	761	923
ENSMUSG00000010122.15	Slc47a1	-0.134872	1.07937	0.107274	0.747992	0.879528	12	10	13	48	49	35	23	14	11	14	54
ENSMUSG00000010136.15	Pifo	-0.531412	0.217709	1.02903	0.327161	0.588957	10	15	13	6	7	11	6	20	19	9	9
ENSMUSG00000010142.13	Tnfrsf13b	-0.757457	0.604629	3.86237	0.0690109	0.304227	9	13	20	13	10	16	14	21	22	16	19
ENSMUSG00000010154.8	Spire2	-0.743346	4.78874	4.15026	0.0604808	0.288592	249	338	288	186	212	243	402	353	387	285	343
ENSMUSG00000010175.14	Prox1	0.858882	4.45027	7.18242	0.017628	0.185869	186	111	256	861	524	573	105	186	65	177	351
ENSMUSG00000010205.12	Raver1	0.0112424	4.62485	0.000947726	0.975864	0.991482	148	103	218	630	506	638	268	273	96	163	623
ENSMUSG00000010277.8	2610507B11Rik	-0.385108	8.40827	3.60299	0.0779448	0.320688	3196	3004	3204	5525	4364	4923	3777	4350	3504	3468	5575
ENSMUSG00000010290.8	AI597479	0.105051	4.58764	0.241685	0.630415	0.810536	283	152	289	604	464	313	169	341	115	258	448
ENSMUSG00000010307.8	Tmem86a	-0.74642	4.58611	3.65695	0.0759778	0.318079	245	283	268	136	134	232	308	364	338	271	273
ENSMUSG00000010311.16	Optc	0.609901	-0.383936	1.81506	0.198761	0.471556	9	8	11	7	6	15	4	8	5	5	3
ENSMUSG00000010342.17	Tex14	0.498	-1.08151	0.646588	0.434435	0.674218	4	2	2	9	2	12	0	5	3	2	4
ENSMUSG00000010358.14	Ifi35	2.89871	4.02621	35.9781	2.92348e-05	0.00771308	102	54	205	846	527	816	28	61	26	39	42
ENSMUSG00000010362.10	Rdm1	-1.14666	3.00934	7.71045	0.0145552	0.172909	69	87	70	61	44	36	122	126	128	109	80
ENSMUSG00000010376.16	Nedd8	-0.555038	6.19459	1.98292	0.180347	0.451891	887	903	873	601	525	507	553	1366	865	1313	567
ENSMUSG00000010392.9	Gosr1	0.25818	5.33694	1.51196	0.238591	0.510875	448	268	508	1024	688	796	347	478	163	380	725
ENSMUSG00000010406.13	Mrpl52	-0.65215	4.16512	2.90184	0.109997	0.366135	175	236	187	173	125	126	177	370	222	263	126
ENSMUSG00000010453.13	Kansl3	0.291028	6.13875	1.63242	0.221621	0.495075	628	495	758	1904	1425	1505	564	768	344	560	1353
ENSMUSG00000010461.17	Eya4	1.02348	1.18895	8.52029	0.0109661	0.159048	23	13	21	93	51	48	8	15	7	22	24
ENSMUSG00000010476.15	Ebf3	0.420946	2.37602	1.07799	0.3163	0.580455	41	30	52	127	97	155	39	29	14	36	133
ENSMUSG00000010492.11	Uckl1os	-0.331921	0.711392	1.08203	0.315428	0.579848	15	8	9	35	28	20	17	26	7	16	29
ENSMUSG00000010505.17	Myt1	0.667436	3.68715	2.91386	0.109326	0.36571	74	55	156	484	374	278	74	116	35	90	259
ENSMUSG00000010517.8	Faf1	-0.130336	4.85459	0.415602	0.529296	0.745563	363	267	368	446	315	417	296	447	208	360	331
ENSMUSG00000010529.7	Gm266	-0.917987	2.12859	5.57093	0.0328851	0.230462	37	56	36	34	27	28	55	69	60	57	53
ENSMUSG00000010538.15	Tsacc	-0.585706	-0.152528	0.94528	0.347004	0.605407	4	14	10	5	6	6	10	7	15	9	4
ENSMUSG00000010554.15	Mettl16	0.168728	4.55324	0.373859	0.550458	0.760612	270	108	178	711	554	386	161	342	103	269	392
ENSMUSG00000010592.10	Dazl	-0.697936	0.683107	1.78428	0.202394	0.476182	22	12	7	30	14	8	25	13	25	20	6
ENSMUSG00000010601.15	Apol7a	1.23478	-0.809098	1.95707	0.183037	0.454967	0	0	1	20	13	18	0	5	1	2	5
ENSMUSG00000010607.9	Pigyl	-0.904054	5.11242	3.42579	0.084846	0.331255	359	452	369	208	148	145	424	567	536	525	255
ENSMUSG00000010608.16	Rbm25	1.12904	5.89007	8.80173	0.00996636	0.153821	487	216	621	3243	1519	1509	312	328	215	438	723
ENSMUSG00000010609.16	Psen2	-0.206143	3.97374	1.04219	0.324191	0.587248	160	139	192	231	153	290	146	230	115	192	244
ENSMUSG00000010651.5	Acaa1b	-0.913045	-0.523006	2.69682	0.122242	0.381478	1	8	7	7	4	3	11	11	3	3	13
ENSMUSG00000010660.4	Plcd1	-0.0965123	3.42286	0.180493	0.677242	0.839787	123	86	98	164	128	242	84	196	62	127	154
ENSMUSG00000010663.6	Fads1	-0.465145	7.49075	5.72634	0.0308782	0.22526	1669	1321	1665	2711	2549	2673	2043	2769	1128	2028	4054
ENSMUSG00000010721.16	Lmbr1	0.372631	4.4809	2.18141	0.161262	0.429713	346	210	361	443	329	274	129	352	87	294	238
ENSMUSG00000010751.16	Tnfrsf22	-0.277797	0.638008	0.478496	0.500128	0.72421	11	7	11	31	27	24	3	25	9	20	34
ENSMUSG00000010755.18	Cars	-0.0424062	4.85163	0.0589609	0.811577	0.91363	290	225	314	621	372	562	239	448	167	321	483
ENSMUSG00000010797.7	Wnt2	-1.00854	1.86967	6.75483	0.0206753	0.19482	49	29	27	38	24	14	59	68	39	46	43
ENSMUSG00000010803.14	Gabra1	0.282816	7.51771	1.18085	0.295073	0.562334	2286	1526	2742	5182	2795	2132	1708	1356	1442	2367	1558
ENSMUSG00000010825.18	Grid2ip	0.273144	3.72437	0.358466	0.558679	0.76555	54	66	149	426	331	278	97	94	31	93	399
ENSMUSG00000010830.9	Kdelr3	-0.889604	0.0846653	4.65385	0.0483695	0.264786	9	10	9	8	6	8	14	17	9	17	8
ENSMUSG00000010911.13	Apip	-0.298266	3.14772	1.03627	0.325521	0.588196	94	79	117	145	100	90	87	154	69	154	56
ENSMUSG00000010914.11	Pdhx	-0.116145	5.31331	0.180177	0.677507	0.839939	583	396	561	567	426	377	349	628	306	595	355
ENSMUSG00000010936.12	Vac14	-0.169677	4.68739	0.670823	0.426138	0.667815	225	204	304	454	371	448	257	319	156	233	585
ENSMUSG00000011008.14	Mcoln2	2.7909	-1.5037	7.23119	0.0173147	0.184705	0	0	3	11	5	9	0	2	0	0	0
ENSMUSG00000011034.7	Slc5a1	-0.150766	1.45937	0.161522	0.693672	0.849561	27	31	41	30	28	31	12	39	12	56	39
ENSMUSG00000011096.18	Akt1s1	-0.817348	5.66992	10.5835	0.00560761	0.123556	491	452	483	570	415	485	709	843	612	662	625
ENSMUSG00000011114.19	Tbrg1	0.0863182	5.40324	0.24149	0.630552	0.810536	458	341	499	841	632	832	403	614	297	461	430
ENSMUSG00000011148.15	Adssl1	-0.0623971	4.98654	0.0391412	0.84594	0.932208	412	452	430	348	229	388	290	420	283	375	345
ENSMUSG00000011154.18	Cfap161	-0.664456	0.607318	2.84236	0.113389	0.370309	16	10	10	13	14	24	15	9	19	26	20
ENSMUSG00000011158.9	Brf1	-0.0270215	4.7746	0.0243867	0.878077	0.947813	257	252	306	508	429	469	250	358	217	241	437
ENSMUSG00000011171.12	Vipr2	0.682108	2.49574	3.47475	0.0828686	0.328269	32	38	56	222	177	81	32	55	20	37	95
ENSMUSG00000011179.9	Odc1	-0.247736	6.63824	0.768461	0.395111	0.644828	1031	1019	965	1236	846	2147	979	1460	1070	1236	904
ENSMUSG00000011254.17	Thg1l	-0.295462	2.30098	0.74198	0.403171	0.651297	73	45	50	63	49	54	24	105	35	90	45
ENSMUSG00000011256.17	Adam19	-0.208792	3.32143	0.317003	0.582092	0.780653	73	44	59	265	182	215	59	126	45	94	319
ENSMUSG00000011257.20	Pabpc4	-0.770606	4.82789	16.6795	0.00106106	0.0544006	244	202	246	377	317	346	399	483	305	320	428
ENSMUSG00000011263.17	Exoc3l2	-0.461433	-0.587142	0.988764	0.336492	0.597403	7	2	5	12	6	5	11	4	5	6	5
ENSMUSG00000011267.9	Zfp296	-0.101997	0.974964	0.120985	0.733011	0.871157	25	11	27	32	23	24	17	35	10	19	25
ENSMUSG00000011305.12	Plin5	-0.605079	0.0375761	2.69679	0.122244	0.381478	9	5	8	10	9	17	14	12	10	7	14
ENSMUSG00000011306.8	Sugp1	-0.253024	5.60784	1.45671	0.246944	0.51808	508	511	548	740	517	695	478	635	493	493	736
ENSMUSG00000011382.9	Dhdh	0.543592	2.39595	1.59309	0.226983	0.500557	27	23	39	218	118	140	22	43	24	36	114
ENSMUSG00000011427.17	Zfp790	0.276626	3.55845	0.859723	0.369127	0.623947	166	85	178	262	220	126	74	224	34	157	121
ENSMUSG00000011463.6	Cpb1	-0.588028	-1.79653	0.323305	0.578406	0.778545	2	2	3	1	0	0	2	0	4	2	0
ENSMUSG00000011486.15	Slc25a41	1.7156	-1.70426	3.5364	0.0804566	0.324889	1	1	1	10	5	1	0	1	2	0	0
ENSMUSG00000011589.10	Fsd1	-0.870521	5.01503	8.37682	0.0115199	0.161333	319	334	289	284	299	204	407	584	411	393	446
ENSMUSG00000011658.17	Fuz	-0.499201	4.45655	9.11826	0.00896515	0.147978	189	177	172	401	297	291	235	350	201	280	343
ENSMUSG00000011751.17	Sptbn4	-0.00300313	7.28537	9.49464e-05	0.992359	0.997796	992	899	1321	4671	3539	2727	1389	1637	998	1092	3773
ENSMUSG00000011752.8	Pgam1	-0.486066	8.85696	3.05838	0.101639	0.354983	5969	4617	5442	4837	4376	4033	5214	8086	3864	6396	6358
ENSMUSG00000011831.17	Evi5	0.571874	5.00581	5.50118	0.033835	0.233778	380	186	397	1109	729	532	156	357	145	390	390
ENSMUSG00000011832.17	Evi5l	-0.421659	6.48707	5.21224	0.0381272	0.241771	832	769	852	1431	1230	1188	1059	1252	709	886	1832
ENSMUSG00000011837.5	Snapc2	-0.632516	4.43378	8.42079	0.0113468	0.160672	211	183	223	242	209	273	313	374	169	241	354
ENSMUSG00000011877.14	Git1	-0.855293	8.00739	15.4924	0.00142406	0.0650043	2040	1816	2176	3055	2925	3146	3823	4134	2629	2411	5354
ENSMUSG00000011884.14	Gltp	-0.281461	4.98237	1.71709	0.210624	0.484653	280	213	253	606	395	704	396	476	189	341	533
ENSMUSG00000011958.18	Bnip2	0.562378	4.31287	5.11951	0.0396373	0.245892	257	166	288	494	345	382	95	294	70	272	169
ENSMUSG00000011960.13	Ccnt1	0.854985	4.86299	6.49419	0.0228318	0.202402	235	123	307	1209	747	783	147	272	98	224	428
ENSMUSG00000012017.5	Scarf2	-0.478028	1.87424	2.62421	0.126974	0.387443	31	29	32	44	35	71	50	35	29	37	74
ENSMUSG00000012076.9	Brms1l	0.03437	5.27794	0.0313841	0.861859	0.939912	504	306	388	967	691	422	309	584	258	483	477
ENSMUSG00000012114.18	Med15	0.188517	5.36253	0.376246	0.549205	0.759911	303	234	384	1082	835	1049	359	474	169	279	948
ENSMUSG00000012117.14	Dhdds	-0.259444	6.02221	2.05791	0.172819	0.443226	739	586	728	1040	777	877	672	840	545	704	1118
ENSMUSG00000012123.18	Crybg2	-0.00594147	0.133753	0.00024863	0.987636	0.99682	8	13	16	9	10	16	6	11	7	15	13
ENSMUSG00000012126.17	Ubxn11	-0.452453	3.32076	4.80091	0.0453879	0.259017	121	76	84	174	101	130	92	149	103	124	153
ENSMUSG00000012187.14	Mogat1	-0.525147	-0.784232	0.691237	0.419344	0.662812	7	7	3	5	4	1	5	6	9	3	3
ENSMUSG00000012211.14	Tex22	0.165536	-2.20232	0.0225156	0.882809	0.94996	3	0	0	1	0	1	1	0	0	0	2
ENSMUSG00000012296.17	Tjap1	0.102582	4.1836	0.159837	0.695185	0.850397	153	108	164	497	395	335	145	275	71	176	347
ENSMUSG00000012350.16	Ehf	2.92364	-1.81329	13.3097	0.00253304	0.0881379	3	1	2	4	2	5	0	0	0	1	0
ENSMUSG00000012405.17	Rpl15	-0.619584	8.21632	1.76416	0.204814	0.478591	3353	4158	3290	2203	1784	1827	3285	4272	4624	4109	1719
ENSMUSG00000012422.15	Tmem167	-0.228437	5.24895	0.558602	0.466878	0.699589	492	364	424	708	490	305	353	475	437	578	246
ENSMUSG00000012428.10	Steap4	3.14294	1.53728	16.2612	0.00117532	0.0573993	7	10	14	193	94	135	3	12	0	3	12
ENSMUSG00000012429.10	Mplkip	0.0140482	3.05657	0.00241502	0.961482	0.98417	122	73	102	179	106	78	62	118	71	122	58
ENSMUSG00000012443.5	Kif11	0.745499	-0.0914771	2.38725	0.14406	0.409261	10	6	8	22	22	13	4	4	6	13	2
ENSMUSG00000012483.5	Rpa3	-0.733641	2.30479	1.76649	0.204532	0.478169	56	64	43	57	33	16	62	58	93	60	16
ENSMUSG00000012519.15	Mlkl	5.44642	1.60436	40.443	1.56624e-05	0.00603363	11	6	43	167	92	172	0	1	0	3	2
ENSMUSG00000012520.11	Phox2b	0.726882	-0.47403	1.42434	0.252019	0.521956	10	10	9	7	4	12	6	1	4	1	10
ENSMUSG00000012535.15	Tnpo3	0.261858	5.71913	1.47345	0.244374	0.516014	770	442	714	1198	780	742	324	835	238	716	599
ENSMUSG00000012609.20	Ttll5	-0.196866	5.40246	1.30281	0.272362	0.541506	368	357	479	809	625	633	450	560	247	498	789
ENSMUSG00000012640.17	Zfp715	0.366578	4.09343	2.90312	0.109925	0.366116	243	111	190	518	306	256	112	194	98	223	177
ENSMUSG00000012705.17	Retn	2.23044	-1.75441	5.10015	0.0399614	0.246659	1	1	0	10	4	3	0	0	0	2	0
ENSMUSG00000012819.17	Cdh23	-0.105002	1.44914	0.0446503	0.835615	0.927307	15	11	16	48	40	92	20	17	11	19	92
ENSMUSG00000012848.16	Rps5	-0.76459	8.53049	2.25114	0.155162	0.422658	3583	5277	3992	2162	1717	2440	4090	5309	6563	4979	2036
ENSMUSG00000012889.9	Podnl1	1.80951	-1.36061	4.93366	0.0428804	0.254537	0	4	4	5	4	11	0	1	1	0	3
ENSMUSG00000013033.17	Adgrl1	-0.619035	8.55109	5.86823	0.0291698	0.220425	2487	2282	2858	7124	6243	5050	4655	4718	3376	3143	9737
ENSMUSG00000013076.18	Amotl1	-0.00151409	5.69205	1.88743e-05	0.996593	0.997992	291	277	340	1264	1121	1396	486	529	293	371	1279
ENSMUSG00000013089.16	Etv5	-0.241834	5.75603	1.13563	0.304153	0.570116	507	279	522	1209	949	860	586	779	272	538	1209
ENSMUSG00000013091.6	Tmem190	0.554908	-1.95063	0.304238	0.589711	0.785538	2	1	0	5	2	0	3	0	0	1	0
ENSMUSG00000013150.16	Gfod2	-0.69101	4.69531	7.46979	0.0158717	0.178478	257	250	250	316	269	206	369	424	277	314	318
ENSMUSG00000013155.11	Enkd1	-0.473592	2.67074	5.15145	0.0391094	0.24454	67	51	59	105	71	75	77	114	46	78	88
ENSMUSG00000013158.7	4933405L10Rik	0.14473	-1.55961	0.0229804	0.881616	0.94924	2	2	0	12	1	0	0	7	0	1	2
ENSMUSG00000013160.8	Atp6v0d1	-0.504293	7.46914	4.65368	0.0483729	0.264786	2078	1448	2233	2091	1891	1725	2222	3147	1271	2349	2624
ENSMUSG00000013236.18	Ptprs	-0.113322	7.9455	0.154511	0.70003	0.853355	2020	1351	2272	6053	4904	4395	2095	3138	1119	2164	6698
ENSMUSG00000013275.10	Slc41a1	0.277948	6.54583	1.96183	0.182538	0.454432	826	826	1050	2144	1477	2301	813	1091	555	763	1417
ENSMUSG00000013367.6	Iglon5	-0.435835	5.09819	3.42115	0.0850363	0.331723	263	282	331	557	467	523	438	402	218	300	887
ENSMUSG00000013415.10	Igf2bp1	0.543013	-2.26421	0.278632	0.605654	0.795356	0	0	0	1	3	1	0	1	1	0	0
ENSMUSG00000013419.8	Zfp651	-0.6431	6.65535	7.77351	0.0142314	0.171921	821	898	1010	1197	1204	1189	1382	1351	1095	918	1888
ENSMUSG00000013465.20	Nelfb	-0.427796	5.57662	5.43101	0.0348231	0.234487	503	421	507	709	610	514	560	725	355	554	862
ENSMUSG00000013483.15	Card14	0.899819	-0.963633	1.76043	0.205268	0.47889	2	7	2	9	4	13	1	3	0	1	9
ENSMUSG00000013495.16	Tmem175	-0.216724	5.01651	0.90262	0.357784	0.614052	395	318	418	528	358	327	223	544	250	488	434
ENSMUSG00000013523.14	Bcas1	-0.634326	7.57165	11.5147	0.00422958	0.111937	1874	1507	1689	2513	1981	2586	2354	2942	1686	2604	3222
ENSMUSG00000013539.15	Tango2	-0.624698	6.15525	5.8185	0.0297557	0.221757	818	743	651	756	658	670	751	1205	778	1019	928
ENSMUSG00000013584.6	Aldh1a2	0.862883	3.23983	5.3786	0.035583	0.236157	45	68	88	315	244	306	76	92	30	43	122
ENSMUSG00000013593.13	Ndufs2	-0.417721	7.80094	1.43173	0.25085	0.521137	2827	2894	2734	2006	1644	1728	2260	3559	2317	3062	2447
ENSMUSG00000013611.15	Snx31	-0.417914	-0.865426	0.604537	0.449463	0.685242	2	5	4	8	8	1	6	4	4	7	3
ENSMUSG00000013622.16	Atraid	-0.298109	5.88585	0.759962	0.39767	0.646899	740	760	795	667	445	487	458	1052	554	944	523
ENSMUSG00000013629.17	Cad	-0.093535	3.92102	0.0528909	0.821348	0.919799	86	68	120	436	329	298	167	136	56	88	470
ENSMUSG00000013646.18	Sh3bp5l	-0.376071	5.79457	3.93317	0.0667876	0.301017	555	551	542	903	758	573	611	788	495	626	903
ENSMUSG00000013662.7	Atad1	0.517709	5.90146	6.29518	0.0246553	0.209763	808	543	859	1636	857	1056	413	569	395	722	462
ENSMUSG00000013663.8	Pten	0.513085	6.70943	5.94082	0.0283384	0.218541	1306	636	1418	3072	2280	1777	649	1077	600	1242	1082
ENSMUSG00000013698.13	Pea15a	-0.453164	9.19894	3.59705	0.0781651	0.321029	6392	6152	6290	7493	6186	6074	6431	9375	5372	7498	8520
ENSMUSG00000013701.14	Timm23	-0.505965	6.36163	1.58789	0.227705	0.501111	1102	957	1008	727	544	608	799	1415	958	1389	497
ENSMUSG00000013707.4	Tnfaip8l2	-0.0862033	1.38017	0.0675528	0.79862	0.906622	36	25	32	30	21	40	25	33	23	31	21
ENSMUSG00000013736.17	Trnt1	0.197439	4.66174	0.563596	0.46493	0.697847	342	258	344	585	333	290	207	277	206	360	163
ENSMUSG00000013766.12	Ly6g6e	-0.159427	1.61392	0.226758	0.641096	0.816557	18	42	30	60	38	33	36	52	11	39	35
ENSMUSG00000013787.16	Ehmt2	-0.583881	7.3261	6.73975	0.0207935	0.19482	1392	1491	1612	2174	1840	1808	2047	2233	1813	1535	2681
ENSMUSG00000013822.8	Elof1	-0.721324	5.53312	3.52092	0.0810542	0.325905	526	539	529	368	315	261	505	935	519	754	387
ENSMUSG00000013833.16	Med16	-0.619325	5.64342	7.2414	0.0172499	0.184705	447	478	544	574	548	503	661	705	511	512	896
ENSMUSG00000013846.11	St3gal1	0.539969	4.53463	1.29925	0.272992	0.542038	138	75	178	808	623	720	174	185	57	122	571
ENSMUSG00000013858.15	Tmem259	-0.464131	6.95235	3.44598	0.0840238	0.32963	1222	1349	1444	1494	1238	1284	1494	1897	1282	1396	1599
ENSMUSG00000013878.19	Rnf170	0.327964	4.73497	2.25782	0.154593	0.421859	377	218	426	606	401	348	149	323	187	344	264
ENSMUSG00000013921.16	Clip3	0.0265978	8.01599	0.00408254	0.949934	0.978462	1504	1164	2075	7117	5457	6685	2548	2275	1114	1336	7857
ENSMUSG00000013936.13	Myl2	0.489996	-1.07166	0.677608	0.423861	0.666374	6	6	7	2	4	2	2	4	3	2	3
ENSMUSG00000013973.13	Dedd	-0.208004	4.70791	1.63646	0.221081	0.494618	286	207	259	469	365	412	259	414	201	323	332
ENSMUSG00000013974.4	Mcemp1	1.48549	-0.752027	7.48892	0.0157621	0.178435	4	3	10	12	7	15	2	1	2	5	1
ENSMUSG00000013997.11	Nit1	-0.173385	5.13089	0.725737	0.40824	0.65502	451	305	436	624	462	347	307	609	226	469	469
ENSMUSG00000014030.16	Pax5	1.52396	0.229872	5.34666	0.0360558	0.237311	6	1	9	48	28	42	5	3	1	3	16
ENSMUSG00000014039.19	Prdm15	0.253215	3.83625	0.771602	0.394171	0.644519	128	74	181	409	342	212	77	216	58	125	285
ENSMUSG00000014074.18	Rnf168	-0.0102134	4.95421	0.00291272	0.957702	0.982052	427	246	379	535	458	433	261	494	210	399	340
ENSMUSG00000014075.16	Dynlt2b	-0.0087102	2.91457	0.000593711	0.980896	0.993832	91	107	105	120	68	62	59	84	76	111	52
ENSMUSG00000014077.14	Chp1	-0.159861	6.81468	0.705007	0.414856	0.660158	1408	802	1386	1905	1651	1514	1104	1723	624	1273	2054
ENSMUSG00000014158.13	Trpv4	0.180832	2.29638	0.245107	0.628025	0.809262	32	26	35	94	73	186	48	44	33	44	70
ENSMUSG00000014164.16	Klhl3	0.497182	4.65414	1.05919	0.320411	0.584219	183	78	193	972	791	523	118	259	60	142	695
ENSMUSG00000014177.11	Tvp23b	-0.0556541	4.12889	0.0328598	0.858685	0.938743	277	172	241	270	227	117	137	248	141	272	152
ENSMUSG00000014195.17	Dnajc7	0.324234	6.7028	2.7459	0.119165	0.377993	1312	969	1333	2388	1768	1675	552	1525	572	1344	1183
ENSMUSG00000014198.16	Zfp385c	0.0909636	3.15577	0.107364	0.74789	0.879515	47	99	138	174	122	155	80	88	42	101	168
ENSMUSG00000014226.11	Cacybp	-0.379323	5.96971	0.962158	0.342869	0.602232	797	701	645	996	549	522	799	631	820	934	289
ENSMUSG00000014232.15	Cluap1	0.115088	3.81827	0.307191	0.58793	0.784515	188	143	181	274	182	185	98	221	90	180	152
ENSMUSG00000014243.6	Zswim7	-0.166879	3.00798	0.120964	0.733033	0.871157	115	121	118	61	44	63	53	118	100	113	45
ENSMUSG00000014245.9	Pigl	0.507385	1.67898	1.05202	0.321997	0.585616	26	4	23	132	74	76	12	40	10	25	60
ENSMUSG00000014294.5	Ndufa2	-0.767676	6.3308	2.05956	0.172658	0.442989	856	1123	934	477	390	344	760	1299	1350	1321	370
ENSMUSG00000014301.14	Pam16	-0.565184	4.34076	2.5829	0.129765	0.391817	270	216	220	199	176	131	182	386	232	322	166
ENSMUSG00000014303.14	Glis2	-0.473038	3.40575	3.03403	0.102887	0.357012	72	64	83	223	160	171	108	152	55	97	311
ENSMUSG00000014313.16	Cox6c	-0.91485	8.57519	2.40904	0.142375	0.407126	4268	5195	3815	1991	1557	1273	4049	5673	7417	5719	1591
ENSMUSG00000014329.15	Bicc1	0.78184	2.61029	7.10752	0.0181221	0.187948	55	37	76	165	124	189	35	79	18	44	71
ENSMUSG00000014349.8	Ube2z	-0.381583	6.71193	3.14716	0.0972395	0.34941	1121	1078	1119	1354	1175	1288	1166	1418	1009	1142	1682
ENSMUSG00000014353.16	Tmem87b	0.492164	5.00462	8.70645	0.0102926	0.154928	391	282	450	800	570	581	254	349	165	350	312
ENSMUSG00000014355.11	Anapc1	0.162396	5.97125	0.652782	0.43229	0.672667	659	454	735	1422	1139	1179	423	805	297	671	1221
ENSMUSG00000014361.6	Mertk	1.42987	4.18797	10.184	0.00635225	0.130453	213	71	186	780	572	530	38	171	21	130	219
ENSMUSG00000014402.16	Tsg101	-0.13999	5.88385	0.215197	0.649672	0.821437	800	766	784	633	484	663	548	985	458	771	603
ENSMUSG00000014418.17	Hps5	0.435306	3.91223	2.45285	0.139061	0.402783	127	87	144	499	347	326	93	183	55	140	260
ENSMUSG00000014426.10	Map3k4	0.0910045	5.13365	0.157784	0.697042	0.851518	352	259	373	772	689	612	286	410	176	280	807
ENSMUSG00000014444.18	Piezo1	0.869302	2.93757	2.85329	0.112756	0.369846	35	31	47	232	197	344	60	42	28	27	135
ENSMUSG00000014470.5	Rnf166	-0.569185	4.93973	6.18676	0.0257197	0.212217	278	310	341	417	296	298	399	488	293	398	395
ENSMUSG00000014496.9	Ankrd28	0.423274	5.66853	5.61	0.0323666	0.229351	554	376	643	1448	906	1024	348	573	290	600	541
ENSMUSG00000014498.10	Ankrd52	0.442848	5.68204	0.499732	0.490922	0.716918	198	135	272	2021	1407	1676	311	311	116	182	1766
ENSMUSG00000014503.16	Pkd2l2	0.495197	1.30285	1.94867	0.183922	0.455644	33	8	29	87	50	29	15	23	9	28	31
ENSMUSG00000014504.17	Srp19	-0.0956668	4.67576	0.0905637	0.767772	0.890228	345	317	346	391	206	251	207	372	250	361	189
ENSMUSG00000014543.15	Klra17	2.14815	-2.10818	4.72072	0.0469861	0.26114	0	0	1	4	3	2	0	1	0	0	0
ENSMUSG00000014547.11	Wdfy2	0.379265	4.84344	1.86538	0.193	0.465376	288	177	326	748	573	679	175	415	85	242	556
ENSMUSG00000014550.15	Rbsn	0.126061	5.73426	0.535749	0.475967	0.706082	617	398	630	1074	807	1084	403	742	297	576	851
ENSMUSG00000014551.9	Mrps25	-0.453714	6.0701	2.58081	0.129909	0.391989	852	722	746	729	679	555	687	1192	668	928	716
ENSMUSG00000014554.14	Dguok	-0.230041	3.59562	1.31271	0.270626	0.539647	119	89	128	281	180	136	77	208	92	159	196
ENSMUSG00000014592.22	Camta1	0.615401	6.99719	3.73869	0.0731098	0.312641	1115	575	1381	4674	3263	2954	825	1013	536	982	2340
ENSMUSG00000014599.11	Csf1	1.58048	5.35764	14.2618	0.00195872	0.0762572	232	207	438	1588	1096	1935	162	269	98	165	445
ENSMUSG00000014601.14	Strip1	-0.458319	6.08694	6.20998	0.0254873	0.211835	690	594	754	971	819	760	797	1116	489	821	1198
ENSMUSG00000014602.16	Kif1a	-0.0566734	9.44828	0.0276518	0.870247	0.944074	5254	4170	5877	17667	14374	13666	5624	7338	3438	4737	21276
ENSMUSG00000014603.4	Alx3	-0.423315	0.579094	1.8006	0.200457	0.4738	9	12	17	19	21	16	19	17	12	12	24
ENSMUSG00000014606.15	Slc25a11	-0.431334	7.09992	1.33773	0.266299	0.535553	1772	1773	1810	976	911	1085	1509	2286	1284	1922	1502
ENSMUSG00000014633.16	Cmc2	-0.259715	3.23815	0.584245	0.45702	0.69195	114	126	118	105	95	68	71	165	77	155	88
ENSMUSG00000014668.16	Chfr	0.197369	4.5053	1.00034	0.333772	0.59507	247	154	292	569	407	374	139	336	113	241	380
ENSMUSG00000014686.9	Ceacam16	-1.09131	-1.02947	4.13584	0.0608771	0.289268	2	3	1	9	3	1	5	6	5	2	8
ENSMUSG00000014704.11	Hoxa2	0.576191	-1.01828	0.642593	0.435828	0.675056	7	4	3	3	5	9	1	0	2	1	11
ENSMUSG00000014747.7	Ankrd53	0.783064	-0.38945	1.36426	0.261813	0.531011	3	2	6	28	20	9	3	1	1	2	18
ENSMUSG00000014748.14	Tex261	-0.272286	5.89058	2.378	0.144783	0.410004	550	575	703	979	746	773	641	827	446	664	1012
ENSMUSG00000014763.9	Fam120b	0.18247	5.76596	0.956997	0.344126	0.603404	643	388	602	1368	1068	822	418	789	263	556	872
ENSMUSG00000014767.18	Tbp	0.54034	4.49937	6.94892	0.0192222	0.191441	295	154	264	685	442	431	128	281	94	239	290
ENSMUSG00000014769.11	Psmb1	-0.407778	7.1956	0.917081	0.354076	0.611135	1832	2040	1836	1183	863	1226	1342	2252	1865	2211	927
ENSMUSG00000014771.14	Pdcd2	-0.280405	3.77837	0.533623	0.476828	0.706721	192	180	178	113	91	131	124	227	149	177	107
ENSMUSG00000014773.14	Dll1	0.684133	2.91269	3.90035	0.0678076	0.302282	33	54	66	255	183	223	49	69	40	47	102
ENSMUSG00000014776.8	Nol3	-0.415892	4.54194	3.13977	0.0975969	0.349952	265	245	270	275	242	230	263	365	196	295	334
ENSMUSG00000014778.11	Fhod1	0.960768	2.29216	2.10075	0.168696	0.437655	29	4	39	196	160	157	26	32	3	21	110
ENSMUSG00000014782.17	Plekhg4	1.00256	2.06177	3.69682	0.0745627	0.315608	25	14	24	206	151	82	16	32	9	21	77
ENSMUSG00000014786.9	Slc9a5	-0.180338	5.00515	0.743433	0.402722	0.651044	232	228	349	707	547	522	328	412	205	287	697
ENSMUSG00000014791.11	Elmo3	0.250483	1.98813	1.04143	0.32436	0.587334	32	39	62	72	56	73	27	54	23	33	57
ENSMUSG00000014813.10	Stc1	0.477422	1.19896	2.15818	0.16336	0.432108	25	13	20	76	42	41	14	26	7	16	39
ENSMUSG00000014837.16	4931428F04Rik	-0.343176	3.84251	1.45361	0.247425	0.518543	109	76	89	410	247	214	127	191	100	124	380
ENSMUSG00000014846.13	Tppp3	-0.0710366	6.79443	0.0309579	0.86279	0.940492	1304	2005	1413	1029	801	1027	1213	1193	1229	1095	1007
ENSMUSG00000014850.16	Msh3	0.514964	3.572	4.85962	0.0442584	0.256701	173	82	182	304	182	214	49	141	70	143	128
ENSMUSG00000014852.17	Adamts13	-0.70314	-0.0187159	1.07	0.318039	0.582091	16	10	10	5	2	4	8	12	20	8	4
ENSMUSG00000014856.13	Tmem208	-0.870379	4.71546	8.18832	0.0122973	0.164038	259	247	228	255	219	227	292	408	406	379	269
ENSMUSG00000014859.10	E2f4	0.0511642	4.19145	0.0804513	0.780732	0.897175	174	130	219	420	300	323	135	251	112	182	329
ENSMUSG00000014867.10	Surf4	-0.312241	6.22451	2.584	0.12969	0.391778	727	724	819	1056	854	1155	853	1063	663	792	1113
ENSMUSG00000014873.16	Surf2	-0.0159354	4.45569	0.00645261	0.937084	0.972537	267	221	269	375	297	293	184	397	120	261	278
ENSMUSG00000014905.5	Dnajb9	0.318144	5.12268	2.95801	0.106905	0.362256	500	350	440	760	491	542	301	351	225	402	361
ENSMUSG00000014907.11	Naf1	-0.00501458	3.14174	0.000405408	0.984213	0.995254	86	55	71	217	177	149	104	109	69	61	121
ENSMUSG00000014932.16	Yes1	0.481885	2.66348	2.78016	0.117073	0.375302	69	54	60	258	101	88	45	43	49	67	61
ENSMUSG00000014956.16	Ppp1cb	-0.018567	7.51048	0.00461232	0.94679	0.977515	2424	1576	2351	3845	2608	1842	2136	1761	1673	2372	1365
ENSMUSG00000014959.13	Gorasp2	-0.312142	6.34511	1.82643	0.19744	0.470415	1021	795	993	923	861	989	928	1360	592	973	1122
ENSMUSG00000014980.15	Tsen15	-0.255024	4.00255	1.61914	0.223413	0.496677	191	140	174	277	217	171	151	237	144	216	185
ENSMUSG00000015002.19	Efr3a	0.395553	6.41447	3.83422	0.0699194	0.305553	1072	533	1255	2032	1571	1631	597	1054	358	894	1265
ENSMUSG00000015013.10	Trappc2l	-0.482588	5.21124	1.01471	0.330437	0.591827	523	518	491	217	188	183	356	668	393	604	276
ENSMUSG00000015016.9	Acsf3	-0.372625	4.12449	3.50684	0.0816026	0.326882	158	139	197	291	216	243	219	205	129	174	358
ENSMUSG00000015023.8	Ddx19a	0.0964115	3.97197	0.179116	0.678399	0.840514	153	108	170	365	278	299	135	205	62	148	322
ENSMUSG00000015027.12	Galns	-0.186629	2.76324	0.54955	0.470442	0.702472	50	59	82	91	79	147	76	88	47	63	117
ENSMUSG00000015053.15	Gata2	0.34184	2.69353	1.12474	0.306398	0.571908	39	58	81	124	69	221	63	68	33	51	88
ENSMUSG00000015083.12	C8g	-0.105556	0.482025	0.0839605	0.776139	0.894513	13	15	21	23	10	12	11	18	12	16	12
ENSMUSG00000015085.9	Entpd2	-0.57242	3.80652	2.21219	0.158533	0.42663	145	206	157	109	96	82	198	216	124	151	213
ENSMUSG00000015087.15	Rabl6	-0.680047	7.44376	7.77576	0.01422	0.171921	1580	1681	1584	2170	1837	1773	2212	2513	2202	1934	2451
ENSMUSG00000015090.14	Ptgds	0.345398	9.86438	2.00188	0.178405	0.44914	11213	12635	14674	15971	12373	12634	7126	12339	5533	9253	10598
ENSMUSG00000015092.10	Edf1	-0.768198	6.73191	5.07175	0.0404426	0.247792	1073	1168	1159	886	790	769	1549	1877	1238	1379	1030
ENSMUSG00000015093.16	Clic3	0.712345	0.169938	3.87686	0.0685488	0.30355	9	9	15	19	22	23	5	9	2	10	15
ENSMUSG00000015094.17	Npdc1	-0.502842	7.58985	4.45818	0.052701	0.273273	2037	1894	2247	2311	1868	2030	2264	3291	1741	2599	2426
ENSMUSG00000015095.13	Fbxw5	-0.483049	6.30744	6.51394	0.0226596	0.201736	812	733	812	1026	936	930	800	1349	701	951	1345
ENSMUSG00000015112.16	Slc25a13	0.450644	1.9531	2.92287	0.108827	0.364868	61	33	46	80	44	81	20	49	27	35	38
ENSMUSG00000015120.16	Ube2i	0.123175	5.98177	0.416556	0.528831	0.745337	682	470	761	1259	995	1321	511	911	311	601	1124
ENSMUSG00000015126.10	Tsr3	-0.377463	4.44194	1.1379	0.303689	0.56992	266	272	277	203	142	221	172	377	234	334	190
ENSMUSG00000015127.15	Unkl	0.184377	5.22824	0.700956	0.416168	0.661062	394	259	427	933	690	689	322	413	186	291	782
ENSMUSG00000015133.18	Lrrk1	0.471751	2.35041	1.89378	0.189842	0.462119	33	34	63	124	92	149	27	50	15	45	105
ENSMUSG00000015134.16	Aldh1a3	-0.502056	0.0778995	2.14993	0.164113	0.432627	8	10	12	11	9	9	11	16	6	11	16
ENSMUSG00000015143.16	Actn1	0.322305	5.26912	0.784114	0.390462	0.641348	267	143	282	1280	867	1126	290	459	163	284	774
ENSMUSG00000015149.15	Sirt2	-0.135323	7.1819	0.452785	0.511691	0.732845	1687	1522	1788	2323	1630	1943	1528	2154	984	1762	1932
ENSMUSG00000015165.17	Hnrnpl	0.0279276	7.06144	0.0158195	0.901652	0.959082	1181	840	1396	3534	2411	2437	1068	2019	620	1371	2606
ENSMUSG00000015176.12	Nolc1	0.202867	5.16304	0.693082	0.418738	0.66244	361	206	401	962	671	725	289	483	120	391	644
ENSMUSG00000015189.13	Casd1	0.0806436	5.31347	0.157076	0.697685	0.851906	547	331	528	816	621	448	342	553	233	562	426
ENSMUSG00000015202.14	Cnksr3	0.20173	3.8738	0.814168	0.381765	0.634076	106	143	212	327	243	253	144	154	66	140	251
ENSMUSG00000015214.15	Mtmr1	0.523546	5.1478	7.50406	0.0156761	0.17803	474	285	503	927	636	614	211	475	153	414	362
ENSMUSG00000015217.12	Hmgb3	-0.160979	4.48011	0.276088	0.607289	0.796618	304	250	302	221	153	340	185	358	146	352	263
ENSMUSG00000015222.19	Map2	0.443913	8.86217	3.33551	0.0886421	0.336917	4710	3015	4549	14281	11684	8779	3499	4045	3165	4434	5789
ENSMUSG00000015224.11	Cyp2j9	0.396474	5.06819	4.6493	0.0484652	0.264922	361	361	439	733	601	579	245	458	165	402	314
ENSMUSG00000015243.5	Abca1	1.02656	5.27092	14.1731	0.00200539	0.0774343	298	245	539	1484	891	1090	237	248	148	330	391
ENSMUSG00000015247.11	Nipsnap3b	0.0193498	2.99395	0.00399889	0.950449	0.978701	100	83	119	106	65	134	84	117	36	120	70
ENSMUSG00000015289.5	Lage3	-0.51846	3.66494	2.38056	0.144583	0.409952	127	136	166	152	101	107	106	177	150	241	105
ENSMUSG00000015290.16	Ubl4a	-0.337406	6.0872	2.64404	0.125659	0.385736	816	651	773	961	784	729	675	1185	455	976	976
ENSMUSG00000015291.11	Gdi1	0.0541135	8.37265	0.0782776	0.783632	0.898839	4010	2776	4260	6560	5288	4639	2500	5040	1756	3775	5540
ENSMUSG00000015305.7	Sash1	0.284434	6.01018	0.598891	0.451544	0.687015	462	296	502	1958	1555	1679	595	575	223	460	1508
ENSMUSG00000015312.10	Gadd45b	0.803507	4.02487	5.84051	0.0294948	0.220931	133	99	222	436	226	654	76	206	76	171	108
ENSMUSG00000015314.11	Slamf6	1.96254	-0.776602	5.95024	0.0282326	0.218541	2	1	2	5	13	32	2	2	2	1	1
ENSMUSG00000015316.12	Slamf1	1.11831	-1.30067	2.83874	0.1136	0.370805	4	2	2	4	2	13	2	3	0	2	1
ENSMUSG00000015335.17	Zdhhc12	-0.506752	2.44244	3.75413	0.0725826	0.311404	51	51	66	68	45	64	61	97	49	68	65
ENSMUSG00000015337.6	Endog	-0.634094	4.06838	3.27347	0.091369	0.341368	155	215	184	142	121	148	200	263	211	227	157
ENSMUSG00000015340.11	Cybb	3.87687	2.20435	26.6643	0.000132304	0.016576	13	6	64	215	143	294	3	6	3	11	5
ENSMUSG00000015341.18	Golga7	-0.452507	6.76549	2.54897	0.132115	0.394632	1265	1185	1214	1388	999	988	1317	1628	1115	1557	1006
ENSMUSG00000015342.7	Xk	0.86986	3.33718	3.71274	0.0740063	0.314451	106	28	117	382	254	270	44	54	25	61	230
ENSMUSG00000015354.9	Pcolce2	-0.0327878	3.24042	0.00604256	0.939112	0.97329	125	158	149	93	57	62	86	137	86	102	86
ENSMUSG00000015355.14	Cd48	0.913066	0.245496	2.91765	0.109115	0.365383	12	11	13	23	11	38	6	6	14	3	4
ENSMUSG00000015357.11	Clpx	0.35256	4.54599	2.74579	0.119172	0.377993	357	199	340	478	336	370	183	281	139	299	188
ENSMUSG00000015363.14	Trabd	-0.31136	4.97363	2.34031	0.147774	0.41319	282	341	341	507	346	415	358	404	278	324	518
ENSMUSG00000015377.11	Dennd6b	0.429436	6.32738	2.09381	0.169356	0.438585	631	415	957	2164	1504	2451	449	1009	316	733	1468
ENSMUSG00000015396.5	Cd83	-0.0963651	5.32867	0.0654008	0.801779	0.907937	556	633	511	369	320	360	430	434	428	447	371
ENSMUSG00000015401.13	Cltrn	-0.194313	-0.73161	0.151203	0.703089	0.855236	5	5	8	7	5	3	4	6	6	7	2
ENSMUSG00000015405.16	Ace2	0.148951	0.692146	0.249539	0.62496	0.807411	10	10	24	33	22	30	10	18	10	17	21
ENSMUSG00000015437.6	Gzmb	6.21023	2.30442	21.7434	0.00034196	0.0288541	3	6	31	61	157	548	0	5	0	1	0
ENSMUSG00000015451.17	C4a	0.939548	1.00501	2.70923	0.121455	0.380317	9	2	14	100	59	45	11	21	3	15	20
ENSMUSG00000015452.15	Ager	0.892302	0.165107	3.03045	0.103072	0.357287	7	8	13	35	15	28	1	6	11	10	5
ENSMUSG00000015461.16	Atf6b	-0.513068	5.63004	9.23342	0.00862998	0.145597	484	384	458	846	644	565	605	801	454	575	743
ENSMUSG00000015467.15	Egfl8	-0.640259	1.0663	3.16046	0.0966008	0.348497	26	21	18	17	22	12	26	29	14	30	34
ENSMUSG00000015468.15	Notch4	0.22716	2.9184	0.653665	0.431986	0.672446	62	66	55	174	126	202	78	67	42	58	128
ENSMUSG00000015474.17	Ppt2	-0.385121	4.71955	4.71682	0.0470655	0.261458	248	209	283	514	374	266	297	381	232	297	417
ENSMUSG00000015476.7	Prrt1	0.01818	6.43958	0.00271513	0.959161	0.982948	552	395	653	2695	2156	1616	910	1037	380	597	2066
ENSMUSG00000015478.14	Rnf5	-0.53578	5.29586	4.09537	0.0620063	0.29139	450	405	440	503	355	309	437	732	317	624	456
ENSMUSG00000015484.4	Fam163a	-0.599438	3.25764	6.73819	0.0208057	0.19482	93	79	90	142	127	79	101	174	73	90	217
ENSMUSG00000015488.15	Cacfd1	-0.0285004	5.1262	0.0283642	0.868603	0.943205	301	328	386	735	549	568	273	455	289	361	546
ENSMUSG00000015501.11	Hivep2	0.525255	7.19	2.5672	0.130846	0.39315	1319	596	1420	4892	3896	3453	787	1625	535	1364	2631
ENSMUSG00000015522.19	Arnt	0.670277	4.79248	2.72247	0.120622	0.379446	199	133	278	1159	690	652	119	334	52	218	564
ENSMUSG00000015533.10	Itga2	1.29346	-1.28692	2.45507	0.138895	0.402564	0	1	0	12	10	8	2	2	1	1	1
ENSMUSG00000015536.15	Mocs2	0.123248	5.22077	0.139855	0.713885	0.861166	618	407	526	602	433	359	182	540	287	648	265
ENSMUSG00000015542.18	Nat9	-0.611265	3.9547	3.69738	0.0745428	0.315608	152	195	149	151	143	123	156	268	190	212	163
ENSMUSG00000015568.17	Lpl	0.506671	2.86786	1.83589	0.19635	0.468992	78	22	48	296	125	207	58	68	52	53	77
ENSMUSG00000015575.16	Atp6v0e	-0.31652	5.49943	0.953118	0.345075	0.603945	442	592	500	599	470	464	495	552	626	447	379
ENSMUSG00000015597.18	Zfp318	0.526397	5.12813	5.83983	0.0295028	0.220931	404	220	485	952	726	706	174	441	148	378	483
ENSMUSG00000015599.10	Ttbk1	-0.193912	6.91917	0.229237	0.639293	0.815484	661	464	744	3362	2589	2775	1230	1304	702	672	3643
ENSMUSG00000015605.7	Srf	-0.436999	5.02303	6.52816	0.0225365	0.201665	263	262	305	526	431	513	370	547	286	346	504
ENSMUSG00000015619.11	Gata3	0.698105	0.847286	1.70172	0.212567	0.486279	13	5	9	61	37	59	17	8	5	6	32
ENSMUSG00000015647.10	Lama5	0.699033	3.73022	1.44346	0.249006	0.519273	56	46	69	448	293	611	71	98	25	60	351
ENSMUSG00000015652.10	Steap1	0.117323	0.849602	0.0861995	0.773263	0.893122	23	9	28	38	28	15	6	18	21	21	16
ENSMUSG00000015653.14	Steap2	0.665319	4.52541	6.77026	0.0205552	0.194792	235	138	294	772	537	471	128	196	83	236	357
ENSMUSG00000015656.18	Hspa8	-0.333201	10.8211	1.36292	0.262036	0.531123	22751	18135	19216	26468	25376	13346	20194	27430	17041	22980	20224
ENSMUSG00000015659.13	Serac1	0.903243	3.36483	4.65977	0.0482449	0.264744	94	46	106	453	301	200	37	103	17	75	190
ENSMUSG00000015668.14	Pdzd11	-0.266273	4.80418	0.96743	0.341592	0.601469	321	307	345	345	258	366	242	518	216	445	249
ENSMUSG00000015671.12	Psma2	-0.100098	6.3314	0.09154	0.766563	0.889571	1174	1005	1055	951	681	887	656	1216	748	1209	565
ENSMUSG00000015672.5	Mrpl32	-0.118863	4.2618	0.118229	0.735942	0.873203	241	254	239	289	159	197	176	251	211	263	110
ENSMUSG00000015697.15	Setdb1	0.285252	5.03907	1.02956	0.32704	0.588957	320	181	392	1017	687	567	194	472	100	353	632
ENSMUSG00000015702.14	Anxa9	0.0983729	-0.611818	0.0367738	0.850609	0.93503	3	1	2	14	13	13	4	6	2	4	11
ENSMUSG00000015709.10	Arnt2	-0.11263	7.36143	0.16889	0.687163	0.845746	1681	888	1661	3436	2994	2986	1312	2279	685	1543	4408
ENSMUSG00000015711.9	Prune1	-0.29086	4.85236	2.0397	0.17461	0.444664	290	240	397	432	358	359	312	391	193	295	599
ENSMUSG00000015714.12	Cers2	-0.214932	6.26408	1.40768	0.254685	0.524743	887	719	826	1171	871	1217	783	1168	570	887	1153
ENSMUSG00000015733.14	Capza2	0.530667	6.87611	3.31086	0.0897137	0.338621	1954	812	1925	3073	1657	1873	465	1437	564	1873	976
ENSMUSG00000015745.10	Plekho1	-0.763051	5.55476	5.78438	0.0301657	0.222749	415	521	469	414	340	480	616	706	614	674	466
ENSMUSG00000015747.6	Vps45	-0.319776	4.95834	1.29485	0.273772	0.542751	423	366	345	377	291	269	295	482	299	411	366
ENSMUSG00000015748.14	Prpf3	0.645514	3.68639	5.88313	0.0289968	0.219699	144	74	159	403	270	294	64	171	38	134	163
ENSMUSG00000015749.13	Anp32e	0.455247	5.76903	3.09771	0.099661	0.352131	661	285	701	1590	1068	1130	239	682	223	672	829
ENSMUSG00000015750.16	Aph1a	-0.41337	5.98788	3.28835	0.0907058	0.340421	583	697	733	770	604	844	765	957	553	762	900
ENSMUSG00000015755.17	Tab2	0.515135	5.7699	6.38728	0.0237912	0.206033	561	368	676	1583	1047	1281	367	663	228	588	655
ENSMUSG00000015757.11	Ppil4	1.21774	4.06343	9.90874	0.00693175	0.135382	169	56	174	867	418	449	56	129	46	126	205
ENSMUSG00000015759.12	Cnih1	-0.493977	6.15251	2.39734	0.143276	0.408129	870	809	804	739	601	591	898	1091	730	1038	619
ENSMUSG00000015766.15	Eps8	0.51533	4.64584	3.93749	0.0666548	0.300822	250	116	335	778	537	555	198	241	95	234	377
ENSMUSG00000015776.13	Med22	-0.203606	5.3173	1.05344	0.321682	0.585315	445	386	457	538	448	654	454	579	272	477	558
ENSMUSG00000015790.17	Surf1	-0.366914	6.04492	0.812989	0.3821	0.634517	817	958	842	516	402	547	660	999	748	962	498
ENSMUSG00000015804.15	Med28	-0.711008	6.4734	3.83717	0.0698237	0.305466	1014	979	932	735	666	662	933	1545	1249	1284	729
ENSMUSG00000015806.13	Qdpr	-1.06977	8.02449	7.18445	0.0176148	0.185869	2974	2616	2264	1602	1492	1259	3403	4714	3494	4418	2820
ENSMUSG00000015812.9	Gnrh1	-0.153996	-1.17336	0.0579145	0.813222	0.914573	4	7	1	6	2	1	4	7	1	2	3
ENSMUSG00000015829.14	Tnr	0.874984	6.14481	2.67883	0.123393	0.383189	501	156	506	3170	2462	1861	239	560	142	504	1573
ENSMUSG00000015837.16	Sqstm1	-0.264625	8.92788	0.95423	0.344802	0.603893	5951	5394	6284	5377	4255	6291	5265	7409	3986	6092	6152
ENSMUSG00000015839.7	Nfe2l2	1.09938	4.0862	19.3727	0.000568023	0.037582	155	119	213	624	424	461	94	143	53	140	152
ENSMUSG00000015843.11	Rxrg	-1.04128	4.10046	8.9606	0.00944858	0.15035	196	141	134	151	167	69	183	336	251	263	196
ENSMUSG00000015846.16	Rxra	-0.0974898	5.1854	0.236748	0.633901	0.812515	331	331	413	632	574	595	393	415	254	299	717
ENSMUSG00000015850.12	Adamtsl4	0.0202948	3.43328	0.00184743	0.966308	0.986837	70	35	61	263	207	355	110	111	28	66	318
ENSMUSG00000015852.14	Fcrls	-1.30589	4.03516	6.89725	0.0195971	0.193092	190	133	152	82	103	20	189	380	227	265	217
ENSMUSG00000015854.8	Cd5l	-0.509294	-2.19527	0.224968	0.642407	0.817145	0	1	0	0	0	3	1	0	1	0	2
ENSMUSG00000015869.17	Prpsap1	-0.524032	5.28487	8.23363	0.0121051	0.163232	375	341	338	613	508	436	483	613	323	407	730
ENSMUSG00000015879.9	Fam184b	0.481577	2.90917	2.63519	0.126243	0.386425	82	37	83	240	177	133	30	91	39	59	132
ENSMUSG00000015880.14	Ncapg	1.30803	-1.37534	3.729	0.0734431	0.313497	2	1	2	10	4	8	2	0	2	1	1
ENSMUSG00000015882.19	Lcorl	1.01721	2.92606	5.90798	0.028711	0.21917	35	57	84	449	125	173	38	28	37	71	84
ENSMUSG00000015889.9	Lta4h	-0.0288644	4.77069	0.0263346	0.873345	0.945373	340	263	325	524	373	334	262	402	168	317	372
ENSMUSG00000015890.3	Amdhd1	-0.295146	-1.50212	0.216316	0.64883	0.82098	1	1	3	5	2	3	5	4	0	1	2
ENSMUSG00000015932.9	Dstn	-0.151232	7.22136	0.301981	0.591081	0.786138	2194	1510	1988	1965	1552	1567	1417	2585	991	2248	1402
ENSMUSG00000015937.16	Macroh2a1	-0.155071	5.8933	0.941454	0.347951	0.606099	591	540	646	986	878	939	582	862	403	730	896
ENSMUSG00000015942.10	Gtf2ird2	-0.182332	4.04473	0.785453	0.390068	0.641168	147	129	189	305	250	259	181	226	80	166	346
ENSMUSG00000015943.12	Bola1	-0.640006	3.67641	1.73806	0.20801	0.481975	168	172	151	81	57	62	148	215	164	186	88
ENSMUSG00000015944.10	Castor2	-0.154807	6.85932	0.193548	0.666524	0.831966	710	652	988	3081	2864	1620	1169	1144	756	647	3325
ENSMUSG00000015947.11	Fcgr1	1.92468	3.32674	36.7995	2.59551e-05	0.00736563	104	79	162	365	261	339	20	70	33	58	32
ENSMUSG00000015950.14	Ncf1	1.14331	3.21246	20.4711	0.000446972	0.0322944	101	101	152	236	142	279	39	83	54	61	55
ENSMUSG00000015957.13	Wnt11	0.372159	0.122905	0.576035	0.460138	0.694022	8	11	9	13	15	29	10	5	12	3	10
ENSMUSG00000015961.9	Adss	0.168327	5.6592	0.501294	0.490256	0.716613	825	440	657	1082	682	569	338	759	333	708	456
ENSMUSG00000015966.18	Il17rb	-0.186832	0.632536	0.210129	0.653521	0.823686	22	19	16	15	18	8	13	22	14	17	14
ENSMUSG00000015968.19	Cacna1d	0.507428	5.15864	1.47989	0.243394	0.514756	224	138	334	1285	969	908	162	417	96	267	835
ENSMUSG00000015970.20	Chdh	-0.0981323	2.68808	0.124438	0.72939	0.869351	55	80	83	113	75	73	41	110	31	70	131
ENSMUSG00000015971.6	Actr8	-0.200158	5.59408	0.892411	0.360437	0.616897	536	512	635	677	508	622	451	733	387	624	625
ENSMUSG00000015980.15	Lrrc27	0.00605464	2.13951	0.000677962	0.979585	0.993343	51	38	35	68	80	77	36	62	27	46	66
ENSMUSG00000015981.13	Stk32c	-0.54854	6.55147	4.17451	0.0598209	0.286678	1186	902	972	1076	946	772	968	1710	1009	1259	1071
ENSMUSG00000015994.11	Fnta	-0.488248	6.14952	2.18703	0.160759	0.429231	812	910	801	731	584	514	750	1085	800	1011	732
ENSMUSG00000016018.5	Mtrex	0.265635	5.23621	1.63152	0.221742	0.495089	558	318	447	952	575	517	244	448	264	519	356
ENSMUSG00000016024.10	Lbp	0.52154	2.77778	2.67672	0.12353	0.383189	63	30	58	203	119	232	48	84	37	64	64
ENSMUSG00000016028.12	Celsr1	-0.844291	1.99615	9.41797	0.00812249	0.142878	24	27	22	64	47	55	52	61	23	46	108
ENSMUSG00000016087.14	Fli1	0.221319	1.56433	0.594229	0.453276	0.688506	22	27	44	45	41	65	27	26	21	32	30
ENSMUSG00000016128.15	Stard13	0.459174	3.70923	3.30982	0.0897595	0.338621	155	88	143	346	279	264	77	142	50	103	259
ENSMUSG00000016150.16	Tenm1	0.975526	4.43596	5.55351	0.0331194	0.231413	154	78	229	1089	726	378	124	99	92	161	308
ENSMUSG00000016179.12	Camk1g	-0.0039125	4.2075	0.00038111	0.984693	0.995428	260	143	209	319	241	311	170	240	96	197	339
ENSMUSG00000016181.10	Utp25	0.125028	3.62193	0.204912	0.657543	0.826844	148	78	124	250	226	245	78	174	37	139	266
ENSMUSG00000016194.15	Hsd11b1	0.0540473	4.92128	0.0217823	0.884718	0.951233	433	423	497	330	229	305	249	453	214	467	205
ENSMUSG00000016200.15	Syt14	0.886859	3.95794	9.71529	0.00737539	0.137696	142	88	187	494	425	408	86	168	45	110	203
ENSMUSG00000016206.7	H2-M3	1.58297	2.28238	23.4427	0.000242786	0.0227832	40	38	66	164	96	193	21	23	21	26	27
ENSMUSG00000016239.12	Lonrf3	1.42828	2.1257	18.9584	0.000623118	0.0389962	46	22	53	173	141	97	19	29	11	24	40
ENSMUSG00000016252.8	Atp5e	-1.04353	6.54003	7.18837	0.0175894	0.185785	935	922	910	717	568	448	1393	1832	1194	1468	750
ENSMUSG00000016253.13	Nelfcd	-0.122817	4.6928	0.491127	0.494616	0.719947	298	216	328	435	367	346	230	421	157	289	424
ENSMUSG00000016255.6	Tubb1	-0.0178321	-2.35214	0.000210967	0.99555	0.997796	0	0	1	0	1	1	0	1	1	0	0
ENSMUSG00000016256.11	Ctsz	0.336975	5.52252	2.02001	0.176573	0.446782	399	363	590	894	635	1408	393	577	302	442	446
ENSMUSG00000016257.16	Prelid3b	-0.188893	5.15854	0.411365	0.531374	0.747494	498	374	499	436	354	355	290	642	247	599	321
ENSMUSG00000016262.15	Sertad4	-0.215383	3.84824	1.05382	0.321599	0.585253	179	75	118	296	207	259	141	203	87	174	263
ENSMUSG00000016308.13	Ube2a	-0.501599	4.83471	2.82961	0.114132	0.371612	372	241	317	405	290	225	345	460	323	398	211
ENSMUSG00000016319.4	Slc25a5	-0.328594	7.8765	1.14189	0.302875	0.569256	3262	2509	3128	2443	2038	2155	2529	4154	1846	3391	2377
ENSMUSG00000016344.15	Ppdpf	-0.622075	5.19688	5.22837	0.0378713	0.241358	396	366	384	430	292	361	407	696	354	600	357
ENSMUSG00000016346.18	Kcnq2	-0.283301	8.53927	1.27215	0.277843	0.546729	3036	2107	3213	8247	7116	5868	3560	5004	2520	3195	9273
ENSMUSG00000016349.11	Eef1a2	-0.714607	9.52739	7.83809	0.0139084	0.170535	7240	6632	7001	8554	7968	6796	11293	10780	6950	7560	13616
ENSMUSG00000016356.19	Col20a1	1.15806	1.75905	2.5409	0.132681	0.395191	4	3	13	183	93	138	17	23	8	13	50
ENSMUSG00000016382.16	Pls3	0.453331	6.19288	2.97944	0.105754	0.360726	1272	574	1161	1672	1170	879	384	865	379	1107	643
ENSMUSG00000016386.16	Mpped2	-0.341334	4.05161	3.27763	0.0911832	0.34118	215	120	169	272	227	179	164	246	119	229	271
ENSMUSG00000016409.5	Nkap	0.457035	2.95875	1.71864	0.21043	0.484583	68	31	61	273	187	183	33	68	62	67	116
ENSMUSG00000016427.8	Ndufa1	-0.715998	5.48205	2.20778	0.158921	0.426903	471	622	524	349	228	185	495	619	657	757	290
ENSMUSG00000016458.16	Wt1	1.53959	-1.80937	2.15407	0.163735	0.43226	3	1	0	3	0	8	0	2	1	0	0
ENSMUSG00000016477.19	E2f3	0.112	3.98734	0.252442	0.622971	0.80611	178	87	176	359	281	318	101	250	77	169	278
ENSMUSG00000016481.16	Cr1l	0.260688	3.89682	2.0605	0.172566	0.442962	184	113	165	426	268	207	115	186	90	157	187
ENSMUSG00000016487.16	Ppfibp1	0.776843	4.41696	8.27406	0.0119364	0.162321	220	127	213	698	570	522	98	242	81	170	297
ENSMUSG00000016493.14	Cd46	0.627315	2.48301	3.80367	0.0709215	0.308037	46	41	60	236	95	109	20	38	36	59	78
ENSMUSG00000016494.10	Cd34	-0.156093	5.7915	0.456546	0.509969	0.731491	788	442	738	794	592	767	404	987	394	817	658
ENSMUSG00000016495.13	Plgrkt	0.131071	3.31994	0.363776	0.555816	0.763586	105	66	100	294	168	161	81	130	84	105	97
ENSMUSG00000016496.8	Cd274	6.07147	5.5766	35.1168	3.31912e-05	0.00828588	85	33	297	2977	2030	3324	3	30	4	12	27
ENSMUSG00000016503.19	Gtf3a	-0.523342	4.14936	2.61795	0.127392	0.38823	197	217	212	172	136	136	217	297	181	217	201
ENSMUSG00000016510.12	Mtif3	-0.239917	4.07092	0.949268	0.346021	0.604746	211	193	194	221	195	155	168	272	126	217	210
ENSMUSG00000016520.8	Lnx2	0.209339	2.51536	0.465507	0.50591	0.728627	36	38	57	165	117	114	38	70	20	53	121
ENSMUSG00000016526.9	Dyrk3	0.226496	3.23796	0.612471	0.446563	0.683197	141	77	160	154	92	160	81	143	48	127	67
ENSMUSG00000016528.11	Mapkapk2	-0.139598	5.42714	0.448902	0.513479	0.734423	393	425	552	605	488	799	459	575	362	465	552
ENSMUSG00000016529.6	Il10	3.71202	-1.42163	7.08117	0.0182997	0.188966	0	2	0	2	2	25	0	1	0	0	0
ENSMUSG00000016534.16	Lamp2	0.920421	6.3258	15.7721	0.00132717	0.0619673	903	620	993	2743	1602	2129	450	711	383	848	519
ENSMUSG00000016541.11	Atxn10	-0.219212	7.30639	0.930105	0.350784	0.60849	2038	1550	2033	2058	1788	1851	1715	2653	998	1843	2326
ENSMUSG00000016552.14	Foxred2	0.183154	4.39894	0.383792	0.545277	0.756834	159	149	235	507	347	531	154	204	94	158	538
ENSMUSG00000016554.10	Eif3d	-0.333115	5.97544	2.11769	0.1671	0.435494	691	647	780	787	546	865	679	968	541	765	867
ENSMUSG00000016559.15	H3f3b	0.3437	7.85099	2.10478	0.168314	0.436953	2697	1831	3247	5417	2754	5480	1718	3062	1234	3150	1894
ENSMUSG00000016619.11	Nup50	-0.0181047	5.31358	0.0139699	0.90755	0.961283	424	314	428	868	631	639	337	577	247	477	594
ENSMUSG00000016624.16	Phf21b	0.0269779	3.24579	0.00540436	0.94241	0.975158	68	45	103	250	164	210	61	133	19	111	240
ENSMUSG00000016637.8	Ift27	-0.49586	4.10159	2.08993	0.169725	0.439019	200	219	213	152	125	121	208	267	173	198	225
ENSMUSG00000016664.17	Pacsin2	0.141461	5.59225	0.378284	0.548139	0.75904	426	369	451	1250	1041	829	319	668	220	487	976
ENSMUSG00000016756.18	Cmah	0.16748	-2.09702	0.0339219	0.856447	0.937787	0	1	0	4	0	2	0	1	0	1	2
ENSMUSG00000016757.12	Ttll12	-0.524795	3.99717	7.2548	0.0171653	0.184377	143	135	165	221	187	204	216	247	131	164	273
ENSMUSG00000016758.5	Bik	0.253544	-1.35351	0.144719	0.709198	0.858737	1	3	5	2	2	7	1	5	0	4	2
ENSMUSG00000016763.16	Scube1	-0.685215	3.85231	2.87987	0.111235	0.36824	88	45	82	257	331	204	141	172	67	134	572
ENSMUSG00000016831.13	Tox4	0.240544	6.14211	1.87782	0.191608	0.464028	747	520	802	1921	1115	1434	524	1003	399	687	1003
ENSMUSG00000016833.15	Mrps18c	-0.62953	4.52095	1.26889	0.278434	0.547259	266	338	260	170	102	117	212	290	444	298	86
ENSMUSG00000016918.16	Sulf1	0.448455	4.29172	2.53197	0.133311	0.396247	176	102	158	607	458	509	156	218	75	198	273
ENSMUSG00000016921.15	Srsf6	0.197704	6.67776	0.819555	0.380237	0.63328	1005	609	1073	3332	2092	1574	922	1320	598	897	1535
ENSMUSG00000016933.18	Plcg1	-0.067954	5.87203	0.0600002	0.809959	0.912914	504	298	511	1485	1277	1009	470	816	272	521	1458
ENSMUSG00000016940.19	Kctd2	-0.561827	6.46854	2.74369	0.119302	0.378099	958	1081	1105	775	686	630	934	1463	1005	1252	978
ENSMUSG00000016942.7	Tmprss6	0.57082	0.340115	1.80698	0.199706	0.47297	20	18	17	15	12	16	6	14	11	8	7
ENSMUSG00000016946.7	Kctd5	-0.134288	4.7661	0.390404	0.541881	0.754386	338	269	368	369	275	389	236	400	178	343	434
ENSMUSG00000016984.8	Etaa1	0.181423	2.82898	0.369767	0.552621	0.761729	115	56	101	151	99	68	65	61	56	100	54
ENSMUSG00000016995.18	Matn4	-0.19535	2.97514	0.513392	0.485156	0.712296	63	50	68	173	154	118	98	74	50	62	175
ENSMUSG00000017002.15	Slpi	2.06037	-1.05677	4.28732	0.0568614	0.28088	0	3	11	0	6	19	1	2	1	0	2
ENSMUSG00000017007.10	Rbpjl	0.0317219	-0.322199	0.00456225	0.947079	0.977584	2	6	6	18	16	8	8	10	1	6	11
ENSMUSG00000017009.4	Sdc4	0.924393	6.25182	12.8571	0.0028723	0.0950531	660	735	907	2009	1335	2745	474	685	288	481	968
ENSMUSG00000017057.10	Il13ra1	1.29885	3.0934	15.3728	0.00146792	0.0662364	95	57	120	233	142	353	36	65	46	61	36
ENSMUSG00000017119.21	Nbr1	0.465574	6.81441	3.41522	0.0852802	0.332157	1360	710	1407	3056	2420	2166	600	1477	357	1278	1801
ENSMUSG00000017132.18	Cyth1	0.199676	6.33912	1.356	0.263198	0.532363	766	647	929	2086	1368	1569	658	971	512	752	1264
ENSMUSG00000017144.9	Rnd3	0.744418	3.61072	8.43236	0.0113018	0.160548	121	85	140	416	271	280	62	152	43	139	105
ENSMUSG00000017146.13	Brca1	0.101253	0.977282	0.103807	0.751947	0.881561	21	20	14	33	29	36	16	23	18	20	14
ENSMUSG00000017165.2	Gast	-1.09275	-2.20245	1.22935	0.285744	0.554309	0	0	1	0	2	0	0	2	1	0	2
ENSMUSG00000017167.7	Cntnap1	-0.32335	7.26594	0.907699	0.356476	0.613057	1128	773	1156	3610	3115	2531	1538	1739	758	1107	5101
ENSMUSG00000017176.18	Nt5c3b	-0.831689	5.20606	7.20599	0.0174758	0.185249	406	377	317	375	290	253	418	633	512	500	431
ENSMUSG00000017188.4	Coa3	-0.728363	6.13826	3.28017	0.0910697	0.340972	828	860	789	485	431	394	820	1343	806	1090	644
ENSMUSG00000017195.16	Zpbp2	0.822134	-2.22016	0.815574	0.381365	0.633967	0	0	1	1	2	2	0	0	0	1	1
ENSMUSG00000017204.5	Gsdma	0.695153	-1.81466	1.05867	0.368895	0.623758	2	1	4	1	2	2	0	1	1	1	2
ENSMUSG00000017210.15	Med24	-0.0167574	6.29072	0.00680683	0.935384	0.971945	794	526	986	1775	1373	1126	690	1184	364	787	1531
ENSMUSG00000017221.15	Psmd3	-0.222707	6.69013	1.52445	0.236753	0.50883	1046	903	1247	1563	1206	1732	1073	1598	730	1200	1575
ENSMUSG00000017264.17	Exosc10	0.120268	4.93407	0.385598	0.544346	0.756309	313	211	385	689	490	591	242	398	143	326	563
ENSMUSG00000017286.16	Glod4	-0.221192	5.33273	0.521401	0.481829	0.709757	554	471	522	410	383	418	265	828	311	580	447
ENSMUSG00000017288.16	Vps53	-0.142269	5.49355	0.622968	0.442774	0.679942	544	397	579	705	584	595	444	634	289	547	718
ENSMUSG00000017291.14	Taok1	0.680572	6.15583	8.07039	0.0128145	0.167374	767	399	833	2516	1792	1410	439	590	429	666	777
ENSMUSG00000017299.14	Dnttip1	-0.106353	3.86493	0.310983	0.585659	0.782941	154	143	195	247	175	194	127	232	109	161	197
ENSMUSG00000017300.10	Tnnc2	-0.713601	-1.85345	0.697099	0.417424	0.661672	1	3	1	1	0	1	3	2	2	1	0
ENSMUSG00000017307.17	Acot8	-0.646999	3.50544	10.003	0.00672669	0.133592	93	91	86	201	123	144	165	185	106	134	152
ENSMUSG00000017309.12	Cd300lg	0.447965	-0.657356	0.720819	0.409795	0.655995	4	2	1	19	10	13	6	4	2	4	5
ENSMUSG00000017314.13	Mpp2	-0.313938	6.57592	1.58274	0.228423	0.501611	812	691	902	1997	1753	1118	1129	1339	498	770	2407
ENSMUSG00000017344.5	Vtn	-0.643012	6.18804	9.8257	0.00711832	0.135983	657	619	832	962	791	687	865	1203	757	886	1138
ENSMUSG00000017376.16	Nlk	0.171553	5.66448	0.683406	0.42193	0.664726	661	309	593	1351	1017	631	388	752	288	626	587
ENSMUSG00000017386.11	Traf4	-0.483598	3.75431	2.93325	0.108255	0.364262	123	166	157	159	125	118	154	172	143	177	184
ENSMUSG00000017390.16	Aldoc	-0.219788	10.4281	0.618021	0.444553	0.681348	15068	16514	18851	17247	13944	14944	15522	20593	10791	16328	17244
ENSMUSG00000017400.11	Stac2	-0.478435	6.14891	7.29037	0.0169431	0.183818	659	519	603	1136	986	1068	822	1107	522	742	1489
ENSMUSG00000017404.13	Rpl19	-0.724569	8.98842	1.98251	0.180389	0.451891	5387	7427	5521	2786	2336	3019	5504	7828	8432	6928	2988
ENSMUSG00000017405.15	Nek8	-0.456415	1.9205	3.0115	0.104059	0.358842	33	40	25	68	48	38	45	67	27	37	60
ENSMUSG00000017412.16	Cacnb4	0.796511	6.51305	8.36773	0.0115561	0.161333	1006	536	1264	3809	2143	1453	469	630	392	983	1186
ENSMUSG00000017417.15	Plxdc1	-0.38453	4.96711	3.87648	0.068561	0.30355	291	275	396	402	390	402	343	491	221	346	592
ENSMUSG00000017418.15	Arl5b	1.13374	4.09562	7.67113	0.0147614	0.173453	152	49	151	981	442	423	62	150	64	124	186
ENSMUSG00000017421.19	Zfp207	0.630877	6.38662	8.40977	0.0113899	0.160734	972	751	1075	2841	1797	1157	475	926	508	916	658
ENSMUSG00000017428.17	Psmd11	0.203307	5.38381	1.0071	0.332198	0.593626	466	264	467	1027	759	830	305	559	193	418	746
ENSMUSG00000017446.15	C1qtnf1	0.607008	1.86185	2.25216	0.155075	0.422514	32	19	29	86	45	155	16	41	13	27	61
ENSMUSG00000017453.5	Pipox	-0.233713	1.17862	0.424257	0.5251	0.742746	29	26	25	22	20	25	15	50	14	28	23
ENSMUSG00000017466.10	Timp2	-0.288401	7.54922	0.875464	0.364904	0.619995	1653	1111	1807	3546	3272	3143	2150	2237	786	1346	5736
ENSMUSG00000017478.16	Zc3h18	0.167176	4.92996	0.284682	0.601804	0.792735	210	163	300	830	611	759	263	374	93	287	662
ENSMUSG00000017485.12	Top2b	0.560834	5.49069	5.70003	0.0312078	0.226298	473	339	588	1686	821	735	320	298	302	487	478
ENSMUSG00000017491.10	Rarb	-0.458759	3.52468	1.83659	0.196269	0.468992	168	89	93	145	148	119	61	327	96	175	95
ENSMUSG00000017493.13	Igfbp4	-0.235028	5.93252	1.49412	0.241248	0.513139	736	412	717	947	734	1043	672	952	508	695	740
ENSMUSG00000017499.16	Cdc6	1.76655	0.0328908	5.95951	0.0281288	0.218123	3	2	5	70	25	19	2	8	0	3	8
ENSMUSG00000017548.16	Suz12	0.570304	4.66328	6.70297	0.0210849	0.195709	240	191	351	892	502	427	201	203	166	244	237
ENSMUSG00000017550.15	Atad5	1.12163	1.82053	6.04383	0.0272055	0.217073	29	7	48	180	62	97	12	20	12	28	44
ENSMUSG00000017561.17	Crlf3	0.20507	3.50896	1.2035	0.290664	0.558596	113	97	136	269	211	180	103	141	53	114	173
ENSMUSG00000017607.10	Tns4	-0.519875	-1.32947	0.903769	0.396346	0.645924	2	0	2	9	2	3	3	4	2	3	4
ENSMUSG00000017615.13	Tnfaip1	-0.178502	5.56901	1.13728	0.303816	0.569963	427	383	533	906	660	802	426	716	298	525	901
ENSMUSG00000017631.20	Abr	-0.138183	8.23725	0.325547	0.577105	0.777909	2781	1919	3007	6071	5308	5589	2798	3822	1637	2688	7439
ENSMUSG00000017639.14	Rab11fip4	-0.493052	8.04961	4.49386	0.0518783	0.271301	2211	1799	2304	4613	4446	3405	2998	3251	2165	2348	6825
ENSMUSG00000017652.17	Cd40	2.79595	1.4498	25.828	0.000154124	0.0181855	18	8	57	97	74	122	5	8	3	13	3
ENSMUSG00000017664.17	Slc35c2	-0.631962	6.07403	3.86925	0.0687912	0.303925	696	785	756	596	500	594	790	1013	845	881	767
ENSMUSG00000017667.10	Zfp334	0.431543	4.61104	2.56923	0.130705	0.392883	197	162	251	701	539	598	129	301	97	224	452
ENSMUSG00000017670.17	Elmo2	-0.20485	6.91542	0.814342	0.381715	0.634076	1170	715	1380	2245	1999	2011	1165	1744	558	1277	2834
ENSMUSG00000017677.12	Wsb1	0.607611	5.48142	5.12996	0.0394638	0.245582	502	227	456	1974	908	810	297	497	190	404	575
ENSMUSG00000017679.17	Ttpal	-0.220017	6.16254	1.08542	0.314698	0.579373	965	668	824	1151	923	682	615	1188	544	945	991
ENSMUSG00000017686.18	Rhot1	0.229775	5.69193	1.11253	0.308943	0.574449	702	400	721	1131	811	782	326	769	259	789	509
ENSMUSG00000017692.9	Rhbdl3	-0.0493186	4.23178	0.0629594	0.80543	0.910322	177	156	173	368	354	312	139	245	156	167	345
ENSMUSG00000017697.4	Ada	1.61283	0.433369	14.4485	0.00186448	0.0748691	19	16	20	34	12	38	5	5	8	6	4
ENSMUSG00000017707.10	Serinc3	0.55665	7.46003	5.8348	0.0295621	0.22119	2573	1427	2833	3900	2771	3394	822	2536	879	2093	1586
ENSMUSG00000017713.10	Tha1	-0.0450392	2.30673	0.035919	0.852334	0.936085	49	51	49	82	63	88	30	65	39	52	86
ENSMUSG00000017715.12	Pgs1	-0.410867	6.20855	3.61459	0.0775171	0.320222	800	731	747	930	835	955	787	1065	788	871	992
ENSMUSG00000017716.16	Birc5	0.279074	0.0303347	0.465715	0.505816	0.728551	4	6	8	22	19	23	3	11	8	9	11
ENSMUSG00000017718.16	Afmid	0.273609	0.774473	0.503528	0.489308	0.716003	21	20	11	15	20	46	11	16	8	19	24
ENSMUSG00000017721.16	Pigt	-0.356032	6.10126	2.65509	0.124934	0.384869	591	659	683	1053	801	1111	953	880	494	608	1315
ENSMUSG00000017723.12	Wfdc2	-0.698558	0.10709	3.1709	0.0961024	0.347764	7	12	10	13	6	8	10	22	10	11	11
ENSMUSG00000017724.15	Etv4	-1.22646	3.21938	25.6633	0.000158892	0.018381	79	61	47	103	76	92	143	142	123	143	143
ENSMUSG00000017734.16	Dbndd2	0.338552	7.81712	2.11268	0.16757	0.436222	2789	2796	3215	4015	2645	4105	1459	2833	1683	2579	2040
ENSMUSG00000017737.3	Mmp9	0.0626683	0.771137	0.0324272	0.859608	0.939414	13	17	21	23	18	35	11	15	8	15	38
ENSMUSG00000017740.18	Slc12a5	-0.160546	8.32115	0.189064	0.670155	0.83447	2147	1509	2394	8433	7024	6094	3092	3197	1668	1992	9992
ENSMUSG00000017747.14	Ghdc	-0.139886	2.62222	0.377428	0.548586	0.759367	78	49	72	100	77	85	65	95	31	60	107
ENSMUSG00000017754.14	Pltp	-1.31338	5.66788	27.0986	0.000122378	0.0161123	430	301	425	447	404	336	1006	876	432	640	1137
ENSMUSG00000017756.10	Slc12a7	0.912297	2.69681	2.97659	0.105906	0.360726	26	19	55	229	182	251	52	39	15	25	115
ENSMUSG00000017760.17	Ctsa	-0.248773	6.34073	1.70377	0.212307	0.486052	889	759	987	1135	896	1204	824	1280	566	940	1311
ENSMUSG00000017764.3	Zswim1	-0.354876	4.26283	2.84916	0.112995	0.36996	195	129	215	299	236	313	250	266	105	201	393
ENSMUSG00000017765.18	Slc12a4	-0.32573	4.70313	1.95308	0.183456	0.455192	203	187	214	434	317	613	322	331	189	254	505
ENSMUSG00000017774.20	Myo1c	0.404185	4.46315	2.30219	0.150878	0.417097	169	147	231	613	341	690	179	222	109	181	356
ENSMUSG00000017776.16	Crk	0.292449	6.71194	1.54225	0.234168	0.506998	1626	826	1505	2360	1785	1207	658	1413	629	1496	945
ENSMUSG00000017778.15	Cox7c	-0.638413	7.38361	1.65391	0.218762	0.492177	1834	2505	1943	1115	865	775	1777	2442	2365	2758	1021
ENSMUSG00000017781.18	Pitpna	-0.165266	8.11062	0.654334	0.431756	0.672368	3407	2827	3155	4010	3283	3773	2617	4026	2080	3208	4224
ENSMUSG00000017801.16	Mlx	-0.245761	4.70072	0.994426	0.335158	0.596066	337	236	359	369	254	289	200	451	198	412	299
ENSMUSG00000017802.15	Retreg3	-0.250295	6.42786	1.62632	0.222443	0.49553	881	904	1056	1341	1063	957	878	1289	683	961	1344
ENSMUSG00000017817.12	Jph2	-0.832123	0.924787	4.37028	0.0547948	0.276188	13	15	17	20	24	14	29	38	25	10	17
ENSMUSG00000017830.16	Dhx58	3.26811	3.59724	33.2052	4.43609e-05	0.0095388	65	44	136	506	283	876	13	36	12	30	26
ENSMUSG00000017831.9	Rab5a	0.417674	5.98772	4.66105	0.0482181	0.264739	890	479	875	1643	1031	1077	429	672	354	848	630
ENSMUSG00000017832.3	Hspb9	0.628693	-1.93933	0.4279	0.523351	0.741297	1	2	0	2	0	5	0	1	2	0	1
ENSMUSG00000017837.13	Nkiras2	-0.186926	3.98619	0.810707	0.382751	0.635099	167	173	161	230	196	237	169	207	138	186	194
ENSMUSG00000017843.15	Ppp2r5c	-0.159003	7.30318	0.500475	0.490605	0.716762	2027	1637	1893	2558	1813	1754	1510	2516	1288	2017	1692
ENSMUSG00000017858.13	Ift52	-0.0566464	4.34113	0.098173	0.758534	0.885226	271	183	227	359	276	267	171	322	129	241	286
ENSMUSG00000017861.12	Mybl2	0.671746	0.382201	1.67425	0.216098	0.490303	4	7	4	44	34	34	5	11	5	7	21
ENSMUSG00000017868.17	Sgk2	-0.511724	1.39124	1.9518	0.183591	0.455334	33	28	23	23	14	35	18	45	27	36	35
ENSMUSG00000017897.19	Eya2	-0.393801	1.91598	1.59371	0.226897	0.500523	30	36	38	55	41	55	40	39	46	23	71
ENSMUSG00000017929.14	B4galt5	0.345971	5.46511	1.2448	0.282856	0.551335	308	264	406	1301	1167	959	375	399	179	340	921
ENSMUSG00000017943.16	Gdap1l1	-0.413632	6.38832	2.02164	0.176409	0.446782	981	998	1021	814	695	831	1017	1289	765	1017	1066
ENSMUSG00000017969.14	Ptgis	-0.408154	1.53168	1.58335	0.228337	0.501469	24	29	39	26	24	41	24	46	30	26	46
ENSMUSG00000017978.19	Cadps2	0.094213	6.0059	0.241039	0.630869	0.810536	802	421	809	1385	1203	907	458	890	335	798	1056
ENSMUSG00000017999.17	Ddx27	0.493638	3.80761	2.48441	0.136731	0.400155	169	65	157	429	287	310	69	173	38	134	267
ENSMUSG00000018001.19	Cyth3	0.188878	5.03024	0.921927	0.352846	0.610372	374	272	458	696	464	579	240	450	134	378	549
ENSMUSG00000018008.9	Cyth4	0.0181667	3.59502	0.00545587	0.942137	0.974961	119	77	133	202	152	329	81	190	99	119	164
ENSMUSG00000018012.12	Rac3	-0.817342	4.13029	5.0826	0.040258	0.247387	195	197	175	142	123	95	236	292	216	237	195
ENSMUSG00000018040.10	Rrp7a	-0.79065	6.87789	6.39454	0.0237246	0.205899	1100	1250	1107	1208	935	999	1647	1683	1685	1281	1386
ENSMUSG00000018042.19	Cyb5r3	0.0549419	4.85425	0.0498179	0.826522	0.922824	262	204	326	577	441	679	238	358	113	303	640
ENSMUSG00000018068.14	Ints2	1.27611	3.56278	11.1786	0.00467645	0.115701	127	41	126	653	294	277	38	92	33	95	121
ENSMUSG00000018076.13	Med13l	0.830077	5.85957	2.70664	0.121619	0.380679	363	185	434	2578	1738	1699	263	507	109	314	1333
ENSMUSG00000018102.6	H2bc4	-0.508713	5.17065	5.88583	0.0289656	0.219658	371	308	327	523	385	494	393	686	279	596	382
ENSMUSG00000018126.16	Baiap2l2	-0.899195	0.311851	4.98463	0.0419611	0.251873	10	5	12	17	15	5	11	19	4	17	35
ENSMUSG00000018143.11	Mafk	1.2028	4.17881	12.7739	0.00294022	0.0960525	121	121	179	674	385	745	103	134	68	94	184
ENSMUSG00000018160.16	Med1	0.698648	5.09403	3.01533	0.103858	0.358429	237	124	308	1478	989	792	152	335	104	280	650
ENSMUSG00000018166.9	Erbb3	-0.289553	3.66628	1.08424	0.314952	0.579449	100	84	78	340	238	170	126	181	64	118	321
ENSMUSG00000018167.11	Stard3	-0.492378	5.16796	4.01611	0.0642901	0.295346	370	367	392	476	385	340	458	558	380	421	401
ENSMUSG00000018168.9	Ikzf3	1.15227	-0.149181	1.93847	0.185004	0.456674	2	3	3	3	14	61	3	12	3	4	2
ENSMUSG00000018169.13	Mfng	-0.646094	2.07658	3.62377	0.0771804	0.319818	38	50	35	32	35	53	55	60	46	58	45
ENSMUSG00000018171.10	Vmp1	-0.176736	6.83618	0.299236	0.592755	0.786793	1656	1352	1400	1596	993	1075	932	1757	1139	1727	834
ENSMUSG00000018189.13	Uchl5	-0.21599	4.60675	0.47446	0.501912	0.725653	325	244	348	339	251	210	212	358	290	299	183
ENSMUSG00000018196.19	Glrx2	-0.0437161	5.43683	0.0560553	0.816184	0.916294	514	306	459	986	774	544	321	734	255	529	660
ENSMUSG00000018199.10	Ro60	0.440582	4.99951	1.81984	0.198205	0.470981	237	211	385	1235	722	492	283	157	291	298	308
ENSMUSG00000018209.16	Stk4	0.386859	4.83221	2.67994	0.123322	0.383159	341	162	325	806	650	488	175	374	110	300	455
ENSMUSG00000018217.13	Pmp22	-0.554788	4.81092	5.895	0.02886	0.219381	333	235	254	295	241	435	328	483	205	393	464
ENSMUSG00000018238.7	Gdf9	1.10966	1.02031	4.42907	0.0533839	0.273765	9	8	12	142	37	37	12	17	10	9	12
ENSMUSG00000018239.10	Zcchc10	0.397895	2.25403	1.85068	0.19466	0.467364	85	42	69	87	62	64	30	63	28	61	32
ENSMUSG00000018286.7	Psmb6	-0.474148	6.82883	1.34772	0.264598	0.533774	1330	1543	1475	840	691	896	1124	1852	1392	1640	884
ENSMUSG00000018287.13	Spag7	-0.207991	4.217	1.00063	0.333703	0.59507	210	160	211	283	215	303	133	361	108	255	286
ENSMUSG00000018293.5	Pfn1	-0.537631	6.46296	5.49624	0.0339034	0.233976	804	807	890	1079	833	1345	1272	1494	777	1015	1081
ENSMUSG00000018322.11	Tomm34	-0.14597	5.42812	0.376814	0.548907	0.759633	445	236	430	837	764	787	417	710	167	466	891
ENSMUSG00000018326.10	Ywhab	-0.231507	8.72652	1.42894	0.25129	0.521403	5196	3373	4661	7399	5856	5257	4904	6132	3051	4848	6197
ENSMUSG00000018334.19	Ksr1	0.216468	5.27477	0.547293	0.471338	0.70283	330	233	413	1045	881	735	285	469	150	268	936
ENSMUSG00000018339.13	Gpx3	0.0321128	4.5662	0.00908783	0.925369	0.968511	203	347	212	259	206	613	293	267	172	180	328
ENSMUSG00000018340.14	Anxa6	-0.308543	6.2638	2.82773	0.114243	0.371822	838	571	786	1243	1034	1187	909	1067	490	806	1517
ENSMUSG00000018341.13	Il12rb2	1.86919	-1.65668	3.31811	0.089397	0.337987	0	0	0	7	6	8	0	0	1	1	1
ENSMUSG00000018347.17	Zkscan6	-0.00405649	3.68663	0.000412368	0.984078	0.995254	145	128	154	237	187	171	91	183	75	196	170
ENSMUSG00000018362.15	Kpna2	0.166567	3.82728	0.256489	0.620223	0.804003	214	148	226	219	149	180	80	241	67	254	100
ENSMUSG00000018363.17	Smurf2	0.121796	4.80703	0.601648	0.450526	0.68601	314	222	342	612	485	437	240	385	162	317	375
ENSMUSG00000018372.14	Cep95	0.841956	2.63487	6.11644	0.0264385	0.214268	47	26	78	252	169	127	26	59	25	48	84
ENSMUSG00000018377.11	Vezf1	0.519779	4.88307	2.93985	0.107893	0.363856	248	148	290	937	648	828	196	280	114	240	549
ENSMUSG00000018378.14	Cuedc1	-0.183785	5.03358	0.769123	0.394912	0.644692	244	235	350	592	442	739	333	478	204	325	626
ENSMUSG00000018379.18	Srsf1	0.586472	6.94792	5.47752	0.0341644	0.234345	1256	694	1372	4990	2745	2230	832	1334	550	1263	1459
ENSMUSG00000018381.16	Abi3	0.153379	3.03605	0.517415	0.48348	0.710854	87	72	89	146	134	168	79	115	61	70	81
ENSMUSG00000018387.13	Shroom1	-0.0929213	3.0351	0.167288	0.688563	0.845971	83	96	90	149	90	112	75	119	49	76	152
ENSMUSG00000018395.20	Kif3a	0.402352	5.61194	2.5723	0.130493	0.392647	474	258	487	1645	1250	844	318	541	294	424	746
ENSMUSG00000018398.19	Septin8	-0.113206	7.60509	0.283639	0.602464	0.793104	2136	1215	2026	4435	3717	2463	1748	2823	993	2267	3839
ENSMUSG00000018401.18	Mtmr4	0.292454	6.18016	1.23651	0.284401	0.552795	639	440	801	1896	1640	1536	510	825	298	607	1546
ENSMUSG00000018405.8	Mrm1	-0.570203	3.72708	5.3291	0.0363187	0.237697	155	129	139	155	132	106	134	212	106	203	226
ENSMUSG00000018411.18	Mapt	-0.400307	8.52906	2.11918	0.16696	0.435494	2712	2090	2848	8344	6973	5430	4097	4330	2821	2942	9765
ENSMUSG00000018412.17	Kansl1	0.503495	5.7788	2.16633	0.16262	0.431285	468	261	540	1918	1310	1313	358	603	141	452	1120
ENSMUSG00000018415.15	Gid4	0.0548199	5.57489	0.0694683	0.795854	0.905341	547	377	554	1127	829	616	287	790	227	645	758
ENSMUSG00000018417.15	Myo1b	0.260013	4.19138	1.30365	0.272215	0.541305	241	108	259	473	331	248	111	290	121	212	170
ENSMUSG00000018425.19	Dhx40	0.230545	4.02669	1.21945	0.287614	0.555876	245	109	177	393	257	274	136	194	85	226	171
ENSMUSG00000018427.9	Ypel2	-0.00873875	5.16207	0.00099592	0.975258	0.991284	392	164	310	958	857	469	269	560	161	370	740
ENSMUSG00000018428.16	Akap1	-0.323992	5.06116	2.88945	0.110693	0.367426	333	212	369	665	514	408	326	538	213	329	727
ENSMUSG00000018433.15	Nol11	0.395463	4.10183	3.17477	0.0959186	0.347496	249	112	265	377	284	295	92	237	74	197	239
ENSMUSG00000018442.14	Derl2	-0.0409933	4.53345	0.0662858	0.800473	0.907387	231	199	264	513	330	355	185	340	180	266	310
ENSMUSG00000018446.9	C1qbp	-0.154128	5.53335	0.274436	0.608356	0.79753	597	584	651	528	377	504	504	764	346	531	497
ENSMUSG00000018449.13	Rpain	0.2395	3.01806	1.08548	0.314686	0.579373	120	76	107	182	112	92	48	119	45	97	99
ENSMUSG00000018451.8	6330403K07Rik	-0.562425	7.91215	1.96804	0.181889	0.453644	3147	3151	2796	1571	1761	1307	2644	4328	2379	3535	2725
ENSMUSG00000018459.16	Slc13a3	-0.377152	4.27097	1.91895	0.187098	0.459085	115	129	139	377	275	436	253	216	150	164	416
ENSMUSG00000018470.9	Kcnab3	0.190353	5.43455	0.675827	0.424457	0.666733	577	365	490	933	695	712	293	620	154	422	891
ENSMUSG00000018474.19	Chd3	-0.529184	8.62147	4.26844	0.0573443	0.281784	2976	3147	3045	7377	6909	4034	4805	5201	3742	3049	9050
ENSMUSG00000018476.8	Kdm6b	1.48212	4.96399	2.90208	0.109983	0.366135	65	27	100	2125	762	1528	86	110	31	71	710
ENSMUSG00000018479.13	1700125H20Rik	0.385649	-2.3073	0.137145	0.740643	0.875276	0	0	2	0	1	1	0	1	0	0	1
ENSMUSG00000018481.10	Appbp2	0.561393	5.88171	4.61805	0.0491297	0.266121	580	303	706	1832	1339	1412	381	578	224	553	960
ENSMUSG00000018486.3	Wnt9b	-0.4957	1.55744	1.39322	0.25703	0.527086	30	35	38	26	18	27	48	26	33	22	40
ENSMUSG00000018500.3	Adora2b	-0.601182	2.36948	2.25825	0.154556	0.421859	60	56	63	35	32	50	77	74	59	62	42
ENSMUSG00000018501.18	Ncor1	0.427864	6.70717	2.63829	0.126039	0.386114	1081	510	1226	3083	2524	2097	590	1369	419	1069	1688
ENSMUSG00000018507.17	Trpv2	-0.5052	4.21153	4.41715	0.0536664	0.274039	202	169	212	193	161	249	220	276	182	210	283
ENSMUSG00000018509.9	Cenpv	-0.750956	4.1987	7.23617	0.0172831	0.184705	181	187	155	223	173	145	211	327	229	265	185
ENSMUSG00000018537.17	Pcgf2	0.253872	3.64659	0.67293	0.425429	0.667244	84	71	121	320	236	362	92	141	53	100	267
ENSMUSG00000018541.11	Cwc25	0.0820658	3.807	0.141934	0.71187	0.860048	117	83	165	354	226	295	103	198	73	146	250
ENSMUSG00000018547.9	Pip4k2b	-0.367677	6.58642	2.14193	0.164848	0.433255	843	564	907	1920	1613	1412	1097	1271	520	803	2640
ENSMUSG00000018548.16	Trim37	-0.0333459	7.73237	0.0255542	0.875219	0.946289	2809	1488	2387	4322	3931	2462	1671	3468	1147	2750	3242
ENSMUSG00000018554.14	Ybx2	0.171671	0.900958	0.247453	0.626398	0.808513	11	12	15	55	39	28	8	26	10	15	33
ENSMUSG00000018559.17	Ctdnep1	-0.594036	5.83079	8.91645	0.00958932	0.15065	528	504	565	759	593	694	753	922	556	677	793
ENSMUSG00000018565.18	Elp5	-0.718436	6.12984	2.95658	0.106982	0.362361	734	876	829	517	458	387	720	1122	1031	1048	568
ENSMUSG00000018566.15	Slc2a4	0.468049	2.16203	1.03916	0.324872	0.587751	40	84	103	33	30	59	31	44	36	33	45
ENSMUSG00000018567.15	Gabarap	-0.684362	7.92018	2.33842	0.147926	0.413316	2520	3373	2520	1740	1325	1759	2747	3561	3838	3177	1683
ENSMUSG00000018569.13	Cldn7	-0.263267	-2.25855	0.0587363	0.811929	0.913939	0	0	0	2	0	2	1	0	1	1	0
ENSMUSG00000018570.18	2810408A11Rik	-0.0590567	-1.26358	0.00880571	0.926533	0.968898	6	3	3	5	2	1	1	4	4	4	1
ENSMUSG00000018572.11	Phf23	-0.749902	5.7675	5.35019	0.0360031	0.237311	526	634	512	528	459	394	685	814	760	675	608
ENSMUSG00000018574.15	Acadvl	-0.375366	5.1651	3.37655	0.0868917	0.334644	412	335	425	475	382	416	356	587	294	493	503
ENSMUSG00000018581.16	Dnah11	1.2359	2.0596	4.05588	0.063132	0.292849	16	11	25	224	178	79	12	22	9	17	78
ENSMUSG00000018583.6	G3bp1	0.0503171	5.61428	0.0744187	0.788889	0.901655	492	323	522	1133	909	882	432	630	256	542	858
ENSMUSG00000018585.10	Atox1	-0.429359	4.40878	2.9101	0.109535	0.365893	245	210	263	249	220	199	221	374	156	342	253
ENSMUSG00000018589.9	Glra2	0.125108	2.4715	0.223253	0.643668	0.818007	75	27	54	133	110	82	32	57	37	73	87
ENSMUSG00000018593.14	Sparc	0.486507	8.81007	2.20668	0.159018	0.426984	3446	3749	5159	11535	9013	11987	3676	4041	1231	3056	9802
ENSMUSG00000018595.7	Glra4	0.29009	-1.18342	0.354178	0.609462	0.798402	2	4	4	6	6	3	3	5	1	1	4
ENSMUSG00000018599.6	Mief2	-0.621317	4.54877	4.44322	0.0530506	0.273678	221	274	238	244	181	238	309	331	280	276	285
ENSMUSG00000018604.19	Tbx3	0.443836	1.25415	1.46036	0.246382	0.517637	21	15	15	69	45	60	22	20	8	13	42
ENSMUSG00000018634.11	Crhr1	-0.385329	4.84058	3.47269	0.0829506	0.328373	269	261	327	479	403	265	323	368	210	314	601
ENSMUSG00000018648.16	Dusp14	-0.501283	5.10198	3.92131	0.0671542	0.301095	455	289	382	397	383	297	358	712	233	533	436
ENSMUSG00000018651.15	Tada2a	0.078508	3.92448	0.132321	0.721333	0.865164	176	112	237	316	221	201	103	232	71	211	220
ENSMUSG00000018654.18	Ikzf1	1.11478	2.14875	11.2983	0.00451131	0.114267	45	26	49	107	97	172	17	42	13	35	42
ENSMUSG00000018656.6	Tcaf3	1.50358	-2.28118	2.36865	0.145518	0.410679	0	0	1	3	1	1	0	1	0	0	0
ENSMUSG00000018659.13	Pnpo	-0.271618	5.79292	0.653461	0.432056	0.672452	737	711	807	506	369	492	558	851	467	678	752
ENSMUSG00000018661.18	Cog1	-0.199761	5.28902	1.03332	0.326187	0.588692	385	272	467	728	617	564	376	610	186	441	812
ENSMUSG00000018666.14	Cbx1	0.35956	4.36843	1.5461	0.233614	0.506781	232	96	239	702	465	308	101	272	81	286	293
ENSMUSG00000018669.15	Cdk5rap3	-0.361012	4.92426	1.15601	0.300014	0.567092	306	441	382	294	197	310	318	433	318	355	387
ENSMUSG00000018672.16	Copz2	-0.969337	2.0078	6.23689	0.025221	0.211538	38	45	33	38	23	22	78	78	31	44	52
ENSMUSG00000018677.10	Slc25a39	-0.954855	6.27122	8.447	0.011245	0.16004	695	786	710	581	561	632	1218	1183	1068	912	925
ENSMUSG00000018678.14	Sp2	0.261468	3.5921	0.396049	0.539012	0.751991	82	45	93	348	233	389	122	106	38	74	286
ENSMUSG00000018697.15	Aatf	0.0451359	3.32623	0.0514373	0.823775	0.921335	117	89	123	167	123	191	80	150	55	121	141
ENSMUSG00000018698.16	Lhx1	0.742576	3.24152	3.61807	0.077389	0.320186	69	56	174	309	206	189	52	62	16	78	202
ENSMUSG00000018707.14	Dync1h1	0.125486	8.67237	0.124469	0.729358	0.869351	3065	2098	3581	10828	9568	9070	3015	4250	1609	2937	11498
ENSMUSG00000018727.20	Cpsf4l	-0.455609	0.147512	0.744775	0.402308	0.650687	5	2	4	27	30	7	5	14	13	9	20
ENSMUSG00000018733.11	Pex12	0.231033	3.2612	1.17248	0.296725	0.563511	118	91	128	195	173	115	69	147	64	103	89
ENSMUSG00000018736.15	Ndel1	-0.399334	6.62425	2.07744	0.170924	0.440619	1202	1057	1139	1201	952	947	1157	1443	1072	1205	999
ENSMUSG00000018740.15	Slc25a35	-0.176837	2.86831	0.537177	0.47539	0.705611	58	45	60	211	130	95	60	92	46	91	142
ENSMUSG00000018750.15	Zbtb4	-0.336918	7.47727	3.11087	0.0990094	0.351586	1622	1518	1841	3138	2663	2237	2103	2314	1575	1705	3143
ENSMUSG00000018752.20	Tnfsfm13	-0.444378	1.70257	0.877647	0.364324	0.619982	41	46	44	23	13	20	34	44	34	48	30
ENSMUSG00000018761.15	Mpdu1	-0.666105	5.67658	3.76386	0.0722526	0.31089	488	648	548	450	332	447	672	815	639	586	571
ENSMUSG00000018765.6	Fxr2	-0.439821	7.04108	3.32804	0.0889653	0.337315	1315	1417	1407	1787	1417	1402	1650	1787	1406	1346	1841
ENSMUSG00000018770.10	Atp5g3	-0.732056	8.10754	3.43415	0.0845044	0.330424	3126	3257	3108	2025	1751	1721	3883	4384	3498	3528	2623
ENSMUSG00000018774.14	Cd68	0.415379	3.04777	1.50356	0.239836	0.512012	77	79	107	126	76	288	76	129	48	54	66
ENSMUSG00000018776.11	Slc35g3	-0.368176	-1.59526	0.412706	0.554077	0.762769	2	0	2	4	3	2	3	2	1	1	4
ENSMUSG00000018796.14	Acsl1	0.0498123	5.00067	0.086849	0.772436	0.892836	391	250	386	615	455	567	252	483	179	380	475
ENSMUSG00000018800.15	Abca5	0.789361	4.67767	7.80489	0.0140734	0.171133	265	123	329	949	636	550	190	176	101	191	360
ENSMUSG00000018809.3	Smyd4	-0.127782	3.17321	0.255523	0.620876	0.80454	99	94	139	122	96	105	76	159	52	117	120
ENSMUSG00000018819.11	Lsp1	0.333987	2.36268	0.859625	0.369153	0.623947	55	50	75	44	50	161	31	67	42	43	52
ENSMUSG00000018820.14	Zfyve27	0.0753344	6.12406	0.123492	0.730376	0.869734	639	479	798	1696	1270	1257	605	867	372	569	1469
ENSMUSG00000018821.4	Avpi1	-0.727303	4.68047	2.48056	0.137013	0.40044	327	321	295	136	120	147	296	451	332	386	204
ENSMUSG00000018822.8	Sfrp5	-0.537579	2.78308	1.16879	0.297459	0.564254	78	113	68	33	22	68	108	76	70	66	100
ENSMUSG00000018830.11	Myh11	0.236804	2.46389	0.204267	0.658044	0.827127	26	22	42	153	138	150	35	34	16	24	190
ENSMUSG00000018841.18	Rad51d	-0.191934	4.03167	1.0714	0.317733	0.581996	187	141	206	275	200	209	144	204	129	196	284
ENSMUSG00000018844.7	Fndc8	0.422143	0.640975	0.497098	0.492047	0.717894	8	3	6	74	49	13	7	18	3	10	32
ENSMUSG00000018845.15	Unc45b	0.561182	0.442362	1.31961	0.269423	0.538617	5	9	10	60	21	25	9	7	8	4	24
ENSMUSG00000018846.9	Pank3	0.652388	5.24824	5.78288	0.0301839	0.222749	368	179	414	1352	1070	753	275	373	168	324	473
ENSMUSG00000018848.5	Rars	0.277759	5.07176	0.992691	0.335566	0.596432	473	365	516	607	353	538	188	482	249	477	223
ENSMUSG00000018849.7	Wwc1	-0.943678	5.94628	23.5424	0.000238076	0.0226114	568	446	436	683	700	608	858	986	658	824	1145
ENSMUSG00000018858.16	Mrpl58	-0.355049	5.16669	1.52079	0.237291	0.509517	447	398	477	359	316	352	368	600	278	557	405
ENSMUSG00000018861.9	Fdxr	-0.266764	3.57428	2.34227	0.147616	0.413157	116	73	130	245	182	164	116	174	83	140	209
ENSMUSG00000018862.12	Otop3	0.273931	-1.96422	0.0672544	0.799055	0.906797	2	2	3	0	0	1	0	2	0	0	3
ENSMUSG00000018865.10	Sult4a1	-0.810603	8.99114	4.35658	0.05513	0.276756	5668	5900	5329	3428	3235	3154	6631	7778	6902	6319	6413
ENSMUSG00000018882.13	Mrpl45	-0.421046	5.28464	1.75396	0.206056	0.479695	503	463	458	391	332	313	431	645	376	553	377
ENSMUSG00000018893.16	Mb	-0.754442	-1.06599	1.49975	0.240405	0.512569	2	6	3	6	1	1	3	11	1	5	4
ENSMUSG00000018899.18	Irf1	3.26276	5.13439	37.9937	2.19078e-05	0.00666461	195	99	564	1501	1007	2211	41	103	41	73	87
ENSMUSG00000018900.8	Slc22a5	-0.185928	3.88251	1.22633	0.286313	0.554813	151	107	189	280	193	212	131	223	105	184	224
ENSMUSG00000018906.15	P4ha2	0.301702	3.33882	1.14203	0.302845	0.569256	91	48	94	311	238	202	70	130	44	86	182
ENSMUSG00000018907.11	Alox12e	-2.49848	-2.22068	6.0624	0.0270069	0.216662	0	0	1	0	0	0	2	0	2	1	1
ENSMUSG00000018909.16	Arrb1	-0.452136	8.35458	3.67432	0.0753573	0.317015	2659	2518	3006	5698	5272	4162	3793	3949	2697	2723	8172
ENSMUSG00000018919.11	Tm4sf5	0.0790339	-0.934473	0.0131298	0.910359	0.962588	6	8	6	1	2	4	1	9	3	4	3
ENSMUSG00000018920.12	Cxcl16	2.36327	2.97481	23.9799	0.000218604	0.0216237	40	46	138	230	199	435	24	33	24	27	13
ENSMUSG00000018921.12	Pelp1	-0.237554	4.48459	1.02981	0.326984	0.588957	166	137	208	498	328	456	251	285	127	210	503
ENSMUSG00000018923.14	Med11	-0.624179	3.05257	4.14739	0.0605595	0.288605	92	68	104	89	74	73	65	168	80	156	79
ENSMUSG00000018925.4	Heatr9	2.06711	-2.13295	3.59611	0.0781999	0.321116	0	1	0	1	2	5	0	1	0	0	0
ENSMUSG00000018927.4	Ccl6	-0.0433956	1.44885	0.00823229	0.928958	0.96971	33	41	48	18	12	28	22	43	23	33	19
ENSMUSG00000018930.4	Ccl4	6.57657	2.67943	48.7454	5.57549e-06	0.00486389	14	11	114	381	176	400	0	3	1	1	1
ENSMUSG00000018931.4	Natd1	-0.305725	4.1487	2.88759	0.110798	0.367554	157	147	204	317	231	245	196	256	145	164	314
ENSMUSG00000018932.10	Map2k3	0.294563	3.37618	1.32225	0.268964	0.538157	93	95	137	200	138	265	69	148	35	111	170
ENSMUSG00000018965.12	Ywhah	-0.109931	9.41795	0.226203	0.641502	0.816709	8842	6016	9175	10405	9526	8028	5962	11497	3656	9377	9967
ENSMUSG00000018974.8	Sart3	0.088	5.09664	0.133885	0.719768	0.86419	265	209	383	830	643	736	305	450	155	299	695
ENSMUSG00000018983.10	E2f2	-0.39866	0.346409	0.867219	0.367107	0.622208	8	16	4	14	16	20	19	16	6	9	21
ENSMUSG00000018986.11	Slfn3	2.12275	0.167244	10.8646	0.00514358	0.11958	7	2	8	50	28	42	2	6	0	3	8
ENSMUSG00000018995.13	Nars2	-0.0316232	2.96273	0.0157467	0.901877	0.959087	117	67	95	154	103	68	71	116	58	95	78
ENSMUSG00000018999.15	Slc35b4	-0.164271	5.44523	0.499134	0.491177	0.717158	456	273	475	939	777	569	362	681	183	482	1018
ENSMUSG00000019027.9	Dnah1	-0.597423	2.80714	6.58278	0.0220708	0.200484	67	58	55	102	93	73	73	113	50	69	174
ENSMUSG00000019039.15	Dalrd3	-0.477722	5.85575	7.32475	0.0167315	0.183129	536	472	555	1077	825	558	676	947	499	688	902
ENSMUSG00000019054.14	Fis1	-0.736959	7.63415	2.16224	0.162991	0.43165	1975	2921	2322	1042	892	1104	2276	3056	3130	2664	1442
ENSMUSG00000019055.16	Plod1	-0.356208	4.6993	1.78528	0.202274	0.476134	160	159	197	561	521	418	367	260	210	232	507
ENSMUSG00000019066.14	Rab3d	-0.377746	3.73561	2.93385	0.108222	0.364255	127	124	178	176	155	145	125	187	133	166	197
ENSMUSG00000019080.9	Mfsd3	-0.581003	2.96161	3.76423	0.0722402	0.31089	81	78	101	86	62	61	77	142	79	112	91
ENSMUSG00000019082.19	Slc25a22	0.525757	7.40181	1.86924	0.192566	0.464867	1208	648	1539	5457	4036	5366	1274	1715	519	1149	3384
ENSMUSG00000019087.14	Atp6ap1	-0.281339	8.14507	2.02205	0.176368	0.446782	3297	2549	3266	4155	3572	3513	2662	4406	1913	3480	5168
ENSMUSG00000019088.15	Dnase1l1	-0.046808	0.734026	0.013679	0.908513	0.961671	11	16	30	31	8	23	8	20	15	22	18
ENSMUSG00000019102.11	Aldh3a1	-0.691686	-0.148263	2.04133	0.174449	0.444543	10	5	10	10	4	7	13	20	2	12	6
ENSMUSG00000019122.9	Ccl9	0.169086	1.25942	0.178091	0.679264	0.841094	35	25	20	30	26	50	11	27	24	35	12
ENSMUSG00000019124.11	Scrn1	-0.296638	7.81848	2.62696	0.12679	0.387267	2521	1773	2358	3607	3182	3137	2085	3517	1450	2784	4417
ENSMUSG00000019132.12	BC005537	0.208085	7.41418	1.18182	0.294882	0.562276	1698	1141	1844	5029	3017	3208	1410	2169	1144	1841	2008
ENSMUSG00000019139.11	Isyna1	-0.641781	4.82523	9.03109	0.00922883	0.149399	285	235	301	396	337	214	361	489	231	333	517
ENSMUSG00000019143.16	Hars2	0.266469	4.01108	0.891996	0.360545	0.616986	200	83	183	433	316	290	80	259	51	205	262
ENSMUSG00000019146.3	Cacng2	-0.0137314	5.77932	0.0026453	0.959689	0.98319	406	341	482	1462	999	1166	550	562	293	464	1272
ENSMUSG00000019158.10	Tmem160	-1.13481	5.42095	3.85499	0.0692478	0.304688	333	585	457	140	139	155	595	670	763	657	275
ENSMUSG00000019173.12	Rab5c	-0.376853	7.52608	2.18635	0.16082	0.429231	1843	1937	2085	2178	1664	2813	2237	2675	1835	2215	2057
ENSMUSG00000019178.18	Styxl1	2.41513	-1.14834	8.3671	0.0115586	0.161333	2	1	1	22	6	10	2	1	0	1	0
ENSMUSG00000019179.11	Mdh2	-0.543513	7.89685	3.27307	0.0913871	0.341368	2832	2566	2878	2211	1916	2079	3064	4252	2082	2960	3122
ENSMUSG00000019188.17	H13	-0.0980398	5.91439	0.302249	0.590918	0.786138	542	534	660	1195	978	928	634	875	318	631	1072
ENSMUSG00000019189.14	Rnf145	0.127293	6.33828	0.498399	0.491491	0.717438	969	674	1042	1541	1321	1333	557	1164	411	982	1299
ENSMUSG00000019194.16	Scn1b	-0.592504	8.68076	3.64917	0.076258	0.318405	4368	4588	5112	3791	3297	3211	4908	7080	3895	5691	5381
ENSMUSG00000019210.11	Atp6v1e1	-0.123867	8.0907	0.127914	0.725803	0.867707	4295	2985	4262	2888	2497	2218	2101	4856	1765	4502	2619
ENSMUSG00000019214.15	Chtf18	-0.307384	1.01899	1.36208	0.262178	0.531279	17	17	16	31	29	29	22	22	15	26	28
ENSMUSG00000019230.15	Lhx9	0.484413	2.21564	3.21925	0.0938352	0.344812	42	25	61	154	81	95	40	44	21	36	63
ENSMUSG00000019232.15	Etnppl	2.07892	5.74931	56.8776	2.30102e-06	0.00392322	691	573	1272	1753	1176	1429	90	278	93	314	364
ENSMUSG00000019235.10	Rps6kl1	-0.328859	5.06632	2.8222	0.114568	0.372057	330	329	417	546	365	372	349	493	297	390	500
ENSMUSG00000019254.17	Ppp1r12c	-0.503213	6.79669	5.46365	0.0343594	0.234345	1039	1065	1072	1592	1327	1292	1343	1564	1255	1173	1580
ENSMUSG00000019256.18	Ahr	0.3095	2.07304	1.02278	0.328586	0.590025	47	14	48	130	85	72	41	43	21	34	58
ENSMUSG00000019261.4	Map1s	-0.581103	5.67761	7.50096	0.0156936	0.178144	396	422	524	764	641	626	739	697	458	444	1027
ENSMUSG00000019278.6	Dpep1	0.842647	-0.985646	2.06294	0.172329	0.442643	4	9	4	4	7	5	2	3	1	6	1
ENSMUSG00000019295.9	Tmem129	-0.296481	4.82068	2.04768	0.173823	0.443898	303	291	353	412	312	308	313	430	214	321	435
ENSMUSG00000019297.10	Nop9	-0.473771	3.67038	5.05145	0.0407905	0.248456	125	102	131	169	125	205	124	211	126	177	159
ENSMUSG00000019301.6	Hsd17b1	-1.1597	-1.29904	3.46058	0.083435	0.329138	1	0	1	4	6	2	2	3	5	2	8
ENSMUSG00000019302.17	Atp6v0a1	-0.242509	8.18571	0.76447	0.396309	0.645924	2538	1651	2688	5902	5284	5170	3316	3599	1478	2252	7739
ENSMUSG00000019303.15	Psmc3ip	-0.403335	1.25907	1.0291	0.327146	0.588957	33	19	25	38	27	12	19	40	20	46	14
ENSMUSG00000019312.11	Grb7	-0.0794431	1.89265	0.0835187	0.776711	0.894742	31	28	69	59	43	48	40	48	23	42	47
ENSMUSG00000019320.15	Noxo1	0.0407552	0.251889	0.0168294	0.89858	0.957325	12	7	10	26	13	21	6	12	7	13	19
ENSMUSG00000019326.15	Aoc3	1.61694	0.470225	6.34645	0.0241698	0.207924	10	3	2	88	27	42	3	7	4	7	10
ENSMUSG00000019338.14	Zfp687	-0.0307345	5.52723	0.0205777	0.887927	0.952949	346	420	481	902	675	998	470	522	284	422	902
ENSMUSG00000019359.15	Gdpd2	-0.697456	2.61052	6.64865	0.021524	0.197806	65	41	44	94	98	37	61	90	44	91	140
ENSMUSG00000019362.9	D8Ertd738e	-0.705522	5.74338	4.80292	0.0453487	0.259017	605	534	543	487	417	500	501	1079	678	830	459
ENSMUSG00000019368.14	Sec14l4	-1.00562	-0.878983	6.16474	0.0259423	0.212907	3	3	3	7	4	2	3	7	5	6	9
ENSMUSG00000019370.11	Calm3	-0.541491	10.2254	3.747	0.0728255	0.31219	13267	12574	13312	12901	11804	10613	14799	18963	11454	14541	17468
ENSMUSG00000019373.12	Cops3	-0.0761589	5.82323	0.0505542	0.825267	0.922179	881	687	729	751	488	562	438	813	554	858	371
ENSMUSG00000019428.17	Fkbp8	-0.841154	8.94565	4.00193	0.0647093	0.296242	4972	6058	4903	3486	2998	3130	6687	7052	7874	5804	4617
ENSMUSG00000019429.8	Ffar3	-1.11935	-1.76643	2.76095	0.118241	0.37661	1	2	1	2	0	1	1	5	2	2	1
ENSMUSG00000019432.16	Ddx39b	0.0622886	7.02478	0.0956118	0.761598	0.887	1180	1058	1540	3067	2025	2378	1215	1900	546	1394	2255
ENSMUSG00000019433.10	Gipc1	-0.819447	5.71371	6.02459	0.027413	0.217594	533	579	516	457	386	358	611	900	713	743	563
ENSMUSG00000019437.18	Tlcd1	-0.69606	4.85373	5.10471	0.0398848	0.246574	317	314	329	265	219	195	295	510	312	424	412
ENSMUSG00000019461.13	Plscr3	-0.126936	3.6058	0.357753	0.559065	0.765694	100	89	146	253	163	223	129	179	58	121	232
ENSMUSG00000019464.7	Ptger1	-0.0202218	2.83177	0.00453654	0.947228	0.977585	54	43	64	188	125	138	56	62	36	67	186
ENSMUSG00000019467.16	Arhgef25	-0.373908	6.7836	3.26895	0.0915718	0.341584	1324	967	1313	1630	1314	1045	1191	1797	882	1292	1736
ENSMUSG00000019470.13	Xab2	0.00521772	5.25823	0.000848402	0.977164	0.992276	375	300	517	686	553	716	331	536	206	435	652
ENSMUSG00000019471.11	Cdc37	-0.616521	7.22586	4.38104	0.0545332	0.27552	1582	1600	1642	1532	1284	1336	1723	2378	1843	1963	1640
ENSMUSG00000019478.18	Rab4a	-0.167489	4.97209	0.609038	0.447814	0.68411	327	336	437	430	379	380	345	486	218	345	425
ENSMUSG00000019487.12	Trip10	0.344121	2.46294	2.30289	0.15082	0.417048	47	55	57	115	96	127	44	67	31	43	74
ENSMUSG00000019489.8	Cd70	-1.45354	-0.611885	5.97014	0.0280104	0.218018	0	6	3	2	4	7	12	9	4	9	8
ENSMUSG00000019494.15	Cops6	-0.728729	6.777	2.74721	0.119085	0.377869	1261	1396	1181	722	622	690	1293	1650	1730	1368	873
ENSMUSG00000019505.8	Ubb	-0.267444	10.5876	0.843919	0.373439	0.628053	20074	15953	20694	17790	15129	16406	13711	27778	11218	22971	17965
ENSMUSG00000019518.12	Ap4m1	0.0549424	4.39534	0.108503	0.746606	0.878737	225	175	228	492	338	328	182	320	124	196	331
ENSMUSG00000019528.19	Gyg	-0.208347	4.60022	0.695537	0.417934	0.662045	330	225	292	314	322	259	206	431	194	359	224
ENSMUSG00000019539.12	Rcn3	-0.587848	2.27952	5.78964	0.0301021	0.222749	40	41	41	52	55	77	55	88	31	58	93
ENSMUSG00000019558.15	Slc6a8	0.0154075	6.658	0.00658586	0.936439	0.972189	934	862	1127	1901	1440	2180	841	1307	700	936	1822
ENSMUSG00000019564.13	Arid3a	-0.0112155	2.57115	0.00162095	0.968439	0.987772	47	40	44	142	117	115	45	78	27	56	133
ENSMUSG00000019577.7	Pdk4	0.96902	3.41266	16.6481	0.0010692	0.0545105	100	103	131	292	252	282	63	94	32	70	136
ENSMUSG00000019578.12	Ubxn6	-0.664608	6.7264	4.2532	0.057738	0.28256	1107	1236	1084	1048	860	796	1196	1619	1382	1462	1141
ENSMUSG00000019579.14	Mydgf	-0.866303	5.38645	5.36612	0.0357668	0.236577	460	460	357	335	265	320	482	645	645	645	356
ENSMUSG00000019590.17	Cyb561	-0.537658	5.99101	4.84872	0.0444655	0.257016	737	604	724	704	607	621	737	1046	651	761	877
ENSMUSG00000019647.17	Sema6a	0.600666	4.10657	1.1217	0.30703	0.572497	80	42	88	671	474	615	90	142	39	90	461
ENSMUSG00000019659.9	Ccdc12	-0.526803	4.38545	5.29889	0.0367765	0.239033	203	199	227	257	214	244	207	393	199	314	230
ENSMUSG00000019689.5	Fmc1	-0.859919	4.26436	5.67213	0.0315616	0.226979	221	176	202	172	156	98	227	344	257	310	160
ENSMUSG00000019699.17	Akt3	0.198652	6.7875	1.23676	0.284353	0.552749	1394	767	1266	2665	2114	1724	839	1585	609	1254	1454
ENSMUSG00000019710.14	Mrpl24	-0.419473	5.18783	2.54408	0.132458	0.394826	417	386	345	585	399	323	339	568	447	460	367
ENSMUSG00000019715.15	Gle1	-0.387456	5.81878	2.62753	0.126752	0.387267	631	629	658	660	531	624	611	849	500	653	889
ENSMUSG00000019718.9	L3hypdh	-0.48005	1.43958	2.80786	0.115415	0.373077	31	22	28	36	35	19	27	47	21	38	33
ENSMUSG00000019726.13	Lyst	0.997838	5.13702	8.77272	0.0100644	0.154133	380	150	484	1216	1018	845	114	392	91	300	461
ENSMUSG00000019731.14	Slc35e1	-0.136328	6.11821	0.554735	0.468395	0.700965	704	546	726	1255	988	1284	725	909	455	646	1339
ENSMUSG00000019732.15	Calr3	-0.102587	0.458132	0.0522718	0.822378	0.920315	13	17	24	13	7	14	9	19	15	12	12
ENSMUSG00000019734.17	Tmc4	1.11833	2.10021	4.06945	0.0627426	0.292467	24	13	28	267	132	78	13	32	8	21	78
ENSMUSG00000019737.15	Syne4	0.544697	2.23919	1.53282	0.235534	0.507918	25	19	63	181	130	73	18	46	10	50	96
ENSMUSG00000019738.16	Polr2i	-0.655801	3.93696	3.08533	0.100278	0.35294	151	204	169	132	95	109	154	284	167	256	142
ENSMUSG00000019761.11	Krt10	-0.306891	2.56093	1.21399	0.288654	0.556793	68	65	50	100	85	41	51	115	43	75	73
ENSMUSG00000019762.5	Iyd	-0.852504	-0.585937	3.64701	0.0763357	0.318405	4	2	5	11	7	3	9	10	3	11	4
ENSMUSG00000019763.12	Rmnd1	-0.124442	4.17962	0.372908	0.550959	0.760918	209	152	170	427	300	183	140	296	124	257	230
ENSMUSG00000019767.13	Ccdc170	2.26201	-0.654396	8.14959	0.0124645	0.164772	4	1	1	34	12	17	0	1	1	1	5
ENSMUSG00000019768.17	Esr1	0.745289	1.57684	3.14441	0.0973723	0.34964	20	18	15	99	79	85	27	25	18	11	27
ENSMUSG00000019772.6	Vip	0.253281	3.66252	0.734921	0.405362	0.65267	196	117	185	319	139	134	74	157	95	193	87
ENSMUSG00000019773.8	Fbxo5	0.853311	-0.0609156	2.81632	0.114914	0.372448	5	6	4	36	14	26	2	4	4	11	9
ENSMUSG00000019774.9	Mtrf1l	-0.00503962	2.09943	0.000474219	0.982926	0.994867	43	38	48	92	67	53	34	61	32	56	41
ENSMUSG00000019775.18	Rgs17	0.443126	5.11347	1.77961	0.202952	0.476461	235	209	294	1498	721	719	330	225	262	227	465
ENSMUSG00000019777.17	Hdac2	-0.0648876	5.42808	0.0658661	0.801091	0.907589	659	358	508	868	586	388	377	621	366	608	363
ENSMUSG00000019779.16	Frk	-0.803643	-1.04349	1.78692	0.202079	0.475951	2	0	2	8	5	5	2	3	5	10	3
ENSMUSG00000019782.11	Rwdd1	-0.150493	4.93735	0.183075	0.675086	0.838305	481	367	409	357	229	287	282	474	268	469	209
ENSMUSG00000019785.15	Clvs2	0.215431	4.27048	0.850022	0.371765	0.626587	294	186	255	401	283	213	147	280	124	250	157
ENSMUSG00000019787.10	Trdn	-0.239797	-0.853416	0.106479	0.748892	0.879903	2	10	1	9	7	0	7	5	4	2	5
ENSMUSG00000019789.10	Hey2	0.425829	2.31431	1.91258	0.187787	0.459975	24	45	57	134	123	91	29	58	18	54	75
ENSMUSG00000019790.18	Stxbp5	0.800802	5.65384	6.73395	0.0208391	0.19482	533	220	632	1679	1284	1277	239	484	150	449	787
ENSMUSG00000019791.13	Hint3	0.200999	2.39532	0.54794	0.471081	0.702582	53	60	68	108	91	57	30	57	53	45	65
ENSMUSG00000019792.9	Trmt11	-0.214413	2.36273	0.430835	0.521951	0.740337	66	48	67	88	48	48	43	58	56	83	38
ENSMUSG00000019794.14	Katna1	0.64199	3.00944	5.10992	0.0397975	0.246303	69	49	109	306	174	141	56	112	28	81	63
ENSMUSG00000019795.18	Pcmt1	-0.0878757	6.9619	0.0876228	0.771455	0.892347	1994	1214	1804	1585	1334	1197	893	2016	965	1972	1174
ENSMUSG00000019796.13	Lrp11	-0.18344	7.21821	0.667165	0.427374	0.668721	2028	1279	1952	2250	1788	1676	1318	2634	1049	2079	1713
ENSMUSG00000019797.12	Mtres1	-0.309636	3.88466	0.998819	0.334127	0.595177	208	176	163	161	132	135	153	248	135	196	137
ENSMUSG00000019802.14	Sec63	0.614794	5.46435	7.29537	0.0169121	0.183818	497	240	515	1525	915	991	251	478	220	444	520
ENSMUSG00000019803.12	Nr2e1	-0.468492	2.37569	2.93907	0.107936	0.363856	48	36	46	103	73	53	35	99	22	95	97
[truncated: 21,555 more rows]

## Sheet: DEGs n=437
ensembl_ID	gene_ID	logFC	logCPM	F	PValue	FDR	BrainBA5day5	BrainBA5day6	BrainBA5day6	BrainBA5day6	BrainBA5day6	BrainBA5day7	BrainUVcontol1	BrainUVcontol2	BrainUVcontol3	BrainUVcontol4	BrainUVcontol5
ENSMUSG00000000204.17	Slfn4	8.95905	3.66281	38.9002	1.93134e-05	0.00653239	25	3	70	995	555	712	0	2	0	0	0
ENSMUSG00000000386.17	Mx1	7.55648	6.08372	43.6609	1.03093e-05	0.00534278	146	33	513	5094	2730	4204	2	24	2	2	8
ENSMUSG00000000682.8	Cd52	2.192	2.91351	20.8294	0.000414074	0.0314616	76	61	132	176	117	420	8	35	33	37	16
ENSMUSG00000000732.10	Icosl	1.65281	3.74745	20.4996	0.000444242	0.0322606	87	86	198	553	374	465	33	97	31	58	142
ENSMUSG00000000791.10	Il12rb1	3.65785	3.06848	23.8527	0.000224073	0.0217713	21	19	50	455	217	636	8	20	9	10	14
ENSMUSG00000000817.11	Fasl	4.1039	-1.142	20.9644	0.000402396	0.0306733	1	3	4	17	6	13	0	0	1	0	0
ENSMUSG00000000982.6	Ccl3	6.14265	3.29306	35.9229	2.94717e-05	0.00771308	14	9	204	566	249	650	3	7	1	2	0
ENSMUSG00000001123.16	Lgals9	3.10246	4.82046	29.487	8.08672e-05	0.0130462	154	72	283	1424	765	1869	58	89	32	56	66
ENSMUSG00000001768.17	Rin2	1.05677	4.87374	24.094	0.000213829	0.0214919	383	209	387	1105	614	677	129	287	108	251	263
ENSMUSG00000002325.16	Irf9	2.35906	5.22905	29.1257	8.59655e-05	0.0134111	294	170	458	1976	1305	1407	69	256	47	101	214
ENSMUSG00000002699.14	Lcp2	2.07482	1.96788	23.8404	0.000224609	0.0217713	35	17	51	122	91	200	9	26	10	13	17
ENSMUSG00000002831.15	Plin4	4.06828	5.09421	74.2825	4.68616e-07	0.00284823	358	425	644	921	765	1964	14	52	15	23	111
ENSMUSG00000002847.8	Pla1a	2.31772	1.75219	24.8592	0.000184719	0.0200501	19	22	35	139	64	183	7	12	9	11	15
ENSMUSG00000002910.12	Arrdc2	1.32666	4.56256	30.9842	6.3112e-05	0.0114349	275	340	475	517	346	625	107	168	64	177	215
ENSMUSG00000003283.16	Hck	2.28615	2.62122	32.2568	5.14582e-05	0.010494	52	27	124	229	127	283	14	21	18	25	24
ENSMUSG00000003617.17	Cp	2.38554	4.70141	30.1561	7.23097e-05	0.0125234	162	116	301	1588	799	1007	64	90	46	123	110
ENSMUSG00000004056.16	Akt2	-0.912547	6.90109	23.9781	0.000218683	0.0216237	850	831	929	1762	1421	1220	1654	1894	1395	1544	1986
ENSMUSG00000004296.15	Il12b	9.75928	2.29905	48.0887	3.34193e-05	0.00828588	13	8	141	225	135	279	0	0	0	0	0
ENSMUSG00000004328.16	Hif3a	2.74497	3.50889	20.1155	0.000482601	0.0338309	60	33	137	529	296	697	17	24	10	20	92
ENSMUSG00000004709.15	Cd244a	5.44576	-0.187347	33.1969	4.44177e-05	0.0095388	6	2	10	25	17	52	1	0	0	0	0
ENSMUSG00000006517.6	Mvd	-1.24972	3.959	31.4638	5.83984e-05	0.011282	117	110	121	120	145	117	190	299	175	262	301
ENSMUSG00000008604.12	Ubqln4	-0.837692	6.97203	19.2453	0.000584358	0.0383397	1089	895	1027	1699	1528	1224	1634	2144	1382	1385	2322
ENSMUSG00000009585.19	Apobec3	2.82585	3.58693	20.1608	0.000477891	0.0338025	48	18	108	698	456	599	23	43	12	31	47
ENSMUSG00000010064.16	Slc38a3	-0.877931	6.13298	18.2186	0.000737399	0.0437498	588	560	562	795	677	832	952	1050	587	867	1726
ENSMUSG00000010358.14	Ifi35	2.89871	4.02621	35.9781	2.92348e-05	0.00771308	102	54	205	846	527	816	28	61	26	39	42
ENSMUSG00000012519.15	Mlkl	5.44642	1.60436	40.443	1.56624e-05	0.00603363	11	6	43	167	92	172	0	1	0	3	2
ENSMUSG00000015340.11	Cybb	3.87687	2.20435	26.6643	0.000132304	0.016576	13	6	64	215	143	294	3	6	3	11	5
ENSMUSG00000015437.6	Gzmb	6.21023	2.30442	21.7434	0.00034196	0.0288541	3	6	31	61	157	548	0	5	0	1	0
ENSMUSG00000015839.7	Nfe2l2	1.09938	4.0862	19.3727	0.000568023	0.037582	155	119	213	624	424	461	94	143	53	140	152
ENSMUSG00000015947.11	Fcgr1	1.92468	3.32674	36.7995	2.59551e-05	0.00736563	104	79	162	365	261	339	20	70	33	58	32
ENSMUSG00000015950.14	Ncf1	1.14331	3.21246	20.4711	0.000446972	0.0322944	101	101	152	236	142	279	39	83	54	61	55
ENSMUSG00000016206.7	H2-M3	1.58297	2.28238	23.4427	0.000242786	0.0227832	40	38	66	164	96	193	21	23	21	26	27
ENSMUSG00000016239.12	Lonrf3	1.42828	2.1257	18.9584	0.000623118	0.0389962	46	22	53	173	141	97	19	29	11	24	40
ENSMUSG00000016496.8	Cd274	6.07147	5.5766	35.1168	3.31912e-05	0.00828588	85	33	297	2977	2030	3324	3	30	4	12	27
ENSMUSG00000017652.17	Cd40	2.79595	1.4498	25.828	0.000154124	0.0181855	18	8	57	97	74	122	5	8	3	13	3
ENSMUSG00000017724.15	Etv4	-1.22646	3.21938	25.6633	0.000158892	0.018381	79	61	47	103	76	92	143	142	123	143	143
ENSMUSG00000017754.14	Pltp	-1.31338	5.66788	27.0986	0.000122378	0.0161123	430	301	425	447	404	336	1006	876	432	640	1137
ENSMUSG00000017830.16	Dhx58	3.26811	3.59724	33.2052	4.43609e-05	0.0095388	65	44	136	506	283	876	13	36	12	30	26
ENSMUSG00000018849.7	Wwc1	-0.943678	5.94628	23.5424	0.000238076	0.0226114	568	446	436	683	700	608	858	986	658	824	1145
ENSMUSG00000018899.18	Irf1	3.26276	5.13439	37.9937	2.19078e-05	0.00666461	195	99	564	1501	1007	2211	41	103	41	73	87
ENSMUSG00000018920.12	Cxcl16	2.36327	2.97481	23.9799	0.000218604	0.0216237	40	46	138	230	199	435	24	33	24	27	13
ENSMUSG00000018930.4	Ccl4	6.57657	2.67943	48.7454	5.57549e-06	0.00486389	14	11	114	381	176	400	0	3	1	1	1
ENSMUSG00000019232.15	Etnppl	2.07892	5.74931	56.8776	2.30102e-06	0.00392322	691	573	1272	1753	1176	1429	90	278	93	314	364
ENSMUSG00000019970.16	Sgk1	1.75408	6.78895	56.4323	2.40871e-06	0.00392322	1658	1662	2497	2586	1669	2737	361	779	268	623	706
ENSMUSG00000020077.15	Srgn	1.56064	3.77438	19.0185	0.000614762	0.0389962	124	105	247	426	199	589	57	88	59	97	41
ENSMUSG00000020120.16	Plek	1.30064	4.15389	17.5313	0.000865497	0.0480019	211	115	269	609	341	590	66	157	61	182	74
ENSMUSG00000020374.17	Rasgef1c	-0.886413	3.91309	17.5314	0.00086547	0.0480019	153	98	115	147	196	144	187	266	145	186	310
ENSMUSG00000020572.9	Nampt	1.42153	5.72838	23.1461	0.000257438	0.0238728	569	365	712	2236	1140	1679	207	311	253	437	240
ENSMUSG00000020638.9	Cmpk2	3.24749	6.71903	33.1781	4.45473e-05	0.0095388	617	253	1292	7371	4398	3716	112	358	107	289	193
ENSMUSG00000020641.17	Rsad2	6.12152	6.46632	49.1101	5.34549e-06	0.00486389	260	93	700	6599	3875	4841	12	50	15	25	28
ENSMUSG00000020676.3	Ccl11	3.97539	-0.398064	18.9392	0.00062582	0.0389962	2	2	5	43	11	33	0	2	0	1	0
ENSMUSG00000020707.7	Rnf135	1.38056	2.91549	21.4373	0.00036438	0.0297884	83	34	111	295	183	221	38	52	23	49	55
ENSMUSG00000021025.9	Nfkbia	1.46125	4.83758	29.7312	7.76167e-05	0.0128481	270	208	441	855	584	1169	127	195	95	176	211
ENSMUSG00000021091.9	Serpina3n	3.45592	6.53584	20.0075	0.000494064	0.0341266	244	177	562	4099	1621	8915	105	258	73	158	237
ENSMUSG00000021109.14	Hif1a	0.980685	5.46207	17.5378	0.000864173	0.0480019	510	282	636	1454	864	1248	253	309	164	425	444
ENSMUSG00000021583.8	Erap1	2.04672	3.7771	23.75	0.000228602	0.0220136	105	49	145	720	396	567	42	60	37	64	69
ENSMUSG00000021614.17	Vcan	2.25644	4.27383	20.1311	0.000480974	0.0338306	118	61	180	1266	598	747	33	77	35	96	118
ENSMUSG00000021871.20	Gm49342	2.06145	2.59978	27.346	0.000117102	0.0158358	56	46	93	253	142	216	21	30	29	13	15
ENSMUSG00000021886.8	Gpr65	3.84349	-0.227495	25.9795	0.000149884	0.0179675	5	3	11	28	11	47	0	1	0	2	1
ENSMUSG00000021998.17	Lcp1	1.39471	3.77736	19.056	0.000609605	0.0389962	135	88	164	368	330	588	43	115	39	97	118
ENSMUSG00000022014.16	Epsti1	3.26764	1.46117	34.5016	3.63925e-05	0.00877505	14	11	40	113	79	143	5	8	2	6	3
ENSMUSG00000022126.7	Acod1	6.39674	2.02169	38.3539	2.08322e-05	0.00666461	6	8	94	140	91	308	0	2	1	1	0
ENSMUSG00000022146.13	Osmr	3.43034	3.71569	25.653	0.000159197	0.018381	52	23	85	781	484	775	13	26	15	26	33
ENSMUSG00000022218.17	Tgm1	6.28685	2.57029	18.9758	0.000620682	0.0389962	5	5	19	147	49	783	0	6	0	1	0
ENSMUSG00000022505.10	Emp2	-0.886615	4.40799	22.7286	0.000279807	0.0251792	167	164	175	238	203	264	266	380	184	284	447
ENSMUSG00000022548.15	Apod	1.79429	9.27727	27.1661	0.000120911	0.0161123	4891	6069	9374	20845	9586	30403	2113	4378	1900	3399	2713
ENSMUSG00000022575.6	Gsdmd	1.87975	2.33231	21.8478	0.00033468	0.0286656	34	31	70	163	112	244	12	27	21	21	24
ENSMUSG00000022584.15	Ly6c2	4.47497	2.0541	38.8627	1.94136e-05	0.00653239	18	19	115	59	82	313	1	5	2	5	4
ENSMUSG00000022586.12	Ly6i	5.44738	-0.205802	31.3046	5.99167e-05	0.011282	2	3	16	22	17	49	0	0	0	1	0
ENSMUSG00000022867.12	Usp25	1.27765	4.76255	21.6771	0.000346681	0.0288541	292	161	315	1228	685	709	128	198	86	222	213
ENSMUSG00000022906.16	Parp9	3.79771	4.60095	36.5121	2.70524e-05	0.00758563	119	59	289	1671	907	1097	10	49	25	51	30
ENSMUSG00000023067.15	Cdkn1a	1.94662	5.64783	33.2504	4.40515e-05	0.0095388	350	442	715	1825	1002	2449	200	268	111	175	343
ENSMUSG00000023078.7	Cxcl13	4.87268	1.12149	31.3227	5.97414e-05	0.011282	7	3	27	109	60	131	0	1	1	3	1
ENSMUSG00000023186.15	Vwa5a	1.49824	4.62265	17.9539	0.000783975	0.0455945	181	119	252	1101	760	853	118	163	90	144	148
ENSMUSG00000023224.13	Serping1	2.7089	5.24988	18.5922	0.00067695	0.0409894	117	122	269	1601	950	2939	75	163	53	94	152
ENSMUSG00000023249.16	Parp3	2.37423	4.53831	27.9993	0.000104377	0.0148645	132	118	237	1048	662	1262	67	125	41	66	94
ENSMUSG00000023267.11	Gabrr2	1.85801	1.21641	21.1726	0.000385127	0.0303006	17	39	66	56	42	32	8	18	6	6	11
ENSMUSG00000023341.16	Mx2	5.6032	4.74773	44.1591	9.68361e-06	0.00530437	103	27	246	2157	1116	1280	4	21	3	13	16
ENSMUSG00000023959.11	Clic5	1.24482	3.33697	18.0826	0.000760936	0.044723	101	58	130	323	223	371	43	78	32	84	82
ENSMUSG00000024066.10	Xdh	3.10155	4.24044	25.83	0.000154068	0.0181855	84	61	203	1051	666	991	22	52	13	23	110
ENSMUSG00000024079.5	Eif2ak2	4.61648	5.18544	28.891	8.94748e-05	0.0137372	111	24	205	2949	1457	1931	13	38	17	35	45
ENSMUSG00000024087.5	Cyp1b1	2.25139	2.94288	23.7415	0.000228978	0.0220136	48	31	76	384	227	354	17	31	20	22	46
ENSMUSG00000024164.16	C3	4.27443	3.81199	17.3141	0.00091113	0.0493178	11	17	31	628	392	1355	16	10	9	7	26
ENSMUSG00000024222.18	Fkbp5	1.43603	5.42656	34.1944	3.81216e-05	0.008964	433	347	600	1455	951	1531	182	359	146	199	365
ENSMUSG00000024235.12	Map3k8	1.84369	1.88789	17.5282	0.000866129	0.0480019	26	18	43	149	104	144	15	25	3	20	20
ENSMUSG00000024338.16	Psmb8	3.12287	5.36373	40.4696	1.56067e-05	0.00603363	247	191	758	1511	993	2616	76	105	82	78	65
ENSMUSG00000024339.13	Tap2	2.72918	5.18792	20.173	0.000476628	0.0338025	123	105	290	1882	1308	2110	92	109	42	70	197
ENSMUSG00000024371.15	C2	2.24174	2.37059	19.4022	0.000564322	0.0374424	25	30	47	228	121	280	14	15	19	11	27
ENSMUSG00000024401.15	Tnf	7.11471	1.87903	40.1028	1.63943e-05	0.00603363	7	5	66	123	88	303	0	1	0	0	1
ENSMUSG00000024675.20	Ms4a4c	5.86514	1.49657	45.7707	7.93711e-06	0.00518965	13	7	55	143	67	160	0	3	0	1	0
ENSMUSG00000024677.14	Ms4a6b	3.1913	2.31519	37.0377	2.5084e-05	0.00722666	27	25	79	214	147	251	7	15	9	11	4
ENSMUSG00000024679.11	Ms4a6d	3.52043	2.67088	41.295	1.39869e-05	0.00577978	36	28	138	314	192	268	5	9	9	20	5
ENSMUSG00000024737.3	Slc15a3	2.50612	3.26694	24.5673	0.000195254	0.0205915	41	49	145	380	254	532	21	36	33	25	21
ENSMUSG00000024778.14	Fas	2.06428	1.79293	31.2123	6.08179e-05	0.011282	30	36	67	95	66	132	7	19	14	14	9
ENSMUSG00000024805.17	Pcgf5	1.41283	4.6481	19.9868	0.000496292	0.0341803	252	130	282	1162	799	611	144	142	73	172	184
ENSMUSG00000024998.18	Plce1	1.2417	4.48381	23.4672	0.000241618	0.0227643	188	171	344	680	564	702	89	172	71	163	233
ENSMUSG00000025017.11	Pik3ap1	2.51276	3.65378	27.9784	0.00010476	0.0148645	72	48	166	495	375	705	21	57	25	34	59
ENSMUSG00000025044.17	Msr1	3.90786	0.501888	24.6124	0.000193582	0.0205389	4	3	27	88	23	57	2	2	1	2	0
ENSMUSG00000025324.9	Atp10a	0.801907	4.01247	20.0956	0.000484691	0.0338766	193	145	218	471	356	306	99	143	68	130	198
ENSMUSG00000025491.15	Ifitm1	1.76296	2.5237	20.7101	0.000424703	0.0316447	40	38	74	210	169	212	17	32	25	35	17
ENSMUSG00000025492.7	Ifitm3	2.5844	5.84715	25.1221	0.00017578	0.0194624	268	198	750	2669	1677	3295	187	269	92	120	176
ENSMUSG00000025498.16	Irf7	5.02651	6.70996	47.7845	6.23746e-06	0.00510272	388	217	1158	5616	3203	7796	57	126	32	44	63
ENSMUSG00000025746.12	Il6	6.40214	0.61868	37.9411	2.20701e-05	0.00666461	8	1	24	98	40	62	1	0	0	0	0
ENSMUSG00000026072.13	Il1r1	1.44601	2.87427	21.6775	0.00034665	0.0288541	68	50	116	259	153	248	20	62	17	49	67
ENSMUSG00000026073.14	Il1r2	2.41058	0.230776	20.0491	0.000489613	0.0340186	10	8	17	25	11	65	3	5	1	4	3
ENSMUSG00000026088.16	Mitd1	2.3695	2.86613	27.3194	0.000117656	0.0158358	49	39	84	419	252	229	11	43	7	28	39
ENSMUSG00000026104.15	Stat1	3.68957	7.20938	32.2295	5.16812e-05	0.010494	672	281	1195	9988	6608	6909	154	318	93	195	390
ENSMUSG00000026222.17	Sp100	2.9297	3.28449	19.5058	0.000551518	0.0370793	34	14	84	614	347	489	20	34	7	23	34
ENSMUSG00000026259.15	Ngef	-1.05457	7.40462	18.6568	0.000667071	0.0406	1862	999	1367	1766	1821	1075	2311	3159	1948	2174	3081
ENSMUSG00000026271.16	Gpr35	2.93846	0.992307	23.5868	0.000236014	0.0225063	8	15	15	80	41	116	6	6	1	2	6
ENSMUSG00000026358.14	Rgs1	5.57781	0.506054	27.8339	0.000107444	0.0151542	4	4	11	47	20	120	0	1	0	1	0
ENSMUSG00000026389.17	Steap3	-1.23906	2.40848	19.7856	0.000518586	0.0354052	29	29	35	56	55	60	103	92	60	43	101
ENSMUSG00000026395.17	Ptprc	2.59632	1.95332	21.2956	0.000375327	0.0298664	23	17	42	124	100	240	9	4	7	18	14
ENSMUSG00000026536.10	Ifi211	6.83933	3.16019	51.1483	4.2431e-06	0.0043453	41	13	120	560	252	577	4	2	0	0	1
ENSMUSG00000026580.17	Selp	8.20631	0.867709	23.6555	0.000592023	0.0385781	4	1	7	77	82	115	0	0	0	0	0
ENSMUSG00000026581.15	Sell	3.64009	0.663637	23.9393	0.000220332	0.0216237	4	3	24	46	49	93	1	2	2	1	4
ENSMUSG00000026582.7	Sele	6.09752	1.38315	22.4304	0.000297141	0.0261962	1	1	19	179	104	134	0	3	0	0	0
ENSMUSG00000026628.14	Atf3	3.15298	2.66915	25.6946	0.000157972	0.018381	21	30	56	291	135	458	7	22	6	17	13
ENSMUSG00000026656.16	Fcgr2b	2.10507	2.89018	17.8298	0.000806963	0.0464724	51	29	91	270	159	430	15	39	32	27	21
ENSMUSG00000026822.15	Lcn2	6.97385	4.46559	59.2187	1.81776e-06	0.00389231	49	47	273	1294	778	1495	1	8	3	3	2
ENSMUSG00000026896.15	Ifih1	4.68654	5.15219	42.0493	1.26726e-05	0.00573239	130	68	343	3069	1460	1397	17	32	14	47	24
ENSMUSG00000026946.10	Nmi	2.37158	3.03106	28.1903	0.000100961	0.0146067	54	43	118	394	211	359	18	42	23	32	14
ENSMUSG00000026981.16	Il1rn	7.45992	3.29427	36.3804	2.75729e-05	0.00762166	13	6	131	528	258	792	1	4	0	0	0
ENSMUSG00000027078.15	Ube2l6	2.46748	5.05173	27.6933	0.00011013	0.0151791	205	128	491	1521	898	1724	109	124	94	67	97
ENSMUSG00000027398.14	Il1b	3.48189	0.822157	29.6563	7.85979e-05	0.0128481	8	21	53	54	59	31	0	4	1	7	1
ENSMUSG00000027399.2	Il1a	3.26351	0.847774	23.6081	0.00023503	0.0225037	19	7	38	66	30	82	0	9	0	5	2
ENSMUSG00000027514.15	Zbp1	6.08194	4.24314	46.3963	7.35823e-06	0.00514302	74	30	215	1098	658	1273	0	16	4	3	5
ENSMUSG00000027555.9	Car13	1.69323	1.70934	21.2698	0.000377356	0.0299268	28	20	37	138	72	117	12	21	8	22	13
ENSMUSG00000027639.17	Samhd1	2.7503	5.57462	22.0019	0.00032425	0.0280787	191	120	450	2872	1814	2254	85	165	50	111	267
ENSMUSG00000027832.6	Ptx3	4.38324	2.13841	22.7929	0.000276221	0.0250235	7	8	17	216	127	356	5	6	1	3	4
ENSMUSG00000027882.19	Stxbp3	1.17476	3.72777	22.4713	0.000294696	0.0261565	189	85	201	491	222	350	53	96	55	121	102
ENSMUSG00000027962.15	Vcam1	1.62881	5.0332	20.7638	0.000419878	0.0315968	237	157	379	1436	1015	1196	139	242	87	193	186
ENSMUSG00000027995.11	Tlr2	3.22559	3.88877	43.5565	1.04462e-05	0.00534278	68	92	213	704	346	890	18	38	26	28	31
ENSMUSG00000028037.14	Ifi44	6.45896	4.5796	28.8309	9.03992e-05	0.0137372	35	8	70	2147	944	1368	2	13	0	5	8
ENSMUSG00000028211.12	Trp53inp1	1.463	3.36682	20.2483	0.000468928	0.033369	117	53	127	372	268	354	28	55	35	76	98
ENSMUSG00000028268.15	Gbp3	4.84413	5.53562	37.017	2.51586e-05	0.00722666	190	62	438	3173	1612	2830	12	72	10	48	25
ENSMUSG00000028270.13	Gbp2	5.59212	6.76824	48.7858	5.54946e-06	0.00486389	306	191	1361	6043	3683	7762	28	98	20	55	30
ENSMUSG00000028362.3	Tnfsf8	4.675	0.432263	25.5618	0.000161913	0.0184237	2	4	18	75	27	70	0	3	0	0	1
ENSMUSG00000028766.11	Alpl	-1.1654	2.98411	23.9841	0.000218426	0.0216237	61	43	37	105	87	82	123	128	65	92	214
ENSMUSG00000028862.7	Map3k6	2.09488	3.1882	21.4775	0.000361342	0.0297884	69	51	101	325	138	579	24	54	22	41	36
ENSMUSG00000028919.12	Arhgef19	-1.01356	4.18168	18.9436	0.000625196	0.0389962	142	162	138	189	185	135	255	296	194	227	369
ENSMUSG00000029082.18	Bst1	3.34773	-0.153096	37.4624	2.36125e-05	0.00695211	7	8	12	24	22	32	1	0	1	2	2
ENSMUSG00000029298.16	Gbp9	4.31297	4.69377	29.2638	8.39747e-05	0.0132748	69	25	235	1601	952	1664	12	43	10	27	40
ENSMUSG00000029321.2	Slc10a6	6.11068	1.41197	22.9666	0.000266793	0.0243992	4	3	16	70	28	302	1	1	0	0	1
ENSMUSG00000029322.13	Plac8	5.59321	2.24695	69.1104	7.25541e-07	0.00284823	26	28	151	237	145	149	0	2	0	5	2
ENSMUSG00000029380.12	Cxcl1	6.55118	0.712694	69.1573	7.22584e-07	0.00284823	9	9	25	82	46	71	0	1	0	0	0
ENSMUSG00000029417.10	Cxcl9	7.01862	4.00335	45.0664	8.65198e-06	0.00518965	43	21	246	931	542	1049	1	10	1	0	0
ENSMUSG00000029436.10	Mmp17	-0.881766	6.96867	20.2596	0.000467788	0.033369	1192	734	997	1716	1715	1031	1630	2233	1291	1577	2299
ENSMUSG00000029561.18	Oasl2	5.39104	6.78799	29.6188	7.90938e-05	0.0128481	273	84	558	7539	4125	7783	26	111	8	31	118
ENSMUSG00000029605.17	Oas1b	4.91497	3.57071	31.1205	6.17291e-05	0.0113489	35	11	83	971	509	543	2	16	2	6	14
ENSMUSG00000029771.13	Irf5	1.37145	2.67494	18.9442	0.00062511	0.0389962	62	52	105	186	119	222	25	80	17	35	33
ENSMUSG00000029798.12	Herc6	4.24165	5.15644	29.6591	7.85613e-05	0.0128481	111	49	203	3543	1344	1369	22	44	26	45	43
ENSMUSG00000029826.15	Zc3hav1	3.30135	4.77895	26.2436	0.000142807	0.0174914	96	64	235	1858	1118	1271	26	71	19	61	98
ENSMUSG00000030048.6	Gkn3	-3.5287	0.141277	32.5002	4.95201e-05	0.0102315	6	2	2	1	1	0	11	38	14	25	20
ENSMUSG00000030107.11	Usp18	5.70309	5.61609	60.4684	1.6078e-06	0.00389231	235	85	615	3442	2200	2221	11	40	9	22	13
ENSMUSG00000030142.11	Clec4e	7.41295	0.164532	25.5694	0.000441667	0.0322075	3	2	23	18	19	85	0	0	0	0	0
ENSMUSG00000030144.5	Clec4d	4.17614	-1.13914	22.3784	0.000300288	0.0261962	1	2	11	8	11	9	0	0	0	1	0
ENSMUSG00000030149.16	Klrk1	6.52847	-0.542465	23.6083	0.000596442	0.0387014	2	2	7	14	10	47	0	0	0	0	0
ENSMUSG00000030156.6	Cd69	5.47585	0.422948	46.3225	7.42391e-06	0.00514302	7	7	22	50	53	47	0	0	0	2	0
ENSMUSG00000030157.6	Clec2d	1.21703	3.14022	22.6134	0.000286366	0.0256466	108	65	118	376	214	160	44	77	32	71	51
ENSMUSG00000030560.18	Ctsc	1.74655	3.52935	21.0185	0.00039783	0.0304409	93	39	166	467	373	412	48	79	34	53	58
ENSMUSG00000030605.16	Mfge8	-1.37457	6.99333	20.6832	0.000427151	0.0316447	1205	904	821	984	1033	591	2331	2271	1563	1630	2256
ENSMUSG00000030711.17	Sult1a1	2.04665	3.9285	43.0896	1.10843e-05	0.00543915	191	272	289	527	281	306	26	127	45	66	46
ENSMUSG00000030854.18	Ptpn5	-0.936875	7.3479	18.503	0.000690841	0.0415532	1558	1070	1144	2246	1821	1478	1963	2721	2217	1819	2850
ENSMUSG00000030909.7	Anks4b	4.72226	-1.70552	22.6639	0.000693805	0.0415824	2	1	1	6	7	5	0	0	0	0	0
ENSMUSG00000030921.18	Trim30a	5.11862	4.93878	40.1805	1.62238e-05	0.00603363	112	37	212	2372	1172	1699	8	31	9	19	22
ENSMUSG00000030966.14	Trim21	3.62435	4.14344	38.7495	1.97195e-05	0.00654187	97	50	190	1051	695	858	17	53	10	33	26
ENSMUSG00000031095.16	Cul4b	1.02907	4.08627	17.4402	0.000884304	0.0484263	205	117	215	709	382	336	102	100	72	156	152
ENSMUSG00000031431.14	Tsc22d3	0.824204	6.7415	19.0035	0.000616831	0.0389962	1491	1161	1786	2680	2003	1734	605	1238	422	1019	954
ENSMUSG00000031465.7	Angpt2	1.74751	1.75747	17.357	0.000901906	0.0489482	22	23	32	133	100	121	7	15	9	28	18
ENSMUSG00000031504.7	Rab20	1.63194	1.70256	17.5054	0.000870803	0.0481477	20	30	46	75	55	159	13	22	10	17	16
ENSMUSG00000031639.13	Tlr3	2.46523	4.86981	25.49	0.000164088	0.0184925	198	82	304	2009	923	1089	80	122	52	112	93
ENSMUSG00000031790.9	Mmp15	-1.23282	4.38298	18.6113	0.000674003	0.0409162	143	122	104	235	256	199	408	269	221	164	556
ENSMUSG00000032372.15	Plscr2	2.79369	2.80255	38.2182	2.12303e-05	0.00666461	55	36	81	482	230	191	17	28	11	18	12
ENSMUSG00000032487.9	Ptgs2	1.93895	2.9453	22.5411	0.000290565	0.0259241	71	22	135	362	239	222	22	29	25	45	37
ENSMUSG00000032508.9	Myd88	1.8987	3.90595	21.3463	0.000371364	0.0297884	108	57	155	791	520	502	57	91	39	53	90
ENSMUSG00000032556.12	Bfsp2	-1.61947	2.78314	24.5139	0.000197256	0.0205915	46	46	33	57	47	42	145	108	103	106	74
ENSMUSG00000032596.15	Uba7	3.54477	4.71911	24.0796	0.000214426	0.0214919	67	43	202	1453	940	1760	28	56	19	39	79
ENSMUSG00000032661.10	Oas3	5.62844	2.40457	17.752	0.000821786	0.0469709	4	0	6	292	218	409	1	5	0	1	3
ENSMUSG00000032690.17	Oas2	5.40078	3.94621	23.953	0.000219748	0.0216237	17	7	41	1333	716	775	3	16	2	5	11
ENSMUSG00000032744.5	Heyl	-1.20522	3.24739	20.1293	0.000481161	0.0338306	52	75	66	84	83	103	149	128	90	107	273
ENSMUSG00000033355.7	Rtp4	3.75502	4.26173	59.7989	1.71662e-06	0.00389231	143	65	296	1068	629	932	21	44	16	21	33
ENSMUSG00000033538.14	Casp4	3.96939	1.36108	31.211	6.08308e-05	0.011282	8	9	36	145	57	140	1	7	2	3	1
ENSMUSG00000033576.13	Apol6	3.37755	0.795516	19.0346	0.000612542	0.0389962	4	3	11	86	45	104	3	2	2	2	4
ENSMUSG00000033880.12	Lgals3bp	3.29147	6.84578	25.4489	0.00016535	0.018546	485	243	928	5765	3328	8381	169	309	113	148	400
ENSMUSG00000034422.15	Parp14	5.15506	5.59781	35.2932	3.23339e-05	0.00821335	133	56	363	3640	2396	2270	14	65	5	24	37
ENSMUSG00000034459.9	Ifit1	5.33149	6.64848	77.3138	3.67028e-07	0.00284823	563	315	1352	6732	3839	4900	44	83	30	51	35
ENSMUSG00000034533.11	Scn10a	2.45327	0.0401574	28.2494	9.99294e-05	0.0146067	13	8	17	32	22	24	1	5	0	3	5
ENSMUSG00000034842.17	Art3	1.2112	1.71165	19.8885	0.000507039	0.0347174	34	36	36	102	61	90	13	23	14	27	21
ENSMUSG00000034855.14	Cxcl10	7.97961	7.23344	45.8355	7.87479e-06	0.00518965	430	220	1703	10274	5373	9665	5	55	0	1	5
ENSMUSG00000035042.3	Ccl5	5.59274	3.53032	31.403	5.89728e-05	0.011282	20	14	156	404	276	1090	6	9	0	6	2
ENSMUSG00000035186.7	Ubd	5.72774	0.0184253	20.3901	0.000454811	0.0326604	0	1	11	31	24	71	0	1	0	0	0
ENSMUSG00000035208.17	Slfn8	6.35844	4.3359	36.3169	2.78281e-05	0.00762166	51	11	112	1787	831	1015	3	9	0	4	9
ENSMUSG00000035352.4	Ccl12	6.78774	3.97616	186.246	1.26737e-09	2.98515e-05	181	143	382	937	594	310	0	6	1	3	4
ENSMUSG00000035373.3	Ccl7	6.44404	2.38077	56.3508	2.42903e-06	0.00392322	16	20	78	279	131	344	1	1	2	1	0
ENSMUSG00000035385.6	Ccl2	7.3567	4.22207	52.5704	3.62719e-06	0.00426782	70	46	197	935	463	1573	1	9	1	0	0
ENSMUSG00000035413.9	Tmem98	-1.17963	3.8446	19.3523	0.000570607	0.0375917	138	105	120	109	99	110	230	262	150	223	227
ENSMUSG00000035692.8	Isg15	5.42493	5.79847	52.133	3.80505e-06	0.00426782	228	91	755	3211	1931	3592	14	60	11	27	21
ENSMUSG00000035929.12	H2-Q4	4.54381	6.15118	31.2603	6.03471e-05	0.011282	203	119	497	3189	1650	6724	42	116	25	54	73
ENSMUSG00000036202.17	Rif1	1.19165	4.1482	17.4253	0.000887422	0.0484263	139	151	256	828	456	309	92	87	84	129	163
ENSMUSG00000036249.17	Rbm43	1.57543	4.58266	21.1088	0.000390327	0.0303006	222	128	306	1128	706	682	78	221	61	177	110
ENSMUSG00000036334.13	Igsf10	1.52841	3.09935	19.5709	0.000543657	0.0367968	62	58	83	373	237	295	36	61	20	61	54
ENSMUSG00000036777.9	Anln	1.06998	5.13221	24.1666	0.000210854	0.0213153	504	340	459	1124	631	848	133	322	135	370	263
ENSMUSG00000037010.8	Apln	-1.41539	4.92456	27.0954	0.000122447	0.0161123	270	228	159	250	200	196	532	545	365	433	551
ENSMUSG00000037095.9	Lrg1	2.2969	2.23519	28.6741	9.28627e-05	0.0140211	24	35	69	145	106	257	12	20	11	18	17
ENSMUSG00000037202.7	Prf1	4.99407	-0.566135	20.7408	0.000421944	0.0316447	1	2	5	10	17	44	0	1	0	0	0
ENSMUSG00000037321.18	Tap1	4.56016	5.93492	42.1412	1.25222e-05	0.00573239	190	140	729	3021	1802	4662	28	72	34	39	86
ENSMUSG00000037405.9	Icam1	3.5088	4.05675	24.5054	0.000197575	0.0205915	40	43	163	649	532	1282	34	36	7	24	37
ENSMUSG00000037731.6	Themis2	2.89555	1.97322	22.3904	0.000299563	0.0261962	15	13	41	173	113	232	5	16	2	8	17
ENSMUSG00000037849.9	Ifi206	8.29718	2.3316	35.5288	3.12271e-05	0.00808268	8	2	32	361	171	324	0	1	0	0	0
ENSMUSG00000037921.16	Ddx60	5.69519	3.56243	32.6791	4.8149e-05	0.0100363	28	7	66	1088	426	589	1	5	3	6	7
ENSMUSG00000037944.9	Ccr7	2.77683	-0.271964	21.0158	0.000398055	0.0304409	7	3	6	29	26	25	2	2	0	3	1
ENSMUSG00000038037.6	Socs1	2.25428	2.85134	27.0429	0.000123602	0.016174	41	34	128	296	189	321	27	26	22	21	23
ENSMUSG00000038059.8	Smim3	1.30833	3.73086	28.1834	0.000101082	0.0146067	189	147	168	338	189	475	68	112	43	94	84
ENSMUSG00000038067.3	Csf3	5.64481	-0.061588	47.2219	6.66637e-06	0.00510272	5	4	12	36	41	28	0	0	0	0	1
ENSMUSG00000038086.5	Hspb2	-2.15886	-0.53647	17.5681	0.000858019	0.0480019	2	5	1	1	3	4	9	13	9	11	9
ENSMUSG00000038179.14	Slamf7	6.63949	1.47749	24.7335	0.000189173	0.0202535	3	1	27	81	59	274	0	1	1	0	0
ENSMUSG00000038393.15	Txnip	1.52882	5.23672	25.04	0.000178517	0.0196486	293	387	622	1041	551	1720	137	263	130	200	306
ENSMUSG00000038507.7	Parp12	3.05574	5.53103	27.1221	0.000121864	0.0161123	190	119	411	2950	1799	2200	69	139	47	98	180
ENSMUSG00000038774.10	Ascc3	1.79581	4.20748	24.6673	0.000191567	0.0204171	152	102	211	1045	522	544	57	89	69	115	85
ENSMUSG00000038805.11	Six3	-0.81947	3.22172	19.1325	0.000599252	0.0387769	81	57	72	141	113	100	119	176	90	104	168
ENSMUSG00000039232.13	Stx11	3.31176	1.39457	19.9689	0.000498224	0.0342133	8	7	32	89	65	182	3	6	7	1	4
ENSMUSG00000039236.19	Isg20	3.74498	3.29519	41.4923	1.36289e-05	0.00573239	50	33	152	530	341	479	16	16	14	9	8
ENSMUSG00000039304.12	Tnfsf10	3.52308	3.52636	21.1622	0.000385975	0.0303006	31	14	101	763	517	527	8	28	3	29	31
ENSMUSG00000039349.6	C130074G19Rik	-0.674384	5.04408	17.8737	0.000798746	0.0462252	311	231	302	474	397	383	363	588	266	446	638
ENSMUSG00000039531.9	Zup1	1.76335	3.16045	22.7238	0.000280078	0.0251792	92	48	81	480	239	278	42	47	34	40	35
ENSMUSG00000039699.15	Batf2	4.78994	1.83576	25.7761	0.000155611	0.0182351	6	5	28	161	119	262	3	1	1	5	1
ENSMUSG00000039701.12	Usp53	1.19813	3.67452	17.7685	0.000818619	0.0469709	143	77	178	453	254	407	76	59	45	103	120
ENSMUSG00000039853.19	Trim14	2.74319	0.847847	17.4756	0.000876933	0.048373	9	5	7	98	74	61	5	6	2	2	6
ENSMUSG00000039899.6	Fgl2	3.15697	2.67439	39.1099	1.87642e-05	0.00653239	37	21	95	339	210	286	9	15	8	18	13
ENSMUSG00000039997.17	Ifi203	4.03383	2.76057	23.047	0.000262557	0.0242521	14	8	36	617	237	289	5	7	7	9	9
ENSMUSG00000040026.9	Saa3	7.8655	2.61799	61.8833	1.40269e-06	0.00389231	28	15	82	330	130	461	1	1	0	0	0
ENSMUSG00000040033.17	Stat2	2.70448	6.61799	18.1189	0.000754559	0.0446527	405	209	877	5771	3415	5210	122	400	83	269	621
ENSMUSG00000040253.16	Gbp7	5.61126	5.45206	31.7954	5.53743e-05	0.0109604	68	26	215	4247	1728	2099	12	16	14	19	26
ENSMUSG00000040296.16	Ddx58	4.52142	5.82311	32.7775	4.74132e-05	0.00997117	166	73	405	4107	2604	2852	34	85	14	42	81
ENSMUSG00000040328.17	Olfr56	5.00579	0.783018	24.9099	0.000182954	0.0200432	4	3	11	97	36	114	1	2	1	0	0
ENSMUSG00000040329.15	Il7	3.67808	-0.980998	18.5636	0.000681367	0.0411511	3	3	2	20	17	7	0	2	0	0	0
ENSMUSG00000040428.20	Plekha4	3.53124	3.52708	22.958	0.000267251	0.0243992	37	22	49	829	476	567	18	25	8	12	31
ENSMUSG00000040483.16	Xaf1	3.42399	4.54522	25.9653	0.000150276	0.0179675	101	33	214	1336	744	1487	24	63	17	40	69
ENSMUSG00000040552.9	C3ar1	2.44489	2.42442	18.9003	0.000631326	0.0392355	28	26	66	172	77	390	7	26	15	17	17
ENSMUSG00000040613.15	Apobec1	2.89328	2.53997	30.0398	7.37197e-05	0.0126744	32	19	69	291	190	285	7	24	9	10	20
ENSMUSG00000040648.16	Ppip5k2	1.1654	4.1249	18.3163	0.000721025	0.0429176	227	100	224	687	408	429	80	140	43	136	198
ENSMUSG00000040809.11	Chil3	4.29155	1.95156	28.1924	0.000100924	0.0146067	14	14	99	47	91	299	0	8	3	3	4
ENSMUSG00000041827.16	Oasl1	5.94266	4.35207	53.928	3.13261e-06	0.00392322	71	39	224	1086	673	1496	4	15	3	5	6
ENSMUSG00000042388.15	Dlgap3	-1.22879	8.16194	19.4121	0.000563077	0.0374424	2308	2035	2244	2671	2649	1809	4537	4834	4300	3088	4604
ENSMUSG00000042622.15	Maff	2.66599	2.43386	32.1112	5.26591e-05	0.0106011	28	47	72	214	77	332	12	21	9	13	18
ENSMUSG00000043263.14	Ifi209	5.59649	2.45822	54.2016	3.0425e-06	0.00392322	24	16	56	388	161	299	2	2	2	3	1
ENSMUSG00000043448.14	Gjc2	-1.54734	4.8546	31.9043	5.44201e-05	0.0108628	193	182	118	276	245	214	593	424	414	318	555
ENSMUSG00000043613.9	Mmp3	5.97772	0.218024	41.7582	1.31624e-05	0.00573239	2	5	22	66	35	34	0	0	0	0	1
ENSMUSG00000043740.16	B430306N03Rik	4.51321	0.732425	33.231	4.41842e-05	0.0095388	7	7	19	88	68	56	0	2	0	0	4
ENSMUSG00000043939.17	A530064D06Rik	4.3619	-0.998368	19.2123	0.000588665	0.0385151	2	0	8	18	8	16	0	0	0	1	0
ENSMUSG00000043953.13	Ccrl2	2.43677	2.3606	25.3048	0.000169859	0.0189614	26	15	99	214	145	230	13	22	8	19	18
ENSMUSG00000044350.15	Lacc1	1.65073	2.58765	21.137	0.000388018	0.0303006	48	32	75	233	153	234	20	44	14	40	33
ENSMUSG00000044583.14	Tlr7	2.09361	2.03109	27.6898	0.000110199	0.0151791	47	28	65	157	79	154	13	16	19	14	8
ENSMUSG00000044701.6	Il27	5.14881	-0.44534	26.1462	0.000145371	0.0176498	2	1	8	21	19	39	0	1	0	0	0
ENSMUSG00000044703.6	Phf11a	5.87547	0.792699	30.7564	6.55011e-05	0.0116523	2	3	25	93	45	97	0	1	1	0	0
ENSMUSG00000044827.11	Tlr1	2.35264	0.675399	30.6216	6.69644e-05	0.0117428	12	14	26	66	38	41	2	5	4	9	3
ENSMUSG00000045328.12	Cenpe	3.07758	0.620187	17.977	0.000779786	0.045486	2	6	13	103	41	55	3	1	1	4	5
ENSMUSG00000045502.7	Hcar2	6.61093	1.41431	44.2629	9.55867e-06	0.00530437	13	6	28	119	70	189	0	2	0	0	0
ENSMUSG00000045868.13	Gvin1	4.01719	3.4318	28.1842	0.000101068	0.0146067	29	40	183	841	272	469	17	19	9	0	16
ENSMUSG00000045932.13	Ifit2	5.89054	7.01416	38.9757	1.91137e-05	0.00653239	345	76	933	10532	4406	7980	20	68	16	58	68
ENSMUSG00000046169.11	Adamts6	2.46147	3.34811	17.65	0.000841662	0.0476551	46	26	80	811	336	329	19	43	11	42	52
ENSMUSG00000046223.11	Plaur	3.10679	1.74803	33.7868	4.05629e-05	0.00921243	17	21	56	117	59	209	3	11	6	7	6
ENSMUSG00000046245.14	Pilra	2.15702	-0.446918	18.7129	0.00065864	0.0402557	9	3	12	13	9	27	2	2	2	2	2
ENSMUSG00000046417.15	Lrrc75a	-1.03305	3.42705	17.575	0.000856632	0.0480019	99	94	70	108	93	90	160	200	111	148	170
ENSMUSG00000046688.15	Tifa	1.84528	4.04963	25.1155	0.000176	0.0194624	135	91	271	723	413	607	38	136	49	98	56
ENSMUSG00000046718.9	Bst2	3.91314	5.3666	39.7771	1.71321e-05	0.00620813	214	105	449	2145	1313	2724	30	102	38	48	44
ENSMUSG00000046805.11	Mpeg1	2.23297	5.45313	17.8568	0.000801897	0.0462938	266	138	373	1974	1126	2688	75	252	77	230	198
ENSMUSG00000046879.8	Irgm1	4.3558	6.46017	43.7712	1.01669e-05	0.00534278	541	212	1205	4533	2562	5905	38	190	26	119	73
ENSMUSG00000047216.9	Cdh19	1.53044	2.40859	17.5336	0.000865022	0.0480019	46	46	44	298	132	116	21	19	19	31	48
ENSMUSG00000047735.15	Samd9l	4.58715	5.07189	35.2733	3.24294e-05	0.00821335	102	62	268	3767	990	1166	21	33	26	22	28
ENSMUSG00000048249.15	Crebrf	1.03546	5.46323	21.0929	0.000391635	0.0303006	468	285	633	1647	1113	972	275	317	193	329	409
ENSMUSG00000048572.6	Tmem252	2.55717	2.98634	31.3697	5.92904e-05	0.011282	61	35	133	268	187	448	15	30	7	30	40
ENSMUSG00000048806.5	Ifnb1	7.14882	-0.0559864	35.9881	0.000113909	0.0155087	3	3	30	50	27	14	0	0	0	0	0
ENSMUSG00000048852.14	Gm12185	4.99924	1.69722	24.8645	0.000184531	0.0200501	3	3	24	232	116	171	1	4	0	2	2
ENSMUSG00000049130.7	C5ar1	2.847	0.992181	34.4172	3.68585e-05	0.00877505	18	9	29	78	47	87	3	3	2	9	5
ENSMUSG00000049409.10	Prokr1	4.78301	-0.135634	21.4372	0.000364386	0.0297884	4	1	5	79	11	29	0	1	0	1	0
ENSMUSG00000049502.18	Dtx3l	3.97773	4.8703	26.9046	0.000126704	0.01642	104	37	207	1944	1330	1501	17	56	9	34	77
ENSMUSG00000049521.3	Cdc42ep1	-0.978013	5.21929	19.5134	0.000550604	0.0370793	231	241	273	482	310	600	604	536	357	452	785
ENSMUSG00000049556.6	Lingo1	-0.782169	7.36255	17.412	0.000890235	0.0484263	1716	951	1505	2004	1840	1978	1962	3003	1480	2061	3279
ENSMUSG00000049734.10	Trex1	1.66084	4.02198	24.5137	0.000197262	0.0205915	116	105	194	654	412	669	51	113	45	97	110
ENSMUSG00000050014.9	Apol10b	4.17147	1.25724	29.125	8.59759e-05	0.0134111	8	3	24	169	98	78	1	3	2	3	2
ENSMUSG00000050370.6	Ch25h	5.2395	2.59622	44.9426	8.78507e-06	0.00518965	26	11	111	364	220	279	0	6	3	1	5
ENSMUSG00000050578.11	Mmp13	5.54068	-0.12473	20.6257	0.000432423	0.0318291	0	3	4	71	34	18	0	0	0	0	1
ENSMUSG00000051262.10	Nat8f3	-1.24364	2.40066	26.4446	0.000137675	0.016978	42	24	22	55	54	67	64	103	56	77	114
ENSMUSG00000051439.8	Cd14	1.57399	2.56448	18.3131	0.000721548	0.0429176	44	51	81	205	104	246	21	48	21	41	18
ENSMUSG00000051652.5	Lrrc3	-0.862951	3.15773	17.7632	0.000819622	0.0469709	67	73	73	103	94	99	92	150	97	121	175
ENSMUSG00000052270.8	Fpr2	3.19758	-0.477566	21.0841	0.000392361	0.0303006	2	6	13	26	9	24	1	0	0	2	2
ENSMUSG00000052305.7	Hbb-bs	-2.07727	7.55163	19.1802	0.000592905	0.0385781	1016	1011	899	286	1646	678	3456	3011	4094	2580	2491
ENSMUSG00000052749.10	Trim30b	5.49335	0.834456	21.0631	0.000394103	0.0303356	4	0	13	134	51	85	0	0	0	0	3
ENSMUSG00000052760.17	A630001G21Rik	2.84812	-0.494428	19.1043	0.000603047	0.0388092	5	2	7	20	19	25	0	1	2	2	1
ENSMUSG00000052776.11	Oas1a	4.97744	4.4171	42.1797	1.24599e-05	0.00573239	79	31	229	1277	790	1345	11	28	5	13	10
ENSMUSG00000053101.4	Gpr141	3.89929	-0.835857	24.7999	0.000186803	0.0201833	5	1	11	8	15	17	0	0	0	1	1
ENSMUSG00000053113.4	Socs3	2.9432	4.2002	25.8178	0.000154415	0.0181855	90	73	212	613	342	1495	42	60	26	47	36
ENSMUSG00000053175.18	Bcl3	4.10034	1.85299	26.2238	0.000143323	0.0174914	9	12	27	166	113	246	1	5	6	1	5
ENSMUSG00000053318.8	Slamf8	3.52432	1.05531	27.7193	0.000109628	0.0151791	7	5	40	95	62	91	1	3	1	7	3
ENSMUSG00000053338.10	Tarm1	4.03234	-1.23874	21.385	0.000368375	0.0297884	4	2	2	5	8	17	0	1	0	0	0
ENSMUSG00000054072.13	Iigp1	6.7251	6.08402	43.3957	1.06611e-05	0.00534278	144	59	482	6134	2204	3917	9	28	2	19	8
ENSMUSG00000054203.8	Ifi205	6.35962	2.43867	41.5724	1.34864e-05	0.00573239	19	14	85	395	124	298	0	6	0	0	0
ENSMUSG00000054404.14	Slfn5	3.31169	4.21784	21.3662	0.000369826	0.0297884	71	27	137	1288	715	925	12	58	10	50	56
ENSMUSG00000054545.18	Ugt1a6a	1.42753	2.04548	27.7768	0.000108525	0.0151791	47	30	71	148	74	113	19	36	11	22	27
ENSMUSG00000055172.11	C1ra	3.36263	3.8919	21.3463	0.000371365	0.0297884	59	19	101	808	415	1074	16	41	8	34	41
ENSMUSG00000055413.13	H2-Q5	3.59868	1.53589	21.3242	0.000373082	0.0297884	6	10	21	96	80	225	2	8	1	7	3
ENSMUSG00000055866.10	Per2	1.74939	4.80253	18.7451	0.000653855	0.0402557	210	154	274	1693	744	870	84	199	58	98	277
ENSMUSG00000055945.9	Prr18	-1.06957	6.16798	26.0695	0.000147427	0.0178077	598	529	471	779	762	654	1113	1079	805	926	1425
ENSMUSG00000056116.19	H2-T22	1.84338	6.52416	21.7749	0.000339745	0.0288541	583	495	1147	3954	2456	4184	319	559	360	433	335
ENSMUSG00000056144.15	Trim34a	3.64969	3.74341	26.806	0.000128967	0.01642	48	23	102	1083	513	563	13	33	6	28	23
ENSMUSG00000056162.15	Cndp1	1.66371	-0.336191	17.2693	0.000920885	0.049635	8	8	10	20	12	18	1	6	1	4	4
ENSMUSG00000056290.17	Ms4a4b	6.36921	0.574533	18.7377	0.000654943	0.0402557	1	1	7	23	28	158	0	0	0	1	0
ENSMUSG00000057135.13	Scimp	5.36953	-0.274737	34.1384	3.84471e-05	0.008964	4	1	15	38	17	31	0	1	0	0	0
ENSMUSG00000057137.10	Tmem140	2.57757	3.16097	28.9318	8.88532e-05	0.0137372	51	33	129	373	239	497	19	34	11	33	36
ENSMUSG00000057143.16	Trim12c	2.75937	2.52704	18.1084	0.000756407	0.0446527	28	16	34	441	205	197	19	14	8	5	27
ENSMUSG00000057191.14	AB124611	2.99141	0.846194	23.5196	0.000239145	0.0226217	10	14	29	53	30	99	1	1	5	7	3
ENSMUSG00000057346.13	Apol9a	4.5681	2.84322	33.3542	4.33507e-05	0.0095388	29	21	34	338	192	592	2	12	3	5	7
ENSMUSG00000057596.14	Trim30d	4.78209	3.8113	34.4129	3.68825e-05	0.00877505	50	21	61	1081	610	708	8	15	4	8	15
ENSMUSG00000058163.15	Gm5431	6.24581	1.09775	40.6953	1.51436e-05	0.00603363	7	3	27	140	69	97	0	1	0	1	0
ENSMUSG00000058620.6	Adra2b	-1.44405	1.03491	21.7479	0.000341639	0.0288541	17	4	10	26	20	14	22	41	19	38	43
ENSMUSG00000059089.5	Fcgr4	4.72871	2.19284	38.2887	2.10224e-05	0.00666461	16	18	64	187	126	319	4	8	0	1	3
ENSMUSG00000060183.7	Cxcl11	6.32273	1.65028	69.1883	7.20637e-07	0.00284823	17	14	52	192	106	123	1	0	1	1	0
ENSMUSG00000060519.12	Tor3a	3.1711	5.75939	38.2108	2.12521e-05	0.00666461	286	178	600	3378	2144	2329	86	161	66	98	151
ENSMUSG00000060550.17	H2-Q7	4.58262	4.68607	26.5172	0.000135873	0.016844	50	33	172	929	616	2624	18	31	15	13	26
ENSMUSG00000060787.10	Olfr464	-2.90833	-1.11797	17.4173	0.000889115	0.0484263	2	0	0	1	2	1	1	14	5	10	4
ENSMUSG00000060794.9	Tssk5	1.99787	-0.303545	24.3742	0.0002026	0.0208386	8	11	10	24	10	18	2	2	2	2	5
ENSMUSG00000060802.9	B2m	2.48664	7.39349	24.4781	0.000198607	0.0206079	920	910	1713	6125	3215	12313	466	710	287	628	540
ENSMUSG00000061186.16	Sfmbt2	1.38709	2.40951	17.416	0.000889384	0.0484263	48	35	44	181	164	175	20	46	19	29	38
ENSMUSG00000061232.17	H2-K1	2.6074	7.54849	21.3346	0.000372272	0.0297884	860	827	1913	5929	3596	15267	529	677	408	482	526
ENSMUSG00000061353.12	Cxcl12	-0.848561	5.46388	20.4903	0.000445134	0.0322606	354	268	357	726	561	426	547	726	324	554	1145
ENSMUSG00000062488.10	Ifit3b	5.65824	6.38939	38.0523	2.17286e-05	0.00666461	272	89	481	7162	3724	4008	14	69	5	37	56
ENSMUSG00000063234.6	Gpr84	3.18632	1.92101	49.6609	5.01834e-06	0.00486389	26	33	67	149	93	172	4	15	3	3	13
ENSMUSG00000063268.13	Parp10	3.32858	4.65034	29.6837	7.82373e-05	0.0128481	108	57	258	1229	830	1627	29	55	41	42	59
ENSMUSG00000063286.8	Gvin-ps7	4.97166	2.14023	25.5251	0.000163023	0.0184608	19	4	26	408	135	188	1	0	0	5	7
ENSMUSG00000063388.6	BC023105	8.80081	1.41055	22.9845	0.000658757	0.0402557	2	2	10	227	94	128	0	0	0	0	0
ENSMUSG00000063796.10	Slc22a8	-1.10655	3.41879	21.7059	0.000344622	0.0288541	88	76	68	122	111	87	136	189	71	145	318
ENSMUSG00000064220.7	H2ac18	-1.25579	2.59292	17.4618	0.000879811	0.0484184	45	37	47	48	55	52	71	88	94	123	65
ENSMUSG00000066258.14	Trim12a	2.80219	2.74495	20.5449	0.000439951	0.032182	29	19	41	362	190	408	12	29	7	19	19
ENSMUSG00000066363.13	Serpina3f	7.03475	1.82954	46.8933	6.93245e-06	0.00510272	8	8	62	121	126	242	1	1	0	0	0
ENSMUSG00000066677.13	Ifi208	5.84897	1.76686	29.3189	8.3195e-05	0.0132404	7	2	30	236	98	207	0	3	1	0	1
ENSMUSG00000066861.15	Oas1g	5.94673	3.13475	34.6084	3.58124e-05	0.00877505	18	11	91	523	301	599	0	6	1	0	7
ENSMUSG00000067203.9	H2-K2	1.53666	2.74768	30.5908	6.73038e-05	0.0117428	51	63	95	233	164	216	23	52	22	41	40
ENSMUSG00000067212.9	H2-T23	3.34066	6.26321	27.5604	0.000112741	0.015439	309	172	752	3613	2235	5597	79	222	75	188	163
ENSMUSG00000068129.6	Cst7	4.15033	0.700872	26.6966	0.000131536	0.0165679	3	6	18	60	32	114	1	2	2	1	1
ENSMUSG00000068245.15	Phf11d	5.83064	3.89712	41.1446	1.42673e-05	0.00579401	49	19	182	1012	522	871	4	12	3	6	0
ENSMUSG00000068246.7	Apol9b	4.17336	2.47502	30.729	6.57958e-05	0.0116523	17	17	44	243	144	440	5	11	3	6	3
ENSMUSG00000068606.7	Gm4841	6.02204	2.12088	17.9026	0.000793396	0.0460287	2	0	16	254	145	341	0	6	0	0	0
ENSMUSG00000069793.13	Slfn9	6.15752	3.46943	28.442	9.66509e-05	0.0145001	14	4	51	1102	463	468	1	8	1	3	2
ENSMUSG00000069874.8	Irgm2	4.07848	5.33357	45.0282	8.69276e-06	0.00518965	172	95	474	2476	1768	1935	37	59	23	46	68
ENSMUSG00000069917.8	Hba-a2	-2.45846	6.98355	24.455	0.00019949	0.0206088	411	491	492	165	1105	483	3907	2079	2196	1181	1782
ENSMUSG00000069919.8	Hba-a1	-2.38816	6.45806	24.3144	0.000204938	0.0209874	304	395	414	158	706	247	2542	1526	1622	791	1167
ENSMUSG00000070031.12	Sp140	2.73757	1.52173	22.8743	0.000271754	0.0247139	22	10	46	124	73	129	2	19	1	10	6
ENSMUSG00000070034.14	Sp110	3.71083	2.25513	21.9367	0.000328613	0.0283522	10	12	43	278	169	266	5	9	0	4	17
ENSMUSG00000070327.15	Rnf213	4.82796	7.49787	29.6919	7.81293e-05	0.0128481	453	162	1202	14458	9442	7624	60	233	31	115	256
ENSMUSG00000070369.14	Itgad	2.61914	0.191391	18.8116	0.000644083	0.0398298	12	27	17	17	14	33	3	4	3	3	0
ENSMUSG00000071068.8	Treml2	3.98042	0.979466	20.6994	0.00042568	0.0316447	4	9	18	82	54	125	0	1	0	1	9
ENSMUSG00000071350.13	Setdb2	1.92708	2.61063	24.2571	0.000207208	0.021128	62	24	88	270	150	229	14	39	11	39	30
ENSMUSG00000071537.7	Klrg2	2.70825	0.646528	21.2432	0.000379467	0.0299932	7	6	19	62	44	68	4	2	5	3	3
ENSMUSG00000071637.6	Cebpd	1.65172	4.33268	18.08	0.000761395	0.044723	121	229	409	531	341	829	80	114	112	100	56
ENSMUSG00000071714.8	Csf2rb2	3.77184	1.17043	23.3941	0.000245119	0.0229108	11	4	17	89	57	159	1	1	1	5	6
ENSMUSG00000072109.12	A530040E14Rik	4.64958	-0.818806	19.4974	0.000552553	0.0370793	1	0	14	20	13	14	0	1	0	0	0
ENSMUSG00000072620.4	Slfn2	3.18781	3.7925	44.5483	9.2248e-06	0.00529953	103	72	250	532	353	788	13	51	25	29	18
ENSMUSG00000073409.13	H2-Q6	4.79427	4.64866	37.5801	2.32222e-05	0.00692374	72	85	216	932	512	2445	17	27	4	21	21
ENSMUSG00000073411.13	H2-D1	2.19961	7.52574	20.5898	0.000435747	0.0319738	961	987	2141	5616	3607	13178	519	935	368	785	883
ENSMUSG00000073418.5	C4b	3.04122	6.91088	17.9845	0.000778428	0.045486	342	239	615	6565	3914	8416	239	317	163	142	504
ENSMUSG00000073489.7	Ifi204	6.25108	3.67677	55.0892	2.76992e-06	0.00392322	63	32	205	814	320	793	1	10	3	2	0
ENSMUSG00000073490.12	Ifi207	5.88319	2.19423	31.0781	6.21556e-05	0.0113489	12	4	27	316	141	299	0	4	0	2	1
ENSMUSG00000073491.12	Ifi213	5.77324	2.08561	23.8819	0.000222804	0.0217713	9	2	18	366	156	207	0	6	0	1	0
ENSMUSG00000073555.2	Gm4951	6.27316	3.20769	25.5738	0.000161551	0.0184237	7	4	35	932	348	427	1	5	2	3	0
ENSMUSG00000073940.4	Hbb-bt	-2.72062	5.2314	26.8429	0.000128116	0.01642	132	160	100	47	247	87	911	518	949	427	469
ENSMUSG00000074151.14	Nlrc5	5.55873	5.27735	32.7933	4.72964e-05	0.00997117	68	30	210	2835	1659	2371	9	39	6	13	18
ENSMUSG00000074604.10	Mgst2	2.79246	-1.22293	18.4985	0.000691553	0.0415532	2	3	3	9	7	13	0	1	0	1	1
ENSMUSG00000074874.11	Ctla2b	3.51452	-0.38289	21.8855	0.000332089	0.0285476	11	5	11	25	11	23	0	0	3	1	0
ENSMUSG00000074896.4	Ifit3	5.4652	7.96056	53.9051	3.14028e-06	0.00392322	1470	539	2647	17891	9837	12484	34	293	42	134	105
ENSMUSG00000075010.6	AW112010	2.54782	2.97803	24.7599	0.000188227	0.0202442	35	51	175	394	160	318	20	22	24	32	8
ENSMUSG00000075602.11	Ly6a	1.74729	5.52413	23.2405	0.000252666	0.0235229	382	297	711	1539	976	2158	107	373	142	307	191
ENSMUSG00000078606.9	Gvin2	2.98636	3.21912	21.4824	0.000360974	0.0297884	29	41	77	753	410	221	17	9	9	36	34
ENSMUSG00000078616.3	Trim30c	6.81325	-0.304617	23.8818	0.000571361	0.0375917	2	1	4	47	30	25	0	0	0	0	0
ENSMUSG00000078746.3	Fam205a4	-1.41987	0.0113083	17.7426	0.000823595	0.0469709	6	3	4	9	10	9	13	21	11	14	12
ENSMUSG00000078763.3	Slfn1	5.87659	1.21219	20.0355	0.000491056	0.0340186	1	1	11	73	57	224	0	1	1	0	1
ENSMUSG00000078853.9	Igtp	4.64302	6.52441	46.9019	6.92531e-06	0.00510272	355	174	1142	4994	3342	5983	54	115	39	85	70
ENSMUSG00000078920.4	Ifi47	4.85976	4.46183	46.9593	6.87807e-06	0.00510272	79	43	328	1396	861	1129	7	28	4	21	17
ENSMUSG00000078921.4	Tgtp2	5.39599	5.23764	51.2486	4.19597e-06	0.0043453	121	116	573	2392	1313	2113	4	33	3	33	21
ENSMUSG00000078922.10	Tgtp1	4.92331	5.39874	41.8333	1.3034e-05	0.00573239	124	100	573	2451	1430	2688	20	57	12	39	9
ENSMUSG00000078945.11	Naip2	2.32535	1.38276	28.0653	0.000103182	0.0148192	26	15	31	81	57	130	3	9	7	12	10
ENSMUSG00000078954.10	Arhgap8	3.71754	-0.0269897	18.8103	0.000644272	0.0398298	1	2	10	50	26	41	1	0	1	2	1
ENSMUSG00000079014.5	Serpina3i	5.71735	0.0255502	18.7057	0.000659706	0.0402557	1	1	6	26	13	92	0	0	0	1	0
ENSMUSG00000079017.4	Ifi27l2a	2.95628	3.92918	39.0333	1.89629e-05	0.00653239	108	68	257	553	357	946	21	57	28	39	29
ENSMUSG00000079227.11	Ccr5	1.15269	2.66682	19.0646	0.00060843	0.0389962	67	47	98	173	118	208	31	54	31	45	38
ENSMUSG00000079339.8	Ifit1bl1	1.70615	2.69724	29.4094	8.19333e-05	0.0131283	78	61	126	188	124	202	17	51	25	41	18
ENSMUSG00000079362.6	Gm43302	6.95034	3.11385	21.8113	0.000337201	0.0287769	0	10	30	668	432	451	6	0	0	0	0
ENSMUSG00000079363.8	Gbp4	5.06853	4.95514	34.0751	3.88184e-05	0.008964	52	42	413	1567	975	2367	10	33	3	29	20
ENSMUSG00000079419.5	Ms4a6c	4.67255	2.36191	53.8327	3.16469e-06	0.00392322	31	24	96	232	155	272	1	4	3	9	1
ENSMUSG00000079484.13	Phyhd1	1.26793	4.46088	28.2585	9.97715e-05	0.0146067	170	274	359	791	398	566	87	166	111	123	186
ENSMUSG00000081683.6	Fzd10	-1.99432	1.40785	19.4384	0.000559808	0.0373893	16	23	10	8	11	8	51	48	34	44	48
ENSMUSG00000082195.4	Gm13034	1.94652	-0.0538914	18.3726	0.000711765	0.0425505	12	7	8	39	25	14	2	2	3	6	3
ENSMUSG00000082292.4	Gm12250	6.47828	3.54879	42.8883	1.1373e-05	0.00546695	34	21	136	613	370	871	0	10	0	1	2
ENSMUSG00000084347.4	Akt2-ps	-0.920495	3.16769	19.0189	0.00061471	0.0389962	68	68	69	119	88	96	110	161	112	109	139
ENSMUSG00000084846.2	A730011C13Rik	2.72548	2.4208	19.1058	0.000602851	0.0388092	23	21	40	357	190	203	4	24	5	8	35
ENSMUSG00000089929.2	Bcl2a1b	3.22532	1.59217	28.8655	8.98653e-05	0.0137372	27	17	59	93	48	177	6	10	0	9	3
ENSMUSG00000090071.5	Cdk5r2	-1.04215	7.60197	24.176	0.000210471	0.0213153	1659	1249	1526	2133	2005	1885	3095	3181	2208	2213	3613
ENSMUSG00000090231.11	Cfb	5.631	3.58017	36.1631	2.8457e-05	0.00770431	25	19	120	659	327	949	1	6	3	1	13
ENSMUSG00000090272.10	Mndal	3.65686	1.91017	21.3312	0.00037254	0.0297884	10	4	28	274	118	185	7	4	2	4	9
ENSMUSG00000091144.3	Phf11c	3.34046	0.589554	17.7003	0.00083178	0.0473231	5	4	9	91	57	51	0	4	0	5	3
ENSMUSG00000091191.4	Gm17334	2.77165	1.22322	21.0917	0.000391739	0.0303006	9	11	19	97	59	135	4	11	1	5	8
ENSMUSG00000091549.2	Gm6548	2.75779	3.68541	21.7243	0.000343312	0.0288541	47	44	87	903	440	565	26	54	16	44	30
ENSMUSG00000091556.9	Gm14569	2.31891	0.392304	19.7398	0.00052382	0.0356591	8	14	17	57	43	19	4	8	0	3	5
ENSMUSG00000091649.4	Phf11b	5.52589	2.62069	62.0124	1.38551e-06	0.00389231	28	17	117	348	168	343	1	3	3	3	2
ENSMUSG00000092021.9	Gbp11	3.90434	2.26172	22.4596	0.00029539	0.0261565	20	2	42	324	123	289	6	9	4	6	3
ENSMUSG00000093938.3	Evi2b	2.69322	0.519964	17.6336	0.000844901	0.0477237	6	2	14	70	44	57	2	4	2	2	7
ENSMUSG00000094796.3	BC147527	3.25791	-0.175316	20.0369	0.000490914	0.0340186	4	4	13	31	28	26	0	0	3	1	2
ENSMUSG00000096727.4	Psmb9	3.46191	3.78936	44.9167	8.8132e-06	0.00518965	72	60	217	592	400	838	12	38	13	31	24
ENSMUSG00000096775.2	Gm5796	3.13529	-0.230729	18.9582	0.000623154	0.0389962	6	5	4	45	21	23	1	1	3	1	0
ENSMUSG00000097115.3	1810019N24Rik	3.23779	-1.66516	17.3059	0.000912905	0.0493178	3	1	3	8	3	4	0	0	0	1	0
ENSMUSG00000097194.3	9330175E14Rik	6.35421	2.23863	25.5671	0.000161754	0.0184237	17	0	13	411	215	196	0	2	1	0	2
ENSMUSG00000097572.3	Gm26797	4.12015	1.26554	22.0292	0.000322436	0.0280246	9	2	10	127	78	153	1	4	1	1	5
ENSMUSG00000099974.2	Bcl2a1d	5.98654	0.889898	29.967	7.4618e-05	0.0127359	8	1	29	83	25	136	1	0	0	1	0
ENSMUSG00000100490.2	Gm28455	2.57593	-0.907214	17.6553	0.000840616	0.0476551	10	1	9	12	7	10	0	2	1	1	1
ENSMUSG00000102037.2	Bcl2a1a	3.55985	0.778977	26.8848	0.000127153	0.01642	10	6	34	48	27	107	1	1	4	3	2
ENSMUSG00000104713.5	Gbp6	5.81186	6.36936	40.125	1.63455e-05	0.00603363	306	68	698	5807	3082	5198	7	74	8	31	40
ENSMUSG00000105096.2	Gbp10	6.41955	3.6964	30.733	6.57524e-05	0.0116523	21	7	70	814	406	1038	0	9	1	1	4
ENSMUSG00000105338.2	Gm43802	5.50806	0.856452	20.6823	0.000427232	0.0316447	5	0	11	143	43	92	0	3	0	0	0
ENSMUSG00000105504.5	Gbp5	5.86537	5.56325	33.7685	4.06764e-05	0.00921243	69	35	361	3251	1791	3201	5	37	3	16	26
ENSMUSG00000105572.2	Gm43300	2.68085	-0.237054	22.4108	0.000298322	0.0261962	6	4	5	26	23	34	1	2	1	1	4
ENSMUSG00000105843.2	Gm19439	1.42334	3.9544	19.4341	0.000560347	0.0373893	253	284	336	321	185	235	48	155	64	100	74
ENSMUSG00000106734.4	Gm20559	5.47598	4.15196	35.9984	2.91482e-05	0.00771308	46	18	98	1616	869	669	3	11	5	11	9
ENSMUSG00000107017.2	Gm43196	6.45379	1.27691	17.9748	0.000780179	0.045486	0	0	7	233	95	89	0	0	0	0	2
ENSMUSG00000107198.2	Gm19619	4.35519	-1.88395	26.8218	0.00036779	0.0297884	2	2	2	4	3	3	0	0	0	0	0
ENSMUSG00000107215.2	Gm43197	5.27894	1.43105	20.452	0.000448807	0.0323278	3	4	9	237	155	54	0	5	0	0	1
ENSMUSG00000108604.2	Gm44850	3.83582	-0.874461	26.7394	0.000130524	0.0165289	5	2	3	26	11	12	0	1	0	0	1
ENSMUSG00000108801.2	Gm39090	4.35614	-0.484312	29.7263	7.76812e-05	0.0128481	6	4	3	36	11	27	0	1	0	1	0
ENSMUSG00000110588.2	Gm45774	1.13532	4.11987	17.5864	0.000854332	0.0480019	164	169	255	488	242	650	91	176	84	103	111
ENSMUSG00000112023.2	Lilr4b	5.91063	2.01825	20.8124	0.000415563	0.0314732	2	2	32	113	57	462	0	3	0	1	2
ENSMUSG00000112148.2	Lilrb4a	5.66035	2.76824	26.5988	0.000133881	0.0166848	5	9	69	414	143	552	0	8	0	3	2
ENSMUSG00000113313.2	Gm32036	-2.0721	-0.891968	22.9579	0.000267257	0.0243992	1	1	3	4	3	1	7	7	5	9	9
ENSMUSG00000115338.3	Pnp	1.26122	5.21685	20.2597	0.000467779	0.033369	311	309	631	1567	895	784	172	344	172	281	156
ENSMUSG00000115902.2	D730005E14Rik	3.73364	-0.0267395	26.8187	0.000128674	0.01642	4	4	7	51	32	31	1	2	1	1	0
ENSMUSG00000116308.2	Gm49482	3.38025	-0.511879	20.6312	0.000431909	0.0318291	3	9	9	10	17	26	1	1	2	0	0
ENSMUSG00000117964.2	Gm36043	6.0065	1.88408	20.7957	0.000417043	0.0314841	1	2	11	235	167	223	0	4	0	0	1
ENSMUSG00000118633.2	Gm21104	2.62528	-0.185156	19.6357	0.000535945	0.0363794	2	11	10	33	20	24	1	4	0	3	2

## Sheet: Canonical pathways
Ingenuity Canonical Pathways	-log(p-value)	Ratio	z-score	Molecules
Pathogen Induced Cytokine Storm Signaling Pathway	31.7	0.135	6.223	C3,CCL11,CCL19,Ccl2,CCL2,CCL3L3,CCL4,CCL5,Ccl7,CCR5,CSF2RB,CXCL10,Cxcl11,CXCL12,CXCL13,CXCL16,CXCL2,Cxcl9,DDX58,DHX58,FASLG,GSDMD,IFIH1,IFNB1,IL12B,IL12RB1,IL1A,IL1B,IL1R1,IL1R2,IL1RN,IL6,IRF1,IRF7,IRF9,MLKL,MYD88,NLRC5,PRF1,SOCS3,STAT1,STX11,TLR1,TLR2,TLR3,TLR7,TNF,TNFSF10,TNFSF8,ZBP1
Role of Hypercytokinemia/hyperchemokinemia in the Pathogenesis of Influenza	30.7	0.337	5.385	CCL2,CCL4,CCL5,CXCL10,DDX58,EIF2AK2,IFIT2,IFIT3,IFNB1,IL12B,IL1A,IL1B,IL1RN,IL6,IRF7,IRF9,ISG15,ISG20,MYD88,OAS1,Oas1b,OAS2,OAS3,RSAD2,STAT1,STAT2,TLR3,TLR7,TNF
Multiple Sclerosis Signaling Pathway	15.1	0.117	5.099	C2,C3,FAS,FASLG,HLA-A,HLA-E,HLA-G,IL12B,IL1A,IL1B,IL6,IRF1,PARP10,PARP12,PARP14,PARP3,PARP9,RNF213,STAT1,TLR1,TLR2,TLR3,TLR7,TNF,TNFSF10,TNFSF8
Phagosome Formation	6.46	0.0432	4.382	ADRA2B,AKT2,C3,C3AR1,C5AR1,CCR5,CCR7,CCRL2,CD14,CLEC4D,CLEC4E,FCGR1A,FCGR2B,FCGR3A/FCGR3B,FPR2,FZD10,GPR141,GPR35,GPR65,GPR84,HCAR2,HCK,ITGAD,MSR1,MYD88,PROKR1,TLR1,TLR2,TLR3,TLR7
S100 Family Signaling Pathway	10.2	0.0505	4.323	ADRA2B,AKT2,BCL3,C3AR1,C5AR1,CCL4,CCR5,CCR7,CCRL2,CDKN1A,CYBB,ETV4,FCGR1A,FCGR2B,FCGR3A/FCGR3B,FPR2,FZD10,GPR141,GPR35,GPR65,GPR84,HCAR2,HIF1A,IFNB1,IL12B,IL1B,IL6,MAP3K8,MMP13,MMP15,MMP17,MMP3,MYD88,NCF1,PLCE1,PROKR1,SCN10A,TNF,VCAM1
Macrophage Classical Activation Signaling Pathway	20.1	0.153	4.271	ACOD1,CCL5,CD14,CD40,CXCL10,CYBB,FASLG,GBP2,GBP4,HIF1A,IFNB1,IL12B,IL1A,IL1B,IL6,IRF1,IRF5,IRF9,MYD88,NFKBIA,PARP14,PARP9,SOCS1,SOCS3,STAT1,STAT2,TNF,TNFSF10,TNFSF8
Systemic Lupus Erythematosus In B Cell Signaling Pathway	5.13	0.0386	4.158	AKT2,CD40,FASLG,FCGR2B,HCK,IFIH1,IFIT2,IFIT3,IFNB1,IL12B,IL1A,IL1B,IL6,IRF5,IRF7,IRF9,ISG15,ISG20,LILRB4,MYD88,PIK3AP1,STAT1,STAT2,TLR3,TLR7,TNF,TNFSF10,TNFSF8
Role of Pattern Recognition Receptors in Recognition of Bacteria and Viruses	20.1	0.173	4	C3,C3AR1,C5AR1,CCL5,DDX58,EIF2AK2,FASLG,IFIH1,IFNB1,IL12B,IL1A,IL1B,IL6,IRF7,MYD88,OAS1,Oas1b,OAS2,OAS3,PTX3,TLR1,TLR2,TLR3,TLR7,TNF,TNFSF10,TNFSF8
Pyroptosis Signaling Pathway	12.1	0.172	4	CASP4,GBP2,GBP4,GBP5,GBP7,GSDMD,IL1A,IL1B,IL1R1,NAIP,TLR1,TLR2,TLR3,TLR7,TNF,TXNIP
Neutrophil Extracellular Trap Signaling Pathway	4.67	0.046	3.9	AKT2,CASP4,CCL5,CCR5,CD14,CYBB,FCGR3A/FCGR3B,GSDMD,HCK,HIF1A,IFNB1,IL1B,MLKL,NCF1,PLCE1,SELP,TLR2,TLR7,TNF
Crosstalk between Dendritic Cells and Natural Killer Cells	13.4	0.187	3.873	CCR7,CD40,CD69,CSF2RB,FAS,FASLG,HLA-A,HLA-E,HLA-G,IFNB1,IL12B,IL6,PRF1,TLR3,TLR7,TNF,TNFSF10
Dendritic Cell Maturation	5.26	0.0419	3.8	AKT2,B2M,CCR7,CD40,FCGR1A,FCGR2B,FCGR3A/FCGR3B,HLA-A,HLA-E,HLA-G,ICAM1,IFNB1,IL12B,IL1A,IL1B,IL1RN,IL6,MYD88,NFKBIA,PLCE1,STAT1,STAT2,TLR2,TLR3,TNF
Neuroinflammation Signaling Pathway	19.3	0.11	3.651	AKT2,B2M,CCL2,CCL5,CD40,CXCL10,CXCL12,CYBB,FAS,FASLG,GABRR2,HLA-A,HLA-E,HLA-G,ICAM1,IFNB1,IL12B,IL1B,IL1R1,IL6,IRF7,MFGE8,MMP3,MYD88,NAIP,NCF1,NFE2L2,PTGS2,STAT1,TLR1,TLR2,TLR3,TLR7,TNF,VCAM1
Role of PKR in Interferon Induction and Antiviral Response	11.5	0.132	3.638	ATF3,DDX58,EIF2AK2,FAS,FASLG,FCGR1A,IFIH1,IFNB1,IL1B,IRF1,IRF9,MSR1,MYD88,NFKBIA,STAT1,STAT2,TLR3,TNF
IL-17 Signaling	8.34	0.0909	3.638	AKT2,CCL11,CCL2,Chil3/Chil4,CSF3,FASLG,IL12B,IL1A,IL1B,IL6,LCN2,MMP13,MMP3,PTGS2,TNF,TNFSF10,TNFSF8
Necroptosis Signaling Pathway	6.08	0.0833	3.606	CYBB,EIF2AK2,FAS,FASLG,IFNB1,IRF9,MLKL,STAT1,STAT2,TLR3,TNF,TNFSF10,ZBP1
TREM1 Signaling	11	0.182	3.207	AKT2,CCL2,CD40,FCGR2B,ICAM1,IL1B,IL6,MYD88,NLRC5,TLR1,TLR2,TLR3,TLR7,TNF
Wound Healing Signaling Pathway	4.45	0.0556	3.207	CCL5,FASLG,IL12B,IL1A,IL1B,IL1R1,IL1R2,IL1RN,IL6,NFKBIA,STAT1,TNF,TNFSF10,TNFSF8
Toll-like Receptor Signaling	10.9	0.179	3.162	CD14,EIF2AK2,IL12B,IL1A,IL1B,IL1RN,MYD88,NFKBIA,TLR1,TLR2,TLR3,TLR7,TNF,UBD
Role Of Osteoblasts In Rheumatoid Arthritis Signaling Pathway	8.91	0.082	3.13	AKT2,ALPL,CTSC,CXCL12,FASLG,FZD10,IL12B,IL1A,IL1B,IL6,MMP13,MMP15,MMP17,MMP3,PTGS2,STAT1,STAT2,TNF,TNFSF10,TNFSF8
Interferon Signaling	16.1	0.389	3.051	IFI35,IFIT1,IFIT3,IFITM3,IFNB1,IRF1,IRF9,ISG15,OAS1,PSMB8,SOCS1,STAT1,STAT2,TAP1
Differential Regulation of Cytokine Production in Intestinal Epithelial Cells by IL-17A and IL-17F	10.6	0.391	3	CCL2,CCL4,CCL5,CSF3,IL12B,IL1A,IL1B,LCN2,TNF
Immunogenic Cell Death Signaling Pathway	5.02	0.1	3	CXCL10,Gzmb,IFNB1,IL1B,IL6,MLKL,PRF1,TLR3,TNF
NF-ÎºB Signaling	1.83	0.028	3	AKT2,CD40,EIF2AK2,IL1A,IL1B,IL1R1,IL1R2,IL1RN,MAP3K8,MYD88,NFKBIA,TLR1,TLR2,TLR3,TLR7,TNF
Differential Regulation of Cytokine Production in Macrophages and T Helper Cells by IL-17A and IL-17F	9.99	0.444	2.828	CCL2,CCL4,CCL5,CSF3,IL12B,IL1B,IL6,TNF
Retinoic acid Mediated Apoptosis Signaling	5.47	0.133	2.828	IFNB1,IRF1,PARP10,PARP12,PARP14,PARP3,PARP9,TNFSF10
Hepatic Fibrosis Signaling Pathway	5.06	0.0473	2.828	AKT2,CCL2,CCL5,CD40,CYBB,FZD10,HIF1A,ICAM1,IL1A,IL1B,IL1R1,IL1R2,IL1RN,ITGAD,MMP13,MYD88,NCF1,NFKBIA,TNF,VCAM1
Role of MAPK Signaling in Inhibiting the Pathogenesis of Influenza	7.51	0.139	2.714	CCL2,CCL5,CXCL10,EIF2AK2,IFNB1,IL1B,IL6,MYD88,NFKBIA,PTGS2,TNF
p38 MAPK Signaling	5.64	0.0917	2.714	FAS,FASLG,HSPB2,IL1A,IL1B,IL1R1,IL1R2,IL1RN,STAT1,TIFA,TNF
Production of Nitric Oxide and Reactive Oxygen Species in Macrophages	3.75	0.0576	2.714	AKT2,APOD,CYBB,IRF1,MAP3K6,MAP3K8,NCF1,NFKBIA,STAT1,TLR2,TNF
G-Protein Coupled Receptor Signaling	2.23	0.0284	2.683	ADRA2B,AKT2,C3AR1,C5AR1,CCR5,CCR7,CCRL2,FPR2,FZD10,GPR141,GPR35,GPR65,GPR84,HCAR2,MAP3K6,MAP3K8,NFKBIA,PLCE1,PROKR1,SIX3
Role Of Chondrocytes In Rheumatoid Arthritis Signaling Pathway	10.3	0.121	2.668	CCL2,CEBPD,CXCL12,IL1A,IL1B,IL1R1,IL1R2,IL1RN,IL6,MLKL,MMP13,MMP15,MMP17,MMP3,PTGS2,TLR2,TNF
Xenobiotic Metabolism AHR Signaling Pathway	3.44	0.0805	2.646	CYP1B1,IL1A,IL1B,IL6,MGST2,TNF,UGT1A6
LPS/IL-1 Mediated Inhibition of RXR Function	2.24	0.0394	2.646	CD14,IL1A,IL1B,IL1R1,IL1R2,IL1RN,MGST2,MYD88,PLTP,TNF
Acute Phase Response Signaling	12	0.114	2.5	AKT2,C1R,C2,C3,C4A/C4B,CFB,CP,IL1A,IL1B,IL1R1,IL1RN,IL6,MYD88,NFKBIA,OSMR,Saa3,SERPINA3,SERPING1,SOCS1,SOCS3,TNF
Breast Cancer Regulation by Stathmin1	1.69	0.0269	2.5	ADRA2B,ARHGEF19,C3AR1,C5AR1,CCR5,CCR7,CCRL2,FPR2,FZD10,GPR141,GPR35,GPR65,GPR84,HCAR2,HIF1A,PROKR1
CREB Signaling in Neurons	1.61	0.0264	2.5	ADRA2B,AKT2,C3AR1,C5AR1,CCR5,CCR7,CCRL2,FPR2,FZD10,GPR141,GPR35,GPR65,GPR84,HCAR2,PLCE1,PROKR1
Cardiac Hypertrophy Signaling (Enhanced)	4.47	0.0406	2.357	ADRA2B,AKT2,CSF2RB,CYBB,FASLG,FZD10,HSPB2,IL12B,IL12RB1,IL1A,IL1B,IL1R1,IL1R2,IL6,ITGAD,MAP3K6,MAP3K8,PLCE1,PTGS2,TNF,TNFSF10,TNFSF8
Activation of IRF by Cytosolic Pattern Recognition Receptors	13.4	0.231	2.324	CD40,DDX58,DHX58,IFIH1,IFIT2,IFNB1,IL6,IRF7,IRF9,ISG15,NFKBIA,STAT1,STAT2,TNF,ZBP1
Role Of Osteoclasts In Rheumatoid Arthritis Signaling Pathway	4.63	0.0518	2.324	AKT2,FCGR1A,FCGR2B,FCGR3A/FCGR3B,IL1B,IL1R1,IL1R2,IL7,LCP2,MMP13,MMP15,MMP17,MMP3,NAIP,NFKBIA,TNF
Death Receptor Signaling	7.59	0.125	2.309	FAS,FASLG,HSPB2,NAIP,NFKBIA,PARP10,PARP12,PARP14,PARP3,PARP9,TNF,TNFSF10
FAK Signaling	1.32	0.0221	2.294	ADRA2B,AKT2,C3AR1,C5AR1,CCR5,CCR7,CCRL2,CSF2RB,ETV4,FPR2,FZD10,GPR141,GPR35,GPR65,GPR84,HCAR2,IL12RB1,IL1R1,IL1R2,ITGAD,PROKR1,SOCS1,SOCS3
Role of IL-17F in Allergic Inflammatory Airway Diseases	4.12	0.128	2.236	CCL2,CCL4,CXCL10,IL1B,IL6,MMP13
Cholecystokinin/Gastrin-mediated Signaling	1.45	0.042	2.236	IL1A,IL1B,IL1RN,PTGS2,TNF
IL-15 Production	1.4	0.0407	2.236	HCK,IFNB1,IL6,IRF1,STAT1
Salvage Pathways of Pyrimidine Ribonucleotides	3.92	0.0825	2.121	AKT2,APOBEC1,APOBEC3B,CMPK2,EIF2AK2,MAP3K6,MAP3K8,SGK1
HMGB1 Signaling	6.53	0.0838	2.111	AKT2,CCL2,FASLG,ICAM1,IL12B,IL1A,IL1B,IL1R1,IL6,SELE,TNF,TNFSF10,TNFSF8,VCAM1
Type I Diabetes Mellitus Signaling	2.28	0.0314	2.111	FAS,FASLG,HLA-A,HLA-E,HLA-G,IL12B,IL1B,IL1R1,IRF1,MYD88,NFKBIA,PRF1,SOCS1,SOCS3,STAT1,TNF
iNOS Signaling	3.14	0.106	2	CD14,IRF1,MYD88,NFKBIA,STAT1
Oncostatin M Signaling	2.39	0.093	2	MMP13,MMP3,OSMR,STAT1
VDR/RXR Activation	1.51	0.0513	2	CCL5,CD14,CDKN1A,CXCL10
Osteoarthritis Pathway	4.77	0.0593	1.941	ALPL,CASP4,FZD10,HIF1A,IL1B,IL1R1,IL1R2,ITGAD,MMP13,MMP3,NAMPT,PTGS2,TLR2,TNF
Th1 Pathway	8.27	0.115	1.732	CCR5,CD274,CD40,HLA-A,ICAM1,ICOSLG/LOC102723996,IL12B,IL12RB1,IL27,IL6,IRF1,SOCS1,SOCS3,STAT1
Role of JAK family kinases in IL-6-type Cytokine Signaling	5.5	0.114	1.667	CEBPD,IL27,IL6,IRF1,OSMR,SERPINA3,SOCS1,SOCS3,STAT1
NAD Signaling Pathway	3.28	0.0596	1.667	AKT2,BST1,HIF1A,NAMPT,PARP10,PARP12,PARP14,PARP3,PARP9
Ribonucleotide Reductase Signaling Pathway	2.91	0.0529	1.667	AKT2,CDKN1A,HIF1A,IL6,PARP10,PARP12,PARP14,PARP3,PARP9
Chemokine Signaling	2.83	0.0741	1.633	CCL11,CCL2,CCL4,CCL5,CCR5,CXCL12
FcÎ³ Receptor-mediated Phagocytosis in Macrophages and Monocytes	2.5	0.0638	1.633	AKT2,FCGR1A,FCGR3A/FCGR3B,HCK,LCP2,NCF1
IL-8 Signaling	1.81	0.0381	1.633	AKT2,ANGPT2,CYBB,ICAM1,NCF1,NFKBIA,PTGS2,VCAM1
Xenobiotic Metabolism General Signaling Pathway	1.65	0.042	1.633	AKT2,MAP3K6,MAP3K8,MGST2,NFE2L2,UGT1A6
Colorectal Cancer Metastasis Signaling	4.11	0.0517	1.604	AKT2,FZD10,IL6,MMP13,MMP15,MMP17,MMP3,PTGS2,STAT1,TLR1,TLR2,TLR3,TLR7,TNF
Adrenomedullin signaling pathway	1.94	0.0402	1.414	AKT2,C3,HIF1A,IL1A,IL1B,IL1RN,PLCE1,TNF
Role of RIG1-like Receptors in Antiviral Innate Immunity	4.18	0.13	1.342	DDX58,DHX58,IFIH1,IFNB1,IRF7,NFKBIA
FAT10 Cancer Signaling Pathway	3.02	0.1	1.342	AKT2,IL6,NFKBIA,TNF,UBD
Pyridoxal 5'-phosphate Salvage Pathway	2.51	0.0769	1.342	AKT2,EIF2AK2,MAP3K6,MAP3K8,SGK1
GM-CSF Signaling	2.37	0.0714	1.342	AKT2,BCL2A1,CSF2RB,HCK,STAT1
Inhibition of ARE-Mediated mRNA Degradation Pathway	1.91	0.0432	1.342	AKT2,FASLG,PSMB8,PSMB9,TNF,TNFSF10,TNFSF8
p53 Signaling	1.77	0.051	1.342	AKT2,CDKN1A,FAS,HIF1A,TP53INP1
Natural Killer Cell Signaling	6.39	0.0758	1.291	AKT2,B2M,CD244,FASLG,FCGR3A/FCGR3B,HLA-A,HLA-E,HLA-G,IL12B,IL12RB1,LCP2,MAP3K6,MAP3K8,MYD88,TNFSF10
HIF1Î± Signaling	2.86	0.0481	1.265	AKT2,CDKN1A,CYBB,HIF1A,IL6,MMP13,MMP15,MMP17,MMP3,NCF1
IL-6 Signaling	7.04	0.101	1.155	AKT2,CD14,HSPB2,IL1A,IL1B,IL1R1,IL1R2,IL1RN,IL6,NFKBIA,SOCS1,SOCS3,TNF
Pulmonary Healing Signaling Pathway	4.24	0.0603	1.155	CXCL12,FZD10,HCK,HIF1A,MMP13,MMP15,MMP17,MMP3,MYD88,NFKBIA,TLR2,TNF
Complement System	7.16	0.216	1.134	C1R,C2,C3,C3AR1,C4A/C4B,C5AR1,CFB,SERPING1
Tumor Microenvironment Pathway	11.3	0.112	0.894	AKT2,CCL2,CD274,CSF3,CXCL12,FAS,FASLG,HIF1A,HLA-A,HLA-E,HLA-G,ICAM1,IL1B,IL6,MMP13,MMP15,MMP17,MMP3,PTGS2,TNF
Apoptosis Signaling	2.28	0.0577	0.816	BCL2A1,FAS,FASLG,NAIP,NFKBIA,TNF
Apelin Endothelial Signaling Pathway	1.68	0.0426	0.816	AKT2,APLN,CCL2,HIF1A,ICAM1,VCAM1
Aryl Hydrocarbon Receptor Signaling	4.47	0.0692	0.707	CDKN1A,CYP1B1,FAS,FASLG,HSPB2,IL1A,IL1B,IL6,MGST2,NFE2L2,TNF
STAT3 Pathway	3.64	0.0667	0.447	CDKN1A,CSF2RB,IL12RB1,IL1A,IL1B,IL1R1,IL1R2,SOCS1,SOCS3
Role of PI3K/AKT Signaling in the Pathogenesis of Influenza	3.3	0.0909	0.447	AKT2,CCL5,CCR5,IFNB1,NFKBIA,PLAC8
PI3K/AKT Signaling	2.99	0.05	0.447	AKT2,CDKN1A,CSF2RB,IL12RB1,IL1R1,IL1R2,ITGAD,MAP3K8,NFKBIA,PTGS2
Induction of Apoptosis by HIV1	2.51	0.0769	0.447	FAS,FASLG,NAIP,NFKBIA,TNF
HGF Signaling	2.38	0.053	0.447	AKT2,CDKN1A,IL6,ITGAD,MAP3K6,MAP3K8,PTGS2
IL-23 Signaling Pathway	6.38	0.174	0.378	AKT2,HIF1A,IL12B,IL12RB1,IL1B,NFKBIA,SOCS3,TNF
Leukocyte Extravasation Signaling	3.11	0.0518	0.333	ARHGAP8/PRR5-ARHGAP8,CXCL12,CYBB,ICAM1,MMP13,MMP15,MMP17,MMP3,NCF1,VCAM1
ID1 Signaling Pathway	2.42	0.0448	0.333	AKT2,ATF3,BCL3,CDKN1A,HCK,HIF1A,IL6,PLAC8,TNF
IL-9 Signaling	2.72	0.114	0	BCL3,SOCS3,STAT1,TNF
Inhibition of Matrix Metalloproteases	2.55	0.103	0	MMP13,MMP15,MMP17,MMP3
IL-13 Signaling Pathway	2.06	0.0517	0	AKT2,CCL11,HCK,SOCS1,SOCS3,STAT1
Apelin Adipocyte Signaling Pathway	1.88	0.0543	0	APLN,CYBB,HIF1A,MGST2,NCF1
Prolactin Signaling	1.82	0.0526	0	IRF1,NMI,SOCS1,SOCS3,STAT1
IL-17A Signaling in Airway Cells	1.72	0.0597	0	AKT2,CCL11,IL6,NFKBIA
IL-7 Signaling Pathway	1.51	0.0513	0	AKT2,IL7,SOCS1,STAT1
Macrophage Alternative Activation Signaling Pathway	7.83	0.0842	-0.243	AKT2,Chil3/Chil4,CXCL13,FCGR2B,IL12B,IL1A,IL1B,IL1R2,IL1RN,IL6,IRF5,NFKBIA,SOCS1,SOCS3,STAT1,TNF,TSC22D3
JAK/STAT Signaling	3.59	0.0854	-0.378	AKT2,CDKN1A,IL6,SOCS1,SOCS3,STAT1,STAT2
Th2 Pathway	2.92	0.0584	-0.447	CCR5,CD40,HLA-A,ICAM1,ICOSLG/LOC102723996,IL12B,IL12RB1,SOCS3
PD-1, PD-L1 cancer immunotherapy pathway	4.42	0.0841	-0.707	AKT2,B2M,CD274,HLA-A,HLA-E,HLA-G,IL12B,LCP2,TNF
MSP-RON Signaling In Macrophages Pathway	2.01	0.0504	-0.816	IL12B,PTGS2,SOCS1,SOCS3,STAT1,TNF
CDX Gastrointestinal Cancer Signaling Pathway	4.84	0.0644	-0.832	AKT2,CYBB,FASLG,FZD10,IL12B,IL1A,IL1B,IL6,NCF1,PTGS2,TNF,TNFSF10,TNFSF8
HOTAIR Regulatory Pathway	3.04	0.0552	-1	AKT2,CDKN1A,ICAM1,IRF1,MMP13,MMP15,MMP17,MMP3,NFKBIA
BEX2 Signaling Pathway	1.44	0.0488	-1	AKT2,CDKN1A,HIF1A,NFKBIA
Coronavirus Pathogenesis Pathway	11.2	0.103	-1.091	CCL2,CCL5,DDX58,FASLG,HIF1A,IFNB1,IL1B,IL6,IRF7,IRF9,NFKBIA,OAS1,Oas1b,OAS2,OAS3,PTGS2,STAT1,STAT2,TLR3,TLR7,ZC3HAV1
IL-10 Signaling	12.6	0.13	-1.342	AKT2,BCL3,CCR5,CDKN1A,FCGR2B,HIF1A,HLA-A,HLA-E,HLA-G,ICAM1,IL1A,IL1B,IL1R1,IL1R2,IL1RN,IL6,NFKBIA,SOCS3,STAT1,TNF
PPARÎ±/RXRÎ± Activation	1.52	0.0359	-1.342	BCL3,IL1B,IL1R1,IL1R2,IL6,NFKBIA,PLCE1
Apelin Cardiac Fibroblast Signaling Pathway	3.43	0.174	-2	AKT2,ANGPT2,APLN,IL6
LXR/RXR Activation	10.2	0.13	-2.324	APOD,C3,C4A/C4B,CCL2,CD14,IL1A,IL1B,IL1R1,IL1R2,IL1RN,IL6,MSR1,PLTP,PTGS2,TLR3,TNF
Erythropoietin Signaling Pathway	6.23	0.0791	-2.673	AKT2,CSF2RB,FASLG,HBA1/HBA2,HBB,HIF1A,IL12B,IL1A,IL1B,IL6,NFKBIA,TNF,TNFSF10,TNFSF8
PPAR Signaling	3.63	0.0748	-2.828	IL1A,IL1B,IL1R1,IL1R2,IL1RN,NFKBIA,PTGS2,TNF

## Sheet: UpStreamRegulators
Upstream Regulator	Expr Log Ratio	Molecule Type	Predicted Activation State	Activation z-score	Flags	p-value of overlap	Target Molecules in Dataset	Mechanistic Network
lipopolysaccharide		chemical drug	Activated	13.182	bias	8.39e-117	9930111J21Rik1/Gm12185,ACOD1,ANGPT2,ANLN,APOBEC1,APOBEC3B,Apol10a (includes others),APOL6,ASCC3,ATF3,B2M,BC147527,BCL2A1,BCL3,C1R,C3,C3AR1,C5AR1,CASP4,CCL11,CCL19,CCL2,Ccl2,CCL3L3,CCL4,CCL5,Ccl7,CCR5,CCR7,CCRL2,CD14,CD274,CD40,Cd52,CD69,CDKN1A,CEBPD,CFB,CH25H,Chil3/Chil4,CLEC4D,CLEC4E,CLIC5,CMPK2,CP,CSF2RB,CSF3,CTSC,CXCL10,Cxcl11,CXCL12,CXCL13,CXCL16,CXCL2,Cxcl9,CYBB,DDX58,DDX60,DHX58,DTX3L,EIF2A…	274 (17)
IFNG		cytokine	Activated	11.938	bias	7.01e-126	ACOD1,ALPL,APOL6,ATF3,B2M,BATF2,BCL2A1,BCL3,BST1,Bst2,C1R,C2,C3,C4A/C4B,C5AR1,CASP4,CCL11,CCL19,CCL2,Ccl2,CCL3L3,CCL4,CCL5,Ccl7,CCR5,CCR7,CCRL2,CD14,CD274,CD40,CDKN1A,CEBPD,CFB,CH25H,Chil3/Chil4,CLEC4E,CLIC5,CMPK2,CP,CSF2RB,CSF3,CTSC,CXCL10,Cxcl11,CXCL12,CXCL13,CXCL16,CXCL2,Cxcl9,CYBB,DDX58,DDX60,DTX3L,EIF2AK2,ERAP1,FAS,FASLG,FCGR1A,FCGR2B,FCGR3A/FCGR3B,FGL2,FKBP5,FPR2,GBP2,GBP4,GBP5,GBP6,GBP7,GS…	257 (16)
poly rI:rC-RNA		biologic drug	Activated	10.361	bias	1.1e-108	ACOD1,Apol10a (includes others),Apol9a/Apol9b,ATF3,B2M,Bst2,C2,C3,CCL11,CCL2,Ccl2,CCL3L3,CCL4,CCL5,CCR7,CD14,CD274,CD40,CD69,CEBPD,CENPE,CFB,Clec2d (includes others),CLEC4E,CMPK2,CSF3,CXCL10,Cxcl11,CXCL2,Cxcl9,DDX58,DDX60,DHX58,EIF2AK2,FAS,FASLG,FCGR1A,FCGR2B,GBP2,GBP4,GBP6,Gm4951,GPR84,Gzmb,HERC6,HIF1A,HLA-A,HLA-E,HLA-G,HSPB2,ICAM1,IFI16,IFI44,IFIH1,IFIT1,IFIT1B,IFIT2,IFIT3,IFITM3,IFNB1,Igtp,Iig…	248 (17)
TNF	7.115	cytokine	Activated	10.325	bias	1.81e-66	ACOD1,ANGPT2,APLN,APOBEC3B,ATF3,AW112010,B2M,BCL2A1,BCL3,C3,C3AR1,C4A/C4B,C5AR1,CASP4,CCL11,CCL19,CCL2,Ccl2,CCL3L3,CCL4,CCL5,Ccl7,CCR5,CCR7,CCRL2,CD14,CD274,CD40,CD69,CDKN1A,CEBPD,CFB,CH25H,CLEC4E,CP,CSF2RB,CSF3,CST7,CTSC,CXCL10,Cxcl11,CXCL12,CXCL13,CXCL16,CXCL2,Cxcl9,CYBB,CYP1B1,DDX58,EIF2AK2,EMP2,FAS,FASLG,FCGR2B,FPR2,GBP2,GBP4,GBP6,GPR84,GSDMD,HIF1A,HLA-A,HLA-E,ICAM1,ICOSLG/LOC102723996,IFI16,…	242 (15)
Interferon alpha		group	Activated	9.373	bias	5.63e-112	APOBEC3B,ATF3,B2M,BATF2,BCL2A1,BCL3,Bst2,C3,C3AR1,CCL19,CCL2,CCL5,CCR5,CCR7,CD274,CD40,CD69,CDKN1A,CH25H,CSF2RB,CXCL10,Cxcl11,CXCL2,Cxcl9,CYP1B1,DDX58,DHX58,EIF2AK2,EPSTI1,FAS,FASLG,FCGR1A,FCGR2B,GBP2,GBP5,GBP6,Gzmb,HERC6,HLA-A,HLA-G,ICAM1,IFI16,IFI35,IFI44,Ifi47,IFIH1,IFIT1,IFIT1B,IFIT2,IFIT3,IFITM3,IFNB1,Iigp1,IL12B,IL12RB1,IL1B,IL1R1,IL1RN,IL27,IL6,IL7,IRF1,IRF5,IRF7,IRF9,ISG15,ISG20,LGALS3BP,…	246 (17)
IL1B	3.482	cytokine	Activated	9.016	bias	9.49e-68	ACOD1,ALPL,APOL6,ATF3,B2M,BCL2A1,BCL3,C1R,C2,C3,C4A/C4B,CASP4,CCL11,CCL2,Ccl2,CCL3L3,CCL4,CCL5,Ccl7,CCR5,CCR7,CCRL2,CD14,CD244,CD274,CD40,CD69,CDKN1A,CEBPD,CFB,CMPK2,CP,CSF2RB,CSF3,CXCL10,Cxcl11,CXCL12,CXCL13,CXCL16,CXCL2,Cxcl9,CYBB,CYP1B1,EPSTI1,FAS,FASLG,FCGR2B,FKBP5,FPR2,GBP2,GBP4,GBP5,GBP6,Gzmb,HIF1A,HLA-A,HLA-E,ICAM1,ICOSLG/LOC102723996,IFI16,Ifi47,IFIT1,IFIT1B,IFIT2,IFIT3,IFITM3,IL12B,IL1A,…	244 (16)
STAT1	3.69	transcription regulator	Activated	8.964	bias	2.65e-126	ACOD1,ANGPT2,APOBEC3B,APOL6,B2M,BATF2,BCL2A1,C1R,C3,C4A/C4B,CASP4,CCL19,CCL2,Ccl2,CCL3L3,CCL4,CCL5,CCR7,CCRL2,CD14,CD274,CD40,CDKN1A,CEBPD,CFB,CH25H,Chil3/Chil4,CLIC5,CMPK2,CXCL10,Cxcl11,CXCL2,Cxcl9,DDX60,EIF2AK2,EPSTI1,FAS,FASLG,FCGR1A,FCGR2B,FGL2,GBP2,GBP4,GBP5,GBP6,Gzmb,HERC6,HIF1A,HLA-E,ICAM1,IFI16,IFI35,IFI44,Ifi47,IFIH1,IFIT1,IFIT1B,IFIT2,IFIT3,IFITM3,IFNB1,Igtp,Iigp1,IL12B,IL1A,IL1B,IL1R1,…	253 (17)
IRF7	5.027	transcription regulator	Activated	8.483	bias	1.7e-93	BC147527,CASP4,CCL19,Ccl2,CCL5,CCRL2,CD40,CD69,CMPK2,CXCL10,DDX58,DHX58,FCGR1A,GBP4,GBP5,IFI16,IFI35,IFI44,Ifi47,IFIH1,IFIT1,IFIT1B,IFIT2,IFIT3,IFITM3,IFNB1,Igtp,IL1A,IL27,IL6,IRF1,IRF5,IRF7,IRF9,IRGM,Irgm1,ISG15,ISG20,Ly6a (includes others),MAP3K8,Ms4a4c (includes others),Mx1,Mx2,NAMPT,NMI,OAS1,OAS2,OAS3,OASL,Oasl2,PARP12,PARP14,PHF11,PLAC8,PSMB8,PSMB9,RSAD2,RTP4,SAMD9L,Slfn1,SOCS1,STAT1,STAT2,T…	227 (17)
IRF3		transcription regulator	Activated	8.162	bias	2.67e-96	APOBEC3B,B2M,BC147527,Bst2,CCL19,CCL2,Ccl2,CCL3L3,CCL4,CCL5,CCRL2,CD274,CD40,CD69,CMPK2,CXCL10,Cxcl11,Cxcl9,DDX58,DDX60,DHX58,EIF2AK2,FAS,FCGR1A,GBP5,ICAM1,IFI16,Ifi27l2a/Ifi27l2b,IFI44,Ifi47,IFIH1,IFIT1,IFIT1B,IFIT2,IFIT3,IFITM3,IFNB1,Igtp,IL12B,IL1A,IL1B,IL27,IL6,IRF1,IRF5,IRF7,IRGM,Irgm1,ISG15,ISG20,Klrk1,LCN2,MMP3,Ms4a4c (includes others),Mx1,Mx2,NLRC5,OAS1,OAS2,OAS3,OASL,Oasl2,PARP12,PARP14,…	215 (13)
IFNA2		cytokine	Activated	8.153	bias	4.78e-73	APOL6,B2M,C1R,CCL2,CCL5,CD274,CD69,CDKN1A,CMPK2,CXCL10,CXCL13,DDX58,DDX60,EIF2AK2,FAS,GBP2,GBP4,Gzmb,HERC6,HIF1A,HLA-A,HLA-E,IFI16,IFI35,IFI44,IFIH1,IFIT1,IFIT2,IFIT3,IFITM3,IFNB1,IL1B,IL6,IRF1,IRF5,IRF7,IRF9,ISG15,ISG20,LGALS3BP,LILRB4,Mx2,OAS1,OAS2,OAS3,OASL,PARP12,PARP9,PHF11,RSAD2,SAMHD1,SLC15A3,SOCS1,SOCS3,SP110,STAT1,TAP1,THEMIS2,TLR3,TNF,TNFSF10,TREX1,TRIM14,TRIM21,UBA7,UBD,UBE2L6,UGT1A6,U…	235 (19)
ZBTB10		transcription regulator	Activated	8.059	bias	8.24e-78	9930111J21Rik1/Gm12185,ACOD1,B2M,Bst2,CASP4,CCL3L3,CCL4,CCL5,CCR7,CD244,CD274,CD40,CXCL10,Cxcl9,CYBB,DDX58,DHX58,DTX3L,GBP4,GBP5,GBP6,Gm5431,HLA-E,HLA-G,IFI16,Ifi27l2a/Ifi27l2b,Ifi47,IFIH1,IFIT1,IFIT1B,IFIT2,IFIT3,Ifitm1,IFITM3,IFNB1,Igtp,Iigp1,IL12B,IL1B,IL1RN,IL27,IL6,IRF1,IRGM,Irgm1,ISG15,ISG20,Klrk1,LGALS9B,Mx1,Mx2,MYD88,OAS1,OASL,PARP9,PTGS2,RNF135,RTP4,SAMHD1,SLFN13,STAT2,Tgtp1/Tgtp2,TNF,TR…	173 (11)
Ifnar		group	Activated	7.803	bias	1.59e-92	APOBEC3B,B2M,Bst2,C3,CCL2,Ccl2,CCL5,Ccl7,CD274,CD40,CXCL10,Cxcl9,DDX58,EIF2AK2,FASLG,GBP2,HLA-A,HLA-E,HLA-G,IFI16,IFI35,IFIH1,IFIT1B,IFIT2,IFIT3,IFITM3,IFNB1,IL12B,IL1B,IL6,IRF1,IRF7,IRF9,Irgm1,ISG15,ISG20,LGALS3BP,Mx1,Mx2,MYD88,NLRC5,OAS1,OAS2,OASL,PSMB8,PSMB9,RNF213,RSAD2,Sp100,STAT1,STAT2,TAP1,TAP2,TLR2,TLR3,TLR7,TNF,TNFSF10,TRIM21,UBE2L6,USP18,VCAM1,XAF1,ZBP1	250 (16)
NFkB (complex)		complex	Activated	7.779	bias	1.9e-40	ATF3,BCL2A1,BCL3,C1R,C3,CASP4,CCL11,CCL2,Ccl2,CCL3L3,CCL4,CCL5,Ccl7,CCR7,CD274,CD40,CD69,CDKN1A,CEBPD,CFB,CLEC4E,CSF3,CST7,CXCL10,CXCL12,CXCL2,Cxcl9,CYBB,ERAP1,FAS,FASLG,FCGR1A,FPR2,GBP2,HIF1A,HIF3A,HLA-A,ICAM1,ICOSLG/LOC102723996,IFNB1,IL12B,IL1A,IL1B,IL1RN,IL27,IL6,IRF1,IRF7,ISG15,LCN2,MAP3K8,MMP13,MMP3,NAMPT,NFKBIA,PLAUR,PSMB9,PTGS2,PTX3,RSAD2,Saa3,SELE,SERPINA3,SOCS1,SOCS3,TAP1,TAP2,TLR2,TNF,…	218 (14)
APP		other	Activated	7.57	bias	3.17e-47	ANKS4B,C1R,C3,C4A/C4B,CCL11,CCL2,Ccl2,CCL3L3,CCL4,CCL5,Ccl7,CCR5,CD40,CD69,CDKN1A,CH25H,Chil3/Chil4,CMPK2,CP,CSF2RB,CSF3,Ctla2a/Ctla2b,CXCL10,CXCL12,CXCL2,Cxcl9,CYBB,DDX58,FASLG,FCGR1A,FCGR2B,GBP2,GBP4,GBP6,HBA1/HBA2,HCAR2,HERC6,HLA-E,ICAM1,IFI16,IFI35,Ifi47,IFIH1,IFIT1B,IFIT2,Igtp,IL12B,IL1A,IL1B,IL27,IL6,IL7,IRF1,IRF5,IRF7,IRGM,Irgm1,ISG20,Ly6a (includes others),MAFF,MMP13,MMP3,MSR1,Mx1,Mx2,MYD…	227 (17)
TLR4		transmembrane receptor	Activated	7.502	bias	1.48e-62	APOBEC3B,ATF3,C3,CCL2,Ccl2,CCL3L3,CCL4,CCL5,Ccl7,CCR5,CCR7,CCRL2,CD14,CD274,CD40,CEBPD,CFB,CMPK2,CSF3,CXCL10,Cxcl11,CXCL2,Cxcl9,FAS,FASLG,FCGR2B,FGL2,GBP2,ICAM1,IFI16,Ifi47,IFIT1B,IFIT2,IFIT3,IFITM3,IFNB1,Igtp,Iigp1,IL12B,IL1A,IL1B,IL27,IL6,IRF1,IRF7,IRGM,Irgm1,ISG15,ISG20,LCN2,LILRB4,Mx1,Mx2,MYD88,NFKBIA,NMI,OASL,PLA1A,PLEK,PTGS2,PTX3,RGS1,RSAD2,SELE,SELP,SLFN12L,SOCS1,SOCS3,STAT1,STAT2,TLR2,TLR…	245 (19)
IRF1	3.263	transcription regulator	Activated	7.444	bias	2.84e-76	ACOD1,APOL6,B2M,C1R,CCL19,CCL2,CCL5,CD274,CD40,CDKN1A,CFB,CMPK2,CXCL10,CXCL16,CXCL2,Cxcl9,CYBB,DDX58,EIF2AK2,ERAP1,FAS,FASLG,FGL2,FPR2,GBP2,GBP4,HLA-G,IFI35,IFI44,Ifi47,IFIH1,IFIT1,IFIT2,IFIT3,IFITM3,IFNB1,IL12B,IL12RB1,IL1B,IL27,IL6,IL7,IRF1,IRF5,IRF7,IRF9,ISG15,OAS1,OAS2,OAS3,OASL,PSMB8,PSMB9,PTGS2,RSAD2,SAMHD1,SELL,SOCS1,SP110,STAT1,STAT2,TAP1,TAP2,TLR3,TMEM140,TNF,TNFSF10,TRIM21,UBD,VCAM1,XAF1	242 (16)
E. coli B4 lipopolysaccharide		chemical toxicant	Activated	7.389	bias	6.29e-74	9330175E14Rik,ACOD1,CA13,CCL11,CCL2,Ccl2,CCL3L3,CCL4,CCL5,CCR7,CD274,CD40,Cd52,CSF3,CXCL10,CXCL2,DDX58,EVI2B,FAS,FASLG,FCGR1A,FGL2,FPR2,GBP2,GBP4,Gm4951,H2-K2/H2-Q9,HLA-A,ICAM1,IFI16,IFI35,IFIT1B,IFIT3,IFITM3,IFNB1,Igtp,Iigp1,IL12B,IL1A,IL1B,IL1R1,IL1RN,IL27,IL6,LCN2,LCP1,LCP2,LILRB4,Ly6a (includes others),Mx1,NCF1,NFKBIA,Oasl2,PARP9,PLAUR,PLEK,Plscr2,PSMB8,PTGS2,PTPRC,RAB20,RSAD2,RTP4,SELE,Slfn2…	222 (16)
TICAM1		other	Activated	7.311	bias	8.08e-74	ACOD1,APOBEC3B,Apol10a (includes others),BCL3,CASP4,CCL2,Ccl2,CCL3L3,CCL4,CCL5,CCRL2,CD40,CEBPD,CFB,CH25H,CMPK2,CXCL10,Cxcl11,CXCL13,CXCL2,DDX58,FAS,FPR2,ICAM1,ICOSLG/LOC102723996,IFI16,Ifi47,IFIT1,IFIT1B,IFIT2,IFIT3,IFNB1,Igtp,IL12B,IL1A,IL1B,IL6,IRF1,IRF7,IRGM,Irgm1,ISG15,ISG20,MAFF,Ms4a4c (includes others),Mx1,Mx2,NFKBIA,OASL,PILRA,PTGS2,RSAD2,SAMHD1,SELE,SOCS1,SOCS3,TLR2,TLR3,TNF,TNFSF10,VCAM…	210 (19)
TLR3	2.465	transmembrane receptor	Activated	7.308	bias	5.21e-75	ACOD1,Apol10a (includes others),ATF3,BFSP2,C3,CCL11,CCL2,Ccl2,CCL3L3,CCL4,CCL5,Ccl7,CD274,CD40,CD69,CFB,CMPK2,CSF3,CXCL10,Cxcl11,CXCL2,Cxcl9,DDX58,DHX58,EIF2AK2,FAS,GBP2,GBP4,Gzmb,ICAM1,IFI16,IFI44,Ifi47,IFIH1,IFIT1,IFIT2,IFIT3,IFNB1,Iigp1,IL12B,IL1A,IL1B,IL1R2,IL1RN,IL27,IL6,IRF1,IRF7,ISG15,ISG20,Klrk1,LCN2,LILRB4,MAP3K8,Mx1,MYD88,NMI,OAS1,OASL,Oasl2,PTGS2,PTX3,RGS1,RSAD2,Saa3,SELE,SOCS1,SOCS3,S…	241 (19)
E. coli B5 lipopolysaccharide		chemical - endogenous non-mammalian	Activated	7.012	bias	3.31e-42	B2M,BCL3,CCL11,CCL19,CCL2,Ccl2,CCL3L3,CCL4,CCL5,Ccl7,CCR5,CCR7,CD274,CD40,CD69,CDKN1A,CSF3,CXCL10,Cxcl11,CXCL13,CXCL2,CYBB,GBP2,HLA-A,ICAM1,ICOSLG/LOC102723996,IFIT1,IFNB1,Igtp,IL12B,IL1A,IL1B,IL1R1,IL1R2,IL27,IL6,IL7,IRF1,ISG20,MAP3K8,MMP13,MYD88,NCF1,NFKBIA,OASL,PTGS2,SELE,SOCS3,TLR2,TLR3,TLR7,TNF	211 (12)
MYD88	1.899	other	Activated	6.88	bias	5.18e-47	ACOD1,APOBEC3B,BCL3,C3,CASP4,CCL2,Ccl2,CCL3L3,CCL4,CCL5,CCRL2,CD14,CD274,CD40,CEBPD,CH25H,CMPK2,CSF3,CXCL10,CXCL12,CXCL13,CXCL2,Cxcl9,FPR2,Gzmb,HCK,HIF1A,HLA-A,ICAM1,IFIT1B,IFIT2,IFNB1,IL12B,IL1A,IL1B,IL1RN,IL27,IL6,IL7,IRF1,IRF7,ISG15,MAFF,Ms4a4c (includes others),MSR1,NFKBIA,OASL,PILRA,PRF1,PTGS2,RSAD2,Saa3,SAMHD1,SELE,SOCS1,SOCS3,TLR2,TNF,USP18,VCAM1,XDH	217 (15)
OSM		cytokine	Activated	6.88	bias	1.08e-31	ANGPT2,ATF3,B2M,BCL3,C1R,CASP4,CCL11,CCL2,Ccl2,CCL5,CDKN1A,CEBPD,CH25H,CSF3,CXCL10,CXCL12,CXCL13,CXCL2,CYP1B1,GBP2,HIF1A,HLA-A,ICAM1,IFI35,IL1B,IL1R2,IL6,IL7,IRF1,IRF7,IRF9,ISG20,LCN2,LRG1,MMP13,MMP3,MYD88,NAMPT,OAS1,OSMR,PSMB8,PSMB9,SELE,SELP,SERPINA3,SERPING1,SOCS1,SOCS3,STAT1,STX11,TAP1,TAP2,TLR2,TLR3,TNF,UBE2L6,VCAM1,XDH,ZC3HAV1	222 (17)
BHLHE40		transcription regulator	Activated	6.748	bias	4.26e-36	ATF3,B2M,C3AR1,CASP4,Ccl7,CCR7,CCRL2,CD14,CD274,CD69,CFB,CP,CSF2RB,CSF3,Cxcl9,CYBB,EPSTI1,FAS,FCGR2B,FGL2,GBP2,GBP6,Gkn3,Gzmb,HIF1A,IFI16,IFIH1,Ifitm1,IL12RB1,IL1R2,IL6,IRF5,Klrk1,LCP2,LGALS3BP,MAFF,MSR1,NAMPT,PARP9,PLAC8,PTGS2,PTPRC,RGS1,SAMHD1,SELL,SLAMF7,SOCS1,SOCS3,STAT1,TLR1,TNF	239 (11)
pyridostatin		chemical reagent	Activated	6.71	bias	2.1e-67	B2M,BATF2,CCL5,CCRL2,CMPK2,CXCL10,DDX60,DHX58,EIF2AK2,GBP4,HERC6,IFI35,IFI44,IFIH1,IFIT1,IFIT1B,IFIT2,IFIT3,IFITM3,IRF1,IRF7,IRF9,ISG15,ISG20,LGALS3BP,NMI,OASL,PARP12,PARP14,PARP9,PSMB8,PSMB9,RSAD2,RTP4,SAMD9L,SELL,SP110,STAT2,TAP1,TMEM140,TRIM14,TRIM21,TRIM5,UBA7,UBE2L6,USP18	225 (15)
RELA		transcription regulator	Activated	6.619	bias	2e-35	B2M,BCL2A1,BCL3,C3,CCL11,CCL19,CCL2,Ccl2,CCL5,Ccl7,CCR7,CD14,CD274,CD40,CD69,CDKN1A,CFB,CXCL10,CXCL2,CYBB,ERAP1,FAS,FASLG,HIF1A,HLA-A,ICAM1,IFIT1B,IFNB1,IL12B,IL1A,IL1B,IL1RN,IL27,IL6,IRF1,IRF7,ISG15,ISG20,MMP3,Mx1,NAMPT,NFE2L2,NFKBIA,NMI,OAS2,PSMB9,PTGS2,PTX3,RGS1,Saa3,SELE,SELP,Serpina3g (includes others),TAP1,TAP2,TLR2,TNF,UBD,VCAM1	219 (14)
tetradecanoylphorbol acetate		chemical drug	Activated	6.578	bias	2.46e-30	ANGPT2,APOBEC3B,ATF3,BCL2A1,BCL3,C3,C3AR1,C5AR1,CCL11,CCL2,Ccl2,CCL3L3,CCL4,CCL5,Ccl7,CCR7,CD14,CD69,CDK5R2,CDKN1A,CH25H,CSF3,CXCL10,Cxcl11,CXCL13,CXCL2,CYBB,EIF2AK2,ETNPPL,FAS,FASLG,FCGR1A,FKBP5,GPR35,Gzmb,HIF1A,ICAM1,ICOSLG/LOC102723996,IFI16,IFI35,IL12B,IL12RB1,IL1A,IL1B,IL1RN,IL6,IRF1,IRF7,ISG15,ITGAD,LCN2,MMP13,MMP3,MSR1,NCF1,NFKBIA,OAS1,PER2,PLAUR,PNP,PRF1,PTGS2,PTPRC,RGS1,SELE,SELL,SELP,SE…	229 (17)
TLR9		transmembrane receptor	Activated	6.533	bias	4.25e-45	9830107B12Rik/A530064D06Rik,ACOD1,ATF3,BFSP2,Ccl2,CCL3L3,CCL4,CCL5,Ccl7,CCR7,CD274,CD40,CD69,CSF3,CXCL10,CXCL2,FAS,ICAM1,IFI16,IFI35,IFIT1,IFIT1B,IFIT2,IFIT3,IFNB1,IL12B,IL1A,IL1B,IL6,IRF1,IRF7,IRF9,ISG15,ISG20,LCN2,LILRB4,Mx1,MYD88,NAMPT,OAS2,OAS3,Oasl2,PTGS2,RSAD2,Saa3,SOCS1,SOCS3,STAT1,STAT2,TLR7,TNF,TNFSF10,USP18	242 (16)
NONO		transcription regulator	Activated	6.493	bias	4.64e-45	ATP10A,CCL5,CMPK2,CXCL10,DDX58,DDX60,EIF2AK2,EPSTI1,GBP4,GBP5,HCAR2,HERC6,IFI44,IFIH1,IFIT1,IFIT2,IFIT3,ISG15,ISG20,LGALS3BP,OAS1,OAS2,OAS3,OASL,PARP14,PARP9,RNF213,RSAD2,RTP4,SAMD9L,SERPING1,SLAMF7,SLFN5,SP110,SP140,STAT1,STAT2,TLR3,TNFSF10,TNFSF8,UBE2L6,USP18,XAF1
IFNL1		cytokine	Activated	6.436	bias	9.45e-57	APOL6,ATF3,CCR7,CD40,CMPK2,CXCL10,DDX58,DDX60,EIF2AK2,GBP5,HERC6,IFI35,IFI44,IFIH1,IFIT1,IFIT2,IFIT3,IFITM3,IL12B,IL6,IRF9,ISG15,ISG20,LGALS3BP,MLKL,OAS1,OAS2,OAS3,OASL,PHF11,PSMB9,RSAD2,RTP4,SLC15A3,SP110,STAT1,STAT2,TLR2,TMEM140,TRIM14,UBE2L6,USP18,XAF1,ZC3HAV1	246 (17)
IL21		cytokine	Activated	6.406	bias	6.14e-55	CCL11,CCL3L3,CCL4,CCL5,CCR7,CCRL2,CD244,CD69,CDKN1A,CLIC5,CMPK2,CXCL10,CXCL13,Cxcl9,EIF2AK2,FASLG,FCGR2B,FGL2,GBP5,GBP6,Gzmb,HERC6,HIF1A,IFI16,IFIT1,IFIT1B,IFIT2,IFIT3,Igtp,IL6,IRF5,IRF7,Irgm1,ISG15,Klrk1,Mx2,MYD88,OAS2,OASL,PRF1,PSMB9,PTPRC,RSAD2,SELL,Serpina3g (includes others),SGK1,SLFN13,SOCS1,SOCS3,STAT2,TAP1,Tgtp1/Tgtp2,TNF,USP18	261 (17)
salmonella minnesota R595 lipopolysaccharides		chemical - endogenous non-mammalian	Activated	6.403	bias	3.89e-47	ACOD1,BCL3,CASP4,CCL2,Ccl2,CCL3L3,CCL4,CCL5,Ccl7,CCRL2,CEBPD,CH25H,CMPK2,CXCL10,CXCL13,CXCL2,FPR2,ICAM1,IFIT1B,IFIT2,IL12B,IL1A,IL1B,IL6,IRF1,ISG15,MAFF,Ms4a4c (includes others),NFKBIA,OASL,PILRA,PTGS2,RSAD2,SAMHD1,Slfn1,SLFN12L,SLFN13,Slfn2,SLFN5,SOCS3,TLR2,TNF,VCAM1	225 (16)
SAMSN1		other	Activated	6.245	bias	1.06e-46	CCL3L3,CCL4,Ccl7,CD40,CMPK2,CXCL10,Cxcl11,CXCL2,Cxcl9,FGL2,IFIT1B,IFIT2,IFIT3,IFNB1,Iigp1,IL12B,IL6,IRF1,IRF7,IRGM,ISG15,ISG20,Mx2,NMI,OASL,PLA1A,PTGS2,RSAD2,SLFN12L,SOCS1,SOCS3,STAT1,STAT2,TLR3,TNF,TNFSF8,Trim12a,TRIM21,USP25	207 (11)
STING1		other	Activated	6.21	bias	1.12e-46	CCL2,CCL3L3,CCL4,CCL5,CXCL10,CXCL2,Cxcl9,DDX58,DDX60,GBP4,GBP5,HLA-A,ICAM1,IFI16,Ifi27l2a/Ifi27l2b,IFI35,IFI44,IFIT1,IFIT1B,IFIT2,IFIT3,IFITM3,IFNB1,IL1A,IL1B,IL6,IRF5,IRF7,IRF9,ISG15,LCN2,MMP13,MMP3,Mx1,OAS1,OAS3,OASL,PLAUR,PLEKHA4,PTPRC,RSAD2,Serpina3g (includes others),SERPING1,TNF,USP18	233 (20)
TLR7	2.094	transmembrane receptor	Activated	6.184	bias	2.34e-45	Apol9a/Apol9b,ATF3,BCL2A1,BFSP2,CCL2,Ccl2,CCL4,CCL5,Ccl7,CCR7,CD274,CD40,CD69,CDKN1A,CXCL10,CXCL13,CXCL2,ETV4,GPR84,ICAM1,IFI35,IFI44,IFIT1,IFIT1B,IFIT3,IFNB1,IL12B,IL1B,IL1R1,IL27,IL6,IRF1,IRF7,IRF9,ISG15,ISG20,Ms4a6c,Mx1,MYD88,NFKBIA,OAS2,OAS3,PHF11,PTX3,RSAD2,SELE,SOCS1,STAT1,STAT2,TLR7,TNF	254 (17)
IL6	6.402	cytokine	Activated	6.173	bias	1.78e-46	ATF3,BCL3,C3,C5AR1,CASP4,CCL11,CCL2,Ccl2,CCL3L3,CCL4,CCL5,CCR5,CCR7,CD14,CD274,CD40,CDKN1A,CEBPD,CENPE,Chil3/Chil4,CLEC4E,CP,CSF2RB,CTSC,CXCL10,CXCL13,CXCL2,Cxcl9,CYBB,CYP1B1,ETV4,FAS,FASLG,FCGR1A,FPR2,GBP2,Gzmb,HIF1A,HLA-A,ICAM1,ICOSLG/LOC102723996,IFI16,IFIT1,IFIT1B,IFIT2,IFITM3,IFNB1,IL12B,IL1B,IL1R1,IL1RN,IL6,IL7,IRF1,IRF9,LCN2,LRG1,MMP13,MMP3,MSR1,MYD88,NAMPT,NFKBIA,PLEK,PRF1,PSMB8,PSMB9,PTG…	216 (13)
Ifn		group	Activated	6.16	bias	1.26e-43	B2M,CD40,CD69,CH25H,CXCL10,DDX58,DHX58,EIF2AK2,FAS,HIF1A,HLA-A,ICAM1,IFI16,IFIH1,IFIT1,IFITM3,IL12B,IL1R1,IL27,IL7,IRF1,IRF7,ISG15,ISG20,LCN2,Mx1,Mx2,OAS2,OAS3,OASL,RSAD2,SOCS1,STAT1,TAP1,TLR1,TLR2,TLR3,TLR7,TRIM21,XDH,ZBP1	232 (17)
IFNB1	7.149	cytokine	Activated	6.09	bias	8.05e-84	ACOD1,APOBEC1,Apol10a (includes others),APOL6,Bst2,CCL2,Ccl2,CCL4,CCL5,CCR5,CD14,CD274,CD40,CDKN1A,CH25H,CLEC4E,CMPK2,Ctla2a/Ctla2b,CXCL10,CXCL2,DDX58,DHX58,EIF2AK2,GBP2,GBP4,GBP5,GBP6,GBP7,Gvin1 (includes others),HLA-A,ICOSLG/LOC102723996,IFI16,Ifi27l2a/Ifi27l2b,Ifi47,IFIH1,IFIT1,IFIT1B,IFIT2,IFIT3,Ifitm1,IFNB1,Igtp,IL12B,IL1B,IL1R1,IL27,IL6,IRF1,IRF7,IRF9,IRGM,Irgm1,ISG15,ISG20,MGST2,Mx1,MYD88,…	223 (16)
IFNAR1		transmembrane receptor	Activated	6.08	bias	4.25e-79	ACOD1,Apol10a (includes others),Apol9a/Apol9b,ATF3,B2M,CCL3L3,CCL4,CCL5,CD274,CD40,CH25H,CLEC4D,CLEC4E,CLIC5,CMPK2,CXCL10,Cxcl11,CXCL13,CXCL2,Cxcl9,EIF2AK2,GBP4,HLA-A,IFI16,IFI44,IFIH1,IFIT1B,IFIT2,IFIT3,IFNB1,IL12B,IL1A,IL1B,IL27,IL6,IRF1,IRF7,ISG15,Ly6a (includes others),Ms4a4c (includes others),Mx1,OAS1,OAS2,OAS3,OASL,Oasl2,PARP12,PTGS2,RSAD2,RTP4,SLFN12L,SOCS1,SOCS3,Sp100,STAT1,TLR2,TLR3,TLR7…	221 (14)
CSF2		cytokine	Activated	5.978	bias	6.11e-37	ANLN,BCL2A1,BCL3,C3,C4A/C4B,C5AR1,CCL2,Ccl2,CCL3L3,CCL4,CCR5,CCR7,CCRL2,CD14,CD40,CD69,CDKN1A,CENPE,Chil3/Chil4,CLEC4E,CSF2RB,CSF3,CTSC,CXCL10,Cxcl11,CXCL2,Cxcl9,CYBB,FAS,FCGR1A,FCGR2B,FPR2,HCAR2,HIF1A,ICAM1,ICOSLG/LOC102723996,IFITM3,IL12B,IL1A,IL1B,IL1R1,IL1RN,IL6,IRF5,LCP1,NFKBIA,OSMR,PLAUR,PTGS2,Saa3,SCIMP,SGK1,SLAMF7,Slfn2,SOCS1,SOCS3,STEAP3,TIFA,TLR1,TLR2,TNF,TNFSF8,UBD	228 (14)
IL2		cytokine	Activated	5.978	bias	1.51e-33	ARHGAP8/PRR5-ARHGAP8,BCL2A1,C3,CASP4,CCL11,CCL2,Ccl2,CCL3L3,CCL4,CCL5,CCR5,CCR7,CD244,CD274,CD40,Cd52,CD69,CDKN1A,CSF2RB,CSF3,CST7,CTSC,CXCL10,CXCL12,Cxcl9,FAS,FASLG,FCGR3A/FCGR3B,FGL2,FPR2,GBP2,Gm12250,Gm3411 (includes others),Gzmb,HCK,ICAM1,IFI16,Iigp1,IL12B,IL12RB1,IL1A,IL1B,IL1R1,IL1R2,IL1RN,IL6,IRF1,IRGM,ISG15,ISG20,LCP2,LILRB4,Ly6a (includes others),NMI,PLAC8,PNP,PRF1,PTGS2,PTPRC,SELL,SELP,…	226 (18)
G protein alpha i		group	Activated	5.966	bias	1.88e-45	ATF3,Bst2,C1R,C4A/C4B,CD274,CEBPD,CXCL10,DDX58,FCGR2B,GBP2,GBP4,GBP5,GBP6,GBP7,Gm4951,HLA-A,IFIH1,IFIT1B,IFIT3,IFITM3,Igtp,Iigp1,IRGM,Irgm1,ISG15,MAFF,Oasl2,PSMB8,PSMB9,RAB20,RSAD2,SERPING1,SOCS3,TAP1,TGM1,USP18	197 (7)
Pam3-Cys-Ser-Lys4		chemical reagent	Activated	5.956	bias	2.38e-49	ANGPT2,BCL2A1,CASP4,CCL19,CCL2,Ccl2,CCL3L3,CCL4,CCL5,Ccl7,CCR5,CCR7,CD14,CD274,CD40,CD69,CSF3,CXCL10,CXCL13,CXCL2,Cxcl9,FCGR2B,HLA-A,ICAM1,ICOSLG/LOC102723996,IFI16,IFNB1,IL12B,IL1A,IL1B,IL27,IL6,IRF1,IRF7,MMP3,MYD88,NAMPT,NFKBIA,PARP14,PTGS2,RGS1,SELE,SELP,STAT1,TARM1,Tgtp1/Tgtp2,TLR1,TLR2,TLR3,TNF,VCAM1	209 (13)
AGT		growth factor	Activated	5.928	bias	9.11e-19	ANGPT2,APLN,ATF3,C3,C4A/C4B,C5AR1,CCL2,Ccl2,CCL3L3,CCL4,CCL5,Ccl7,CCR5,CCR7,CD14,CDKN1A,CENPE,CP,CXCL10,CXCL12,CXCL2,CYBB,ETV4,FCGR1A,FCGR2B,FKBP5,HIF1A,ICAM1,IFI16,IL1A,IL1B,IL6,IRF7,LCN2,MMP13,MMP3,MSR1,NAMPT,NCF1,NFE2L2,NFKBIA,PLAC8,PSMB8,PTGS2,PTPRC,Saa3,SELE,SELL,SERPINA3,SGK1,SLC10A6,SOCS1,SOCS3,TLR1,TNF,TXNIP,VCAM1	218 (16)
IFN Beta		group	Activated	5.868	bias	3.91e-64	ACOD1,ATF3,Bst2,C2,C3AR1,CASP4,CCL2,Ccl2,CCL5,CCR7,CD274,CD40,CD69,CDKN1A,CEBPD,CMPK2,CXCL10,Cxcl9,CYBB,DDX58,DHX58,EIF2AK2,FKBP5,HERC6,HLA-A,HLA-G,ICAM1,IFI16,IFI35,IFI44,IFIH1,IFIT1,IFIT1B,IFIT2,IFIT3,IL1A,IL1B,IL1RN,IL27,IL6,IRF1,IRF7,IRF9,ISG15,ISG20,LILRB4,Mx1,Mx2,OAS1,Oas1b,OAS2,OAS3,OASL,RSAD2,SOCS1,STAT1,STAT2,TAP1,TLR3,TLR7,TNF,TNFSF10,TRIM14,USP18,USP25,XAF1,ZBP1	229 (17)
DOCK8		other	Activated	5.831	bias	3.32e-43	CCL4,CD40,CMPK2,CXCL10,Cxcl11,Cxcl9,FGL2,IFIT1B,IFIT2,IFIT3,IFNB1,Iigp1,IL12B,IL6,IRF1,IRF7,IRGM,ISG15,ISG20,Mx2,NMI,PLA1A,PTGS2,RGS1,RSAD2,SLFN12L,SOCS1,STAT1,STAT2,TLR3,TNF,TNFSF8,TRIM21,USP25
SASH1		other	Activated	5.831	bias	6.29e-43	CCL4,CD40,CMPK2,CXCL10,Cxcl11,FGL2,IFIT1B,IFIT2,IFIT3,IFNB1,Iigp1,IL12B,IL6,IRF1,IRF7,IRGM,ISG15,ISG20,Mx2,NMI,OASL,PLA1A,PTGS2,RSAD2,SLFN12L,SOCS1,STAT1,STAT2,TLR3,TNF,TNFSF8,Trim12a,TRIM21,USP25	127 (7)
IL1A	3.264	cytokine	Activated	5.813	bias	1.48e-28	APOD,ATF3,BCL3,C3,C4A/C4B,CCL11,CCL2,Ccl2,CCL4,CCL5,CD274,CD40,CDKN1A,Clec2d (includes others),CSF3,CXCL10,CXCL12,CXCL2,FAS,FASLG,ICAM1,IL12B,IL1A,IL1B,IL1R2,IL1RN,IL6,IRF1,LCN2,MMP13,MMP3,NFKBIA,PTGS2,PTX3,Saa3,SELE,SERPINA3,TLR2,TNF,VCAM1	191 (14)
PRL		cytokine	Activated	5.803	bias	4.97e-41	B2M,CCL2,Ccl2,CD40,CD69,CDKN1A,CEBPD,CMPK2,CXCL10,CXCL2,DDX58,DHX58,DTX3L,EIF2AK2,EPSTI1,HERC6,ICAM1,ICOSLG/LOC102723996,IFI35,IFI44,IFIH1,IFIT1,IFIT3,IL1B,IL6,IRF1,IRF7,IRF9,ISG15,MFGE8,MLKL,MMP3,OAS1,OAS2,OAS3,PARP10,PARP12,PARP14,RSAD2,SAMD9L,SAMHD1,SERPINA3,SOCS1,SOCS3,SP110,STAT1,STAT2,TMEM140,TNF,TRIM14,TSC22D3,TXNIP,USP18,XAF1,XDH	229 (16)
P38 MAPK		group	Activated	5.802	bias	1.18e-24	ATF3,BATF2,BCL2A1,CCL11,CCL2,Ccl2,CCL3L3,CCL5,CCR7,CD40,CD69,CDKN1A,CEBPD,CSF3,CXCL10,CXCL12,CXCL2,CYBB,FAS,FASLG,HIF1A,ICAM1,IFNB1,IL12B,IL1A,IL1B,IL1RN,IL6,IRF7,MMP13,MMP3,NFE2L2,PLAUR,PTGS2,SELE,SGK1,SOCS3,STAT1,Tgtp1/Tgtp2,TLR2,TNF,TNFSF10,VCAM1	209 (19)
IL1		group	Activated	5.799	bias	6.53e-27	C2,C3,CCL2,Ccl2,CCL4,CCL5,CCR7,CD40,CDKN1A,CEBPD,CFB,CP,CSF2RB,CSF3,CTSC,CXCL10,CXCL2,FAS,FASLG,HIF1A,ICAM1,IFNB1,IL1B,IL1R1,IL1R2,IL1RN,IL6,IL7,IRF1,MMP13,MMP3,PTGS2,Saa3,SELE,SELL,SELP,SOCS3,TLR2,TLR7,TNF,TNFSF10,VCAM1,VCAN,XDH	187 (14)
ELAVL1		other	Activated	5.778	bias	5.61e-38	9930111J21Rik1/Gm12185,APOD,ATF3,B2M,Bst2,Cd52,CDKN1A,CENPE,Cxcl9,GBP6,Gm4951,Gvin1 (includes others),H2-K2/H2-Q9,H2-Q5,HBB,HIF1A,HLA-A,IFI16,IFI44,IFIH1,IFITM3,Iigp1,IL1R1,IL1R2,IL6,IRF1,IRF9,Irgm1,LGALS3BP,LGALS9B,MPEG1,Ms4a4c (includes others),NFKBIA,OAS1,Oas1b,OAS2,PTGS2,PTPRC,Slfn2,STAT1,Tgtp1/Tgtp2,TLR2,TNF,TP53INP1,TSC22D3,USP18,VCAM1	194 (12)
IFN alpha/beta		group	Activated	5.7	bias	6.47e-47	CCL2,CCL5,CCR7,CCRL2,CD40,CD69,CXCL10,CXCL16,Cxcl9,FGL2,H2-Q5,HLA-A,IFI16,Ifi27l2a/Ifi27l2b,IFIT2,IFIT3,IL27,IL6,IL7,IRF1,IRF7,Irgm1,Ly6a (includes others),Mx1,Mx2,RNF213,RSAD2,SOCS1,Sp100,STAT1,STAT2,Tgtp1/Tgtp2,TLR1,TLR2,TLR3,TLR7,TNFSF10,TRIM21	249 (16)
SLC15A4		transporter	Activated	5.674	bias	2.81e-30	BCL2A1,CCL2,CCL5,CD274,CXCL10,Cxcl11,DDX58,EPSTI1,GBP4,GBP5,IFI16,IFI35,IFIT1,IFIT2,IFIT3,IL1B,IL1R1,IL6,IRF7,ISG20,MSR1,Mx1,OASL,Oasl2,PLAUR,PTGS2,RGS1,SLAMF7,TAP2,TLR7,TNF,USP18,VCAM1	243 (16)
IRF5	1.371	transcription regulator	Activated	5.654	bias	2.97e-42	CCL19,CCL4,CCL5,CDKN1A,CMPK2,CXCL10,CXCL2,DDX58,DHX58,IFI44,IFIH1,IFIT1,IFIT2,IFIT3,IFITM3,IFNB1,IL12B,IL6,IRF5,IRF7,ISG15,ISG20,NAMPT,OAS1,OAS2,OASL,Oasl2,PARP12,PTGS2,RSAD2,SP110,STAT1,STAT2,TNF,TNFSF10,UBE2L6	245 (22)
CHUK		kinase	Activated	5.647	bias	2.47e-44	ACOD1,ATF3,C3,CASP4,CCL11,CCL19,CCL2,Ccl2,CCL3L3,CCL4,CCL5,CDKN1A,CEBPD,CH25H,CP,CXCL10,Cxcl11,CXCL12,CXCL13,CXCL2,FAS,GBP2,GBP4,HLA-A,ICAM1,IFI16,IFI35,IFIT1B,IFIT2,IFNB1,IL12B,IL1A,IL1B,IL1RN,IL6,ISG15,LCN2,MMP13,MMP3,NFKBIA,PTGS2,PTX3,Saa3,SELE,SGK1,Slfn2,SOCS3,TLR3,TNF,VCAM1	208 (13)
SPI1		transcription regulator	Activated	5.61	bias	1.38e-26	C3AR1,CCL4,CCR7,CD14,CDKN1A,CMPK2,CSF2RB,CXCL10,Cxcl9,CYBB,FASLG,FCGR2B,GPR84,IFI44,IFIT1,IFIT1B,IFIT2,IFIT3,IFITM3,IL12B,IL1B,IL1R2,IL1RN,IL27,IRF7,IRF9,ISG15,ISG20,NCF1,OASL,PARP12,PSMB8,PSMB9,PTGS2,PTPRC,RSAD2,SP110,TLR2,TNF,TNFSF10,USP18	242 (17)
MAVS		other	Activated	5.599	bias	2.83e-46	ALPL,Ccl2,CCL5,CFB,CMPK2,CXCL10,CXCL12,CXCL2,DDX58,DHX58,HLA-A,ICAM1,IFIH1,IFIT1,IFIT1B,IFIT2,IFIT3,IFITM3,IFNB1,IL12B,IL1A,IL1B,IL6,IRF7,ISG15,ISG20,OAS1,OAS2,OAS3,OASL,Oasl2,PARP12,PLAUR,RSAD2,SERPING1,SOCS1,SOCS3,STAT1,STAT2,TLR7,TNF,UBE2L6,USP18,ZC3HAV1	213 (16)
DDX58	4.521	enzyme	Activated	5.589	bias	6.85e-48	ALPL,CASP4,CCL2,Ccl2,CCL4,CCL5,CFB,CXCL10,CXCL12,DDX58,EIF2AK2,HLA-A,ICAM1,IFI35,IFI44,IFIH1,IFIT1,IFIT1B,IFIT2,IFIT3,IFNB1,IL1A,IL1B,IL6,IRF1,IRF7,ISG15,ISG20,Mx1,NMI,OAS1,OAS3,PLAUR,PTGS2,RSAD2,SERPING1,SOCS1,SOCS3,STAT1,STAT2,TLR3,TNF,TNFSF10,UBA7,USP18,ZC3HAV1	228 (21)
E. coli serotype 0127B8 lipopolysaccharide		chemical - endogenous non-mammalian	Activated	5.583		1.72e-30	CCL2,Ccl2,CCL5,Ccl7,CCRL2,CD14,CD40,CXCL10,CXCL12,CXCL16,CXCL2,Cxcl9,FPR2,HCAR2,Ifi47,IFNB1,IL12B,IL1B,IL6,IL7,IRF1,IRF5,LCN2,MAP3K8,MMP3,MYD88,NFKBIA,PTGS2,PTX3,RSAD2,SOCS3,STAT1,STAT2,TLR2,TLR3,TNF,UBD	239 (14)
Salmonella enterica serotype abortus equi lipopolysaccharide		chemical toxicant	Activated	5.492	bias	1.99e-24	Ccl2,CCL3L3,CCL4,CCL5,CCR7,CCRL2,CD274,CFB,CSF3,CXCL2,IFIT2,IL12B,IL1A,IL1B,IL6,IRF1,ISG15,MAFF,MAP3K8,OASL,PLA1A,PLAC8,PTGS2,PTX3,RGS1,RIN2,SFMBT2,SLAMF7,SOCS3,TIFA,TNF	205 (17)
1,1-diarylethylene-diammonium derivative		chemical reagent	Activated	5.477	bias	2.48e-39	CCL2,CDKN1A,DDX60,FAS,HERC6,ICAM1,IFI35,IFI44,IFIH1,IFIT1,IFIT2,IFIT3,IRF7,IRF9,ISG15,ISG20,NMI,OAS1,OAS2,OAS3,OASL,PARP12,PARP14,PARP9,SP110,STAT1,TAP1,TMEM140,TRIM5,UBE2L6
KLF6		transcription regulator	Activated	5.465	bias	3.62e-26	ATF3,BCL3,CASP4,CCL2,Ccl2,CCL3L3,CCL5,CD274,CDKN1A,CFB,Chil3/Chil4,CSF2RB,CXCL2,CYBB,HIF1A,ICAM1,IL12B,IL1A,IL1B,IL6,IRF1,LCP2,MMP13,MYD88,NAMPT,NFE2L2,NFKBIA,OSMR,PARP14,PTGS2,SELE,SGK1,SLAMF7,SOCS1,SOCS3,TLR1,TNF,VCAM1,VCAN	160 (15)
ITPR2		ion channel	Activated	5.441	bias	3.21e-35	ACOD1,Bst2,CCL2,Ccl2,CCL3L3,CCL4,CCL5,Ccl7,CD274,CXCL10,CXCL13,FCGR1A,GBP6,Gm12250,Gm4841,Gm4951,Ifi47,Igtp,Iigp1,IL1B,Irgm1,Ly6a (includes others),NAIP,NCF1,PSMB9,Tgtp1/Tgtp2,THEMIS2,TLR1,TLR7,TNF	138 (7)
IL5		cytokine	Activated	5.36	bias	2.47e-17	BCL3,CASP4,CCL2,CCR5,CCR7,CCRL2,CD40,CD69,CDKN1A,CSF2RB,CTSC,FAS,FCGR2B,FGL2,GBP2,GBP4,GBP7,HIF1A,ICAM1,IFNB1,IL1R2,IRF7,ITGAD,LCP2,PTPRC,Serpina3g (includes others),SGK1,SOCS1,TLR1,TNF,TNFSF8	212 (16)
cisplatin		chemical drug	Activated	5.358	bias	6.11e-15	APOBEC3B,ATF3,BCL2A1,C3,C4A/C4B,CCL2,Ccl2,CCL5,CCR5,CD14,CDKN1A,CP,CXCL10,CYBB,DDX58,FAS,FASLG,HBA1/HBA2,HEYL,HIF1A,ICAM1,IFIH1,IFNB1,IL1A,IL1B,IL6,LCN2,LILRB4,Ms4a6b,NAMPT,NCF1,NFKBIA,NMI,PLA1A,PSMB8,PTGS2,Serpina3g (includes others),SLC22A8,SOCS3,TAP1,TLR3,TNF,TNFSF10,TP53INP1,TXNIP,UGT1A6,VCAM1,XDH	212 (16)
tretinoin		chemical - endogenous mammalian	Activated	5.316	bias	1.61e-31	ALPL,APLN,APOD,ATF3,BCL2A1,BCL3,C3,C3AR1,C5AR1,CCL19,CCL2,Ccl2,CCL4,CCR5,CCRL2,CD14,CD244,CD274,CDKN1A,Chil3/Chil4,CP,CSF3,CTSC,CXCL10,CXCL2,CYBB,DDX58,DDX60,DHX58,EIF2AK2,FZD10,GBP4,Gzmb,HIF1A,HLA-A,ICAM1,IFI16,IFI35,IFI44,IFIH1,IFIT1,IFIT2,IFIT3,IL12B,IL1A,IL1B,IL1R1,IL6,IRF1,IRF9,ISG15,LCN2,LGALS3BP,Ly6a (includes others),MAP3K8,MMP13,MMP3,NCF1,NFE2L2,NMI,OAS1,OAS2,OAS3,OASL,PARP14,PARP9,PLAUR…	265 (18)
IL17A		cytokine	Activated	5.315	bias	6.01e-38	B2M,BCL2A1,BCL3,C3,CCL11,CCL2,Ccl2,CCL4,CCL5,Ccl7,CCR5,CD14,CD274,CD40,CEBPD,CSF3,CXCL10,CXCL12,CXCL13,CXCL2,Cxcl9,FAS,FASLG,GBP2,Gzmb,ICAM1,IFIT1B,IL12B,IL1A,IL1B,IL1RN,IL27,IL6,IRF1,ISG15,LCN2,MMP13,MMP3,OSMR,PTGS2,Saa3,SELE,SELP,SGK1,SOCS1,SOCS3,STAT1,Tgtp1/Tgtp2,TLR2,TLR3,TNF,VCAM1	213 (12)
TLR2	3.226	transmembrane receptor	Activated	5.305	bias	3.01e-34	ATF3,CCL2,Ccl2,CCL3L3,CCL4,CCL5,CCR5,CD40,CD69,CDKN1A,CEBPD,Chil3/Chil4,CSF3,CXCL10,CXCL2,Cxcl9,CYBB,FASLG,FPR2,Gzmb,ICAM1,IFNB1,IL12B,IL1A,IL1B,IL1RN,IL27,IL6,IRF1,MMP13,MMP3,MYD88,PTGS2,PTX3,SELE,SELP,SOCS1,SOCS3,TLR2,TNF,TNFSF10	141 (13)
SENP3		peptidase	Activated	5.282	bias	1.36e-39	Bst2,CCL3L3,CCL4,CXCL10,Cxcl9,EIF2AK2,H2-T22,HLA-A,IFI44,IFIT2,IFIT3,IL12B,IRF7,ISG15,ISG20,Mx1,MYD88,OAS2,OASL,Oasl2,PSMB9,RSAD2,SAMHD1,SP110,STAT1,TAP1,TNFSF10,XAF1	233 (19)
GIP		other	Activated	5.282	bias	6.59e-37	ATF3,CCL2,Ccl2,CCL4,CCL5,Ccl7,CXCL10,Cxcl11,CXCL2,Cxcl9,GBP2,GBP5,GBP6,Ifi47,IFIT1B,IFIT3,Iigp1,IL12B,IL1A,IL1B,IL1RN,IL6,Mx1,OASL,RSAD2,SOCS3,STX11,Tgtp1/Tgtp2,TNF	186 (17)
N-ethyl-N-nitrosourea		chemical toxicant	Activated	5.273	bias	4.19e-36	Bst2,CCL11,CCL2,CCL5,CDKN1A,CXCL13,CXCL2,Cxcl9,ICAM1,IFI35,IFI44,IFIH1,IFIT1B,IFIT2,IFIT3,IFITM3,IL1B,IRF7,ISG15,ISG20,Mx1,Mx2,OAS1,Oas1b,OAS2,Oasl2,PSMB8,TNF,TNFSF8
CNTF		cytokine	Activated	5.206		7.7e-28	APOD,ATF3,C3AR1,C5AR1,Ccl2,CCL5,CCR5,CCRL2,CD14,CD69,CEBPD,CP,CYBB,GPR65,HCAR2,IFI16,Iigp1,IL1A,IL1RN,IRF1,LCN2,MSR1,NAMPT,Oasl2,OSMR,PTGS2,SERPINA3,SLC15A3,SOCS1,SOCS3,Sp100,STAT1,TAP1,TLR2,TLR7,TNF,XDH	180 (16)
CD3		complex	Activated	5.206	bias	1.6e-20	BCL2A1,C1R,C2,CCL3L3,CCL4,CCL5,CCR5,CD274,CD69,CH25H,CXCL10,FAS,FASLG,Gzmb,H2AC18/H2AC19,HIF1A,ICAM1,IFI35,IFIT1,IL12B,IL12RB1,IL1A,IL1B,IL1R1,IL6,IRF1,IRF9,LCP1,Ly6a (includes others),MAP3K8,MSR1,NAIP,NAMPT,NFE2L2,NFKBIA,PLEK,PNP,PRF1,PTGS2,PTPRC,SOCS1,SOCS3,STAT1,TLR2,TNF,TNFSF10,TRIM5,UBE2L6,XAF1	222 (19)
TERT		enzyme	Activated	5.172	bias	6.26e-38	ATF3,B2M,Bst2,CCL11,CCL2,CCL5,CDKN1A,CTSC,CXCL10,CXCL13,CXCL2,Cxcl9,DDX58,ICAM1,IFI16,IFI35,IFI44,IFIH1,IFIT1,IFIT1B,IFIT2,IFIT3,IFITM3,IFNB1,IL1B,IL6,IRF7,ISG15,ISG20,MFGE8,MMP3,Mx1,Mx2,NFKBIA,OAS1,Oas1b,OAS2,OASL,Oasl2,PLTP,PSMB8,PTGS2,TNF,TNFSF8	236 (23)
CD40LG		cytokine	Activated	5.119	bias	6.07e-39	ASCC3,ATF3,B2M,BCL2A1,CCL19,CCL2,CCL3L3,CCL4,CCL5,CCR5,CCR7,CD40,CD69,CDKN1A,Chil3/Chil4,CTSC,CXCL10,CXCL2,CYP1B1,EIF2AK2,FAS,FASLG,FCGR2B,HIF1A,ICAM1,ICOSLG/LOC102723996,IFI44,IFIT1,IFIT2,IFIT3,IL12B,IL12RB1,IL1A,IL1B,IL27,IL6,IRF1,ISG15,NAMPT,NFKBIA,PLAUR,PLEK,PSMB8,PSMB9,PTGS2,RGS1,SELE,SELL,SELP,SOCS1,STAT1,TAP1,TAP2,TNF,TNFSF10,TNFSF8,UBD,VCAM1	212 (13)
CpG ODN 2006		chemical reagent	Activated	5.108	bias	4.38e-28	BCL2A1,CCL2,CCL5,CD274,CD40,CXCL10,DDX58,EPSTI1,GBP4,GBP5,HCK,ICAM1,IFI35,IFI44,IFIH1,IFIT1,IFIT2,IFIT3,IFNB1,IL12B,IL1B,IL6,IL7,IRF7,IRF9,ISG20,MYD88,OAS1,OASL,RSAD2,SELL,SLAMF7,STAT1,THEMIS2,TLR7,TNF,TNFSF10,TRIM5,USP18,VCAM1	225 (17)
IFNA4		cytokine	Activated	5.073	bias	7.14e-36	Bst2,CCRL2,CD274,CD69,CXCL10,GBP2,GBP5,H2-T22,HLA-E,IFIH1,IFIT1,IFIT2,IL6,Irgm1,ISG15,LILRB4,Ly6a (includes others),MAP3K8,MITD1,Mx2,OASL,PIK3AP1,RSAD2,Tgtp1/Tgtp2,TREML2,USP18,ZBP1	219 (15)
doxorubicin		chemical drug	Activated	5.069	bias	4.68e-15	APOBEC3B,ATF3,BCL2A1,C4A/C4B,CCL2,Ccl2,CD14,CD274,CD40,CDKN1A,CP,CXCL2,CYBB,FAS,FASLG,HIF1A,IL1B,IL6,IRF1,IRF5,IRF7,LCN2,LGALS3BP,Ms4a6b,NFE2L2,NFKBIA,PLA1A,PLAUR,PLTP,PSMB8,PTGS2,STAT1,TAP1,TAP2,TNF,TNFSF10,TP53INP1,XDH	217 (17)
imiquimod		chemical drug	Activated	5.065	bias	3.62e-31	Ccl2,CCL3L3,CCL4,CCL5,CCR7,CD274,CD40,CSF3,CXCL10,CXCL2,Cxcl9,Gm4841,HCK,ICAM1,IFI35,IFITM3,IFNB1,IL12B,IL1A,IL1B,IL1RN,IL6,IRF7,ISG15,ISG20,LCN2,LRG1,OAS1,OASL,PLTP,PTGS2,RNF213,RSAD2,SELL,SOCS1,SOCS3,STAT1,TARM1,TLR7,TNF,TNFSF10	215 (15)
CpG ODN 1826		chemical reagent	Activated	5.054	bias	1.41e-34	ADRA2B,Apol10a (includes others),CCL2,CCL3L3,CCL4,CCL5,CCR7,CD14,CD274,CD40,CD69,CXCL10,Cxcl9,CYBB,FCGR1A,FCGR2B,IFIT3,IFNB1,IL12B,IL1A,IL1B,IL6,IRF7,MYD88,NCF1,OAS1,OAS2,OAS3,Oasl2,PARP14,RGS1,TNF	227 (21)
trinitrobenzenesulfonic acid		chemical reagent	Activated	5.049	bias	4.68e-27	BST1,CCL11,Ccl2,CCL3L3,CCL4,CCL5,Ccl7,CCR5,CLEC4D,CLEC4E,CSF3,CXCL10,CXCL2,Cxcl9,IL12B,IL1A,IL1B,IL1R2,IL6,LCN2,MMP13,MMP3,PTGS2,PTX3,Saa3,SOCS3,TNF	244 (20)
IL33		cytokine	Activated	5.041	bias	3.21e-29	ATP10A,BCL2A1,BCL3,CCL11,CCL2,Ccl2,CCL3L3,CCL4,CCL5,Ccl7,CD40,Cd52,CD69,Chil3/Chil4,CLEC4E,CSF2RB,Ctla2a/Ctla2b,CXCL10,CXCL16,CXCL2,FAS,FGL2,FPR2,GPR65,Gvin1 (includes others),HBA1/HBA2,HCAR2,HCK,HIF1A,ICAM1,Ifitm1,IL1A,IL1B,IL1RN,IL6,IRF5,IRF7,LILRB4,MSR1,NFKBIA,PILRA,PTPRC,RGS1,SOCS3,STX11,TARM1,THEMIS2,TLR2,TNF,TNFSF10	178 (16)
hydrogen peroxide		chemical - endogenous mammalian	Activated	4.971	bias	7.26e-13	ATF3,BCL2A1,CCL2,Ccl2,CCL3L3,CCL4,CCL5,Ccl7,CCR5,CDKN1A,CSF3,FAS,FASLG,HIF1A,HSPB2,ICAM1,IFIT2,IFNB1,IL1A,IL1B,IL6,LCN2,MMP13,MMP3,MSR1,NFE2L2,PLAUR,PTGS2,PTX3,SGK1,TAP1,TNF,TP53INP1,TXNIP,VCAM1,XAF1	173 (19)
FCGR2A		transmembrane receptor	Activated	4.942	bias	2.2e-38	ACOD1,CCL2,Ccl2,CCL4,CCL5,CD40,CLEC4E,CXCL10,CXCL2,FAS,FCGR3A/FCGR3B,GBP2,GPR84,ICAM1,IFIT3,IFITM3,IL12B,IL1B,IL6,IRF7,ISG15,ISG20,Oas1b,OAS3,PTGS2,STAT1,TNF,USP18,XAF1	167 (21)
peptidoglycan		chemical - endogenous non-mammalian	Activated	4.929	bias	6.35e-32	BCL2A1,CCL2,Ccl2,CCL3L3,CCL4,CCL5,CCR5,CD274,CD40,CD69,CSF3,CXCL10,CXCL16,CXCL2,FAS,FPR2,ICAM1,IFNB1,IL12B,IL1A,IL1B,IL1RN,IL6,IRF1,MMP13,MMP3,MYD88,PTGS2,SELL,TLR2,TLR7,TNF	135 (11)
CTNNB1		transcription regulator	Activated	4.913	bias	2.13e-12	APOD,CCL2,Ccl2,CCL4,CCL5,Ccl7,CCRL2,CD274,Cd52,CDKN1A,CSF3,CXCL10,Cxcl11,CXCL12,CXCL2,Cxcl9,CYP1B1,ETV4,FAS,FASLG,HIF1A,IFI16,IFIT1,IFNB1,IL1A,IL1B,IL1R1,IL6,IL7,MFGE8,MMP13,MMP15,MMP3,MPEG1,PLAUR,PTGS2,Saa3,SERPINA3,SGK1,STAT1,STAT2,TGM1,TLR3,TNF,TNFSF10,UBQLN4,VCAM1,VCAN,XAF1	200 (14)
Tnf (family)		group	Activated	4.905	bias	6.68e-28	ATF3,BCL2A1,C3AR1,CCL2,Ccl2,CCL4,CCL5,CCR5,CCRL2,CD274,CD40,CXCL10,CXCL12,EIF2AK2,FCGR1A,GPR84,HIF1A,ICAM1,IL12B,IL1A,IL1B,IL1R1,IL1R2,IL1RN,IL6,LCN2,MMP13,NFKBIA,PTGS2,Saa3,SELE,SELL,SOCS3,TLR2,TNF,VCAM1	154 (13)
TGM2		enzyme	Activated	4.901	bias	1.12e-27	ALPL,BCL2A1,C3,C5AR1,CCL2,CCRL2,CSF3,CXCL10,CXCL12,DDX60,HIF1A,IFI35,IFIT1,IFIT2,IFIT3,IFNB1,IL1B,IL6,IRF9,OAS1,OAS2,OAS3,OASL,PARP14,PARP9,RNF213,SAMD9L,SAMHD1,SELL,SELP,SLAMF7,SLFN5,SP110,STAT1,TAP1,TNF,UBA7,XAF1	236 (24)
TNFSF11		cytokine	Activated	4.891	bias	1.72e-23	ACOD1,BCL2A1,BST1,C3AR1,CCL2,Ccl2,CCL3L3,CCL4,CCL5,Ccl7,CD14,CD40,CDKN1A,CLEC4E,CREBRF,CSF3,FAS,HCK,ICAM1,IFNB1,IL12B,IL1A,IL1B,IL1RN,IL6,NFKBIA,PLAUR,PTGS2,Saa3,Slfn2,SOCS1,SOCS3,STAT1,TLR2,TNF,USP18,VCAM1	210 (16)
cigarette smoke		chemical toxicant	Activated	4.872	bias	9.09e-18	C3,CCL2,Ccl2,CDKN1A,CXCL10,CXCL2,CYP1B1,ICAM1,IFNB1,IL1A,IL1B,IL27,IL6,MAFF,MMP3,MYD88,NFE2L2,NFKBIA,OAS1,OAS2,OAS3,OASL,Oasl2,PTGS2,SERPINA3,TNF,UGT1A6,XDH	170 (21)
STAT4		transcription regulator	Activated	4.87	bias	2.09e-18	BCL3,C3,CCL2,CCR5,Ctla2a/Ctla2b,CXCL10,CXCL2,Cxcl9,DDX58,H2AC18/H2AC19,IFIH1,IFIT1B,IFIT2,IFNB1,IL12RB1,IL6,IRF1,ISG15,ISG20,MAP3K8,Ms4a4c (includes others),Mx1,PCGF5,PLAC8,SELE,SOCS3,STAT1,TNF,Trim30a/Trim30d	237 (19)
Tlr		group	Activated	4.84	bias	1.5e-21	CASP4,CCL2,Ccl2,CCL4,CCL5,CCR7,CD40,CXCL10,FPR2,HLA-A,ICAM1,IFNB1,IL12B,IL1B,IL6,IRF1,IRF7,LCN2,NFKBIA,PTGS2,RGS1,SOCS1,SOCS3,STAT1,TNF	219 (16)
TNFSF12		cytokine	Activated	4.829		5.14e-24	BST1,CCL11,CCL19,CCL2,Ccl2,CCL3L3,CCL5,Ccl7,CCR5,CLEC4D,CLEC4E,CXCL10,Cxcl11,CXCL2,HEYL,ICAM1,IL1B,IL1R2,IL6,MMP13,MMP3,NFKBIA,PTX3,SELE,TNF,VCAM1	193 (16)
IKBKB		kinase	Activated	4.807	bias	1.17e-43	ACOD1,ATF3,C3,CCL11,CCL19,CCL2,Ccl2,CCL3L3,CCL4,CCL5,CCR7,CDKN1A,CEBPD,CH25H,CP,CXCL10,Cxcl11,CXCL12,CXCL16,CXCL2,Cxcl9,CYP1B1,FAS,FASLG,GBP2,HIF1A,HLA-A,ICAM1,IFI16,IFIT1B,IFNB1,IL12B,IL1A,IL1B,IL1RN,IL6,IRF1,ISG15,LCN2,MMP13,MMP3,MYD88,NFKBIA,PTGS2,PTX3,Saa3,SELE,SGK1,Slfn2,SOCS1,SOCS3,TLR3,TNF,TNFSF8,VCAM1,VCAN	209 (12)
LDL		complex	Activated	4.785	bias	3.58e-30	APOBEC3B,ATF3,BCL2A1,C3,CCL2,Ccl2,CCL4,CCL5,Ccl7,CCR7,CD40,CDKN1A,CXCL10,CXCL13,CXCL2,CYBB,FAS,FASLG,FCGR1A,FCGR2B,HIF1A,ICAM1,IFIT2,IFNB1,IL12B,IL1A,IL1B,IL1RN,IL6,IRF7,MMP3,MSR1,NAMPT,NCF1,PTGS2,SELE,SELP,SOCS1,SOCS3,TLR2,TNF,TNFSF10,VCAM1	177 (14)
NOS2		enzyme	Activated	4.77		1.85e-32	BCL2A1,CCL2,Ccl2,CCL3L3,CCL4,Ccl7,CD14,CDKN1A,Chil3/Chil4,CLEC4D,CP,CTSC,CXCL2,Cxcl9,FAS,FASLG,HIF1A,IFIT1B,IFIT3,IFNB1,IL12B,IL1B,IL1RN,IL6,ISG15,LCN2,LGALS3BP,LILRB4,NFKBIA,PRF1,PTGS2,Saa3,SERPINA3,SLFN12L,Slfn2,Tgtp1/Tgtp2,TNF,TNFSF10,TOR3A	188 (15)
EIF2AK2	4.616	kinase	Activated	4.763	bias	7.13e-38	AKT2,ATF3,BCL2A1,CDKN1A,CEBPD,DDX58,EIF2AK2,FAS,IFI35,IFIT1,IFIT2,IFNB1,IL1A,IL1B,IL6,IRF1,ISG15,ISG20,LGALS3BP,Mx1,NFKBIA,NMI,OAS1,OAS3,PARP12,PARP9,SAMHD1,SELE,SOCS3,SP140,STAT1,TNF,UBE2L6,USP18,ZC3HAV1	224 (18)
concanavalin a		chemical drug	Activated	4.748	bias	2.76e-26	BCL2A1,CCL11,Ccl2,CCL3L3,CCL4,CD69,CDKN1A,CSF3,CXCL10,Cxcl11,CXCL2,Cxcl9,FAS,FASLG,HIF1A,HSPB2,ICAM1,IL1B,IL1RN,IL27,IL6,IRF1,MAP3K8,PTGS2,RGS1,SOCS3,STAT1,TLR3,TNF,TNFSF10	146 (12)
IL18		cytokine	Activated	4.733	bias	1.02e-26	ATF3,CCL11,CCL2,Ccl2,CCL3L3,CCL4,CCL5,CCR5,CCR7,CCRL2,CD244,CD40,CD69,CXCL10,CXCL12,CXCL16,FAS,FASLG,FCGR3A/FCGR3B,Gzmb,ICAM1,IL12RB1,IL1A,IL1B,IL6,IRF1,MMP13,MMP15,MMP3,PRF1,PTGS2,SAMHD1,SELL,TNF,VCAM1	198 (19)
adavosertib		chemical drug	Activated	4.729	bias	2.23e-26	CFB,CXCL10,CXCL12,DDX58,DHX58,HLA-A,ICAM1,IFI35,IFIH1,IFIT1,IFIT2,IFNB1,IL1A,IL6,IRF1,IRF5,IRF7,IRF9,ISG15,ISG20,OAS1,OAS3,OASL,PLAUR,SERPING1,STAT1,TNF	255 (20)
Ige		complex	Activated	4.728	bias	6.31e-28	BCL2A1,BCL3,C3,CCL11,CCL2,Ccl2,CCL3L3,CCL4,CCL5,Ccl7,CCR5,CD40,CDKN1A,CLEC4E,CMPK2,CSF3,CXCL16,CXCL2,FAS,FCGR1A,FCGR2B,Gzmb,HBA1/HBA2,ICAM1,IL12B,IL1A,IL1B,IL6,LCP2,MAP3K8,MGST2,NFKBIA,PILRA,PTGS2,PTX3,RSAD2,SCIMP,SOCS1,SOCS3,TLR2,TLR7,TNF,TNFSF10,VCAM1	199 (18)
MAPT		other	Activated	4.716	bias	1.05e-59	ANKS4B,APOBEC1,ATF3,BC023105,BCL3,C1R,C3,C3AR1,C4A/C4B,CCL2,Ccl2,CCL3L3,CCL4,CD14,CD274,Cd52,CDKN1A,CP,CST7,CTSC,CXCL10,CXCL13,CXCL16,CXCL2,CYBB,DDX60,EPSTI1,FCGR2B,FCGR3A/FCGR3B,GBP2,GBP4,GBP5,Gm4951,HBA1/HBA2,HIF1A,HLA-A,HLA-E,ICAM1,IFI16,IFI44,IFIT1B,IFIT3,IFITM3,Igtp,Iigp1,IL1A,IL1B,IL1RN,IL6,IRF7,IRGM,Irgm1,ISG15,LCN2,LCP1,LGALS3BP,MMP13,MPEG1,Mx1,Mx2,NLRC5,OAS1,OASL,Oasl2,OSMR,PARP14,PHF11,…	255 (17)
MEF2A		transcription regulator	Activated	4.692	bias	5.88e-23	ARHGEF19,CD69,CXCL10,Cxcl11,Cxcl9,GBP2,IFI44,Ifi47,IFIT1B,IFIT2,IFIT3,IFNB1,IL12B,IL27,IRF1,IRF7,ISG20,Mx1,Mx2,NLRC5,OAS1,Oasl2,RSAD2	190 (7)
IFIH1	4.687	enzyme	Activated	4.691	bias	1.9e-37	Bst2,CCL11,CCL2,Ccl2,CCL4,CCL5,Clec2d (includes others),CXCL10,CXCL2,FAS,IFIT1,IFIT1B,IFNB1,IL12B,IL1B,IL6,IRF7,ISG15,Ly6a (includes others),Mx1,NFKBIA,OAS1,OAS2,PRF1,RSAD2,TNF,USP18,ZC3HAV1	225 (21)
CpG oligonucleotide		chemical drug	Activated	4.689	bias	1.45e-45	BCL2A1,C2,C5AR1,CASP4,Ccl2,CCL3L3,CCL4,Ccl7,CD14,CD274,CD40,CLEC4D,CLEC4E,CXCL10,CXCL2,DDX58,DDX60,FAS,FASLG,FCGR2B,GBP6,GPR84,ICAM1,ICOSLG/LOC102723996,IFIT1B,IFIT2,IFIT3,IFNB1,IL12B,IL1B,IL6,IRF7,ISG15,MMP13,MSR1,MYD88,OAS1,Oas1b,OAS2,OAS3,Oasl2,PTGS2,STAT2,TLR2,TNF,TNFSF10,Trim30a/Trim30d,ZBP1	242 (21)
IFN type 1		group	Activated	4.683	bias	1.9e-37	Bst2,Ccl2,CCL5,CD69,CXCL10,Cxcl11,CXCL13,Cxcl9,DDX58,DHX58,EIF2AK2,IFI16,IFIH1,IFIT1,IFIT1B,IFIT2,IL12B,IL27,IL6,IRF1,ISG15,Mx1,OASL,STAT1,STAT2,TNFSF10,UBA7,XDH	215 (15)
enterotoxin B		biologic drug	Activated	4.665	bias	4.72e-29	AW112010,CCL11,CCL2,Ccl2,CCL3L3,CCL4,CCL5,Ccl7,CD40,CD69,Chil3/Chil4,CSF2RB,CSF3,CXCL10,Cxcl11,CXCL12,CXCL13,CXCL2,Cxcl9,ICAM1,IL12B,IL1B,IL6,MYD88,RSAD2,SERPINA3,TNF	240 (12)
decitabine		chemical drug	Activated	4.658	bias	6.86e-11	AKT2,B2M,Ccl2,CCL5,CCR7,CD40,CDKN1A,Chil3/Chil4,CXCL10,CXCL12,CYP1B1,EIF2AK2,FAS,HLA-A,HLA-E,HLA-G,ICAM1,ICOSLG/LOC102723996,IFI16,IFI35,IFIT2,IL1B,IL6,IRF7,ISG15,MMP13,MMP3,NFKBIA,OAS1,PER2,PLCE1,PTGS2,RTP4,SELL,SGK1,SOCS1,SOCS3,STAT1,TAP2,TNF,TNFSF10,VCAN	237 (21)
PML		transcription regulator	Activated	4.613		2.25e-22	CDKN1A,DDX60,EPSTI1,FAS,Gzmb,HBB,HERC6,IFI35,IFI44,IFIH1,IFIT1,IFIT3,IL1A,IL1B,IRF7,ISG15,ISG20,MAFF,Mx1,NFE2L2,OAS1,OAS2,OAS3,PSMB8,PSMB9,STAT1,TAP1,TAP2,TNF	238 (20)
CGAS		enzyme	Activated	4.6	bias	4.02e-33	CCL5,CDKN1A,CXCL10,Cxcl9,DDX60,IFI44,IFIT1,IFIT1B,IFIT2,IFIT3,IFNB1,IL1A,IL1B,IL6,IRF7,ISG15,Mx1,Mx2,OAS1,OAS3,OASL,RSAD2,TNF,USP18	220 (19)
resiquimod		chemical drug	Activated	4.595	bias	4.05e-54	APOBEC3B,ATF3,BCL2A1,C3,C3AR1,C4A/C4B,CASP4,CCL11,CCL19,CCL2,Ccl2,CCL3L3,CCL4,CCL5,Ccl7,CCR7,CCRL2,CD40,Clec2d (includes others),CLEC4E,CSF3,CXCL10,Cxcl11,CXCL12,CXCL13,CXCL2,Cxcl9,DDX60,DHX58,EIF2AK2,FAS,FCGR1A,FCGR2B,GPR84,HCK,ICAM1,IFI16,IFIT1,IFIT2,IFIT3,IFITM3,IFNB1,IL12B,IL1A,IL1B,IL27,IL6,IL7,IRF7,IRF9,ISG15,ISG20,MYD88,NAMPT,NFE2L2,NFKBIA,NLRC5,OAS1,OAS2,OAS3,OASL,PTGS2,PTPRC,PTX3,SOCS3,S…	247 (14)
IL12 (complex)		complex	Activated	4.565	bias	2.48e-38	BCL3,CCL19,CCL2,Ccl2,CCL4,CCL5,CCR5,CCR7,CD244,CD69,Ctla2a/Ctla2b,CXCL10,Cxcl9,FAS,FASLG,Gzmb,ICAM1,IFIH1,IFIT1B,IFIT2,Iigp1,IL12B,IL12RB1,IL1B,IL27,IL6,IRF1,ISG15,ISG20,Ly6a (includes others),MAP3K8,Ms4a4c (includes others),Mx1,MYD88,PLAC8,PRF1,PTGS2,SELL,SELP,SOCS1,SOCS3,Tgtp1/Tgtp2,TLR2,TNF,Trim30a/Trim30d	225 (18)
cytokine		group	Activated	4.537	bias	1.64e-18	BCL3,C5AR1,CCL2,CCL5,CCR7,CD40,CD69,FAS,HIF1A,ICAM1,IL6,IRF1,Ly6a (includes others),MMP13,MMP3,Mx1,PLAUR,PTGS2,SELE,SELP,SGK1,SOCS1,SOCS3,TLR2,VCAM1	195 (18)
etoposide		chemical drug	Activated	4.536	bias	5.13e-15	APOBEC3B,ATF3,BCL2A1,CCL2,CCL5,CD274,CD40,CDKN1A,CXCL10,CXCL2,FAS,FASLG,HIF1A,ICAM1,IFIT2,IFNB1,IL1A,IL1B,IL6,IRF1,IRF7,PRF1,SGK1,TNF,TNFSF10	189 (15)
HMGB1		transcription regulator	Activated	4.476	bias	8.23e-19	CCL2,CCL4,CD274,CD40,CDKN1A,CXCL2,HIF1A,HLA-G,ICAM1,IFIT1,IL1A,IL1B,IL1R1,IL6,IRF5,MMP3,PTGS2,SELE,TLR2,TNF,VCAM1	157 (15)
ARHGAP21		other	Activated	4.472	bias	2.29e-25	CXCL10,Cxcl11,CXCL2,Cxcl9,FGL2,IFIT3,IFNB1,Iigp1,IRF1,IRGM,ISG20,Mx2,NMI,PLA1A,PTGS2,SLFN12L,TLR3,TNF,TNFSF8,TRIM21
5-O-mycolyl-beta-araf-(1->2)-5-O-mycolyl-alpha-araf-(1->1')-glycerol		chemical - endogenous non-mammalian	Activated	4.469	bias	5.58e-24	ATF3,BCL2A1,BCL3,CCL2,CCL3L3,CCL4,CCR7,CD40,CXCL10,CXCL2,ICAM1,IFIT1,IFIT2,IFIT3,IL1A,IL1B,NAIP,NAMPT,PTGS2,RGS1,SLAMF7,SOCS3,TNF,VCAM1	208 (13)
IL27	5.149	cytokine	Activated	4.424	bias	4.14e-34	B2M,CCL2,CCL4,CCL5,CD14,CD274,CD69,CEBPD,CXCL10,Cxcl11,Cxcl9,EIF2AK2,FAS,FASLG,GBP2,Gzmb,HLA-A,HLA-E,ICAM1,IL12B,IL1A,IL1B,IL1RN,IL6,IRF1,OAS1,PTGS2,SOCS1,SOCS3,STAT1,STAT2,TAP1,TLR3,TNF,TNFSF10,UBD,VCAM1	223 (19)
AGN194204		chemical drug	Activated	4.422	bias	3.86e-10	ATF3,BCL2A1,CCL3L3,CCL4,CDKN1A,GBP2,GPR65,Gzmb,Ifi47,IFITM3,Igtp,IL12RB1,IL1R2,IRF1,LILRB4,NGEF,PLAC8,PLIN4,TAP1,Tgtp1/Tgtp2
Ifn gamma		complex	Activated	4.415	bias	8.43e-20	CCL2,Ccl2,CCL5,CDKN1A,CXCL10,Cxcl11,CXCL16,Cxcl9,CYBB,EIF2AK2,FAS,ICAM1,IL1B,Ly6a (includes others),MYD88,SOCS1,SOCS3,STAT1,TLR3,TNF,TNFSF10,XAF1	224 (19)
lipid A		chemical toxicant	Activated	4.405	bias	2.08e-28	ACOD1,C2,C3,CCL2,Ccl2,CCL3L3,CCL5,CD14,CD40,CSF3,CXCL10,FCGR1A,FCGR2B,IFIT1B,IFNB1,IL12B,IL1B,IL6,MSR1,PTPRC,TLR3,TNF	211 (18)
F2		peptidase	Activated	4.405	bias	7.1e-11	ANGPT2,BCL3,CCL2,Ccl2,CDC42EP1,CDKN1A,CXCL10,CXCL13,CYBB,HIF1A,ICAM1,IL1B,IL6,NCF1,NFKBIA,PLAUR,PTGS2,SELE,SELP,TAP2,TNF,TNFSF10,VCAM1	149 (18)
E. coli lipopolysaccharide		chemical - endogenous non-mammalian	Activated	4.378	bias	1.72e-22	CCL2,Ccl2,CCL4,CCL5,CCR7,CD40,CEBPD,CXCL10,CXCL2,ICAM1,IFNB1,IL12B,IL1B,IL1R2,IL27,IL6,MVD,PTGS2,SELE,SOCS3,TNF,VCAM1	157 (20)
stallimycin		biologic drug	Activated	4.373	bias	1.28e-24	CXCL10,IFI16,IFI44,IFIH1,IFIT1,IFIT2,IFIT3,IFNB1,IL1A,IL1B,IL6,IL7,IRF1,IRF7,ISG15,OAS1,SP110,STAT1,TNF,TNFSF10	207 (14)
bromodeoxyuridine		chemical drug	Activated	4.373	bias	4.2e-23	CXCL10,IFI16,IFI44,IFIH1,IFIT1,IFIT2,IFIT3,IFNB1,IL1A,IL1B,IL6,IL7,IRF1,IRF7,ISG15,OAS1,SP110,STAT1,TNF,TNFSF10	211 (19)
CpG ODN 1668		chemical reagent	Activated	4.367	bias	5.45e-27	Ccl2,CCL3L3,CCL4,CD40,CD69,CSF3,CXCL10,ICAM1,IFNB1,IL12B,IL1A,IL1B,IL27,IL6,IRF7,ISG15,PTGS2,SOCS1,SOCS3,STAT1,STAT2,TLR7,TNF	214 (18)
JAK1		kinase	Activated	4.351	bias	6.46e-32	BCL3,CCL2,CCL3L3,CD14,CD40,CDKN1A,CSF3,EIF2AK2,HIF1A,HLA-A,ICAM1,IFIT2,IL1B,IL6,IRF1,IRF7,IRF9,LRG1,MAP3K8,Oasl2,OSMR,PSMB9,SOCS3,STAT1,STAT2,TAP1,TNF,USP18	216 (15)
LEP		growth factor	Activated	4.337	bias	2.67e-17	ANGPT2,BCL2A1,CCL2,Ccl2,CCL3L3,CCL5,CD14,CDKN1A,Chil3/Chil4,CSF3,CXCL10,CYBB,FAS,FASLG,HIF1A,ICAM1,IL12B,IL1A,IL1B,IL1R1,IL1R2,IL1RN,IL6,IRF1,Irgm1,MMP13,MMP3,NAMPT,NCF1,PER2,PRF1,PTGS2,Saa3,SELE,SELP,SOCS3,Tgtp1/Tgtp2,TNF,TNFSF10,VCAM1	158 (13)
FOXC1		transcription regulator	Activated	4.315	bias	6.04e-20	ALPL,B2M,GBP4,ICAM1,IFI35,IFIT1,IFIT2,IFIT3,IFITM3,IRF1,ISG15,ISG20,MMP13,OAS1,OAS2,OAS3,OASL,PSMB8,SAMHD1,SOCS3,STAT1,STAT2,TGM1,TRIM14,USP18,XAF1
JUN		transcription regulator	Activated	4.288	bias	3.98e-22	ATF3,BCL2A1,BCL3,C3,C3AR1,C5AR1,CASP4,CCL2,Ccl2,Ccl7,CD14,CD244,CD274,CDKN1A,CSF3,CXCL10,CXCL16,Cxcl9,CYP1B1,FAS,FASLG,HLA-G,HSPB2,ICAM1,IFI16,IFNB1,IL12B,IL1A,IL1B,IL27,IL6,ITGAD,MMP13,MMP3,MSR1,MVD,NAMPT,NFKBIA,PLAUR,PTGS2,PTX3,SGK1,SOCS3,STAT1,TNF,VCAM1	180 (16)
CD14	1.574	transmembrane receptor	Activated	4.264	bias	2.32e-30	BCL2A1,CCL2,Ccl2,CCL3L3,CCL4,CCL5,CXCL10,CXCL12,CXCL2,ICAM1,IFIT1,IFNB1,IL12B,IL1B,IL1R1,IL6,MSR1,PTGS2,SELE,SELP,SOCS1,SOCS3,TLR2,TNF,VCAM1	204 (14)
IFNA1/IFNA13		cytokine	Activated	4.264	bias	2.32e-30	CD274,CD40,CD69,CXCL10,DHX58,EIF2AK2,IFIH1,IFIT1,IFIT2,IL1B,IRF1,IRF7,ISG15,Mx1,OAS1,OAS2,PTGS2,RSAD2,SOCS1,STAT1,STAT2,Tgtp1/Tgtp2,TLR3,UBE2L6,ZBP1	232 (18)
cardiotoxin		chemical - other	Activated	4.264	bias	2.58e-19	APLN,B2M,C5AR1,CCL11,CCL2,Ccl2,CCL3L3,CCL4,CCL5,Ccl7,CCR5,CSF2RB,CXCL10,CXCL13,Cxcl9,FASLG,IL1A,IL1B,IL1R1,IL1RN,IL6,IL7,LCN2,LRG1,MMP13,MMP15,MMP3,NAMPT,PTPRC,Saa3,TNF
NFKB1		transcription regulator	Activated	4.258	bias	4.9e-42	B2M,BCL2A1,BCL3,CASP4,CCL11,CCL19,CCL2,Ccl2,CCL3L3,CCL4,CCL5,CD274,CD40,CDKN1A,CFB,Chil3/Chil4,CSF3,CXCL10,CXCL2,Cxcl9,CYBB,FAS,FASLG,Gzmb,ICAM1,ICOSLG/LOC102723996,IFI16,IFIT1B,IFNB1,IL12B,IL1A,IL1B,IL1RN,IL6,IRF1,ISG15,MAP3K8,MMP13,MMP3,MSR1,Mx1,NAMPT,NFKBIA,NMI,PTGS2,PTX3,RGS1,Saa3,SELE,SELP,STAT1,TLR2,TNF,TNFSF10,VCAM1	219 (15)
MRGPRX3		G-protein coupled receptor	Activated	4.243	bias	1.81e-21	ACOD1,Ccl2,CCL3L3,CCL4,CCRL2,CD274,CLEC4E,CSF3,CXCL10,Cxcl9,FPR2,HCAR2,IL1A,IL1B,IL1RN,SELL,SLFN12L,TNF
Ap1		complex	Activated	4.231	bias	6.95e-20	ATF3,BCL2A1,C3AR1,CCL2,CCL3L3,CCL4,CCL5,CD40,CXCL12,FAS,FASLG,HBB,ICAM1,IFNB1,IL12B,IL1A,IL1B,IL6,MMP13,MMP3,MSR1,PLAUR,PTGS2,SELE,SOCS1,SOCS3,TNF,VCAM1	179 (18)
C3	4.274	peptidase	Activated	4.215	bias	1.99e-25	BCL2A1,C3,C3AR1,C5AR1,CASP4,CCL2,Ccl2,CCL3L3,CCL4,CCL5,CSF3,CXCL10,CXCL16,CXCL2,IL12B,IL1A,IL1B,IL6,LCN2,PTPRC,SELL,SELP,TNF,VCAM1,ZBP1	209 (17)
NFATC2		transcription regulator	Activated	4.188	bias	1.74e-46	CASP4,Ccl2,CCL3L3,CCL5,CCR5,CCR7,CD274,CD40,CDKN1A,CMPK2,CXCL10,Cxcl11,CXCL2,Cxcl9,FAS,FASLG,FGL2,GBP4,IFIT1B,IFIT2,IFIT3,IFNB1,Iigp1,IL12B,IL1A,IL1B,IL27,IL6,IRF1,IRF7,IRGM,ISG15,ISG20,Mx2,NFKBIA,NMI,OASL,PTGS2,RGS1,RSAD2,SELE,SLFN12L,SOCS1,SOCS3,STAT1,STAT2,TLR2,TLR3,TNF,TNFSF8,USP25	243 (15)
TASL		enzyme	Activated	4.185	bias	6.69e-28	BCL2A1,CCL2,CCL5,CD274,DDX58,EPSTI1,GBP4,GBP5,IFIT1,IFIT2,IFIT3,IL6,ISG20,OASL,SLAMF7,TNF,USP18,VCAM1	174 (8)
cytarabine		chemical drug	Activated	4.183	bias	9.72e-18	APOBEC3B,CCL3L3,CCL5,CD274,CD40,CD69,CDKN1A,FAS,HLA-A,ICAM1,IFNB1,IL1B,IL6,PRF1,TLR1,TLR2,TNF,TP53INP1	221 (19)
JAK2		kinase	Activated	4.18	bias	1.42e-19	CCL2,Ccl2,CCL5,CDKN1A,CST7,CXCL10,CYBB,FCGR2B,GBP2,ICAM1,Ifitm1,IL1B,IL6,IRF1,LCN2,OSMR,PSMB9,PTGS2,Saa3,SELP,SOCS1,SOCS3,STAT1,TAP1,TNF,TP53INP1	191 (19)
HIF1A	0.981	transcription regulator	Activated	4.151	bias	2.8e-19	APLN,CCL2,Ccl2,CCL3L3,CCL4,CCL5,Ccl7,CCR5,CCR7,CCRL2,CD274,CD69,CDKN1A,CXCL10,CXCL12,CXCL2,Cxcl9,FAS,HIF1A,HIF3A,ICAM1,IFI16,IL12B,IL1A,IL1B,IL27,IL6,IL7,IRF5,MAFF,MMP13,NFKBIA,PER2,PLAC8,PLAUR,PTGS2,RAB20,SOCS3,STAT1,STAT2,TLR2,TNF,TNFSF10,TRIM21,VCAM1	190 (14)
TRAF3IP2		enzyme	Activated	4.142	bias	6.74e-20	CCL11,Ccl2,CCL5,Ccl7,CEBPD,CSF3,CXCL10,CXCL16,CXCL2,ICAM1,IFNB1,IL1B,IL6,ISG15,LCN2,MMP3,Saa3,SELP,TNF,VCAM1	188 (13)
carbon tetrachloride		chemical toxicant	Activated	4.142	bias	1.24e-08	ANGPT2,ATF3,Ccl2,CCL3L3,CCL4,CCL5,CCR5,CDKN1A,CXCL10,GBP5,ICAM1,IL1B,IL6,MMP13,MMP3,PTGS2,Sult1a1,TNF,VCAM1	199 (21)
NOD2		other	Activated	4.141	bias	1.64e-19	ACOD1,BCL2A1,CCL2,CCL5,CD40,CLEC4E,CXCL10,CXCL2,GPR84,ICAM1,IFNB1,IL12B,IL1A,IL1B,IL27,IL6,MAP3K8,NFKBIA,SOCS3,TNF	139 (17)
IKBKG		kinase	Activated	4.14	bias	2.8e-28	ACOD1,C3,Ccl2,CCL5,CEBPD,CH25H,CP,CXCL10,CXCL12,CXCL2,GBP2,HIF1A,HLA-A,ICAM1,IFI16,IFIT1B,IFNB1,IL1A,IL1B,IL1RN,IL6,IRF7,ISG15,LCN2,NFKBIA,PTX3,Saa3,SGK1,Slfn2,SOCS3,TNF,TNFSF10	208 (14)
RNY3		other	Activated	4.123	bias	7.67e-25	BATF2,CXCL10,DDX60,EPSTI1,IFI44,IFIT1,IFIT3,IFITM3,ISG15,OAS1,OAS2,OAS3,OASL,RSAD2,RTP4,SERPING1,XAF1
ITGAV		transmembrane receptor	Activated	4.123	bias	5.94e-18	Ccl2,CCL3L3,CCL4,CD14,CDKN1A,CXCL10,GBP2,HLA-A,HLA-E,ICAM1,Iigp1,IL1B,IL6,MMP13,PSMB8,Srgn,TNF	157 (19)
oblimersen		biologic drug	Activated	4.111	bias	4.19e-18	ATF3,CDKN1A,CEBPD,IFI16,IFI35,IFI44,IFIT1,IFIT3,IRF7,ISG15,MAFF,OAS1,OAS2,OASL,RSAD2,STAT1,TRIM14
JAK1/2		group	Activated	4.111	bias	5.09e-16	Bst2,CCL2,Ccl2,CD69,EIF2AK2,GBP2,GBP5,Ifi47,IL6,IRF1,IRF7,ISG15,Mx2,PLAC8,PSMB9,RSAD2,TNF	221 (16)
CREB1		transcription regulator	Activated	4.104	bias	0.000101	ATF3,CCL4,CDKN1A,CEBPD,CH25H,Chil3/Chil4,CXCL2,FGL2,H2-T22,HLA-A,HLA-G,IGSF10,IL1B,IL6,IRF7,LCN2,MMP13,MVD,PER2,PTGS2,SGK1,TNF	185 (23)
BTK		kinase	Activated	4.099	bias	9.91e-23	BCL2A1,CCL4,CCR7,CD274,CD40,CD69,CDKN1A,CXCL10,IFI35,IFIT1,IFIT3,IL12B,IL1A,IL1B,IL27,IL6,IRF1,IRF9,ISG15,ISG20,LILRB4,OAS2,OAS3,SELP,STAT1,TNF	245 (20)
CD40	2.796	transmembrane receptor	Activated	4.098	bias	2.21e-25	BCL2A1,CCL2,Ccl2,CCL4,CCL5,CD40,CD69,CDKN1A,CSF3,CXCL10,CXCL12,Cxcl9,FAS,FASLG,FCGR2B,ICAM1,ICOSLG/LOC102723996,IFNB1,IL12B,IL1A,IL1B,IL1RN,IL27,IL6,IRF1,Ly6a (includes others),MAP3K6,MMP3,NFKBIA,PRF1,PSMB9,PTGS2,SELE,SELL,SLAMF7,TAP1,TAP2,TLR2,TNF,TNFSF10,VCAM1	170 (13)
EIF4E		translation regulator	Activated	4.095	bias	5.51e-16	B2M,Bst2,C3AR1,Ccl2,CCR5,CD274,Cd52,CDKN1A,CXCL16,CYBB,GPR65,HIF1A,HLA-A,HLA-G,IFI16,Ifi27l2a/Ifi27l2b,IFIT2,IL12RB1,IL1A,LGALS3BP,MMP3,NFKBIA,PLAUR,PTPRC,TNF,UBA7	212 (21)
PARP1		enzyme	Activated	4.084	bias	1.03e-29	CASP4,Ccl2,CCL4,CCL5,CCR5,CD274,CDKN1A,CXCL10,CXCL12,CXCL13,Cxcl9,FAS,GBP2,GBP4,GBP6,GBP7,ICAM1,IFNB1,Igtp,Iigp1,IL12B,IL1B,IL6,IRGM,LGALS3BP,PTGS2,SELP,SOCS1,STAT1,Tgtp1/Tgtp2,TLR1,TNF,VCAM1	244 (18)
MAPK14		kinase	Activated	4.081	bias	6.99e-22	ATF3,CCL2,Ccl2,CCL5,Ccl7,CCR7,CD40,CEBPD,CXCL10,Cxcl11,CXCL2,Cxcl9,FAS,FASLG,ICAM1,IL12B,IL1B,IL27,IL6,MMP13,MMP3,PLAUR,PTGS2,RGS1,SGK1,Slfn1,SLFN12L,Slfn2,SOCS3,TLR2,TNF,VCAM1	170 (17)
TRAF6		enzyme	Activated	4.078	bias	1.72e-22	CCL2,Ccl2,CD274,CSF3,CXCL13,CXCL16,CXCL2,CYBB,HIF1A,ICAM1,IFNB1,IL12B,IL1B,IL6,IRF5,MMP13,NCF1,NFE2L2,SELE,SERPINA3,TNF,UBD	208 (18)
PDGF BB		complex	Activated	4.071	bias	1.5e-12	AKT2,ATF3,BCL3,C3,CASP4,CCL2,Ccl2,Ccl7,CDKN1A,CEBPD,CP,CSF3,CXCL2,GBP2,HLA-E,IL1B,IL6,MGST2,MMP3,NAMPT,PTGS2,RGS1,SERPINA3,SGK1,SOCS3,VCAM1,VCAN,XDH	205 (16)
ITGB1		transmembrane receptor	Activated	4.041		7.17e-16	CCL2,Ccl2,CCL3L3,CCL4,CD14,CDKN1A,CXCL10,GBP2,HLA-A,HLA-E,ICAM1,Iigp1,IL12B,IL1B,IL1RN,IL6,MMP13,MMP15,PLAUR,PSMB8,PTGS2,Srgn,TNF	163 (19)
Map3k7		kinase	Activated	4.039	bias	1.27e-25	Ccl2,CCL3L3,CCL4,CCL5,Ccl7,CMPK2,CXCL10,Cxcl11,CXCL2,Cxcl9,FGL2,IFIT2,IFNB1,IL1B,IL6,ISG15,ISG20,Mx2,NFKBIA,PTGS2,RSAD2,TLR3,TNF,VCAM1	212 (21)
collagenase		group	Activated	4.021	bias	6.28e-29	CCL11,Ccl2,CCL3L3,CCL4,Ccl7,CEBPD,CXCL10,CXCL12,CXCL2,ICAM1,IL1A,IL1R1,IL6,IRF1,PTX3,Saa3,SELE,SELP,TNF,VCAM1	201 (12)
aldosterone		chemical - endogenous mammalian	Activated	4.019	bias	9.02e-10	APLN,CCL2,Ccl2,CCL5,Ctla2a/Ctla2b,CYBB,FKBP5,ICAM1,IL6,LCN2,NCF1,NFKBIA,PLAUR,PTGS2,SGK1,TNF,TSC22D3,VCAM1	175 (23)
pristane		chemical toxicant	Activated	3.988	bias	1.65e-23	CCL19,Ccl2,CCL3L3,CCL5,CXCL10,ICAM1,IFI16,IL12B,IL1B,IL6,IRF5,IRF7,ISG15,Ly6a (includes others),Mx1,OAS3,Oasl2,PTGS2,TLR3,TNF	232 (15)
uric acid		chemical - endogenous mammalian	Activated	3.981		9.27e-18	CCL2,Ccl2,CCL3L3,CCL4,CCL5,CSF3,CXCL2,EIF2AK2,ICAM1,IFIT2,IFIT3,IL12B,IL1A,IL1B,IL6,IRF7,ISG15,PTGS2,RSAD2,TNF,USP18,VCAM1	205 (19)
SMARCA4		transcription regulator	Activated	3.979	bias	7.11e-07	BCL2A1,CCL11,CCL2,CCRL2,CDKN1A,CP,CUL4B,FAS,FKBP5,HBB,HLA-E,ICAM1,IFI16,IFIT1,IFITM3,IL1A,IL1B,IL6,IRF1,MAFF,MFGE8,PLAUR,PSMB9,PTX3,RGS1,TAP1,TLR2,TNFSF10,UBD	220 (19)
CCN1		other	Activated	3.95	bias	6.08e-17	C3,CCL2,Ccl2,CCL3L3,CCL4,Ccl7,CDKN1A,CXCL10,CXCL2,HIF1A,IL12B,IL1A,IL1B,IL6,MMP3,PTGS2,TLR7,TNF,TNFSF10	189 (17)
PRKCA		kinase	Activated	3.936	bias	8.25e-13	CCL2,CDKN1A,CSF3,CXCL10,CXCL2,CYBB,ICAM1,IFIT1,IFIT3,IFNB1,MMP3,NFKBIA,OASL,PTGS2,RSAD2,SELP,TNF,VCAM1	192 (21)
PI3K (complex)		complex	Activated	3.901	bias	7.14e-18	APLN,ATF3,BCL2A1,CCL2,Ccl2,CCL4,CD274,CDKN1A,CXCL10,CYBB,FASLG,HIF1A,ICAM1,IFIT1,IFNB1,IL12B,IL1B,IL1RN,IL6,LCN2,MMP13,NFE2L2,NFKBIA,PTGS2,SAMHD1,SELL,SGK1,SOCS3,TNF,TNFSF10,TXNIP,VCAM1	137 (13)
MAP3K14		kinase	Activated	3.9	bias	6.83e-15	BST1,Ccl2,CCL5,CXCL2,FAS,GBP5,ICAM1,ICOSLG/LOC102723996,IL1A,IL1B,IL1R2,IL6,NFKBIA,PTGS2,TNF,TNFSF10,VCAM1	190 (19)
Pam3-Cys		chemical toxicant	Activated	3.888	bias	1.88e-19	CCL2,CCL5,CD14,CD69,CXCL10,CXCL2,ICOSLG/LOC102723996,IFNB1,IL12B,IL1A,IL1B,IL1RN,IL6,MYD88,SELE,TLR2,TNF	200 (14)
RIPK2		kinase	Activated	3.876	bias	4.14e-14	ACOD1,Ccl2,CCL5,CD40,CD69,CLEC4E,CXCL10,CXCL2,GPR84,ICAM1,IFNB1,IL1B,IL6,SELE,TNF,VCAM1	212 (17)
trovafloxacin		chemical drug	Activated	3.873	bias	1.02e-13	B2M,CDKN1A,CXCL2,HLA-A,ICAM1,Igtp,IL6,IRF1,ISG20,MAP3K8,MMP13,MYD88,NFKBIA,SELE,SOCS3	238 (11)
mir-183		microRNA	Activated	3.86		3.27e-15	CMPK2,DDX58,DDX60,HERC6,IFIT1,IFNB1,ISG15,NMI,OAS2,RSAD2,RTP4,SLFN5,SP110,STAT1,XAF1	201 (12)
N-acetylmuramyl-L-alanyl-D-isoglutamine		chemical - endogenous non-mammalian	Activated	3.851	bias	5.17e-19	Apol10a (includes others),CCL19,CCL2,Ccl2,CCL4,CCL5,Ccl7,CD40,CXCL2,Cxcl9,ICAM1,IL12B,IL1A,IL1B,IL6,MSR1,NFKBIA,PTGS2,TNF	203 (20)
CXCL12	-0.849	cytokine	Activated	3.834	bias	2.13e-12	BCL3,CCL2,CCL5,CD14,CD69,CXCL10,CXCL12,FAS,ICAM1,IL1A,IL1B,IL6,LCP2,Ly6a (includes others),MMP13,MMP3,PTGS2,SELE,SOCS1,SOCS3,TNF,TNFSF10	193 (16)
poly dA-dT		chemical reagent	Activated	3.825	bias	1.12e-25	CCL5,CXCL10,ICAM1,IFIT2,IFNB1,IL1B,IL6,IRF7,ISG15,Mx1,NFKBIA,RSAD2,SELE,STAT1,TNF,VCAM1,ZBP1,ZC3HAV1	204 (18)
prexasertib		chemical drug	Activated	3.825	bias	4.74e-13	ATF3,BCL3,C3,CDKN1A,ICAM1,IFIH1,IFIT2,IFIT3,IL1B,IRF7,NFKBIA,PTGS2,SGK1,TNF,TXNIP	213 (20)
PRKD1		kinase	Activated	3.819	bias	2.51e-13	CCL11,Ccl2,CCL3L3,CCL4,CCL5,CXCL10,Cxcl11,CXCL2,Cxcl9,IL12B,IL1B,IL6,MMP3,TNF,VCAM1	153 (16)
D-glucose		chemical - endogenous mammalian	Activated	3.815		1.16e-09	ANGPT2,ANLN,APLN,ART3,ATF3,C3,CCL2,Ccl2,CDKN1A,CTSC,CXCL2,CYBB,FAS,GSDMD,HIF1A,ICAM1,Ifi27l2a/Ifi27l2b,IL1B,IL6,LCP1,MMP13,MMP17,MSR1,NAMPT,NCF1,NFE2L2,PLAUR,PTGS2,Saa3,SELE,SELP,SGK1,TLR2,TNF,TXNIP,VCAM1,VCAN	190 (22)
CD44		other	Activated	3.808	bias	5.87e-15	CCL19,Ccl2,CCL4,CCL5,Ccl7,CCR5,CCR7,CD274,CD69,CDKN1A,Cxcl9,FAS,FASLG,FKBP5,IL1A,IL1B,IL1R2,IL1RN,IL6,Ly6a (includes others),MMP13,MMP3,SELL,STAT2,TNF,VCAM1	212 (16)
Jnk		group	Activated	3.807	bias	8.74e-19	APLN,CCL11,CCL2,Ccl2,CCL4,CCL5,CCR7,CD40,CD69,CXCL12,FAS,FASLG,ICAM1,IFNB1,IL12B,IL1A,IL1B,IL6,MMP13,MMP3,NCF1,NFE2L2,PLAUR,PTGS2,SELE,SOCS3,TNF,VCAM1,VCAN	170 (16)
NfkB1-RelA		complex	Activated	3.804	bias	1.36e-17	CCL11,CCL2,CCL5,CSF3,ICAM1,IL12B,IL1B,IL6,LCN2,MMP13,MMP3,PTGS2,SELE,TNF,VCAM1	163 (9)
NfkB-RelA		complex	Activated	3.801	bias	6.84e-19	CCL11,CCL2,CCL5,CXCL10,HIF1A,ICAM1,IL1B,IL6,IRF1,NFKBIA,PTGS2,SELE,SOCS3,TNF,VCAM1
STAT2	2.704	transcription regulator	Activated	3.8	bias	4.63e-44	CCL19,Ccl2,CCL5,CD40,CXCL10,GBP6,IFI35,Ifi47,IFIT1,IFIT1B,IFIT2,IFIT3,Iigp1,IL6,IRF1,IRF5,IRF7,IRF9,ISG15,Mx1,OAS1,OAS2,Oasl2,PSMB8,RSAD2,RTP4,SOCS1,SOCS3,STAT1,TNF,TNFSF10,USP18,ZBP1	226 (15)
CEBPB		transcription regulator	Activated	3.794	bias	8.3e-28	APLN,BCL2A1,C2,C3,C3AR1,CCL2,Ccl2,CCL3L3,CCL4,CCL5,CCR5,CCRL2,CD14,CD274,CDKN1A,CEBPD,CENPE,CLEC4E,CP,CSF3,CTSC,CXCL10,CXCL16,CXCL2,FAS,FCGR1A,FCGR3A/FCGR3B,HBB,HLA-A,ICAM1,IFIT2,IFIT3,IFITM3,IL12B,IL1A,IL1B,IL1RN,IL6,IL7,IRF7,IRF9,LCN2,LCP2,MMP13,MMP3,MSR1,Mx1,PLAUR,PTGS2,Saa3,SGK1,SOCS3,STAT1,TNF,UGT1A6,VCAN,XDH	217 (18)
EGF		growth factor	Activated	3.787	bias	4.18e-06	ATF3,CCL2,Ccl2,CD274,CDC42EP1,CDKN1A,CEBPD,CXCL13,CXCL2,HIF1A,ICAM1,IL1B,IL1R1,IL1R2,IL6,LCN2,MMP13,MMP3,NCF1,PLAUR,PTGS2,SERPINA3,SOCS3,STAT1,TGM1,VCAM1,VCAN	205 (18)
streptozocin		chemical drug	Activated	3.778		7.72e-11	ALPL,ANGPT2,APLN,ATF3,Ccl2,CCL3L3,CCL5,CDKN1A,CXCL12,CXCL2,FAS,HIF1A,ICAM1,IL1B,IL6,MSR1,NCF1,NFE2L2,PTGS2,SELE,SELP,TNF,TXNIP,VCAM1	158 (17)
1-methyl-4-phenyl-1,2,3,6-tetrahydropyridine		chemical toxicant	Activated	3.762	bias	8.76e-11	ANLN,CCL11,Ccl2,CCL5,CYBB,FKBP5,IL1A,IL1B,IL6,MVD,PER2,PTGS2,PTPRC,SGK1,TNF	139 (21)
TLR5		transmembrane receptor	Activated	3.76	bias	1.16e-19	ATF3,CCL11,Ccl2,CCL4,CCL5,CD40,CSF3,CXCL2,ICAM1,IL12B,IL1A,IL1B,IL6,MYD88,TLR7,TNF	212 (19)
TLN1		other	Activated	3.742	bias	5.42e-19	Ccl2,CCL4,CD14,CXCL10,GBP2,HLA-A,ICAM1,Iigp1,IL1A,IL1B,IL6,MMP13,Srgn,TNF	218 (22)
PAF1		other	Activated	3.742	bias	1.34e-14	CCL3L3,CCL5,DDX58,IFI44,IFIT3,IFITM3,ISG15,ISG20,OAS2,OAS3,OASL,PLAUR,PNP,ZC3HAV1	185 (7)
CCL20		cytokine	Activated	3.719	bias	1.16e-15	C3,C3AR1,Ccl2,Chil3/Chil4,CYBB,FCGR1A,GBP5,IL1A,IL1B,IL1RN,LACC1,NCF1,Saa3,TREX1	158 (10)
mir-96		microRNA	Activated	3.719		3.51e-15	CMPK2,DDX58,DDX60,HERC6,IFIT1,IFNB1,ISG15,NMI,OAS2,RSAD2,RTP4,SLFN5,SP110,XAF1
MET		kinase	Activated	3.719	bias	5.97e-10	CCL3L3,Ccl7,CD274,CDKN1A,Cxcl11,FGL2,IFIT1B,IFNB1,IL1B,IL6,MMP13,PTGS2,SOCS3,TLR3,TNFSF8,TRIM21	200 (17)
SNCA		enzyme	Activated	3.712		3.44e-12	B2M,Bst2,CCL2,Ccl2,CCR7,Chil3/Chil4,CYBB,GBP2,GBP5,Gzmb,HIF1A,Ifi47,IL1A,IL1B,IL6,IRF1,IRF7,ISG15,MMP3,Mx2,NCF1,PLAC8,PLAUR,PRF1,PSMB9,PTGS2,RSAD2,TLR2,TNF,TSC22D3	195 (15)
PRKD		group	Activated	3.698	bias	2.04e-17	CCL11,Ccl2,CCL3L3,CCL4,CCL5,CXCL10,Cxcl11,CXCL2,Cxcl9,IL12B,IL1B,IL6,PTGS2,TNF	199 (21)
palmitic acid		chemical - endogenous mammalian	Activated	3.696	bias	3.64e-17	ATF3,CCL19,CCL2,Ccl2,CCL3L3,CCL4,CCL5,CDKN1A,CXCL10,CXCL2,CYBB,HLA-A,ICAM1,IFNB1,IL12B,IL1B,IL1RN,IL6,LCN2,MVD,NCF1,NFE2L2,NFKBIA,PROKR1,PTGS2,Saa3,SOCS3,TLR2,TNF,TNFSF10,TXNIP,VCAM1	150 (17)
SAA		group	Activated	3.665	bias	1.36e-17	CCL2,Ccl2,Chil3/Chil4,CSF3,ICAM1,IL12B,IL1B,IL1RN,IL6,MMP13,PTGS2,Saa3,TLR2,TNF,VCAM1	124 (14)
CG		complex	Activated	3.663	bias	3.96e-21	APLN,B2M,C1R,C2,C4A/C4B,CASP4,CCL2,Ccl2,Ccl7,CDKN1A,CEBPD,CFB,CUL4B,CXCL10,CXCL12,CYP1B1,EPSTI1,FAS,FASLG,FGL2,FKBP5,GBP6,HIF1A,HLA-A,HLA-E,ICAM1,IFI16,IFIT3,IL1A,IL1B,IL1R2,IL6,IL7,LGALS3BP,MMP3,MVD,Nat8f3 (includes others),Oasl2,PLAUR,PTGS2,PTX3,Saa3,SFMBT2,SOCS3,TNF,VCAM1,VCAN	200 (15)
Ccl2	7.357	cytokine	Activated	3.661	bias	1.04e-14	CCL11,Ccl2,CCL3L3,CCL4,CCL5,Ccl7,CCR5,CD14,CXCL10,CXCL2,CYBB,IL1B,IL6,TNF,VCAM1	182 (15)
TRPV4		ion channel	Activated	3.66	bias	6.78e-18	Ccl2,CCL3L3,CCL5,Ccl7,CXCL10,CXCL2,FAS,IL1B,IL6,Saa3,SOCS3,TLR2,TNF,VCAM1	179 (15)
3M-002		chemical reagent	Activated	3.648		3.91e-26	ACOD1,Apol9a/Apol9b,BCL2A1,BFSP2,CCL3L3,CCL4,CCL5,CD40,CD69,CLEC4E,CXCL10,ETV4,FCGR1A,GPR84,IFI44,IFIT1B,IL12B,IL1B,IL6,IRF7,Ms4a6c,MYD88,PHF11,PTGS2,Saa3,SLFN12L,TNF,TNFSF10,TXNIP	215 (17)
S100A9		other	Activated	3.648	bias	3.47e-24	ALPL,APLN,ATF3,BCL3,C3,CCL11,Ccl2,Ccl7,CD274,CD69,CP,CSF2RB,CXCL10,FAS,ICAM1,IFNB1,IL1B,IL6,ISG15,MMP13,MMP17,MMP3,RAB20,SGK1,SOCS3,TNF,TXNIP,UGT1A6,USP18,VCAM1,VCAN	149 (16)
CCL5	5.593	cytokine	Activated	3.627	bias	8.6e-18	C5AR1,CCL2,Ccl2,CCL3L3,CCL4,CCL5,CCR5,CCRL2,CD40,CXCL2,CYP1B1,IL1B,IL6,NAMPT,PLAUR,PNP,SGK1,STAT1,TNF	220 (18)
TCR		complex	Activated	3.617	bias	1.18e-30	APOD,BCL2A1,BCL3,CCL3L3,CCL4,CCL5,CCR5,CCR7,CD69,CXCL10,CXCL13,DDX58,DHX58,FAS,FASLG,GBP4,HIF1A,IFI44,IFIH1,IFIT1,IFIT2,IFIT3,IFNB1,IL12RB1,IL6,IL7,IRF1,IRF7,ISG15,ISG20,LCP2,MAP3K8,MYD88,NFKBIA,OAS1,OASL,PRF1,PTPRC,RSAD2,SELL,SERPINA3,SOCS1,SOCS3,STAT1,TLR3,TLR7,TNF,TSC22D3,ZC3HAV1	244 (20)
IFNE		cytokine	Activated	3.606	bias	1.7e-15	CD40,CDKN1A,CXCL10,IFIH1,IFIT2,IFITM3,ISG15,ISG20,PTGS2,STAT1,TLR3,TRIM5,USP18,ZBP1	203 (13)
CSF		group	Activated	3.606	bias	7.36e-12	BCL2A1,C3,CCL4,CCRL2,CD274,FCGR1A,GPR84,IL1A,IL1B,IL1R2,IL1RN,SOCS3,TNF
lipoteichoic acid		chemical - endogenous non-mammalian	Activated	3.6	bias	3.63e-20	CCL2,Ccl2,CCR5,CD14,CSF3,CXCL10,CYBB,HIF1A,ICAM1,IL12B,IL1B,IL1RN,IL6,MYD88,PTGS2,SELP,TLR2,TLR3,TLR7,TNF	190 (15)
SERPINE1		other	Activated	3.599		8.55e-15	CCL5,CD14,CDKN1A,CSF3,CXCL10,CXCL16,CXCL2,HBA1/HBA2,IL12B,IL6,MAP3K8,MMP3,NFKBIA,PLAUR,PRF1,TLR2,TNF,VCAM1	167 (20)
pembrolizumab		biologic drug	Activated	3.592	bias	1.4e-13	B2M,CCL4,CCL5,CD274,HLA-A,HLA-E,IFIT1,IL1B,IRF1,OAS1,PRF1,PTGS2,STAT1	167 (7)
IFI16	8.297	transcription regulator	Activated	3.584	bias	8.52e-20	CCL2,CCL4,CCL5,CDKN1A,CXCL10,DDX58,FAS,ICAM1,IFI16,IFNB1,IL1B,IL1RN,IL6,ISG15,Mx1,NFKBIA,OAS1,SELE,STAT2,TNF,VCAM1	243 (16)
PTPRJ		phosphatase	Activated	3.583	bias	3.57e-22	CCL3L3,CCL4,Ccl7,CD69,CEBPD,Cxcl11,CXCL2,FGL2,IFNB1,Iigp1,IL1A,IL6,Mx2,OASL,PLA1A,PLAUR,PTGS2,SLFN12L,TNF,TNFSF8	196 (24)
PF-4878691		chemical drug	Activated	3.561	bias	8.35e-15	CCL2,CCL4,CD40,CXCL10,IFNB1,IL12B,IL1B,IL6,ISG15,MYD88,PTGS2,STAT1,TNF	177 (7)
PTGS2	1.939	enzyme	Activated	3.545		2.79e-21	ACOD1,ANGPT2,B2M,C5AR1,CCL2,Ccl2,CCL3L3,CCL4,CCL5,CCR7,CD274,CDKN1A,CSF3,CXCL10,CXCL12,CYBB,CYP1B1,FAS,FCGR3A/FCGR3B,HLA-A,ICAM1,IFNB1,IL1B,IL6,MSR1,NFE2L2,NLRC5,PSMB8,PTGS2,SELL,TNF,TNFSF10	217 (19)
ozone		chemical toxicant	Activated	3.537	bias	7.37e-14	CCL11,Ccl2,CCL3L3,Ccl7,Chil3/Chil4,CXCL10,CXCL2,ICAM1,IL1B,IL6,NFE2L2,SOCS3,TNF	169 (15)
IL15		cytokine	Activated	3.533	bias	2.87e-27	AKT2,CCL11,CCL19,CCL2,Ccl2,CCL3L3,CCL4,CCL5,CD244,CD274,CD40,CD69,CDKN1A,CSF3,CXCL10,CXCL12,CXCL2,FAS,FASLG,FCGR3A/FCGR3B,Gzmb,H2AC18/H2AC19,HIF1A,IFI35,IFIT1,IFNB1,IL12B,IL12RB1,IL1A,IL1B,IL1R1,IL6,IRF1,ISG15,Klrk1,MYD88,NFKBIA,PLEK,PNP,PRF1,PSMB8,PSMB9,PTPRC,SELL,SOCS1,TLR2,TNF,TNFSF10,TRIM5,VCAM1	186 (13)
PLAU		peptidase	Activated	3.53	bias	2.51e-13	C5AR1,CCL2,Ccl2,CCL5,CCR5,Chil3/Chil4,FCGR1A,ICAM1,IL1B,IL6,OAS1,OAS3,PLAUR,SLFN13,TNF	232 (20)
IFNL3		cytokine	Activated	3.528	bias	2.04e-18	DDX58,IFIH1,IL12B,ISG20,Mx1,Mx2,Oas1b,RSAD2,SOCS1,STAT1,TLR2,TLR3,TNF,USP18	234 (17)
MAPKAPK2		kinase	Activated	3.524	bias	1.8e-20	CCL11,CCL2,Ccl2,CCL3L3,Ccl7,CEBPD,CXCL10,CXCL2,ICAM1,IFNB1,Iigp1,IL1B,IL6,MSR1,NFKBIA,PLA1A,TLR3,TNF,VCAM1	198 (21)
cholesterol		chemical - endogenous mammalian	Activated	3.523	bias	9.53e-14	ATF3,CCL2,Ccl2,CCL4,Ccl7,CCR5,CD14,CXCL10,CXCL2,CYBB,FASLG,FCGR2B,ICAM1,IL12B,IL1A,IL1B,IL1RN,IL6,MPEG1,PLTP,PTGS2,Saa3,SOCS3,TNF,VCAM1	148 (18)
IL-1R		group	Activated	3.519	bias	3.69e-12	CSF3,CXCL2,FAS,ICAM1,IL1A,IL1B,IL6,IL7,MMP13,MMP3,PLAUR,SELE,TNF	144 (14)
calcimycin		chemical reagent	Activated	3.508	bias	3.49e-11	ATF3,CD14,CD40,HIF1A,ICAM1,IFNB1,IL12B,IL6,LCN2,MAP3K8,MMP13,MSR1,PTGS2,TLR2,TNF,TNFSF10	202 (16)
TLR8		transmembrane receptor	Activated	3.497	bias	1.91e-13	CCL2,Ccl2,CCL4,CCR7,CD40,CXCL10,CXCL2,IFNB1,IL12B,IL1B,IL27,IL6,TNF	227 (20)
FN1		enzyme	Activated	3.494	bias	2.49e-07	CCL2,CCL4,CCL5,CDKN1A,CXCL2,IL1B,IL1R1,IL6,IL7,MMP13,MMP3,NFKBIA,PLAUR,SOCS3,TLR2,TNF	221 (20)
Immunoglobulin		complex	Activated	3.493		3.31e-94	ACOD1,ADRA2B,ANGPT2,APLN,Apol9a/Apol9b,ARRDC2,B2M,BC147527,BCL2A1,BCL3,C3,C3AR1,C5AR1,CASP4,CCL11,CCL19,CCL2,Ccl2,CCL3L3,CCL4,CCL5,Ccl7,CCR7,CD14,CD274,CD40,Cd52,CD69,CEBPD,CH25H,Chil3/Chil4,CMPK2,CSF2RB,CSF3,CST7,CUL4B,CXCL10,CXCL12,CXCL13,CXCL16,CXCL2,Cxcl9,CYP1B1,EIF2AK2,FAS,FASLG,FCGR1A,FCGR3A/FCGR3B,FGL2,FKBP5,GBP6,Gm3411 (includes others),Gzmb,HCK,HIF1A,HLA-A,HLA-E,HLA-G,ICAM1,ICOSLG/LOC102…	250 (14)
MALP-2s		chemical reagent	Activated	3.492	bias	6.63e-17	BCL2A1,CCL3L3,CCL4,CD40,CXCL2,IL12B,IL1A,IL1B,IL6,PTGS2,TARM1,TLR2,TNF	126 (12)
zymosan		chemical - endogenous non-mammalian	Activated	3.491	bias	4.95e-20	Ccl2,CCL3L3,CCL4,CCL5,CCR7,CD40,CSF3,CXCL10,CXCL12,CXCL2,FPR2,HIF1A,IL12B,IL1A,IL1B,IL6,PTGS2,SOCS1,SOCS3,TLR2,TNF	132 (14)
IL13		cytokine	Activated	3.486	bias	8.5e-22	ATF3,BCL2A1,BCL3,C3,C3AR1,CCL11,CCL2,Ccl2,CCL3L3,CCL4,CCL5,Ccl7,CCR5,CD14,CD40,Chil3/Chil4,CLEC4E,CP,CTSC,CXCL10,CXCL2,CYBB,FAS,FCGR1A,FCGR2B,FCGR3A/FCGR3B,FPR2,ICAM1,IL12B,IL1B,IL1R1,IL1R2,IL1RN,IL6,MMP13,MMP3,PTGS2,RIN2,SELP,SOCS1,SOCS3,TLR1,TNF,VCAM1	214 (17)
ribavirin		chemical drug	Activated	3.484	bias	1.88e-20	APOBEC3B,CCL3L3,Cxcl11,Cxcl9,DDX58,EIF2AK2,IFIT2,IFIT3,IL6,IRF1,IRF7,ISG15,OASL,RSAD2,STAT1,TNF,USP18	257 (18)
palbociclib		chemical drug	Activated	3.482	bias	3.11e-19	ATF3,B2M,CD274,CDKN1A,DDX58,DDX60,GBP4,HLA-A,IFI44,IFIT1,IFIT1B,IL1B,IRF5,IRF7,IRF9,ISG15,OAS1,OASL,SOCS3,TAP2,USP18	225 (20)
phytohemagglutinin		chemical drug	Activated	3.467	bias	6.81e-08	AKT2,BCL3,CCL2,CCL4,CCL5,CCR7,CD69,CXCL10,CXCL12,FAS,FASLG,ICAM1,IL1B,IL1R2,IL6,PRF1,PTPRC,STAT1,TNF,TNFSF10	188 (17)
hydroxyurea		chemical drug	Activated	3.465	bias	6.46e-16	APOBEC3B,CCL2,CCL5,CDKN1A,CSF3,CXCL2,HBB,IFIT1,IL1A,IL6,ISG20,MMP13,MMP3,NMI,OAS1,OASL,SELE,STAT1,TNF	195 (19)
lysophosphatidylinositol		chemical - endogenous mammalian	Activated	3.464	bias	6.2e-12	ANGPT2,C3,CCL2,CD274,CFB,CSF3,ICAM1,IL1A,IL1B,PLCE1,SELE,TLR3	195 (11)
reactive oxygen species		chemical toxicant	Activated	3.453	bias	1.76e-10	CCL2,CCL5,CDKN1A,CSF3,FAS,FASLG,HIF1A,IL1B,IL6,MMP3,NFE2L2,PRF1,PTGS2,TLR2,TNF,VCAM1	189 (17)
FADD		other	Activated	3.439	bias	1.97e-29	Ccl2,CDKN1A,CXCL10,Cxcl11,CXCL2,DDX58,DHX58,EIF2AK2,FAS,FASLG,ICAM1,IFIH1,IFIT1B,IFIT2,IFNB1,IL6,IRF5,IRF7,Mx1,Mx2,PSMB8,SOCS1,Sp100,STAT1,STAT2,TLR3,TNF,USP25	210 (19)
FFAR3		G-protein coupled receptor	Activated	3.43		7.03e-09	CCR7,CXCL10,Cxcl11,Cxcl9,FCGR1A,FCGR2B,GBP2,GBP6,ICAM1,IL1A,IL1B,TLR7
Lymphotoxin		complex	Activated	3.429	bias	3.97e-19	CCL19,CCL2,CCL5,CXCL10,CXCL13,ICAM1,IFNB1,IL1A,IL1B,IL6,MMP3,TNF,VCAM1	185 (16)
lysophosphatidylcholine		chemical - other	Activated	3.42	bias	9.62e-14	CCL2,Ccl2,CCL3L3,CCL5,CD274,CYBB,ICAM1,IL1B,IL6,IRF5,MVD,NAIP,PLAUR,PTGS2,SELE,TNF	214 (21)
acetaminophen		chemical drug	Activated	3.411		4.19e-12	CCL11,Ccl2,CCL3L3,CDKN1A,Chil3/Chil4,CXCL10,CXCL2,Cxcl9,CYP1B1,FAS,FASLG,HIF1A,ICAM1,IL1A,IL1B,IL6,NFE2L2,PLAUR,PTGS2,SOCS3,TLR3,TNF,VCAM1	195 (17)
S-(2,3-bispalmitoyloxypropyl)-cysteine-GDPKHPKSF		chemical reagent	Activated	3.392	bias	3.35e-16	Apol10a (includes others),CCL2,CCL4,CCL5,CD40,CXCL10,ICAM1,IL6,PTGS2,TLR1,TLR2,TNF	220 (21)
MAP2K3		kinase	Activated	3.39	bias	1.05e-14	CDKN1A,CXCL10,FASLG,ICAM1,IL12B,IL1B,IL6,IRF9,ISG15,MMP13,MMP3,PTGS2,SGK1,STAT1,TNF,TNFSF10	200 (19)
bleomycin		biologic drug	Activated	3.385	bias	3.13e-25	ANGPT2,ATF3,C3,CCL2,Ccl2,CCL3L3,CCL5,CCR5,CDKN1A,Chil3/Chil4,Clec2d (includes others),CSF2RB,CSF3,CXCL10,CXCL12,CXCL2,FAS,FASLG,HIF1A,ICAM1,Ifi27l2a/Ifi27l2b,IFIT2,IFNB1,IL1A,IL1B,IL27,IL6,IRF7,MAFF,MAP3K6,OASL,PLA1A,PTX3,RTP4,Saa3,SLFN5,SOCS3,TLR2,TNF	195 (13)
lysophosphatidic acid		chemical - other	Activated	3.363	bias	5.76e-17	AKT2,CCL11,CCL2,Ccl2,CCL4,CCL5,CD14,CXCL10,CXCL2,FKBP5,HIF1A,ICAM1,IL1B,IL6,MSR1,PLAUR,PTGS2,SOCS1,TNF,VCAM1	150 (17)
PTGER2		G-protein coupled receptor	Activated	3.36	bias	1.68e-08	CCL3L3,CCL5,CCR7,CENPE,CLEC4D,CXCL10,IL1A,IL1B,IL1R2,IL27,IL6,PTGS2,TNF	201 (21)
ARNT2		transcription regulator	Activated	3.357	bias	8.29e-07	ANGPT2,BST1,Cd52,H2-K2/H2-Q9,H2-Q5,HLA-A,ICAM1,IFI16,Iigp1,LCP1,NGEF,Sp100,TNF,TSC22D3,UGT1A6
SIM1		transcription regulator	Activated	3.357	bias	1.42e-06	ANGPT2,BST1,Cd52,H2-K2/H2-Q9,H2-Q5,HLA-A,ICAM1,IFI16,Iigp1,LCP1,NGEF,Sp100,TNF,TSC22D3,UGT1A6
semaxinib		chemical drug	Activated	3.354	bias	4.09e-22	ATF3,CCL19,Ccl2,CCL3L3,CCR5,CCR7,CSF2RB,CXCL10,CXCL13,CXCL2,Cxcl9,CYP1B1,HIF1A,IL1B,IL1R1,IL1R2,IL6,LCN2,LRG1,NFE2L2,NFKBIA,OAS3,PTGS2,PTX3,SELE,SLAMF8,SOCS3	185 (19)
REL		transcription regulator	Activated	3.349	bias	1.72e-17	ANLN,B2M,BCL2A1,BCL3,CCL2,CCL4,CD40,CDKN1A,CXCL10,Cxcl9,FAS,HLA-A,ICAM1,ICOSLG/LOC102723996,IFIT1B,IFNB1,Iigp1,IL12B,IL1B,IL27,IL6,IRF5,MAP3K8,NFE2L2,NFKBIA,PARP14,RSAD2,TNF,TNFSF10	199 (17)
CLEC7A		transmembrane receptor	Activated	3.347	bias	9.88e-15	CCL2,CCL3L3,CCL4,CCR7,CSF3,CXCL2,IL12B,IL1B,IL6,PTGS2,SOCS1,TNF	175 (15)
5-hydroxytryptamine		chemical - endogenous mammalian	Activated	3.318	bias	3.81e-07	CCL2,CYBB,CYP1B1,HIF1A,ICAM1,IL1A,IL1B,IL6,MMP13,PTGS2,TNF,VCAM1	210 (19)
emactuzumab		biologic drug	Activated	3.317	bias	9.81e-21	DHX58,GBP4,IFIT1,IFIT3,IFITM3,IRF9,ISG15,SOCS1,STAT1,STAT2,XAF1
TNK1		kinase	Activated	3.317	bias	1.12e-16	IFI16,IFIH1,IFIT1B,IFIT2,Ifitm1,IL6,IRF7,ISG20,Oas1b,OAS2,TNFSF10	203 (12)
MUC1		other	Activated	3.315	bias	9.22e-13	CD40,HIF1A,IFIH1,IFIT1B,IFIT3,Ifitm1,IFNB1,IL6,ISG15,MMP13,Mx2,NFKBIA,OASL,PNP,STAT1,TNF	225 (18)
aldesleukin		biologic drug	Activated	3.302	bias	1.33e-10	B2M,FCGR2B,FCGR3A/FCGR3B,HLA-G,IFI35,IFNB1,IRF1,IRF9,PSMB9,STAT1,TAP1
RETNLB		other	Activated	3.302	bias	4.54e-08	CCL2,Ccl2,CCL3L3,CCL5,CCR5,IL1B,IL6,MAP3K6,PLA1A,Saa3,TLR2	229 (19)
FZD9		G-protein coupled receptor	Activated	3.283	bias	1.12e-16	Ccl2,CCL5,CXCL10,IFI16,Ifi27l2a/Ifi27l2b,IFI44,IFIT1B,IRF7,ISG15,Oasl2,STAT1	168 (7)
EGR1		transcription regulator	Activated	3.271	bias	2.07e-10	ATF3,CCL2,Ccl2,CCL3L3,CCL4,Ccl7,CDKN1A,CXCL2,FAS,FASLG,HIF1A,ICAM1,IL1B,PTGS2,SGK1,SOCS1,TNF,TNFSF10,VCAM1	196 (22)
TRADD		other	Activated	3.264	bias	1.67e-13	BCL2A1,CCL2,CXCL2,ICAM1,IFNB1,IL6,IRF1,NFKBIA,TNF,UBD,VCAM1	143 (13)
IL36A		cytokine	Activated	3.258	bias	8.89e-14	Ccl7,CD40,CSF3,CXCL10,CXCL2,IL12B,IL1A,IL1B,IL6,LCN2,MMP3,TNF	124 (13)
EDN1		cytokine	Activated	3.247	bias	5.74e-10	APLN,BCL2A1,CCL2,CCR7,CYBB,HIF1A,ICAM1,IL6,MMP13,MMP3,NCF1,PLAUR,PTGS2,SELE,SELL,SOCS1,SOCS3,VCAM1,VCAN	167 (18)
2'3'-cyclic guanosine monophosphate-adenosine monophosphate		chemical - endogenous mammalian	Activated	3.24	bias	5.49e-24	CCL3L3,CCL4,CCL5,CXCL10,IFIT1,IFIT1B,IFIT2,IFNB1,IL1B,IL6,IRF7,ISG15,Mx2,OAS2,RSAD2,SOCS1,SOCS3,TNF	220 (18)
IL6R		transmembrane receptor	Activated	3.238	bias	2.13e-15	CCL2,CCL5,CDKN1A,CXCL10,CXCL2,ICAM1,IL1B,IL6,IRF1,LCN2,MMP13,MMP3,NAMPT,PTGS2,SERPINA3,SOCS3,TNF,VCAM1	192 (20)
NFkB (family)		group	Activated	3.233	bias	3.87e-14	CASP4,CCL2,CCL4,CCL5,CXCL10,CXCL12,GSDMD,IFNB1,IL1B,IL1R1,IL6,IRF1,PTGS2,TNF,TNFSF10	189 (16)
IL17F		cytokine	Activated	3.227	bias	3.63e-11	CCL2,Ccl2,CSF3,CXCL10,CXCL2,Cxcl9,ICAM1,IL6,MMP13,MMP3,PTGS2	198 (18)
ZBP1	6.082	other	Activated	3.222	bias	3.01e-15	CCL3L3,CXCL10,IFNB1,IL1B,IL6,ISG15,MLKL,Mx1,NFKBIA,OAS1,TNF	211 (20)
SP1		transcription regulator	Activated	3.22	bias	2.11e-11	ALPL,ATF3,CCL2,Ccl2,CCL5,CD40,CDKN1A,CEBPD,CXCL10,CXCL12,CYP1B1,EIF2AK2,FAS,FASLG,FPR2,HBB,HIF1A,ICAM1,IFITM3,IFNB1,IL1A,IL1B,IRF1,ITGAD,NFKBIA,PLAUR,PTGS2,SELL,SGK1,SOCS1,STAT1,TGM1,TLR2,TNF,TNFSF10	212 (24)
carrageenan		chemical drug	Activated	3.215	bias	3.37e-10	Ccl2,CCL3L3,CCL5,CXCL2,ICAM1,IL1B,IL6,NFKBIA,PTGS2,SELP,TNF	193 (16)
hemozoin		chemical - endogenous non-mammalian	Activated	3.214	bias	2.65e-13	CCL2,Ccl2,CCL3L3,CCL4,CCR5,CXCL2,ICAM1,IL1A,IL1B,IL6,TNF	157 (17)
thioacetamide		chemical toxicant	Activated	3.212	bias	2.2e-08	C4A/C4B,Ccl2,CD14,CP,CXCL16,HIF1A,IL1B,IL6,LCN2,LGALS3BP,MMP13,Ms4a6b,NFE2L2,PLA1A,PSMB8,PTGS2,STEAP3,TNF,UGT1A6	217 (20)
AHR		ligand-dependent nuclear receptor	Activated	3.211	bias	6.79e-11	CCL19,Ccl2,CCL5,CCR5,CCR7,CD14,CD274,CDKN1A,CSF2RB,CXCL10,CXCL13,CXCL2,Cxcl9,CYP1B1,FAS,FASLG,HIF1A,IL1B,IL1R1,IL1R2,IL6,IRF1,ITGAD,NFE2L2,PTGS2,PTX3,Saa3,SLAMF8,SOCS3,TNF,UGT1A6	209 (15)
cuprizone		chemical toxicant	Activated	3.209	bias	1.28e-10	ANLN,Ccl2,CCL3L3,CCL4,CCL5,Ccl7,CXCL10,EIF2AK2,IL1B,LCP1,NCF1,PTGS2,PTPRC,SERPINA3,SOCS3,TGM1,TNF	107 (7)
JAK		group	Activated	3.207	bias	1.29e-23	CCL2,CD40,CXCL10,DDX58,EIF2AK2,HIF1A,IFIH1,IFIT1,IFIT2,IFIT3,IFITM3,IL12B,IL6,ISG15,PTGS2,RSAD2,SOCS1,SOCS3,STAT1	224 (18)
BCR (complex)		complex	Activated	3.207	bias	6.58e-14	ATF3,BCL2A1,BCL3,CCL4,CCR7,CD69,CDKN1A,FAS,FCGR2B,GBP2,ICAM1,ICOSLG/LOC102723996,IL12RB1,IL1R2,IL6,IRF5,IRF7,LGALS9B,MS4A6A,NAMPT,PLEK,PTGS2,SELL,SLAMF7,STAT1,TLR7,TNFSF8,ZBP1	212 (16)
HMG20A		transcription regulator	Activated	3.207	bias	1.77e-09	ATF3,Bst2,CCL5,CXCL10,IL6,IRF7,MMP3,MVD,OSMR,PLAUR,RTP4,TLR3,VCAM1,VCAN	111 (7)
CARD9		other	Activated	3.197	bias	9.75e-23	C3,C5AR1,Ccl2,CCL5,CCR5,CLEC4E,CSF3,CXCL10,CXCL2,Cxcl9,FCGR1A,IL12B,IL1A,IL1B,IL6,TLR2,TNF	220 (18)
NFKBIA	1.461	transcription regulator	Activated	3.187		1.3e-34	ACOD1,BCL2A1,BCL3,C3,CASP4,CCL11,CCL2,Ccl2,CCL3L3,CCL5,Ccl7,CD40,CD69,CDKN1A,CEBPD,CH25H,CP,CSF3,CXCL10,CXCL12,CXCL2,CYP1B1,ERAP1,FAS,FASLG,GBP2,HIF1A,HLA-A,ICAM1,IFI16,IFIT1B,IFNB1,IL1A,IL1B,IL1RN,IL6,IRF1,ISG15,LCN2,Ly6a (includes others),MFGE8,MMP13,MMP15,MMP3,NFKBIA,PTGS2,PTX3,Saa3,SELE,SGK1,Slfn2,SOCS3,Tgtp1/Tgtp2,TLR2,TNF,TNFSF10,VCAM1	170 (15)
PF4		cytokine	Activated	3.186	bias	8.02e-23	CCL2,CCL4,CDKN1A,CMPK2,DDX58,DDX60,EPSTI1,ETV4,ICAM1,IL12B,IL1A,IL1B,IL1RN,IL6,IRF1,ISG15,NFE2L2,NFKBIA,RSAD2,STAT1,STAT2,TNF,USP18	227 (24)
SRC		kinase	Activated	3.166	bias	4.79e-06	CCL2,CDKN1A,CSF3,CXCL10,HIF1A,ICAM1,IFNB1,IL6,PLAUR,PTGS2,VCAM1	141 (17)
IL12A		cytokine	Activated	3.165	bias	3.9e-23	CCL5,CXCL10,FAS,FASLG,ICAM1,IL12B,IL12RB1,IL1A,IL1B,IL27,IL6,IRF9,SOCS1,SOCS3,STAT1,STAT2,TNF,VCAM1	214 (19)
VE-821		chemical reagent	Activated	3.162	bias	1.01e-11	CCL5,CSF3,CXCL2,IL1A,IL6,ISG20,MMP13,MMP3,OASL,TNF	175 (7)
MARK2		kinase	Activated	3.162	bias	8.54e-11	Ccl7,Cxcl11,CXCL2,IFNB1,Iigp1,IL12B,IRF1,PTGS2,RSAD2,TNF	240 (20)
TNFRSF1A		transmembrane receptor	Activated	3.16		3.83e-22	ANGPT2,CCL19,CCL2,Ccl2,CCL3L3,CCL4,CCL5,CDKN1A,CSF3,CXCL10,CXCL13,CXCL2,ICAM1,IFNB1,IL12B,IL1A,IL1B,IL6,LCN2,LGALS9B,MMP13,NFE2L2,Saa3,SELE,SELL,SELP,SOCS3,TNF,VCAM1	150 (14)
HRAS		enzyme	Activated	3.159		9.36e-11	B2M,Ccl2,CCL5,CD69,CDKN1A,CEBPD,CFB,CSF3,CTSC,CXCL10,CXCL12,CXCL2,ETV4,FAS,HIF1A,ICAM1,IL1A,IL1B,IL6,IL7,MAP3K8,MFGE8,MMP13,MMP3,NFKBIA,PER2,PLAUR,PLTP,PSMB9,PTGS2,SERPINA3,Serpina3g (includes others),SOCS3,TAP1,TAP2,TNF,VCAN	196 (15)
hyaluronic acid		chemical - endogenous mammalian	Activated	3.157	bias	4.97e-24	BCL3,Ccl2,CCL3L3,CCL4,CCL5,CCR7,CD40,CXCL10,CXCL2,Cxcl9,ICAM1,IFNB1,IL12B,IL1B,IL6,IRF5,MMP13,MMP3,MYD88,NCF1,NFKBIA,PTGS2,PTPRC,SOCS3,TLR2,TNF,VCAM1	194 (18)
thapsigargin		chemical toxicant	Activated	3.156	bias	2.72e-12	ATF3,C5AR1,Ccl2,CCL3L3,CDKN1A,CP,CXCL10,CXCL2,HIF1A,ICAM1,IFNB1,IL1B,IL1R1,IL6,NFE2L2,NFKBIA,PNP,SGK1,TLR2,TNF,TNFSF10,TXNIP,VCAM1	202 (18)
GNAQ		enzyme	Activated	3.148	bias	2.17e-11	ATF3,Ccl2,Ccl7,CXCL12,GBP2,IL1RN,IL6,MAFF,MAP3K8,OAS1,PLAUR,PTGS2,PTX3,SGK1,SOCS3,STAT1,TGM1,VCAM1	201 (16)
MAPK9		kinase	Activated	3.147	bias	1.06e-22	CCL2,Ccl2,CCL5,Ccl7,CDKN1A,Cxcl11,FAS,FASLG,FGL2,Gzmb,HIF1A,HSPB2,IFI16,IFNB1,Iigp1,IL12B,IL1B,IL6,IRF9,ISG20,LGALS3BP,MMP3,NMI,PARP14,PLA1A,PTX3,SLFN12L,TLR3,TNF,TNFSF8	205 (18)
IFNL4		cytokine	Activated	3.141	bias	1.8e-16	CXCL10,DDX58,DHX58,IFIH1,IFIT1,ISG15,OAS1,OAS2,OASL,STAT1	185 (9)
F2RL1		G-protein coupled receptor	Activated	3.133	bias	7.08e-17	ATF3,BCL3,CCL2,CXCL2,FAS,FPR2,GBP2,GBP4,GBP6,Iigp1,IL1A,IL1B,IL6,OSMR,PTGS2,SERPINA3,Serpina3g (includes others),TIFA,TNF,TXNIP	183 (17)
FOXL2		transcription regulator	Activated	3.133	bias	8.06e-09	ATF3,BCL2A1,CCL3L3,CH25H,CXCL2,FAS,ICAM1,IFNB1,IL6,MAFF,NFE2L2,PTGS2	142 (14)
laquinimod		chemical drug	Activated	3.132	bias	9.98e-06	Apol10a (includes others),Ctla2a/Ctla2b,CYP1B1,FKBP5,IL1R2,MMP13,MSR1,SLFN12L,SMIM3,UGT1A6
Fcer1		complex	Activated	3.131	bias	1.14e-11	BCL2A1,CCL2,Ccl2,CCL3L3,CCL4,CCL5,Ccl7,FCGR2B,IFIT2,IL1B,IL1RN,IL6,TNF	202 (20)
3M-011		chemical reagent	Activated	3.121	bias	4.43e-11	CCL4,CD40,CXCL10,IFNB1,IL6,ISG15,MYD88,PTGS2,STAT1,TNF	250 (20)
FOXO1		transcription regulator	Activated	3.118	bias	4.18e-14	ANGPT2,ANLN,APLN,BCL2A1,Ccl2,CCL4,CCR7,CD40,CDKN1A,CEBPD,CH25H,CXCL10,FAS,FASLG,Gzmb,HIF1A,ICAM1,IL1B,IL1R1,IL6,IRF5,LCP2,MMP3,MVD,NAMPT,PRF1,PSMB8,PTPRC,SELL,SGK1,STAT2,TNF,TNFSF10,TXNIP,VCAM1	214 (21)
HSPD1		enzyme	Activated	3.109	bias	3.13e-11	Ccl2,CXCL2,ICAM1,IL12B,IL1B,IL6,SELE,SOCS3,TNF,VCAM1	213 (21)
CD36		transmembrane receptor	Activated	3.109	bias	9.56e-09	Ccl2,CCL5,CSF3,FAS,ICAM1,IL1A,IL1B,IL6,MMP13,MMP3,PLAUR,SELP,TNF	148 (18)
TNFSF10	3.523	cytokine	Activated	3.107		1.05e-19	ANGPT2,CD14,CD274,CD69,EIF2AK2,FASLG,Gzmb,HLA-A,IFI16,IFIT1,IFNB1,IL1B,IL1RN,IL6,IRF9,ISG15,LILRB4,MMP3,NFKBIA,PTGS2,PTPRC,SELE,STAT1,TNF,TNFSF10	201 (16)
vadimezan		chemical drug	Activated	3.101	bias	1.84e-15	CCL5,CXCL10,ICAM1,IFIT1B,IFNB1,IRF1,ISG15,NFKBIA,SELE,TNF	216 (17)
PIK3R1		kinase	Activated	3.1	bias	3.76e-13	CCL4,CXCL10,CXCL12,HIF1A,ICAM1,IL12B,IL1B,IL6,IRF7,ISG15,NFE2L2,PTGS2,SELP,TNF,TXNIP,VCAM1	199 (21)
C1QA		other	Activated	3.1		1.4e-12	C3,C3AR1,C4A/C4B,C5AR1,Ccl2,CD274,CXCL10,IL6,LCN2,SERPINA3,TNF	213 (12)
paclitaxel		chemical drug	Activated	3.099		2.21e-10	ATF3,CCL2,CD274,CD40,CDKN1A,CXCL10,CXCL2,CYP1B1,FAS,HIF1A,HLA-A,ICAM1,IL1B,IL6,LCP1,LCP2,LILRB4,NFKBIA,OSMR,PLAUR,PTGS2,TAP2,TNF,TP53INP1	171 (21)
IL12B	9.759	cytokine	Activated	3.093	bias	7.88e-22	Ccl2,CCL5,CCR5,CEBPD,CXCL10,ICAM1,IL12B,IL12RB1,IL1A,IL1B,IL6,IRF9,MAP3K8,PIK3AP1,SOCS1,SOCS3,STAT1,STAT2,TNF,VCAM1	217 (19)
2,4-dinitrofluorobenzene		chemical toxicant	Activated	3.091	bias	4.18e-12	Ccl2,CCL3L3,CCL4,CXCL10,CXCL2,Cxcl9,ICAM1,IL12B,IL1B,PTGS2,TNF	252 (16)
Ca2+		chemical - endogenous mammalian	Activated	3.087	bias	5.2e-08	ATF3,CDKN1A,CEBPD,CYP1B1,FASLG,ICAM1,ICOSLG/LOC102723996,IL1B,IL6,IRF1,MMP13,MSR1,NFKBIA,PER2,PTGS2,SELP,SGK1,TGM1,TNF,VCAM1	212 (23)
NR3C2		ligand-dependent nuclear receptor	Activated	3.086		1.17e-14	BCL2A1,CCL2,Ccl2,CCL3L3,CCL5,CCR5,Chil3/Chil4,CYP1B1,FKBP5,ICAM1,IL1B,IL6,LCN2,PLIN4,PTGS2,PTX3,SERPINA3,SGK1,TNF,TSC22D3,VCAM1	222 (20)
RETN		other	Activated	3.085	bias	2.95e-09	CCL2,Ccl2,ICAM1,IL1B,IL6,PTGS2,SELE,SELP,SOCS3,TNF,VCAM1	192 (17)
SAA1		transporter	Activated	3.081	bias	8.21e-19	ALPL,CCL11,Ccl2,CCL3L3,CCL4,CCL5,Chil3/Chil4,CSF3,CXCL10,IL12B,IL1B,IL1RN,IL6,MMP13,MMP3,TNF	150 (13)
leukotriene D4		chemical - endogenous mammalian	Activated	3.074	bias	1.04e-08	ATF3,CCL2,CCL3L3,CCL4,CXCL2,IL6,MAP3K8,PTGS2,SELE,TNF	171 (24)
CXCL2	6.551	cytokine	Activated	3.073	bias	5.35e-14	Ccl2,CCL3L3,CCL4,CCL5,CXCL10,CXCL2,ICAM1,IL1B,IL6,TNF	189 (19)
gentamicin		chemical drug	Activated	3.069		3.68e-08	ALPL,APOD,ATF3,C4A/C4B,CCL2,Ccl2,CD69,CXCL10,Gm3411 (includes others),HBB,ICAM1,IL1B,IL6,IRF1,IRF7,LCN2,MLKL,PSMB8,Sult1a1,TAP1,TNF,VCAM1	158 (17)
TAC1		other	Activated	3.068	bias	6.53e-12	CCL2,Ccl2,CCL4,CXCL10,HIF1A,IFNB1,IL1A,IL1B,IL1RN,IL6,PRF1,PTGS2,SELE,SELP,TNF	150 (15)
IL12 (family)		group	Activated	3.066	bias	4.49e-14	ATF3,BCL3,CCL4,CCL5,CCR5,CD244,CD274,CD69,FASLG,FCGR3A/FCGR3B,Gzmb,IL1B,IL6,IRF1,PRF1,PTPRC,SAMHD1,SELL,STAT1,TNF,TNFSF10	215 (19)
YBX1		transcription regulator	Activated	3.064	bias	3.48e-10	Ccl2,CCL5,CDKN1A,CXCL2,HBB,HIF1A,ICAM1,IL1A,IL1B,IL6,IRF5,MMP3,NFE2L2,PLAUR,PTGS2,TRIM14	177 (20)
Brd4		kinase	Activated	3.053	bias	1.23e-09	C1R,CCR5,CFB,Cxcl9,HBA1/HBA2,IL12B,IL1A,IL6,SELE,SELL,Serpina3g (includes others),Tgtp1/Tgtp2,TNFSF10,TNFSF8	121 (10)
CEBPD	1.652	transcription regulator	Activated	3.028	bias	1.32e-10	BCL2A1,C3,Ccl2,CCL3L3,CD14,CDKN1A,CEBPD,HIF1A,IL1B,IL6,MMP13,MMP3,PTGS2,Saa3,TNF	212 (21)
PLK4		kinase	Activated	3	bias	7.93e-23	Ccl7,CD40,CMPK2,CXCL10,Cxcl11,Cxcl9,FGL2,IFIT2,IFNB1,Iigp1,IL1B,IRF1,MMP13,MMP3,Mx2,RGS1
dextran sulfate		chemical drug	Activated	2.986	bias	4.02e-25	ANLN,C3,C4A/C4B,CCL11,CCL19,Ccl2,CCL3L3,CCL4,CCL5,CD14,CD40,CD69,CDKN1A,CENPE,CSF3,CXCL10,CXCL2,Cxcl9,FZD10,ICAM1,IFIT1B,IFITM3,IL12B,IL1B,IL6,IRF7,ISG15,LCP1,MMP13,MMP3,MSR1,OSMR,PTGS2,Saa3,SELP,Slfn2,SOCS3,STEAP3,TNF,UBD,VCAM1	201 (15)
laminaran		chemical drug	Activated	2.985	bias	9.9e-09	ACOD1,CCL4,CLEC4E,CXCL10,GPR84,IL1A,IL1B,PTGS2,RSAD2	195 (14)
KITLG		growth factor	Activated	2.982	bias	1.04e-10	B2M,CCL2,Ccl2,CCL3L3,CCL4,CD14,CDKN1A,CXCL12,CXCL2,HCK,Ifi27l2a/Ifi27l2b,IL1A,IL1B,IL1RN,IL6,NFKBIA,PTGS2,SOCS1,Srgn,TNF,TSC22D3,TXNIP	202 (22)
CRKL		kinase	Activated	2.975	bias	2.01e-13	CXCL10,Cxcl11,Cxcl9,FGL2,IFNB1,Iigp1,ISG20,PLA1A,TLR3
TMEM120A		ion channel	Activated	2.971	bias	4.36e-17	IFIT1B,IFIT2,IFNB1,IL6,IRF7,ISG15,Mx1,Mx2,RSAD2	214 (14)
CFI-402257		chemical drug	Activated	2.971	bias	2.85e-09	CCL2,CXCL2,ICAM1,IL1A,IL1B,IL7,MMP13,MMP3,PLAUR	222 (15)
D-fructose		chemical - endogenous mammalian	Activated	2.971	bias	4.31e-08	Ccl2,Ccl7,CXCL10,CXCL2,ICAM1,IL1A,IL1B,IL6,TNF	208 (17)
MAP2K4		kinase	Activated	2.97	bias	1.77e-08	ATF3,CCL5,CDKN1A,CXCL10,FAS,FASLG,IL12B,IL6,PTGS2,TNF	181 (19)
PRKCD		kinase	Activated	2.969	bias	2.82e-13	BCL2A1,CCL2,Ccl2,CCL5,CDKN1A,CXCL10,CXCL12,CXCL16,ICAM1,ICOSLG/LOC102723996,IL12B,IL1B,IL1RN,IL6,MMP13,NFKBIA,OAS1,PTGS2,SOCS1,TLR2,TNF,VCAM1	195 (14)
TPH1		enzyme	Activated	2.969	bias	5.26e-06	CCR5,CD244,Gvin1 (includes others),IFI16,IL1R2,Trim12a,Trim30a/Trim30d,TRIM5,TRIM6-TRIM34
Pro-inflammatory Cytokine		group	Activated	2.961	bias	6.99e-10	CXCL13,ICAM1,IL6,LCN2,MMP3,NFE2L2,SELE,SELP,SOCS3,TLR2,UBD,VCAM1	218 (20)
OLR1		transmembrane receptor	Activated	2.961	bias	4.31e-08	CCL2,CYBB,ICAM1,IL6,MMP3,NCF1,SELP,TNF,VCAM1	152 (16)
CpG ODN 2395		chemical reagent	Activated	2.959	bias	1.09e-11	Ccl2,CCL3L3,CCL4,CD14,CD40,IL12B,IL1B,IL6,TNF	212 (17)
CYP2E1		enzyme	Activated	2.959	bias	2.95e-11	C3AR1,C5AR1,Ccl2,CD14,FGL2,IL6,NCF1,PTGS2,TNF	159 (20)
CXCL3		cytokine	Activated	2.957	bias	1.88e-12	Ccl2,CCL3L3,CCL4,CCL5,CXCL10,ICAM1,IL1B,IL6,TNF	191 (20)
CDKN2A		transcription regulator	Activated	2.954		1.06e-13	C3,CCL11,CCL19,CCL2,Ccl2,CCL3L3,CCL4,CCL5,Ccl7,CCR7,CD274,CDKN1A,CEBPD,CXCL10,Cxcl11,CXCL13,Cxcl9,FAS,IFI35,IL1A,IL1B,IL1R2,IL6,IL7,MMP3,PSMB9,PTGS2,PTX3,TNF,TP53INP1	217 (18)
CCR5	1.153	G-protein coupled receptor	Activated	2.952	bias	7.84e-16	Ccl2,CCL3L3,CCL4,CCL5,CCR5,CXCL10,CXCL12,CXCL2,FAS,FASLG,IL12B,IL1B,IL6,TNF	199 (16)
ceruletide		biologic drug	Activated	2.952	bias	3.86e-05	Ccl2,CXCL2,IL6,IRF1,PTGS2,SELP,SOCS3,TNF,TRIM5	214 (20)
5-fluorouracil		chemical drug	Activated	2.952		0.000685	APOBEC3B,ATF3,CD40,CDKN1A,FAS,FASLG,Gkn3,IL1A,IL1B,LCN2,Ly6a (includes others),PTGS2,TLR3,TXNIP,UBD	210 (21)
IL11RA		transmembrane receptor	Activated	2.95	bias	2.5e-14	CCL11,Ccl2,CCL3L3,CCL4,CCL5,Ccl7,CXCL2,HIF1A,ICAM1,IL6,MMP3,SELP,SOCS3,TNF	221 (16)
MAPKAP1		other	Activated	2.95	bias	4.54e-13	CXCL10,HIF1A,IFI16,IFIT2,Mx1,OAS2,PHF11,Slfn2,SLFN5	185 (9)
IFIT2	5.891	other	Activated	2.95	bias	9.51e-13	CCL5,EIF2AK2,IFIT1B,IFNB1,IL12B,IL1B,IL6,ISG15,TNF	234 (14)
NFATC1		transcription regulator	Activated	2.95	bias	4.13e-10	ATF3,CD40,CYBB,CYP1B1,FAS,FASLG,ICAM1,IL12B,IL1B,IL6,PTGS2,SELL,TNF,TNFSF10,VCAM1	212 (26)
phorbol esters		chemical - other	Activated	2.95	bias	1.54e-06	B2M,IL1B,IL1R1,IL6,ITGAD,MMP3,PTGS2,TGM1,TNF,TNFSF10	171 (20)
1-palmitoyl-2-(5-oxovaleroyl)-sn-glycero-3-phosphorylcholine		chemical reagent	Activated	2.949	bias	2.16e-09	BCL2A1,CCL2,ICAM1,IL1A,IL1B,IL6,PTGS2,TNF,VCAM1	146 (19)
oxazolone		chemical reagent	Activated	2.947	bias	3.33e-10	Ccl2,CXCL10,Cxcl9,ICAM1,IL12B,IL1B,IL6,TNF,VCAM1	124 (10)
monophosphoryl lipid A		chemical drug	Activated	2.946	bias	2.01e-13	Ccl2,CXCL10,IFNB1,IL12B,IL1A,IL1B,IL1RN,IL6,TNF	183 (16)
CD28		transmembrane receptor	Activated	2.945	bias	1.91e-16	BCL2A1,C2,CCL4,CCR5,CD274,CD69,CH25H,CXCL13,CXCL2,DDX58,FASLG,GBP2,H2AC18/H2AC19,IFNB1,IL12RB1,IL1B,IL1R1,IL27,IL6,IL7,IRF1,LCP1,MSR1,Mx1,NAIP,NAMPT,NFKBIA,PNP,PTGS2,SOCS1,SOCS3,TNF,TNFSF10	238 (18)
ssRNA40		chemical reagent	Activated	2.933	bias	6.31e-12	Apol10a (includes others),DDX58,IFNB1,IL12B,IL1B,IL27,IL6,SOCS3,TNF	181 (15)
TYROBP		transmembrane receptor	Activated	2.931	bias	3.46e-08	CCL2,CCR7,CD40,CD69,FCGR2B,ICAM1,IL1B,IL6,PLEK,TNF	198 (21)
Stat1 dimer		complex	Activated	2.926	bias	4.65e-11	CCL5,CXCL10,CYBB,EIF2AK2,FCGR1A,IL6,IRF1,SOCS3,TNF	196 (7)
MAP3K7		kinase	Activated	2.919	bias	1.3e-35	Ccl2,CCL5,Ccl7,CCR7,CD14,CFB,CH25H,CXCL10,CXCL2,DDX58,GBP2,IFI44,IFIH1,IFIT1,IFIT2,IFIT3,IL12B,IL1B,IL6,IRF1,IRF7,MMP13,MMP3,OAS2,OASL,PTGS2,Saa3,SELE,TNF,TNFSF10,XAF1	241 (22)
arsenic trioxide		chemical drug	Activated	2.916		0.000812	BCL2A1,CCL2,CDKN1A,FAS,FASLG,HBA1/HBA2,HIF1A,IRF1,NCF1,NFE2L2,NFKBIA,PTGS2,PTPRC,TNF	162 (19)
LTA		cytokine	Activated	2.91	bias	1.77e-08	CCL19,Ccl2,CD274,CD40,CXCL13,IL1B,IL6,PTGS2,SELL,VCAM1	202 (18)
vinblastine		chemical drug	Activated	2.907	bias	2.85e-09	CCL5,CD40,CDKN1A,HIF1A,HLA-A,IL1B,IL6,PTGS2,TNF	187 (18)
kainic acid		chemical toxicant	Activated	2.907	bias	0.00016	ATF3,Ccl2,CCL3L3,CCL5,FASLG,IL1B,IL6,LCN2,PLAUR,PTGS2,TNF	205 (17)
TBX21		transcription regulator	Activated	2.906		1.65e-10	CCL2,CCL3L3,CCL4,CCR5,CD244,CXCL10,FASLG,Gzmb,IL12RB1,Klrk1,PRF1,SELL,TNF	236 (21)
Vegf		group	Activated	2.903	bias	9.8e-14	ANGPT2,APLN,ATF3,BCL2A1,Ccl2,CD40,Ctla2a/Ctla2b,CXCL10,CXCL12,CXCL2,EMP2,FAS,FKBP5,HIF1A,ICAM1,IL12B,IL1A,IL1R1,IL6,IRF1,ISG20,LCN2,MAP3K8,MGST2,NAMPT,OSMR,PLAUR,PTGS2,PTPN5,SELE,SGK1,SOCS3,TLR3,TNF,VCAM1,XDH	145 (16)
IL17a dimer		complex	Activated	2.903	bias	2.95e-11	CCL2,CCL4,CCL5,CSF3,IL1A,IL1B,IL6,LCN2,TNF	116 (9)
MAPK7		kinase	Activated	2.9	bias	7.03e-09	BCL2A1,CXCL10,CXCL2,Cxcl9,IFNB1,IL12B,IL1A,IL1B,IL6,MVD,PTGS2,TNF	148 (14)
BAK1		other	Activated	2.897	bias	2.51e-14	CCL5,CDKN1A,CXCL10,HLA-A,Ifitm1,IFNB1,IL6,IRF7,Mx1,Oas1b,TNF,TRIM6-TRIM34	235 (24)
HAVCR1		other	Activated	2.891		4.28e-15	B2M,ERAP1,HIF1A,IL1R2,IL6,IRF1,IRF9,NAMPT,NFKBIA,PLAUR,PSMB8,PSMB9,SOCS3,STAT1,STAT2,TAP1,TAP2,TNF,XAF1	204 (11)
ITGAM		transmembrane receptor	Activated	2.882	bias	1.18e-18	BCL2A1,C5AR1,Ccl2,CCL3L3,CCL4,CCL5,CXCL10,IFNB1,IL12B,IL1B,IL6,LCN2,PTGS2,TNF,ZBP1	212 (19)
ionomycin		chemical reagent	Activated	2.878	bias	6.58e-12	BCL2A1,CCL2,CD69,CSF3,CXCL10,EIF2AK2,FAS,FASLG,FCGR1A,GBP4,Gzmb,HIF1A,ICAM1,IL12B,IL6,PRF1,PTGS2,SGK1,TLR2,TNF,TNFSF10	212 (17)
CEBPA		transcription regulator	Activated	2.875	bias	1.37e-10	ACOD1,APLN,BCL2A1,C3,C3AR1,CCL4,CD14,CDKN1A,CEBPD,CSF3,FCGR1A,GPR84,ICAM1,IL12B,IL1RN,IL6,ISG15,LCN2,Ly6a (includes others),MMP13,OAS2,PTGS2,PTPRC,PTX3,Saa3,SOCS3,TNFSF10,TSC22D3,VCAN	232 (21)
GATA2		transcription regulator	Activated	2.864		4.24e-11	ANGPT2,CCL2,Ccl2,CCL3L3,CCL5,Ccl7,CD40,CD69,CDKN1A,CLEC4E,CST7,CXCL10,CXCL12,CXCL2,CYBB,GBP2,Gm3411 (includes others),GPR141,GPR65,Gzmb,HBA1/HBA2,ICAM1,IL6,LCN2,Ly6a (includes others),SELP,TNF,UGT1A6,VCAM1	225 (24)
MOG		other	Activated	2.863	bias	1.32e-19	C5AR1,Ccl2,CCL3L3,CCL5,Ccl7,CCR5,CD274,CD40,CXCL10,Cxcl11,CXCL2,Cxcl9,ICAM1,IL27,IL6,MMP3,TNF,VCAM1	202 (14)
SMARCB1		transcription regulator	Activated	2.862	bias	0.000152	C4A/C4B,CDKN1A,CENPE,EIF2AK2,FAS,FCGR1A,IFI16,IFNB1,IL12B,IL1A,OAS1,OAS3
tetrachlorodibenzodioxin		chemical toxicant	Activated	2.851		2.05e-06	ACOD1,CCL5,CD274,Cd52,CDKN1A,CYP1B1,FAS,FASLG,IL1B,IL1R1,IL6,IRF1,MMP13,MMP15,NFE2L2,PLAUR,PTGS2,Saa3,SLC38A3,TGM1,TNF,TNFSF8,TSC22D3,UGT1A6	160 (21)
POU5F1		transcription regulator	Activated	2.85	bias	5.06e-06	BCL2A1,CCL5,CD274,CD40,CDKN1A,CXCL10,CXCL12,FAS,FASLG,GBP4,HIF1A,IL6,NAIP,Oasl2,SOCS3,TGM1,TNF,TNFSF10,TNFSF8,USP18	201 (21)
STAT5B		transcription regulator	Activated	2.844	bias	3.06e-09	CASP4,CCL3L3,CDKN1A,FAS,GBP6,H2-T22,HLA-A,Ifitm1,IFITM3,IL6,IRF1,Ly6a (includes others),Ms4a6c,Oasl2,PLTP,Serpina3g (includes others),Slfn2,SOCS1,SOCS3,TLR2,TMEM98,TNF,UBA7,UBE2L6	179 (23)
camptothecin		chemical drug	Activated	2.843		1.18e-16	AKT2,ATF3,BCL2A1,CASP4,CCL2,Ccl2,CCRL2,CD40,CDKN1A,CXCL2,FAS,FASLG,FCGR2B,FGL2,GBP2,GSDMD,HIF1A,HLA-A,HLA-E,HLA-G,ICAM1,IFI16,IFNB1,IL1A,IL1B,IL6,IRF1,LILRB4,MAFF,NFKBIA,PLAC8,PSMB9,PTGS2,PTX3,RSAD2,SELE,SELP,SOCS1,STX11,TAP1,TLR2,TNF,TP53INP1,VCAM1	189 (14)
IL7	3.678	cytokine	Activated	2.837	bias	1.5e-13	CCL2,Ccl2,CCL4,CD274,CD69,CDKN1A,CXCL2,FAS,Gzmb,IL1R1,IL6,IL7,Ly6a (includes others),MMP13,SELL,SOCS1,SOCS3,TNF,TNFSF10,TNFSF8	222 (22)
PGLYRP2		transmembrane receptor	Activated	2.828	bias	3.49e-12	CCL19,CCL2,Ccl2,CCL4,CCL5,Ccl7,CXCL2,Cxcl9	175 (15)
IFNK		cytokine	Activated	2.828	bias	2.95e-11	CD40,CXCL10,EIF2AK2,IFIH1,IRF1,OAS1,STAT1,TLR3,ZBP1	224 (19)
CHD1		enzyme	Activated	2.828	bias	1.11e-10	BCL2A1,CXCL2,ICAM1,IL1A,IL1B,IL6,PTGS2,TNF
TLR7/8		group	Activated	2.828	bias	9.9e-09	BCL2A1,CCL2,IFNB1,MAP3K8,NFKBIA,PLAUR,PTGS2,RGS1,TNF	193 (10)
Hbb-b2		other	Activated	2.828	bias	4.54e-07	Ccl2,Ccl7,CCR5,CXCL10,Cxcl9,CYBB,IL1B,TLR2	152 (7)
C5AR1	2.847	G-protein coupled receptor	Activated	2.823	bias	1.22e-12	C3,C5AR1,Ccl2,CD40,CSF3,CXCL2,FCGR1A,FCGR2B,IL12B,IL1B,IL27,IL6,SELP,TNF	230 (19)
cyclophosphamide		chemical drug	Activated	2.822	bias	1.17e-15	ATF3,B2M,C4A/C4B,CCL5,CD69,CP,CXCL2,FAS,HLA-E,ICAM1,IL12B,IL1B,IL1R2,IL6,Ly6a (includes others),PLA1A,PSMB8,PTGS2,TNF	227 (19)
cocaine		chemical drug	Activated	2.815	bias	0.00023	CCL2,Ccl2,CCR5,CXCL2,ICAM1,IFIT1,IL6,OAS1,STAT1,STAT2,TNF	225 (23)
IL-17f dimer		complex	Activated	2.813	bias	6.24e-11	CCL2,CCL4,CCL5,CSF3,IL1A,IL1B,IL6,LCN2	73 (4)
S1PR4		G-protein coupled receptor	Activated	2.813		1.88e-06	C1R,Ccl2,CSF2RB,CXCL2,IFI16,IL6,SELP,SERPING1	171 (7)
RAF1		kinase	Activated	2.811	bias	1.02e-08	CCL19,CDC42EP1,CDKN1A,FAS,HIF1A,IL12B,IL1B,IL1R1,IL6,MMP13,MMP3,OSMR,PLAUR,PNP,PTGS2,RGS1,TNF,TXNIP	169 (22)
triamterene		chemical drug	Activated	2.804	bias	9.58e-06	C4A/C4B,CD14,CP,IL6,LCN2,Ms4a6b,PLA1A,PSMB8
RNASE1		enzyme	Activated	2.8	bias	4.95e-10	CCL2,CCL4,CCL5,CXCL10,IL12B,IL6,IL7,TNF
SMAD3		transcription regulator	Activated	2.8	bias	5.59e-08	ALPL,C3,CCL2,Ccl2,CCL3L3,CCL4,CDKN1A,CXCL10,FCGR2B,FPR2,IFNB1,IL12B,IL1B,IL6,LGALS9B,Ly6a (includes others),MMP13,PTGS2,PTX3,TNF,VCAN	151 (18)
deoxycorticosterone acetate/potassium chloride/sodium chloride		chemical reagent	Activated	2.791	bias	1.63e-09	Ccl2,CCL5,CCR5,CXCL2,CYBB,IL1B,IL6,PTGS2,TNF	179 (16)
titanium dioxide		chemical drug	Activated	2.791	bias	6.88e-09	CDKN1A,Chil3/Chil4,FAS,FASLG,HCAR2,IL1B,IL6,TNF	111 (9)
galactosylceramide-alpha		chemical reagent	Activated	2.789	bias	2.3e-13	CCL11,CCL2,Ccl2,CD40,CD69,Cxcl9,FAS,FASLG,Gzmb,IL12RB1,IL1B,IL6,IRF1,TNF	224 (16)
SELP	8.206	transmembrane receptor	Activated	2.788	bias	3.31e-18	BCL2A1,BST1,CCL2,CCL3L3,CCL4,CDKN1A,CXCL2,CYP1B1,HCK,IL1B,IL1R2,IL6,PLAUR,SELP,TNF	211 (17)
CAMP		other	Activated	2.786	bias	2.06e-19	C5AR1,CCL2,Ccl2,CCL4,CCL5,Ccl7,CCR7,CXCL10,CXCL13,FPR2,ICAM1,IFNB1,IL12B,IL1A,IL1B,IL1R2,IL1RN,IL6,MYD88,PTGS2,STAT1,TLR2,TNF	196 (18)
LAMA5		other	Activated	2.781	bias	6.24e-11	Ccl2,CCL3L3,CCL4,Ccl7,CSF3,CXCL10,STAT1,TNF	117 (7)
RAC1		enzyme	Activated	2.781	bias	8.55e-08	ATF3,Ccl2,FAS,HIF1A,ICAM1,IFNB1,IL1B,IL6,MMP13,PLAUR,PTGS2,STAT1,VCAM1	170 (19)
ISGF3		complex	Activated	2.779	bias	4e-17	EIF2AK2,HIF1A,IFIH1,IFIT2,IL6,IRF1,IRF5,IRF7,ISG15,RSAD2,TNFSF10
F3		transmembrane receptor	Activated	2.774	bias	1.1e-06	CCL2,Ccl2,ICAM1,IL1B,IL6,LCP1,SELE,TNF,VCAM1	133 (17)
AIMP1		cytokine	Activated	2.771	bias	1.7e-11	CCL2,CCL4,CCL5,CXCL2,ICAM1,IL12B,IL1B,TNF	216 (20)
ECSIT		transcription regulator	Activated	2.767	bias	4.98e-09	BCL3,IL1B,IL1RN,IL6,IRF7,NFKBIA,PLAUR,PTGS2	163 (14)
FGF7		growth factor	Activated	2.767	bias	2.66e-05	CDKN1A,CEBPD,IL1A,IL7,IRF1,MMP13,NFE2L2,STAT1	178 (25)
ALB		transporter	Activated	2.765	bias	8.85e-07	CCL2,Ccl2,CCL5,CDKN1A,IL1B,IL6,PTGS2,TNF	154 (19)
CLEC4E	7.413	other	Activated	2.764	bias	3.55e-09	Ccl2,CCL3L3,CCL4,CXCL2,IL12B,IL1B,IL6,TNF	197 (17)
ATF4		transcription regulator	Activated	2.759	bias	8.91e-05	ATF3,CCL2,CDC42EP1,CDKN1A,CXCL2,IL6,OSMR,PTGS2,PTX3,SLC38A3,TNF,XDH	173 (20)
IFNA14		cytokine	Activated	2.758	bias	1.89e-10	CXCL10,IFIH1,IFIT1,IRF7,ISG15,ISG20,RSAD2,ZBP1	191 (11)
NFKBIZ		transcription regulator	Activated	2.754	bias	3.33e-10	Ccl2,CCL3L3,CEBPD,CSF3,IL12B,IL6,LCN2,MMP3,TNF	195 (16)
sodium orthovanadate		chemical reagent	Activated	2.753	bias	4.74e-08	CCL2,CDKN1A,HIF1A,IFIT2,MSR1,NFKBIA,PLAUR,TNF	168 (21)
RNASE2		enzyme	Activated	2.753	bias	7.58e-08	CCL2,CCL4,CCL5,CXCL10,IL12B,IL6,IL7,TNF	138 (14)
Growth hormone		group	Activated	2.748	bias	1.71e-09	C3,CCL5,CEBPD,CXCL2,FKBP5,HBB,ICAM1,IL1B,IL6,IRF1,NAMPT,NFKBIA,Serpina3g (includes others),SGK1,SOCS1,SOCS3,TNF,TNFSF10,TXNIP,XDH	211 (21)
FOS		transcription regulator	Activated	2.747		4.26e-13	APLN,ATF3,C3,C3AR1,CASP4,CCL2,CCL5,Ccl7,CD14,CD244,CSF3,CXCL10,CXCL16,Cxcl9,FASLG,HBA1/HBA2,ICAM1,IFI16,IFNB1,IL12B,IL1A,IL1B,IL27,IL6,LGALS3BP,MMP13,MMP3,NAMPT,NFE2L2,PLAUR,PTGS2,SOCS3,STX11,TNF,VCAM1,XAF1,XDH	196 (20)
IL24		cytokine	Activated	2.745	bias	8.85e-07	BATF2,Ccl2,EIF2AK2,FAS,FASLG,IL12B,IL27,PTGS2	183 (16)
MAPK8		kinase	Activated	2.743	bias	7.55e-12	APOD,Ccl2,CCL5,CDKN1A,CXCL16,CYBB,FASLG,IL12B,IL1B,IL6,MMP13,MMP3,MSR1,PLAUR,PTGS2,PTX3,SELE,TLR2,TNF,TSC22D3	173 (18)
S100A8		other	Activated	2.741		4.21e-28	ALPL,APLN,ATF3,BCL3,CCL11,CCL2,Ccl2,Ccl7,CD274,CD69,CP,CSF2RB,CXCL10,CXCL2,Cxcl9,FAS,ICAM1,IL1A,IL1B,IL6,ISG15,MMP13,MMP17,MMP3,NFKBIA,RAB20,Saa3,SGK1,SOCS3,TNF,TXNIP,UGT1A6,USP18,VCAM1,VCAN	197 (13)
PARP9	3.798	enzyme	Activated	2.732	bias	1.7e-16	HLA-E,IFI44,IFIT1,IFIT2,IFIT3,IFNB1,IRF1,IRF7,ISG15,OAS2,SP110,STAT1	204 (16)
BAX		transporter	Activated	2.729	bias	2.81e-11	CCL5,CDKN1A,CXCL10,HLA-A,Ifitm1,IFNB1,IL6,IRF7,Mx1,Oas1b,TNF,TRIM6-TRIM34	223 (18)
erlotinib		chemical drug	Activated	2.725	bias	1.02e-14	CCL2,CCL5,CD14,CD40,CSF3,CYBB,FAS,ICAM1,IL12B,IL1A,IL1B,IL6,MMP13,MMP3,MYD88,NFKBIA,PLAUR,TLR2,TNF	211 (15)
C5		cytokine	Activated	2.724	bias	1.33e-25	ATF3,C3AR1,C5AR1,CCL11,CCL2,Ccl2,CCL3L3,CCL4,CCL5,CSF3,CXCL10,CXCL2,CYBB,EIF2AK2,FASLG,FCGR1A,FCGR2B,ICAM1,IL12B,IL1A,IL1B,IL27,IL6,MMP3,NFE2L2,NFKBIA,SELE,TNF,VCAM1	144 (13)
MAP2K1		kinase	Activated	2.715	bias	2.47e-10	ATF3,BCL2A1,CCL2,CCL3L3,CCL4,CCL5,CD274,CDKN1A,FASLG,HIF1A,IL1A,IL6,MMP13,MMP3,NFKBIA,PLAUR,PTGS2,TNF,TNFSF10	162 (16)
IFNAR2		transmembrane receptor	Activated	2.714	bias	6.41e-23	CXCL10,DDX58,GBP4,IFI44,IFIH1,IL6,ISG15,Mx1,OAS1,OAS2,PSMB8,PSMB9,TLR3,TNFSF10,UBA7,UBD,UBE2L6,USP18,XAF1	240 (16)
lipoarabinomannan		chemical - endogenous non-mammalian	Activated	2.714	bias	1.7e-16	CCL4,CCR5,CD14,CXCL2,ICAM1,IFNB1,IL1B,IRF1,SELE,STAT1,Tgtp1/Tgtp2,TNF	233 (20)
nickel chloride		chemical toxicant	Activated	2.714	bias	3.69e-06	CCL2,HIF1A,IL1B,IL6,MAFF,NFE2L2,PTGS2,TNF	155 (18)
SMPD1		enzyme	Activated	2.712	bias	7.86e-10	CCL2,CCL4,CCL5,CCRL2,CSF3,CXCL2,IL6,MYD88,TLR2,TNF,TNFSF10	200 (14)
Fibrinogen		complex	Activated	2.71	bias	3.97e-19	BCL3,CCL2,Ccl2,CCL3L3,CCL4,CD40,FCGR3A/FCGR3B,ICAM1,IL1B,IL6,SELP,TLR2,TNF	207 (18)
chitin		chemical - endogenous non-mammalian	Activated	2.709	bias	3.11e-10	CCL11,Ccl2,CCL5,CD274,Chil3/Chil4,IL1B,IL6,TNF
IL17RA		transmembrane receptor	Activated	2.707	bias	5.61e-17	CCL11,Ccl2,CSF3,CXCL12,CXCL2,IFNB1,IL1A,IL1B,IL6,MMP13,MMP3,SELE,SELP,TNF	190 (15)
SELPLG		other	Activated	2.704	bias	1.46e-12	BCL2A1,BST1,CCL2,CCL4,CDKN1A,CXCL2,CYP1B1,HCK,IL1B,IL1R2,PLAUR,TNF	177 (18)
homocysteine		chemical - endogenous mammalian	Activated	2.698		1.95e-10	ATF3,CCL2,Ccl2,CCL5,CDKN1A,CXCL10,CXCL12,HCAR2,IL1B,IL6,MMP13,PTGS2,Saa3,SOCS3,VCAM1	138 (15)
CASP4	3.969	peptidase	Activated	2.687	bias	4.92e-17	CASP4,CCL2,CCL3L3,CD14,CXCL12,CXCL16,CXCL2,GSDMD,IFNB1,IL1A,IL1B,LCN2,PLAC8,TARM1,TNFSF8	183 (20)
CRH		cytokine	Activated	2.686	bias	1.8e-05	FASLG,IL1B,IL1RN,IL6,PTGS2,SGK1,SOCS3,TNF	205 (20)
CD2		transmembrane receptor	Activated	2.683	bias	7.99e-10	CCL11,CCR7,CD40,FAS,FASLG,ICAM1,PTPRC,SELL,STAT1,TNF	200 (21)
gemcitabine		chemical drug	Activated	2.678	bias	7.36e-07	APOBEC3B,Ccl2,CD274,CDKN1A,CXCL12,FAS,FASLG,HIF1A,IL1B,PTGS2	141 (15)
FAS	2.064	transmembrane receptor	Activated	2.674		1.27e-16	AKT2,BCL2A1,CCL2,Ccl2,CCL3L3,CCL4,CCL5,CCRL2,CDKN1A,CEBPD,CXCL10,CXCL2,Cxcl9,FAS,FASLG,FCGR2B,FGL2,GBP2,ICAM1,IFIT1,IL1A,IL1B,IL6,IRF1,LILRB4,MMP13,NFKBIA,PTX3,RSAD2,SELP,TLR2,TNF,TNFSF10,VCAM1	198 (12)
PLK2		kinase	Activated	2.673	bias	2.65e-19	Ccl7,CD40,CMPK2,CXCL10,Cxcl11,Cxcl9,FGL2,IFIT2,IFNB1,Iigp1,IL1B,IRF1,Mx2,RGS1
3-deoxy-2-octulosonic acid(2)-lipid A		chemical - endogenous non-mammalian	Activated	2.646	bias	3.27e-09	Ccl2,CH25H,CXCL10,IFIT1B,IL1B,IL6,PTGS2	198 (15)
P2RX4		ion channel	Activated	2.646	bias	3.27e-09	Ccl2,CXCL2,ICAM1,IL1B,IL6,MMP3,TNF	161 (15)
KCNJ10		ion channel	Activated	2.646	bias	1.25e-08	Ccl2,CXCL10,Cxcl9,GBP5,GBP6,ICAM1,TGM1
MST1R		kinase	Activated	2.646	bias	1.26e-08	CCL3L3,CCL4,CCL5,Cxcl11,CXCL13,ICAM1,IL27,TNF	188 (20)
SOCS2		other	Activated	2.646	bias	5.3e-08	CCL4,CD40,CXCL10,IFNB1,IL1B,IL6,TNF	175 (18)
gentamicin C		chemical drug	Activated	2.646	bias	5.61e-05	C4A/C4B,CD14,CP,LCN2,Ms4a6b,PLA1A,PSMB8
ELOVL3		enzyme	Activated	2.646		0.00011	C3AR1,CYBB,IFI16,MSR1,MVD,SLAMF7,Trim12a
MAP2K1/2		group	Activated	2.646	bias	0.000215	ATF3,C3,Ccl2,CCL3L3,CCL4,IL1B,TNF	185 (20)
DPP4		peptidase	Activated	2.644	bias	4.98e-15	Ccl2,CCL3L3,CCL5,CSF3,CXCL10,CXCL2,Cxcl9,IL12B,IL1A,IL1B,IL1RN,IL6,Mx1,TNF	177 (16)
leukotriene C4		chemical - endogenous mammalian	Activated	2.639	bias	3.27e-09	CCL2,CCL4,ICAM1,PTGS2,SELP,TNF,VCAM1	191 (19)
fulvestrant		chemical drug	Activated	2.636		1.13e-07	ASCC3,C3,CASP4,CCL2,Ccl2,CCL5,CDKN1A,CEBPD,CXCL10,CXCL12,ICAM1,IL1B,IRF1,PTGS2,SELP,TNF,TSC22D3,TXNIP,VCAM1	220 (22)
OGA		enzyme	Activated	2.632		4.95e-08	APOBEC1,C3AR1,CCL2,Ccl2,CCL3L3,CCR5,CD14,CD40,CDKN1A,CH25H,CSF2RB,CXCL16,FAS,FZD10,IFIT3,NGEF,PLCE1,PRF1,Saa3,SLFN12L,SOCS1,SOCS3,STAT1,STAT2	163 (16)
nystatin		chemical drug	Activated	2.63	bias	1.7e-11	CCL3L3,CD40,ICAM1,IL12B,IL1B,IL6,LCN2,TNF	157 (18)
IFNL2		other	Activated	2.63	bias	1.11e-09	CCR5,CXCL10,Cxcl11,Cxcl9,IFIT1,IRF7,RSAD2	209 (13)
TNFSF9		cytokine	Activated	2.63	bias	2.68e-08	CCR7,CD14,ICAM1,IL6,PTPRC,TNF,VCAM1	225 (15)
MAOA		enzyme	Activated	2.63	bias	7.22e-07	CCL2,CCL5,CEBPD,IL1A,IL1B,IL6,SOCS3	226 (18)
CSF1R		kinase	Activated	2.63	bias	4.51e-06	CCL3L3,CDKN1A,IL1A,IL6,MSR1,TNF,VCAM1	192 (20)
ACSL4		enzyme	Activated	2.63	bias	3.68e-05	Ccl2,CCL5,ICAM1,IL6,PTGS2,SELL,STAT1	168 (20)
B4GALT6		enzyme	Activated	2.626	bias	2.21e-11	CCL2,CCL5,IL1B,IL6,PTGS2,TLR2,TNF	102 (7)
Ni2+		chemical reagent	Activated	2.624	bias	5.3e-08	CCL2,CXCL2,HIF1A,ICAM1,IL1A,IL6,VCAM1	194 (16)
KDM6B		enzyme	Activated	2.619	bias	4.43e-11	CCL3L3,CCL5,CD40,Cxcl11,GBP7,Igtp,IL12B,IL6,OASL,Oasl2	193 (9)
CREBBP		transcription regulator	Activated	2.618	bias	1e-20	B2M,CCL5,CCR5,CCR7,CDKN1A,CST7,CXCL10,CXCL12,Cxcl9,CYBB,EPSTI1,FASLG,HBB,HLA-G,IFIT1B,IFNB1,IL12RB1,IL6,IRF1,ISG15,LGALS3BP,MAP3K8,NFE2L2,NFKBIA,OAS3,PRF1,PSMB9,PTGS2,RSAD2,RTP4,SELE,SELP,SERPINA3,SOCS3,TAP2,TLR2,TNF,TNFSF10,USP18,VCAM1	153 (18)
ADRB3		G-protein coupled receptor	Activated	2.618	bias	2.68e-08	CCL2,Ccl2,CXCL12,IL1B,IL6,PTGS2,TNF	209 (22)
CD38		enzyme	Activated	2.617	bias	3.58e-07	CSF2RB,CYBB,FGL2,GBP2,GBP4,GBP7,ICAM1,IL1R2,IL6,SELL,Serpina3g (includes others),SOCS1,SOCS3,VCAM1	230 (13)
CTSK		peptidase	Activated	2.615	bias	1.11e-09	CCL2,Ccl2,CDKN1A,IL6,PTGS2,TLR2,TLR7	211 (21)
CCL11	3.975	cytokine	Activated	2.613	bias	3.69e-12	CCL11,CCL2,CCL3L3,CCL4,CXCL12,CXCL2,FAS,FASLG,ICAM1,IL1B,IL6,MMP3,TNF	183 (16)
SLR14		chemical reagent	Activated	2.611	bias	2.21e-11	CD274,CXCL10,H2-K2/H2-Q9,H2-Q5,HLA-A,IL1B,TNF
1-chloro-2,4-dinitrobenzene		chemical drug	Activated	2.611	bias	3.81e-08	CCL11,Ccl2,CCL4,IL1B,IL1R2,IL6,TNF	135 (10)
S100A4		other	Activated	2.609	bias	5.4e-07	CCL19,CCL5,CDKN1A,CSF3,ICAM1,MMP13,Saa3,VCAM1	189 (15)
PGF		growth factor	Activated	2.608	bias	2.75e-06	ATF3,CCL2,CCL4,HIF1A,IL1B,IL6,TNF	158 (18)
Stat3-Stat3		complex	Activated	2.608	bias	2.33e-05	CDKN1A,CXCL13,HIF1A,ICAM1,IL6,SERPINA3,SOCS3	95 (7)
zymosan A		chemical - endogenous non-mammalian	Activated	2.607	bias	1.25e-08	Ccl2,CD40,FAS,IL12B,IL1B,IL6,TNF	133 (12)
taurocholic acid		chemical - endogenous mammalian	Activated	2.607		2.88e-07	ATF3,CCL2,Ccl2,IL1B,IL6,PTGS2,TNF	155 (20)
LTB4R		G-protein coupled receptor	Activated	2.607	bias	4.64e-07	Ccl2,CCL3L3,CXCL2,FASLG,IRF5,PTGS2,TNF	212 (21)
ITK		kinase	Activated	2.601	bias	4.63e-12	CCL5,CD244,FAS,FASLG,Gzmb,HIF1A,HLA-A,Klrk1,Ly6a (includes others),PRF1,SCIMP,Serpina3g (includes others),SLAMF7,TNF,TNFSF10	210 (20)
Mapk		group	Activated	2.6	bias	1.39e-09	APLN,CCL2,CDKN1A,CYBB,IL1B,IL6,MMP13,MMP3,PER2,PRF1,PTGS2,STAT1,TNF,VCAM1	173 (19)
PANX1		transporter	Activated	2.598	bias	8.25e-09	Ccl2,CCL3L3,CCL5,CXCL2,IL1A,IL1B,TNF	176 (18)
IGF1R		transmembrane receptor	Activated	2.598	bias	0.0194	CCL5,CDKN1A,HIF1A,IL1A,IL1B,IL6,PTGS2,SFMBT2,TNF,TNFSF10
CARM1		transcription regulator	Activated	2.596	bias	3.8e-07	C3,Ccl2,CDKN1A,CSF3,CXCL10,ICAM1,MMP13,MMP3	229 (22)
TSLP		cytokine	Activated	2.592	bias	1.24e-06	CCL11,CCR7,CD40,ICAM1,IL12B,IL6,SELE,SELL,SELP	219 (19)
GH1		growth factor	Activated	2.592		0.00284	ATF3,CEBPD,IL6,Serpina3g (includes others),SOCS1,SOCS3,UBA7	226 (20)
CYBB	3.877	enzyme	Activated	2.589	bias	8.35e-15	CCL2,Ccl2,CCL5,CDKN1A,CXCL10,CXCL12,CYBB,ICAM1,IFNB1,IL1B,IL6,PTGS2,TNF	179 (17)
KRT17		other	Activated	2.588		1.24e-14	CCL11,CCL3L3,CCL4,CCL5,CCR5,CSF3,CXCL10,CXCL2,IL1B,IL6,MMP13,MMP3,TNF
advanced glycation end-products		chemical - endogenous mammalian	Activated	2.586	bias	1.4e-06	CCL2,CDKN1A,CXCL12,IL6,MMP13,PTGS2,TNF,VCAM1	210 (21)
ATF2		transcription regulator	Activated	2.586	bias	1.47e-05	ATF3,BCL2A1,FASLG,IFNB1,IL6,MMP13,PTGS2,TNF,VCAM1	164 (20)
MAP3K8	1.844	kinase	Activated	2.585		5.11e-14	Ccl2,CCL4,CCR5,CEBPD,CLIC5,CSF3,Cxcl11,CXCL2,ETV4,IFNB1,IL12B,IL1A,IL1B,IL6,IRGM,MMP3,PTGS2,SLFN12L,SOCS3,TNF,TXNIP	162 (17)
STAT		group	Activated	2.584	bias	9.47e-08	CDKN1A,CEBPD,EIF2AK2,IRF1,SERPINA3,SOCS1,SOCS3,TNF	96 (7)
RIPK1		kinase	Activated	2.576	bias	1.41e-11	CCL2,Ccl2,CCL3L3,CCL5,CSF3,CXCL10,CXCL2,Cxcl9,IFNB1,IL12B,IL1B,IL6,TNF	183 (17)
4-methylnitrosoamino-1-(3-pyridinyl)-1-butanone		chemical toxicant	Activated	2.576	bias	9.46e-06	CDKN1A,FASLG,IL6,LCP1,NFE2L2,PTGS2,SOCS3	166 (20)
THPO		cytokine	Activated	2.574	bias	1.06e-16	CMPK2,DDX58,DDX60,EPSTI1,ETV4,ICAM1,IL1B,IL6,IRF1,ISG15,NFE2L2,NFKBIA,RSAD2,SELP,SOCS3,STAT1,STAT2,TAP1,TNF,USP18	226 (24)
ANGPT2	1.748	growth factor	Activated	2.57	bias	3.36e-11	C1R,Ccl2,CCL3L3,CCL5,CDKN1A,CFB,CYBB,FAS,HIF1A,HSPB2,ICAM1,IL1B,IL6,MFGE8,NCF1,PTGS2,SERPING1,TLR3,TNF,TXNIP,VCAM1	186 (21)
mono-(2-ethylhexyl)phthalate		chemical toxicant	Activated	2.569	bias	0.0159	APOBEC1,FAS,FASLG,IFNB1,IL1B,NAMPT,TNF
ETS2		transcription regulator	Activated	2.567	bias	1.99e-05	CDKN1A,CSF3,ICAM1,IL12B,MMP13,MMP3,MSR1,TNF	201 (21)
entolimod		biologic drug	Activated	2.563	bias	3.57e-15	ATF3,BCL2A1,CCL4,CXCL10,CXCL2,Cxcl9,IL1A,IL1B,IL6,IRF1,NFKBIA,TNF	129 (9)
PLA2G4A		enzyme	Activated	2.563	bias	1.25e-08	CCL2,Ccl2,ICAM1,IL1B,IL6,PTGS2,TNF	158 (19)
tributyrin		chemical drug	Activated	2.563	bias	5.53e-08	ATF3,BCL2A1,CCL2,CD274,CDKN1A,IL1B,IL6,MMP13,PTGS2,USP53	171 (22)
NOD1		other	Activated	2.56	bias	3.11e-10	CCL5,CXCL2,IFNB1,IL1A,IL1B,IL6,TNF,VCAM1	195 (21)
TNFSF13B		cytokine	Activated	2.557	bias	1.7e-13	APLN,BCL2A1,C2,CCL2,CCL4,CCR7,CD274,CD40,FAS,FCGR2B,FPR2,HCAR2,ICAM1,ICOSLG/LOC102723996,IL1RN,NAMPT,PLAUR,PLEK,SELL,TARM1	184 (19)
10E,12Z-octadecadienoic acid		chemical - endogenous mammalian	Activated	2.552		1.65e-06	APLN,ATF3,CCL2,Ccl2,CLIC5,IL1B,IL1RN,IL6,NAMPT,PTGS2,RGS1,SLC38A3,TNF	187 (19)
IL22		cytokine	Activated	2.547	bias	8.55e-16	BCL3,C3,CCL3L3,CCL4,CCL5,CD274,CXCL10,CXCL12,CXCL13,CXCL2,Cxcl9,IL12B,IL1A,IL1B,IL6,LCN2,MMP3,PTGS2,SERPINA3,SOCS3,TIFA,TNF	209 (16)
D-galactosamine		chemical - endogenous mammalian	Activated	2.545	bias	1.29e-09	CD14,CXCL10,CXCL2,ICAM1,IFNB1,IL12B,IL6,NFE2L2,TNF,TNFSF10	155 (15)
mir-15		microRNA	Activated	2.54	bias	5.4e-11	CCL2,Ccl2,CCL5,CD69,DDX58,IFIT1,IFNB1,IL1B,IL6,ISG15,OAS1,PLAUR,PTGS2,TNF	161 (17)
MAP2K6		kinase	Activated	2.538	bias	1.13e-11	CCL2,Ccl2,CD40,CDKN1A,CXCL10,IFIT2,IL6,IRF9,ISG15,MMP13,MMP3,PTGS2,STAT1,TNFSF10	207 (21)
morphine		chemical drug	Activated	2.531	bias	5.54e-07	CCL3L3,CCR5,CDKN1A,CYBB,FAS,FASLG,FZD10,IL12B,IL1B,IL6,PTGS2,TLR2,TNF	135 (17)
MSC		transcription regulator	Activated	2.53	bias	4.74e-08	CCL2,CCL4,DDX60,EPSTI1,IFI44,IFIT1,IRF7,SELL,TLR7,XAF1
puromycin aminonucleoside		chemical reagent	Activated	2.53	bias	7.85e-06	C4A/C4B,CD14,CLIC5,CP,CYBB,LCN2,Ms4a6b,NCF1,PLA1A,PSMB8
IRF9	2.359	transcription regulator	Activated	2.525	bias	7.88e-44	CCL19,CD274,CD69,CXCL10,Cxcl9,GBP6,Ifi47,IFIT1,IFIT2,IFIT3,IFITM3,IFNB1,Iigp1,IL1A,IL27,IL6,IRF1,IRF5,IRF7,ISG15,OAS2,Oasl2,RTP4,SOCS1,SOCS3,STAT1,STAT2,Tgtp1/Tgtp2,TNF,TNFSF10,USP18,ZBP1	236 (17)
CXCL8		cytokine	Activated	2.513	bias	1.08e-07	CD69,CXCL2,FAS,FASLG,ICAM1,IL1B,NFKBIA,PTGS2,SELL,SOCS1,TNF,VCAM1	193 (17)
N-nitro-L-arginine methyl ester		chemical drug	Activated	2.506		8.69e-17	APLN,ATF3,CCL11,CCL2,Ccl2,CCR5,CXCL2,CYBB,FAS,HIF1A,ICAM1,IL12B,IL1B,IL6,NFKBIA,PTGS2,SELE,TLR2,TNF,VCAM1	162 (16)
MAP3K1		kinase	Activated	2.502	bias	1.26e-07	ATF3,Ctla2a/Ctla2b,FAS,FASLG,MMP13,MMP3,PLAUR,PTGS2,TNF	164 (17)
CSF1		cytokine	Activated	2.499	bias	6.34e-30	APOBEC1,C5AR1,CCL2,Ccl2,CCL5,Ccl7,CCR5,CDKN1A,Chil3/Chil4,CXCL10,CXCL2,CYBB,FAS,FASLG,FCGR3A/FCGR3B,HIF1A,HLA-A,ICOSLG/LOC102723996,IFIT1,IFIT2,IFNB1,Iigp1,IL12B,IL1A,IL1B,IL27,IL6,IRF1,IRF5,IRF7,MSR1,MVD,OAS1,OAS2,OAS3,PTPRC,SLFN12L,SOCS1,STAT1,TLR1,TLR2,TNF,TRIM14,VCAM1	194 (14)
IL2RG		transmembrane receptor	Activated	2.496		9.72e-13	CCL11,CXCL10,Cxcl9,Gzmb,HLA-A,IFNB1,IL6,IRF7,ISG15,Mx1,STAT1,TLR3,TNF,UBA7	235 (20)
CYP19A1		enzyme	Activated	2.488		1.07e-08	CD14,CXCL10,FKBP5,GBP2,HLA-A,HLA-E,IL6,OSMR,PTGS2,PTX3,Srgn,TGM1,TNF	190 (26)
dihydrotestosterone		chemical - endogenous mammalian	Activated	2.486	bias	8.83e-05	APOD,B2M,C4A/C4B,CDKN1A,Chil3/Chil4,CYBB,FKBP5,HIF1A,HLA-A,IL12B,IL1A,IL6,MAFF,MMP13,MMP3,NCF1,NFKBIA,PER2,PTGS2,SGK1,TNF,TNFSF10,VCAM1,VCAN	187 (22)
ADAM17		peptidase	Activated	2.485	bias	2.28e-07	Ccl2,CSF3,CXCL2,ICOSLG/LOC102723996,IL6,IRF1,LRG1,MMP13,Saa3,SELL,SOCS3,TNF,TRIM5	197 (20)
Pkc(s)		group	Activated	2.483	bias	1.09e-08	APLN,ATF3,CCL2,CCR5,CDKN1A,CYBB,FAS,HIF1A,IL12B,IL1B,IL6,MMP13,MSR1,PER2,PTGS2,TGM1,TNF,VCAM1	203 (21)
Klrk1	6.528	transmembrane receptor	Activated	2.476	bias	1.17e-10	CCL3L3,CCL4,CCL5,CCR5,Gzmb,Ly6a (includes others),PRF1,STAT1,TNF,XDH	178 (13)
IKBKE		kinase	Activated	2.473	bias	2.62e-30	ACOD1,Ccl2,CCL3L3,CCL5,CSF3,CXCL10,Cxcl11,CXCL12,CXCL2,Cxcl9,HLA-A,IFI16,IFIH1,IFIT1,IFIT2,IFIT3,IFNB1,IL1A,IL6,IL7,IRF7,MMP13,MMP3,NFKBIA,PTGS2,RSAD2,STAT1,TNF,ZC3HAV1	228 (19)
LGALS3		other	Activated	2.469	bias	2.52e-10	CCL2,Ccl2,CCL3L3,CDKN1A,Chil3/Chil4,CXCL2,FAS,ICAM1,IL1B,IL6,MSR1,SELE,SOCS3,TNF,VCAM1	200 (20)
Pka		complex	Activated	2.464	bias	3.45e-07	CCR7,CD14,CD40,CDKN1A,CXCL10,IL6,IRF1,MMP3,NCF1,PTGS2,SGK1,TNF,XAF1	130 (14)
ICAM1	3.509	transmembrane receptor	Activated	2.46	bias	3.55e-11	CCL3L3,CCL4,CCL5,CD69,CXCL2,Gzmb,ICAM1,IL1A,IL1B,IL6,TNF,VCAM1	177 (18)
CCL2	6.788	cytokine	Activated	2.455	bias	5.93e-16	CCL11,CCL2,Ccl2,CCL5,CD40,CEBPD,Chil3/Chil4,CXCL10,FASLG,ICAM1,IL12B,IL1A,IL1B,IL6,LCN2,NCF1,PTGS2,STAT1,TNF,VCAM1	211 (19)
GPR84	3.186	G-protein coupled receptor	Activated	2.449	bias	3.46e-10	Ccl2,CCL3L3,IL12B,IL1B,IL6,TNF	209 (11)
NEK6		kinase	Activated	2.449	bias	1.02e-09	CXCL10,FGL2,IFNB1,IL6,PTGS2,RGS1	77 (4)
tin mesoporphyrin		chemical drug	Activated	2.449		2.53e-09	Ccl2,CCL3L3,ICAM1,IL1B,IL6,TNF	109 (7)
TNNI3		transporter	Activated	2.449	bias	5.49e-09	CCL11,Ccl2,CCL3L3,CCL4,CCL5,CCR5
PTGIS		enzyme	Activated	2.449	bias	2.91e-07	CXCL2,ICAM1,IL1B,IL6,PTGS2,TNF	168 (19)
HMGXB4		other	Activated	2.449	bias	1.03e-06	CD274,ICAM1,IFIH1,IL27,PARP14,RNF213
RNF138		enzyme	Activated	2.449	bias	1.35e-06	CCR7,ICAM1,IL1A,IL6,NAMPT,TNF	177 (9)
SLC9A3R1		transporter	Activated	2.449	bias	4.17e-05	CCL11,CCL3L3,CCL4,CCL5,CXCL2,IL6	164 (18)
Srgn	1.561	other	Activated	2.449	bias	0.000102	CXCL13,GPR65,Gzmb,IL12B,IL1B,Irgm1
hexachlorobenzene		chemical toxicant	Activated	2.449	bias	0.000238	C4A/C4B,CD14,CP,LCN2,Ms4a6b,PSMB8
lomustine		chemical drug	Activated	2.449	bias	0.000488	C4A/C4B,CD14,CP,LCN2,PLA1A,PSMB8
phospholipid		chemical - endogenous mammalian	Activated	2.447	bias	5.49e-09	Ccl2,CCL3L3,CCL4,CCL5,CXCL10,PTGS2	141 (18)
platelet activating factor		chemical - endogenous mammalian	Activated	2.438	bias	1.05e-13	ANGPT2,CCL2,CD69,CDKN1A,ICAM1,IL1A,IL6,NFKBIA,PLAUR,PTGS2,SELL,SELP,SOCS3,TNF	154 (20)
BRCA1		transcription regulator	Activated	2.438		6.88e-11	APOBEC1,CCL5,CDKN1A,CYP1B1,DDX58,FAS,FKBP5,HBB,IFIT1,IFIT2,IFIT3,IRF7,Ly6a (includes others),NFE2L2,PLTP,STAT1,TAP1,TNF,VCAN	241 (24)
salmonella typhimurium lipopolysaccharide		chemical - endogenous non-mammalian	Activated	2.437	bias	1.02e-09	Ccl2,CCL5,IL1B,IL6,PTGS2,TNF
paraquat		chemical toxicant	Activated	2.437	bias	2.76e-06	ANGPT2,CCL19,CEBPD,CYBB,FAS,FASLG,IL6,MMP3,PLCE1,PLTP,PTGS2	200 (20)
TLR6		transmembrane receptor	Activated	2.436	bias	7.69e-07	ATF3,CCL5,IL12B,IL1B,IL6,TNF	206 (18)
FABP4		transporter	Activated	2.435	bias	4.69e-10	Ccl2,IL12B,IL1A,IL1B,IL6,MSR1,PTGS2,SOCS3,TNF	182 (23)
SPP1		cytokine	Activated	2.434	bias	1.6e-08	CCL2,Ccl2,CCL3L3,CCL4,CCL5,CDKN1A,CXCL12,CXCL2,ICAM1,IFNB1,IL12B,IL1A,IL1B,IL6,MMP13,PTGS2,TNF	174 (21)
Duxbl1		other	Activated	2.433	bias	3.46e-10	OAS1,Oas1b,OAS2,OAS3,OASL,Oasl2
CXCL1		cytokine	Activated	2.433	bias	1.99e-08	Ccl2,ICAM1,IL1B,IL6,SOCS3,TNF	154 (18)
GNAI3		enzyme	Activated	2.433	bias	5.66e-07	CCL2,CCL3L3,CCL4,CCL5,IL6,TNF	225 (23)
STAT1/3/5 dimer		complex	Activated	2.433	bias	1.75e-06	BCL3,CEBPD,IRF1,MMP13,MMP3,SOCS3
nelfinavir		chemical drug	Activated	2.433	bias	0.00156	ATF3,CH25H,PLIN4,Serpina3g (includes others),TGM1,TSC22D3
1,4-bis[2-(3,5-dichloropyridyloxy)]benzene		chemical toxicant	Activated	2.433	bias	0.0107	CDKN1A,ICAM1,IL1R1,LRG1,MAFF,Sult1a1
PDX1		transcription regulator	Activated	2.433		0.0316	ATF3,Ccl2,CXCL2,IL1B,IL6,RSAD2,TXNIP
dicarbethoxydihydrocollidine		chemical toxicant	Activated	2.429	bias	2.24e-07	Ccl2,IL1B,MYD88,SGK1,TNF,UBD,VCAM1	95 (7)
irinotecan		chemical drug	Activated	2.428	bias	1.6e-10	APOBEC3B,CCL5,CXCL10,FAS,IFNB1,IL1B,IL6,SOCS3,TNF	214 (18)
F2R		G-protein coupled receptor	Activated	2.428	bias	6.7e-09	ANGPT2,CASP4,CCL2,Ccl2,CXCL12,ICAM1,IL1B,IL6,PLAUR,PTGS2,SELE,SELP,VCAM1	217 (20)
NCOA2		transcription regulator	Activated	2.426	bias	2.75e-28	C1R,C3,Ccl2,CCL3L3,CCL4,CCL5,CCR7,CDKN1A,CXCL10,Cxcl11,Cxcl9,GBP5,HCAR2,HLA-A,IFIT1B,IFIT2,Ifitm1,IFNB1,IL1A,IL1B,IL6,IRF1,IRF7,ISG15,MMP13,Mx1,NFKBIA,OAS3,OASL,PLTP,PTGS2,TNF,TRIM5,TSC22D3	212 (20)
PCSK9		peptidase	Activated	2.425	bias	6.16e-14	Ccl2,Ccl7,ICAM1,Ifi27l2a/Ifi27l2b,IFITM3,IL1B,IL6,IRF7,ISG15,Ly6a (includes others),TLR2	137 (11)
C5		other	Activated	2.425	bias	9.51e-13	C5AR1,Ccl2,CCL3L3,CCL4,CXCL2,IL1B,IL6,SOCS3,TNF	221 (20)
CLEC12A		other	Activated	2.425	bias	1.27e-11	IFIT2,IFIT3,IRF7,ISG15,RSAD2,USP18	210 (13)
FBXO42		other	Activated	2.425	bias	1.02e-09	CCL5,ICAM1,IL6,STAT1,TNF,VCAM1	185 (13)
CTTN		other	Activated	2.425	bias	2.53e-09	Ccl2,CCL5,CXCL2,IL1B,IL6,TNF	201 (20)
Ikb		group	Activated	2.425	bias	5.3e-08	CCL2,CFB,ICAM1,IL6,MMP13,PTGS2,TNF	144 (13)
[truncated: 1,934 more rows]

## Sheet: USR cytokine
Upstream Regulator	Expr Log Ratio	Molecule Type	Predicted Activation State	Activation z-score	Flags	p-value of overlap	Target Molecules in Dataset	Mechanistic Network
[truncated: 2,479 more rows]

[truncated: 4 more sheets: Dis&Func, DESeq2 gene list, MSigDB, BTMs]
