# Supplementary material for: SARS-CoV-2 omicron BA.5 and XBB variants have increased neurotropic potential over BA.1 in K18-hACE2 mice and human brain organoids
Source: Front Microbiol. 2023 Nov 23;14:1320856. doi: 10.3389/fmicb.2023.1320856 (PMC10706942; doi:10.3389/fmicb.2023.1320856)
Supplement: Supplementary file 4 [file Table_3.XLSX]

## Sheet: BA.5vsUninfect_ALL
ensembl_ID	gene_ID	logFC	logCPM	F	PValue	FDR	BA5_1	BA5_2	BA5_3	BA5_4	UninfectedControl1	UninfectedControl2	UninfectedControl3	UninfectedControl4
ENSG00000258377.1	RP11-649E7.5	8.75754	0.783094	39.3917	5.07656e-06	0.000111721	51	44	33	68	0	0	0	0
ENSG00000260107.1	AC005606.15	7.57511	-0.372642	50.8931	8.92438e-07	3.1434e-05	36	16	11	23	0	0	0	0
ENSG00000213147.3	RPL23AP60	6.81582	-0.846488	27.607	4.55573e-05	0.000604049	16	15	20	0	0	0	0	0
ENSG00000285508.1	RP5-931K24.3	6.74645	0.892394	82.6646	6.75152e-09	1.33511e-06	16	52	48	23	0	1	0	0
ENSG00000259884.1	NR4A1AS	6.24068	-1.17839	16.9845	0.000583508	0.00457373	13	19	2	0	0	0	0	0
ENSG00000199568.1	RNU5A-1	5.91718	-1.46843	20.956	0.000206742	0.00198738	2	11	1	13	0	0	0	0
ENSG00000283321.1	RP11-507K12.1	5.62481	-1.55154	12.533	0.00219304	0.0133025	9	12	0	1	0	0	0	0
ENSG00000261071.1	RP1-223E5.4	5.48547	-1.17939	10.5024	0.0043126	0.0229693	0	0	14	6	0	0	0	0
ENSG00000071991.9	CDH19	5.33738	-1.31714	15.4992	0.000888518	0.00644112	4	5	8	1	0	0	0	0
ENSG00000286128.1	CTC-205M6.5	5.25444	-1.86692	17.6102	0.000687569	0.00521516	2	6	8	1	0	0	0	0
ENSG00000274600.1	RIMBP3B	5.09317	-1.18002	10.3575	0.00453524	0.0239204	10	0	0	5	0	0	0	0
ENSG00000201098.1	RNY1	4.93973	-1.11388	33.0132	8.91909e-06	0.000173646	6	11	5	17	0	0	1	0
ENSG00000247033.1	RP11-252E2.1	4.88107	-1.70134	8.81663	0.00789414	0.0374682	2	9	2	0	0	0	0	0
ENSG00000277918.1	RNVU1-28	4.7745	-1.20023	28.505	2.34362e-05	0.000361868	4	11	5	15	0	1	0	0
ENSG00000265967.1	AC100830.4	4.77303	-1.83259	11.1149	0.00349731	0.019419	5	4	3	0	0	0	0	0
ENSG00000268193.5	AC002985.3	4.7718	-1.83221	10.8116	0.00387724	0.0210391	4	5	3	0	0	0	0	0
ENSG00000267355.2	RPL9P29	4.76652	-1.79864	9.20774	0.00683448	0.0334121	0	7	5	0	0	0	0	0
ENSG00000263859.1	RP11-498C9.16	4.76611	-1.83264	8.83711	0.0078343	0.0372604	1	1	10	0	0	0	0	0
ENSG00000222328.1	RNU2-2P	4.70017	0.806487	36.3554	4.58989e-06	0.000103478	18	24	19	123	1	2	4	1
ENSG00000271153.1	RPL23AP88	4.66185	-1.79812	6.74289	0.017732	0.0703413	0	0	0	11	0	0	0	0
ENSG00000270008.1	RP11-298P3.4	4.65063	-1.76568	9.20366	0.00684469	0.033446	0	5	3	3	0	0	0	0
ENSG00000229186.4	ADAM1A	4.5242	-2.09563	10.7506	0.00395908	0.0214076	1	4	0	5	0	0	0	0
ENSG00000286864.1	RP11-497D24.1	4.52173	-2.05493	14.5834	0.00116319	0.00802924	3	2	3	2	0	0	0	0
ENSG00000206585.1	RNVU1-7	4.41028	3.24893	65.277	1.47268e-07	8.71176e-06	283	334	153	499	0	58	12	0
ENSG00000200463.1	SNORD118	4.38247	-2.09548	8.09331	0.0103751	0.0464706	1	0	1	7	0	0	0	0
ENSG00000283345.1	CTD-3092A11.3	4.38224	-1.83239	10.6125	0.00415167	0.0222793	3	0	1	5	0	0	0	0
ENSG00000113525.10	IL5	4.38102	-2.05478	8.44489	0.00907435	0.0418079	5	2	0	2	0	0	0	0
ENSG00000260008.1	RP11-732A21.2	4.3741	-1.86734	11.8425	0.00274406	0.0159532	3	2	4	0	0	0	0	0
ENSG00000253356.1	RP11-90P5.2	4.37177	-1.93943	7.00106	0.0159605	0.0648087	2	0	7	0	0	0	0	0
ENSG00000124827.7	GCM2	4.21592	-2.22508	11.4344	0.00381929	0.0208017	2	3	1	2	0	0	0	0
ENSG00000242390.1	RPL6P9	4.21559	-2.13767	12.315	0.0023524	0.0140966	2	2	2	2	0	0	0	0
ENSG00000258131.1	RP11-541G9.1	4.214	-2.13769	10.0014	0.00513862	0.0264921	3	3	2	0	0	0	0	0
ENSG00000236679.2	RPL23AP24	4.18328	-0.609688	15.0289	0.000816821	0.00601268	7	5	0	11	0	1	0	0
ENSG00000213409.4	C1QBPP2	4.03836	-1.79869	6.94445	0.0163311	0.0659367	1	1	0	5	0	0	0	0
ENSG00000268472.2	RP11-356J5.13	4.03693	-2.09588	7.8956	0.0111976	0.0492621	2	2	0	3	0	0	0	0
ENSG00000249231.8	CASC16	4.03668	-2.18077	8.51	0.0088541	0.0410459	1	1	1	4	0	0	0	0
ENSG00000257622.1	RP11-44N21.4	4.03636	-2.22516	7.9372	0.0110187	0.0485674	5	1	1	0	0	0	0	0
ENSG00000255526.6	NEDD8-MDP1	4.0362	-1.83229	6.05922	0.0235975	0.0872691	2	0	2	3	0	0	0	0
ENSG00000259205.2	PRKXP1	4.03616	-2.13764	9.42702	0.00631059	0.0313042	3	0	2	2	0	0	0	0
ENSG00000288031.1	RP11-1L5.2	4.03544	-2.13773	8.17175	0.0100677	0.0453432	1	3	0	3	0	0	0	0
ENSG00000229278.2	RP11-483F11.7	4.03544	-2.13765	9.08663	0.00714457	0.0346405	1	3	0	3	0	0	0	0
ENSG00000260401.1	RP11-800A3.4	4.03528	-2.1808	8.69662	0.00825524	0.0387432	3	3	0	1	0	0	0	0
ENSG00000248993.1	XXbac-BPG181M17.5	4.03395	-2.13757	6.9553	0.0162593	0.0657235	0	4	0	3	0	0	0	0
ENSG00000288579.1	RP11-15G6.1	4.03394	-1.9772	7.97859	0.0108438	0.0479645	0	4	0	3	0	0	0	0
ENSG00000198796.7	ALPK2	4.0329	-2.22519	8.62467	0.0084806	0.0396489	0	1	3	3	0	0	0	0
ENSG00000084674.15	APOB	4.03201	-2.22521	8.47353	0.00897671	0.0414764	0	4	1	2	0	0	0	0
ENSG00000063515.3	GSC2	4.03127	-2.01574	11.2097	0.00338722	0.0189292	1	2	3	1	0	0	0	0
ENSG00000227857.2	RP4-533D7.5	4.03098	-2.18084	8.53738	0.00876325	0.040686	0	1	4	2	0	0	0	0
ENSG00000255073.8	ZFP91-CNTF	3.86481	-0.730163	28.3007	2.45368e-05	0.000373653	8	18	24	5	0	1	3	0
ENSG00000260698.1	RP11-439E19.9	3.82991	-2.22513	7.66444	0.0122536	0.0528658	3	1	0	2	0	0	0	0
ENSG00000266651.1	RP11-138I1.3	3.82984	-2.27104	7.29288	0.0141935	0.0591876	4	1	0	1	0	0	0	0
ENSG00000229052.2	RP11-386I23.1	3.82973	-2.27102	7.27724	0.0142824	0.0594062	1	0	1	4	0	0	0	0
ENSG00000277948.1	ENSG10010138238.1	3.82843	-2.27105	7.70493	0.0120608	0.0521879	1	2	0	3	0	0	0	0
ENSG00000276390.1	RP1-197B17.5	3.82833	-2.18087	7.54709	0.012832	0.0547895	2	2	0	2	0	0	0	0
ENSG00000226516.7	FAM138B	3.82813	-2.13764	7.35124	0.0138671	0.0581066	0	1	1	4	0	0	0	0
ENSG00000240254.2	B4GALT4-AS1	3.82798	-2.22525	9.15111	0.00697757	0.0339736	2	1	1	2	0	0	0	0
ENSG00000273687.1	RP5-837J1.6	3.82762	-2.27107	7.99445	0.0107776	0.0477481	2	0	2	2	0	0	0	0
ENSG00000286064.1	RP4-657E11.11	3.82762	-2.22527	8.054	0.0105331	0.0469351	2	0	2	2	0	0	0	0
ENSG00000254829.1	RP11-7I15.3	3.82744	-2.13781	5.92429	0.0249983	0.0913273	4	0	2	0	0	0	0	0
ENSG00000286319.1	RP11-125H8.3	3.82743	-2.05502	5.48622	0.030239	0.105778	4	0	2	0	0	0	0	0
ENSG00000281909.1	HERC2P7	3.82685	-1.97702	5.29	0.0329827	0.112773	0	3	0	3	0	0	0	0
ENSG00000231625.4	SLC47A1P2	3.82633	-2.27107	9.08812	0.00714067	0.0346277	2	2	1	1	0	0	0	0
ENSG00000153233.13	PTPRR	3.82588	-2.18071	7.17316	0.0148903	0.0614271	3	1	2	0	0	0	0	0
ENSG00000257818.1	C1GALT1P1	3.82569	-2.13789	6.86622	0.0168596	0.0676531	1	0	3	2	0	0	0	0
ENSG00000124253.11	PCK1	3.82513	-2.1809	6.93445	0.0163977	0.0661667	1	4	0	1	0	0	0	0
ENSG00000113263.13	ITK	3.82485	-2.22531	7.78137	0.0117061	0.0510175	0	3	1	2	0	0	0	0
ENSG00000279613.1	RP13-638C3.5	3.82412	-2.27109	7.71195	0.0120277	0.0520912	0	1	3	2	0	0	0	0
ENSG00000069431.13	ABCC9	3.82372	-1.93998	6.52534	0.0193981	0.0752257	1	0	4	1	0	0	0	0
ENSG00000287195.1	RP11-1146N6.3	3.82367	-2.27112	7.32399	0.0140184	0.0586254	1	0	4	1	0	0	0	0
ENSG00000202538.1	RNU4-2	3.77477	0.700435	67.0724	4.05542e-08	3.78976e-06	34	37	21	85	5	4	3	3
ENSG00000276278.1	RP11-182J1.3	3.75175	-1.34211	7.26009	0.0132572	0.0561202	0	0	16	1	0	0	1	0
ENSG00000269349.1	CTD-3099C6.5	3.61001	-0.482065	16.3945	0.00053708	0.00429414	12	6	10	8	0	3	0	0
ENSG00000238168.5	IFITM3P5	3.58807	-2.2711	5.88292	0.0254464	0.0925978	2	0	0	3	0	0	0	0
ENSG00000286812.1	RP11-677O4.8	3.58786	-2.18083	4.98812	0.037775	0.124584	4	0	0	1	0	0	0	0
ENSG00000239677.6	PDZRN3-AS1	3.58785	-2.13792	4.98293	0.0378642	0.124794	4	0	0	1	0	0	0	0
ENSG00000260552.1	COSMOC	3.58611	-2.01593	5.90068	0.025253	0.0919786	4	1	0	0	0	0	0	0
ENSG00000276232.1	SCARNA10	3.58597	-2.27114	6.83331	0.0170875	0.0683329	2	0	1	2	0	0	0	0
ENSG00000260537.2	RP11-529K1.3	3.58584	-0.624545	3.04459	0.0972007	0.24889	0	0	0	5	0	0	0	0
ENSG00000182824.7	FAM230E	3.58462	-2.27116	6.84081	0.0170353	0.0681731	2	2	0	1	0	0	0	0
ENSG00000265693.1	RP11-815I9.5	3.58441	-2.27118	5.91515	0.0250965	0.0915653	0	1	1	3	0	0	0	0
ENSG00000228948.2	SLC25A6P5	3.58432	-2.22535	7.23199	0.0145432	0.0602556	1	1	1	2	0	0	0	0
ENSG00000164746.14	C7orf57	3.58431	-2.09598	7.37891	0.0137153	0.0576103	1	1	1	2	0	0	0	0
ENSG00000242888.1	RP11-436M15.1	3.58425	-2.36734	7.56478	0.0142505	0.0593269	2	1	1	1	0	0	0	0
ENSG00000187103.3	FUNDC2P3	3.58414	-2.13781	5.41383	0.0312198	0.108157	3	1	1	0	0	0	0	0
ENSG00000285583.1	CTD-2192J16.28	3.58395	-2.27117	6.84445	0.01701	0.0681068	1	0	2	2	0	0	0	0
ENSG00000236430.1	KRT8P29	3.58394	-2.09613	5.63137	0.0283757	0.100728	1	0	2	2	0	0	0	0
ENSG00000286292.1	RP11-326I11.7	3.58385	-2.09605	6.56205	0.019105	0.0743705	2	0	2	1	0	0	0	0
ENSG00000266378.1	RP11-214O1.3	3.58269	-2.27121	6.11931	0.0230023	0.0857656	0	2	1	2	0	0	0	0
ENSG00000257907.2	EEF1A1P17	3.58223	-2.18082	7.80162	0.0116141	0.0507087	1	1	2	1	0	0	0	0
ENSG00000261303.6	RP11-160C18.2	3.58183	-2.31847	6.54565	0.0192353	0.074741	1	0	3	1	0	0	0	0
ENSG00000260318.1	COX6CP1	3.58098	-2.18075	5.68617	0.0277064	0.0989361	0	3	1	1	0	0	0	0
ENSG00000188383.8	GPAT2P2	3.58093	-1.90349	6.70589	0.0180036	0.0711028	1	3	1	0	0	0	0	0
ENSG00000278231.1	RP5-906C1.1	3.5806	-2.18104	6.99491	0.0160002	0.0649226	0	2	2	1	0	0	0	0
ENSG00000102174.10	PHEX	3.58051	-2.22542	5.59773	0.0287956	0.101919	1	2	2	0	0	0	0	0
ENSG00000247570.2	SDCBPP2	3.58025	-2.05549	7.27413	0.0143001	0.0594466	0	1	3	1	0	0	0	0
ENSG00000261763.1	RP11-442N1.2	3.58024	-2.13779	6.51265	0.0195006	0.0754858	0	1	3	1	0	0	0	0
ENSG00000273165.1	RP11-1057B6.1	3.58012	-2.27121	5.91769	0.0250692	0.091514	1	1	3	0	0	0	0	0
ENSG00000254432.1	RP11-33I11.2	3.57975	-2.22541	5.33715	0.0322985	0.11102	1	0	4	0	0	0	0	0
ENSG00000262791.1	RP11-961A15.1	3.57853	-2.13798	4.98395	0.0378466	0.124766	0	2	3	0	0	0	0	0
ENSG00000253117.5	OC90	3.52325	-1.4164	19.1322	0.000242992	0.00226243	10	7	5	2	0	0	1	1
ENSG00000246777.1	RP11-61A14.4	3.40655	-1.41686	20.9635	0.000147522	0.00151153	3	6	6	7	1	0	1	0
ENSG00000008197.5	TFAP2D	3.39074	-1.76511	6.7931	0.0161333	0.0653285	11	2	0	0	1	0	0	0
ENSG00000254959.6	INMT-MINDY4	3.38131	-1.34157	7.42767	0.012368	0.0532598	3	19	0	0	0	2	0	0
ENSG00000237280.1	RP11-96C23.9	3.29521	-2.31853	4.87709	0.0397336	0.129217	1	0	0	3	0	0	0	0
ENSG00000256625.1	RP11-582E3.4	3.29521	-2.31841	4.82326	0.0407247	0.131642	1	0	0	3	0	0	0	0
ENSG00000205822.10	TPTE2P6	3.2951	-2.27114	5.2606	0.0334177	0.113891	2	0	0	2	0	0	0	0
ENSG00000230946.3	HNRNPA1P68	3.29509	-2.22547	4.48312	0.0476815	0.147889	2	0	0	2	0	0	0	0
ENSG00000197934.8	CYYR1-AS1	3.29506	-2.13784	5.58791	0.0289195	0.102298	2	0	0	2	0	0	0	0
ENSG00000264672.6	SEPTIN4-AS1	3.29501	-2.27105	4.53827	0.0464663	0.14503	3	0	0	1	0	0	0	0
ENSG00000242439.1	CTD-2349P21.1	3.29499	-2.22536	4.92087	0.0389479	0.127434	3	0	0	1	0	0	0	0
ENSG00000224885.1	EIPR1-IT1	3.29489	-2.18097	4.61756	0.0447807	0.141042	4	0	0	0	0	0	0	0
ENSG00000200795.1	RNU4-1	3.29361	-0.533718	24.0266	6.72385e-05	0.00082238	9	13	12	28	1	4	0	2
ENSG00000224363.2	RP11-289H16.1	3.29341	-2.36743	5.61417	0.0285895	0.101267	1	1	0	2	0	0	0	0
ENSG00000234995.1	RPS3AP28	3.2934	-2.31854	5.6661	0.0279493	0.0994976	1	1	0	2	0	0	0	0
ENSG00000262117.5	BCAR4	3.29338	-2.22534	4.90916	0.0391563	0.12792	1	1	0	2	0	0	0	0
ENSG00000286411.1	CTB-98M4.1	3.29332	-2.36743	5.6146	0.0285841	0.101261	2	1	0	1	0	0	0	0
ENSG00000287302.1	RP11-172F4.8	3.29331	-2.31855	5.67226	0.0278745	0.0993187	2	1	0	1	0	0	0	0
ENSG00000206838.1	SNORA5A	3.29331	-2.31854	5.04152	0.0368724	0.122605	2	1	0	1	0	0	0	0
ENSG00000150722.11	PPP1R1C	3.29327	-2.13798	5.45017	0.030723	0.106983	2	1	0	1	0	0	0	0
ENSG00000260206.1	CTD-2026K11.2	3.29321	-2.31855	4.88335	0.0396201	0.129015	3	1	0	0	0	0	0	0
ENSG00000227693.1	GSTM3P1	3.29308	-2.27105	4.53503	0.0465366	0.145184	0	0	1	3	0	0	0	0
ENSG00000104321.11	TRPA1	3.29299	-2.27128	5.32526	0.0324694	0.111398	1	0	1	2	0	0	0	0
ENSG00000259228.1	HNRNPA1P62	3.29292	-2.36745	5.62435	0.0284627	0.100921	2	0	1	1	0	0	0	0
ENSG00000287920.1	RP3-510L9.2	3.29168	-2.27108	4.68453	0.0434116	0.137976	0	2	0	2	0	0	0	0
ENSG00000228723.6	SRGAP3-AS2	3.29167	-2.22539	5.73435	0.0271326	0.0972762	0	2	0	2	0	0	0	0
ENSG00000144010.10	TRIM43B	3.29167	-2.09599	4.85306	0.0401726	0.130201	0	2	0	2	0	0	0	0
ENSG00000283538.3	RP11-180P8.1	3.29159	-2.36746	5.63041	0.0283876	0.100745	1	2	0	1	0	0	0	0
ENSG00000246820.2	RIC3-DT	3.29159	-2.36745	5.62241	0.0284869	0.100981	1	2	0	1	0	0	0	0
ENSG00000147889.18	CDKN2A	3.29159	-2.27125	5.30844	0.0327131	0.112087	1	2	0	1	0	0	0	0
ENSG00000180801.14	ARSJ	3.29149	-2.05563	4.6511	0.0440891	0.13967	2	2	0	0	0	0	0	0
ENSG00000252757.1	RN7SKP96	3.29128	-2.31856	5.67596	0.0278297	0.0992024	0	1	1	2	0	0	0	0
ENSG00000274210.1	RNVU1-27	3.29119	-2.41806	6.31265	0.0231221	0.0860859	1	1	1	1	0	0	0	0
ENSG00000263321.1	RP11-388C12.5	3.29119	-2.27118	6.84814	0.0169844	0.0680382	1	1	1	1	0	0	0	0
ENSG00000273584.1	RP11-861L17.4	3.29119	-2.2253	5.67922	0.0277903	0.0991467	1	1	1	1	0	0	0	0
ENSG00000256603.1	RP11-667M19.2	3.29119	-2.22522	5.42681	0.0310412	0.107786	1	1	1	1	0	0	0	0
ENSG00000228352.2	RP11-537H15.3	3.29119	-1.9774	7.68616	0.0121497	0.0524771	1	1	1	1	0	0	0	0
ENSG00000172061.9	LRRC15	3.2911	-2.27116	5.2604	0.0334206	0.113891	2	1	1	0	0	0	0	0
ENSG00000235631.2	RNF148	3.2908	-2.09618	6.27876	0.0215037	0.0814738	1	0	2	1	0	0	0	0
ENSG00000163263.7	C1orf189	3.2907	-2.22551	5.15006	0.0351125	0.117986	2	0	2	0	0	0	0	0
ENSG00000280387.1	RP5-1153D9.5	3.2907	-2.27117	5.2666	0.0333283	0.113716	2	0	2	0	0	0	0	0
ENSG00000104237.11	RP1	3.28946	-2.36738	5.57014	0.0291454	0.102946	0	2	1	1	0	0	0	0
ENSG00000282757.4	DUXB	3.28908	-2.2712	5.27763	0.0331648	0.113256	0	1	2	1	0	0	0	0
ENSG00000228629.2	AC092295.4	3.28907	-2.3186	5.6921	0.027635	0.0987549	0	1	2	1	0	0	0	0
ENSG00000100453.13	GZMB	3.28901	-2.13803	5.46869	0.0304731	0.106378	1	1	2	0	0	0	0	0
ENSG00000229990.3	RP11-574K11.8	3.28899	-2.27131	5.3365	0.0323077	0.111023	1	1	2	0	0	0	0	0
ENSG00000235013.1	COX20P2	3.28863	-2.05567	4.66121	0.0438829	0.139211	1	0	3	0	0	0	0	0
ENSG00000204790.9	BX255923.2	3.28686	-2.3186	4.89335	0.0394396	0.128578	0	1	3	0	0	0	0	0
ENSG00000261210.8	CLEC19A	3.28686	-2.31863	4.9034	0.0392593	0.128156	0	1	3	0	0	0	0	0
ENSG00000242540.3	AC010729.1	3.27767	-1.76541	11.9482	0.00225102	0.0135713	5	2	1	4	1	0	0	0
ENSG00000277837.1	RP11-714M23.2	3.27453	-1.93953	9.55366	0.00534635	0.0273391	3	5	1	3	1	0	0	0
ENSG00000256091.1	MTRF1LP1	3.2677	-1.67025	8.13048	0.0092952	0.0425352	0	3	7	2	1	0	0	0
ENSG00000201185.1	RNA5SP202	3.26731	-1.97679	9.93577	0.00463289	0.0243658	2	3	1	6	0	0	0	1
ENSG00000267469.1	AC005944.2	3.25339	0.749755	21.2797	0.00019092	0.00186311	43	85	29	44	0	24	0	0
ENSG00000235079.1	ZRANB2-AS1	3.16653	-1.07345	7.90328	0.0101845	0.0457576	0	17	4	13	0	0	0	4
ENSG00000269032.1	AC016629.7	3.15789	-1.86741	7.09139	0.0142247	0.0592725	6	0	2	3	1	0	0	0
ENSG00000129167.10	TPH1	3.13807	-0.0928688	43.047	1.3563e-06	4.21072e-05	16	14	12	13	2	0	2	3
ENSG00000206588.1	RNU1-28P	3.13713	2.02419	36.4701	4.48968e-06	0.000102132	52	61	57	207	16	7	12	16
ENSG00000206596.1	RNU1-27P	3.13713	2.02419	36.4701	4.48968e-06	0.000102132	52	61	57	207	16	7	12	16
ENSG00000206652.1	RNU1-1	3.13713	2.02419	36.4701	4.48968e-06	0.000102132	52	61	57	207	16	7	12	16
ENSG00000206737.1	RNVU1-18	3.13713	2.02419	36.4701	4.48968e-06	0.000102132	52	61	57	207	16	7	12	16
ENSG00000207005.1	RNU1-2	3.13713	2.02419	36.4701	4.48968e-06	0.000102132	52	61	57	207	16	7	12	16
ENSG00000207389.1	RNU1-4	3.13713	2.02419	36.4701	4.48968e-06	0.000102132	52	61	57	207	16	7	12	16
ENSG00000207513.1	RNU1-3	3.13713	2.02419	36.4701	4.48968e-06	0.000102132	52	61	57	207	16	7	12	16
ENSG00000273768.1	RNVU1-29	3.13713	2.02419	36.4701	4.48968e-06	0.000102132	52	61	57	207	16	7	12	16
ENSG00000285953.1	CTB-161K23.3	3.10399	1.70512	25.1205	5.14749e-05	0.00066655	113	70	28	71	4	34	0	0
ENSG00000163082.10	SGPP2	3.09527	2.00988	99.3981	1.30331e-09	5.63784e-07	65	64	65	104	6	12	9	14
ENSG00000172568.5	FNDC9	3.02964	-2.01556	6.91747	0.0153049	0.0627451	3	1	0	6	0	0	1	0
ENSG00000258012.1	RP11-603K19.1	3.02764	-2.05505	6.16977	0.0211137	0.0803592	1	0	1	8	1	0	0	0
ENSG00000270062.1	RP11-248J18.3	3.02604	-1.83276	9.62031	0.00521365	0.0267991	4	1	2	3	0	0	1	0
ENSG00000174500.13	GCSAM	3.02462	-1.90302	8.36293	0.0084734	0.039626	5	2	2	1	0	0	1	0
ENSG00000259711.1	CTD-3032H12.2	3.01821	-1.79882	7.31855	0.0129391	0.0551193	0	3	4	3	1	0	0	0
ENSG00000230358.5	SPDYE21	3.00981	-1.977	8.47529	0.00810525	0.0381882	3	2	2	3	0	1	0	0
ENSG00000281000.1	SNORD3D	2.94814	1.64757	23.8894	6.95638e-05	0.000845389	21	66	72	135	0	23	0	21
ENSG00000271723.5	MROH7-TTC4	2.94073	-1.70059	7.63253	0.0113696	0.0498522	4	5	0	7	0	2	0	0
ENSG00000173080.6	RXFP4	2.92765	-2.22538	3.43607	0.0794193	0.214257	0	0	0	3	0	0	0	0
ENSG00000286365.1	KB-1440D3.21	2.92765	-2.22527	3.30917	0.0847306	0.225181	0	0	0	3	0	0	0	0
ENSG00000166368.3	OR2D2	2.9276	-2.36752	3.98866	0.06037	0.175065	1	0	0	2	0	0	0	0
ENSG00000010438.17	PRSS3	2.92757	-2.27126	4.03265	0.0590958	0.172889	1	0	0	2	0	0	0	0
ENSG00000123612.16	ACVR1C	2.92755	-2.22552	3.47606	0.0778266	0.211218	1	0	0	2	0	0	0	0
ENSG00000254880.1	PKNOX2-AS1	2.92749	-2.31863	4.21047	0.0542509	0.162196	2	0	0	1	0	0	0	0
ENSG00000271064.1	RP11-792A8.3	2.92749	-2.31845	3.6971	0.0696655	0.194466	2	0	0	1	0	0	0	0
ENSG00000284484.1	RP11-490B18.9	2.92739	-2.31863	3.63969	0.0716852	0.198719	3	0	0	0	0	0	0	0
ENSG00000226816.3	AC005082.12	2.92579	-2.36755	3.99751	0.0601113	0.174711	0	1	0	2	0	0	0	0
ENSG00000184601.11	C14orf180	2.92579	-2.36753	3.9888	0.060366	0.175065	0	1	0	2	0	0	0	0
ENSG00000225071.1	RPS26P58	2.92578	-2.31856	4.17494	0.0551811	0.164323	0	1	0	2	0	0	0	0
ENSG00000213214.5	ARHGEF35	2.92578	-2.27137	4.07476	0.0579049	0.170252	0	1	0	2	0	0	0	0
ENSG00000229116.3	RP11-20J15.3	2.92577	-2.22561	3.49693	0.0770103	0.209742	0	1	0	2	0	0	0	0
ENSG00000119411.11	BSPRY	2.92569	-2.41815	4.46571	0.0480725	0.148494	1	1	0	1	0	0	0	0
ENSG00000243287.2	RPS17P14	2.92569	-2.41805	4.41488	0.0492357	0.150905	1	1	0	1	0	0	0	0
ENSG00000272254.1	RP11-531A24.7	2.92569	-2.41814	4.46082	0.048183	0.148712	1	1	0	1	0	0	0	0
ENSG00000235731.3	LINC02250	2.92569	-2.36755	4.51272	0.0470247	0.146328	1	1	0	1	0	0	0	0
ENSG00000286593.1	RP11-757O6.8	2.92569	-2.36755	4.51272	0.0470247	0.146328	1	1	0	1	0	0	0	0
ENSG00000235962.5	RPL7AP53	2.92569	-2.36754	4.50799	0.047129	0.14657	1	1	0	1	0	0	0	0
ENSG00000219298.1	RP11-472G23.3	2.92569	-2.36753	4.50163	0.0472696	0.146875	1	1	0	1	0	0	0	0
ENSG00000267659.5	LINC01482	2.92569	-2.36753	4.50163	0.0472696	0.146875	1	1	0	1	0	0	0	0
ENSG00000251340.1	MTCYBP35	2.92569	-2.36745	4.45712	0.0482669	0.14884	1	1	0	1	0	0	0	0
ENSG00000253793.1	RP11-293D9.2	2.92569	-2.31866	4.22172	0.05396	0.161571	1	1	0	1	0	0	0	0
ENSG00000187912.12	CLEC17A	2.92569	-2.31857	4.74542	0.0422081	0.135149	1	1	0	1	0	0	0	0
ENSG00000264673.1	RP11-92B11.3	2.92567	-2.22552	3.14174	0.0923868	0.24014	1	1	0	1	0	0	0	0
ENSG00000224315.2	RPL7P7	2.92559	-2.36754	3.99435	0.0602033	0.174886	2	1	0	0	0	0	0	0
ENSG00000276945.1	CTC-436P18.5	2.92559	-2.36746	3.95927	0.0612392	0.176918	2	1	0	0	0	0	0	0
ENSG00000196131.6	VN1R2	2.92559	-2.31864	3.75933	0.0675498	0.190268	2	1	0	0	0	0	0	0
ENSG00000133063.16	CHIT1	2.92537	-2.36753	3.98996	0.0603318	0.175027	0	0	1	2	0	0	0	0
ENSG00000196460.14	RFX8	2.92537	-2.36753	3.98996	0.0603318	0.175027	0	0	1	2	0	0	0	0
ENSG00000249526.1	CTB-35F21.1	2.92537	-2.36745	3.95495	0.061368	0.177154	0	0	1	2	0	0	0	0
ENSG00000181656.7	GPR88	2.92527	-2.41815	4.46728	0.0480371	0.14846	1	0	1	1	0	0	0	0
ENSG00000226545.1	RP4-633I8.3	2.92527	-2.41815	4.46728	0.0480371	0.14846	1	0	1	1	0	0	0	0
ENSG00000233117.4	LINC00702	2.92527	-2.41815	4.46728	0.0480371	0.14846	1	0	1	1	0	0	0	0
ENSG00000250948.1	RP11-1079K10.2	2.92527	-2.41815	4.46728	0.0480371	0.14846	1	0	1	1	0	0	0	0
ENSG00000270722.1	RNVU1-31	2.92527	-2.41806	4.4164	0.0492004	0.150843	1	0	1	1	0	0	0	0
ENSG00000276704.1	RP11-128N14.4	2.92527	-2.36754	4.50323	0.0472341	0.146798	1	0	1	1	0	0	0	0
ENSG00000232579.1	MTCO1P27	2.92526	-2.27135	3.92496	0.062272	0.179136	1	0	1	1	0	0	0	0
ENSG00000175967.4	LINC02880	2.92517	-2.31866	4.2181	0.0540534	0.16178	2	0	1	0	0	0	0	0
ENSG00000251689.1	RP11-478C6.5	2.92389	-2.27129	4.5663	0.0458622	0.143647	0	2	0	1	0	0	0	0
ENSG00000249577.1	CTD-2195M15.1	2.92389	-2.31865	3.76035	0.0675156	0.190215	0	2	0	1	0	0	0	0
ENSG00000165553.5	NGB	2.92388	-2.36755	3.99422	0.0602071	0.174886	0	2	0	1	0	0	0	0
ENSG00000260838.3	RP11-531A24.3	2.92348	-2.13789	4.30937	0.0517545	0.156593	0	1	1	1	0	0	0	0
ENSG00000244128.7	LINC01322	2.92348	-2.2256	4.53972	0.0464347	0.14495	0	1	1	1	0	0	0	0
ENSG00000287937.1	RP11-67L14.2	2.92347	-2.27131	4.57392	0.0456996	0.143203	0	1	1	1	0	0	0	0
ENSG00000180999.11	C1orf105	2.92347	-2.3186	4.19153	0.0547445	0.163302	0	1	1	1	0	0	0	0
ENSG00000287044.1	RP3-466I7.2	2.92347	-2.31864	3.63859	0.0717245	0.198788	0	1	1	1	0	0	0	0
ENSG00000250037.1	RP11-480D4.4	2.92346	-2.41817	4.46929	0.0479918	0.148403	0	1	1	1	0	0	0	0
ENSG00000254777.5	AC022182.1	2.92346	-2.41808	4.42312	0.0490449	0.1506	0	1	1	1	0	0	0	0
ENSG00000283697.3	HSFX3	2.92346	-2.41819	4.48083	0.0477326	0.147965	0	1	1	1	0	0	0	0
ENSG00000284709.1	CTD-2240J17.5	2.92346	-2.41817	4.46929	0.0479918	0.148403	0	1	1	1	0	0	0	0
ENSG00000287997.1	RP11-234G16.6	2.92346	-2.41817	4.4742	0.0478813	0.148244	0	1	1	1	0	0	0	0
ENSG00000153266.13	FEZF2	2.92339	-2.1379	4.15454	0.0557236	0.165402	1	1	1	0	0	0	0	0
ENSG00000259782.2	CTD-2270L9.2	2.92338	-2.27121	4.52652	0.0467222	0.145599	1	1	1	0	0	0	0	0
ENSG00000258527.1	ASB9P1	2.92336	-2.36757	3.9994	0.060056	0.174611	1	1	1	0	0	0	0	0
ENSG00000242551.2	POU5F1P6	2.92336	-2.36758	4.52183	0.0468247	0.145853	1	1	1	0	0	0	0	0
ENSG00000100122.7	CRYBB1	2.92336	-2.41818	4.47458	0.0478728	0.148239	1	1	1	0	0	0	0	0
ENSG00000228495.2	LINC01013	2.92336	-2.41808	4.42349	0.0490364	0.15059	1	1	1	0	0	0	0	0
ENSG00000267628.1	RP11-1136J12.1	2.92336	-2.41818	4.47458	0.0478728	0.148239	1	1	1	0	0	0	0	0
ENSG00000225655.5	RP11-58A12.3	2.92306	-2.22561	4.01913	0.0594842	0.173644	0	0	2	1	0	0	0	0
ENSG00000283654.3	LMLN2	2.92306	-2.27128	4.03678	0.0589776	0.172655	0	0	2	1	0	0	0	0
ENSG00000278983.1	RP11-426J5.3	2.92305	-2.31858	3.73569	0.0683446	0.191869	0	0	2	1	0	0	0	0
ENSG00000231965.4	AF131215.1	2.92305	-2.31866	3.76235	0.067449	0.190097	0	0	2	1	0	0	0	0
ENSG00000262003.1	RP11-676J12.7	2.92305	-2.31867	3.7655	0.0673443	0.189988	0	0	2	1	0	0	0	0
ENSG00000261783.1	RP11-252K23.2	2.92297	-2.22561	4.01942	0.0594758	0.173644	1	0	2	0	0	0	0	0
ENSG00000280304.1	CTD-2536I1.2	2.92297	-2.22563	3.49927	0.0769192	0.209597	1	0	2	0	0	0	0	0
ENSG00000288000.1	RP1-138B7.8	2.92206	-1.97779	3.28135	0.0859498	0.227575	0	3	0	0	0	0	0	0
ENSG00000257910.1	RP11-461F16.3	2.9216	-2.22563	4.02353	0.0593572	0.17337	0	2	1	0	0	0	0	0
ENSG00000237934.1	RP11-467D18.2	2.92157	-2.3186	3.73928	0.0682231	0.191635	0	2	1	0	0	0	0	0
ENSG00000221963.6	APOL6	2.92157	-2.31871	3.77658	0.0669768	0.189229	0	2	1	0	0	0	0	0
ENSG00000272354.1	RP11-307L14.2	2.92156	-2.36748	3.96193	0.0611598	0.1768	0	2	1	0	0	0	0	0
ENSG00000253659.2	RP11-1114I9.1	2.92115	-2.31862	4.19385	0.0546837	0.163191	0	1	2	0	0	0	0	0
ENSG00000228496.1	AC106875.1	2.92114	-2.3676	4.01082	0.0597241	0.173994	0	1	2	0	0	0	0	0
ENSG00000271874.1	CTD-2024P10.2	2.88031	-1.79897	8.0603	0.00956036	0.0435112	3	2	1	3	0	0	1	0
ENSG00000176678.6	FOXL1	2.87867	-1.83264	6.06032	0.0221544	0.0833415	2	1	3	3	0	0	1	0
ENSG00000279670.1	RP11-70L8.5	2.87773	-1.90323	7.15873	0.0138294	0.0579805	0	3	2	4	0	0	1	0
ENSG00000151882.11	CCL28	2.87729	-1.97731	8.35948	0.00848499	0.0396601	2	2	3	2	0	0	1	0
ENSG00000240808.1	CTD-3236F5.1	2.87166	-2.0157	6.98336	0.0148853	0.0614202	1	1	6	1	1	0	0	0
ENSG00000272958.1	CMP21-97G8.2	2.86846	-2.13751	6.81558	0.0172118	0.0687305	5	1	2	1	0	0	0	1
ENSG00000278901.1	AC005609.17	2.86702	-2.01553	5.66856	0.026377	0.0952579	1	0	2	6	0	1	0	0
ENSG00000275215.1	RNA5-8SN3	2.86268	3.24801	40.5533	2.10274e-06	5.83311e-05	126	151	148	482	43	33	35	38
ENSG00000277739.1	5_8S_rRNA	2.86268	3.24801	40.5533	2.10274e-06	5.83311e-05	126	151	148	482	43	33	35	38
ENSG00000278189.1	RNA5-8SN1	2.86268	3.24801	40.5533	2.10274e-06	5.83311e-05	126	151	148	482	43	33	35	38
ENSG00000278233.1	RNA5-8SN2	2.86268	3.24801	40.5533	2.10274e-06	5.83311e-05	126	151	148	482	43	33	35	38
ENSG00000259275.4	RP11-522B15.3	2.85711	-1.46983	10.84	0.00332796	0.0186734	1	4	5	5	0	1	1	0
ENSG00000081985.13	IL12RB2	2.85572	-1.5241	13.238	0.00145449	0.00957414	4	5	4	2	1	1	0	0
ENSG00000163395.17	IGFN1	2.8143	-0.919404	10.0729	0.00440298	0.0233608	22	6	4	0	1	0	2	2
ENSG00000248710.1	RP11-432B6.3	2.81126	0.850351	13.975	0.00114256	0.00793176	0	32	46	39	0	14	0	5
ENSG00000268995.1	VN1R82P	2.78077	-1.79841	4.31725	0.0496301	0.151724	14	0	0	0	2	0	0	0
ENSG00000272431.1	ZNF454-DT	2.76581	-1.61005	11.2666	0.00285775	0.0164861	3	3	2	6	1	0	0	1
ENSG00000256341.1	RP11-21A7A.3	2.75107	-1.83218	5.72159	0.025756	0.0935152	0	9	1	4	0	0	0	2
ENSG00000249967.1	RP11-548K23.11	2.72011	-2.1808	5.56413	0.0292221	0.103178	2	0	2	4	0	0	1	0
ENSG00000168398.7	BDKRB2	2.71796	-1.93996	4.79743	0.0394149	0.128543	4	0	3	1	0	0	1	0
ENSG00000227279.1	AC015933.2	2.71733	-2.0554	5.6152	0.0270189	0.0969565	2	3	1	2	0	0	1	0
ENSG00000147689.16	FAM83A	2.71666	-2.05528	6.37387	0.0193157	0.07499	2	1	3	2	0	0	1	0
ENSG00000263508.6	RP11-963H4.3	2.71584	-2.18081	5.55126	0.0293873	0.103642	2	4	0	2	1	0	0	0
ENSG00000201998.1	SNORA23	2.71558	-2.09599	6.10622	0.0217111	0.0820576	1	3	2	2	0	0	1	0
ENSG00000259380.6	RP11-346D14.1	2.71355	-2.09598	5.89542	0.0238321	0.0878783	3	3	2	0	1	0	0	0
ENSG00000251537.4	RP11-385D13.1	2.71287	-2.13771	5.05722	0.0348921	0.117374	1	6	0	1	1	0	0	0
ENSG00000200320.1	SNORA63	2.71268	-1.52409	8.47331	0.00811158	0.0381985	1	2	11	5	2	0	0	1
ENSG00000243888.1	RP11-548B3.3	2.71265	-2.0158	4.2686	0.0508227	0.154533	2	0	6	0	0	0	1	0
ENSG00000049249.9	TNFRSF9	2.70986	-2.01556	5.55622	0.0277489	0.0990496	4	0	1	3	0	0	0	1
ENSG00000213976.4	CTD-2561J22.2	2.70868	-2.09552	3.97423	0.0587727	0.172182	1	0	0	7	0	1	0	0
ENSG00000276188.1	RP11-173P15.10	2.70861	-1.9032	4.89177	0.0377002	0.124357	1	1	1	5	0	0	0	1
ENSG00000204556.4	CTD-2514C3.1	2.70825	-2.1376	5.88417	0.0239516	0.0882249	5	1	1	1	0	0	0	1
ENSG00000201321.1	RNA5S9	2.70704	-1.46869	6.92269	0.0152712	0.0626495	3	1	2	13	0	1	0	2
ENSG00000256442.2	RP11-705C15.4	2.70691	-2.05508	6.21381	0.0207105	0.0792058	3	2	1	2	0	0	0	1
ENSG00000151615.3	POU4F2	2.704	-1.79912	4.6794	0.0416855	0.133968	2	3	2	1	0	0	0	1
ENSG00000264701.1	RP11-6N17.10	2.70271	-1.86727	4.73569	0.0405847	0.131306	0	5	1	2	0	0	0	1
ENSG00000248254.1	AC092597.3	2.70256	-2.01573	5.28647	0.0313817	0.10856	1	5	1	1	0	0	0	1
ENSG00000229348.1	HYI-AS1	2.70245	-1.977	5.411	0.0296422	0.104328	0	3	1	4	0	1	0	0
ENSG00000233290.3	RP11-147G16.1	2.6998	-1.86757	6.03895	0.0223641	0.0839412	3	1	4	0	0	1	0	0
ENSG00000233928.6	RP11-305F18.1	2.69812	-2.18071	5.41935	0.0311438	0.108047	2	2	4	0	0	1	0	0
ENSG00000280169.1	RP11-151A6.6	2.69695	-1.97733	4.69304	0.0414158	0.133294	0	3	4	1	0	1	0	0
ENSG00000188124.4	OR2AG2	2.6902	-1.17984	15.1822	0.000778608	0.00578523	4	6	7	7	1	1	2	0
ENSG00000091010.6	POU4F3	2.66258	-1.61004	8.02149	0.0097106	0.0440357	8	1	1	3	1	1	0	0
ENSG00000256928.1	RP11-809N8.2	2.66157	-1.15699	4.52189	0.0449491	0.141475	6	18	0	0	0	4	0	0
ENSG00000277209.1	RPPH1	2.64575	1.38319	37.0663	4.00546e-06	9.35791e-05	52	38	32	105	13	6	8	16
ENSG00000157017.16	GHRL	2.58173	-1.22443	11.9757	0.00222972	0.0134811	8	3	2	9	2	0	2	0
ENSG00000168621.15	GDNF	2.57277	-0.669076	14.5656	0.000945425	0.00677734	13	9	8	7	5	2	0	0
ENSG00000253966.1	CTC-455F18.3	2.56962	-1.31748	8.76689	0.0072297	0.0349652	4	2	4	7	3	0	0	0
ENSG00000267580.1	CTD-2540B15.11	2.56915	-0.428498	21.2776	0.000135731	0.00141586	10	12	20	5	4	3	2	0
ENSG00000280165.1	PCDH20	2.5675	-1.52387	7.32392	0.0129104	0.0550509	5	0	3	9	1	0	1	1
ENSG00000281371.1	INE2	2.56396	-1.44331	3.90807	0.0607487	0.175942	11	0	1	0	0	0	2	0
ENSG00000244921.2	MTCYBP18	2.55991	-1.76567	6.92683	0.0152445	0.0625715	5	3	1	3	2	0	0	0
ENSG00000186628.12	FSD2	2.55863	-1.27056	9.2992	0.00588841	0.0296455	2	9	3	3	1	0	1	1
ENSG00000231940.1	RPS7P3	2.55778	-1.63997	6.18522	0.0209712	0.079982	6	4	1	1	2	0	0	0
ENSG00000287296.1	CTC-250I14.7	2.54981	-0.50889	4.03242	0.0570949	0.168372	21	21	0	0	0	4	0	4
ENSG00000271367.1	RP3-483K16.4	2.54158	-2.09594	3.71073	0.0671095	0.189546	1	0	0	6	0	0	1	0
ENSG00000285879.1	RP11-342K2.2	2.53795	-2.18085	4.72886	0.0407165	0.13164	4	1	0	2	1	0	0	0
ENSG00000272144.1	CTD-2035E11.5	2.53793	-1.9774	6.10337	0.0217384	0.082127	2	1	1	3	0	0	1	0
ENSG00000274667.1	RP11-31H5.3	2.53757	-1.93955	4.30155	0.0500113	0.15257	2	0	2	3	0	0	1	0
ENSG00000260672.1	RP11-1006G14.1	2.53631	-2.09596	4.49581	0.0455169	0.14284	4	2	0	1	1	0	0	0
ENSG00000167880.8	EVPL	2.53599	-2.13783	5.29749	0.0312232	0.108157	4	1	1	1	1	0	0	0
ENSG00000243417.1	RPS3AP18	2.53499	-2.01586	5.39977	0.0297945	0.104758	0	3	1	3	0	0	1	0
ENSG00000263177.1	MTND1P8	2.53384	-2.18096	4.09835	0.0552597	0.16443	0	5	0	2	0	0	1	0
ENSG00000253190.4	AC084082.3	2.53119	-2.05542	4.91701	0.0372559	0.12348	0	3	3	1	0	0	1	0
ENSG00000148680.16	HTR7	2.53116	-2.13791	5.61837	0.0269803	0.0968972	1	3	2	1	1	0	0	0
ENSG00000171873.8	ADRA1D	2.53078	-1.93978	6.05873	0.0221698	0.0833702	1	2	3	1	1	0	0	0
ENSG00000143167.12	GPA33	2.53074	-2.13789	4.53039	0.0447659	0.141011	2	2	3	0	1	0	0	0
ENSG00000168454.12	TXNDC2	2.53048	-1.94	4.86718	0.0381389	0.125421	0	1	5	1	0	0	1	0
ENSG00000198570.7	RD3	2.52593	-2.22514	5.02591	0.0371337	0.123208	4	1	1	1	0	0	0	1
ENSG00000230550.2	ERLNC1	2.5259	-2.05529	4.48917	0.0456629	0.14312	5	1	1	0	0	0	0	1
ENSG00000275665.1	CTB-58E17.9	2.52489	-2.13754	4.38088	0.0481178	0.148577	2	3	0	2	0	0	0	1
ENSG00000259319.1	RP11-293M10.6	2.52292	-2.01545	5.15132	0.0334004	0.113864	2	1	1	3	0	1	0	0
ENSG00000259010.1	NUP50P1	2.51967	-2.18078	5.42364	0.0294718	0.103875	2	3	1	1	0	1	0	0
ENSG00000240520.7	UOX	2.51947	-2.09574	5.22542	0.0322761	0.110983	1	2	2	2	0	1	0	0
ENSG00000230665.3	THAP12P1	2.51486	-2.18074	3.7545	0.0656354	0.186363	1	0	6	0	0	1	0	0
ENSG00000267448.6	AC010649.1	2.50217	-1.15688	7.19338	0.0136308	0.0573159	8	0	15	8	0	1	0	5
ENSG00000196091.15	MYBPC1	2.49812	-0.684607	6.82445	0.0159199	0.0646724	2	3	21	0	1	2	1	1
ENSG00000168329.14	CX3CR1	2.48741	-1.01465	12.3925	0.00193247	0.0120469	6	6	10	8	0	1	5	0
ENSG00000263585.1	RP11-498C9.13	2.48596	0.311179	5.24143	0.0320388	0.110378	14	0	45	20	0	16	0	0
ENSG00000203727.4	SAMD5	2.46741	-1.27009	10.7586	0.00342701	0.0191091	6	9	4	6	0	1	4	0
ENSG00000174038.13	C9orf131	2.46031	-0.994996	11.241	0.00288381	0.0165984	8	1	6	10	3	1	0	1
ENSG00000165972.13	CCDC38	2.44401	-1.90313	5.13557	0.033645	0.114374	2	1	1	7	1	0	1	0
ENSG00000261063.1	RP11-538I12.2	2.43959	-1.44402	3.34264	0.0811279	0.217807	7	3	1	0	0	0	2	0
ENSG00000270558.1	CTD-2124B8.2	2.43936	-1.86771	4.64719	0.0423305	0.135482	1	7	0	3	0	0	2	0
ENSG00000166159.11	LRTM2	2.43837	-1.76557	7.48322	0.0120879	0.0522653	3	2	2	4	2	0	0	0
ENSG00000263212.2	LA16c-306E5.3	2.43656	-1.20117	5.42014	0.0295189	0.104	0	5	12	8	0	0	0	5
ENSG00000284772.1	RP11-315A19.1	2.43497	-1.34202	7.2765	0.013167	0.055869	0	8	10	2	2	0	2	0
ENSG00000169313.10	P2RY12	2.43374	-2.27125	2.5492	0.126889	0.298972	0	0	0	2	0	0	0	0
ENSG00000134538.3	SLCO1B1	2.43366	-2.41825	2.89958	0.104947	0.261906	1	0	0	1	0	0	0	0
ENSG00000158553.5	POM121L2	2.43366	-2.41816	2.86959	0.106638	0.264416	1	0	0	1	0	0	0	0
ENSG00000267142.1	CTD-3162L10.5	2.43366	-2.41824	2.8967	0.105107	0.262106	1	0	0	1	0	0	0	0
ENSG00000230536.1	RP11-379C10.4	2.43366	-2.36761	2.71334	0.115992	0.280605	1	0	0	1	0	0	0	0
ENSG00000253595.6	LINC01300	2.43366	-2.36761	2.71334	0.115992	0.280605	1	0	0	1	0	0	0	0
ENSG00000286100.1	RP1-148E22.2	2.43366	-2.36754	3.03713	0.0975823	0.249467	1	0	0	1	0	0	0	0
ENSG00000263505.1	SLC25A3P3	2.43366	-2.36743	2.66603	0.119015	0.285795	1	0	0	1	0	0	0	0
ENSG00000121075.11	TBX4	2.43365	-2.31867	2.93389	0.10305	0.258747	1	0	0	1	0	0	0	0
ENSG00000166796.12	LDHC	2.43364	-2.27116	2.72958	0.114976	0.279282	1	0	0	1	0	0	0	0
ENSG00000251791.1	SCARNA6	2.43355	-2.31863	2.60241	0.123228	0.293053	2	0	0	0	0	0	0	0
ENSG00000145107.16	TM4SF19	2.43352	-2.18108	2.49594	0.130685	0.305267	2	0	0	0	0	0	0	0
ENSG00000250033.5	SLC7A11-AS1	2.43297	-1.83285	6.86875	0.0156237	0.0636883	2	3	5	1	2	0	0	0
ENSG00000205100.2	HSP90AA4P	2.43176	-2.41817	2.87003	0.106613	0.264407	0	1	0	1	0	0	0	0
ENSG00000225581.3	TRIM53AP	2.43176	-2.41818	2.87383	0.106397	0.264203	0	1	0	1	0	0	0	0
ENSG00000226161.1	EIF4A1P5	2.43176	-2.41827	2.90394	0.104703	0.261475	0	1	0	1	0	0	0	0
ENSG00000230039.1	CCNYL5	2.43176	-2.41827	2.90394	0.104703	0.261475	0	1	0	1	0	0	0	0
ENSG00000267344.1	CTB-39G8.3	2.43176	-2.41826	2.90105	0.104864	0.261759	0	1	0	1	0	0	0	0
ENSG00000241651.4	RP11-214O14.1	2.43176	-2.36766	3.0742	0.0957028	0.245874	0	1	0	1	0	0	0	0
ENSG00000260035.1	CTD-2651B20.6	2.43176	-2.36766	3.0742	0.0957028	0.245874	0	1	0	1	0	0	0	0
ENSG00000237595.5	LINC01275	2.43176	-2.36765	2.72024	0.115559	0.279924	0	1	0	1	0	0	0	0
ENSG00000279118.1	RP11-517I3.2	2.43176	-2.36765	2.72024	0.115559	0.279924	0	1	0	1	0	0	0	0
ENSG00000286785.1	LINC01622	2.43176	-2.27109	2.32116	0.144137	0.326603	0	1	0	1	0	0	0	0
ENSG00000163131.12	CTSS	2.43176	-2.09621	3.02102	0.0984124	0.251064	0	1	0	1	0	0	0	0
ENSG00000186334.10	SLC36A3	2.43166	-2.41816	2.86745	0.10676	0.264502	1	1	0	0	0	0	0	0
ENSG00000224365.1	RP11-252P18.1	2.43166	-2.41818	2.87407	0.106384	0.264194	1	1	0	0	0	0	0	0
ENSG00000233121.1	VN1R20P	2.43166	-2.41817	2.87027	0.1066	0.264407	1	1	0	0	0	0	0	0
ENSG00000273096.1	RP3-508I15.20	2.43166	-2.41818	2.87407	0.106384	0.264194	1	1	0	0	0	0	0	0
ENSG00000287631.1	CTB-161A2.8	2.43166	-2.41828	2.90418	0.10469	0.261475	1	1	0	0	0	0	0	0
ENSG00000229336.1	SREK1IP1P1	2.43166	-2.36764	2.71961	0.115599	0.279971	1	1	0	0	0	0	0	0
ENSG00000224061.1	SRSF3P4	2.43166	-2.36758	2.70317	0.116634	0.28174	1	1	0	0	0	0	0	0
ENSG00000241933.1	DENND6A-DT	2.43166	-2.36756	3.04232	0.0973167	0.249003	1	1	0	0	0	0	0	0
ENSG00000287721.1	CTD-2008P7.11	2.43166	-2.36756	3.04232	0.0973167	0.249003	1	1	0	0	0	0	0	0
ENSG00000230306.1	BANF1P2	2.43166	-2.22562	2.79078	0.11124	0.27261	1	1	0	0	0	0	0	0
ENSG00000273691.1	RP11-617F23.2	2.43132	-2.31875	2.54481	0.127197	0.299468	0	0	1	1	0	0	0	0
ENSG00000274695.1	RP11-21K12.3	2.43132	-2.36755	3.03912	0.0974803	0.249376	0	0	1	1	0	0	0	0
ENSG00000278588.2	H2BC10	2.43132	-2.36756	2.6974	0.117	0.282328	0	0	1	1	0	0	0	0
ENSG00000223850.1	MYCNUT	2.43132	-2.36759	2.70379	0.116595	0.281669	0	0	1	1	0	0	0	0
ENSG00000188937.6	NYX	2.43132	-2.36767	2.72591	0.115205	0.279579	0	0	1	1	0	0	0	0
ENSG00000220614.1	RP11-480N24.4	2.43132	-2.36768	2.72917	0.115001	0.279282	0	0	1	1	0	0	0	0
ENSG00000163632.14	C3orf49	2.43132	-2.41818	2.8748	0.106342	0.264161	0	0	1	1	0	0	0	0
ENSG00000187080.10	OR2AK2	2.43132	-2.41826	2.89817	0.105026	0.261958	0	0	1	1	0	0	0	0
ENSG00000227659.1	CLYBL-AS2	2.43132	-2.41826	2.89817	0.105026	0.261958	0	0	1	1	0	0	0	0
ENSG00000251633.3	GYG1P1	2.43132	-2.41817	2.871	0.106558	0.264407	0	0	1	1	0	0	0	0
ENSG00000254923.1	RP11-1236K1.8	2.43122	-2.2256	3.29162	0.0854972	0.226723	1	0	1	0	0	0	0	0
ENSG00000229015.2	RP11-265D19.6	2.43122	-2.31866	2.93073	0.103223	0.259044	1	0	1	0	0	0	0	0
ENSG00000173626.10	TRAPPC3L	2.43122	-2.31879	2.63909	0.120778	0.288811	1	0	1	0	0	0	0	0
ENSG00000253175.1	RP11-267M23.6	2.43122	-2.36754	2.69287	0.117289	0.282728	1	0	1	0	0	0	0	0
ENSG00000237640.1	RP4-604G5.1	2.43122	-2.36765	2.72045	0.115546	0.279924	1	0	1	0	0	0	0	0
ENSG00000186471.13	AKAP14	2.43122	-2.41819	2.87504	0.106329	0.264159	1	0	1	0	0	0	0	0
ENSG00000260452.1	TPRKBP2	2.43122	-2.41828	2.90517	0.104635	0.261374	1	0	1	0	0	0	0	0
ENSG00000261618.2	LINC02605	2.43122	-2.41816	2.86841	0.106705	0.26447	1	0	1	0	0	0	0	0
ENSG00000270775.1	AP000436.4	2.43122	-2.41817	2.87123	0.106545	0.264404	1	0	1	0	0	0	0	0
ENSG00000271776.1	RP11-52L5.6	2.43015	-1.76534	6.20673	0.0207747	0.0793747	5	4	0	2	1	0	0	1
ENSG00000260750.7	RP11-482M8.4	2.42979	-2.22563	2.49936	0.130437	0.304907	0	2	0	0	0	0	0	0
ENSG00000270133.1	CTC-303L1.2	2.42978	-2.27139	2.49307	0.130893	0.305623	0	2	0	0	0	0	0	0
ENSG00000250075.7	RP11-584P21.2	2.42976	-2.36768	2.72656	0.115164	0.279531	0	2	0	0	0	0	0	0
ENSG00000255151.2	GLYATL1B	2.42976	-2.36768	2.72656	0.115164	0.279531	0	2	0	0	0	0	0	0
ENSG00000213424.9	KRT222	2.42936	-2.18134	2.84984	0.10777	0.266531	0	1	1	0	0	0	0	0
ENSG00000248559.1	RP11-215P8.3	2.42935	-2.22552	3.26106	0.0868519	0.229196	0	1	1	0	0	0	0	0
ENSG00000213434.2	VTI1BP2	2.42935	-2.22574	2.82036	0.109485	0.269695	0	1	1	0	0	0	0	0
ENSG00000220157.4	HNRNPA1P12	2.42932	-2.41829	2.90667	0.104551	0.261213	0	1	1	0	0	0	0	0
ENSG00000232053.7	AC009784.3	2.42932	-2.41829	2.90667	0.104551	0.261213	0	1	1	0	0	0	0	0
ENSG00000232352.1	SEMA3B-AS1	2.42932	-2.41829	2.90667	0.104551	0.261213	0	1	1	0	0	0	0	0
ENSG00000232709.1	MARK2P9	2.42932	-2.41829	2.90667	0.104551	0.261213	0	1	1	0	0	0	0	0
ENSG00000239856.3	RN7SL225P	2.42932	-2.41818	2.87266	0.106463	0.264273	0	1	1	0	0	0	0	0
ENSG00000258583.7	LINC01500	2.42932	-2.41819	2.87549	0.106303	0.264135	0	1	1	0	0	0	0	0
ENSG00000226393.1	IFNA20P	2.42892	-2.22574	2.52163	0.128837	0.302148	0	0	2	0	0	0	0	0
ENSG00000230650.1	AC112229.1	2.42615	-1.79881	5.74044	0.0255391	0.0928376	0	5	3	3	0	0	1	1
ENSG00000259672.3	RP11-69G7.1	2.42572	-1.86745	7.07413	0.014328	0.0595243	3	4	1	3	1	1	0	0
ENSG00000230262.8	LINC02603	2.42334	0.861785	17.1101	0.000433966	0.00362752	52	38	20	31	13	11	5	2
ENSG00000226306.6	NPY6R	2.42027	-1.90287	5.7774	0.02512	0.0916267	5	2	2	2	0	0	0	2
ENSG00000257411.2	RP11-603J24.9	2.35531	1.55407	10.8065	0.00336831	0.0188501	74	50	27	58	1	46	0	0
ENSG00000095596.12	CYP26A1	2.33177	0.493168	10.4312	0.00385947	0.0209632	3	16	49	14	1	5	11	2
ENSG00000142583.18	SLC2A5	2.3311	-2.27117	3.85963	0.0642947	0.183638	3	0	1	2	0	0	1	0
ENSG00000270409.1	RP11-44D5.1	2.33108	-2.01586	3.79282	0.0643751	0.183826	2	0	0	4	1	0	0	0
ENSG00000133800.9	LYVE1	2.33094	-2.09586	3.50782	0.074458	0.204656	3	0	1	2	0	0	1	0
ENSG00000249558.1	RCC2P4	2.32973	-2.18102	3.63845	0.0696273	0.194455	3	2	0	1	0	0	1	0
ENSG00000170790.6	OR10A2	2.32962	-2.13791	3.61598	0.0704321	0.195991	1	1	0	4	1	0	0	0
ENSG00000286782.1	RP11-392A14.12	2.3295	-2.09611	4.07005	0.0560389	0.166036	2	1	0	3	1	0	0	0
ENSG00000254416.6	LINC02732	2.32946	-1.93992	4.19154	0.0527788	0.158962	0	1	1	4	0	0	1	0
ENSG00000278330.1	RP11-4B16.4	2.32808	-2.18095	3.50866	0.0744255	0.204615	3	3	0	0	0	0	1	0
ENSG00000280078.1	RP11-361H10.5	2.32789	-2.18107	4.16679	0.0534249	0.160368	1	2	1	2	0	0	1	0
ENSG00000274093.1	RP11-140H17.2	2.32764	-2.22544	3.99834	0.0580709	0.170612	0	1	2	3	0	0	1	0
ENSG00000225850.3	RP11-452K12.4	2.32708	-2.18106	4.02492	0.0573081	0.168874	2	0	3	1	0	0	1	0
ENSG00000102755.12	FLT1	2.32627	-2.181	3.62205	0.0702136	0.195526	2	3	0	1	1	0	0	0
ENSG00000270333.1	RP11-566F5.2	2.326	-2.18102	4.64757	0.0423228	0.135482	1	2	1	2	1	0	0	0
ENSG00000230782.1	RP11-508N12.2	2.32596	-2.09606	4.68846	0.0415062	0.133554	1	2	1	2	1	0	0	0
ENSG00000230321.1	MTCO2P27	2.32589	-2.138	4.37028	0.0483661	0.149034	2	2	1	1	1	0	0	0
ENSG00000267799.1	MAN1A2P1	2.32585	-2.27124	4.01279	0.0596672	0.173901	2	2	2	0	0	0	1	0
ENSG00000234806.1	RPL26P29	2.3258	-2.18097	4.11784	0.05473	0.163276	2	2	2	0	0	0	1	0
ENSG00000163885.12	CFAP100	2.32561	-2.18099	3.99413	0.0581926	0.17088	0	1	3	2	0	0	1	0
ENSG00000266936.1	CTC-215O4.4	2.32559	-2.138	3.80295	0.0640467	0.183137	0	1	3	2	0	0	1	0
ENSG00000214700.6	C12orf71	2.32555	-2.18104	4.6532	0.0422093	0.135149	2	1	2	1	1	0	0	0
ENSG00000270393.1	AC000095.9	2.32509	-2.13796	3.35357	0.080666	0.216802	3	0	3	0	1	0	0	0
ENSG00000266932.1	AC006116.13	2.32441	-2.09592	3.5051	0.0745626	0.204866	0	3	1	2	1	0	0	0
ENSG00000207051.1	SNORA27	2.32431	-2.13793	3.77348	0.0650079	0.185045	0	3	2	1	0	0	1	0
ENSG00000230499.1	AC108463.1	2.32428	-2.22543	3.98623	0.0584221	0.171355	2	3	1	0	1	0	0	0
ENSG00000070601.10	FRMPD1	2.32387	-2.05531	3.56967	0.0721243	0.199656	2	2	2	0	1	0	0	0
ENSG00000275227.1	ENSG10010136217.1	2.32337	-2.22543	3.44964	0.0767326	0.20913	0	0	4	2	1	0	0	0
ENSG00000151577.13	DRD3	2.32328	-2.22542	3.78987	0.0644714	0.183934	1	0	4	1	1	0	0	0
ENSG00000167183.3	PRR15L	2.32114	-2.13768	3.52624	0.0737539	0.203123	2	0	0	4	0	0	0	1
ENSG00000213630.3	BOLA3P3	2.32105	-2.18082	3.45664	0.0764548	0.208537	3	0	0	3	0	0	0	1
ENSG00000256564.1	RP11-424M22.3	2.31931	-2.22524	3.72115	0.0667551	0.18876	4	1	0	1	0	0	0	1
ENSG00000233771.2	CICP5	2.31911	-2.22514	3.86373	0.0621157	0.17876	2	0	1	3	0	0	0	1
ENSG00000179141.9	MTUS2-AS1	2.31783	-2.01523	2.44946	0.131867	0.306913	3	0	0	3	0	1	0	0
ENSG00000224586.7	GPX5	2.31779	-2.05544	3.33601	0.0814097	0.218415	3	2	0	1	0	0	0	1
ENSG00000232724.1	TRIM80P	2.31776	-2.22507	3.3888	0.0791972	0.213826	3	0	0	3	0	1	0	0
ENSG00000125997.5	BPIFB9P	2.3176	-2.0552	4.32065	0.0495479	0.151589	1	1	1	3	0	0	0	1
ENSG00000286739.1	RP11-372J12.2	2.31738	-2.22524	4.34465	0.0489723	0.150494	3	1	1	1	0	0	0	1
ENSG00000228779.1	Z69666.2	2.31561	-2.05533	5.14119	0.0335575	0.114189	1	1	2	2	0	0	0	1
ENSG00000178125.14	PPP1R42	2.31546	-2.01582	4.21802	0.0520971	0.157351	3	1	2	0	0	0	0	1
ENSG00000227175.1	RP11-214D15.2	2.31454	-2.0959	3.94257	0.0597091	0.173968	3	2	0	1	0	1	0	0
ENSG00000228127.3	LINC01649	2.31423	-2.13767	4.19433	0.0527064	0.158831	2	1	1	2	0	1	0	0
ENSG00000255014.1	ARL6IP1P3	2.31418	-2.09588	4.39157	0.0478689	0.148239	3	1	1	1	0	1	0	0
ENSG00000260391.2	RP11-71H17.7	2.3141	-1.70165	2.91542	0.101842	0.256856	3	0	0	7	0	0	2	0
ENSG00000266835.6	GAPLINC	2.31239	-2.13779	4.09438	0.0553681	0.164594	0	3	2	1	0	0	0	1
ENSG00000285658.1	CTD-2117H17.2	2.31227	-2.09594	4.5733	0.0438532	0.139145	2	1	2	1	0	1	0	0
ENSG00000114638.8	UPK1B	2.31202	-2.05537	3.30428	0.0827742	0.221219	1	0	3	2	0	1	0	0
ENSG00000258909.1	RP11-164C12.2	2.312	-2.05521	4.97161	0.0380592	0.125217	3	2	0	5	1	0	1	0
ENSG00000148488.17	ST8SIA6	2.31104	-2.22535	3.22232	0.0864221	0.228432	0	5	1	0	0	0	0	1
ENSG00000261054.1	RP11-6O2.4	2.30597	-1.67072	3.67111	0.0684764	0.192152	0	4	0	6	2	0	0	0
ENSG00000203914.4	HSP90B3P	2.30575	-1.90294	4.03995	0.0568819	0.167904	1	4	1	4	2	0	0	0
ENSG00000198704.9	GPX6	2.30568	-1.93986	5.81017	0.0247547	0.0906406	3	4	2	1	1	0	1	0
ENSG00000260908.1	CTB-134H23.3	2.30355	-1.79906	5.44185	0.0292282	0.103186	3	4	2	1	2	0	0	0
ENSG00000169507.9	SLC38A11	2.30331	-1.83303	4.41435	0.0473434	0.147072	3	2	5	0	1	0	1	0
ENSG00000203811.1	H3C14	2.30313	-1.73311	5.31699	0.0309451	0.107479	2	4	2	2	2	0	0	0
ENSG00000203852.3	H3C15	2.30313	-1.73311	5.31699	0.0309451	0.107479	2	4	2	2	2	0	0	0
ENSG00000259066.5	RP11-371E8.4	2.29894	-1.83276	3.89312	0.0612059	0.176889	1	4	5	0	2	0	0	0
ENSG00000280392.1	RP11-357N13.6	2.29893	-1.76563	6.36472	0.0193925	0.0752146	2	2	1	5	1	0	0	1
ENSG00000286651.2	PRSS43P	2.29637	-2.01557	6.1861	0.0209632	0.0799623	2	4	2	2	0	0	1	1
ENSG00000164385.9	LINC01600	2.29455	-1.70147	5.6425	0.0266883	0.0960881	1	3	3	3	1	0	0	1
ENSG00000253686.2	LINC01484	2.2944	-1.7988	4.75852	0.0401477	0.130159	2	3	4	1	0	0	1	1
ENSG00000185155.12	MIXL1	2.29369	-1.70138	5.11129	0.034026	0.115315	1	4	2	3	0	1	1	0
ENSG00000261773.1	WI2-89031B12.1	2.28663	-1.61008	6.7984	0.016097	0.0652195	2	1	3	4	0	1	0	1
ENSG00000128250.5	RFPL1	2.23761	-1.49613	3.8466	0.062653	0.179932	0	18	4	0	0	5	0	0
ENSG00000039068.20	CDH1	2.22463	0.77997	13.7355	0.00123503	0.00843201	25	30	50	2	14	1	5	7
ENSG00000261490.1	RP11-448G15.3	2.21243	0.135761	31.7247	1.16536e-05	0.000211423	23	13	17	18	6	2	6	4
ENSG00000169181.13	GSG1L	2.20952	-1.63971	8.0779	0.00949307	0.0433117	4	2	2	9	2	1	1	0
ENSG00000280010.1	AP001350.4	2.19985	-1.34195	9.67401	0.00510935	0.0263805	3	2	5	7	0	1	2	1
ENSG00000276203.5	ANKRD20A3P	2.19279	-0.938374	8.01306	0.00974356	0.044149	7	8	1	16	4	0	1	3
ENSG00000229851.1	ARSD-AS1	2.1856	-1.39091	5.15945	0.0332749	0.113548	4	0	19	2	0	2	0	4
ENSG00000278338.4	VWA8-AS1	2.1839	-1.41715	8.10183	0.00940247	0.0429621	4	3	6	4	1	3	0	0
ENSG00000225486.1	RP11-301G21.1	2.17984	-1.73305	6.69015	0.0168569	0.0676531	1	5	5	2	1	1	1	0
ENSG00000236754.5	AC004019.13	2.16778	-2.01584	4.45001	0.0465338	0.145184	2	1	1	5	0	0	2	0
ENSG00000215246.5	RP11-43F13.3	2.16619	-1.9397	4.55847	0.0441663	0.139806	3	2	0	4	1	0	1	0
ENSG00000267723.1	CTD-2189E23.1	2.16604	-1.73351	4.85981	0.0382715	0.125807	2	1	1	5	0	0	2	0
ENSG00000286722.1	RP11-305M3.6	2.16402	-1.93989	4.62363	0.0428095	0.136555	4	1	3	1	0	0	2	0
ENSG00000227740.2	LINC02803	2.16165	-1.58075	5.37304	0.0301607	0.105643	5	1	6	1	0	3	0	0
ENSG00000277662.1	RP11-74J13.9	2.15579	-1.8331	4.61725	0.0429403	0.136889	0	2	6	1	1	0	1	0
ENSG00000287377.1	RP11-415F23.5	2.15029	-1.86768	4.3331	0.0492484	0.150924	0	3	2	4	1	0	0	1
ENSG00000267606.1	AC006116.21	2.14971	-1.97721	3.98094	0.0585764	0.171665	1	0	3	5	1	1	0	0
ENSG00000230021.10	RP11-206L10.17	2.14872	-1.29396	6.42959	0.018855	0.073638	4	11	0	5	3	1	1	0
ENSG00000230077.1	MTAPP2	2.14804	-2.05523	4.29076	0.0502754	0.153172	2	2	5	0	0	0	1	1
ENSG00000132429.10	POPDC3	2.1381	-1.90303	4.00967	0.0577442	0.169834	0	4	1	4	0	1	0	1
ENSG00000232973.13	CYP1B1-AS1	2.13752	-1.90278	4.00578	0.0578561	0.170127	1	1	2	5	0	2	0	0
ENSG00000218305.4	CDC14C	2.13665	-1.97725	3.17029	0.0888343	0.233006	0	1	6	2	0	0	0	2
ENSG00000016082.15	ISL1	2.13559	-1.3177	4.36866	0.0484043	0.149112	11	4	0	1	0	0	4	0
ENSG00000285444.1	RP11-147H23.3	2.13322	0.303284	6.46812	0.0185435	0.0727473	21	4	44	21	14	10	0	0
ENSG00000288258.1	GS1-273L24.6	2.10849	0.708287	14.9499	0.000837316	0.00613744	26	29	31	27	0	20	0	10
ENSG00000136842.14	TMOD1	2.10311	-1.60999	5.40243	0.0297584	0.104659	4	3	7	2	1	0	0	3
ENSG00000283415.2	RP11-413N10.3	2.0896	-2.18109	2.77339	0.110051	0.270632	1	0	0	4	0	0	1	0
ENSG00000234031.1	RPS3AP44	2.08956	-2.13795	2.94684	0.100124	0.253972	1	0	0	4	0	0	1	0
ENSG00000254042.2	SLIT3-AS2	2.08934	-2.18109	2.53185	0.125868	0.297198	4	0	0	1	0	0	1	0
ENSG00000264655.1	PPIAP54	2.08766	-2.22539	2.63496	0.118809	0.285478	4	1	0	0	0	0	1	0
ENSG00000215520.3	RPS4XP4	2.08764	-2.31857	2.94843	0.102259	0.257507	1	0	1	3	0	0	1	0
ENSG00000228648.1	RP11-568A7.2	2.08759	-2.27127	3.04439	0.095002	0.244641	1	0	1	3	0	0	1	0
ENSG00000250197.1	HMGN1P15	2.0875	-2.27127	3.14477	0.090046	0.235537	2	0	1	2	0	0	1	0
ENSG00000253973.3	RP11-467K18.2	2.08739	-2.13779	2.76156	0.110769	0.271938	2	0	1	2	0	0	1	0
ENSG00000121594.12	CD80	2.08606	-2.13788	3.17261	0.0887251	0.232786	2	2	0	1	0	0	1	0
ENSG00000237415.2	NRBF2P3	2.08594	-1.93994	3.46162	0.0762575	0.208151	2	2	0	1	0	0	1	0
ENSG00000225133.1	MORF4L1P4	2.08583	-2.22554	3.18114	0.0883248	0.232065	1	1	1	2	0	0	1	0
ENSG00000272902.2	TBC1D8-AS1	2.08577	-2.13811	3.23755	0.0857303	0.227136	1	1	1	2	0	0	1	0
ENSG00000169594.14	BNC1	2.08545	-2.05553	3.53168	0.0735474	0.202704	2	0	1	2	1	0	0	0
ENSG00000235349.1	RP11-561N12.6	2.08443	-2.27131	2.75849	0.110957	0.272157	2	3	0	0	0	0	1	0
ENSG00000254718.6	CTD-2184C24.2	2.08434	-2.13805	2.81098	0.107806	0.266531	0	2	0	3	1	0	0	0
ENSG00000260761.1	RP11-184E9.2	2.08431	-2.2254	3.13605	0.0904645	0.236386	1	2	0	2	1	0	0	0
ENSG00000235385.2	LINC02154	2.08413	-0.0421207	17.0959	0.000435788	0.00363616	5	20	12	11	2	6	3	2
ENSG00000259335.1	HNRNPMP1	2.08406	-2.13808	3.11836	0.0913204	0.237971	1	2	1	1	0	0	1	0
ENSG00000172938.3	MRGPRD	2.0839	-2.31857	3.46807	0.0781418	0.211886	2	1	1	1	1	0	0	0
ENSG00000242255.1	RPL39P34	2.08382	-2.22555	3.17921	0.0884155	0.232238	0	1	2	2	0	0	1	0
ENSG00000287180.1	RP11-65F13.4	2.0837	-2.31862	3.06271	0.0962805	0.247037	2	1	2	0	0	0	1	0
ENSG00000250584.3	LINC01511	2.08368	-2.13804	3.60958	0.070663	0.196554	1	1	2	1	0	0	1	0
ENSG00000203805.11	PLPP4	2.08367	-2.27132	3.1481	0.0898871	0.235188	2	1	2	0	0	0	1	0
ENSG00000233131.1	RPS15AP14	2.08356	-2.05569	2.93484	0.100777	0.255004	2	1	2	0	0	0	1	0
ENSG00000277235.1	RP4-550H1.7	2.08344	-2.18111	2.98516	0.0980747	0.250387	2	0	2	1	1	0	0	0
ENSG00000177025.3	C19orf18	2.08289	-0.994902	11.6518	0.00249546	0.0148255	10	7	6	7	0	4	3	1
ENSG00000230013.2	CT70	2.08275	-2.18118	2.77626	0.109878	0.270358	1	4	0	0	0	0	1	0
ENSG00000273443.1	RP11-54O7.18	2.08237	-2.18116	2.90387	0.102482	0.257859	1	3	1	0	0	0	1	0
ENSG00000275927.1	RP11-567P19.1	2.08235	-2.13815	2.82939	0.106725	0.26447	1	3	1	0	0	0	1	0
ENSG00000182585.10	EPGN	2.08226	-2.13803	2.80016	0.108446	0.267826	0	2	1	2	1	0	0	0
ENSG00000260971.4	RP1-158P9.2	2.08212	-2.27134	3.14946	0.0898218	0.235049	0	2	2	1	0	0	1	0
ENSG00000261051.1	RP11-274H2.5	2.08183	-2.22552	3.16374	0.0891434	0.233662	1	1	2	1	1	0	0	0
ENSG00000275803.1	RN7SL736P	2.08127	-2.27136	2.64208	0.118338	0.28459	1	0	4	0	0	0	1	0
ENSG00000171236.10	LRG1	2.08059	-2.27131	3.03707	0.0953754	0.245306	0	3	1	1	1	0	0	0
ENSG00000019991.18	HGF	2.08056	-2.18109	2.88055	0.103789	0.259986	0	3	1	1	1	0	0	0
ENSG00000277013.1	CTC-526N19.1	2.08032	-1.97759	3.0405	0.0952	0.245082	0	3	2	0	0	0	1	0
ENSG00000260570.1	RP11-24N18.1	2.07991	0.800301	8.22062	0.00896648	0.0414488	56	54	44	29	0	49	0	0
ENSG00000232934.8	RP11-324O2.3	2.07848	-2.22555	2.76939	0.110293	0.271025	0	3	2	0	1	0	0	0
ENSG00000185186.10	LINC00313	2.07847	-2.13815	2.81854	0.10736	0.265642	0	3	2	0	1	0	0	0
ENSG00000269873.1	CTD-2587H19.3	2.0781	-2.22557	2.77244	0.110109	0.270676	0	2	3	0	1	0	0	0
ENSG00000124343.14	XG	2.0781	-2.22554	2.5263	0.126261	0.297899	0	2	3	0	1	0	0	0
ENSG00000186377.8	CYP4X1	2.07748	-1.52439	7.93899	0.0100387	0.0452347	5	5	5	4	2	1	2	0
ENSG00000258150.6	RP11-345J4.3	2.07728	-2.22531	2.27357	0.145854	0.329227	5	0	0	0	0	0	0	1
ENSG00000212232.1	SNORD17	2.07694	-1.67022	5.63199	0.0268151	0.0964385	3	4	1	4	1	0	1	1
ENSG00000155962.13	CLIC2	2.07584	-2.1379	3.14938	0.0898256	0.235049	2	1	0	2	0	0	0	1
ENSG00000231804.1	RP11-317B17.3	2.07541	-2.31842	2.97995	0.100567	0.254543	2	0	1	2	0	0	0	1
ENSG00000275005.1	RP11-234G16.5	2.07438	-2.13755	2.29824	0.143789	0.326054	1	0	0	4	0	1	0	0
ENSG00000259649.4	RP11-351M8.1	2.07372	-2.22535	3.46669	0.0760578	0.207802	2	1	1	1	0	0	0	1
ENSG00000286438.1	RP11-314E23.2	2.07271	-2.22532	2.37556	0.137539	0.315867	0	1	0	4	0	1	0	0
ENSG00000188959.10	C9orf152	2.07265	-2.18093	2.82367	0.10706	0.265041	1	1	0	3	0	1	0	0
ENSG00000228665.2	RP11-20O24.1	2.07246	-2.2253	2.97707	0.0985032	0.251179	1	3	0	1	0	0	0	1
ENSG00000275191.1	RP11-36I17.2	2.07222	-2.13788	3.13192	0.0906633	0.236615	0	2	1	2	0	0	0	1
ENSG00000235945.1	AC002543.2	2.07218	-2.31838	2.85408	0.107526	0.266028	1	0	1	3	0	1	0	0
ENSG00000225096.3	XXbac-BPG55C20.7	2.07211	-2.18103	3.26878	0.0843318	0.224385	1	2	1	1	0	0	0	1
ENSG00000154736.6	ADAMTS5	2.07194	-1.15814	10.7695	0.00341349	0.0190491	6	3	4	6	2	1	1	1
ENSG00000187823.3	RTL4	2.0709	-2.22524	3.05178	0.0946262	0.244155	1	2	0	2	0	1	0	0
ENSG00000267197.1	CTC-429L19.3	2.0699	-1.9032	2.58428	0.122218	0.291264	0	1	3	1	0	0	0	1
ENSG00000279852.1	RP11-91J19.2	2.06966	-2.27121	2.98342	0.0981666	0.250552	0	1	3	1	0	0	0	1
ENSG00000261175.6	LINC02188	2.06905	-2.27114	2.68504	0.115549	0.279924	2	3	0	0	0	1	0	0
ENSG00000254765.1	RP11-1H15.1	2.06855	-2.18097	2.57049	0.123166	0.293	0	1	2	2	0	1	0	0
ENSG00000232937.1	RP11-98D18.2	2.06843	-2.13797	2.17393	0.154564	0.341645	0	3	2	0	0	0	0	1
ENSG00000174130.12	TLR6	2.06773	-1.76569	5.10806	0.0340771	0.115446	2	6	3	1	2	1	0	0
ENSG00000287757.1	RP11-876B24.1	2.06734	-2.09608	1.98262	0.173119	0.369215	0	0	5	0	0	0	0	1
ENSG00000111816.8	FRK	2.06717	-2.13793	3.03102	0.0956854	0.245874	1	3	1	0	0	1	0	0
ENSG00000229618.3	AC011288.2	2.0667	-2.22518	2.73581	0.112351	0.274555	1	2	2	0	0	1	0	0
ENSG00000272834.1	RP5-1042K10.13	2.06659	-2.31845	2.96417	0.10141	0.256184	1	2	2	0	0	1	0	0
ENSG00000182791.5	CCDC87	2.06593	-1.63974	5.6945	0.0260712	0.0944055	4	1	4	3	0	1	1	1
ENSG00000159216.19	RUNX1	2.06508	-1.61028	6.05637	0.0221929	0.083423	3	4	4	1	0	0	1	2
ENSG00000268565.1	AC005339.2	2.06364	-1.39101	2.53996	0.125295	0.29627	0	3	0	9	0	0	0	3
ENSG00000273257.2	RP11-177J6.1	2.05797	-0.798214	6.30807	0.019876	0.0766603	5	16	2	3	1	0	1	5
ENSG00000276089.1	ENSG10010135214.1	2.04266	-1.61043	4.55319	0.0442783	0.140081	4	8	0	3	0	0	4	0
ENSG00000270103.3	RNU11	2.03413	-1.49663	5.9773	0.0229819	0.0857254	2	3	1	9	1	1	2	0
ENSG00000260534.1	RP11-1006G14.4	2.03317	0.340772	14.5294	0.000956373	0.00683988	40	17	12	20	3	5	18	0
ENSG00000120949.15	TNFRSF8	2.02626	-1.63994	6.37338	0.0193198	0.0749956	4	5	2	4	0	0	2	2
ENSG00000281383.1	CH507-513H4.5	2.01562	-1.11624	5.03071	0.0353257	0.118545	3	12	4	9	4	0	4	0
ENSG00000241570.8	PAQR9-AS1	2.01271	-1.44327	7.10276	0.0141571	0.0590536	5	2	4	4	1	2	0	1
ENSG00000223653.6	RP11-131L23.1	2.0107	-1.03443	14.2426	0.00104816	0.00737254	5	6	7	7	3	2	1	1
ENSG00000238009.6	RP11-34P13.7	2.00912	-1.94004	2.39624	0.135924	0.313144	1	0	0	7	0	0	2	0
ENSG00000238273.3	AC012360.6	2.00726	-1.97733	3.50453	0.0745845	0.204889	3	0	0	5	1	0	1	0
ENSG00000261279.5	ULK4P1	2.00566	0.128869	9.70255	0.00505487	0.0261578	24	32	27	4	5	6	0	14
ENSG00000131233.10	GJA9	2.00358	-1.67066	2.4195	0.134133	0.310283	0	0	0	8	2	0	0	0
ENSG00000268520.1	CTD-2616J11.10	2.00315	-2.05548	3.15638	0.0894926	0.234377	2	4	0	2	0	0	2	0
ENSG00000278972.1	CTD-3022L24.1	2.00223	-1.8679	3.4124	0.0782302	0.21205	1	1	1	5	2	0	0	0
ENSG00000286035.1	RP11-429O22.1	2.00102	-2.01601	3.79224	0.0643941	0.183827	1	3	2	2	0	0	2	0
ENSG00000254936.4	AF131215.3	1.99974	-1.97756	2.89376	0.103046	0.258747	3	5	0	0	1	0	1	0
ENSG00000254589.1	EIF4A2P3	1.99962	-2.05553	3.81511	0.063655	0.182205	1	4	1	2	1	0	1	0
ENSG00000241307.1	RP11-674E16.1	1.99797	-1.94012	3.18795	0.0880068	0.231564	2	5	1	0	1	0	1	0
ENSG00000234022.1	AC008278.2	1.99351	-2.05524	3.58943	0.0713967	0.198098	1	3	0	4	0	0	1	1
ENSG00000249489.1	GAPDHP70	1.99276	-2.01565	4.05731	0.056394	0.166795	2	1	2	3	0	0	1	1
ENSG00000279103.1	CTC-204F22.1	1.99199	-2.01573	3.75438	0.0656394	0.186363	1	4	0	3	0	0	1	1
ENSG00000266258.1	LINC01909	1.98625	-2.05535	3.77525	0.0649494	0.184935	3	2	3	0	0	1	1	0
ENSG00000184357.5	H1-5	1.98514	-1.90281	2.93983	0.100505	0.254502	3	1	0	4	0	0	0	2
ENSG00000203435.2	E2F3P2	1.98274	-1.97738	3.40214	0.078649	0.212782	2	2	4	0	1	1	0	0
ENSG00000189419.8	SPATA41	1.97976	-1.86741	4.10305	0.0551313	0.164243	2	1	3	2	0	0	0	2
ENSG00000255847.5	RP11-167N4.2	1.97904	-2.05522	2.61065	0.12043	0.288213	3	5	0	0	0	0	0	2
ENSG00000254510.2	RP11-867G23.10	1.97853	-1.7655	3.767	0.0652212	0.185461	3	4	0	1	0	1	0	1
ENSG00000267633.1	CTB-5E10.3	1.97792	-1.29359	4.51285	0.0451451	0.141931	1	11	3	3	2	3	0	0
ENSG00000279796.1	RP11-317F20.3	1.97656	-2.09579	4.07344	0.0559449	0.16581	1	1	3	3	0	1	0	1
ENSG00000239494.2	RN7SL333P	1.97505	-2.09583	4.23324	0.0517097	0.156491	1	2	3	2	0	1	0	1
ENSG00000235661.3	MIR670HG	1.97479	-1.34187	4.77032	0.0399239	0.129711	0	12	1	5	1	2	0	2
ENSG00000207445.1	SNORD15B	1.97037	-1.86751	3.34135	0.0811828	0.217933	1	2	4	1	0	2	0	0
ENSG00000262470.2	TVP23CP2	1.96922	-1.83292	3.49112	0.0751026	0.206026	1	0	4	6	0	0	3	0
ENSG00000225450.1	RP3-508I15.14	1.96369	-1.83303	5.19695	0.0327029	0.112066	3	4	2	2	2	0	1	0
ENSG00000155749.13	FLACC1	1.96322	-1.86783	5.22486	0.0322844	0.110989	2	2	5	2	1	0	2	0
ENSG00000115297.11	TLX2	1.96058	-1.86747	4.52596	0.0448613	0.141263	6	2	0	3	1	0	1	1
ENSG00000250516.1	RP11-380I10.2	1.95586	-1.79892	4.8722	0.0380488	0.125217	5	2	2	2	0	1	2	0
ENSG00000228283.3	KATNBL1P6	1.95454	-0.429277	19.3342	0.000229709	0.00215649	6	10	10	11	2	3	4	2
ENSG00000238186.1	RP11-656D10.6	1.95007	-1.70166	4.5486	0.0443759	0.140293	4	4	2	1	2	1	0	0
ENSG00000286572.1	RP11-74C13.6	1.94483	-1.93955	3.69697	0.0675806	0.190286	5	1	5	0	0	0	1	2
ENSG00000249908.2	BRD9P2	1.94262	-1.79862	6.24518	0.0204285	0.0783436	3	2	4	2	0	1	1	1
ENSG00000161609.10	KASH5	1.94092	-1.6703	5.0799	0.0345258	0.116578	5	3	2	1	1	2	0	0
ENSG00000260176.1	CTD-3126B10.4	1.9368	-1.76552	2.45465	0.131479	0.306372	0	4	0	7	0	1	0	2
ENSG00000261288.1	RP11-20I23.11	1.9368	-1.76552	2.45465	0.131479	0.306372	0	4	0	7	0	1	0	2
ENSG00000275160.1	RP11-187C18.3	1.93113	-1.58116	6.09825	0.0217873	0.0822671	1	5	6	2	1	0	2	1
ENSG00000265257.5	RP11-21J18.1	1.92915	-1.1375	2.90434	0.102456	0.257841	6	11	0	0	0	0	5	0
ENSG00000225437.6	PACRG-AS2	1.92523	0.836656	32.8938	9.14046e-06	0.000176961	30	25	20	32	3	13	9	8
ENSG00000236409.2	NRADDP	1.92491	-1.55243	6.53989	0.0179786	0.0710241	4	4	4	2	2	0	0	2
ENSG00000272554.1	RP11-317L10.1	1.92472	-1.67006	4.54578	0.0444361	0.140386	0	7	1	6	1	1	1	1
ENSG00000227028.6	SLC8A1-AS1	1.92354	-1.15894	5.56712	0.0276124	0.0987018	1	7	5	4	4	0	1	0
ENSG00000278905.1	RP11-65F13.3	1.91375	-0.0731176	15.787	0.000645867	0.00495873	8	14	21	9	2	7	6	1
ENSG00000171595.14	DNAI2	1.90769	-1.22475	5.97411	0.0230144	0.0857656	4	6	10	0	2	1	3	0
ENSG00000182732.18	RGS6	1.90741	-0.699718	7.23546	0.0133938	0.0565427	9	3	11	7	1	6	0	2
ENSG00000265205.1	AC010761.13	1.90707	-1.41709	8.134	0.00928213	0.0425105	7	2	4	4	1	2	1	1
ENSG00000184378.3	ACTRT3	1.89745	-1.29357	7.26228	0.0132451	0.0560794	5	2	6	4	1	2	0	2
ENSG00000235072.2	ARNILA	1.89496	-1.22414	6.77555	0.0162542	0.065715	7	2	5	9	0	1	3	3
ENSG00000279838.1	RP4-635A23.6	1.88046	0.0896145	17.3642	0.000402748	0.00342184	15	11	14	16	4	0	10	4
ENSG00000276612.3	CH507-9B2.4	1.87762	-0.509022	2.76756	0.110404	0.271259	16	0	26	0	0	0	0	13
ENSG00000235532.1	LINC00402	1.84916	-1.79888	3.66228	0.0687852	0.192745	7	0	1	5	2	0	2	0
ENSG00000269976.1	RP11-130L8.2	1.84075	-1.49693	6.16714	0.0211381	0.0804409	7	4	1	4	3	0	1	1
ENSG00000261654.1	RP11-96K19.4	1.83829	-0.747793	12.366	0.00195002	0.0121345	10	8	5	11	1	3	5	2
ENSG00000240135.1	PSMD12P1	1.83739	-0.7007	10.686	0.00351806	0.0195107	4	13	5	9	1	2	5	2
ENSG00000274760.1	ENSG10010138057.1	1.83513	-0.831561	10.1692	0.00424904	0.0226831	11	7	8	5	2	4	4	0
ENSG00000212443.1	SNORA53	1.83458	-1.70185	3.95508	0.0593371	0.173355	1	4	6	2	3	0	1	0
ENSG00000256566.1	RP4-734P14.4	1.83333	0.172175	7.49267	0.012041	0.0521356	20	11	31	25	7	0	11	11
ENSG00000179766.19	ATP8B5P	1.83313	-1.76597	4.6019	0.0432566	0.137583	1	3	2	4	1	0	2	0
ENSG00000184984.10	CHRM5	1.83285	-1.63972	5.75709	0.0253493	0.092293	5	2	4	5	2	0	1	2
ENSG00000132554.20	RGS22	1.83092	-1.31786	5.96592	0.023098	0.0860308	5	1	4	3	1	1	2	0
ENSG00000148584.15	A1CF	1.83081	-1.73334	3.43311	0.0773934	0.210289	4	2	2	2	3	0	0	0
ENSG00000239801.1	DENND6A-AS1	1.82954	-1.67073	4.5075	0.0452615	0.142232	2	5	2	1	1	0	2	0
ENSG00000258130.8	RP11-347C12.3	1.82805	-1.70147	3.29065	0.0833681	0.222591	5	0	2	3	0	0	2	1
ENSG00000287085.1	RP11-173H9.2	1.82782	-1.93969	3.77351	0.0650067	0.185045	3	0	2	5	1	0	1	1
ENSG00000287558.1	RP1-81D8.7	1.82696	-1.79918	2.93323	0.100864	0.255179	0	2	5	3	3	0	0	0
ENSG00000169715.15	MT1E	1.82642	-1.86772	2.15692	0.156113	0.343806	6	0	0	1	0	0	2	0
ENSG00000281903.2	LINC02246	1.82622	-1.46979	5.13657	0.0336294	0.114345	6	4	1	5	2	0	0	3
ENSG00000286970.1	CTD-2335I23.3	1.8251	-2.01608	2.33685	0.140626	0.320986	5	1	0	1	0	0	2	0
ENSG00000240563.2	L1TD1	1.8245	-1.83305	3.23032	0.0860578	0.227771	5	1	4	0	0	0	2	1
ENSG00000267943.1	CTD-2620I22.3	1.82412	-1.63969	3.96643	0.0590017	0.172707	4	1	5	3	1	0	1	2
ENSG00000231344.1	RP3-426I6.2	1.82305	-2.05559	2.69366	0.114999	0.279282	3	0	2	2	0	0	2	0
ENSG00000173702.7	MUC13	1.82163	-2.13799	3.2877	0.0834973	0.222764	4	1	1	1	1	0	1	0
ENSG00000143217.9	NECTIN4	1.82094	-1.61056	4.05966	0.0563284	0.166681	4	2	3	1	2	0	0	1
ENSG00000238180.1	RPL21P34	1.82032	-2.05546	2.71245	0.11381	0.277312	4	3	0	0	1	0	1	0
ENSG00000254109.6	RBPMS-AS1	1.81984	-1.73382	2.49331	0.128633	0.301771	1	0	3	3	0	0	2	0
ENSG00000253598.3	SLC10A5	1.81821	-1.47005	4.33162	0.0492839	0.150982	0	7	3	3	1	1	1	1
ENSG00000260388.2	LINC00562	1.81796	-1.73315	3.74802	0.0658514	0.186869	2	5	1	2	2	1	0	0
ENSG00000260803.1	Z84812.4	1.81795	-2.13794	3.43642	0.0772605	0.210135	2	1	3	1	1	0	1	0
ENSG00000187944.5	C2orf66	1.81722	-1.41711	6.69194	0.016844	0.0676267	4	4	5	3	2	2	0	1
ENSG00000206448.3	PPIAP30	1.81678	-2.138	2.71333	0.113754	0.277201	3	3	1	0	2	0	0	0
ENSG00000116096.6	SPR	1.81489	-2.05541	2.63216	0.118994	0.285795	2	3	2	0	2	0	0	0
ENSG00000244061.1	RP11-389C8.1	1.81453	-2.13798	2.92547	0.101289	0.255997	1	2	4	0	1	0	1	0
ENSG00000254872.3	LINC02688	1.81449	-1.24725	4.73199	0.040656	0.131506	5	2	8	4	0	1	1	4
ENSG00000285025.1	RP5-1104E15.10	1.81275	-1.86783	1.76789	0.197295	0.401302	0	0	0	7	0	1	1	0
ENSG00000227195.11	MIR663AHG	1.81249	-1.97743	2.96769	0.0990031	0.252152	3	2	0	2	0	0	1	1
ENSG00000215771.2	LRRC37A14P	1.81212	-1.97744	2.6724	0.116361	0.281228	5	1	0	1	1	0	0	1
ENSG00000165376.12	CLDN2	1.81204	-1.73321	3.66666	0.0686317	0.192483	0	3	4	3	0	0	1	2
ENSG00000170608.3	FOXA3	1.81193	-1.76541	5.17796	0.0329912	0.112788	3	2	2	3	1	1	0	1
ENSG00000254463.1	PPIAP41	1.81033	-2.05549	2.90345	0.102506	0.257872	2	1	2	2	0	0	1	1
ENSG00000266965.1	RP11-712P20.2	1.81032	-1.94005	3.44155	0.0770551	0.209803	2	1	2	2	0	0	1	1
ENSG00000255970.1	LINC02421	1.80957	-1.97738	2.55777	0.124048	0.294332	1	2	0	4	0	1	1	0
ENSG00000255176.1	AP002954.3	1.80931	-1.73344	3.32125	0.0820413	0.219727	2	4	0	1	0	0	1	1
ENSG00000285887.1	RP1-137D17.3	1.80908	-1.97717	2.45396	0.131531	0.306429	4	3	0	0	1	0	0	1
ENSG00000105971.15	CAV2	1.80814	-0.4692	11.6379	0.00250756	0.0148722	10	12	11	6	5	0	4	4
ENSG00000287906.1	RP13-726E6.5	1.80647	-1.97721	2.45316	0.131591	0.306461	0	0	4	3	1	0	0	1
ENSG00000279070.2	RP11-287D1.2	1.80578	-1.93995	3.21232	0.0868797	0.229226	2	4	1	0	1	0	0	1
ENSG00000248472.8	DDX11L9	1.80515	-1.61041	3.32627	0.0818256	0.219319	0	5	3	2	1	2	0	0
ENSG00000279607.1	RP11-348J12.5	1.80136	-1.97741	2.34118	0.140278	0.320322	0	0	6	1	0	1	1	0
ENSG00000272004.1	RP11-345P4.10	1.79978	-1.49631	3.54191	0.0731611	0.202001	0	5	7	7	0	3	0	3
ENSG00000258806.2	OR11H7	1.79721	-2.05534	2.82925	0.106734	0.26447	1	1	3	2	0	0	0	2
ENSG00000246422.2	DIAPH1-AS1	1.79683	-2.27135	1.7147	0.203916	0.410486	0	0	0	4	0	0	1	0
ENSG00000257883.1	RP11-497G19.1	1.79507	-2.31866	1.94477	0.177105	0.374629	0	1	0	3	0	0	1	0
ENSG00000225572.1	DOCK4-AS1	1.79493	-2.27137	2.0162	0.169675	0.36434	1	1	0	2	0	0	1	0
ENSG00000248880.1	ICE2P1	1.79478	-2.22556	2.04359	0.166926	0.360171	1	0	0	3	1	0	0	0
ENSG00000261842.1	RP11-143I21.1	1.79478	-2.31862	1.99571	0.171766	0.367492	2	0	0	2	1	0	0	0
ENSG00000213886.4	UBD	1.79473	-2.27137	1.83422	0.189407	0.390915	2	0	0	2	1	0	0	0
ENSG00000235438.7	ESRRAP2	1.79471	-2.13805	2.15314	0.15646	0.344297	1	0	0	3	1	0	0	0
ENSG00000257647.1	RP11-701H24.3	1.79468	-1.93985	1.51215	0.231827	0.447608	0	0	0	4	1	0	0	0
ENSG00000225180.8	PVALEF	1.79464	-2.27132	1.77893	0.195954	0.399632	3	0	0	1	1	0	0	0
ENSG00000259869.2	AL022344.7	1.79462	-2.27138	1.95834	0.175663	0.372804	0	0	1	3	0	0	1	0
ENSG00000253539.1	RP11-402L5.1	1.79458	-2.22558	1.86055	0.186384	0.386955	0	0	1	3	0	0	1	0
ENSG00000141052.18	MYOCD	1.79448	-2.31867	2.22241	0.15025	0.335492	2	0	1	1	0	0	1	0
ENSG00000228016.1	RAPGEF4-AS1	1.7944	-2.22554	2.1033	0.16112	0.351589	2	0	1	1	0	0	1	0
ENSG00000286460.1	AC006538.9	1.79431	-2.2256	1.86188	0.186233	0.386728	3	0	1	0	0	0	1	0
ENSG00000275468.1	LLNLR-304A6.2	1.79431	-2.22554	1.85284	0.187263	0.388168	3	0	1	0	0	0	1	0
ENSG00000251660.1	AC007036.5	1.79407	-0.494363	7.58953	0.0115715	0.0505853	2	4	13	23	2	4	3	5
ENSG00000287030.1	RP11-613M5.5	1.79302	-2.27135	2.23124	0.149481	0.334414	1	1	0	2	1	0	0	0
ENSG00000236965.4	OR52N3P	1.79296	-2.31856	2.19401	0.152759	0.338847	2	1	0	1	1	0	0	0
ENSG00000235795.1	RP11-421L21.2	1.79286	-2.18119	1.98236	0.173146	0.369246	2	1	0	1	1	0	0	0
ENSG00000197616.13	MYH6	1.7928	-2.36759	2.47197	0.132438	0.307879	1	1	1	1	0	0	1	0
ENSG00000216990.2	HSPD1P10	1.79273	-2.2714	2.51913	0.126773	0.298851	1	1	1	1	0	0	1	0
ENSG00000279739.1	CTB-105N12.2	1.79254	-2.13815	2.24085	0.148648	0.333332	1	0	1	2	1	0	0	0
ENSG00000279589.1	RP11-454F8.4	1.79244	-2.2714	1.78475	0.195253	0.398699	3	0	1	0	1	0	0	0
ENSG00000183396.4	TMEM89	1.79241	-2.22551	1.84624	0.188019	0.389034	3	0	1	0	1	0	0	0
ENSG00000222035.4	KIAA2012-AS1	1.79218	-2.0157	1.66659	0.210146	0.41967	1	0	2	1	0	0	1	0
ENSG00000224282.3	CTD-2290C23.1	1.79144	-2.31871	1.94507	0.177073	0.37459	0	3	0	1	0	0	1	0
ENSG00000272386.1	RP11-666A8.12	1.79144	-2.31871	1.94507	0.177073	0.37459	0	3	0	1	0	0	1	0
ENSG00000269037.1	LINC01838	1.79127	-2.36757	2.15706	0.158318	0.347309	1	2	0	1	1	0	0	0
ENSG00000137960.6	GIPC2	1.79124	-1.83282	2.97336	0.0987007	0.251535	1	1	3	2	0	2	0	0
ENSG00000174225.15	ARL13A	1.79115	-2.31858	1.98027	0.173363	0.369595	2	2	0	0	1	0	0	0
ENSG00000198300.14	PEG3	1.79111	-2.09587	2.43695	0.132808	0.308519	3	2	2	0	0	2	0	0
ENSG00000266401.2	RP11-874J12.4	1.7911	-2.22542	1.88303	0.183851	0.383796	2	2	0	0	1	0	0	0
ENSG00000241185.2	RPL21P122	1.79087	-2.36757	2.46076	0.133267	0.309028	1	1	1	1	1	0	0	0
ENSG00000073861.3	TBX21	1.79084	-2.31867	2.48608	0.12916	0.302597	1	1	1	1	1	0	0	0
ENSG00000168509.20	HJV	1.79079	-2.22563	2.35991	0.138778	0.317973	1	1	1	1	1	0	0	0
ENSG00000279306.1	RP5-915N17.11	1.79075	-2.13817	2.16861	0.155046	0.342324	1	1	1	1	1	0	0	0
ENSG00000281039.1	RP4-777O23.3	1.79064	0.1564	6.80744	0.0160353	0.0650266	23	27	23	14	0	22	7	0
ENSG00000233503.1	HNRNPLP1	1.79062	-2.27143	2.24195	0.148552	0.333225	0	1	2	1	0	0	1	0
ENSG00000228089.1	PNKDP1	1.79058	-2.36762	2.16801	0.15732	0.345696	1	1	2	0	0	0	1	0
ENSG00000248930.1	CHP1P1	1.79044	-2.31859	2.19493	0.152677	0.338746	1	0	2	1	1	0	0	0
ENSG00000261535.1	CTA-305I2.1	1.79013	-2.27147	1.79078	0.194528	0.397807	1	0	3	0	0	0	1	0
ENSG00000100181.22	TPTEP1	1.78952	-2.31868	1.93792	0.177838	0.375858	0	3	0	1	1	0	0	0
ENSG00000271612.1	HSPE1P14	1.78905	-2.36759	2.15861	0.158177	0.347191	1	2	1	0	1	0	0	0
ENSG00000271071.1	RP11-457M11.6	1.78901	-2.27142	2.23772	0.148918	0.333721	1	2	1	0	1	0	0	0
ENSG00000270095.1	RP11-214K3.18	1.78872	-2.31869	2.21524	0.150879	0.336258	0	1	2	1	1	0	0	0
ENSG00000271079.1	CTAGE15	1.78872	-2.31861	2.1956	0.152618	0.33872	0	1	2	1	1	0	0	0
ENSG00000287094.1	RP3-388E23.3	1.78869	-2.22561	2.1063	0.160835	0.351243	0	1	2	1	1	0	0	0
ENSG00000211452.11	DIO1	1.78839	-2.18114	1.79144	0.194449	0.397763	0	1	3	0	0	0	1	0
ENSG00000104537.17	ANXA13	1.78817	-2.05568	2.10756	0.160715	0.351064	1	0	3	0	1	0	0	0
ENSG00000231468.2	PRDX3P2	1.78745	-2.13762	2.51431	0.127117	0.299331	0	2	4	1	0	2	0	0
ENSG00000255326.1	CTD-2530H12.4	1.78733	-0.639014	9.81456	0.00484714	0.0252765	10	12	4	4	3	4	3	0
ENSG00000226676.1	LINC02679	1.78731	-2.31872	1.9397	0.177647	0.375518	0	3	1	0	1	0	0	0
ENSG00000260602.2	HMGN2P40	1.78691	-2.27146	1.83407	0.189424	0.390921	0	2	2	0	1	0	0	0
ENSG00000242748.1	RPL23AP81	1.78483	-0.700157	10.0736	0.00440187	0.0233593	6	4	13	10	1	5	4	1
ENSG00000239039.1	SNORD13	1.78465	-2.27112	1.89797	0.182189	0.381708	1	0	0	3	0	0	0	1
ENSG00000238741.1	SCARNA7	1.78464	-2.3185	1.90036	0.181925	0.381387	1	0	0	3	0	0	0	1
ENSG00000285871.1	RP11-314J18.11	1.78458	-2.18095	1.98663	0.172703	0.368866	2	0	0	2	0	0	0	1
ENSG00000256040.2	PAPPA-AS1	1.78402	0.333472	18.4829	0.000291718	0.0026145	13	15	18	28	4	9	3	9
ENSG00000286964.1	RP4-809E13.5	1.78383	1.0938	40.2247	2.23083e-06	6.07094e-05	36	38	32	22	12	14	13	5
ENSG00000288156.1	AC104530.1	1.78288	-2.18107	2.22393	0.150118	0.335378	1	1	0	2	0	0	0	1
ENSG00000261723.1	CTD-2196E14.3	1.78285	-2.27122	1.9679	0.174656	0.371664	1	1	0	2	0	0	0	1
ENSG00000249505.1	RP11-434H6.2	1.78256	-2.22526	1.79378	0.194169	0.397395	0	0	1	3	0	0	0	1
ENSG00000257894.2	RP1-78O14.1	1.78245	-2.27125	2.18805	0.153292	0.339555	1	0	1	2	0	0	0	1
ENSG00000258466.5	RP11-1012A1.4	1.78239	-2.181	2.20924	0.151408	0.337021	2	0	1	1	0	0	0	1
ENSG00000287972.1	RP11-747H12.9	1.78236	-2.27122	1.96795	0.17465	0.371664	2	0	1	1	0	0	0	1
ENSG00000108342.13	CSF3	1.78232	-2.36742	2.10665	0.163012	0.354127	2	0	1	1	0	0	0	1
ENSG00000240877.3	RN7SL521P	1.78225	-2.31853	1.90046	0.181914	0.381387	3	0	1	0	0	0	0	1
ENSG00000264546.1	RP11-464D20.6	1.78147	-2.22539	1.73414	0.201465	0.40686	0	0	0	4	0	1	0	0
ENSG00000237372.4	UNQ6494	1.78119	-2.22542	1.81179	0.19203	0.394446	3	0	0	1	0	1	0	0
ENSG00000223675.1	RP11-86H7.6	1.78114	-2.27116	1.95479	0.176039	0.373373	0	2	0	2	0	0	0	1
ENSG00000224223.1	VSTM2A-OT1	1.78111	-2.13796	2.10876	0.160601	0.350871	1	2	0	1	0	0	0	1
ENSG00000234997.2	AC016745.3	1.78065	-2.27129	2.1914	0.152993	0.339066	1	1	1	1	0	0	0	1
ENSG00000253649.5	PRSS51	1.7806	-2.18112	2.22927	0.149651	0.334687	2	1	1	0	0	0	0	1
ENSG00000278505.5	C17orf78	1.78055	-2.27129	1.9756	0.17385	0.370388	2	1	1	0	0	0	0	1
ENSG00000136869.16	TLR4	1.78041	-2.13785	1.94823	0.176736	0.374192	0	0	2	2	0	0	0	1
ENSG00000182366.11	FAM87A	1.7803	-1.97736	1.84245	0.188455	0.389415	2	0	2	0	0	0	0	1
ENSG00000198523.6	PLN	1.77972	-2.13787	1.89094	0.182968	0.382646	0	1	0	3	0	1	0	0
ENSG00000235974.1	VN2R19P	1.77963	-2.13797	2.17682	0.154303	0.34115	1	1	0	2	0	1	0	0
ENSG00000259449.1	NIFKP8	1.77942	-2.31839	2.13163	0.158451	0.347517	2	1	0	1	0	1	0	0
ENSG00000286749.1	RP11-141F7.1	1.7793	-2.31856	1.89907	0.182068	0.381513	0	3	0	1	0	0	0	1
ENSG00000225193.5	RPS12P26	1.77924	-2.1378	2.40059	0.135586	0.312653	1	0	1	2	0	1	0	0
ENSG00000266908.2	RP5-1022P6.7	1.77906	-2.27119	2.16756	0.155142	0.342338	2	0	1	1	0	1	0	0
ENSG00000223774.5	RP11-307B6.3	1.77881	-2.31857	2.16955	0.154961	0.34225	1	2	1	0	0	0	0	1
ENSG00000169877.10	AHSP	1.77841	-2.31858	2.16968	0.154949	0.34225	1	1	2	0	0	0	0	1
ENSG00000264083.1	RP11-227G15.9	1.77837	-2.36747	2.10916	0.162775	0.353694	1	1	2	0	0	0	0	1
ENSG00000248719.2	RP11-377G16.2	1.77734	-2.27123	2.43515	0.132944	0.308677	1	1	1	1	0	1	0	0
ENSG00000123405.14	NFE2	1.77725	-2.3674	2.37942	0.139475	0.319175	1	1	1	1	0	1	0	0
ENSG00000285781.1	RP11-192P3.5	1.77717	-2.22553	1.8225	0.190772	0.392679	0	3	1	0	0	0	0	1
ENSG00000119508.18	NR4A3	1.77702	-0.200439	21.176	0.000139429	0.00144681	12	13	17	8	6	4	3	4
ENSG00000228838.1	RP4-784A16.2	1.77699	-2.22544	1.80826	0.192447	0.39501	1	0	2	1	0	1	0	0
ENSG00000260400.1	RP11-119F7.5	1.7764	-0.866824	6.79602	0.0161133	0.065257	9	1	4	7	4	0	1	2
ENSG00000149635.3	OCSTAMP	1.77632	-0.732531	7.00582	0.0147452	0.0609649	4	4	13	3	0	1	5	2
ENSG00000176268.5	CYCSP34	1.77549	-2.31855	2.15634	0.156167	0.343886	1	2	1	0	0	1	0	0
ENSG00000286965.1	RP11-521H5.1	1.77524	-2.18097	2.18814	0.153284	0.339555	1	1	2	0	0	1	0	0
ENSG00000282142.2	CH17-174L20.1	1.77433	-2.18112	1.55976	0.224854	0.438789	0	4	0	0	0	1	0	0
ENSG00000172969.8	FRG2C	1.77383	-2.27125	1.7329	0.20162	0.407077	0	3	1	0	0	1	0	0
ENSG00000249487.7	LINC01586	1.77304	-2.27126	1.89945	0.182025	0.381453	0	1	3	0	0	1	0	0
ENSG00000287248.1	CTD-2008L17.3	1.76991	-0.481501	6.96665	0.0149905	0.0617025	9	13	10	7	0	4	0	9
ENSG00000262533.1	RP11-667K14.4	1.76913	1.27591	4.62804	0.0427193	0.136427	44	67	47	13	0	57	0	0
ENSG00000225339.4	RP11-513I15.6	1.76853	5.15578	94.1941	2.11806e-09	7.33842e-07	566	735	456	702	180	173	323	191
ENSG00000268400.5	CTD-3214H19.4	1.76214	-0.901851	4.44966	0.0465418	0.145184	17	10	3	2	9	2	0	0
ENSG00000203546.7	RP11-176H8.1	1.75729	0.152516	9.25573	0.00598695	0.0300106	12	9	7	40	7	4	11	2
ENSG00000279352.1	RP11-411B10.7	1.7505	-1.61023	5.6318	0.0268174	0.0964385	4	4	2	5	2	0	2	1
ENSG00000169840.5	GSX1	1.73892	-0.654508	8.43912	0.0082218	0.0386059	7	3	7	9	1	0	5	3
ENSG00000257884.2	RP11-597A11.4	1.73829	-1.24725	6.21433	0.0207057	0.0791984	4	5	6	3	2	3	0	1
ENSG00000254363.6	CTB-131B5.5	1.73695	-0.716351	9.30174	0.0058827	0.0296222	9	7	4	9	3	4	2	1
ENSG00000206262.9	FOXL2NB	1.73558	-1.58106	4.2921	0.0502425	0.153089	4	6	1	4	3	2	0	0
ENSG00000239483.1	RPS15AP16	1.73529	-1.55251	4.92093	0.0371874	0.123314	5	4	2	4	1	0	1	3
ENSG00000170396.9	ZNF804A	1.73174	-0.135189	21.9517	0.000113761	0.00123995	11	14	20	17	6	2	7	7
ENSG00000237461.2	RP11-554F20.1	1.73087	-1.34184	4.68429	0.0415885	0.133771	1	2	10	5	0	3	1	2
ENSG00000235750.10	KIAA0040	1.72696	-0.304844	16.9959	0.000448857	0.00372277	10	9	12	6	3	3	5	2
ENSG00000273174.1	RP11-434H6.6	1.72199	-1.55224	5.19862	0.0326777	0.112007	2	7	2	4	1	1	0	3
ENSG00000196660.11	SLC30A10	1.72157	-0.316411	16.4817	0.000523177	0.00420074	13	17	6	9	5	2	5	4
ENSG00000165606.10	DRGX	1.72122	-1.2473	5.92544	0.0235163	0.0871055	2	5	3	5	0	3	1	1
ENSG00000285669.1	RP11-51J9.7	1.71952	-1.47052	3.64506	0.0693925	0.193975	2	2	4	4	0	1	3	0
ENSG00000177340.5	FLJ13224	1.71933	-1.61044	4.85349	0.0383857	0.126108	2	5	1	4	1	1	2	0
ENSG00000223837.2	XXbac-BPG181M17.4	1.71907	-1.73337	3.95964	0.059202	0.173054	3	2	3	4	2	1	1	0
ENSG00000223561.7	AC003090.1	1.7185	-1.67077	3.63818	0.069637	0.194455	1	8	2	1	0	0	3	1
ENSG00000266728.5	AC015688.3	1.71846	-1.7018	2.97482	0.0986228	0.251416	3	2	6	1	1	0	2	1
ENSG00000235916.1	MRPS18CP7	1.71726	-1.64002	4.60172	0.0432603	0.137583	3	2	4	3	2	1	1	0
ENSG00000257489.6	RP11-175P13.3	1.71382	-1.27066	7.03657	0.0145557	0.0602986	8	3	6	3	3	0	3	1
ENSG00000072315.4	TRPC5	1.71298	-1.07447	6.4295	0.0188557	0.073638	6	5	3	9	4	2	0	2
ENSG00000270728.1	RP4-657E11.10	1.71237	-1.76575	3.83065	0.0631583	0.181064	2	4	5	1	3	1	0	0
ENSG00000134339.9	SAA2	1.70913	-1.79885	4.1086	0.0549802	0.163863	1	5	3	3	0	1	2	1
ENSG00000266680.1	RP5-1148A21.3	1.7078	-1.61047	5.24845	0.0319353	0.110117	1	4	4	3	1	1	1	1
ENSG00000234477.1	AC004231.2	1.69583	-1.67051	3.18772	0.0880176	0.231566	1	2	7	2	0	2	1	1
ENSG00000228638.1	FCF1P2	1.69501	-0.0695351	5.97802	0.0229746	0.0857211	22	20	4	24	3	14	2	6
ENSG00000136872.20	ALDOB	1.69434	-1.15906	5.69043	0.0261189	0.0944859	6	5	2	4	2	0	4	0
ENSG00000254741.1	RP11-661A12.7	1.69005	-2.05541	2.13554	0.160302	0.350439	0	1	1	7	3	0	0	0
ENSG00000153234.15	NR4A2	1.68848	0.0806819	18.5005	0.000290268	0.00260488	15	12	24	9	6	2	9	5
ENSG00000236299.8	RP11-340I6.7	1.6862	-1.8332	2.88221	0.103696	0.25985	3	2	4	0	1	0	2	0
ENSG00000235308.1	RP11-82K18.2	1.68078	-1.83284	3.32148	0.0820313	0.219725	5	2	1	1	1	0	1	1
ENSG00000260647.1	RP1-178F10.1	1.67997	-1.63997	5.93397	0.0234274	0.0868839	2	6	3	6	1	1	3	1
ENSG00000271382.1	RP11-1060G2.2	1.67928	-1.76576	3.72534	0.066613	0.188509	2	4	1	2	0	0	2	1
ENSG00000287671.1	RP11-728E14.5	1.67913	-1.79918	3.19199	0.0878187	0.231218	3	3	2	1	0	0	2	1
ENSG00000239322.1	ATP6V1B1-AS1	1.67898	-1.83272	2.95629	0.0996145	0.253291	5	0	2	2	1	1	1	0
ENSG00000188050.3	RNF133	1.67802	-2.41827	1.54227	0.22943	0.444926	0	0	0	1	0	0	0	0
ENSG00000248708.2	LINC02144	1.67802	-2.41827	1.54227	0.22943	0.444926	0	0	0	1	0	0	0	0
ENSG00000287374.1	CH17-262O2.5	1.67802	-2.41827	1.54227	0.22943	0.444926	0	0	0	1	0	0	0	0
ENSG00000275228.1	RP11-370I10.10	1.67802	-2.36763	1.48245	0.238334	0.455682	0	0	0	1	0	0	0	0
ENSG00000286060.1	RP11-453F18.1	1.67801	-2.31866	1.64698	0.214841	0.426011	0	0	0	1	0	0	0	0
ENSG00000234647.2	RP11-503C24.4	1.67801	-2.27135	1.44881	0.243538	0.461797	0	0	0	1	0	0	0	0
ENSG00000242659.1	RP11-271C24.2	1.678	-2.27127	1.38732	0.253436	0.474304	0	0	0	1	0	0	0	0
ENSG00000223725.6	AC007879.5	1.67791	-2.41825	1.53886	0.229925	0.445394	1	0	0	0	0	0	0	0
ENSG00000256159.1	RP11-820K3.4	1.67791	-2.41827	1.54241	0.229409	0.444926	1	0	0	0	0	0	0	0
ENSG00000264812.1	RP13-20L14.4	1.67791	-2.41826	1.54089	0.229629	0.445063	1	0	0	0	0	0	0	0
ENSG00000267808.1	AC018755.17	1.67791	-2.41836	1.55705	0.227294	0.442024	1	0	0	0	0	0	0	0
ENSG00000257880.1	RP11-769N19.2	1.67791	-2.36774	1.49869	0.235873	0.453011	1	0	0	0	0	0	0	0
ENSG00000281969.1	XXyac-YR38GF2.1	1.67791	-2.36767	1.48752	0.237562	0.454818	1	0	0	0	0	0	0	0
ENSG00000266010.2	GATA6-AS1	1.67791	-2.36755	1.46989	0.240259	0.45766	1	0	0	0	0	0	0	0
ENSG00000279092.1	RP11-1H8.5	1.6779	-2.31875	1.4099	0.249741	0.469612	1	0	0	0	0	0	0	0
ENSG00000248115.1	RP11-752D24.2	1.6779	-2.27131	1.39139	0.252765	0.4734	1	0	0	0	0	0	0	0
ENSG00000230847.4	OCLNP1	1.6779	-2.27119	1.30676	0.267216	0.489504	1	0	0	0	0	0	0	0
ENSG00000184785.6	SMIM10	1.67721	-1.47043	3.21946	0.0865529	0.228668	1	4	0	4	2	0	0	1
ENSG00000281560.1	LSINCT5	1.67653	-1.20197	5.41606	0.0295739	0.104154	6	1	1	9	1	2	2	1
ENSG00000279675.1	RP11-454H19.2	1.67625	-1.93986	3.68024	0.0681585	0.191532	2	2	3	2	0	1	2	0
ENSG00000279217.1	CTA-212A2.3	1.67592	-2.31877	1.66559	0.212373	0.422654	0	1	0	0	0	0	0	0
ENSG00000175664.10	TEX26	1.67591	-2.36757	1.47219	0.239905	0.45734	0	1	0	0	0	0	0	0
ENSG00000120279.6	MYCT1	1.67591	-2.41828	1.54349	0.229252	0.444828	0	1	0	0	0	0	0	0
ENSG00000171431.4	KRT20	1.67591	-2.41828	1.54349	0.229252	0.444828	0	1	0	0	0	0	0	0
ENSG00000213809.9	KLRK1	1.67591	-2.41828	1.54349	0.229252	0.444828	0	1	0	0	0	0	0	0
ENSG00000236636.2	RP11-211A18.1	1.67591	-2.41828	1.54349	0.229252	0.444828	0	1	0	0	0	0	0	0
ENSG00000260118.1	RP6-201G10.2	1.67591	-2.41838	1.55972	0.226912	0.44159	0	1	0	0	0	0	0	0
ENSG00000253433.1	NCRNA00250	1.67545	-2.36767	1.48727	0.2376	0.454837	0	0	1	0	0	0	0	0
ENSG00000143365.19	RORC	1.67545	-2.36768	1.69669	0.209866	0.419261	0	0	1	0	0	0	0	0
ENSG00000248202.2	LINC02234	1.67545	-2.36779	1.50489	0.234943	0.451762	0	0	1	0	0	0	0	0
ENSG00000251680.6	CTC-575N7.1	1.67545	-2.41827	1.54204	0.229463	0.444951	0	0	1	0	0	0	0	0
ENSG00000257195.1	HNRNPA1P50	1.67545	-2.41838	1.56033	0.226824	0.441482	0	0	1	0	0	0	0	0
ENSG00000165985.10	C1QL3	1.67435	-1.86754	2.88959	0.103281	0.259084	2	1	3	3	2	1	0	0
ENSG00000231544.3	RSL24D1P11	1.67364	-1.83313	2.52309	0.12649	0.29826	0	6	2	1	1	0	1	1
ENSG00000286512.1	RP1-80B9.4	1.67355	-1.97737	2.9786	0.0984221	0.251066	2	4	1	2	2	1	0	0
ENSG00000278275.2	RP11-55J15.2	1.67306	-1.11623	6.77293	0.0162723	0.0657662	6	7	1	3	1	1	2	2
ENSG00000165071.15	TMEM71	1.67298	-1.90333	2.9628	0.0992645	0.25261	1	2	3	3	2	1	0	0
ENSG00000287055.1	RP5-895C5.4	1.67272	-1.83278	2.36673	0.138236	0.317021	2	2	5	0	0	1	2	0
ENSG00000115665.9	SLC5A7	1.67159	0.744527	19.7013	0.000207558	0.0019927	19	34	29	28	15	7	10	9
ENSG00000261359.2	PYCARD-AS1	1.67146	-1.93981	3.1382	0.0903611	0.23616	2	3	3	1	2	1	0	0
ENSG00000237359.2	RP11-509J21.2	1.67053	-2.01573	3.3105	0.0825044	0.2207	3	3	1	2	0	0	1	2
ENSG00000240720.10	LRRD1	1.67037	-2.01574	3.24815	0.0852527	0.226227	1	2	2	4	0	0	1	2
ENSG00000230330.1	HMGN2P3	1.6688	-1.93969	3.28018	0.0838281	0.223453	4	3	1	1	1	0	0	2
ENSG00000275106.1	RP11-309L24.10	1.6679	-1.63999	2.362	0.138612	0.317671	0	0	3	6	1	1	0	1
ENSG00000288577.1	RP4-687F11.2	1.66771	-1.76573	4.47711	0.0459291	0.143775	3	2	2	2	0	1	1	1
ENSG00000175793.12	SFN	1.66737	-1.73327	3.64141	0.0695222	0.19422	3	2	3	1	1	0	0	2
ENSG00000056291.19	NPFFR2	1.66682	-1.24745	4.77046	0.0399212	0.129711	4	6	5	2	0	3	3	0
ENSG00000279549.1	AP000437.3	1.66634	-1.13727	7.7202	0.0109699	0.0484088	9	4	3	6	2	1	4	1
ENSG00000224986.2	PPP1R8P1	1.66474	-1.70124	2.70974	0.11398	0.277604	4	0	4	1	0	2	1	0
ENSG00000260160.1	CTC-471J1.2	1.66411	-1.8675	3.1503	0.0897818	0.235024	3	1	2	3	1	2	0	0
ENSG00000264520.1	RP4-777O23.2	1.65985	-1.44309	5.95144	0.0232467	0.0864219	3	6	4	4	2	2	0	2
ENSG00000185686.18	PRAME	1.65748	-1.09506	7.70093	0.0110564	0.0487182	10	6	4	2	2	1	3	2
ENSG00000238207.2	AC009312.1	1.65702	-1.76532	3.07326	0.0935446	0.242246	3	3	0	3	0	2	0	1
ENSG00000251357.4	AP000350.10	1.65368	-1.73298	1.73684	0.201127	0.40643	0	4	0	5	0	3	0	0
ENSG00000272777.1	RP11-571L19.8	1.64779	-1.39239	5.01775	0.03554	0.119148	1	3	6	4	1	1	3	0
ENSG00000272109.2	CTD-2260A17.3	1.64729	-1.52452	4.05403	0.0564858	0.166967	5	3	2	4	1	0	2	2
ENSG00000256720.1	BTG1P1	1.64594	-1.93963	2.19165	0.15297	0.339066	0	5	4	0	0	2	0	1
ENSG00000280435.1	RP4-555D20.1	1.63689	-1.07551	6.17273	0.0210863	0.0802957	6	6	5	2	2	1	4	0
ENSG00000186594.14	MIR22HG	1.63459	2.07517	77.8106	1.14396e-08	1.76323e-06	59	56	72	51	20	24	27	20
ENSG00000286240.1	RP5-1141E15.2	1.63352	-1.4967	4.38065	0.0481232	0.148577	6	3	4	1	0	2	2	1
ENSG00000286107.1	RP11-233G1.8	1.62847	1.92932	10.0138	0.00450057	0.0237738	75	70	70	74	12	37	0	59
ENSG00000237719.1	RP1-179N16.3	1.61591	-1.79913	1.93782	0.177849	0.375858	3	1	0	2	0	0	2	0
ENSG00000101695.9	RNF125	1.61542	-0.732652	10.2866	0.00406947	0.0218806	4	9	6	10	3	1	4	3
ENSG00000232457.4	SLC16A6P1	1.61531	-0.653793	7.01787	0.0146706	0.06072	14	10	3	5	0	4	3	5
ENSG00000221571.3	RNU6ATAC35P	1.6149	-2.016	2.30278	0.143413	0.325441	1	1	1	3	0	0	2	0
ENSG00000226647.2	RP11-336A10.2	1.61343	-2.09625	1.90744	0.181146	0.380503	1	1	0	4	2	0	0	0
ENSG00000275379.2	H3C11	1.61321	-2.18105	2.64246	0.118313	0.284554	2	1	1	2	1	0	1	0
ENSG00000260646.1	LA16c-385E7.1	1.61318	-2.09634	2.20368	0.1519	0.337535	3	2	1	0	0	0	2	0
ENSG00000203711.14	C6orf99	1.61275	-1.86784	2.15524	0.156267	0.343981	0	0	2	4	1	0	1	0
ENSG00000254459.1	RP11-91P24.7	1.61171	-2.0963	1.82661	0.190292	0.392069	2	2	0	2	2	0	0	0
ENSG00000286764.1	WI2-933P11.1	1.6117	-2.13812	2.32347	0.141713	0.322694	0	2	1	3	1	0	1	0
ENSG00000111834.13	RSPH4A	1.61123	-0.18929	15.9011	0.00062371	0.00483275	9	20	10	13	6	5	6	3
ENSG00000286677.1	KB-1836B5.5	1.61107	-2.01608	3.0524	0.0945949	0.244115	2	1	2	1	1	0	1	0
ENSG00000282278.1	RP11-231C18.3	1.61074	-1.97775	1.37316	0.253832	0.474667	4	0	2	0	2	0	0	0
ENSG00000170689.10	HOXB9	1.60994	-2.09615	2.39889	0.135718	0.312854	1	3	1	1	1	0	1	0
ENSG00000146192.15	FGD2	1.60986	-2.09614	2.15884	0.155938	0.343582	2	3	1	0	1	0	1	0
ENSG00000204584.1	RP11-304F15.3	1.6098	-2.09619	2.23682	0.148996	0.333841	1	2	1	2	2	0	0	0
ENSG00000258777.1	HIF1A-AS1	1.60961	-2.13815	2.69973	0.114613	0.278802	1	2	2	1	1	0	1	0
ENSG00000272472.1	RP11-95G17.2	1.60936	-2.09609	2.21638	0.150779	0.336122	2	1	2	1	2	0	0	0
ENSG00000151062.15	CACNA2D4	1.60516	-1.83299	2.02986	0.168297	0.362112	5	0	0	1	1	0	0	1
ENSG00000272425.1	RP11-363E6.4	1.60511	-0.716506	8.60914	0.00768959	0.0368188	4	5	15	5	1	3	5	2
ENSG00000286877.1	CTD-2036P10.7	1.6042	-2.22539	1.86024	0.188577	0.389604	0	2	0	4	0	0	1	1
ENSG00000230690.2	AC013402.5	1.6041	-2.18101	2.25426	0.147495	0.331606	1	2	0	3	0	0	1	1
ENSG00000212122.4	TSSK1B	1.60393	-2.18084	1.82943	0.189964	0.391694	5	0	0	1	0	1	1	0
ENSG00000276790.1	RP11-290H9.5	1.60337	-1.8677	2.94632	0.100153	0.253977	3	4	0	4	2	0	1	1
ENSG00000287743.1	RP4-739H11.5	1.60315	-1.83309	2.53498	0.125646	0.296903	3	0	2	1	0	0	1	1
ENSG00000259589.2	RP11-317G6.1	1.60227	-2.05555	1.60643	0.218274	0.4305	3	3	0	0	0	0	1	1
ENSG00000287035.1	CTC-204F22.7	1.60216	-2.01579	2.22804	0.149759	0.33482	2	0	1	3	0	1	1	0
ENSG00000270482.1	RP11-131L12.2	1.60209	-2.13781	2.23409	0.149233	0.334157	3	0	1	2	0	1	1	0
ENSG00000058866.15	DGKG	1.60194	-2.09611	2.07278	0.164057	0.355894	1	1	1	3	1	0	0	1
ENSG00000261268.1	RP11-308D13.3	1.60178	-2.18101	2.50939	0.12747	0.299973	3	1	1	1	1	0	0	1
ENSG00000267062.1	CTD-2659N19.10	1.60143	-1.90357	1.85483	0.187036	0.387873	0	0	3	3	0	0	1	1
ENSG00000272681.2	FAM223B	1.60053	-2.09601	2.4236	0.13382	0.309819	2	1	1	2	0	1	1	0
ENSG00000279245.1	FAM223A	1.60053	-2.09601	2.4236	0.13382	0.309819	2	1	1	2	0	1	1	0
ENSG00000214773.1	RP11-717D12.1	1.6003	-2.05543	2.64564	0.118104	0.2842	1	2	1	2	1	0	0	1
ENSG00000264895.1	RP11-421E14.2	1.60022	-2.13797	2.62473	0.119487	0.286457	2	2	1	1	1	0	0	1
ENSG00000272361.2	GS1-166A23.2	1.59995	-2.01591	2.60208	0.121008	0.289222	1	1	2	2	1	0	0	1
ENSG00000261770.1	CTC-459F4.1	1.59991	-1.79883	2.49088	0.12881	0.30211	3	0	0	8	1	0	1	2
ENSG00000241135.6	LINC00881	1.59986	-2.18102	2.59923	0.121201	0.289459	2	1	2	1	1	0	0	1
ENSG00000224614.2	TNK2-AS1	1.59946	-1.97764	1.91747	0.180049	0.378888	0	0	4	2	0	0	1	1
ENSG00000260619.1	RP11-775C24.3	1.59904	-1.1372	5.30429	0.0311259	0.107998	4	6	4	2	2	0	3	1
ENSG00000147606.9	SLC26A7	1.59889	-2.18098	2.12709	0.158875	0.348117	0	4	1	1	0	0	1	1
ENSG00000248830.1	ZNF807P	1.59848	-2.0552	1.96375	0.175092	0.372239	1	0	2	3	1	1	0	0
ENSG00000184697.7	CLDN6	1.59833	-1.94014	2.5672	0.123393	0.293256	1	2	2	1	1	0	0	1
ENSG00000233874.2	MFN1P1	1.59811	-2.01601	2.52521	0.126339	0.298032	1	2	3	0	0	0	1	1
ENSG00000231419.6	LINC00689	1.5978	-2.22547	2.06623	0.166899	0.360141	0	1	4	1	0	0	1	1
ENSG00000244471.6	RP11-78J21.5	1.59758	-2.13798	1.95398	0.176124	0.373468	1	0	4	1	1	0	0	1
ENSG00000276600.5	RAB7B	1.59669	-1.8327	2.0707	0.164259	0.356081	1	1	3	1	0	1	1	0
ENSG00000213608.5	SLC25A14P1	1.59665	-2.01595	2.42022	0.134077	0.310207	1	1	3	1	0	1	1	0
ENSG00000234937.1	RP11-101O6.2	1.59656	-2.05547	2.27542	0.145697	0.329088	2	1	3	0	0	1	1	0
ENSG00000274430.1	ENSG10010135640.1	1.59429	-0.976417	4.63864	0.0425036	0.135879	6	9	8	1	1	3	1	4
ENSG00000135318.12	NT5E	1.59326	-0.797478	9.76497	0.00493792	0.0256677	9	8	8	4	1	3	2	5
ENSG00000215182.8	MUC5AC	1.59319	-1.36712	4.22817	0.0518383	0.156761	1	2	5	8	1	2	3	0
ENSG00000261340.1	LINC01616	1.59214	-2.05533	1.60264	0.218799	0.431167	0	0	2	4	0	0	0	2
ENSG00000251495.1	PPIAP11	1.59211	-2.13784	1.76381	0.197794	0.401991	4	1	1	0	0	0	0	2
ENSG00000140527.15	WDR93	1.59131	-0.593927	11.8928	0.00229465	0.0138103	10	8	7	9	1	5	3	4
ENSG00000224157.1	HCG14	1.58954	-1.97719	1.79181	0.194404	0.397711	5	0	0	1	0	2	0	0
ENSG00000286825.1	RP11-934B9.9	1.58907	-1.61026	3.46267	0.0762164	0.208092	0	3	2	6	2	1	0	1
ENSG00000075073.15	TACR2	1.58898	-2.01587	2.14007	0.157666	0.346263	1	0	2	3	0	1	0	1
ENSG00000187762.5	HSPE1P11	1.58881	-2.13786	2.06441	0.164873	0.357077	0	2	2	2	0	0	0	2
ENSG00000124003.13	MOGAT1	1.5887	-1.83295	3.41834	0.0779894	0.211576	1	5	3	2	1	0	1	2
ENSG00000240823.3	RN7SL23P	1.58804	-2.09609	1.83155	0.189717	0.391275	1	0	4	1	0	0	0	2
ENSG00000258984.5	UBE2F-SCLY	1.58695	-0.125948	6.66346	0.0170503	0.0682132	5	18	15	8	2	0	9	7
ENSG00000237772.2	LINC02631	1.58692	-2.09572	1.80544	0.192781	0.395548	1	0	3	2	0	1	0	1
ENSG00000244752.3	CRYBB2	1.58447	-1.3921	3.46542	0.0761078	0.207857	4	1	6	5	0	3	3	0
ENSG00000274987.1	RP11-295I5.3	1.58313	-1.5812	4.01246	0.0576641	0.169652	4	3	1	3	1	1	0	2
ENSG00000229587.2	RP11-197P3.5	1.58293	-2.05534	2.21569	0.15084	0.336227	1	3	1	1	0	2	0	0
ENSG00000228187.1	RP11-363H12.1	1.58215	-1.67025	4.0645	0.0561934	0.166404	4	1	4	2	0	1	1	2
ENSG00000162676.12	GFI1	1.57873	-0.831813	8.14077	0.00925703	0.0424166	6	3	10	7	3	4	2	1
ENSG00000275559.1	ENSG10010139202.1	1.57807	-1.01508	4.26032	0.0510289	0.154871	7	4	14	1	4	1	1	4
ENSG00000272688.1	RP13-270P17.3	1.57765	-1.34184	3.3371	0.0813636	0.218313	8	3	0	5	2	4	0	0
ENSG00000214892.4	USP8P1	1.57337	-1.15835	5.94149	0.0233495	0.086711	3	9	4	5	2	3	1	2
ENSG00000230071.2	RPL4P6	1.57139	-1.44345	3.01245	0.0966445	0.247787	0	3	5	3	0	1	0	3
ENSG00000177447.6	CBX3P1	1.57062	-1.03497	7.41297	0.0124433	0.053493	4	5	3	11	3	1	4	1
ENSG00000261534.1	RP11-244O19.1	1.56813	-0.975267	2.69575	0.114866	0.279153	9	0	25	0	1	3	0	9
ENSG00000257176.3	RP11-996F15.2	1.56116	0.6858	30.3508	1.5615e-05	0.000264728	24	32	23	32	16	8	15	6
ENSG00000234841.4	RP11-119H12.4	1.55674	-1.4174	4.42577	0.0470824	0.146442	6	1	5	6	5	1	0	1
ENSG00000023839.12	ABCC2	1.55565	-0.146988	15.9714	0.000610475	0.00475014	14	11	17	10	8	2	8	3
ENSG00000254721.1	RP11-805J14.5	1.55543	-0.509197	2.71423	0.113697	0.277131	35	5	0	9	18	2	0	0
ENSG00000233610.1	LINC00462	1.54715	-1.13749	7.0359	0.0145598	0.0603017	3	6	6	3	2	1	2	2
ENSG00000269246.1	CTC-246B18.10	1.5468	-1.34195	5.35334	0.0304338	0.106267	1	8	3	6	2	2	2	1
ENSG00000243775.2	OSTCP1	1.54602	-1.15875	7.3727	0.0126521	0.0541633	4	4	6	4	3	2	1	1
ENSG00000232586.1	KIAA1614-AS1	1.54532	-0.867118	4.427	0.0470544	0.146387	4	7	3	9	3	2	0	4
ENSG00000258967.1	HMGN1P3	1.54396	-1.7015	3.9505	0.0594728	0.173644	5	2	2	4	0	1	3	1
ENSG00000174827.14	PDZK1	1.54165	-0.523679	7.58444	0.0115957	0.0506543	4	10	12	9	7	5	2	0
ENSG00000101096.20	NFATC2	1.53961	-0.565241	10.5545	0.00368992	0.0202288	15	7	9	4	4	4	3	3
ENSG00000229586.2	TNPO1P3	1.5389	-1.34242	4.15593	0.0537114	0.161035	11	1	6	2	2	1	5	0
ENSG00000233594.2	BTF3P5	1.53243	-0.884684	7.1412	0.0139311	0.0583394	3	6	4	12	3	3	3	1
ENSG00000235251.2	RP11-384B12.2	1.5314	-1.46984	3.90181	0.0609398	0.176384	2	6	1	4	1	1	1	2
ENSG00000134548.11	SPX	1.52929	-1.49691	5.10194	0.034174	0.115647	3	3	5	2	1	1	1	2
ENSG00000264801.1	ERVFRD-3	1.52827	-1.766	2.59907	0.121212	0.289459	2	2	1	3	1	0	2	0
ENSG00000229334.1	AC046143.3	1.52738	-0.179386	15.8362	0.000636197	0.00491027	10	14	13	12	6	4	6	4
ENSG00000126778.12	SIX1	1.52698	-1.22472	4.61172	0.0430538	0.137179	9	6	5	0	3	1	3	1
ENSG00000253540.5	FAM86HP	1.52671	0.667519	25.3866	4.82841e-05	0.000632928	20	24	22	33	12	9	15	5
ENSG00000232453.7	LINC02777	1.5244	-1.31794	3.96305	0.0591014	0.172889	2	4	4	3	2	3	0	0
ENSG00000259932.1	CTD-2651B20.7	1.52331	-1.83315	1.98481	0.172892	0.368977	6	0	1	1	0	0	2	1
ENSG00000185652.12	NTF3	1.52262	0.756458	22.4605	9.97566e-05	0.00112267	15	33	29	27	8	11	18	6
ENSG00000183273.7	CCDC60	1.51932	-2.09599	2.36739	0.140422	0.320627	4	1	0	3	1	1	1	0
ENSG00000197487.9	GALP	1.51927	-1.93984	2.61615	0.120061	0.287533	3	3	0	2	1	0	1	1
ENSG00000277194.1	SNORD22	1.51619	-1.391	1.51213	0.231831	0.447608	1	0	0	12	0	5	0	0
ENSG00000233783.8	AP001442.2	1.51441	-1.93987	2.41879	0.134187	0.31033	2	3	2	1	0	1	2	0
ENSG00000159248.5	GJD2	1.51422	-1.83296	3.63076	0.0699013	0.194946	2	2	2	2	1	1	1	0
ENSG00000249026.2	CTNNA1P1	1.51258	-2.09604	2.70033	0.116814	0.282076	2	2	2	2	2	1	0	0
ENSG00000144891.19	AGTR1	1.51076	-1.18015	6.29179	0.0200174	0.0770768	4	8	6	2	2	2	2	2
ENSG00000264235.6	MYL12-AS1	1.50823	-0.551946	11.0551	0.00308096	0.0175471	6	12	6	10	4	2	5	3
ENSG00000239911.2	PRKAG2-AS1	1.50723	-1.79887	2.2539	0.147525	0.33162	5	2	0	1	1	1	0	1
ENSG00000250377.2	CTC-467M3.3	1.5069	-2.05532	2.52806	0.126137	0.297707	1	3	1	3	1	0	0	2
ENSG00000280300.1	RP11-338K17.10	1.50685	-0.867881	5.20334	0.0326065	0.111819	2	8	7	5	4	0	4	1
ENSG00000275143.1	SCARNA16	1.50583	-1.97734	1.65405	0.211808	0.421924	0	5	0	3	1	0	0	2
ENSG00000213590.2	RP11-229P13.2	1.50574	-1.34218	4.2181	0.052095	0.157351	6	4	0	5	3	1	1	1
ENSG00000242689.3	CNTF	1.50557	-0.417015	9.4842	0.00548863	0.0279289	7	6	11	10	4	4	5	1
ENSG00000285872.1	RP11-83M8.1	1.50509	-1.97739	2.48525	0.129221	0.302689	1	3	2	2	1	0	0	2
ENSG00000270813.2	NANOGNBP3	1.50494	-1.86772	2.68252	0.11571	0.280144	4	1	2	1	1	1	0	1
ENSG00000079112.10	CDH17	1.50437	-2.01571	2.32212	0.141823	0.322813	2	5	0	1	0	1	1	1
ENSG00000175287.19	PHYHD1	1.50363	-1.90312	1.86977	0.18534	0.385539	0	0	3	5	0	2	1	0
ENSG00000257921.6	RP11-571M6.15	1.5028	-1.05607	1.2193	0.281455	0.503625	2	3	1	2	0	0	0	3
ENSG00000163491.16	NEK10	1.50183	-0.958338	7.53177	0.011849	0.051449	5	7	7	3	3	1	4	1
ENSG00000272912.1	RP11-724N1.1	1.50168	-1.79901	2.26175	0.146855	0.330759	0	0	5	3	1	1	0	1
ENSG00000273509.1	CNTNAP3P1	1.49949	-2.09593	2.00048	0.173468	0.369761	2	5	1	0	0	2	1	0
ENSG00000230417.12	LINC00856	1.49932	-2.05536	1.98595	0.172773	0.368934	0	0	6	2	1	1	0	1
ENSG00000280171.1	CTD-2542C24.14	1.49897	-1.97719	2.13347	0.15828	0.347302	2	1	2	3	0	0	0	3
ENSG00000274010.1	ZFP91P1	1.49872	-1.79894	2.56702	0.123406	0.293261	1	2	5	0	1	1	0	1
ENSG00000136114.17	THSD1	1.49806	-1.01496	7.40011	0.0125095	0.0536773	3	6	11	7	3	3	2	3
ENSG00000151364.17	KCTD14	1.49545	-0.565675	8.66551	0.00752165	0.0361209	9	8	7	12	6	3	4	2
ENSG00000171819.5	ANGPTL7	1.4931	-1.8328	2.36229	0.138589	0.317645	3	1	2	2	0	2	0	1
ENSG00000271013.1	LRRC37A9P	1.49159	-0.684651	9.3893	0.00568983	0.0287976	7	6	6	10	4	3	3	2
ENSG00000167034.10	NKX3-1	1.49156	-1.86738	2.80755	0.108008	0.266911	3	2	2	1	0	2	0	1
ENSG00000267179.1	CTD-2006C1.13	1.48906	-0.223552	2.59548	0.121455	0.289869	3	9	31	1	4	8	1	5
ENSG00000250490.1	LINC02145	1.48748	-1.46984	4.49449	0.045546	0.142883	3	4	2	6	2	2	0	2
ENSG00000250302.3	LINC01618	1.48499	-0.939069	1.68198	0.208128	0.416693	13	0	4	0	1	1	5	0
ENSG00000281593.1	GS1-114I9.3	1.48091	-0.494806	4.2298	0.0517971	0.15667	16	17	6	0	2	7	0	7
ENSG00000239002.3	SCARNA10	1.47769	-1.58037	2.32737	0.141395	0.32213	0	1	5	9	1	3	0	2
ENSG00000261003.1	RP1-140C12.2	1.4762	-1.76622	2.46714	0.130552	0.305083	0	3	3	4	2	0	2	0
ENSG00000186919.13	ZACN	1.47573	-1.79888	2.45524	0.131436	0.306348	5	1	1	3	0	0	3	1
ENSG00000131771.14	PPP1R1B	1.47511	-1.70196	3.31432	0.0823394	0.220397	2	2	3	3	3	0	1	0
ENSG00000259286.3	RP11-696L21.2	1.47298	-1.7017	2.5242	0.126411	0.29815	5	1	2	2	0	0	3	1
ENSG00000277270.2	RP5-827E24.1	1.47283	-1.34198	5.17421	0.0330484	0.112942	4	5	2	6	1	1	3	2
ENSG00000189014.7	SHLD2P3	1.47258	0.458353	11.3946	0.00273125	0.0159122	23	21	31	15	8	15	8	7
ENSG00000115267.9	IFIH1	1.46815	-0.780508	6.45904	0.0186164	0.0729505	3	9	11	6	3	6	1	2
ENSG00000122254.7	HS3ST2	1.46712	-0.305224	7.24578	0.0133364	0.0563749	16	14	10	2	4	3	10	1
ENSG00000236852.1	SSBL2P	1.46668	-1.34232	3.91047	0.060676	0.175786	6	5	2	4	0	1	3	3
ENSG00000235313.1	HM13-IT1	1.46644	-1.79926	2.65233	0.117666	0.283441	3	2	5	0	1	0	2	1
ENSG00000273062.1	RALGPS2-AS1	1.46634	-1.70178	2.51474	0.127087	0.29931	2	2	4	2	0	1	3	0
ENSG00000286268.1	LL0XNC01-30I4.1	1.46513	-1.76608	2.22045	0.150422	0.335651	3	3	3	1	3	0	0	1
ENSG00000206633.1	SNORA80B	1.46485	-1.90328	2.12535	0.159038	0.34839	7	2	0	1	1	0	1	2
ENSG00000142700.12	DMRTA2	1.46481	-1.39227	2.96024	0.0994021	0.25289	2	3	1	4	3	1	0	0
ENSG00000128604.20	IRF5	1.46242	-1.52476	2.50216	0.127992	0.30071	6	2	2	0	0	0	2	2
ENSG00000204850.4	CTB-158D10.3	1.46236	-1.64015	1.81732	0.191379	0.393605	5	0	2	3	2	0	0	2
ENSG00000250519.7	RP11-680H20.2	1.46065	-1.58132	3.49831	0.0748243	0.205346	2	3	1	4	0	1	2	1
ENSG00000151773.13	CCDC122	1.46022	0.784661	28.5509	2.31965e-05	0.000359729	20	29	35	27	12	10	17	9
ENSG00000010319.7	SEMA3G	1.45838	-1.0749	4.81549	0.0390801	0.127707	6	7	1	5	1	1	5	1
ENSG00000259287.2	RP11-3D4.2	1.45805	-1.83264	2.3424	0.140179	0.320248	4	5	0	1	1	1	1	1
ENSG00000257964.1	RP11-133N21.10	1.45798	-1.76575	2.44932	0.131878	0.306913	2	2	1	5	1	2	1	0
ENSG00000156968.9	MPV17L	1.45636	1.61572	48.4462	5.55377e-07	2.19966e-05	41	53	60	44	22	19	28	17
ENSG00000255909.1	PDCD5P1	1.45525	-0.124978	13.4252	0.00136725	0.00915192	11	22	12	9	6	7	4	6
ENSG00000213194.3	CDK7P1	1.45518	-1.15875	6.25606	0.0203317	0.0780589	3	7	3	6	3	1	3	1
ENSG00000287086.1	RP11-572M14.1	1.45309	1.64553	5.80652	0.0247951	0.0907527	0	56	73	60	11	33	38	0
ENSG00000177675.9	CD163L1	1.45278	-1.22522	4.22706	0.0518667	0.156829	0	8	6	5	2	1	4	1
ENSG00000283537.2	RP11-298A10.3	1.45179	-1.41796	2.59139	0.121733	0.290332	0	5	11	3	1	1	5	1
ENSG00000264058.2	RP5-1028K7.3	1.45003	-0.652919	2.09994	0.16144	0.351925	15	6	5	5	0	0	0	13
ENSG00000272950.1	RP11-307C18.1	1.44968	-1.7988	2.07498	0.163842	0.355651	0	5	1	4	1	0	0	3
ENSG00000163017.14	ACTG2	1.44869	-0.538341	7.06051	0.0144101	0.0597843	6	7	14	10	7	1	5	3
ENSG00000205562.3	RP11-497E19.1	1.44681	-1.83287	2.05316	0.165979	0.358714	3	3	4	0	1	0	0	3
ENSG00000230069.3	LRRC37A15P	1.44677	-1.20284	2.3603	0.138747	0.317928	0	1	2	9	1	0	4	0
ENSG00000275401.1	RP4-564F22.7	1.44493	-1.39263	2.95242	0.0998228	0.253494	4	1	3	4	3	0	2	0
ENSG00000261211.1	RP1-80N2.3	1.44422	-0.063984	8.54093	0.00789839	0.0374815	20	8	14	8	7	1	12	2
ENSG00000163792.6	TCF23	1.44413	-1.67055	2.55651	0.124135	0.294463	0	2	7	1	0	1	1	2
ENSG00000285000.1	CTC-564N23.6	1.44068	1.66926	8.77871	0.00719648	0.0348373	56	65	49	39	0	48	14	27
ENSG00000236830.7	CBR3-AS1	1.44058	-1.61031	2.77948	0.109684	0.270029	1	3	3	3	0	1	0	3
ENSG00000231672.8	DIRC3	1.43864	-0.378066	8.90688	0.00684692	0.0334493	8	8	18	8	2	6	5	5
ENSG00000232581.1	AC079742.4	1.4368	-0.655878	1.81078	0.192149	0.394569	7	25	2	0	0	0	15	0
ENSG00000269535.1	CTD-2525I3.6	1.43622	-1.97676	1.60744	0.220206	0.432898	2	1	0	7	0	4	0	0
ENSG00000259663.2	CTD-2314G24.2	1.43555	-1.52454	2.63001	0.119137	0.285929	3	4	4	1	1	0	3	1
ENSG00000151572.18	ANO4	1.43407	-1.15898	4.89457	0.0376506	0.124223	7	2	9	5	4	0	5	1
ENSG00000251072.2	LMNB1-DT	1.42922	-2.36767	1.21545	0.282195	0.504181	1	0	0	2	0	0	1	0
ENSG00000226400.2	CTD-2269E23.2	1.42922	-2.36766	1.21403	0.28247	0.504466	1	0	0	2	0	0	1	0
ENSG00000250983.1	RP11-91K8.2	1.42922	-2.36765	1.21297	0.282675	0.504651	1	0	0	2	0	0	1	0
ENSG00000170289.13	CNGB3	1.4292	-2.2715	1.03081	0.321028	0.54256	0	0	0	3	0	0	1	0
ENSG00000270751.1	FBXW7-AS1	1.42912	-2.36766	1.21402	0.282472	0.504466	2	0	0	1	0	0	1	0
ENSG00000259163.2	RP11-1078H9.5	1.4291	-1.20279	4.89867	0.0375782	0.124093	3	8	7	3	4	1	2	2
ENSG00000279917.1	RP11-360N9.2	1.42906	-2.31878	1.22446	0.280467	0.502766	2	0	0	1	0	0	1	0
ENSG00000204779.2	FOXD4L5	1.42906	-2.22566	1.09286	0.307213	0.528732	1	0	0	2	0	0	1	0
ENSG00000286418.1	RP11-430H10.5	1.42897	-2.22561	1.23528	0.278408	0.500666	2	0	0	1	0	0	1	0
ENSG00000188133.6	TMEM215	1.42896	-2.31878	1.07994	0.310023	0.531409	3	0	0	0	0	0	1	0
ENSG00000285528.1	RP11-121C6.6	1.42887	-2.22551	1.07982	0.310049	0.531409	3	0	0	0	0	0	1	0
ENSG00000280426.1	RP11-837J7.3	1.42809	-1.18066	4.35963	0.048617	0.149651	2	7	9	3	2	2	4	1
ENSG00000261044.1	AP006547.3	1.4274	-2.36767	1.21276	0.282714	0.504651	0	1	0	2	0	0	1	0
ENSG00000266335.1	RP11-25O3.1	1.4274	-2.36767	1.21276	0.282714	0.504651	0	1	0	2	0	0	1	0
ENSG00000223711.1	AC091633.3	1.42731	-2.41829	1.32188	0.264557	0.486565	1	1	0	1	0	0	1	0
ENSG00000271180.1	COX5AP1	1.42731	-2.41829	1.32188	0.264557	0.486565	1	1	0	1	0	0	1	0
ENSG00000284727.1	RP11-489M13.4	1.42731	-2.36759	1.33762	0.259886	0.481653	1	1	0	1	0	0	1	0
ENSG00000222024.2	AC004945.1	1.42726	-2.3186	1.20176	0.284851	0.506754	1	1	0	1	0	0	1	0
ENSG00000159374.18	M1AP	1.42724	-2.31864	1.20642	0.283943	0.505821	1	0	0	2	1	0	0	0
ENSG00000236494.2	RP11-89N17.4	1.42722	-2.27147	1.12307	0.30078	0.522238	1	1	0	1	0	0	1	0
ENSG00000159904.11	ZNF890P	1.4272	-2.27137	1.26871	0.272171	0.494223	1	0	0	2	1	0	0	0
ENSG00000214745.2	GOT2P6	1.42719	-2.36763	1.20792	0.283652	0.505563	2	0	0	1	1	0	0	0
ENSG00000243104.1	MTND4LP14	1.42719	-2.36754	1.198	0.285585	0.507799	2	0	0	1	1	0	0	0
ENSG00000231445.1	TIMM8AP1	1.42718	-2.22568	1.2027	0.284668	0.506623	1	1	0	1	0	0	1	0
ENSG00000287158.1	RP11-412N9.1	1.42716	-2.31871	1.21358	0.282556	0.504518	2	1	0	0	0	0	1	0
ENSG00000188511.12	C22orf34	1.42716	-2.22559	1.23015	0.279381	0.501664	1	0	0	2	1	0	0	0
ENSG00000214465.3	SMARCE1P6	1.42714	-2.31874	1.10512	0.304579	0.526195	2	0	0	1	1	0	0	0
ENSG00000261131.1	RP11-93O14.2	1.42706	-2.22565	1.08954	0.307932	0.529344	2	0	0	1	1	0	0	0
ENSG00000263698.1	RP11-408H20.3	1.42703	-2.18132	1.07991	0.310028	0.531409	2	0	0	1	1	0	0	0
ENSG00000250673.2	REELD1	1.42703	-2.18117	1.17403	0.290333	0.512061	2	0	0	1	1	0	0	0
ENSG00000219329.1	RP11-397G5.2	1.427	-2.27145	1.02425	0.322537	0.543971	3	0	0	0	1	0	0	0
ENSG00000230005.2	SNAP47-AS1	1.427	-2.13804	1.33967	0.259532	0.481351	2	0	0	1	1	0	0	0
ENSG00000285771.1	RP11-69L16.8	1.42698	-2.36759	1.20271	0.284665	0.506623	0	0	1	2	0	0	1	0
ENSG00000275025.1	RP5-875H18.10	1.42697	-2.22565	0.998059	0.328666	0.54999	3	0	0	0	1	0	0	0
ENSG00000287510.1	RP5-1166H10.4	1.42684	-2.3188	1.36308	0.255529	0.476651	1	0	1	1	0	0	1	0
ENSG00000243339.3	RN7SL738P	1.42684	-2.31878	1.36137	0.255819	0.476957	1	0	1	1	0	0	1	0
ENSG00000225647.2	AC005487.2	1.4268	-2.27149	1.28275	0.269608	0.492225	1	0	1	1	0	0	1	0
ENSG00000231531.5	HINT1P1	1.4268	-2.27141	1.42517	0.245295	0.464007	1	0	1	1	0	0	1	0
ENSG00000255115.2	RP11-91P24.3	1.4268	-2.2714	1.4234	0.24558	0.464353	1	0	1	1	0	0	1	0
ENSG00000237292.1	LINC01732	1.4268	-2.27133	1.26297	0.273229	0.495341	1	0	1	1	0	0	1	0
ENSG00000267515.1	RP11-861E21.3	1.42679	-2.36768	1.21269	0.282728	0.504651	2	0	1	0	0	0	1	0
ENSG00000241597.2	CTD-2007H13.1	1.42677	-2.22572	1.38932	0.251138	0.471212	1	0	1	1	0	0	1	0
ENSG00000233735.5	RP11-567G24.3	1.4267	-2.2715	1.15809	0.293546	0.515479	2	0	1	0	0	0	1	0
ENSG00000274963.1	RN7SL600P	1.42667	-2.22562	1.23322	0.278797	0.501092	2	0	1	0	0	0	1	0
ENSG00000188761.13	BCL2L15	1.42664	-0.354112	8.02228	0.00970751	0.0440289	11	3	10	8	4	2	6	2
ENSG00000227379.2	PPIAP2	1.42661	-2.13826	1.05057	0.316538	0.537795	2	0	1	0	0	0	1	0
ENSG00000277027.1	RMRP	1.42568	1.46448	13.1825	0.00148154	0.00971725	48	51	62	52	21	16	23	34
ENSG00000267939.1	CTD-2325M2.1	1.42565	-0.156985	14.2955	0.00103051	0.00727058	15	12	13	10	6	5	8	3
ENSG00000168930.13	TRIM49	1.4255	-2.36761	1.20255	0.284697	0.506643	0	2	0	1	0	0	1	0
ENSG00000223601.2	EBLN1	1.42546	-2.31882	1.22413	0.28053	0.502822	0	2	0	1	0	0	1	0
ENSG00000230572.5	AC027612.3	1.42546	-2.31881	1.2231	0.280726	0.50297	0	2	0	1	0	0	1	0
ENSG00000234292.3	RP11-213H15.1	1.42544	-2.31874	1.10311	0.305009	0.526478	0	1	0	2	1	0	0	0
ENSG00000248458.2	RP4-598P13.1	1.42544	-2.31874	1.10311	0.305009	0.526478	0	1	0	2	1	0	0	0
ENSG00000215160.3	OR7E122P	1.42543	-2.27152	1.02802	0.32167	0.543014	0	2	0	1	0	0	1	0
ENSG00000162398.12	LEXM	1.42543	-2.27124	1.00667	0.326633	0.548113	0	2	0	1	0	0	1	0
ENSG00000269846.1	RP4-621N11.2	1.4254	-2.27148	1.27875	0.270335	0.492766	0	1	0	2	1	0	0	0
ENSG00000201229.1	SNORA63D	1.42538	-2.36766	1.34538	0.258547	0.480007	1	1	0	1	1	0	0	0
ENSG00000249131.2	PSD2-AS1	1.42538	-2.36766	1.34538	0.258547	0.480007	1	1	0	1	1	0	0	0
ENSG00000287401.1	RP11-67M24.7	1.42538	-2.36765	1.34408	0.258771	0.480295	1	1	0	1	1	0	0	0
ENSG00000216921.9	FAM240C	1.42537	-2.22569	1.12249	0.300901	0.522351	0	1	0	2	1	0	0	0
ENSG00000235347.1	RP1-37M3.8	1.42534	-2.31879	1.22056	0.281213	0.503419	1	1	0	1	1	0	0	0
ENSG00000255776.1	VDAC2P2	1.42534	-2.31876	1.21782	0.281739	0.503914	1	1	0	1	1	0	0	0
ENSG00000275881.1	Metazoa_SRP	1.42531	-2.27149	1.27982	0.27014	0.492645	1	1	0	1	1	0	0	0
ENSG00000179855.9	GIPC3	1.42528	-2.22558	1.36913	0.254509	0.475516	1	1	0	1	1	0	0	0
ENSG00000198670.12	LPA	1.42528	-2.36766	1.20875	0.28349	0.50547	2	1	0	0	1	0	0	0
ENSG00000233251.8	AC007743.1	1.42528	-2.36766	1.20875	0.28349	0.50547	2	1	0	0	1	0	0	0
ENSG00000253528.2	RP11-347C18.4	1.42528	-2.36765	1.2077	0.283695	0.505606	2	1	0	0	1	0	0	0
ENSG00000244734.4	HBB	1.42524	-2.31866	1.20621	0.283985	0.505823	2	1	0	0	1	0	0	0
ENSG00000287629.1	RP4-613B23.8	1.42519	-2.05527	1.09236	0.307321	0.528787	1	1	0	1	1	0	0	0
ENSG00000249483.1	CTD-2249K22.1	1.42508	-2.36771	1.35139	0.257517	0.479212	0	1	1	1	0	0	1	0
ENSG00000186439.14	TRDN	1.42499	-2.27141	1.1475	0.295709	0.51733	0	0	1	2	1	0	0	0
ENSG00000183239.5	RP5-1120P11.4	1.42498	-2.41832	1.32245	0.264456	0.486542	1	1	1	0	0	0	1	0
ENSG00000254944.1	ATP5PBP5	1.42498	-2.3677	1.35008	0.257742	0.479348	1	1	1	0	0	0	1	0
ENSG00000165805.10	C12orf50	1.42496	-2.22559	1.22778	0.279832	0.502136	0	0	1	2	1	0	0	0
ENSG00000260059.1	RP11-231E19.1	1.42495	-2.36767	1.34715	0.258243	0.479797	1	0	1	1	1	0	0	0
ENSG00000126856.16	PRDM7	1.42495	-2.36766	1.34539	0.258546	0.480007	1	0	1	1	1	0	0	0
ENSG00000250041.3	CTD-2003C8.2	1.42495	-2.31883	1.36448	0.255292	0.476424	1	1	1	0	0	0	1	0
ENSG00000237125.11	HAND2-AS1	1.42495	-2.31881	1.22269	0.280804	0.503031	1	1	1	0	0	0	1	0
ENSG00000236854.2	LINC00486	1.42494	-2.31873	1.35118	0.257554	0.479212	1	1	1	0	0	0	1	0
ENSG00000226010.1	RP11-403E24.1	1.42492	-2.31878	1.35836	0.256329	0.477716	1	0	1	1	1	0	0	0
ENSG00000100079.7	LGALS2	1.42489	-2.27147	1.27767	0.270532	0.492973	1	0	1	1	1	0	0	0
ENSG00000228238.1	GS1-304P7.2	1.42482	-2.31868	1.20715	0.283801	0.505666	2	0	1	0	1	0	0	0
ENSG00000260573.4	RP11-21B23.3	1.42479	-2.27151	1.15662	0.293847	0.515535	2	0	1	0	1	0	0	0
ENSG00000104313.20	EYA1	1.42474	1.37731	38.6568	2.97124e-06	7.47808e-05	35	41	54	33	22	20	17	13
ENSG00000259280.1	RP11-122D10.1	1.42462	-2.31881	1.22163	0.281007	0.503149	0	0	2	1	0	0	1	0
ENSG00000282787.1	RP11-151A10.3	1.42459	-2.27153	1.28414	0.269355	0.49209	0	0	2	1	0	0	1	0
ENSG00000233542.2	RP11-547D24.1	1.42459	-2.27143	1.27146	0.271666	0.493995	0	0	2	1	0	0	1	0
ENSG00000223715.3	LINC01208	1.42459	-2.27134	1.14046	0.297158	0.518806	0	0	2	1	0	0	1	0
ENSG00000275756.1	RP11-100G15.12	1.42456	-2.3677	1.21244	0.282776	0.504651	1	0	2	0	0	0	1	0
ENSG00000163735.7	CXCL5	1.42453	-2.31883	1.22403	0.280548	0.502822	1	0	2	0	0	0	1	0
ENSG00000249772.1	CTD-2193P3.2	1.42357	-2.36758	1.19756	0.285673	0.507826	0	2	0	1	1	0	0	0
ENSG00000232912.6	RERE-AS1	1.42338	-2.18117	1.20604	0.284018	0.505823	1	2	0	0	1	0	0	0
ENSG00000270104.1	RP11-245P10.6	1.42335	-2.0964	1.32322	0.262391	0.48461	1	2	0	0	1	0	0	0
ENSG00000279330.1	AJ003147.11	1.42319	-1.34177	3.88129	0.0615703	0.177578	7	4	5	3	1	5	1	1
ENSG00000287611.1	RP11-178F10.5	1.42317	-2.36774	1.21481	0.282319	0.504292	0	2	1	0	0	0	1	0
ENSG00000261701.8	HPR	1.42317	-2.36763	1.20227	0.284751	0.506656	0	2	1	0	0	0	1	0
ENSG00000226443.3	GAPDHP32	1.42312	-2.31879	1.35721	0.256525	0.477823	0	1	1	1	1	0	0	0
ENSG00000285701.1	RP11-84A14.8	1.42312	-2.31879	1.35721	0.256525	0.477823	0	1	1	1	1	0	0	0
ENSG00000152689.18	RASGRP3	1.4231	-2.27142	1.42039	0.246065	0.465035	0	1	1	1	1	0	0	0
ENSG00000214354.3	PAFAH1B1P1	1.42308	-2.22572	1.3834	0.25212	0.472511	0	1	1	1	1	0	0	0
ENSG00000163993.7	S100P	1.42305	-2.41829	1.31627	0.265539	0.487529	1	1	1	0	1	0	0	0
ENSG00000224965.1	LINC02586	1.42305	-2.41829	1.31627	0.265539	0.487529	1	1	1	0	1	0	0	0
ENSG00000229236.3	TTTY10	1.42305	-2.41829	1.31627	0.265539	0.487529	1	1	1	0	1	0	0	0
ENSG00000267026.5	RP11-92C4.3	1.42305	-2.41829	1.31627	0.265539	0.487529	1	1	1	0	1	0	0	0
ENSG00000276800.1	Metazoa_SRP	1.42305	-2.41829	1.31627	0.265539	0.487529	1	1	1	0	1	0	0	0
ENSG00000287624.1	RP11-66D17.15	1.42305	-2.41829	1.31627	0.265539	0.487529	1	1	1	0	1	0	0	0
ENSG00000257645.1	RP11-804F13.2	1.423	-2.27151	1.43312	0.244024	0.462361	1	1	1	0	1	0	0	0
ENSG00000271830.1	RP11-1C8.7	1.423	-2.2715	1.27762	0.27054	0.492973	1	1	1	0	1	0	0	0
ENSG00000212710.5	CTAGE1	1.423	-2.27141	1.41909	0.246274	0.465209	1	1	1	0	1	0	0	0
ENSG00000254440.3	PBOV1	1.42272	-2.36768	1.2074	0.283754	0.505666	0	0	2	1	1	0	0	0
ENSG00000133328.4	PLAAT2	1.42272	-2.36759	1.19744	0.285696	0.507833	0	0	2	1	1	0	0	0
ENSG00000288074.1	RP11-416B23.2	1.42268	-2.27153	1.1563	0.293911	0.515551	0	0	2	1	1	0	0	0
ENSG00000225527.1	RP11-383B4.4	1.42268	-2.27142	1.26854	0.272203	0.494223	0	0	2	1	1	0	0	0
ENSG00000238161.1	OR7E117P	1.42267	-2.22577	0.962658	0.337208	0.559554	0	0	2	1	1	0	0	0
ENSG00000134533.6	RERG	1.42265	-2.09648	1.26336	0.273156	0.495241	0	1	2	0	0	0	1	0
ENSG00000285846.1	RP11-348J12.6	1.42246	-0.44157	5.91726	0.0236019	0.0872737	9	8	18	2	3	3	3	7
ENSG00000164411.12	GJB7	1.42229	-2.27158	1.02909	0.321423	0.54283	0	0	3	0	0	0	1	0
ENSG00000258667.2	HIF1A-AS3	1.42172	-0.281871	8.1983	0.00904668	0.0417151	11	8	16	6	7	1	4	6
ENSG00000276863.1	CTD-2047H16.5	1.42124	-2.3677	1.2083	0.283578	0.505531	0	2	1	0	1	0	0	0
ENSG00000232032.1	AC079781.7	1.42124	-2.36769	1.20724	0.283783	0.505666	0	2	1	0	1	0	0	0
ENSG00000152192.8	POU4F1	1.42121	2.27764	43.0161	1.36355e-06	4.21315e-05	67	66	80	82	30	29	51	22
ENSG00000145491.12	ROPN1L	1.42119	-2.1813	1.17914	0.289312	0.511309	0	2	1	0	1	0	0	0
ENSG00000260101.1	RP11-568N6.1	1.42119	-0.60929	9.05226	0.00647298	0.0319609	9	9	8	6	3	3	6	2
ENSG00000285706.1	RP11-105G5.2	1.42039	-2.31872	1.06407	0.313519	0.535161	0	0	3	0	1	0	0	0
ENSG00000272033.1	RP11-52A20.2	1.42014	-0.748517	4.18469	0.0529568	0.159325	3	10	6	9	0	5	3	4
ENSG00000231345.3	BEND3P1	1.41924	-1.52485	3.12207	0.0911398	0.237569	4	0	5	5	1	0	4	1
ENSG00000225449.3	RAB6C-AS1	1.41795	-0.595015	8.21908	0.00897199	0.0414674	9	3	10	12	4	1	6	4
ENSG00000248751.6	RP1-130H16.18	1.41716	-0.653965	3.25351	0.0850125	0.225754	7	19	4	11	0	4	9	5
ENSG00000224577.3	LINC01117	1.41711	-2.31862	1.052	0.316216	0.537514	0	0	0	3	0	0	0	1
ENSG00000253558.1	CTD-2179L22.1	1.41701	-2.3186	1.07963	0.31009	0.531437	1	0	0	2	0	0	0	1
ENSG00000262140.1	RP11-417N10.3	1.41701	-2.31861	1.18948	0.28726	0.509544	1	0	0	2	0	0	0	1
ENSG00000275115.1	RP11-613H2.3	1.4169	-2.36752	1.18301	0.288541	0.510726	2	0	0	1	0	0	0	1
ENSG00000164023.14	SGMS2	1.41689	-0.510206	7.40878	0.0124648	0.0535351	13	8	11	2	6	1	5	3
ENSG00000279262.1	CTD-3137H5.5	1.41682	-2.31852	1.04368	0.318095	0.539446	3	0	0	0	0	0	0	1
ENSG00000260796.1	RP11-1348G14.5	1.41682	-2.31863	1.0527	0.316058	0.537342	3	0	0	0	0	0	0	1
ENSG00000235493.2	LINC01967	1.41675	-1.67054	2.60598	0.120744	0.288789	0	3	6	3	0	1	2	2
ENSG00000271156.1	RP11-642C5.1	1.41587	-1.44396	4.50676	0.0452776	0.142237	3	3	4	4	2	0	3	1
ENSG00000103175.11	WFDC1	1.4157	-1.46975	2.68342	0.115653	0.280077	3	2	2	5	0	1	1	3
ENSG00000287245.1	RP11-361A21.4	1.41527	-2.18088	1.03268	0.320599	0.542132	0	1	0	2	0	0	0	1
ENSG00000232684.1	ATP11A-AS1	1.41519	-2.36743	1.17079	0.290982	0.512556	0	1	0	2	0	0	0	1
ENSG00000264272.1	CTD-2514K5.4	1.41514	-1.31759	1.77487	0.196446	0.400194	2	16	0	1	2	6	0	0
ENSG00000112273.7	HDGFL1	1.41514	-2.27115	1.22651	0.280074	0.502453	1	1	0	1	0	0	0	1
ENSG00000228031.4	AC078842.3	1.41512	-2.31865	1.32592	0.26192	0.484127	1	1	0	1	0	0	0	1
ENSG00000248909.1	HMGB1P21	1.41512	-2.31866	1.19289	0.286589	0.508888	1	1	0	1	0	0	0	1
ENSG00000203740.4	METTL11B	1.41509	-2.36752	1.31206	0.264356	0.486503	1	1	0	1	0	0	0	1
ENSG00000270806.2	C17orf50	1.41509	-2.36752	1.31206	0.264356	0.486503	1	1	0	1	0	0	0	1
ENSG00000259090.1	SEPTIN7P1	1.41509	-2.36754	1.31502	0.263834	0.486203	1	1	0	1	0	0	0	1
ENSG00000230371.1	KARS1P2	1.41509	-2.41814	1.2823	0.271596	0.493932	1	1	0	1	0	0	0	1
ENSG00000287615.1	RP11-115G12.1	1.41506	-2.22553	0.938605	0.34319	0.565852	2	1	0	0	0	0	0	1
ENSG00000103832.10	GOLGA8UP	1.41504	-2.27117	1.11254	0.303	0.524328	2	1	0	0	0	0	0	1
ENSG00000224709.2	OR11M1P	1.41499	-2.36752	1.18037	0.289067	0.511227	2	1	0	0	0	0	0	1
ENSG00000236289.4	GACAT3	1.41488	-1.73327	2.40557	0.135202	0.311989	4	7	1	0	1	2	1	1
ENSG00000251429.1	AIDAP2	1.41486	-2.18099	1.17639	0.289861	0.511654	0	0	1	2	0	0	0	1
ENSG00000184599.14	TAFA3	1.41486	-2.18108	1.18414	0.288317	0.510511	0	0	1	2	0	0	0	1
ENSG00000111199.12	TRPV4	1.41482	-2.01582	1.41038	0.247684	0.467044	1	0	1	1	0	0	0	1
ENSG00000259686.1	HNRNPA1P71	1.41482	-2.27126	1.23839	0.277819	0.499961	0	0	1	2	0	0	0	1
ENSG00000254607.2	RP11-115C10.1	1.41479	-2.31854	1.17897	0.289345	0.511309	0	0	1	2	0	0	0	1
ENSG00000213943.3	KRT18P17	1.41477	-2.36753	1.18135	0.288873	0.511048	0	0	1	2	0	0	0	1
ENSG00000179101.5	H3P47	1.4147	-2.31856	1.3132	0.264154	0.486503	1	0	1	1	0	0	0	1
ENSG00000287983.1	RP4-705O1.2	1.4146	-2.31855	1.17992	0.289157	0.511227	2	0	1	0	0	0	0	1
ENSG00000226765.1	RPSAP33	1.41457	-2.36753	1.1803	0.28908	0.511227	2	0	1	0	0	0	0	1
ENSG00000226367.6	ST7-AS2	1.41389	-2.13796	1.10801	0.303963	0.525458	0	0	0	3	0	1	0	0
ENSG00000217783.2	LDHAL6FP	1.41382	-2.09623	0.985286	0.331713	0.553357	1	0	0	2	0	1	0	0
ENSG00000256481.1	RP11-21A7A.4	1.41372	-2.271	0.976182	0.333909	0.555979	1	0	0	2	0	1	0	0
ENSG00000250640.2	OR7E41P	1.41356	-2.36746	1.17156	0.290827	0.512465	2	0	0	1	0	1	0	0
ENSG00000256789.1	RP11-697H9.2	1.41356	-2.36746	1.17156	0.290827	0.512465	2	0	0	1	0	1	0	0
ENSG00000161281.11	COX7A1	1.41353	-2.27128	0.996042	0.329145	0.55043	3	0	0	0	0	1	0	0
ENSG00000248854.1	HNRNPH1P3	1.41342	-2.13804	1.14893	0.295416	0.517016	0	2	0	1	0	0	0	1
ENSG00000254532.2	RP11-624D11.2	1.4134	-2.18121	1.19535	0.286106	0.508431	0	2	0	1	0	0	0	1
ENSG00000232034.1	AC092168.2	1.41328	-2.36756	1.18254	0.288635	0.510766	0	2	0	1	0	0	0	1
ENSG00000249222.1	ATP5MGL	1.41328	-2.2256	1.06764	0.312728	0.534404	1	2	0	0	0	0	0	1
ENSG00000236148.5	RPL23AP37	1.41318	-2.36757	1.18253	0.288637	0.510766	1	2	0	0	0	0	0	1
ENSG00000136750.13	GAD2	1.41301	-2.13814	1.28405	0.269372	0.49209	0	1	1	1	0	0	0	1
ENSG00000260871.1	CTD-2373J6.1	1.41299	-2.18122	1.33099	0.261036	0.483032	0	1	1	1	0	0	0	1
ENSG00000232362.1	ATP5MGP2	1.41293	-2.27128	1.23794	0.277905	0.500052	0	1	1	1	0	0	0	1
ENSG00000253915.1	MAPRE1P1	1.41293	-2.27131	1.24067	0.27739	0.499547	0	1	1	1	0	0	0	1
ENSG00000270140.1	RP5-1021I20.6	1.4129	-2.31868	1.32598	0.261908	0.484127	0	1	1	1	0	0	0	1
ENSG00000243508.1	DNAJB6P7	1.41286	-2.36755	1.31207	0.264355	0.486503	0	1	1	1	0	0	0	1
ENSG00000257354.2	RP11-631N16.2	1.41283	4.99914	224.576	5.19166e-13	7.18655e-09	496	444	486	536	208	186	287	202
ENSG00000271236.1	SUMO2P15	1.4128	-2.31869	1.19263	0.286641	0.508924	1	1	1	0	0	0	0	1
ENSG00000182545.6	RNASE10	1.41276	-2.36755	1.31207	0.264354	0.486503	1	1	1	0	0	0	0	1
ENSG00000258745.1	RP11-218E20.5	1.41276	-2.36755	1.31207	0.264354	0.486503	1	1	1	0	0	0	0	1
ENSG00000164107.9	HAND2	1.41254	-2.22538	1.0798	0.310052	0.531409	0	0	2	1	0	0	0	1
ENSG00000255138.1	GLTPP1	1.41252	-1.47013	3.51652	0.0741243	0.203942	4	4	4	2	4	0	1	1
ENSG00000279985.1	CTC-436P18.4	1.41242	-2.27129	1.11965	0.3015	0.522898	1	0	2	0	0	0	0	1
ENSG00000241991.1	RP11-95I19.2	1.41234	-2.36757	1.18241	0.288662	0.510776	1	0	2	0	0	0	0	1
ENSG00000261793.1	RP11-350O14.18	1.41189	-2.3185	1.17096	0.290947	0.512543	0	1	0	2	0	1	0	0
ENSG00000235262.1	KDM5C-IT1	1.4118	-2.31859	1.31233	0.264308	0.486503	1	1	0	1	0	1	0	0
ENSG00000230226.1	RP4-697K14.3	1.41175	-2.4181	1.2712	0.273614	0.495526	1	1	0	1	0	1	0	0
ENSG00000253832.1	CTD-2168K21.1	1.41165	-2.36748	1.1713	0.29088	0.512507	2	1	0	0	0	1	0	0
ENSG00000241525.4	AC108004.3	1.41162	-2.13813	1.00616	0.326753	0.548151	0	0	1	2	0	1	0	0
ENSG00000254694.1	RP11-50B3.4	1.41152	-2.13781	1.24522	0.276534	0.498589	1	0	1	1	0	1	0	0
ENSG00000264932.3	CTD-2104P17.2	1.41151	-2.27134	1.12268	0.300863	0.522316	0	0	1	2	0	1	0	0
ENSG00000231416.1	RP11-422P24.9	1.41147	-2.31859	1.18007	0.289127	0.511227	0	0	1	2	0	1	0	0
ENSG00000259267.3	LINC02622	1.41146	-2.22554	1.16577	0.291992	0.513648	1	0	1	1	0	1	0	0
ENSG00000182574.8	CSGALNACT2P1	1.41143	-2.36751	1.17362	0.290414	0.512084	0	0	1	2	0	1	0	0
ENSG00000188393.9	CLEC2A	1.41142	-2.27112	1.2179	0.281723	0.503914	1	0	1	1	0	1	0	0
ENSG00000283755.2	CPHXL	1.41133	-2.4181	1.27127	0.273601	0.495526	1	0	1	1	0	1	0	0
ENSG00000213432.2	RPL17P34	1.41128	-2.31841	1.05618	0.31528	0.536512	2	0	1	0	0	1	0	0
ENSG00000280710.3	RP11-214F16.8	1.41123	-2.3675	1.17224	0.290691	0.512402	2	0	1	0	0	1	0	0
ENSG00000284987.1	U52112.13	1.41123	-2.36751	1.1736	0.290419	0.512084	2	0	1	0	0	1	0	0
ENSG00000242412.1	DBIL5P2	1.411	-2.31869	1.19011	0.287137	0.509525	0	2	1	0	0	0	0	1
ENSG00000168959.15	GRM5	1.41063	-2.27132	1.23917	0.277672	0.499795	0	1	2	0	0	0	0	1
ENSG00000262768.2	RP11-353N14.1	1.41054	-2.36758	1.1808	0.288982	0.511146	0	1	2	0	0	0	0	1
ENSG00000250267.2	RP11-122A21.2	1.41021	-2.27142	1.00272	0.327564	0.548748	0	0	3	0	0	0	0	1
ENSG00000187862.13	TTC24	1.41009	-2.22547	1.19398	0.286374	0.508782	0	2	0	1	0	1	0	0
ENSG00000243305.1	RP11-362A9.3	1.41004	-2.27105	0.975165	0.334155	0.556275	0	2	0	1	0	1	0	0
ENSG00000234147.2	RP11-515I12.1	1.41003	-2.18105	1.17497	0.290144	0.511829	1	2	0	0	0	1	0	0
ENSG00000276368.2	H2AC14	1.40967	-2.22536	1.31555	0.26374	0.486127	0	1	1	1	0	1	0	0
ENSG00000140285.12	FGF7	1.40967	-2.22543	1.32463	0.262145	0.484354	0	1	1	1	0	1	0	0
ENSG00000279221.1	RP11-543H23.1	1.40952	-2.36752	1.30266	0.266026	0.487987	0	1	1	1	0	1	0	0
ENSG00000282418.1	RP11-496N12.9	1.40948	-2.31854	1.3026	0.266035	0.487987	1	1	1	0	0	1	0	0
ENSG00000249774.1	CTD-2206G10.2	1.40942	-2.36751	1.30141	0.266248	0.488169	1	1	1	0	0	1	0	0
ENSG00000250748.6	RP11-230G5.2	1.40942	-2.41813	1.27164	0.273533	0.495526	1	1	1	0	0	1	0	0
ENSG00000285700.1	CTD-2536I1.4	1.40942	-2.41813	1.27164	0.273533	0.495526	1	1	1	0	0	1	0	0
ENSG00000196350.9	ZNF729	1.4092	-1.07601	3.36164	0.0803266	0.216159	2	3	6	3	4	0	1	1
ENSG00000141194.7	OR4D1	1.409	-2.36751	1.17092	0.290956	0.512543	1	0	2	0	0	1	0	0
ENSG00000267526.1	RP11-178C3.6	1.409	-2.36751	1.17092	0.290956	0.512543	1	0	2	0	0	1	0	0
ENSG00000246363.3	LINC02458	1.4081	-2.31865	1.04381	0.318064	0.539446	0	3	0	0	0	1	0	0
ENSG00000248744.1	RP11-362I1.1	1.4078	-2.22547	1.19044	0.287072	0.509494	0	2	1	0	0	1	0	0
ENSG00000160588.10	MPZL3	1.40757	-1.34244	3.31041	0.0825083	0.2207	3	5	1	5	4	0	0	2
ENSG00000258819.2	LINC02289	1.40755	-1.03472	7.65784	0.0112526	0.0494566	5	8	4	6	2	3	3	2
ENSG00000268278.1	RP11-420K14.1	1.40738	-2.2256	1.06052	0.31431	0.535883	0	1	2	0	0	1	0	0
ENSG00000287185.1	RP11-69M11.1	1.40733	-2.2714	0.997495	0.3288	0.550086	0	1	2	0	0	1	0	0
ENSG00000227467.3	LINC01537	1.40719	-2.36754	1.17169	0.290802	0.512465	0	1	2	0	0	1	0	0
ENSG00000262454.4	MIR193BHG	1.40536	-1.55269	2.89138	0.10318	0.25898	4	6	4	0	2	0	2	2
ENSG00000278058.1	RP11-70D24.2	1.40536	-0.566218	8.30947	0.00865502	0.0402713	12	11	10	3	4	3	7	2
ENSG00000248360.7	LINC00504	1.40489	-1.61058	2.6856	0.115513	0.279911	3	6	3	2	0	2	4	0
ENSG00000116016.14	EPAS1	1.40188	-0.125791	7.83615	0.010465	0.046752	26	9	6	6	7	4	5	5
ENSG00000262456.1	RP1-59D14.1	1.40061	0.796913	7.7619	0.0107853	0.0477617	14	29	41	11	0	18	15	9
ENSG00000254692.1	RP11-468E2.1	1.39904	2.93295	3.96895	0.0589275	0.172526	69	114	202	158	0	166	73	0
ENSG00000174564.13	IL20RB	1.39672	0.773218	18.3159	0.000305922	0.00272242	27	12	29	23	9	12	14	6
ENSG00000269421.1	ZNF92P3	1.39462	-1.64013	2.05837	0.165465	0.357967	1	0	8	5	0	3	3	0
ENSG00000263142.5	LRRC37A17P	1.39438	-1.01512	3.22314	0.0863845	0.228376	3	15	5	0	4	3	0	3
ENSG00000204086.4	RPA4	1.39015	-0.884757	6.69194	0.016844	0.0676267	9	4	6	8	5	3	2	2
ENSG00000126353.3	CCR7	1.3887	0.622524	13.6216	0.00128186	0.00869699	21	19	23	16	8	1	15	12
ENSG00000279391.1	RP11-236J17.7	1.3875	-1.49705	2.45717	0.131291	0.306192	2	7	2	3	0	3	2	1
ENSG00000287031.1	RP11-810C16.2	1.38417	-1.4175	4.06109	0.0562885	0.166615	4	4	2	6	1	3	3	0
ENSG00000265791.1	CTD-2349P21.10	1.38345	-1.39211	2.80884	0.107932	0.266794	7	4	1	6	6	0	0	2
ENSG00000187098.17	MITF	1.38298	0.134012	11.7673	0.00239685	0.0143289	9	15	18	13	13	5	5	2
ENSG00000271784.1	TP53RK-DT	1.37995	-1.55222	3.10157	0.0921412	0.239614	2	5	4	3	1	2	0	3
ENSG00000175305.18	CCNE2	1.37747	2.86863	83.6272	6.09911e-09	1.26777e-06	100	133	109	136	50	55	62	52
ENSG00000231464.1	AC024937.4	1.37592	-1.29405	3.56824	0.0721772	0.199783	6	5	3	2	0	3	3	1
ENSG00000250081.1	CTD-2116N20.1	1.37503	-2.0962	1.26532	0.272795	0.494763	1	0	0	4	0	0	2	0
ENSG00000286328.1	RP11-142I20.2	1.37332	-2.22563	1.43275	0.244083	0.462425	3	1	0	1	0	0	2	0
ENSG00000214955.5	AP000318.2	1.37325	-2.22558	1.42768	0.244893	0.463549	3	0	0	2	1	0	1	0
ENSG00000232739.1	RP11-25G10.2	1.37291	-2.09629	1.20917	0.28341	0.505444	5	0	0	0	1	0	1	0
ENSG00000213305.3	HNRNPCP6	1.3718	-2.22551	1.35377	0.257111	0.478594	0	1	0	4	1	0	1	0
ENSG00000260685.1	RP11-326L17.1	1.37169	-2.22566	1.47696	0.23716	0.454411	2	2	0	1	0	0	2	0
ENSG00000279891.1	FLJ42393	1.37153	-2.13812	1.19952	0.285288	0.507367	1	0	0	4	2	0	0	0
ENSG00000229326.3	RPL17P15	1.37153	-2.22551	1.56235	0.224483	0.438362	3	1	0	1	1	0	1	0
ENSG00000162194.12	LBHD1	1.37153	0.736625	10.7445	0.00344448	0.0191872	32	21	34	20	9	3	30	8
ENSG00000286271.2	CTD-2201E18.6	1.37105	-2.13818	1.67085	0.209585	0.418822	3	0	1	1	1	0	1	0
ENSG00000225014.1	KCTD9P1	1.37072	-1.22502	4.71208	0.0410425	0.132447	5	8	3	2	2	2	3	1
ENSG00000247627.2	MTND4P12	1.37047	-1.20245	5.0773	0.0345675	0.116665	8	4	2	4	2	1	2	3
ENSG00000172995.17	ARPP21	1.37012	-1.79922	1.66452	0.210419	0.420124	1	0	2	2	0	0	2	0
ENSG00000139515.6	PDX1	1.36981	-2.05569	1.83706	0.189078	0.390323	1	2	0	2	1	0	1	0
ENSG00000164265.9	SCGB3A2	1.36978	-2.18101	1.32133	0.262723	0.484965	2	1	0	2	2	0	0	0
ENSG00000279311.1	RP11-170K4.2	1.36948	-2.09632	1.86576	0.185793	0.386075	1	1	1	2	1	0	1	0
ENSG00000226702.1	MIR217HG	1.369	-1.52438	3.23734	0.0857396	0.227136	5	5	4	2	0	2	2	3
ENSG00000230825.2	AC005532.5	1.36888	-2.18129	1.31187	0.26439	0.486503	1	0	3	1	0	0	2	0
ENSG00000279469.1	RP11-215P8.2	1.36885	-2.05584	1.31865	0.263194	0.485542	0	0	3	2	0	0	2	0
ENSG00000224452.1	RSL24D1P6	1.36872	-1.49669	3.35454	0.080625	0.216751	3	1	5	7	1	3	1	2
ENSG00000260316.2	LA16c-306A4.2	1.36824	-2.09622	1.43466	0.243778	0.462007	0	3	0	2	1	0	1	0
ENSG00000250347.1	AC005740.4	1.36814	-2.18118	1.42336	0.245586	0.464353	2	3	0	0	1	0	1	0
ENSG00000285492.1	RP1-111C20.3	1.3677	-1.86796	1.38699	0.251524	0.471747	0	2	1	2	1	0	1	0
ENSG00000286230.1	CTD-2587H24.15	1.36762	-2.0961	1.42101	0.245964	0.46494	2	1	1	1	2	0	0	0
ENSG00000245025.3	RP11-875O11.1	1.36738	0.324732	11.4935	0.00263784	0.0154689	18	21	26	16	13	4	4	16
ENSG00000125810.10	CD93	1.36731	-2.09641	1.50017	0.233626	0.449974	2	1	2	0	1	0	1	0
ENSG00000251273.4	LINC02228	1.36667	-1.39179	3.93053	0.0600695	0.174632	2	2	7	5	2	2	0	3
ENSG00000259138.1	RP11-950C14.7	1.36653	-2.09631	1.22982	0.279443	0.501711	0	4	0	1	1	0	1	0
ENSG00000268941.2	LINC01711	1.36605	-2.27142	1.40533	0.250484	0.47037	2	2	1	0	2	0	0	0
ENSG00000147481.17	SNTG1	1.36601	-2.22564	1.46392	0.239175	0.456719	2	2	1	0	2	0	0	0
ENSG00000255008.3	LINC02739	1.36597	-2.05558	1.61234	0.217458	0.429471	1	2	1	1	2	0	0	0
ENSG00000185267.10	CDNF	1.36579	0.177863	12.4624	0.00188708	0.0118199	10	10	24	11	7	9	5	4
ENSG00000250202.2	RP11-397E7.2	1.36577	-2.18127	1.47402	0.237613	0.454837	0	1	2	2	2	0	0	0
ENSG00000134242.16	PTPN22	1.36513	-2.13827	1.08653	0.308586	0.53014	0	1	4	0	0	0	2	0
ENSG00000138061.12	CYP1B1	1.365	-0.115595	8.0372	0.00964948	0.0438418	17	9	22	6	9	2	10	4
ENSG00000198626.17	RYR2	1.36459	-1.18026	5.98332	0.0229207	0.0855549	5	4	6	3	2	2	2	2
ENSG00000250155.2	CTD-2353F22.1	1.36409	-2.22567	1.46313	0.239298	0.456799	0	2	2	1	2	0	0	0
ENSG00000228430.9	RP11-15B24.5	1.36395	-2.13794	1.21873	0.281564	0.503754	1	2	2	0	2	0	0	0
ENSG00000229057.1	RPS3AP54	1.3639	-2.18108	1.08873	0.308107	0.52958	0	0	0	5	0	0	1	1
ENSG00000224751.2	SHMT1P1	1.36383	-2.22545	1.33489	0.260358	0.482174	1	0	0	4	0	0	1	1
ENSG00000254902.1	ANO1-AS1	1.3637	-2.13804	1.33858	0.259719	0.48142	2	0	0	3	0	0	1	1
ENSG00000285018.1	CH17-343M10.2	1.36364	-2.18107	1.40426	0.248682	0.468288	3	0	0	2	0	0	1	1
ENSG00000225342.2	LRRK2-DT	1.36322	-2.18128	1.24895	0.275835	0.497815	1	0	4	0	2	0	0	0
ENSG00000237749.4	RP3-423B22.5	1.36316	-2.05563	1.23849	0.2778	0.49996	1	0	4	0	2	0	0	0
ENSG00000287559.1	RP1-259A10.2	1.36201	-2.181	1.58747	0.220918	0.433612	2	1	0	2	0	0	1	1
ENSG00000260343.1	LINC01043	1.36148	-1.94021	1.5057	0.232793	0.448999	3	0	1	1	0	0	1	1
ENSG00000237263.1	MAPK6P3	1.36063	-1.8679	1.38867	0.251246	0.471314	1	0	0	4	0	1	1	0
ENSG00000138378.19	STAT4	1.36054	-0.114804	15.8044	0.000642425	0.00494454	11	11	15	13	7	5	7	4
ENSG00000232587.1	EEF1A1P3	1.36028	-2.13807	1.68814	0.207327	0.415416	2	2	0	1	0	0	1	1
ENSG00000258896.1	SCOCP1	1.36023	-2.27124	1.53884	0.229927	0.445394	2	1	0	2	1	0	0	1
ENSG00000272434.1	RP13-131K19.6	1.35999	-2.05561	1.15507	0.294162	0.515924	0	0	1	4	1	0	0	1
ENSG00000216657.1	GLRX3P2	1.35999	0.144039	15.5659	0.000691271	0.00523464	20	16	14	13	9	4	6	10
ENSG00000255409.1	RSF1-IT1	1.35993	-2.22536	1.51965	0.230711	0.446317	1	0	1	3	1	0	0	1
ENSG00000204025.8	TRPC5OS	1.35989	-2.05565	1.8064	0.192668	0.395404	2	1	1	1	0	0	1	1
ENSG00000254968.7	LINC02763	1.35985	-2.27129	1.4903	0.237141	0.454405	3	1	1	0	0	0	1	1
ENSG00000287219.1	RP3-508I15.23	1.35984	-2.22546	1.58441	0.221348	0.434057	2	0	1	2	1	0	0	1
ENSG00000226890.1	LA16c-395F10.1	1.35888	-2.22545	1.58054	0.221894	0.43485	2	1	0	2	0	1	1	0
ENSG00000183671.12	GPR1	1.35855	0.0803706	12.0638	0.00216291	0.0131576	17	14	15	6	8	6	8	2
ENSG00000127588.5	GNG13	1.35803	-2.13786	1.43742	0.24334	0.461524	3	1	1	0	1	0	0	1
ENSG00000101000.6	PROCR	1.358	-2.09621	1.81736	0.191375	0.393605	0	1	2	2	0	0	1	1
ENSG00000223886.3	RP11-251G23.2	1.35783	-2.22548	1.58234	0.221641	0.434508	1	0	2	2	1	0	0	1
ENSG00000280344.1	AC009166.7	1.35783	-2.01592	1.76486	0.197665	0.401848	1	0	2	2	1	0	0	1
ENSG00000270052.1	WI2-80269A6.1	1.35774	-2.09624	1.41784	0.246475	0.46545	2	0	2	1	1	0	0	1
ENSG00000237978.6	KCNMB2-AS1	1.35766	-2.13797	1.45033	0.2413	0.458979	3	0	2	0	1	0	0	1
ENSG00000286393.1	RP1-29C18.11	1.35745	-2.18106	1.39012	0.251006	0.470997	2	0	3	0	0	0	1	1
ENSG00000271034.1	RP11-963H1.1	1.35697	-2.01597	1.34618	0.25841	0.479925	0	3	0	2	1	0	0	1
ENSG00000179342.4	GS1-124K5.9	1.35681	-1.94008	1.61571	0.216995	0.428955	1	0	1	3	1	1	0	0
ENSG00000228350.1	LINC02585	1.3567	-2.22548	1.52942	0.229267	0.444828	3	1	1	0	0	1	1	0
ENSG00000248483.7	POU5F2	1.35611	-2.22551	1.77481	0.196453	0.400194	1	1	2	1	1	0	0	1
ENSG00000287403.1	RP11-28G8.2	1.35603	-2.18113	1.59602	0.219721	0.432336	2	1	2	0	1	0	0	1
ENSG00000232396.2	RP1-76B20.11	1.35582	-2.22556	1.53845	0.227942	0.442868	1	1	3	0	0	0	1	1
ENSG00000258854.1	RP11-463J10.4	1.35565	-2.18103	1.38445	0.251946	0.47225	2	0	3	0	1	0	0	1
ENSG00000084110.11	HAL	1.35559	-1.83313	1.72674	0.202393	0.408282	1	3	0	1	0	1	1	0
ENSG00000253607.1	RP11-557C18.3	1.35547	-2.09619	1.40741	0.248168	0.46767	1	2	0	2	1	1	0	0
ENSG00000287011.1	GS1-34D21.1	1.35502	-2.05542	1.75385	0.199017	0.403617	2	1	1	1	1	1	0	0
ENSG00000240661.3	RP11-174O3.3	1.355	-2.13791	1.85856	0.18661	0.387322	2	1	1	1	1	1	0	0
ENSG00000265261.1	RP11-162A12.3	1.35454	-1.97762	1.50577	0.232783	0.448999	0	2	2	1	1	0	0	1
ENSG00000054219.11	LY75	1.35451	-2.13788	1.30482	0.26564	0.487585	0	0	3	2	0	1	1	0
ENSG00000267243.6	AC005307.4	1.3545	-2.27123	1.31765	0.265297	0.487505	3	0	2	0	1	1	0	0
ENSG00000165970.12	SLC6A5	1.35449	-2.18107	1.58221	0.221659	0.434513	0	2	2	1	1	0	0	1
ENSG00000230082.1	PRRT3-AS1	1.35449	-2.18114	1.59369	0.220046	0.43273	0	2	2	1	1	0	0	1
ENSG00000225393.1	RP11-218L14.4	1.35445	-2.01603	1.48347	0.236161	0.453281	1	0	3	1	0	1	1	0
ENSG00000180316.13	PNPLA1	1.35405	-2.09612	1.54455	0.227053	0.441756	1	1	3	0	1	0	0	1
ENSG00000249685.1	RP11-360F5.3	1.35384	-2.13802	1.31879	0.263169	0.485527	0	3	0	2	1	1	0	0
ENSG00000179477.11	ALOX12B	1.35348	-2.09623	1.45187	0.241057	0.458765	0	2	1	2	1	1	0	0
ENSG00000258033.1	SNX5P2	1.35295	0.0245499	14.6017	0.000934644	0.00672268	11	11	17	13	9	6	5	4
ENSG00000168404.13	MLKL	1.35137	-1.97759	1.72628	0.202452	0.40831	1	2	2	0	1	1	0	0
ENSG00000224765.1	RP1-137H15.2	1.3507	-2.01605	1.23316	0.278809	0.501092	0	0	4	1	1	1	0	0
ENSG00000261762.1	RP11-650L12.2	1.35069	1.32644	24.8206	5.53508e-05	0.000706495	30	44	38	38	21	13	18	18
ENSG00000244234.3	GMCL2	1.35069	-2.18095	1.25034	0.275575	0.49754	1	1	0	3	0	0	0	2
ENSG00000186652.10	PRG2	1.35019	-2.09583	1.21161	0.282938	0.504777	3	0	1	1	0	0	0	2
ENSG00000210144.1	MT-TY	1.34917	-2.18081	1.34867	0.257983	0.479574	2	0	0	3	0	1	0	1
ENSG00000262636.1	CTD-3088G3.4	1.34902	-2.22534	1.2409	0.277346	0.4995	0	2	0	3	0	0	0	2
ENSG00000276757.1	RN7SL192P	1.34897	-2.18096	1.40645	0.248324	0.467818	1	2	0	2	0	0	0	2
ENSG00000228208.7	LINC02869	1.34874	-1.97718	1.41946	0.246214	0.465189	1	1	1	2	0	0	0	2
ENSG00000213695.3	RPS7P14	1.34724	-1.97746	1.51799	0.230958	0.446607	2	0	1	2	0	1	0	1
ENSG00000234324.1	RPL9P2	1.34713	-2.01586	1.44802	0.241663	0.459444	3	0	1	1	0	1	0	1
ENSG00000274420.1	ENSG10010135797.1	1.3471	-2.05536	1.44642	0.241914	0.459671	3	0	1	1	0	1	0	1
ENSG00000278344.1	RP11-18C24.8	1.34655	-2.22538	1.39677	0.24991	0.469768	0	1	2	2	0	0	0	2
ENSG00000231829.4	RP11-310E22.7	1.34639	-1.97735	1.16679	0.291786	0.513385	0	0	3	2	0	0	0	2
ENSG00000122862.5	SRGN	1.34613	-2.181	1.36457	0.255277	0.476424	1	0	3	1	0	0	0	2
ENSG00000288032.1	RP11-704O17.1	1.3459	-2.09637	2.01895	0.169396	0.363883	1	3	1	2	1	0	2	0
ENSG00000267143.1	RP11-677O4.6	1.34578	-2.01597	1.62152	0.216199	0.427843	0	2	1	4	2	0	1	0
ENSG00000287414.1	RP11-215P9.1	1.34571	-1.8331	1.91201	0.180645	0.379826	3	3	0	1	2	0	1	0
ENSG00000287635.1	RP11-74A12.3	1.34558	-1.9399	1.70011	0.205781	0.413158	2	1	1	1	0	1	0	1
ENSG00000233578.1	EIF4EP1	1.34544	-1.22453	5.3247	0.0308357	0.107247	5	4	4	7	2	3	1	3
ENSG00000287961.1	CTD-2562J15.8	1.34536	-2.0961	1.52419	0.230038	0.445447	3	1	1	0	0	1	0	1
ENSG00000286080.1	CTC-559E9.14	1.34535	-2.05574	1.82488	0.190494	0.392398	3	2	2	0	1	0	2	0
ENSG00000285873.1	RP1-163O16.1	1.34517	-2.18093	1.35423	0.257033	0.47848	1	3	1	0	0	0	0	2
ENSG00000157554.19	ERG	1.34511	-2.05533	1.28969	0.268352	0.490935	2	0	2	1	0	1	0	1
ENSG00000267662.1	TSHZ3-AS1	1.3449	-2.18093	1.35506	0.256891	0.478312	3	0	2	0	0	1	0	1
ENSG00000287533.1	CTC-559E9.15	1.34484	-2.05571	1.53744	0.22809	0.443095	2	1	4	0	0	0	3	0
ENSG00000268240.1	RP11-678G14.4	1.34441	-2.18106	1.24939	0.275752	0.497753	1	1	3	0	0	0	0	2
ENSG00000272995.1	RP11-362J17.1	1.34414	-2.22532	1.34561	0.258508	0.480007	0	3	0	2	0	1	0	1
ENSG00000145113.22	MUC4	1.34414	-2.09624	1.98757	0.172606	0.368802	2	3	1	1	2	0	1	0
ENSG00000275714.2	H3C1	1.34407	-2.13788	1.28869	0.268533	0.491136	2	3	0	0	0	1	0	1
ENSG00000081148.12	IMPG2	1.34397	-1.97785	1.56963	0.223441	0.437022	1	4	2	0	0	0	3	0
ENSG00000234740.1	RP11-272P10.2	1.34386	-1.70168	1.7778	0.196091	0.399749	0	3	1	3	1	0	2	0
ENSG00000224505.2	AC002117.1	1.34383	-2.09614	1.5265	0.229697	0.445133	1	2	1	1	0	1	0	1
ENSG00000243307.2	POM121L6P	1.34281	-2.0963	1.52307	0.230205	0.445662	2	4	0	1	3	0	0	0
ENSG00000286299.1	RP1-167O5.3	1.34273	-2.13785	1.319	0.263132	0.4855	1	2	0	2	0	2	0	0
ENSG00000288393.1	ZNF75CP	1.34261	-2.22527	1.37637	0.253293	0.4741	1	2	0	2	0	2	0	0
ENSG00000225357.3	RPF2P1	1.34258	-0.815286	4.83447	0.0387315	0.126912	3	3	8	6	1	5	2	1
ENSG00000274515.1	CTD-2026K11.5	1.34211	-2.18098	1.49595	0.234263	0.450951	0	3	1	1	0	1	0	1
ENSG00000248599.2	FLJ42969	1.34204	-1.97763	1.60732	0.218151	0.430319	0	3	3	1	1	0	2	0
ENSG00000267541.1	MTCO2P2	1.34181	-1.93992	1.75191	0.199256	0.403925	1	1	0	5	0	0	2	1
ENSG00000234332.1	BCAS2P2	1.34176	-0.0951659	7.22312	0.0134628	0.0567649	9	14	10	22	12	3	9	2
ENSG00000115339.14	GALNT3	1.34133	-1.9403	1.63676	0.214128	0.425078	0	1	5	1	1	0	2	0
ENSG00000245768.7	RP11-410D17.2	1.34096	-2.18094	1.2326	0.278915	0.501186	1	3	0	1	0	2	0	0
ENSG00000122543.11	OCM	1.34014	-1.86773	1.59469	0.219907	0.432549	4	0	0	3	0	1	2	0
ENSG00000258626.2	COX7A2P1	1.33983	-2.18093	1.22966	0.279473	0.501722	1	0	3	1	0	2	0	0
ENSG00000244692.3	RN7SL724P	1.33962	-1.90339	1.82559	0.190411	0.392255	3	0	1	3	1	0	1	1
ENSG00000235268.2	KDM4E	1.33938	-2.09579	1.06004	0.314417	0.535934	1	4	0	0	0	2	0	0
ENSG00000213383.2	AC104297.1	1.33923	-0.9208	7.40114	0.0125042	0.0536628	6	6	7	11	4	1	6	3
ENSG00000226138.4	RP1-228P16.7	1.33911	-2.01585	1.30203	0.266138	0.488083	1	3	1	0	0	2	0	0
ENSG00000273335.1	RP11-61L19.2	1.33874	-2.01598	1.18564	0.288019	0.510226	1	2	2	0	0	2	0	0
ENSG00000196277.16	GRM7	1.33846	-2.01584	1.83265	0.18959	0.391059	3	2	0	2	1	0	1	1
ENSG00000232354.8	VIPR1-AS1	1.33826	-1.97737	2.09654	0.161765	0.352357	1	1	1	4	1	0	1	1
ENSG00000273771.1	RP11-236L14.2	1.33795	-0.36489	5.10488	0.0341274	0.115554	4	9	15	5	2	9	2	2
ENSG00000223842.1	RP11-135J2.3	1.33794	-2.05541	1.67879	0.208544	0.417223	4	0	1	2	2	0	0	1
ENSG00000229344.1	MTCO2P12	1.3379	-1.799	2.20239	0.152014	0.337707	2	2	1	2	0	0	2	1
ENSG00000254702.1	CTD-2651C21.3	1.33702	-2.09591	1.2281	0.27977	0.50207	0	3	2	0	0	2	0	0
ENSG00000226496.3	LINC00323	1.3368	-1.97743	1.50921	0.232267	0.448294	4	3	0	0	1	0	1	1
ENSG00000153820.13	SPHKAP	1.33523	-1.94014	1.8164	0.191487	0.393741	1	4	1	1	0	0	2	1
ENSG00000166979.13	EVA1C	1.33433	-1.73327	1.77781	0.19609	0.399749	3	0	2	2	1	1	1	0
ENSG00000276814.1	RP1-228P16.8	1.33416	-0.522426	5.9099	0.0236792	0.0875011	2	9	12	14	4	7	2	4
ENSG00000125787.11	GNRH2	1.33241	-1.67077	2.43543	0.132923	0.30867	1	2	3	1	1	0	1	1
ENSG00000185294.7	SPPL2C	1.33206	-1.58158	1.68883	0.207237	0.415327	7	0	2	0	3	0	1	0
ENSG00000251330.3	CTD-2283N19.1	1.33186	-2.09618	2.27794	0.145486	0.328717	1	2	2	2	1	1	1	0
ENSG00000215875.4	ST13P20	1.32989	-1.70172	2.51849	0.126819	0.298908	1	2	3	1	1	1	1	0
ENSG00000279377.1	AC003973.3	1.32895	-1.70204	1.44731	0.241774	0.459593	0	0	2	9	3	0	2	0
ENSG00000146374.14	RSPO3	1.32863	-1.70203	2.03399	0.167883	0.361651	1	0	6	2	2	0	2	0
ENSG00000287756.1	RP5-864I18.1	1.3274	-2.0553	1.90448	0.181471	0.380816	3	1	1	2	1	0	0	2
ENSG00000158022.7	TRIM63	1.32717	-1.83319	1.48467	0.235978	0.45315	0	1	6	0	2	0	0	1
ENSG00000267016.1	RP11-75C10.9	1.3264	-1.79916	2.10311	0.161138	0.351598	3	3	0	3	0	1	3	0
ENSG00000215093.3	EEF1A1P29	1.32603	-1.9032	2.03396	0.167886	0.361651	1	2	1	3	1	0	0	2
ENSG00000279619.1	CTD-2527I21.5	1.32546	-1.86794	1.36461	0.25527	0.476424	4	1	2	0	1	0	0	2
ENSG00000204778.4	CBWD4P	1.32506	0.0150931	6.46499	0.0185687	0.0728252	2	11	23	21	8	5	10	4
ENSG00000224287.2	MSL3P1	1.32441	2.06628	18.1566	0.000320167	0.00282738	61	56	55	67	35	49	22	7
ENSG00000053918.18	KCNQ1	1.32415	-2.05534	1.90522	0.18139	0.380788	2	0	2	3	1	1	0	1
ENSG00000166920.13	C15orf48	1.32353	-1.86773	2.50306	0.127926	0.300598	3	3	1	2	1	1	2	0
ENSG00000260608.1	RP11-382A20.7	1.3232	-1.76588	2.2838	0.144993	0.328033	2	1	2	2	1	1	0	1
ENSG00000283597.3	FAM169B	1.32254	-1.97729	2.15871	0.155949	0.343582	3	1	2	1	1	1	0	1
ENSG00000271664.1	RP4-800G7.3	1.32252	-1.86778	2.5369	0.125511	0.296633	5	3	1	2	1	0	3	1
ENSG00000165309.14	ARMC3	1.32239	-1.73366	2.31865	0.142107	0.323224	3	2	2	2	1	1	2	0
ENSG00000271171.3	LINC00904	1.3221	-1.9773	1.67523	0.20901	0.417915	1	3	0	3	0	2	1	0
ENSG00000177363.5	LRRN4CL	1.32199	-1.70165	2.7422	0.111956	0.273904	3	3	2	1	2	0	1	1
ENSG00000085265.11	FCN1	1.32175	-1.97715	1.19069	0.287022	0.509438	4	0	0	3	0	0	0	3
ENSG00000231760.5	RP11-350J20.5	1.32154	-1.86786	2.01977	0.169313	0.363762	1	3	1	2	1	1	0	1
ENSG00000280282.1	LLNLR-259H9.1	1.32132	-1.67075	1.57089	0.223263	0.436821	4	0	0	5	1	0	1	2
ENSG00000230773.9	AC079807.4	1.32058	-1.83298	1.73671	0.201144	0.40643	2	1	4	0	0	1	1	1
ENSG00000286729.1	RP13-685P2.9	1.32051	-1.64037	2.63064	0.119095	0.285887	4	2	2	1	2	1	1	0
ENSG00000259040.5	BLOC1S5-TXNDC5	1.32	3.31827	7.66207	0.0112331	0.0493947	136	257	151	200	35	149	76	88
ENSG00000272921.1	RP11-500M8.7	1.31948	2.13474	10.6964	0.00350492	0.0194534	78	52	63	80	28	59	42	1
ENSG00000234617.2	SNRK-AS1	1.31936	-0.379277	5.82822	0.0245561	0.0900324	6	16	6	10	7	0	5	6
ENSG00000218233.1	NEPNP	1.31886	-1.86763	2.15599	0.156199	0.343886	4	1	2	2	0	0	2	2
ENSG00000213071.11	LPAL2	1.31772	-0.653944	5.77886	0.0251035	0.0915787	5	7	12	8	1	4	7	3
ENSG00000187688.15	TRPV2	1.31751	-1.61056	2.80569	0.108118	0.26716	2	2	4	1	2	1	1	0
ENSG00000166401.15	SERPINB8	1.31729	2.94836	69.1235	3.14792e-08	3.30649e-06	114	131	107	103	50	46	83	40
ENSG00000255856.2	RP11-87C12.5	1.31696	-1.702	1.83973	0.188769	0.38986	5	0	7	1	5	0	1	0
ENSG00000214546.4	AC087491.2	1.31683	-1.70187	3.05871	0.094276	0.243632	2	3	2	4	1	1	3	0
ENSG00000253457.3	SMIM18	1.31647	-0.235097	7.57029	0.0116631	0.0508653	7	14	22	6	5	7	6	5
ENSG00000254499.1	AC002056.5	1.31611	-1.90319	2.25146	0.147734	0.331872	3	1	2	3	0	1	2	1
ENSG00000278112.1	RP11-972P1.11	1.31608	-1.55286	2.55861	0.123989	0.294243	3	1	1	8	4	0	1	1
ENSG00000273245.1	RP11-434P11.2	1.31574	-1.76602	2.9443	0.100262	0.25411	4	4	3	2	1	0	4	1
ENSG00000226954.1	RP5-983L19.2	1.31493	-1.83295	1.58637	0.221073	0.433775	0	1	3	3	0	0	0	3
ENSG00000267319.1	SELENOKP1	1.31477	-1.64058	1.96982	0.174454	0.371349	3	3	2	3	4	0	0	1
ENSG00000110324.11	IL10RA	1.3143	-1.31846	2.3483	0.139705	0.319569	2	0	5	4	3	0	1	1
ENSG00000179938.12	GOLGA8J	1.31415	-1.76619	1.34803	0.258093	0.479647	0	10	1	0	0	0	4	1
ENSG00000287214.1	RP11-23I22.1	1.31375	-1.76601	1.79533	0.193983	0.397103	2	6	0	1	1	0	1	2
ENSG00000253133.2	RP11-360L9.4	1.31347	-1.7658	1.99599	0.171737	0.367459	0	4	1	4	2	0	0	2
ENSG00000203321.2	CARNMT1-AS1	1.313	-2.0158	2.69152	0.117375	0.282887	4	2	2	1	1	1	1	1
ENSG00000259080.1	RP11-158I13.2	1.3129	-1.44411	1.09706	0.306307	0.527831	4	3	0	0	0	3	0	0
ENSG00000287045.1	RP11-190C21.5	1.31286	-2.01555	1.50328	0.233157	0.449478	1	2	0	4	0	2	0	1
ENSG00000286522.2	H3C2	1.31276	-1.79902	1.66114	0.210867	0.420625	2	0	3	4	2	1	0	1
ENSG00000109063.15	MYH3	1.31275	1.29614	35.9416	4.97263e-06	0.00010987	42	40	35	37	16	17	27	14
ENSG00000229593.1	SUCLA2P3	1.31259	-1.90333	2.41036	0.134833	0.311486	3	1	4	1	0	1	2	1
ENSG00000274383.1	CTD-2017F17.2	1.31217	-0.235348	8.9265	0.00679511	0.0332607	13	7	11	5	6	2	3	6
ENSG00000280614.1	CH507-513H4.4	1.31076	9.76806	17.2652	0.000414606	0.00349843	13065	10177	11087	23122	7613	5731	6987	7407
ENSG00000281181.1	CH507-513H4.3	1.31076	9.76806	17.2652	0.000414606	0.00349843	13065	10177	11087	23122	7613	5731	6987	7407
ENSG00000280800.1	CH507-513H4.6	1.31076	9.73814	20.0218	0.00019012	0.00185661	13065	10177	11087	23122	7613	5731	6987	7407
ENSG00000276728.1	AC142472.6	1.31061	0.618336	14.5123	0.000961586	0.00687361	23	18	12	33	12	14	8	7
ENSG00000105996.7	HOXA2	1.3106	0.143198	4.62118	0.0428595	0.13667	6	15	30	6	1	8	13	5
ENSG00000249923.1	LINC02891	1.30936	-2.01562	1.527	0.229624	0.445063	3	1	1	2	0	3	0	0
ENSG00000171747.9	LGALS4	1.30776	-1.7989	1.72616	0.202466	0.40831	6	1	1	1	0	1	1	2
ENSG00000278802.1	ENSG10010138767.1	1.30667	-2.05518	1.29911	0.26666	0.488776	1	4	0	2	0	3	0	0
ENSG00000286952.1	RP11-241K3.5	1.30623	-1.79886	1.63376	0.214534	0.425579	6	1	1	1	1	1	0	2
ENSG00000225224.1	RPS27AP12	1.30587	-1.52469	2.7535	0.111261	0.272615	7	4	0	4	4	0	1	2
ENSG00000273297.2	RP11-38M8.1	1.30364	-1.67057	1.83299	0.18955	0.391041	0	1	5	3	1	0	0	3
ENSG00000287260.1	RP11-486M3.4	1.30345	-1.3674	3.47603	0.0756909	0.207147	4	4	3	2	1	1	3	1
ENSG00000184434.8	LRRC19	1.30289	-1.79895	1.96682	0.174769	0.371793	0	2	4	3	1	0	0	3
ENSG00000143512.13	HHIPL2	1.30249	-1.4439	4.32219	0.0495106	0.151542	2	4	3	4	2	1	2	1
ENSG00000278915.1	AC005609.18	1.29994	-0.903561	2.55555	0.124202	0.29456	5	2	7	5	6	1	2	0
ENSG00000172971.7	UNC93B3	1.29875	-1.67077	2.23581	0.149084	0.333958	1	3	5	2	3	2	0	0
ENSG00000287089.1	RP3-468B3.6	1.29852	-1.4703	2.65961	0.117191	0.282616	3	3	3	2	1	1	1	2
ENSG00000177096.9	PHETA2	1.29699	-1.47009	3.25919	0.0847584	0.225195	5	4	3	3	2	0	2	3
ENSG00000253284.2	RP11-282K24.3	1.29683	-1.83267	1.56725	0.223782	0.437506	1	3	0	7	0	0	1	4
ENSG00000154175.18	ABI3BP	1.29641	-1.05506	3.62409	0.0701404	0.195494	10	3	4	2	5	2	2	0
ENSG00000232454.2	RP11-3J10.7	1.29575	-1.18057	3.79265	0.0643807	0.183826	2	1	4	10	3	1	2	2
ENSG00000265451.1	CLASP1-AS1	1.29415	-1.36712	3.58224	0.0716603	0.198693	5	4	1	5	3	2	1	1
ENSG00000235253.1	AC010240.2	1.29244	-1.41786	3.4912	0.0750994	0.206026	3	5	5	2	3	0	1	3
ENSG00000227258.6	SMIM2-AS1	1.29134	-1.29389	3.7972	0.0642328	0.183556	5	5	2	7	3	0	2	4
ENSG00000219755.1	RP1-199J3.5	1.29093	-1.73319	1.98046	0.173344	0.369582	3	4	2	0	0	2	0	2
ENSG00000124575.7	H1-3	1.28931	-1.64011	2.65742	0.117333	0.282811	4	2	6	1	3	2	0	1
ENSG00000213433.5	RPLP1P6	1.28739	-1.52464	2.93936	0.10053	0.254521	2	6	4	3	4	2	0	1
ENSG00000255624.3	C10orf88B	1.28705	-0.902691	4.62892	0.0427013	0.136386	9	3	4	7	2	4	5	0
ENSG00000226578.1	RP11-258F22.1	1.28553	-1.18015	4.59253	0.043451	0.138047	7	5	2	7	2	1	3	4
ENSG00000261759.1	RP11-626G11.3	1.28461	-1.52398	1.64055	0.213617	0.42455	1	5	4	1	1	2	0	2
ENSG00000232928.2	DDX3P1	1.28346	-1.34219	4.78434	0.0396599	0.129099	4	4	5	4	3	2	1	2
ENSG00000165621.9	OXGR1	1.28168	-1.67049	1.88633	0.183482	0.383322	1	4	6	0	1	2	0	2
ENSG00000264345.2	LINC01894	1.27943	-0.329549	8.4881	0.00806442	0.0380217	9	6	12	6	7	3	4	2
ENSG00000002587.10	HS3ST1	1.27871	-0.732551	4.0202	0.0574426	0.169148	9	2	13	3	1	1	6	5
ENSG00000237273.1	RSL24D1P8	1.27818	-1.36652	3.93547	0.0599213	0.174366	6	2	6	3	2	2	1	3
ENSG00000204161.14	TMEM273	1.27785	-1.11634	3.37447	0.0797909	0.215052	3	2	7	3	0	3	2	2
ENSG00000256984.2	RP11-551L14.8	1.27779	-0.957686	6.38844	0.019194	0.074612	7	5	6	7	1	3	5	3
ENSG00000142621.20	FHAD1	1.27739	-0.510563	7.32378	0.0129112	0.0550509	8	14	8	5	5	3	6	3
ENSG00000287513.1	RP1-317G22.4	1.27723	-0.976542	6.15585	0.0212429	0.0807179	5	7	4	9	4	2	2	4
ENSG00000205038.12	PKHD1L1	1.2748	-1.11598	5.3665	0.0302511	0.105778	5	8	5	5	5	4	1	1
ENSG00000251550.1	RP11-501C14.7	1.27374	-0.902784	4.06689	0.0561269	0.166279	7	7	10	1	3	5	4	0
ENSG00000171017.11	LRRC8E	1.27242	-1.58094	2.04813	0.166476	0.359424	4	1	12	0	3	1	0	4
ENSG00000113327.17	GABRG2	1.27227	0.533259	16.8867	0.00046362	0.00382345	23	22	23	20	11	14	10	8
ENSG00000279748.1	CTD-3222D19.9	1.27219	0.493194	13.3219	0.00141467	0.0093918	25	12	19	18	11	13	4	8
ENSG00000284642.1	RP4-736L20.5	1.26653	0.934489	21.8816	0.000115855	0.00125684	30	33	30	23	9	13	17	18
ENSG00000259326.1	RP11-102L12.2	1.26537	-0.551546	6.2795	0.0201249	0.0774261	9	11	6	7	4	1	2	9
ENSG00000242375.1	RP11-498P14.3	1.26525	-0.976587	2.9015	0.102614	0.257996	6	7	13	3	0	0	5	9
ENSG00000159905.15	ZNF221	1.26478	1.18475	28.1908	2.51525e-05	0.000379637	33	30	33	35	12	12	24	17
ENSG00000234702.1	VDAC1P3	1.26081	-0.669238	6.96377	0.0150087	0.0617407	4	10	13	6	5	4	2	5
ENSG00000100146.18	SOX10	1.25775	1.56243	6.4802	0.0184471	0.0724306	52	27	56	10	30	8	25	10
ENSG00000235768.1	BRD7P5	1.25608	-0.5651	7.17746	0.0137216	0.0576279	9	11	7	8	2	8	4	3
ENSG00000115507.10	OTX1	1.2532	-0.428558	2.45325	0.131584	0.306461	7	5	12	1	1	3	0	8
ENSG00000189127.8	ANKRD34B	1.25239	0.673217	19.0007	0.000252091	0.00232174	26	20	16	22	12	9	13	8
ENSG00000287110.1	RP11-723O4.10	1.24864	-0.429504	7.07687	0.0143116	0.059474	7	10	11	12	6	1	8	5
ENSG00000258964.1	RP11-618G20.1	1.24563	-1.15948	1.69402	0.206565	0.414372	0	8	7	9	12	0	0	0
ENSG00000228212.1	OFD1P17	1.23805	-0.8504	3.82693	0.0632769	0.181362	4	4	10	6	5	0	5	2
ENSG00000155265.11	GOLGA7B	1.23632	-0.798694	5.34615	0.0305341	0.106533	6	6	8	8	8	1	2	3
ENSG00000269343.9	ZNF587B	1.2363	3.99822	147.493	3.24815e-11	1.12406e-07	219	207	236	228	112	106	131	102
ENSG00000232811.1	RP11-96K19.2	1.23284	0.0893059	11.3771	0.00274818	0.0159671	16	13	14	18	13	2	8	8
ENSG00000177359.20	OVOS2	1.2316	-0.366477	4.90103	0.0375365	0.12402	9	11	8	6	9	6	2	0
ENSG00000172403.11	SYNPO2	1.22976	-1.03511	3.674	0.0683757	0.191917	9	8	4	1	1	2	7	1
ENSG00000236554.1	ASNSP3	1.2286	-0.902355	5.14575	0.0334866	0.114036	11	5	7	7	1	5	7	2
ENSG00000286053.2	ASDURF	1.22655	-0.257703	5.90084	0.0237746	0.0877484	10	13	13	12	5	11	6	2
ENSG00000117281.16	CD160	1.22635	-1.07499	5.30858	0.0310647	0.107827	9	3	5	5	4	1	3	3
ENSG00000253722.1	RP11-10N23.4	1.22553	-0.654125	2.35077	0.139507	0.319194	0	21	5	12	11	8	0	0
ENSG00000282798.1	LLNLR-222A1.1	1.22364	-0.211894	4.58483	0.0436116	0.138478	12	6	12	18	9	9	0	6
ENSG00000278876.1	RP11-498C9.4	1.22282	-0.849205	6.37079	0.0193415	0.0750484	4	8	5	11	5	3	2	4
ENSG00000260274.1	RP11-817O13.8	1.22261	-0.0845229	5.5968	0.0272444	0.0976262	4	6	16	25	9	7	9	1
ENSG00000170961.7	HAS2	1.22155	-0.832652	3.35473	0.0806171	0.216751	6	14	4	2	1	3	6	3
ENSG00000273123.1	RP11-9N20.3	1.22086	-1.47045	2.80208	0.108333	0.267617	3	5	6	2	3	0	4	1
ENSG00000288009.1	RP11-63L7.6	1.22076	-0.442272	7.24825	0.0133226	0.0563369	9	16	6	7	4	8	4	3
ENSG00000187553.10	CYP26C1	1.21979	0.36985	2.66374	0.116922	0.282263	7	5	44	2	5	15	7	2
ENSG00000268975.2	MIA-RAB4B	1.21955	-1.09545	1.57779	0.222283	0.435273	9	0	7	8	7	5	0	0
ENSG00000144229.12	THSD7B	1.21945	-1.07477	2.45017	0.131814	0.306817	12	4	4	2	1	0	4	6
ENSG00000177098.9	SCN4B	1.21914	-0.190862	4.47517	0.045972	0.143828	18	10	8	5	10	4	7	0
ENSG00000259924.1	RP11-16E23.4	1.21822	-1.03519	4.67794	0.0417145	0.133991	7	3	8	4	2	2	4	3
ENSG00000286427.1	RP11-333O1.2	1.21505	-1.3671	4.389	0.0479286	0.148307	4	6	7	3	2	2	4	2
ENSG00000182983.15	ZNF662	1.21317	-1.27082	3.8485	0.0625933	0.179798	6	2	5	5	2	1	3	3
ENSG00000287221.1	RP11-564C4.10	1.21291	-0.902146	4.32905	0.0493456	0.151121	6	5	3	6	1	3	4	2
ENSG00000233708.1	RP11-342M1.7	1.21261	-1.1163	4.70596	0.041162	0.132678	3	4	6	5	4	2	2	1
ENSG00000260398.1	RP11-594N15.3	1.21251	-0.921054	3.98068	0.0585838	0.171665	6	6	5	3	3	4	3	0
ENSG00000225345.3	SNX18P3	1.21198	-1.27109	2.88591	0.103487	0.259445	5	5	7	1	3	2	3	1
ENSG00000237883.2	DGUOK-AS1	1.21119	-0.235545	6.9351	0.0151914	0.0623995	11	13	9	12	9	4	5	5
ENSG00000260060.1	RP11-388M20.1	1.21021	-0.17985	7.25684	0.0132751	0.0561789	14	7	7	11	7	5	7	1
ENSG00000258759.1	RP11-1012A1.7	1.20859	-1.2947	3.305	0.0827429	0.221156	2	4	4	4	4	1	2	0
ENSG00000136167.15	LCP1	1.20655	-1.13673	2.94436	0.100258	0.25411	6	10	1	3	1	2	3	4
ENSG00000278934.1	CTD-2006M22.2	1.20554	-0.470166	4.63542	0.042569	0.136072	5	9	15	8	8	3	6	2
ENSG00000261118.1	RP11-104N10.1	1.20527	-1.05428	3.35751	0.0804999	0.216499	5	4	5	6	2	3	2	3
ENSG00000200087.1	SNORA73B	1.20465	-1.07431	3.73032	0.0664449	0.188126	8	5	3	6	2	2	1	6
ENSG00000232906.1	RP11-746P2.3	1.20431	-1.41765	2.37328	0.137719	0.316054	6	5	1	4	4	0	0	4
ENSG00000249937.8	LINC02223	1.20419	-1.24764	3.30359	0.0828039	0.221277	6	3	3	4	0	2	4	2
ENSG00000253734.2	LINC01289	1.2041	-1.20228	5.05822	0.0348759	0.117362	4	7	4	5	1	3	3	3
ENSG00000175426.11	PCSK1	1.20331	1.25524	16.0489	0.000596251	0.00465647	30	21	55	34	15	15	19	23
ENSG00000128965.13	CHAC1	1.20329	2.95133	45.231	9.36816e-07	3.24351e-05	133	86	125	156	83	43	61	73
ENSG00000278249.1	SCARNA2	1.20265	-1.1367	3.11647	0.0914121	0.238188	3	4	4	11	2	3	1	5
ENSG00000259033.2	RP11-718G2.5	1.19951	-1.61028	2.44537	0.132174	0.307472	7	4	1	2	1	2	3	1
ENSG00000213891.3	RPL3P6	1.19948	-1.58178	2.47266	0.130144	0.304389	2	4	3	3	3	0	2	1
ENSG00000272944.1	CTD-2308L22.1	1.19944	-0.509907	7.12372	0.0140333	0.0586632	12	3	10	10	4	4	7	3
ENSG00000134198.10	TSPAN2	1.19861	-1.22533	2.6933	0.115022	0.279282	3	5	7	1	4	3	1	0
ENSG00000287385.1	CTD-2325P2.5	1.1986	-1.83343	1.45417	0.240696	0.458237	4	5	0	1	1	0	4	0
ENSG00000285188.1	LLNLR-225F10.1	1.19707	0.355237	2.73086	0.112658	0.275112	48	0	17	8	17	13	8	0
ENSG00000250327.1	RPSAP70	1.1967	-1.22506	1.91465	0.180357	0.379335	2	5	7	0	4	1	1	1
ENSG00000173988.13	LRRC63	1.19591	-1.18097	2.68925	0.11528	0.279687	3	4	8	1	2	2	2	2
ENSG00000274191.1	RP11-324E6.10	1.19568	-1.18017	3.99929	0.0580434	0.170551	5	8	3	4	2	4	1	3
ENSG00000224208.1	ZCRB1P1	1.19461	-1.24787	3.18383	0.0881992	0.231867	3	2	1	6	2	1	2	1
ENSG00000285859.1	RP11-80K21.4	1.19311	-1.52474	2.29648	0.143935	0.326305	0	3	7	4	1	2	3	1
ENSG00000284708.1	RP3-330O12.5	1.19207	-1.58101	2.50413	0.12785	0.300569	5	5	1	3	0	2	3	2
ENSG00000233670.7	PIRT	1.19186	-1.83326	1.55211	0.225956	0.440349	2	4	4	0	2	0	3	0
ENSG00000117600.14	PLPPR4	1.19096	-0.849869	5.15956	0.0332732	0.113548	10	7	5	7	3	3	7	2
ENSG00000226544.4	RPL7P22	1.19019	-0.0228134	11.8439	0.00233387	0.0140098	13	10	22	17	8	8	7	9
ENSG00000183423.12	LRIT3	1.18991	-1.41778	2.24011	0.148711	0.333447	1	10	2	1	3	2	1	1
ENSG00000265287.2	RP11-192H23.6	1.18942	-1.67001	1.12476	0.300425	0.521791	5	0	0	7	0	3	3	0
ENSG00000047457.14	CP	1.1893	-1.46977	2.68895	0.115299	0.279687	4	5	2	5	0	2	2	4
ENSG00000263603.1	CTD-2349P21.5	1.18902	-1.52473	2.62489	0.119477	0.286457	3	3	1	5	0	1	3	2
ENSG00000269892.1	RP4-761J14.10	1.18828	-0.294115	7.50642	0.0119731	0.0519146	6	10	13	13	7	2	10	3
ENSG00000197210.7	KB-1592A4.15	1.18702	-1.70196	1.72138	0.20307	0.409195	4	2	1	3	1	1	3	0
ENSG00000234789.1	RP11-483H20.4	1.18618	-1.55259	2.85245	0.10539	0.262583	2	1	3	6	2	1	1	2
ENSG00000061455.11	PRDM6	1.18579	-1.67016	2.30864	0.142929	0.324594	8	2	2	2	0	2	2	3
ENSG00000274588.2	DGKK	1.18495	-0.654279	5.71876	0.0257887	0.0935643	8	5	6	10	5	3	4	3
ENSG00000167779.9	IGFBP6	1.18485	-1.49692	2.94314	0.100325	0.254209	3	1	5	5	1	1	1	4
ENSG00000267898.1	CTD-2639E6.9	1.18447	-1.46995	3.31909	0.082134	0.219921	5	3	2	4	1	2	1	3
ENSG00000288234.1	RP13-122B23.14	1.18446	-1.73369	2.23738	0.148947	0.33376	3	2	2	3	2	1	2	0
ENSG00000236501.6	AC079305.11	1.18378	-1.41774	2.70079	0.114546	0.278688	1	3	7	3	1	3	2	1
ENSG00000255537.1	AP000708.1	1.18345	-1.58139	2.23611	0.149057	0.333926	3	1	2	4	3	1	1	0
ENSG00000276110.1	RP4-790G17.7	1.18283	-1.64017	2.77268	0.110094	0.270676	1	2	3	6	2	2	1	1
ENSG00000274630.1	RP11-229E13.4	1.18232	-1.52444	1.72565	0.202531	0.408363	0	6	2	4	0	2	3	1
ENSG00000286145.2	RP11-314L11.1	1.1808	-1.83301	1.41109	0.247569	0.46689	1	3	0	6	2	0	1	2
ENSG00000268643.2	AC006486.9	1.18011	0.835148	4.18107	0.053051	0.159506	21	21	19	35	0	26	23	1
ENSG00000225746.13	MEG8	1.17883	-1.90341	2.01276	0.170023	0.364823	1	2	2	5	2	0	1	2
ENSG00000286011.1	RP11-717A5.3	1.17824	-1.4701	1.8272	0.190223	0.392051	3	4	0	3	0	1	3	1
ENSG00000230587.2	LINC02580	1.17707	-1.58113	2.60453	0.120842	0.288904	1	2	4	5	1	1	1	3
ENSG00000286828.1	CTD-2215E18.4	1.17704	-1.73335	1.85908	0.186552	0.387273	4	1	1	4	3	1	0	1
ENSG00000176928.7	GCNT4	1.17702	0.126143	11.0513	0.00308519	0.0175676	13	13	13	17	7	11	4	7
ENSG00000266933.2	MADCAM1-AS1	1.177	-1.39122	2.16554	0.155326	0.342576	2	8	4	4	1	4	0	4
ENSG00000263307.1	RSL1D1-DT	1.17692	-1.55267	2.23958	0.148757	0.333468	1	5	1	5	0	2	2	2
ENSG00000275236.1	AC009120.11	1.17606	-1.83296	2.31747	0.142203	0.323305	3	3	2	2	1	1	2	1
ENSG00000269427.1	CTC-429P9.1	1.17549	1.78809	21.5176	0.000127417	0.00134845	55	62	30	31	24	22	29	19
ENSG00000270110.2	RP5-1139B12.4	1.17539	-1.67076	1.94298	0.177296	0.374918	0	4	3	3	1	0	2	2
ENSG00000232075.1	MRPL35P2	1.17441	-1.76591	1.96155	0.175324	0.372321	0	3	3	4	1	1	2	1
ENSG00000259308.3	FABP5P8	1.17417	-1.58093	2.32127	0.141893	0.322896	1	8	4	1	1	3	1	2
ENSG00000176289.4	IDSP1	1.174	-1.44285	1.22746	0.279894	0.502194	11	0	0	5	0	6	0	2
ENSG00000270035.1	RP11-338N10.2	1.17336	-1.03473	4.08299	0.0556811	0.165312	12	3	9	3	5	1	2	6
ENSG00000140832.11	MARVELD3	1.17333	-1.497	2.06647	0.164672	0.356799	3	4	2	3	0	0	1	5
ENSG00000272159.1	RP11-350N15.6	1.17329	0.623719	9.92962	0.0046435	0.024417	25	15	17	28	19	9	9	8
ENSG00000256651.1	RP11-144O23.8	1.17319	-1.70199	1.82268	0.190751	0.392679	4	2	1	1	1	0	3	0
ENSG00000260211.2	RP13-395E19.2	1.17068	-1.86817	1.1112	0.303286	0.52464	0	3	4	1	0	0	4	0
ENSG00000135063.20	FAM189A2	1.17061	-1.39244	1.78388	0.195356	0.398823	1	4	6	1	1	2	1	2
ENSG00000273155.1	RP11-38C17.1	1.17061	0.761105	6.72488	0.0166088	0.066824	17	17	39	17	21	18	2	6
ENSG00000196136.18	SERPINA3	1.17041	-2.01603	1.21635	0.282022	0.504078	7	0	0	1	1	0	2	1
ENSG00000254578.1	CTD-2517M22.16	1.16985	-1.73279	1.23841	0.279693	0.501984	2	8	0	4	0	0	0	7
ENSG00000091664.9	SLC17A6	1.16943	1.34512	16.3698	0.000541087	0.004317	56	34	21	33	22	12	28	15
ENSG00000167131.17	CCDC103	1.16916	-0.701694	1.11407	0.302676	0.52411	0	0	8	4	0	0	0	6
ENSG00000147573.17	TRIM55	1.16903	-1.86806	1.61349	0.2173	0.429308	0	2	4	2	2	0	2	0
ENSG00000287672.1	CTB-104F4.3	1.16749	-0.716444	6.52828	0.0180687	0.0713496	7	10	7	5	4	4	2	5
ENSG00000279598.1	RP11-65L3.3	1.16735	-1.61037	2.70588	0.114223	0.278027	3	1	2	4	1	2	1	1
ENSG00000261786.1	RP4-555D20.2	1.16524	-0.03416	8.94638	0.00674301	0.0330642	14	13	11	13	7	7	10	3
ENSG00000287697.1	RP1-102G20.8	1.16372	-1.64033	2.19245	0.152899	0.339066	1	4	2	3	1	2	1	1
ENSG00000288543.1	RP4-564M11.2	1.16332	-1.83326	1.62128	0.216232	0.427843	2	3	0	3	1	1	2	0
ENSG00000259585.2	RBM17P4	1.16301	-1.76567	1.95441	0.176079	0.3734	1	4	2	3	1	2	1	1
ENSG00000101082.14	SLA2	1.16291	-1.83334	1.24699	0.276201	0.498184	2	5	1	0	0	0	3	1
ENSG00000230841.2	RPL23AP15	1.16255	-1.83286	1.65044	0.212291	0.422582	1	3	2	4	0	3	2	0
ENSG00000198133.9	TMEM229B	1.16254	-0.995989	4.99358	0.0359434	0.120209	6	7	7	3	2	2	5	3
ENSG00000275223.1	RP1-63M2.7	1.16105	-1.90363	1.64222	0.213393	0.424163	3	1	2	2	2	1	1	0
ENSG00000155875.15	SAXO1	1.16092	-1.83314	2.11621	0.159897	0.349913	2	3	2	1	2	0	1	1
ENSG00000249328.3	RP11-26J3.1	1.16085	-1.67057	1.86849	0.185484	0.385694	1	2	3	4	2	3	0	0
ENSG00000134321.13	RSAD2	1.16034	-0.884713	4.8348	0.0387254	0.126907	3	7	7	6	3	3	4	2
ENSG00000219395.2	HSPA8P15	1.15981	-1.6406	2.26677	0.146429	0.330081	1	3	2	2	2	0	1	1
ENSG00000161643.13	SIGLEC16	1.15937	-1.58137	1.70501	0.205152	0.412315	3	4	1	2	1	1	0	3
ENSG00000255320.1	RP11-755F10.1	1.15931	-1.52479	2.03599	0.167683	0.361382	4	3	2	1	1	1	0	3
ENSG00000271550.1	BNIP3P11	1.15757	-1.97736	1.30728	0.265203	0.487397	4	0	0	4	1	1	1	1
ENSG00000279130.1	RP11-278J6.4	1.15681	-1.86773	1.54104	0.227564	0.442294	4	1	2	1	0	0	2	2
ENSG00000215190.9	LINC00680	1.15633	1.55862	21.4229	0.00013063	0.00137405	42	38	42	53	15	17	39	23
ENSG00000198464.14	ZNF480	1.15604	4.01055	95.6525	1.84455e-09	7.1398e-07	195	270	233	248	128	136	119	121
ENSG00000235209.1	CTA-150C2.13	1.15567	-1.76586	1.61802	0.216678	0.42848	0	2	1	5	1	0	1	2
ENSG00000197061.5	H4C3	1.15557	-1.52458	2.16713	0.155181	0.34238	2	3	4	1	0	2	1	2
ENSG00000226604.2	PAPPA-AS2	1.15464	-1.83302	1.60365	0.21866	0.430984	4	3	0	1	0	1	2	1
ENSG00000285812.1	RP11-465B22.9	1.15406	-1.94008	1.54995	0.226269	0.440755	1	3	2	2	0	0	2	2
ENSG00000273011.1	RP11-728K20.3	1.15346	-1.7991	1.25301	0.275078	0.496902	2	2	0	4	0	2	2	0
ENSG00000196196.3	HRCT1	1.15312	-1.8677	1.07686	0.310697	0.53202	4	0	0	4	2	2	0	0
ENSG00000213979.3	RPL7AP14	1.15297	-1.83308	1.4958	0.234286	0.450963	4	2	0	2	2	1	0	1
ENSG00000251349.3	MSANTD3-TMEFF1	1.15282	5.02718	17.0385	0.000443242	0.00368171	322	484	521	543	106	468	190	212
ENSG00000263934.5	SNORD3A	1.15277	3.76989	25.3943	4.81952e-05	0.000632063	168	179	180	400	144	109	125	121
ENSG00000124134.9	KCNS1	1.15258	-1.79923	1.64628	0.212846	0.423353	2	1	2	3	1	1	1	1
ENSG00000239945.1	RP11-34P13.8	1.15183	-1.76554	1.22243	0.280854	0.503037	0	5	5	0	0	1	1	3
ENSG00000162771.8	FAM71A	1.15167	-1.3188	1.51403	0.231547	0.447309	7	3	6	1	9	0	0	0
ENSG00000248714.7	RP11-1079K10.3	1.15146	-1.86779	1.97821	0.173577	0.369938	1	3	1	3	1	1	1	1
ENSG00000189190.10	ZNF600	1.15142	1.86657	34.1935	7.02098e-06	0.000144089	46	57	46	49	29	28	27	22
ENSG00000169562.13	GJB1	1.15123	-1.8679	1.36197	0.255717	0.476861	3	1	2	2	0	2	2	0
ENSG00000249741.2	RP11-673E1.3	1.15087	-1.79885	1.49685	0.234128	0.450784	0	5	2	3	0	3	1	1
ENSG00000257842.6	LINC02588	1.14918	-1.1373	4.08737	0.0555604	0.16506	4	3	6	8	3	1	2	5
ENSG00000266876.1	RP11-1148O4.1	1.1484	-0.884636	4.74	0.0405018	0.131087	2	10	6	5	2	4	3	3
ENSG00000148483.9	TMEM236	1.1473	-1.93991	1.2771	0.270635	0.493059	0	3	4	1	2	0	0	2
ENSG00000273184.1	RP11-212P7.3	1.14613	1.90324	11.828	0.00234677	0.014075	54	85	39	49	20	55	22	23
ENSG00000227920.3	RP1-153P14.5	1.14544	-1.83303	1.47775	0.237038	0.454244	0	1	6	1	1	1	1	1
ENSG00000100678.19	SLC8A3	1.14506	0.300335	11.5411	0.00259404	0.015254	14	16	23	9	8	10	8	7
ENSG00000138311.18	ZNF365	1.14492	1.71891	30.1402	1.6343e-05	0.000274005	41	41	52	45	20	27	27	22
ENSG00000285966.1	RP11-7F17.10	1.14434	-1.73351	1.59226	0.220246	0.432898	2	2	3	1	0	0	1	3
ENSG00000081041.9	CXCL2	1.14357	-1.86773	1.71562	0.2038	0.410372	1	2	3	2	0	0	1	3
ENSG00000169752.17	NRG4	1.14206	0.783407	7.71488	0.0109937	0.0484883	13	31	7	43	19	8	13	11
ENSG00000270248.1	CTC-471J1.10	1.142	-1.79889	1.18475	0.288197	0.510378	2	1	4	1	1	0	0	3
ENSG00000255234.6	RP11-727A23.10	1.14118	-1.76588	1.83368	0.18947	0.390939	2	1	4	1	0	1	1	2
ENSG00000279983.1	CH17-140K24.8	1.14051	-1.94018	0.775893	0.387942	0.612605	1	0	0	5	3	0	0	0
ENSG00000205238.10	SPDYE2	1.13986	-0.457496	2.78974	0.109068	0.269025	13	12	7	3	7	0	9	3
ENSG00000139344.8	AMDHD1	1.13947	-1.93981	1.65014	0.21233	0.4226	2	1	2	3	1	2	0	1
ENSG00000279232.2	CTC-463N11.4	1.13947	2.97218	22.2545	0.000105185	0.00116856	110	113	85	133	48	82	85	24
ENSG00000270959.1	LPP-AS2	1.13946	0.170124	8.00428	0.00977807	0.0442691	12	10	18	11	2	10	6	9
ENSG00000267415.1	CTC-503J8.2	1.13906	-1.9394	1.07014	0.313933	0.535669	4	6	0	0	0	4	0	1
ENSG00000274351.1	RP11-203I16.7	1.13895	-1.76557	1.12663	0.300034	0.521368	6	0	2	0	1	3	0	0
ENSG00000265136.1	RP13-638C3.6	1.13794	-1.94042	1.1148	0.302522	0.52408	1	1	3	1	0	0	3	0
ENSG00000273294.1	C1QTNF3-AMACR	1.13674	1.31069	2.26564	0.146525	0.330249	54	41	28	63	0	34	0	63
ENSG00000269794.1	AC010642.2	1.1367	-1.41812	2.25614	0.147334	0.331406	3	2	1	9	3	1	4	0
ENSG00000229204.3	PTGES3P3	1.13591	0.376947	8.49408	0.00804542	0.0379554	6	31	17	15	8	10	10	9
ENSG00000231206.2	HNRNPA1P25	1.13525	-2.09648	1.11684	0.302091	0.523464	0	3	2	1	1	0	2	0
ENSG00000226312.7	CFLAR-AS1	1.13512	-1.27068	2.23344	0.149289	0.334198	4	9	1	5	0	2	4	4
ENSG00000244582.2	RPL21P120	1.13443	-1.90291	1.1816	0.288823	0.510995	3	1	0	4	0	2	0	2
ENSG00000223697.3	AF230666.2	1.13426	-1.15884	3.04599	0.0949203	0.244544	6	4	7	2	1	1	3	5
ENSG00000275489.2	C17orf98	1.13339	-2.05552	0.974607	0.334291	0.556406	0	0	0	6	1	0	1	1
ENSG00000187642.9	PERM1	1.13304	-1.90343	0.945572	0.341442	0.563978	3	0	0	3	1	0	1	1
ENSG00000198580.7	RP11-611L7.2	1.13171	-0.685424	3.69423	0.067675	0.190486	4	5	9	8	7	0	3	4
ENSG00000286628.1	RP5-963E22.8	1.13065	-1.73295	1.31385	0.264039	0.486356	3	2	1	2	0	3	0	1
ENSG00000213090.2	SCYL2P1	1.13036	-0.609835	4.15902	0.0536298	0.160843	2	4	13	11	4	6	4	2
ENSG00000224019.1	RPL21P32	1.13006	-2.18108	1.08507	0.310673	0.53202	1	1	0	4	2	0	0	1
ENSG00000213406.3	ANXA2P1	1.12973	-1.22525	3.04788	0.0948244	0.244433	2	6	5	4	1	1	4	3
ENSG00000175097.8	RAG2	1.1296	-1.97753	1.10284	0.305068	0.526512	1	0	1	4	2	0	0	1
ENSG00000244056.3	RN7SL417P	1.12947	-1.86778	1.25735	0.27427	0.496126	2	0	1	3	2	0	0	1
ENSG00000261061.1	RP11-303E16.2	1.12911	-0.624997	2.89384	0.103042	0.258747	4	13	4	19	10	3	9	0
ENSG00000172782.13	FADS6	1.12845	-2.1381	1.32186	0.26263	0.484824	1	3	0	2	1	0	1	1
ENSG00000220721.2	OR1F12	1.12843	-2.09619	1.31821	0.263272	0.485588	1	3	0	2	1	0	1	1
ENSG00000267107.8	PCAT19	1.12816	-1.9777	1.01942	0.323656	0.545038	3	2	0	1	2	0	0	1
ENSG00000203808.12	BVES-AS1	1.1281	-1.83303	1.44345	0.242384	0.460311	3	0	1	2	1	1	1	0
ENSG00000157510.14	AFAP1L1	1.12803	-0.317877	7.09609	0.0141967	0.0591899	10	13	11	15	8	2	14	3
ENSG00000277687.1	RP11-427L15.2	1.12753	0.82756	16.5161	0.000517815	0.00416736	26	29	20	29	17	7	18	15
ENSG00000264743.2	DPRXP4	1.12684	-2.13798	1.04167	0.31855	0.539986	0	3	0	3	2	0	0	1
ENSG00000197734.10	C14orf178	1.12682	-2.01613	1.09363	0.307046	0.528618	1	5	0	0	0	0	2	1
ENSG00000268981.5	CTC-457E21.9	1.12644	-2.0963	1.32832	0.261501	0.48361	1	3	1	1	1	0	1	1
ENSG00000223382.5	LINC01778	1.12644	-2.09622	1.4811	0.236524	0.453663	1	3	1	1	1	0	1	1
ENSG00000244265.2	SIAH2-AS1	1.12635	-2.1381	1.3637	0.255425	0.476576	2	1	2	1	0	1	2	0
ENSG00000230795.3	HLA-K	1.12635	-1.97749	1.3522	0.257378	0.479027	1	2	1	2	2	0	0	1
ENSG00000251323.3	LINC02728	1.12623	-0.013241	6.74568	0.0164622	0.0663595	11	21	6	16	10	10	2	7
ENSG00000261675.1	RP5-1119A7.17	1.12605	-2.0159	1.31913	0.26311	0.4855	1	2	2	1	1	0	1	1
ENSG00000180929.6	GPR62	1.1245	-1.97759	1.31418	0.263982	0.486356	0	3	2	1	1	0	1	1
ENSG00000255964.1	HSPD1P12	1.12449	-1.94016	1.15169	0.294851	0.516598	3	0	2	1	2	1	0	0
ENSG00000236296.8	GUSBP5	1.12446	-0.168668	8.91778	0.00681808	0.0333614	16	8	12	10	8	6	7	4
ENSG00000237781.3	ADAMTSL4-AS2	1.12394	-2.0557	1.13212	0.298888	0.520419	2	1	3	0	2	0	0	1
ENSG00000124107.5	SLPI	1.12193	-2.0556	0.889909	0.355769	0.579517	0	6	0	0	2	0	0	1
ENSG00000160886.13	LY6K	1.12114	-1.93993	1.24419	0.276727	0.498807	0	1	3	2	2	1	0	0
ENSG00000286312.1	RP11-484I6.9	1.12068	-1.29391	2.89946	0.102728	0.258125	4	8	3	4	1	5	2	2
ENSG00000116774.12	OLFML3	1.12035	-1.11593	2.11349	0.160153	0.350245	6	1	6	6	3	7	0	0
ENSG00000188958.9	UTS2B	1.11999	-1.15904	3.5614	0.0724315	0.200386	3	5	5	4	2	3	2	2
ENSG00000233820.2	RP11-535M15.2	1.11915	-1.73354	1.36654	0.254945	0.476098	3	1	1	1	1	0	0	2
ENSG00000286741.1	CTD-2004A9.2	1.11898	-2.13797	1.33257	0.260761	0.482695	1	2	1	2	0	0	1	2
ENSG00000277446.1	Metazoa_SRP	1.11831	-2.13793	1.01001	0.32585	0.547401	4	0	2	0	1	0	0	2
ENSG00000272273.1	IER3-AS1	1.11784	-2.13774	0.8352	0.370702	0.594944	6	0	0	0	0	2	1	0
ENSG00000246379.8	RP11-461O7.1	1.11771	-1.76576	1.45021	0.241318	0.458979	1	2	1	2	1	0	0	2
ENSG00000256069.7	A2MP1	1.1175	-2.05543	1.0669	0.312893	0.534495	3	3	0	0	1	0	0	2
ENSG00000237666.2	AC108868.3	1.11734	-2.05543	1.15353	0.294475	0.516245	4	0	1	1	1	1	0	1
ENSG00000247213.7	LINC01498	1.11729	-2.0554	1.34288	0.258977	0.480547	1	0	2	3	0	1	1	1
ENSG00000247809.9	NR2F2-AS1	1.11652	1.03175	6.04365	0.0223178	0.0837899	19	20	46	9	7	22	17	5
ENSG00000269938.1	RP11-214K3.20	1.11625	-2.01593	1.17276	0.290587	0.51235	2	2	0	2	1	1	0	1
ENSG00000267781.1	SLC25A36P1	1.11589	-1.4704	2.84084	0.10606	0.263838	3	3	5	4	2	2	3	1
ENSG00000249476.2	CTD-2587M2.1	1.11531	-1.31752	2.57745	0.122686	0.292027	3	4	5	5	2	2	1	4
ENSG00000130037.5	KCNA5	1.11498	-1.47044	1.41003	0.247741	0.467119	1	4	0	1	1	1	0	1
ENSG00000228702.1	RP11-671E7.1	1.11456	-2.09606	1.31907	0.26312	0.4855	2	1	1	2	0	2	1	0
ENSG00000270123.4	VTRNA2-1	1.11433	-2.01585	1.16111	0.292934	0.514974	2	3	1	0	0	1	1	1
ENSG00000154102.11	C16orf74	1.11409	-1.47026	2.66065	0.117123	0.282516	2	3	4	6	2	0	2	4
ENSG00000169618.7	PROKR1	1.11399	-0.640046	5.92019	0.0235711	0.0872182	5	8	6	5	3	2	5	3
ENSG00000234219.1	CDCA4P4	1.11367	-2.09621	1.16306	0.292539	0.514513	1	3	2	0	1	0	0	2
ENSG00000107984.10	DKK1	1.11348	-0.580764	3.57052	0.0720926	0.199608	11	13	4	3	5	4	8	0
ENSG00000231066.3	NPM1P9	1.11282	-1.47006	2.03151	0.168132	0.361965	5	5	0	5	2	2	2	2
ENSG00000275585.2	PDE4DIPP4	1.11252	-2.1809	1.09232	0.309105	0.530702	1	0	2	3	1	2	0	0
ENSG00000214289.2	RPL39P5	1.11184	-1.76603	1.12037	0.301347	0.522753	2	1	2	1	1	2	0	0
ENSG00000224746.2	AC015987.1	1.11176	-1.94011	1.12776	0.299796	0.521123	1	1	4	0	0	1	1	1
ENSG00000203801.8	LINC00222	1.11172	-2.13786	1.00909	0.326066	0.547598	0	3	0	3	1	2	0	0
ENSG00000236493.2	EIF2S2P3	1.11166	-0.625084	4.33893	0.0491089	0.150741	2	6	9	14	5	3	7	2
ENSG00000237807.4	RP11-400K9.4	1.11154	-1.58144	2.11727	0.159797	0.349749	2	4	7	2	1	3	4	0
ENSG00000188649.15	CC2D2B	1.10964	-1.36748	2.21698	0.150726	0.336087	2	3	1	7	4	1	2	0
ENSG00000214264.4	KCTD9P4	1.10937	-1.47032	2.40321	0.135384	0.31229	4	4	6	1	4	3	1	0
ENSG00000261771.5	DNAAF4-CCPG1	1.10923	0.99454	1.5137	0.231597	0.447374	77	20	38	10	0	46	33	0
ENSG00000226455.1	RP3-512E2.2	1.10903	-2.01587	1.11838	0.301766	0.523164	1	1	3	1	1	2	0	0
ENSG00000227409.1	ZMYM4-AS1	1.10856	-2.01598	0.963149	0.337087	0.559421	0	5	0	1	1	2	0	0
ENSG00000271707.1	ATP1B3P1	1.10809	-0.41681	5.93885	0.0233768	0.086789	9	11	6	7	5	5	5	3
ENSG00000214243.3	AC004980.10	1.10758	-1.01485	4.0373	0.0569568	0.168084	8	6	8	4	4	2	1	7
ENSG00000226891.9	LINC01359	1.10724	-0.523708	6.02249	0.0225272	0.0843939	8	7	7	9	6	3	5	3
ENSG00000268333.1	RP4-806M20.3	1.10699	-0.921659	2.83531	0.106381	0.264194	9	6	2	10	6	1	7	1
ENSG00000259948.2	RP11-326A19.5	1.10682	1.28781	10.9701	0.00317613	0.0179598	13	39	52	39	16	28	16	18
ENSG00000189433.7	GJB4	1.10676	-1.97729	1.39345	0.250457	0.47037	3	1	1	1	0	1	0	2
ENSG00000253309.7	SERPINE3	1.10672	-2.0157	1.10072	0.305522	0.526903	3	1	1	1	0	1	0	2
ENSG00000218574.1	HNRNPA1P37	1.10661	-2.18082	1.24923	0.277668	0.499795	2	1	1	2	0	1	0	2
ENSG00000154975.14	CA10	1.10596	-1.52421	1.734	0.201483	0.40686	11	2	1	1	3	2	0	3
ENSG00000250668.2	LINC02123	1.10592	-1.90334	1.10084	0.305495	0.5269	2	1	0	3	0	2	0	1
ENSG00000095585.17	BLNK	1.1058	-2.01574	1.03389	0.320322	0.541929	2	1	0	3	0	2	0	1
ENSG00000245522.2	LINC02709	1.10565	-1.90327	1.04807	0.317101	0.538422	2	3	0	1	0	1	0	2
ENSG00000265443.1	CTD-2349P21.6	1.10521	-2.13761	1.10189	0.305272	0.526683	3	0	1	2	0	2	0	1
ENSG00000143119.14	CD53	1.10514	-2.05518	1.19782	0.285621	0.507826	2	2	1	1	0	1	0	2
ENSG00000109854.14	HTATIP2	1.10487	-0.56618	5.89831	0.0238014	0.0878003	4	11	12	6	4	5	6	3
ENSG00000271643.2	PDCD6IP-DT	1.10445	0.603932	13.1125	0.00151643	0.00991318	15	18	23	29	14	13	13	7
ENSG00000137801.11	THBS1	1.10358	0.760743	6.55108	0.0178923	0.0708247	13	14	36	14	6	7	8	21
ENSG00000213234.4	ST13P10	1.10295	-1.31838	2.69347	0.115011	0.279282	3	2	6	9	6	1	3	1
ENSG00000287576.1	RP11-661A12.15	1.10047	-1.05492	3.85491	0.0623917	0.179381	10	7	3	2	3	3	4	2
ENSG00000266648.1	SETP3	1.1004	-1.49755	2.26515	0.146567	0.330297	2	4	2	5	4	1	1	1
ENSG00000225806.8	RP1-309F20.3	1.10024	-0.0632479	8.99995	0.00660486	0.0325025	16	12	13	17	9	10	8	5
ENSG00000287935.1	CTD-2245O6.4	1.09945	-1.61049	2.35675	0.13903	0.318312	3	3	3	4	3	2	2	0
ENSG00000269843.1	CTC-490E21.10	1.09862	-2.09599	1.01537	0.324598	0.546064	0	3	2	1	0	2	0	1
ENSG00000263033.2	RP11-396B14.2	1.09859	-1.55249	1.94637	0.176934	0.374383	4	2	2	5	1	1	3	2
ENSG00000225578.1	NCBP2-AS1	1.09742	-1.34202	2.31955	0.142033	0.323131	8	1	2	4	1	4	1	2
ENSG00000280402.1	RP11-20I23.10	1.09681	-0.686505	2.40733	0.135066	0.311764	10	7	13	4	5	0	10	4
ENSG00000279050.1	PWAR1	1.09602	-1.79905	0.761668	0.392253	0.616598	0	0	5	1	0	3	0	0
ENSG00000164438.6	TLX3	1.09484	0.937494	15.8812	0.000627504	0.004854	25	22	23	23	17	6	14	15
ENSG00000250999.2	RP11-1379J22.5	1.09483	-1.70208	1.54663	0.226751	0.441369	6	1	1	3	2	0	4	0
ENSG00000175697.11	GPR156	1.09287	0.811823	15.7514	0.000652951	0.00499916	28	18	29	29	17	15	15	11
ENSG00000280502.1	Metazoa_SRP	1.09266	-1.61051	2.62506	0.119465	0.286457	1	2	5	5	1	2	3	1
ENSG00000273590.4	SMIM11B	1.09252	1.31023	5.07797	0.0345569	0.116657	62	46	42	37	15	53	28	7
ENSG00000261889.1	RP11-473M20.16	1.09169	-0.957599	3.06594	0.0939119	0.242941	4	8	5	7	4	4	0	5
ENSG00000120329.7	SLC25A2	1.09156	-1.70154	2.44195	0.132431	0.307879	2	2	4	5	3	2	1	1
ENSG00000285652.1	RP11-537D2.1	1.0886	-1.55213	2.45744	0.131271	0.306192	3	5	2	5	0	3	1	4
ENSG00000228791.8	THRB-AS1	1.08802	-1.41778	2.03505	0.167777	0.361528	2	1	6	4	3	3	1	0
ENSG00000237457.6	LINC01351	1.08621	-0.580256	5.0575	0.0348875	0.117373	7	7	6	9	2	6	6	2
ENSG00000214353.8	VAC14-AS1	1.08604	-0.509274	6.41093	0.0190079	0.0740911	6	8	9	15	4	5	5	7
ENSG00000279863.1	RP11-521C22.2	1.08604	-0.158347	4.10755	0.055009	0.163931	14	17	3	12	7	0	12	7
ENSG00000280239.1	CTB-50L17.8	1.0851	0.504555	12.2409	0.00203523	0.0125351	27	20	25	18	16	8	20	7
ENSG00000279530.2	RP11-398J13.1	1.08439	-0.125861	8.03676	0.00965119	0.0438418	17	9	11	13	10	7	7	4
ENSG00000187959.9	CPSF4L	1.08413	-1.70159	2.15389	0.156391	0.344227	1	7	2	3	2	1	1	3
ENSG00000125430.9	HS3ST3B1	1.08291	3.05471	41.9177	1.65063e-06	4.82011e-05	96	127	115	117	53	84	61	56
ENSG00000262165.2	C17orf114	1.0828	-1.39221	2.282	0.145144	0.328191	4	2	6	1	2	2	1	2
ENSG00000250615.1	CTC-564N23.2	1.08164	0.00447061	5.72491	0.0257177	0.0934007	21	5	9	13	8	3	8	8
ENSG00000268140.1	PCGF7P	1.08108	-0.456393	5.41171	0.0296326	0.104307	8	8	6	10	3	2	10	3
ENSG00000104722.14	NEFM	1.08074	6.84743	111.014	4.73734e-10	3.74723e-07	1513	1435	1989	1514	786	940	1146	762
ENSG00000254131.1	RP11-1007J8.1	1.08037	-2.22555	0.781579	0.386239	0.610785	2	1	0	1	0	0	2	0
ENSG00000236576.1	RP11-22B10.3	1.08035	-2.27148	0.83862	0.369742	0.594305	3	0	0	1	1	0	1	0
ENSG00000215704.10	CELA2B	1.08034	-2.13823	0.881871	0.357908	0.581325	1	1	0	2	0	0	2	0
ENSG00000226971.1	AF196972.4	1.08025	-2.05571	0.838915	0.369659	0.594207	1	1	0	2	0	0	2	0
ENSG00000284800.1	RP11-353J17.5	1.07991	-1.97757	0.77034	0.389616	0.613953	4	0	0	0	1	0	1	0
ENSG00000039139.11	DNAH5	1.07986	-2.13833	0.888927	0.356029	0.579634	2	0	1	1	0	0	2	0
ENSG00000267060.7	PTGES3L	1.07981	-0.684795	3.50842	0.0744346	0.20462	4	7	8	8	3	1	5	6
ENSG00000279594.1	RP11-950C14.10	1.07971	-0.366043	4.33726	0.0491487	0.150785	11	8	9	8	3	8	7	2
ENSG00000260317.1	RP11-48B3.4	1.07967	0.10684	7.29615	0.01306	0.0554976	4	17	13	16	9	5	7	7
ENSG00000266490.1	CTD-2349P21.9	1.07904	0.260584	6.60335	0.017495	0.0695806	20	20	9	15	12	2	7	15
ENSG00000250111.3	AC107982.4	1.07884	-1.61035	1.0233	0.322758	0.544054	0	2	11	0	4	3	0	0
ENSG00000224761.4	CCNYL4	1.07881	-2.27154	0.787233	0.384556	0.608993	0	2	0	2	0	0	2	0
ENSG00000258949.1	RP11-857B24.5	1.07871	-2.18119	0.697989	0.412461	0.635376	0	0	0	4	2	0	0	0
ENSG00000233163.1	RPS12P17	1.07857	-2.22571	0.96551	0.336509	0.558835	2	1	0	1	1	0	1	0
ENSG00000260240.4	APOOP5	1.07853	-2.18128	0.749763	0.395916	0.61989	2	0	0	2	2	0	0	0
ENSG00000203437.3	RP11-820K3.3	1.07852	-2.18135	0.912606	0.349826	0.572971	2	1	0	1	1	0	1	0
ENSG00000230162.1	CT45A11P	1.07848	-2.22564	0.837374	0.370091	0.594625	3	1	0	0	1	0	1	0
ENSG00000259654.1	RP11-245C17.2	1.07848	-2.31884	0.834202	0.372533	0.596575	0	1	1	2	0	0	2	0
ENSG00000138483.3	CCDC54	1.07836	-2.22568	0.866061	0.36217	0.585807	0	1	1	2	0	0	2	0
ENSG00000254862.5	LGR4-AS1	1.07826	-2.09606	0.583718	0.452992	0.66807	4	0	0	0	2	0	0	0
ENSG00000213078.3	RP5-933K21.2	1.07817	-2.22558	0.780414	0.386587	0.611046	2	1	1	0	0	0	2	0
ENSG00000180210.15	F2	1.078	-2.05588	0.93872	0.343161	0.565852	2	0	1	1	1	0	1	0
ENSG00000231562.1	RP11-508N12.3	1.07793	-2.27157	0.867131	0.361879	0.585542	1	0	2	1	0	0	2	0
ENSG00000141433.13	ADCYAP1	1.07739	1.64596	18.9359	0.000256712	0.0023549	34	36	52	49	26	13	31	27
ENSG00000239719.1	RP4-800G7.1	1.07691	-2.18134	0.822818	0.374207	0.598321	0	2	0	2	1	0	1	0
ENSG00000141738.14	GRB7	1.07691	-2.18127	0.817654	0.375683	0.59985	0	2	0	2	1	0	1	0
ENSG00000178860.9	MSC	1.07687	-2.22561	0.858951	0.36411	0.588121	1	1	0	2	2	0	0	0
ENSG00000285684.1	RP11-263K14.1	1.07687	-1.2937	3.47112	0.0758835	0.20749	5	5	7	5	1	6	3	2
ENSG00000279518.1	AC083843.4	1.07678	-2.22577	0.79084	0.383488	0.607824	2	2	0	0	1	0	1	0
ENSG00000276136.1	RP11-50I19.2	1.07654	-1.36692	2.03746	0.167537	0.361094	4	6	2	1	2	2	0	3
ENSG00000175820.4	CCDC168	1.07647	-2.22576	1.08844	0.30817	0.529655	1	1	1	1	1	0	1	0
ENSG00000234667.2	ACTL11P	1.07644	-2.09636	0.83516	0.370713	0.594944	0	1	1	2	1	0	1	0
ENSG00000174417.3	TRHR	1.07634	-2.18126	1.00724	0.326499	0.547926	2	1	1	0	1	0	1	0
ENSG00000234210.1	AC006372.4	1.07617	-0.443688	3.22248	0.0864147	0.228432	12	8	11	1	2	4	11	1
ENSG00000219712.1	RP11-532F6.2	1.07609	-2.31882	0.829836	0.373761	0.597814	2	0	2	0	1	0	1	0
ENSG00000245466.1	CTD-2540L5.6	1.07584	-1.94017	1.0547	0.31561	0.536905	1	0	2	1	1	0	1	0
ENSG00000184860.10	SDR42E1	1.07582	-2.2716	0.765684	0.391029	0.615408	0	0	3	1	0	0	2	0
ENSG00000277893.2	SRD5A2	1.07521	-2.27154	0.835283	0.370679	0.594944	0	3	0	1	1	0	1	0
ENSG00000280399.1	RP11-80P20.3	1.07487	-1.94039	0.879136	0.35864	0.58207	1	2	0	1	2	0	0	0
ENSG00000242405.2	RP11-267J23.1	1.07481	-2.27154	0.956151	0.338812	0.561244	0	2	1	1	1	0	1	0
ENSG00000141448.11	GATA6	1.07464	-2.18131	1.00871	0.326154	0.547711	1	2	1	0	1	0	1	0
ENSG00000254162.1	RP11-48B3.3	1.07452	-0.0436889	7.34624	0.0127915	0.0546336	15	7	11	8	9	5	4	5
ENSG00000279521.1	RP11-314P15.1	1.07434	-2.18142	0.911646	0.350074	0.573276	0	1	2	1	1	0	1	0
ENSG00000159445.13	THEM4	1.07432	3.5268	92.7764	2.42688e-09	7.9045e-07	169	175	168	163	91	84	105	102
ENSG00000119147.10	ECRG4	1.07397	-1.52465	1.77487	0.196446	0.400194	3	3	6	1	2	2	0	3
ENSG00000264860.1	RP11-143K11.5	1.07322	-2.13823	0.769763	0.389791	0.614123	1	3	0	0	2	0	0	0
ENSG00000259677.1	RP11-493E3.1	1.07298	-2.22574	0.863695	0.362814	0.586711	0	2	1	1	2	0	0	0
ENSG00000233483.3	EFCAB15P	1.07292	-2.13824	0.846371	0.36758	0.591552	0	3	1	0	1	0	1	0
ENSG00000270606.1	PPIAP52	1.0724	-1.9038	0.96114	0.337581	0.559972	0	2	2	0	1	0	1	0
ENSG00000132958.17	TPTE2	1.07213	-2.13836	0.853398	0.365636	0.589656	0	1	3	0	1	0	1	0
ENSG00000092969.12	TGFB2	1.07164	0.516762	6.91517	0.0153198	0.0627875	17	19	26	8	13	5	18	4
ENSG00000126231.15	PROZ	1.07153	-2.13827	0.616014	0.440921	0.659618	0	4	0	0	2	0	0	0
ENSG00000263293.2	EFCAB13-DT	1.07076	-2.1811	0.881382	0.358039	0.581469	2	0	0	2	0	0	1	1
ENSG00000259096.1	SHLD2P2	1.07071	-2.0558	0.83234	0.371507	0.595621	0	2	2	0	2	0	0	0
ENSG00000215533.8	LINC00189	1.06986	-1.553	1.9485	0.176707	0.374159	1	4	1	5	2	2	2	0
ENSG00000189057.11	FAM111B	1.0693	3.45576	57.3708	1.46556e-07	8.68821e-06	130	160	161	155	88	71	114	73
ENSG00000248152.2	ANK2-AS1	1.06912	-2.09627	0.819221	0.375235	0.599333	0	1	0	3	0	0	1	1
ENSG00000181616.10	OR52H1	1.06888	-2.22545	0.812391	0.377197	0.601584	3	0	0	1	1	0	0	1
ENSG00000204792.2	LINC01291	1.06878	1.48871	25.3416	4.88083e-05	0.000637267	36	46	42	39	20	28	24	20
ENSG00000223899.1	SEC13P1	1.06869	-2.27129	0.923795	0.346948	0.570079	1	0	1	2	0	0	1	1
ENSG00000166126.11	AMN	1.06856	-2.13817	0.957733	0.338421	0.560842	2	0	1	1	0	0	1	1
ENSG00000137270.11	GCM1	1.06846	-2.09617	0.812104	0.37728	0.601635	3	0	1	0	0	0	1	1
ENSG00000213842.2	SUGT1P2	1.06776	-1.3926	2.33224	0.141	0.321574	4	3	2	7	4	1	4	0
ENSG00000234832.1	NXT1-AS1	1.06729	-2.31869	0.907613	0.352741	0.576147	1	2	0	1	0	0	1	1
ENSG00000241357.1	RP11-758P17.2	1.06728	-2.31864	0.903462	0.353819	0.577249	1	1	0	2	1	0	0	1
ENSG00000149573.9	MPZL2	1.06719	-2.27131	0.83274	0.371395	0.595549	2	2	0	0	0	0	1	1
ENSG00000279029.1	RP11-144I2.1	1.06718	-2.27137	0.929624	0.345462	0.568386	2	1	0	1	1	0	0	1
ENSG00000232757.1	ETF1P1	1.06717	-2.18109	0.975738	0.334016	0.556091	2	1	0	1	1	0	0	1
ENSG00000228817.4	BACH1-IT2	1.06716	-2.13805	1.06291	0.313777	0.535469	2	1	0	1	1	0	0	1
ENSG00000214027.3	ARPC3P5	1.06696	-1.5531	1.16999	0.291143	0.512741	5	0	6	0	4	1	0	1
ENSG00000215023.2	AC114730.5	1.06695	-2.05556	0.897442	0.353781	0.577229	0	1	1	2	0	0	1	1
ENSG00000251298.1	RP11-425A23.1	1.06687	-2.13799	1.05607	0.315304	0.53652	1	1	1	1	0	0	1	1
ENSG00000271638.1	BNIP3P19	1.06677	-2.13818	0.956174	0.338806	0.561244	2	1	1	0	0	0	1	1
ENSG00000240132.1	ETF1P2	1.06669	-0.157334	9.43243	0.0055974	0.0284025	11	14	13	15	7	7	10	6
ENSG00000185523.6	SPATA45	1.06657	-2.18105	0.790066	0.383716	0.608047	0	0	2	2	0	0	1	1
ENSG00000171657.6	GPR82	1.06656	-1.58148	2.03909	0.167374	0.36081	1	2	5	3	2	2	2	0
ENSG00000050628.20	PTGER3	1.06649	-2.27141	0.9319	0.344885	0.567766	1	0	2	1	0	0	1	1
ENSG00000259250.1	RP11-50C13.1	1.06639	-2.22552	0.83794	0.369933	0.594511	2	0	2	0	0	0	1	1
ENSG00000239332.6	LINC01119	1.06611	-0.416718	5.62089	0.0269496	0.0968081	5	9	15	10	4	2	8	8
ENSG00000225369.1	CAPZA1P2	1.06592	-1.86764	0.739614	0.399079	0.622876	1	0	0	3	1	1	0	0
ENSG00000184361.13	SPATA32	1.06584	-2.13814	0.950175	0.340294	0.56282	2	1	0	1	0	1	1	0
ENSG00000230525.6	LINC01799	1.06563	-2.22546	0.808177	0.378415	0.602867	0	0	1	3	0	1	1	0
ENSG00000233721.1	RP11-205K6.1	1.06563	-2.27125	0.802337	0.380113	0.604483	0	0	1	3	0	1	1	0
ENSG00000230832.3	SSBL4P	1.06556	-2.18119	0.798371	0.381272	0.605456	0	2	0	2	1	0	0	1
ENSG00000229870.1	RPL21P89	1.06547	-2.13806	0.943086	0.342065	0.564669	1	2	0	1	1	0	0	1
ENSG00000268163.1	AC004076.9	1.06545	-0.524247	3.2661	0.0844509	0.224659	1	10	3	16	6	3	6	2
ENSG00000267892.1	CTD-2540F13.2	1.06538	-2.31866	0.803737	0.381225	0.605456	2	2	0	0	1	0	0	1
ENSG00000258758.1	RP11-613G13.1	1.06517	-2.22565	0.939888	0.342867	0.565602	0	2	1	1	0	0	1	1
ENSG00000278107.1	RP11-162A12.4	1.06499	-2.09639	0.82125	0.374655	0.598691	2	1	1	0	1	0	0	1
ENSG00000186854.11	TRABD2A	1.0648	1.06595	12.2976	0.00199614	0.0123438	23	26	33	30	12	27	15	9
ENSG00000125780.12	TGM3	1.06479	-1.97762	1.03962	0.319017	0.540559	0	1	2	1	0	0	1	1
ENSG00000233682.3	RP11-13P5.2	1.06478	-2.01588	0.772057	0.389098	0.613488	0	0	2	2	1	0	0	1
ENSG00000198774.5	RASSF9	1.06477	-2.2255	0.834724	0.370836	0.595027	0	0	2	2	1	0	0	1
ENSG00000256262.1	USP30-AS1	1.0646	-2.05574	0.819162	0.375251	0.599333	2	0	2	0	1	0	0	1
ENSG00000178977.3	LINC00324	1.06436	-0.20103	6.24587	0.0204224	0.0783418	10	7	16	8	8	7	3	5
ENSG00000241120.1	HMGN1P8	1.06414	-2.18119	0.878586	0.358788	0.582207	1	2	0	1	0	1	1	0
ENSG00000266803.1	RP1-77H15.1	1.06412	-2.2713	0.919141	0.348141	0.571375	1	1	0	2	1	1	0	0
ENSG00000225526.6	MKRN2OS	1.06394	-1.36703	2.50882	0.127511	0.300023	3	3	5	7	2	2	3	3
ENSG00000231552.1	IGBP1P3	1.06376	-2.05549	1.02759	0.321767	0.543145	1	0	1	2	1	1	0	0
ENSG00000197446.9	CYP2F1	1.06374	-2.22557	1.04496	0.317804	0.539118	1	1	1	1	0	1	1	0
ENSG00000246323.2	RP11-325L7.1	1.06373	-2.27138	1.03823	0.319332	0.540832	1	1	1	1	0	1	1	0
ENSG00000249084.1	RP11-376O6.2	1.06363	-2.27133	0.920925	0.347683	0.570931	2	0	1	1	1	1	0	0
ENSG00000216809.1	RP11-57K17.1	1.06355	-2.18118	0.772542	0.388951	0.613348	3	0	1	0	1	1	0	0
ENSG00000155754.15	C2CD6	1.06342	-2.27127	0.825136	0.373548	0.597646	0	0	2	2	0	1	1	0
ENSG00000234788.1	HSPA8P3	1.06338	-2.18117	0.876094	0.359457	0.583054	0	2	1	1	1	0	0	1
ENSG00000241429.1	EEF1A1P25	1.06327	-2.2714	0.926644	0.346221	0.569222	1	2	1	0	1	0	0	1
ENSG00000263089.1	RP11-166P13.4	1.06303	-1.94002	0.814778	0.376509	0.600891	0	1	2	1	1	0	0	1
ENSG00000286755.1	RP11-643E20.1	1.063	-2.09629	1.04407	0.318006	0.539394	0	1	2	1	1	0	0	1
ENSG00000275038.2	RP11-546B8.6	1.06248	-0.510211	6.5407	0.0179723	0.0710195	8	9	10	5	5	5	5	3
ENSG00000285663.1	RP11-94P2.1	1.06242	-2.27139	0.808473	0.378329	0.602823	0	3	0	1	0	1	1	0
ENSG00000230734.1	RPL10P3	1.06199	-2.31863	0.894025	0.356288	0.579851	0	1	1	2	1	1	0	0
ENSG00000254907.1	RP11-484D2.2	1.06189	-0.701084	3.83506	0.0630182	0.180707	10	9	8	5	5	3	4	6
ENSG00000267203.1	SNRPGP4	1.06163	-2.22545	0.826757	0.373087	0.597138	0	0	2	2	1	1	0	0
ENSG00000212607.1	SNORA3B	1.0616	-2.31868	0.897998	0.355246	0.57886	0	1	2	1	0	1	1	0
ENSG00000254398.1	RP11-578F21.2	1.0616	-2.31868	0.897998	0.355246	0.57886	0	1	2	1	0	1	1	0
ENSG00000159450.12	TCHH	1.06159	-2.18116	0.769199	0.389962	0.614251	0	3	1	0	1	0	0	1
ENSG00000234303.3	CLYBL-AS1	1.06158	-2.22565	0.816192	0.376103	0.60042	0	3	1	0	1	0	0	1
ENSG00000126264.10	HCST	1.06152	-2.27125	0.909828	0.350546	0.573912	1	0	2	1	1	1	0	0
ENSG00000152669.9	CCNO	1.06106	-1.29462	2.64844	0.11792	0.28393	7	3	4	2	3	0	4	2
ENSG00000272991.1	AF129408.17	1.06064	-2.18123	0.689165	0.415386	0.638283	0	3	0	1	1	1	0	0
ENSG00000233337.1	UBE2FP3	1.06063	-1.13708	2.84221	0.10598	0.263689	4	4	1	9	1	3	3	3
ENSG00000156463.18	SH3RF2	1.06046	-1.6105	1.51508	0.231391	0.447176	0	1	7	3	1	1	2	2
ENSG00000277501.1	RP11-697E22.2	1.06032	-2.01612	1.04935	0.316813	0.538096	0	2	1	1	1	1	0	0
ENSG00000224566.2	FAM96AP2	1.06022	-2.27131	0.799513	0.380938	0.605237	0	3	1	0	0	1	1	0
ENSG00000226493.1	RPL26P27	1.06022	-2.27131	0.799513	0.380938	0.605237	0	3	1	0	0	1	1	0
ENSG00000225213.2	RP11-197M22.2	1.0599	-2.09626	0.921752	0.347471	0.570687	0	1	2	1	1	1	0	0
ENSG00000287870.1	RP11-363H12.3	1.05974	-2.22548	0.916618	0.34879	0.571918	1	1	2	0	1	1	0	0
ENSG00000271778.1	RP11-379F4.8	1.05972	-2.27138	0.919108	0.348149	0.571375	1	1	2	0	1	1	0	0
ENSG00000244733.5	RP11-506M13.3	1.0597	-1.58119	1.6906	0.207008	0.41507	3	4	1	3	2	3	1	0
ENSG00000231845.3	HMGB3P14	1.05941	-2.09635	0.720299	0.405206	0.629241	1	0	3	0	1	1	0	0
ENSG00000286147.1	AC003099.2	1.05937	-2.18121	0.846576	0.367523	0.591529	1	0	3	0	1	1	0	0
ENSG00000226783.1	TLK1P1	1.0578	-1.31868	1.82872	0.190046	0.391795	0	7	3	6	4	0	3	2
ENSG00000262497.1	FAM187B2P	1.05743	-2.22535	0.722523	0.404493	0.628593	3	1	0	0	0	0	0	2
ENSG00000227155.7	RP11-165F24.3	1.05731	-2.22526	0.660534	0.425098	0.646533	0	0	1	3	0	0	0	2
ENSG00000231253.2	LINC01640	1.05705	-2.31852	0.78255	0.387447	0.611998	2	0	1	1	0	0	0	2
ENSG00000268723.1	CTC-444N24.9	1.05659	-1.34238	2.08722	0.162659	0.353555	2	6	4	6	4	4	1	1
ENSG00000188389.11	PDCD1	1.05573	-2.22547	0.747134	0.396732	0.620678	2	2	0	0	0	0	0	2
ENSG00000254556.1	AF131215.4	1.05555	-2.18101	0.853045	0.365733	0.589745	0	1	1	2	0	0	0	2
ENSG00000273102.1	AP000569.9	1.05555	-2.1811	0.780045	0.386697	0.611126	0	1	1	2	0	0	0	2
ENSG00000235018.1	RP11-11M20.2	1.05446	-2.22538	0.812809	0.377076	0.601584	1	1	0	2	0	1	0	1
ENSG00000287683.1	RP11-64I5.2	1.05436	-2.22521	0.800626	0.380612	0.604998	2	1	0	1	0	1	0	1
ENSG00000236048.2	SSBL5P	1.05412	-0.850005	5.02939	0.0353476	0.118589	7	7	7	7	8	2	4	2
ENSG00000175164.16	ABO	1.05411	-2.18083	0.837754	0.369985	0.594523	1	0	1	2	0	1	0	1
ENSG00000260036.1	RP11-178D12.2	1.0534	-1.24769	2.87289	0.104223	0.260675	3	3	4	6	2	1	4	2
ENSG00000213519.2	AC132008.1	1.05323	-1.79867	1.22225	0.280888	0.503062	5	0	3	3	0	0	1	5
ENSG00000256274.1	TAS2R64P	1.05312	-1.49726	1.85192	0.187369	0.388271	4	5	1	1	2	2	0	2
ENSG00000158122.12	PRXL2C	1.05263	1.72527	22.506	9.86004e-05	0.00111237	44	50	45	51	22	37	23	26
ENSG00000278909.1	RP11-401P9.7	1.05241	-2.0962	1.01616	0.324415	0.545948	1	1	1	1	0	1	0	1
ENSG00000257545.5	RP11-144F15.1	1.05239	-1.24784	2.94364	0.100298	0.254165	5	2	3	6	5	1	1	2
ENSG00000170927.15	PKHD1	1.05226	-2.22544	1.01245	0.325278	0.546705	1	1	1	1	0	1	0	1
ENSG00000249116.1	IRX4-AS1	1.0522	-2.2712	1.00115	0.327934	0.549135	1	1	1	1	0	1	0	1
ENSG00000213312.3	RPL7AP34	1.05211	-2.2712	0.893306	0.35487	0.578516	2	1	1	0	0	1	0	1
ENSG00000134256.13	CD101	1.05207	-0.455875	5.36055	0.0303335	0.105966	13	6	11	10	9	3	7	4
ENSG00000164342.13	TLR3	1.05158	-2.18096	0.701215	0.4114	0.634578	0	2	2	0	0	0	0	2
ENSG00000270068.1	RP4-761J14.9	1.05126	-2.18081	0.756055	0.393974	0.61811	2	1	0	1	0	2	0	0
ENSG00000235400.1	RP4-641G12.4	1.05125	-1.34232	2.51065	0.12738	0.299824	8	5	1	2	4	2	2	1
ENSG00000212695.5	RP11-134K1.2	1.05086	-2.18098	0.766018	0.390927	0.615283	2	0	1	1	0	2	0	0
ENSG00000256980.5	KHDC1L	1.05077	-2.05556	0.831092	0.37186	0.596029	0	2	1	1	0	1	0	1
ENSG00000231671.1	LINC01307	1.05053	-2.18109	0.851858	0.366061	0.590101	1	2	1	0	0	1	0	1
ENSG00000275826.1	RP11-756P10.7	1.05024	-2.09621	0.873431	0.360174	0.583828	1	1	2	0	0	1	0	1
ENSG00000249474.1	RP11-49I4.3	1.04924	-2.05513	0.671456	0.421352	0.64341	2	1	1	0	0	2	0	0
ENSG00000260122.1	RP11-923I11.3	1.04921	-1.76565	0.708067	0.409159	0.632933	0	1	0	8	0	0	4	1
ENSG00000064218.5	DMRT3	1.04893	-2.27116	0.799344	0.380987	0.605281	2	1	1	0	0	2	0	0
ENSG00000285778.2	RP11-275A6.1	1.04889	-1.41804	1.6546	0.211735	0.421809	3	4	6	3	0	3	6	0
ENSG00000080709.16	KCNN2	1.04797	-0.552658	4.59433	0.0434136	0.137976	7	15	6	5	8	3	7	1
ENSG00000267748.4	CTB-102L5.4	1.0475	-2.27128	0.685896	0.416477	0.639251	0	0	4	0	0	1	0	1
ENSG00000231093.1	TRMT1P1	1.04731	-2.27118	0.798502	0.381234	0.605456	0	2	1	1	0	2	0	0
ENSG00000230662.1	TNPO1P2	1.04415	-1.15845	2.52696	0.126215	0.297845	4	2	4	6	2	3	3	1
ENSG00000230359.5	TPI1P2	1.04331	0.346859	9.75691	0.00495286	0.025726	15	16	10	18	6	9	13	6
ENSG00000273523.1	RP11-248G5.9	1.0421	-0.0343202	8.56716	0.00781736	0.0372023	11	15	13	13	11	4	7	8
ENSG00000164691.18	TAGAP	1.03993	-1.7995	1.14666	0.295881	0.517497	0	1	5	3	1	0	3	1
ENSG00000250634.6	LINC01182	1.03932	-1.79927	1.59995	0.219173	0.431667	1	4	2	2	2	0	2	1
ENSG00000185352.9	HS6ST3	1.03847	-1.76634	1.3303	0.261155	0.483132	0	3	4	2	1	0	3	1
ENSG00000128655.18	PDE11A	1.03781	-0.90228	3.33939	0.0812659	0.218093	6	4	5	8	2	6	3	2
ENSG00000259635.1	AC100830.3	1.03686	0.143516	8.16569	0.00916523	0.0421144	16	11	9	21	6	9	12	6
ENSG00000229415.10	SFTA3	1.03637	-1.83314	1.5924	0.220227	0.432898	2	2	4	1	2	1	2	0
ENSG00000255220.1	DDX18P5	1.03561	-1.31796	3.03726	0.0953659	0.245304	3	6	4	3	2	2	2	3
ENSG00000115648.14	MLPH	1.03545	-1.83324	1.0783	0.310381	0.531771	2	0	6	1	4	0	0	1
ENSG00000118946.12	PCDH17	1.03486	3.28709	56.212	1.72687e-07	9.73574e-06	112	155	125	140	82	79	90	59
ENSG00000171428.15	NAT1	1.03417	-0.748586	2.64683	0.118026	0.284086	4	7	10	4	1	9	2	2
ENSG00000232983.2	RP11-296L22.7	1.03413	-1.76578	1.52736	0.229571	0.445013	3	2	1	3	2	0	1	2
ENSG00000159708.18	LRRC36	1.03282	-1.13694	3.21062	0.086958	0.229345	6	3	4	8	3	2	3	4
ENSG00000272518.1	RP11-26J3.3	1.03228	-1.27051	2.27493	0.145739	0.329092	6	4	3	3	0	3	3	3
ENSG00000182795.13	C1orf116	1.03191	-1.70175	1.25734	0.274272	0.496126	0	1	4	4	1	0	2	2
ENSG00000272551.1	RP11-324L17.1	1.03088	-1.6703	1.12136	0.301138	0.522599	2	2	2	3	3	0	0	2
ENSG00000197322.4	C17orf102	1.03082	-1.41797	1.08016	0.309975	0.531409	6	1	2	0	0	2	3	0
ENSG00000188985.6	DHFRP1	1.03066	3.09093	64.7531	5.43976e-08	4.7179e-06	131	112	113	124	71	70	74	65
ENSG00000280327.1	LA16c-313F4.1	1.03038	-1.09525	2.09964	0.161469	0.351935	0	5	6	5	1	2	2	4
ENSG00000184507.16	NUTM1	1.03031	-1.94003	1.3378	0.259854	0.481627	2	4	1	2	3	0	0	2
[truncated: 25,686 more rows]

## Sheet: DEGsq001n2390
ensembl_ID	gene_ID	logFC	logCPM	F	PValue	FDR	BA5_1	BA5_2	BA5_3	BA5_4	UninfectedControl1	UninfectedControl2	UninfectedControl3	UninfectedControl4
ENSG00000258377.1	RP11-649E7.5	8.75754	0.783094	39.3917	5.07656e-06	0.000111721	51	44	33	68	0	0	0	0
ENSG00000260107.1	AC005606.15	7.57511	-0.372642	50.8931	8.92438e-07	3.1434e-05	36	16	11	23	0	0	0	0
ENSG00000213147.3	RPL23AP60	6.81582	-0.846488	27.607	4.55573e-05	0.000604049	16	15	20	0	0	0	0	0
ENSG00000285508.1	RP5-931K24.3	6.74645	0.892394	82.6646	6.75152e-09	1.33511e-06	16	52	48	23	0	1	0	0
ENSG00000201098.1	RNY1	4.93973	-1.11388	33.0132	8.91909e-06	0.000173646	6	11	5	17	0	0	1	0
ENSG00000277918.1	RNVU1-28	4.7745	-1.20023	28.505	2.34362e-05	0.000361868	4	11	5	15	0	1	0	0
ENSG00000222328.1	RNU2-2P	4.70017	0.806487	36.3554	4.58989e-06	0.000103478	18	24	19	123	1	2	4	1
ENSG00000206585.1	RNVU1-7	4.41028	3.24893	65.277	1.47268e-07	8.71176e-06	283	334	153	499	0	58	12	0
ENSG00000255073.8	ZFP91-CNTF	3.86481	-0.730163	28.3007	2.45368e-05	0.000373653	8	18	24	5	0	1	3	0
ENSG00000202538.1	RNU4-2	3.77477	0.700435	67.0724	4.05542e-08	3.78976e-06	34	37	21	85	5	4	3	3
ENSG00000200795.1	RNU4-1	3.29361	-0.533718	24.0266	6.72385e-05	0.00082238	9	13	12	28	1	4	0	2
ENSG00000129167.10	TPH1	3.13807	-0.0928688	43.047	1.3563e-06	4.21072e-05	16	14	12	13	2	0	2	3
ENSG00000206588.1	RNU1-28P	3.13713	2.02419	36.4701	4.48968e-06	0.000102132	52	61	57	207	16	7	12	16
ENSG00000206596.1	RNU1-27P	3.13713	2.02419	36.4701	4.48968e-06	0.000102132	52	61	57	207	16	7	12	16
ENSG00000206652.1	RNU1-1	3.13713	2.02419	36.4701	4.48968e-06	0.000102132	52	61	57	207	16	7	12	16
ENSG00000206737.1	RNVU1-18	3.13713	2.02419	36.4701	4.48968e-06	0.000102132	52	61	57	207	16	7	12	16
ENSG00000207005.1	RNU1-2	3.13713	2.02419	36.4701	4.48968e-06	0.000102132	52	61	57	207	16	7	12	16
ENSG00000207389.1	RNU1-4	3.13713	2.02419	36.4701	4.48968e-06	0.000102132	52	61	57	207	16	7	12	16
ENSG00000207513.1	RNU1-3	3.13713	2.02419	36.4701	4.48968e-06	0.000102132	52	61	57	207	16	7	12	16
ENSG00000273768.1	RNVU1-29	3.13713	2.02419	36.4701	4.48968e-06	0.000102132	52	61	57	207	16	7	12	16
ENSG00000285953.1	CTB-161K23.3	3.10399	1.70512	25.1205	5.14749e-05	0.00066655	113	70	28	71	4	34	0	0
ENSG00000163082.10	SGPP2	3.09527	2.00988	99.3981	1.30331e-09	5.63784e-07	65	64	65	104	6	12	9	14
ENSG00000281000.1	SNORD3D	2.94814	1.64757	23.8894	6.95638e-05	0.000845389	21	66	72	135	0	23	0	21
ENSG00000275215.1	RNA5-8SN3	2.86268	3.24801	40.5533	2.10274e-06	5.83311e-05	126	151	148	482	43	33	35	38
ENSG00000277739.1	5_8S_rRNA	2.86268	3.24801	40.5533	2.10274e-06	5.83311e-05	126	151	148	482	43	33	35	38
ENSG00000278189.1	RNA5-8SN1	2.86268	3.24801	40.5533	2.10274e-06	5.83311e-05	126	151	148	482	43	33	35	38
ENSG00000278233.1	RNA5-8SN2	2.86268	3.24801	40.5533	2.10274e-06	5.83311e-05	126	151	148	482	43	33	35	38
ENSG00000277209.1	RPPH1	2.64575	1.38319	37.0663	4.00546e-06	9.35791e-05	52	38	32	105	13	6	8	16
ENSG00000261490.1	RP11-448G15.3	2.21243	0.135761	31.7247	1.16536e-05	0.000211423	23	13	17	18	6	2	6	4
ENSG00000225437.6	PACRG-AS2	1.92523	0.836656	32.8938	9.14046e-06	0.000176961	30	25	20	32	3	13	9	8
ENSG00000286964.1	RP4-809E13.5	1.78383	1.0938	40.2247	2.23083e-06	6.07094e-05	36	38	32	22	12	14	13	5
ENSG00000225339.4	RP11-513I15.6	1.76853	5.15578	94.1941	2.11806e-09	7.33842e-07	566	735	456	702	180	173	323	191
ENSG00000186594.14	MIR22HG	1.63459	2.07517	77.8106	1.14396e-08	1.76323e-06	59	56	72	51	20	24	27	20
ENSG00000257176.3	RP11-996F15.2	1.56116	0.6858	30.3508	1.5615e-05	0.000264728	24	32	23	32	16	8	15	6
ENSG00000253540.5	FAM86HP	1.52671	0.667519	25.3866	4.82841e-05	0.000632928	20	24	22	33	12	9	15	5
ENSG00000151773.13	CCDC122	1.46022	0.784661	28.5509	2.31965e-05	0.000359729	20	29	35	27	12	10	17	9
ENSG00000156968.9	MPV17L	1.45636	1.61572	48.4462	5.55377e-07	2.19966e-05	41	53	60	44	22	19	28	17
ENSG00000104313.20	EYA1	1.42474	1.37731	38.6568	2.97124e-06	7.47808e-05	35	41	54	33	22	20	17	13
ENSG00000152192.8	POU4F1	1.42121	2.27764	43.0161	1.36355e-06	4.21315e-05	67	66	80	82	30	29	51	22
ENSG00000257354.2	RP11-631N16.2	1.41283	4.99914	224.576	5.19166e-13	7.18655e-09	496	444	486	536	208	186	287	202
ENSG00000175305.18	CCNE2	1.37747	2.86863	83.6272	6.09911e-09	1.26777e-06	100	133	109	136	50	55	62	52
ENSG00000261762.1	RP11-650L12.2	1.35069	1.32644	24.8206	5.53508e-05	0.000706495	30	44	38	38	21	13	18	18
ENSG00000166401.15	SERPINB8	1.31729	2.94836	69.1235	3.14792e-08	3.30649e-06	114	131	107	103	50	46	83	40
ENSG00000109063.15	MYH3	1.31275	1.29614	35.9416	4.97263e-06	0.00010987	42	40	35	37	16	17	27	14
ENSG00000159905.15	ZNF221	1.26478	1.18475	28.1908	2.51525e-05	0.000379637	33	30	33	35	12	12	24	17
ENSG00000269343.9	ZNF587B	1.2363	3.99822	147.493	3.24815e-11	1.12406e-07	219	207	236	228	112	106	131	102
ENSG00000128965.13	CHAC1	1.20329	2.95133	45.231	9.36816e-07	3.24351e-05	133	86	125	156	83	43	61	73
ENSG00000198464.14	ZNF480	1.15604	4.01055	95.6525	1.84455e-09	7.1398e-07	195	270	233	248	128	136	119	121
ENSG00000263934.5	SNORD3A	1.15277	3.76989	25.3943	4.81952e-05	0.000632063	168	179	180	400	144	109	125	121
ENSG00000189190.10	ZNF600	1.15142	1.86657	34.1935	7.02098e-06	0.000144089	46	57	46	49	29	28	27	22
ENSG00000138311.18	ZNF365	1.14492	1.71891	30.1402	1.6343e-05	0.000274005	41	41	52	45	20	27	27	22
ENSG00000125430.9	HS3ST3B1	1.08291	3.05471	41.9177	1.65063e-06	4.82011e-05	96	127	115	117	53	84	61	56
ENSG00000104722.14	NEFM	1.08074	6.84743	111.014	4.73734e-10	3.74723e-07	1513	1435	1989	1514	786	940	1146	762
ENSG00000159445.13	THEM4	1.07432	3.5268	92.7764	2.42688e-09	7.9045e-07	169	175	168	163	91	84	105	102
ENSG00000189057.11	FAM111B	1.0693	3.45576	57.3708	1.46556e-07	8.68821e-06	130	160	161	155	88	71	114	73
ENSG00000204792.2	LINC01291	1.06878	1.48871	25.3416	4.88083e-05	0.000637267	36	46	42	39	20	28	24	20
ENSG00000118946.12	PCDH17	1.03486	3.28709	56.212	1.72687e-07	9.73574e-06	112	155	125	140	82	79	90	59
ENSG00000188985.6	DHFRP1	1.03066	3.09093	64.7531	5.43976e-08	4.7179e-06	131	112	113	124	71	70	74	65
ENSG00000137872.17	SEMA6D	0.995876	4.08954	68.8602	3.25091e-08	3.30649e-06	189	254	261	227	123	138	167	128
ENSG00000105173.14	CCNE1	0.976757	2.41772	35.7935	5.11791e-06	0.000112541	66	76	89	70	48	35	58	42
ENSG00000065615.14	CYB5R4	0.971133	2.56606	31.7273	1.16471e-05	0.000211423	82	82	102	103	57	55	70	43
ENSG00000180787.6	ZFP3	0.947817	3.59394	60.456	9.57966e-08	6.5552e-06	167	164	175	174	91	91	145	95
ENSG00000122644.13	ARL4A	0.940366	6.54895	61.1437	8.7328e-08	6.2708e-06	1005	1454	1346	1323	820	937	854	564
ENSG00000104267.10	CA2	0.931532	4.14322	61.9045	7.88996e-08	5.91961e-06	181	247	267	269	138	160	166	137
ENSG00000008196.13	TFAP2B	0.920685	5.1067	27.3266	3.0623e-05	0.000444105	354	405	732	343	258	302	343	248
ENSG00000225630.1	MTND2P28	0.904513	5.79061	159.482	1.52695e-11	6.03911e-08	668	833	825	731	521	448	563	420
ENSG00000273270.1	RP11-212P7.2	0.899287	3.1321	55.9555	1.79132e-07	1.00483e-05	112	107	128	130	74	67	85	79
ENSG00000189050.16	RNFT1	0.892037	2.68903	29.9488	1.70367e-05	0.000282431	88	93	93	88	73	41	67	53
ENSG00000198855.7	FICD	0.887797	2.55378	38.5585	3.0259e-06	7.58117e-05	77	77	81	75	53	47	57	43
ENSG00000100664.11	EIF5	0.883472	8.03895	259.479	1.207e-13	3.34158e-09	3279	3713	3872	3672	2476	2177	2628	2127
ENSG00000126653.18	NSRP1	0.876527	5.44678	77.5746	1.17445e-08	1.77565e-06	683	626	601	615	337	449	472	376
ENSG00000281398.4	SNHG4	0.87131	3.29326	53.6294	2.51202e-07	1.23773e-05	119	150	139	132	88	80	111	74
ENSG00000196247.12	ZNF107	0.865447	3.95361	33.7799	7.63053e-06	0.000153414	161	234	232	229	194	104	159	108
ENSG00000180626.10	ZNF594	0.864081	3.91669	68.6764	3.32494e-08	3.3267e-06	214	259	211	226	167	131	156	143
ENSG00000162086.16	ZNF75A	0.859646	4.34328	76.4998	1.32493e-08	1.87147e-06	283	294	291	278	193	153	250	162
ENSG00000084073.10	ZMPSTE24	0.854197	3.60222	45.1908	9.4312e-07	3.25159e-05	130	169	218	178	132	111	113	102
ENSG00000270757.1	HSPE1-MOB4	0.848053	3.03794	28.2151	2.50147e-05	0.000378433	96	134	120	102	75	74	70	79
ENSG00000228253.1	MT-ATP8	0.844005	7.93412	122.295	1.92454e-10	2.91683e-07	3011	3476	3734	3497	2263	2250	2809	1815
ENSG00000143195.13	ILDR2	0.837051	4.90012	28.5549	2.31756e-05	0.000359729	281	382	525	309	204	286	297	207
ENSG00000258643.6	BCL2L2-PABPN1	0.835501	3.33319	42.4034	1.51626e-06	4.52835e-05	136	141	103	142	97	68	95	90
ENSG00000118412.13	CASP8AP2	0.834234	4.94912	76.8742	1.27025e-08	1.84037e-06	370	433	447	465	295	272	341	242
ENSG00000115993.13	TRAK2	0.826066	4.52359	75.4845	1.48661e-08	1.99848e-06	293	324	333	362	213	224	248	197
ENSG00000196922.10	ZNF252P	0.822207	3.87578	59.7174	1.05902e-07	7.00484e-06	193	224	200	198	131	141	131	144
ENSG00000114405.11	C3orf14	0.817413	2.66009	24.6853	5.7202e-05	0.000724446	69	81	103	86	72	58	63	37
ENSG00000124160.12	NCOA5	0.809999	5.22481	74.4668	1.6705e-08	2.15106e-06	446	428	584	497	312	294	406	320
ENSG00000137486.17	ARRB1	0.809911	2.87659	28.4801	2.35671e-05	0.000363283	105	75	106	98	71	56	75	60
ENSG00000177599.13	ZNF491	0.808336	2.59129	27.4605	2.96959e-05	0.000433809	95	84	92	78	53	51	75	59
ENSG00000188707.6	ZBED6CL	0.803337	2.91069	29.3894	1.92559e-05	0.000311389	105	92	99	88	66	45	88	65
ENSG00000143753.13	DEGS1	0.800691	4.70553	78.8777	1.01651e-08	1.61708e-06	308	343	416	362	269	212	288	213
ENSG00000141642.9	ELAC1	0.796678	3.10373	34.8346	6.17871e-06	0.000129983	106	92	129	120	72	75	79	80
ENSG00000172748.14	ZNF596	0.786594	3.65615	58.4842	1.25467e-07	7.82333e-06	172	191	159	172	137	108	130	106
ENSG00000196653.12	ZNF502	0.780337	4.32391	78.8272	1.02218e-08	1.61708e-06	257	261	257	263	174	181	198	167
ENSG00000214491.8	SEC14L6	0.777394	3.31022	26.6665	3.5678e-05	0.00049861	143	130	106	99	67	71	108	87
ENSG00000117155.17	SSX2IP	0.766765	4.01584	51.0016	3.72886e-07	1.61051e-05	184	236	245	238	161	146	198	130
ENSG00000171970.13	ZNF57	0.765483	3.38139	39.9302	2.35287e-06	6.31193e-05	146	153	137	148	115	109	109	77
ENSG00000156398.13	SFXN2	0.765217	3.09796	35.5937	5.32135e-06	0.000115637	111	107	138	119	87	71	109	68
ENSG00000144792.9	ZNF660	0.761446	3.65421	40.1249	2.27138e-06	6.16501e-05	159	196	182	168	131	122	136	107
ENSG00000135521.9	LTV1	0.760432	5.37877	74.0192	1.75912e-08	2.21111e-06	569	568	552	605	360	435	421	391
ENSG00000131019.11	ULBP3	0.759101	2.79936	29.3743	1.93198e-05	0.000311664	84	93	105	80	73	58	77	48
ENSG00000034693.15	PEX3	0.757245	3.47625	42.967	1.37514e-06	4.23762e-05	146	153	158	133	110	102	110	94
ENSG00000124279.12	FASTKD3	0.754785	3.18291	38.8171	2.88442e-06	7.30606e-05	122	117	139	127	109	82	95	72
ENSG00000233237.8	LINC00472	0.754094	3.70082	44.4072	1.07556e-06	3.62248e-05	164	209	162	180	126	109	154	118
ENSG00000180938.6	ZNF572	0.751482	3.20701	34.1453	7.08929e-06	0.000145176	102	138	128	129	114	80	88	71
ENSG00000122912.15	SLC25A16	0.751307	3.57513	39.7153	2.44653e-06	6.49207e-05	155	162	187	154	125	95	153	96
ENSG00000198727.2	MT-CYB	0.747247	10.0682	132.048	9.3371e-11	2.05203e-07	14716	13572	14547	13763	9761	8696	12340	9572
ENSG00000089195.15	TRMT6	0.746588	4.6862	87.801	3.96737e-09	1.0362e-06	339	384	384	353	250	250	283	253
ENSG00000062370.17	ZNF112	0.742299	3.54568	36.664	4.32549e-06	9.96267e-05	168	151	166	152	95	119	143	97
ENSG00000198521.12	ZNF43	0.741517	5.30119	55.6089	1.88264e-07	1.04242e-05	449	573	586	559	414	395	445	294
ENSG00000251562.8	MALAT1	0.739546	11.1753	60.2045	9.91141e-08	6.69262e-06	33321	31895	27833	41044	25933	22877	25022	22072
ENSG00000253230.9	MIR124-1HG	0.737058	3.51911	38.6262	2.98811e-06	7.50008e-05	152	128	168	149	109	84	121	114
ENSG00000113194.13	FAF2	0.736086	6.96596	118.934	2.49774e-10	3.01317e-07	1544	1706	1757	1674	1246	1183	1290	1060
ENSG00000171451.15	DSEL	0.734065	3.4647	23.5352	7.5981e-05	0.000903969	137	120	198	146	124	124	93	88
ENSG00000080839.12	RBL1	0.730954	3.52544	31.7652	1.15549e-05	0.000210974	132	164	178	150	110	100	124	114
ENSG00000264247.2	ZNF407-AS1	0.728553	4.03813	45.2241	9.37905e-07	3.24351e-05	195	228	224	222	154	153	173	145
ENSG00000188321.14	ZNF559	0.727322	4.47913	50.8953	3.7901e-07	1.62681e-05	267	303	323	292	243	194	259	162
ENSG00000171951.5	SCG2	0.727234	4.81591	55.5535	1.89772e-07	1.04867e-05	436	384	405	304	265	255	300	280
ENSG00000157168.20	NRG1	0.724493	3.32095	27.3174	3.06874e-05	0.000444807	98	116	159	127	86	96	100	78
ENSG00000277161.2	PIGW	0.724163	3.18	26.8455	3.42228e-05	0.000483515	95	156	110	122	98	76	92	83
ENSG00000170571.12	EMB	0.719945	2.96827	23.4888	7.68677e-05	0.000911383	93	133	107	93	79	78	84	67
ENSG00000204920.11	ZNF155	0.719657	3.9129	38.1454	3.2678e-06	8.06319e-05	187	228	210	171	119	145	172	139
ENSG00000101773.19	RBBP8	0.719294	4.92584	61.4547	8.37695e-08	6.16665e-06	388	439	397	459	288	334	322	271
ENSG00000164332.8	UBLCP1	0.717645	4.93301	55.0669	2.03581e-07	1.08151e-05	371	405	464	421	300	333	309	258
ENSG00000134982.17	APC	0.716525	5.17563	68.9677	3.20842e-08	3.30649e-06	417	508	528	525	374	368	365	325
ENSG00000164002.12	EXO5	0.712703	2.78755	24.5573	5.90166e-05	0.000743346	82	87	100	99	68	56	87	58
ENSG00000271303.2	SRXN1	0.706743	3.74011	42.1922	1.57317e-06	4.65811e-05	189	166	183	184	147	100	151	132
ENSG00000156374.16	PCGF6	0.70633	3.2681	40.9822	1.94752e-06	5.51865e-05	121	130	143	124	99	90	108	82
ENSG00000163319.11	MRPS18C	0.706003	4.20552	50.7477	3.87693e-07	1.64874e-05	223	263	288	250	213	169	224	146
ENSG00000067334.14	DNTTIP2	0.7053	6.4226	77.5313	1.18013e-08	1.77565e-06	1068	1181	1227	1193	841	930	945	691
ENSG00000122484.9	RPAP2	0.705122	4.06385	63.7788	6.16884e-08	5.12866e-06	232	239	251	253	187	160	195	172
ENSG00000055044.11	NOP58	0.69952	6.61754	95.1498	1.93421e-09	7.1398e-07	1275	1376	1391	1347	923	1040	1095	886
ENSG00000166199.13	ALKBH3	0.698268	4.05675	52.748	2.86334e-07	1.35276e-05	216	221	232	220	153	170	168	160
ENSG00000132334.17	PTPRE	0.69608	3.59674	33.1994	8.58563e-06	0.000168905	155	166	146	141	100	127	122	97
ENSG00000185515.15	BRCC3	0.695074	3.46783	31.24	1.29094e-05	0.00022866	131	180	155	151	95	114	141	104
ENSG00000123219.13	CENPK	0.692194	3.08715	24.4049	6.12589e-05	0.000762911	122	112	132	105	89	72	109	79
ENSG00000078237.7	TIGAR	0.688661	3.96008	28.2225	2.49729e-05	0.000378433	243	207	180	262	218	125	193	131
ENSG00000038427.16	VCAN	0.688297	8.05937	26.1752	4.00321e-05	0.000545417	3027	3526	4370	2764	2344	3070	2718	1906
ENSG00000197170.10	PSMD12	0.685741	5.6121	73.4683	1.87532e-08	2.27711e-06	563	698	659	673	514	486	517	405
ENSG00000139372.15	TDG	0.674277	5.20751	59.3212	1.11798e-07	7.21478e-06	414	531	531	500	404	375	390	307
ENSG00000185869.15	ZNF829	0.673922	3.02115	28.6746	2.25634e-05	0.000351742	106	90	119	106	85	69	96	66
ENSG00000213341.11	CHUK	0.673892	4.125	45.9995	8.24868e-07	2.95427e-05	237	269	241	229	196	185	179	168
ENSG00000141446.11	ESCO1	0.671311	4.70296	41.7816	1.69057e-06	4.90602e-05	290	395	374	361	306	264	267	226
ENSG00000213020.10	ZNF611	0.670958	3.46932	28.6744	2.25643e-05	0.000351742	135	134	142	162	114	105	133	79
ENSG00000225972.1	MTND1P23	0.670077	7.53424	67.855	3.67924e-08	3.56153e-06	2513	2470	2458	2231	1583	1652	2245	1773
ENSG00000160062.15	ZBTB8A	0.669691	3.45745	33.1651	8.6461e-06	0.000169644	126	144	164	153	101	97	140	103
ENSG00000000457.14	SCYL3	0.668313	3.74301	29.3594	1.93836e-05	0.000312179	202	179	176	152	113	135	143	139
ENSG00000137275.16	RIPK1	0.667824	4.19564	45.6072	8.80066e-07	3.11381e-05	276	236	237	232	193	154	214	178
ENSG00000136492.10	BRIP1	0.667734	3.33389	29.6411	1.82207e-05	0.000298485	125	118	151	166	104	100	111	105
ENSG00000111252.11	SH2B3	0.667447	3.25795	23.6672	7.35165e-05	0.000879181	143	130	116	127	113	76	128	74
ENSG00000279800.2	BCLAF1P2	0.665807	3.61167	28.6805	2.25335e-05	0.000351699	167	177	171	138	109	124	131	125
ENSG00000111371.16	SLC38A1	0.662201	7.05548	83.6771	6.0672e-09	1.26777e-06	1764	1892	1782	1998	1553	1207	1632	1244
ENSG00000197780.10	TAF13	0.658839	3.80493	28.9511	2.12154e-05	0.000335628	148	235	194	188	138	152	155	131
ENSG00000139618.17	BRCA2	0.658603	3.44737	31.2819	1.27951e-05	0.00022751	135	171	139	166	122	112	127	101
ENSG00000198538.11	ZNF28	0.657488	3.92303	37.3624	3.78647e-06	9.00587e-05	177	226	192	218	138	149	188	140
ENSG00000189164.15	ZNF527	0.656049	3.30343	31.7954	1.14819e-05	0.000209958	119	146	128	147	110	87	107	105
ENSG00000090612.22	ZNF268	0.654558	5.80464	76.8746	1.2702e-08	1.84037e-06	701	748	719	780	556	575	551	542
ENSG00000198840.2	MT-ND3	0.654471	8.18099	108.756	5.72593e-10	3.88017e-07	3472	4139	3996	3755	3271	2596	3354	2473
ENSG00000048544.6	MRPS10	0.654288	4.41498	55.725	1.85152e-07	1.0293e-05	245	291	296	282	233	204	239	170
ENSG00000104112.9	SCG3	0.651284	4.32826	38.4327	3.09743e-06	7.71065e-05	267	239	341	240	213	208	218	185
ENSG00000029363.17	BCLAF1	0.649342	7.59863	105.035	7.88306e-10	4.31913e-07	2488	2586	2730	2596	2088	1924	2051	1831
ENSG00000174173.7	TRMT10C	0.648147	4.55747	60.374	9.68649e-08	6.60519e-06	291	320	340	321	254	245	255	213
ENSG00000181938.14	GINS3	0.647682	3.81769	38.0763	3.31033e-06	8.13911e-05	193	175	201	164	135	122	179	124
ENSG00000116918.15	TSNAX	0.646857	5.15807	61.148	8.72773e-08	6.2708e-06	458	467	472	468	333	377	362	342
ENSG00000089048.15	ESF1	0.646713	5.66787	37.9707	3.37641e-06	8.24304e-05	675	754	669	699	436	610	615	459
ENSG00000104047.15	DTWD1	0.644053	4.26031	23.2737	8.11332e-05	0.000952171	212	243	282	320	265	180	210	156
ENSG00000188295.15	ZNF669	0.643547	3.85856	29.9004	1.72172e-05	0.000285082	155	195	187	183	123	142	174	111
ENSG00000132872.12	SYT4	0.639918	3.4221	24.3079	6.27346e-05	0.00077779	153	142	140	136	115	85	144	96
ENSG00000178150.10	ZNF114	0.639916	3.03363	24.8785	5.45784e-05	0.000699863	92	103	99	101	86	63	69	84
ENSG00000009724.17	MASP2	0.637121	3.50247	23.929	6.88833e-05	0.000839733	164	141	122	182	136	89	133	112
ENSG00000198888.2	MT-ND1	0.636696	10.1752	106.149	7.15673e-10	4.04355e-07	15434	14074	15194	13718	10996	9594	13281	11061
ENSG00000269837.1	IPO5P1	0.636413	3.63719	33.5023	8.072e-06	0.000159967	184	160	153	183	151	112	144	117
ENSG00000124383.9	MPHOSPH10	0.63501	5.64242	52.5164	2.96433e-07	1.38394e-05	676	680	659	674	524	587	506	438
ENSG00000197124.12	ZNF682	0.634936	5.03162	52.4452	2.99618e-07	1.3848e-05	402	500	435	424	353	361	357	279
ENSG00000204569.10	PPP1R10	0.632343	6.83872	77.47	1.18823e-08	1.77818e-06	1515	1309	1496	1665	1249	957	1337	1088
ENSG00000032742.18	IFT88	0.630187	3.68517	29.6075	1.83553e-05	0.000299981	150	194	183	172	123	146	150	118
ENSG00000028116.18	VRK2	0.628804	3.65445	24.3957	6.13972e-05	0.000763947	131	205	177	150	146	119	151	97
ENSG00000175105.8	ZNF654	0.625824	3.86469	30.3449	1.56349e-05	0.000264741	171	219	215	224	207	138	160	138
ENSG00000178163.8	ZNF518B	0.625252	5.40732	70.5957	2.6339e-08	2.91497e-06	517	571	622	537	430	415	485	406
ENSG00000094804.12	CDC6	0.624583	3.95739	28.4075	2.39546e-05	0.000367822	222	175	246	189	145	161	189	148
ENSG00000226200.7	SGMS1-AS1	0.624479	3.16574	23.185	8.29658e-05	0.000968756	116	117	124	127	116	83	101	76
ENSG00000183354.12	KIAA2026	0.620813	4.92508	49.7539	4.52133e-07	1.86255e-05	350	462	415	422	364	283	366	271
ENSG00000180263.14	FGD6	0.619403	3.71756	28.8737	2.15836e-05	0.000339899	144	183	198	174	152	95	157	141
ENSG00000125285.6	SOX21	0.613318	7.24557	66.2807	4.47911e-08	4.07908e-06	1538	1688	1842	1749	1430	1034	1695	1201
ENSG00000168806.8	LCMT2	0.613024	3.63919	29.748	1.77993e-05	0.000292274	145	148	171	182	132	106	155	113
ENSG00000092853.14	CLSPN	0.608409	4.3821	42.7557	1.4263e-06	4.34101e-05	277	282	306	253	215	190	238	231
ENSG00000159593.15	NAE1	0.606694	5.46827	35.1426	5.81387e-06	0.000124045	442	631	646	596	545	433	488	352
ENSG00000105849.6	POLR1F	0.606682	4.75051	31.7263	1.16497e-05	0.000211423	310	373	416	339	316	297	260	249
ENSG00000124120.11	TTPAL	0.606447	4.62501	57.266	1.4873e-07	8.76084e-06	298	313	343	346	279	217	291	235
ENSG00000277586.4	NEFL	0.60573	6.94162	62.6325	7.16601e-08	5.58848e-06	1479	1580	1783	1507	1294	1248	1464	978
ENSG00000105939.14	ZC3HAV1	0.604282	3.66922	27.1223	3.20981e-05	0.000460331	165	202	168	153	125	133	143	137
ENSG00000132434.10	LANCL2	0.604256	4.81083	53.8547	2.42994e-07	1.21431e-05	339	364	406	377	284	280	336	266
ENSG00000171649.12	ZIK1	0.603417	4.9279	59.8512	1.03989e-07	6.91381e-06	406	383	358	401	300	277	328	310
ENSG00000164338.10	UTP15	0.603066	4.69383	53.9156	2.40829e-07	1.21225e-05	321	363	351	361	275	280	299	241
ENSG00000134294.14	SLC38A2	0.602052	5.52658	48.3331	5.65454e-07	2.22076e-05	551	610	630	700	598	394	550	429
ENSG00000177511.6	ST8SIA3	0.601339	3.70991	25.8197	4.35431e-05	0.000580959	164	154	190	148	126	100	156	135
ENSG00000182141.10	ZNF708	0.601176	4.50019	35.0211	5.9549e-06	0.000125752	250	290	319	338	273	208	275	190
ENSG00000169131.13	ZNF354A	0.600613	3.98635	28.5464	2.32196e-05	0.000359729	175	232	240	198	177	176	181	130
ENSG00000254635.6	WAC-AS1	0.600566	3.75045	23.8438	7.03561e-05	0.000851368	166	190	189	173	126	160	127	147
ENSG00000198000.12	NOL8	0.599886	5.97506	73.9227	1.77889e-08	2.21111e-06	798	881	802	860	622	661	722	618
ENSG00000091127.14	PUS7	0.595719	3.521	25.1216	5.14609e-05	0.00066655	157	147	191	146	120	109	158	120
ENSG00000267041.6	ZNF850	0.593536	3.38263	25.6302	4.55522e-05	0.000604049	128	155	125	137	99	93	127	112
ENSG00000198763.3	MT-ND2	0.593522	10.8814	101.733	1.05533e-09	4.87115e-07	23729	24677	25491	21540	18615	17354	21740	17738
ENSG00000158483.17	FAM86C1P	0.593061	3.00509	25.0178	5.27682e-05	0.000679483	102	103	109	114	89	71	94	85
ENSG00000183527.12	PSMG1	0.591441	4.65845	44.3471	1.08652e-06	3.64939e-05	305	347	339	328	266	255	310	215
ENSG00000083093.10	PALB2	0.590342	4.58521	48.3324	5.65517e-07	2.22076e-05	283	320	336	337	253	254	268	234
ENSG00000227640.3	SOX21-AS1	0.583591	5.29786	39.9597	2.34033e-06	6.29048e-05	423	488	424	531	415	311	441	327
ENSG00000146574.16	CCZ1B	0.58337	5.74912	62.3951	7.3938e-08	5.70188e-06	650	760	718	687	623	559	608	453
ENSG00000163104.18	SMARCAD1	0.582875	5.86833	37.1176	3.96654e-06	9.29049e-05	654	835	856	834	783	600	657	499
ENSG00000056050.7	HPF1	0.582165	4.10047	31.8859	1.12661e-05	0.000206695	177	250	223	238	195	166	200	148
ENSG00000275835.5	TUBGCP5	0.581608	4.76441	39.3231	2.62807e-06	6.83175e-05	309	402	374	363	282	283	335	254
ENSG00000118620.13	ZNF430	0.58148	3.60413	30.3875	1.54917e-05	0.000263445	134	182	164	158	135	120	143	111
ENSG00000067533.6	RRP15	0.581385	5.02665	49.0345	5.06051e-07	2.04851e-05	397	456	437	440	345	368	360	302
ENSG00000111358.14	GTF2H3	0.580186	5.26082	54.8311	2.10664e-07	1.10879e-05	432	549	493	521	396	369	441	385
ENSG00000212907.2	MT-ND4L	0.578828	8.59242	44.6531	1.03193e-06	3.50541e-05	4664	5347	5632	5094	4318	3646	5013	3654
ENSG00000169379.17	ARL13B	0.57781	3.5124	28.4638	2.36535e-05	0.000364218	157	162	140	155	125	114	147	106
ENSG00000185379.21	RAD51D	0.577201	3.84449	38.0222	3.34398e-06	8.19275e-05	173	202	195	185	166	138	171	130
ENSG00000047621.12	C12orf4	0.575022	4.11278	41.1438	1.89232e-06	5.38426e-05	205	260	240	231	193	175	202	179
ENSG00000152942.19	RAD17	0.574309	5.23428	51.1609	3.63916e-07	1.58221e-05	438	535	532	480	439	383	428	341
ENSG00000256229.8	ZNF486	0.571906	3.83062	30.2671	1.59001e-05	0.000268084	178	192	180	198	164	138	172	128
ENSG00000122687.19	MRM2	0.569907	5.34695	65.8952	4.70265e-08	4.25466e-06	493	495	556	527	414	396	467	387
ENSG00000128708.13	HAT1	0.566769	5.1122	35.5388	5.37877e-06	0.000116155	375	472	519	444	382	369	425	283
ENSG00000162607.13	USP1	0.566522	5.51819	35.6232	5.29072e-06	0.000115152	549	641	633	588	529	479	539	397
ENSG00000164073.11	MFSD8	0.566183	4.03544	27.8742	2.70212e-05	0.000402628	214	235	196	241	190	157	205	164
ENSG00000107614.22	TRDMT1	0.565843	4.36154	25.935	4.2369e-05	0.000569688	225	317	279	283	261	205	253	174
ENSG00000111845.5	PAK1IP1	0.56518	4.92432	36.8805	4.14996e-06	9.60632e-05	368	390	435	421	310	364	335	286
ENSG00000156256.15	USP16	0.564729	5.53941	39.9807	2.33141e-06	6.27872e-05	546	622	644	640	519	533	526	396
ENSG00000116741.8	RGS2	0.56146	4.08949	23.7991	7.1141e-05	0.00085744	196	265	219	184	190	171	186	151
ENSG00000258441.1	LINC00641	0.561177	6.19981	79.6431	9.34657e-09	1.54946e-06	892	980	1005	990	849	682	920	689
ENSG00000176261.16	ZBTB8OS	0.56095	4.14933	34.0464	7.23145e-06	0.00014742	226	236	234	219	169	183	214	173
ENSG00000107105.15	ELAVL2	0.560596	4.49731	33.6035	7.90795e-06	0.000157708	255	280	361	273	248	213	265	220
ENSG00000127989.14	MTERF1	0.559381	4.08125	27.8136	2.73962e-05	0.000406683	238	253	195	207	176	173	206	168
ENSG00000101608.13	MYL12A	0.556832	5.69887	62.7498	7.05629e-08	5.54232e-06	634	657	759	665	573	553	567	503
ENSG00000169981.11	ZNF35	0.556319	3.95477	31.9591	1.10948e-05	0.000204773	185	228	196	198	175	150	188	143
ENSG00000058729.11	RIOK2	0.556315	5.15529	35.6672	5.24547e-06	0.000114263	420	506	476	447	373	421	383	316
ENSG00000124541.7	RRP36	0.55593	4.93267	36.3977	4.55269e-06	0.000102807	403	416	397	374	302	305	387	297
ENSG00000162493.17	PDPN	0.553054	6.31526	35.1573	5.7971e-06	0.000123933	871	1025	1144	908	751	880	883	680
ENSG00000112312.10	GMNN	0.552707	4.48728	40.7963	2.01323e-06	5.64705e-05	262	317	294	298	239	242	259	211
ENSG00000005801.18	ZNF195	0.55001	5.97323	73.9124	1.78103e-08	2.21111e-06	830	849	805	862	704	654	749	620
ENSG00000101745.17	ANKRD12	0.549632	5.31713	39.6822	2.46127e-06	6.51437e-05	442	589	547	530	464	431	442	378
ENSG00000272398.6	CD24	0.549399	7.51608	31.6303	1.18872e-05	0.000214535	1948	2445	2571	2538	2415	1621	2250	1528
ENSG00000258289.10	CHURC1	0.547804	5.39101	53.6279	2.51256e-07	1.23773e-05	479	600	589	525	470	435	475	407
ENSG00000122257.20	RBBP6	0.547452	7.37678	81.2271	7.87186e-09	1.44132e-06	2154	2350	2251	2136	1866	1773	2024	1592
ENSG00000174718.12	RESF1	0.547185	4.85611	36.1286	4.79551e-06	0.000106809	325	403	382	418	328	294	351	276
ENSG00000115816.15	CEBPZ	0.546967	6.44637	44.1202	1.12903e-06	3.71666e-05	1051	1184	1162	1180	941	1044	964	771
ENSG00000090989.18	EXOC1	0.545236	6.01424	75.4445	1.49341e-08	1.99848e-06	807	890	865	842	767	651	726	639
ENSG00000198042.11	MAK16	0.545016	4.96193	42.7312	1.43236e-06	4.34337e-05	362	413	454	383	345	339	334	296
ENSG00000172172.8	MRPL13	0.544941	5.13144	29.1641	2.02372e-05	0.000323107	410	487	495	441	377	435	378	301
ENSG00000240225.10	ZNF542P	0.543135	5.03272	48.4853	5.51944e-07	2.1921e-05	430	454	444	404	342	351	397	326
ENSG00000124459.12	ZNF45	0.54301	3.94784	23.6801	7.32802e-05	0.000876734	204	211	206	183	138	165	197	157
ENSG00000125482.13	TTF1	0.542445	4.14756	24.7077	5.68903e-05	0.000721488	222	205	266	224	172	185	184	206
ENSG00000198431.16	TXNRD1	0.538786	6.63667	85.9723	4.78003e-09	1.17784e-06	1181	1353	1327	1319	1158	976	1152	972
ENSG00000138794.10	CASP6	0.53772	3.8837	29.5789	1.84704e-05	0.000301151	188	190	182	176	155	132	175	144
ENSG00000271122.1	HERPUD2-AS1	0.536786	3.78015	28.7939	2.19708e-05	0.000344234	167	182	167	190	146	122	171	143
ENSG00000138600.10	SPPL2A	0.536682	4.44831	28.9141	2.13907e-05	0.000337072	228	298	321	282	263	205	273	191
ENSG00000125686.12	MED1	0.53655	6.51034	82.8596	6.6134e-09	1.31721e-06	1164	1214	1252	1179	991	920	1153	896
ENSG00000067248.10	DHX29	0.536003	5.04077	46.1629	8.03003e-07	2.90224e-05	428	447	478	428	410	332	417	311
ENSG00000186446.12	ZNF501	0.535485	3.60768	24.4936	5.99433e-05	0.000752577	133	156	153	163	115	119	137	126
ENSG00000113597.18	TRAPPC13	0.534319	4.19748	31.5085	1.21964e-05	0.00021869	224	252	239	263	251	175	202	180
ENSG00000132842.14	AP3B1	0.533962	6.21064	59.8817	1.03558e-07	6.90845e-06	851	959	1070	987	823	770	900	694
ENSG00000166750.10	SLFN5	0.533177	3.72196	27.0043	3.29853e-05	0.000469513	175	179	181	171	164	150	151	117
ENSG00000154813.10	DPH3	0.532272	4.98821	38.8237	2.88094e-06	7.30392e-05	369	450	419	423	416	327	353	277
ENSG00000081386.13	ZNF510	0.531669	4.79964	40.6227	2.07677e-06	5.7959e-05	353	387	382	339	279	283	354	289
ENSG00000112237.13	CCNC	0.530557	4.75963	35.5097	5.40945e-06	0.000116636	303	379	372	356	309	284	324	248
ENSG00000146587.18	RBAK	0.527402	5.24842	45.2054	9.40822e-07	3.24771e-05	460	545	539	446	421	398	459	368
ENSG00000115738.10	ID2	0.52733	6.52782	55.4891	1.9154e-07	1.05015e-05	1017	1072	1240	1076	921	849	1103	782
ENSG00000219626.9	FAM228B	0.527045	3.2941	23.7112	7.27148e-05	0.000870722	120	134	130	134	105	103	113	107
ENSG00000196159.14	FAT4	0.525899	4.85843	30.7166	1.44333e-05	0.00024943	309	436	381	413	323	318	362	272
ENSG00000151725.12	CENPU	0.524639	4.61495	34.5683	6.51439e-06	0.000135806	296	306	345	319	241	270	302	235
ENSG00000133997.12	MED6	0.519879	4.80738	36.6316	4.35249e-06	0.000100165	330	403	376	313	297	294	303	285
ENSG00000132952.12	USPL1	0.519374	5.80749	54.539	2.19815e-07	1.13537e-05	711	736	773	771	764	561	626	545
ENSG00000136522.14	MRPL47	0.51755	5.2106	23.7395	7.2204e-05	0.000866103	422	514	503	472	334	460	418	368
ENSG00000177311.12	ZBTB38	0.517068	5.05759	33.1191	8.72784e-06	0.000170643	411	414	465	367	335	345	396	304
ENSG00000213297.8	ZNF625-ZNF20	0.516974	4.6861	25.0082	5.28901e-05	0.000680419	301	368	324	338	235	297	323	251
ENSG00000132773.12	TOE1	0.516825	4.20961	26.1627	4.01497e-05	0.000546482	218	199	257	245	188	169	210	199
ENSG00000172113.10	NME6	0.516271	4.5408	39.4916	2.54835e-06	6.66653e-05	284	313	284	305	256	202	276	257
ENSG00000172409.7	CLP1	0.516227	4.23639	26.8232	3.44001e-05	0.000485407	227	233	245	257	190	207	222	182
ENSG00000272994.1	C2orf49-DT	0.515411	4.48746	37.1397	3.94988e-06	9.26717e-05	298	284	266	295	230	224	279	222
ENSG00000135048.14	CEMIP2	0.514951	6.98319	24.1929	6.45351e-05	0.000796547	1401	1786	1648	1611	1176	1551	1500	1118
ENSG00000178966.17	RMI1	0.514744	4.07028	23.1461	8.3784e-05	0.000976436	180	226	237	216	188	175	218	138
ENSG00000010539.12	ZNF200	0.514661	4.22255	29.0473	2.07673e-05	0.000330612	193	248	267	235	212	188	220	168
ENSG00000228716.7	DHFR	0.513328	6.09317	40.2858	2.20637e-06	6.02995e-05	811	871	971	918	685	702	918	682
ENSG00000183474.16	GTF2H2C	0.512684	5.44288	55.7415	1.84712e-07	1.02893e-05	572	568	564	585	533	408	517	461
ENSG00000166454.10	ATMIN	0.512352	6.32684	57.9289	1.35539e-07	8.21091e-06	944	1051	1075	1009	901	855	925	728
ENSG00000170946.15	DNAJC24	0.510398	4.72886	33.4542	8.1513e-06	0.000161423	341	341	330	382	285	285	344	255
ENSG00000234420.7	ZNF37BP	0.507243	3.82871	23.5166	7.63354e-05	0.000907404	198	187	176	168	166	125	165	157
ENSG00000172785.18	CBWD1	0.507214	5.37553	31.5757	1.20246e-05	0.000216025	485	565	551	579	442	495	459	424
ENSG00000164305.19	CASP3	0.506672	5.81524	40.4656	2.13612e-06	5.90204e-05	737	791	742	621	681	615	596	530
ENSG00000146223.16	RPL7L1	0.506374	7.30281	70.3563	2.71086e-08	2.96641e-06	1885	2057	2100	2007	1663	1605	1892	1592
ENSG00000188171.16	ZNF626	0.503876	4.15288	26.0975	4.07723e-05	0.000552782	229	237	246	229	203	206	217	165
ENSG00000186448.15	ZNF197	0.503493	5.85638	59.0263	1.1642e-07	7.40942e-06	772	740	760	824	654	617	751	587
ENSG00000174469.23	CNTNAP2	0.50346	7.14062	41.8937	1.65757e-06	4.83052e-05	1578	2007	1801	1857	1626	1361	1876	1265
ENSG00000163788.14	SNRK	0.501644	3.99185	24.3254	6.24657e-05	0.000774805	184	214	233	201	204	148	202	150
ENSG00000259330.3	INAFM2	0.501523	4.63372	32.8408	9.24046e-06	0.000178522	290	314	327	345	295	248	323	214
ENSG00000166526.18	ZNF3	0.500776	6.21936	50.7997	3.84608e-07	1.63977e-05	888	908	1008	933	764	780	803	789
ENSG00000113643.9	RARS1	0.498555	6.08171	63.8173	6.13805e-08	5.12326e-06	874	928	899	858	761	749	827	665
ENSG00000226752.9	CUTALP	0.498195	4.42255	34.6245	6.44194e-06	0.0001346	252	298	284	281	265	221	263	195
ENSG00000070081.17	NUCB2	0.498007	4.9422	27.0371	3.27359e-05	0.000467644	362	428	455	354	329	368	349	298
ENSG00000167377.18	ZNF23	0.495936	4.96886	38.3314	3.15636e-06	7.83712e-05	408	436	396	402	356	341	375	316
ENSG00000066697.15	MSANTD3	0.494804	4.68817	39.2395	2.66868e-06	6.91137e-05	315	317	360	325	266	256	313	279
ENSG00000094975.14	SUCO	0.494403	6.34489	36.0909	4.83062e-06	0.000107246	1104	1172	978	1032	987	954	983	706
ENSG00000171295.13	ZNF440	0.494341	5.15939	37.7388	3.52674e-06	8.54225e-05	462	464	462	455	417	406	408	328
ENSG00000197044.11	ZNF441	0.49323	6.6457	34.5568	6.52939e-06	0.000136017	1142	1410	1386	1310	1175	1165	1214	888
ENSG00000073711.11	PPP2R3A	0.4932	3.94369	25.4637	4.74009e-05	0.000623121	189	201	202	194	166	174	169	155
ENSG00000135913.11	USP37	0.492816	4.51369	29.2689	1.9774e-05	0.000317359	313	307	305	300	294	244	274	228
ENSG00000198899.2	MT-ATP6	0.492339	10.5551	65.7877	4.7672e-08	4.2813e-06	18770	19279	20955	18098	16728	14385	20208	14374
ENSG00000153037.15	SRP19	0.492124	5.04231	23.3172	8.02489e-05	0.000943794	381	417	406	456	342	405	355	299
ENSG00000105926.16	MPP6	0.491307	4.26305	30.2314	1.60234e-05	0.000269998	228	272	238	247	236	185	219	197
ENSG00000197024.9	ZNF398	0.489548	4.11082	26.6446	3.58601e-05	0.000500824	235	209	228	185	188	168	196	176
ENSG00000162377.6	COA7	0.488845	4.3968	38.807	2.88981e-06	7.31302e-05	264	271	272	261	234	214	259	202
ENSG00000102738.8	MRPS31	0.488731	4.82761	28.393	2.40326e-05	0.000367942	354	398	360	331	276	319	355	274
ENSG00000150687.12	PRSS23	0.488249	6.37898	28.5403	2.32513e-05	0.000360018	888	961	1126	920	800	844	953	710
ENSG00000169139.12	UBE2V2	0.48808	5.72083	59.6095	1.07474e-07	7.03409e-06	635	717	708	667	634	544	616	526
ENSG00000122417.15	ODF2L	0.487306	4.05391	28.5355	2.32767e-05	0.00036021	206	226	221	222	204	182	178	179
ENSG00000213588.6	ZBTB9	0.487076	4.84976	46.5861	7.49242e-07	2.75103e-05	333	358	363	358	310	269	326	297
ENSG00000124193.16	SRSF6	0.487067	7.76321	84.522	5.55398e-09	1.20328e-06	2593	2710	2980	2754	2445	2124	2667	2172
ENSG00000112031.16	MTRF1L	0.487049	4.45643	24.2606	6.34685e-05	0.000785835	245	331	280	257	273	235	251	189
ENSG00000265808.4	SEC22B	0.486961	5.87475	44.0703	1.13864e-06	3.74384e-05	739	813	731	779	637	670	697	595
ENSG00000135801.10	TAF5L	0.486002	4.557	29.5213	1.87055e-05	0.000303909	273	305	333	271	253	261	266	224
ENSG00000115946.8	PNO1	0.485512	5.06992	42.8064	1.41383e-06	4.32508e-05	395	454	431	429	392	364	391	309
ENSG00000173875.14	ZNF791	0.485127	5.28402	41.6302	1.73624e-06	5.00708e-05	483	498	540	518	525	400	437	379
ENSG00000188994.13	ZNF292	0.485095	6.39322	44.2588	1.10285e-06	3.66536e-05	993	1077	1110	1148	1002	900	957	827
ENSG00000198732.11	SMOC1	0.483769	6.73498	24.4325	6.08467e-05	0.000758802	1150	1359	1426	1329	1083	1205	1362	840
ENSG00000142396.10	ERVK3-1	0.481587	5.55688	52.7681	2.85475e-07	1.35276e-05	580	609	666	617	590	473	589	466
ENSG00000186205.13	MTARC1	0.481452	4.07652	24.4825	6.01052e-05	0.000753288	208	228	216	212	172	183	207	175
ENSG00000110851.12	PRDM4	0.481195	7.0079	74.885	1.5921e-08	2.08897e-06	1574	1675	1688	1552	1411	1339	1502	1285
ENSG00000168813.17	ZNF507	0.478367	5.58488	47.2949	6.67806e-07	2.51199e-05	610	621	615	599	535	531	539	483
ENSG00000254004.7	ZNF260	0.478009	5.7155	41.912	1.65226e-06	4.82011e-05	619	737	756	670	604	596	620	555
ENSG00000116750.14	UCHL5	0.477597	4.83374	25.6245	4.56141e-05	0.000604512	308	387	364	407	354	298	357	251
ENSG00000083520.15	DIS3	0.477468	6.35799	53.1227	2.70782e-07	1.31289e-05	957	1082	1203	1053	1017	874	975	814
ENSG00000064313.12	TAF2	0.477081	5.06672	38.1316	3.27623e-06	8.07679e-05	396	505	437	444	411	347	420	351
ENSG00000132436.12	FIGNL1	0.476824	4.02244	24.9588	5.35258e-05	0.000687638	187	245	202	208	191	155	214	164
ENSG00000180530.11	NRIP1	0.475501	4.784	32.9851	8.97068e-06	0.00017434	333	347	428	351	326	282	344	300
ENSG00000172071.15	EIF2AK3	0.475311	5.7477	42.8812	1.39568e-06	4.28851e-05	734	726	661	679	658	609	627	508
ENSG00000278053.5	DDX52	0.475144	4.90385	27.7279	2.79361e-05	0.000413146	327	409	438	380	321	327	382	302
ENSG00000115875.19	SRSF7	0.474578	6.98217	80.3985	8.6088e-09	1.48959e-06	1560	1633	1634	1650	1464	1312	1506	1279
ENSG00000072849.11	DERL2	0.473949	5.84068	46.3064	7.84316e-07	2.84584e-05	653	782	806	669	684	565	711	545
ENSG00000159259.8	CHAF1B	0.473877	4.00993	24.3687	6.1805e-05	0.000768472	196	187	209	227	174	165	200	165
ENSG00000155097.12	ATP6V1C1	0.469974	5.09897	26.9801	3.31707e-05	0.000471665	402	421	476	473	430	382	410	306
ENSG00000272602.6	ZNF595	0.468791	4.29927	28.8478	2.17085e-05	0.000340897	278	254	245	247	237	213	244	190
ENSG00000132467.4	UTP3	0.468194	6.0348	42.424	1.51085e-06	4.51704e-05	836	804	849	857	701	753	775	648
ENSG00000164902.14	PHAX	0.465327	5.26677	37.9242	3.406e-06	8.30063e-05	451	498	510	483	407	427	430	407
ENSG00000092020.11	PPP2R3C	0.464647	4.76963	25.5415	4.65268e-05	0.00061367	269	379	355	343	287	291	326	258
ENSG00000135999.12	EPC2	0.464431	4.57184	32.4258	1.00673e-05	0.0001909	299	324	321	294	294	254	306	219
ENSG00000114744.9	COMMD2	0.463472	5.28439	33.0932	8.77414e-06	0.000171185	407	553	538	487	471	390	488	372
ENSG00000162385.11	MAGOH	0.463189	5.12177	29.4744	1.88992e-05	0.000306697	381	466	471	460	370	374	419	372
ENSG00000164134.13	NAA15	0.462417	6.01494	27.2231	3.13606e-05	0.000451647	750	896	933	841	897	697	731	638
ENSG00000256223.6	ZNF10	0.462114	4.51419	30.9284	1.3794e-05	0.000240484	265	307	316	303	301	225	285	224
ENSG00000188529.15	SRSF10	0.462057	7.25294	56.8581	1.57542e-07	9.09026e-06	1740	2047	2014	1956	1829	1563	1823	1508
ENSG00000140157.16	NIPA2	0.461976	4.89984	29.375	1.93172e-05	0.000311664	343	358	396	427	375	304	365	280
ENSG00000155755.19	TMEM237	0.461967	5.44323	35.3716	5.55792e-06	0.000119547	519	603	608	524	485	489	516	456
ENSG00000138035.15	PNPT1	0.461788	5.02599	26.9104	3.37109e-05	0.000477629	390	465	407	423	386	366	413	296
ENSG00000066654.14	THUMPD1	0.461116	6.01932	37.1771	3.92197e-06	9.21729e-05	783	832	915	832	855	725	736	598
ENSG00000166167.18	BTRC	0.460374	4.78854	29.0352	2.0823e-05	0.000331124	355	326	341	339	273	273	333	300
ENSG00000198393.8	ZNF26	0.46022	4.727	27.8801	2.69849e-05	0.000402519	333	336	335	365	315	317	303	250
ENSG00000177683.14	THAP5	0.459167	4.51701	25.8842	4.28822e-05	0.000574912	258	300	335	298	278	248	284	224
ENSG00000171617.15	ENC1	0.458968	7.24627	36.311	4.62937e-06	0.000104114	1556	1884	2106	1797	1462	1483	1888	1531
ENSG00000118200.14	CAMSAP2	0.458463	6.21457	44.3703	1.08227e-06	3.64065e-05	867	1064	1035	913	919	819	890	737
ENSG00000138385.16	SSB	0.458335	7.18742	30.9045	1.38648e-05	0.000241261	1731	2106	1958	1866	1646	1862	1711	1392
ENSG00000147654.15	EBAG9	0.457233	4.60986	29.6735	1.80916e-05	0.000296722	299	322	331	290	274	277	287	239
ENSG00000089876.12	DHX32	0.455292	5.43616	27.4586	2.97093e-05	0.000433809	519	627	508	530	451	488	548	411
ENSG00000113460.13	BRIX1	0.454481	5.33023	38.9257	2.82717e-06	7.23444e-05	489	523	529	531	481	456	482	384
ENSG00000055147.19	FAM114A2	0.452685	4.32464	26.2463	3.93672e-05	0.000537681	255	264	253	259	226	230	247	195
ENSG00000137574.11	TGS1	0.452472	5.17621	28.1889	2.51629e-05	0.000379637	424	484	469	472	390	433	426	357
ENSG00000042429.12	MED17	0.45108	5.47592	42.7402	1.43014e-06	4.34337e-05	565	608	553	591	545	497	555	427
ENSG00000145388.15	METTL14	0.451001	5.23595	35.5888	5.32641e-06	0.000115656	440	521	508	482	483	412	423	383
ENSG00000189180.16	ZNF33A	0.450772	5.04014	26.6759	3.55999e-05	0.000498021	399	492	410	432	429	315	420	354
ENSG00000198046.12	ZNF667	0.450195	3.97294	23.7156	7.26357e-05	0.000870242	204	224	203	194	183	167	195	175
ENSG00000146433.10	TMEM181	0.449693	5.06409	25.4323	4.77588e-05	0.000627231	391	478	444	423	381	401	402	328
ENSG00000140265.13	ZSCAN29	0.449091	5.92243	52.198	3.10957e-07	1.4136e-05	744	785	792	828	727	660	751	615
ENSG00000196214.11	ZNF766	0.448628	5.18151	32.3639	1.01973e-05	0.000192619	438	481	447	483	397	387	465	368
ENSG00000138381.10	ASNSD1	0.448305	5.15017	27.0087	3.29517e-05	0.000469513	404	455	509	428	463	375	407	327
ENSG00000072274.13	TFRC	0.448079	6.62711	54.2252	2.30131e-07	1.17549e-05	1215	1357	1238	1206	1219	1055	1120	989
ENSG00000137814.12	HAUS2	0.447775	4.88103	34.8072	6.21239e-06	0.000130493	352	407	369	376	338	320	341	314
ENSG00000125484.12	GTF3C4	0.447621	6.0806	52.8411	2.82384e-07	1.34643e-05	789	867	902	848	818	707	790	665
ENSG00000256087.7	ZNF432	0.447612	4.4614	23.051	8.58231e-05	0.00099496	290	310	259	285	227	238	270	263
ENSG00000198712.1	MT-CO2	0.447387	11.0551	60.4484	9.58951e-08	6.5552e-06	25348	26391	28046	24690	22322	21512	27037	20587
ENSG00000115446.12	UNC50	0.446538	5.54983	38.0581	3.32163e-06	8.15241e-05	629	621	549	599	575	509	584	436
ENSG00000196693.15	ZNF33B	0.445249	4.40035	24.3658	6.18492e-05	0.000768472	271	286	255	278	230	248	258	217
ENSG00000092439.16	TRPM7	0.444611	5.46028	30.7243	1.44097e-05	0.000249176	499	598	609	633	580	510	518	441
ENSG00000151835.17	SACS	0.443145	6.55352	35.7661	5.14531e-06	0.000113027	1081	1215	1287	1286	1170	1047	1118	935
ENSG00000122674.12	CCZ1	0.442684	4.61428	23.1454	8.38003e-05	0.000976436	291	329	338	288	312	253	251	275
ENSG00000138592.14	USP8	0.442477	5.81701	41.9487	1.64168e-06	4.80951e-05	714	791	783	667	656	614	719	603
ENSG00000122779.18	TRIM24	0.441993	6.95692	47.4881	6.47328e-07	2.45834e-05	1397	1691	1683	1589	1394	1344	1612	1235
ENSG00000166912.17	MTMR10	0.441769	4.61958	24.5821	5.86596e-05	0.000739859	276	358	323	307	328	250	278	255
ENSG00000204611.7	ZNF616	0.440971	4.91384	29.7884	1.7643e-05	0.000290223	372	371	390	420	340	314	407	307
ENSG00000004897.12	CDC27	0.440913	5.28805	32.3083	1.03159e-05	0.000194414	404	521	539	502	471	394	478	387
ENSG00000134444.15	RELCH	0.440359	5.16992	40.1152	2.27538e-06	6.16982e-05	473	456	484	460	442	379	453	375
ENSG00000152904.11	GGPS1	0.440345	4.93689	23.4029	7.85419e-05	0.000927427	334	413	399	423	379	349	372	280
ENSG00000133773.12	CCDC59	0.440281	4.92733	39.2062	2.68502e-06	6.94068e-05	376	407	405	396	371	340	369	312
ENSG00000060749.16	QSER1	0.440239	5.9025	31.9312	1.11597e-05	0.000205424	708	842	853	799	827	639	747	609
ENSG00000154822.18	PLCL2	0.440082	5.77266	28.9879	2.10428e-05	0.000333317	634	712	748	708	602	648	708	503
ENSG00000198040.11	ZNF84	0.439951	6.63402	41.4798	1.78295e-06	5.13643e-05	1289	1356	1237	1244	1062	1129	1183	1113
ENSG00000104131.13	EIF3J	0.439789	5.83892	24.0739	6.6458e-05	0.00081447	610	789	785	776	776	621	704	510
ENSG00000112081.17	SRSF3	0.437886	7.7578	47.1738	6.81005e-07	2.54092e-05	2404	2733	2958	2937	2736	2269	2661	2072
ENSG00000141378.15	PTRH2	0.437854	4.49421	26.2477	3.93541e-05	0.000537681	290	314	281	244	265	237	265	227
ENSG00000116717.13	GADD45A	0.436757	6.15999	32.9135	9.10352e-06	0.000176369	803	857	846	970	850	720	815	683
ENSG00000149289.11	ZC3H12C	0.435413	5.14287	31.6869	1.17465e-05	0.000212968	433	441	500	456	444	385	428	358
ENSG00000073712.15	FERMT2	0.43339	5.18423	23.9127	6.91622e-05	0.000841725	445	483	522	443	395	451	475	347
ENSG00000157212.19	PAXIP1	0.433121	4.39437	25.5876	4.60175e-05	0.000608984	249	255	264	274	221	211	285	206
ENSG00000169902.15	TPST1	0.432194	5.76153	25.3691	4.8487e-05	0.000634687	655	750	713	617	605	665	643	496
ENSG00000035403.18	VCL	0.430613	6.51024	50.8098	3.84017e-07	1.63977e-05	1060	1135	1291	1121	1056	918	1101	1000
ENSG00000136146.15	MED4	0.4304	5.60109	33.702	7.75177e-06	0.0001554	554	666	621	634	599	539	583	470
ENSG00000129292.21	PHF20L1	0.429837	5.99087	43.8015	1.19184e-06	3.87278e-05	785	874	851	819	785	737	765	656
ENSG00000134077.16	THUMPD3	0.429605	5.67279	42.2964	1.54482e-06	4.59369e-05	567	672	664	677	600	521	649	519
ENSG00000163918.12	RFC4	0.429182	5.31179	37.7682	3.50727e-06	8.50252e-05	484	529	516	530	458	439	483	441
ENSG00000067900.8	ROCK1	0.428835	6.14441	30.6585	1.46142e-05	0.000252398	787	999	948	918	790	853	861	719
ENSG00000256771.4	ZNF253	0.428704	4.85962	28.2204	2.49851e-05	0.000378433	327	372	385	395	355	307	336	312
ENSG00000112029.10	FBXO5	0.428686	4.71156	23.434	7.79316e-05	0.000921237	279	352	353	346	303	303	308	262
ENSG00000185222.10	TCEAL9	0.428081	5.63104	25.0961	5.1779e-05	0.000669094	641	727	592	593	518	586	594	554
ENSG00000172115.9	CYCS	0.427614	5.77177	37.8491	3.45431e-06	8.3962e-05	624	684	677	767	656	540	707	547
ENSG00000115963.14	RND3	0.42642	7.74839	42.2699	1.55195e-06	4.60513e-05	2325	2853	2888	2810	2514	2362	2672	2101
ENSG00000184635.16	ZNF93	0.426365	4.99755	25.8702	4.30252e-05	0.000576271	352	410	421	415	356	324	419	322
ENSG00000180376.17	CCDC66	0.425278	4.58595	26.3924	3.80395e-05	0.000524474	313	334	302	336	314	241	316	274
ENSG00000128191.16	DGCR8	0.425074	6.37448	32.8553	9.213e-06	0.000178116	1037	945	1026	1148	987	714	1077	935
ENSG00000116752.6	BCAS2	0.424836	5.28108	26.2775	3.90797e-05	0.00053534	432	515	501	521	465	433	505	350
ENSG00000197852.12	INKA2	0.424668	5.12801	35.9782	4.93736e-06	0.000109265	454	420	449	424	411	347	438	360
ENSG00000136560.14	TANK	0.424652	4.42054	24.7492	5.63188e-05	0.000716209	257	321	260	269	249	223	273	239
ENSG00000142556.19	ZNF614	0.424383	4.12964	24.2854	6.30831e-05	0.000781762	216	224	219	203	198	176	205	187
ENSG00000163714.18	U2SURP	0.423606	7.20575	45.8683	8.4289e-07	3.00714e-05	1750	2049	1925	1885	1760	1694	1742	1550
ENSG00000213551.7	DNAJC9	0.423514	5.4822	29.6241	1.82887e-05	0.000299069	508	544	621	574	465	460	551	518
ENSG00000171208.10	NETO2	0.421656	4.78286	29.372	1.93297e-05	0.000311664	320	355	372	316	315	282	355	264
ENSG00000110218.9	PANX1	0.42147	5.19011	25.8968	4.27539e-05	0.000574304	434	429	474	467	400	416	444	345
ENSG00000131437.16	KIF3A	0.421431	4.30514	24.7806	5.58913e-05	0.000711426	243	257	279	249	266	189	242	221
ENSG00000196652.12	ZKSCAN5	0.420477	5.2277	26.9438	3.34508e-05	0.00047443	455	507	457	431	403	403	441	398
ENSG00000167842.16	MIS12	0.420274	5.43768	31.7485	1.15955e-05	0.00021106	492	605	577	509	509	489	512	432
ENSG00000213762.12	ZNF134	0.419174	5.91831	41.737	1.70389e-06	4.92916e-05	737	742	734	764	669	655	695	631
ENSG00000126814.7	TRMT5	0.418898	4.95579	29.6306	1.82626e-05	0.000298818	371	443	405	373	361	348	388	322
ENSG00000198824.7	CHAMP1	0.41678	5.92502	47.6804	6.27618e-07	2.39663e-05	695	736	795	779	721	601	718	647
ENSG00000100503.26	NIN	0.416266	6.42694	42.6666	1.4485e-06	4.37315e-05	1102	1071	1202	1111	1024	928	1154	910
ENSG00000163811.12	WDR43	0.415956	6.25196	48.1674	5.80567e-07	2.26699e-05	1007	943	1009	966	911	814	954	831
ENSG00000037749.13	MFAP3	0.414735	5.19837	26.4048	3.79283e-05	0.000523877	443	490	484	482	464	389	510	344
ENSG00000116731.22	PRDM2	0.41469	6.12561	46.7032	7.35069e-07	2.70977e-05	842	938	909	857	801	752	917	706
ENSG00000083099.11	LYRM2	0.414118	5.75161	27.7013	2.81059e-05	0.000414992	556	688	769	673	604	572	660	565
ENSG00000170364.12	SETMAR	0.414062	4.21439	23.7635	7.17738e-05	0.000863188	231	220	243	219	215	195	226	182
ENSG00000137713.16	PPP2R1B	0.412986	4.97872	25.2325	5.01052e-05	0.000651862	345	432	417	375	371	332	378	324
ENSG00000122958.15	VPS26A	0.412684	5.25937	31.6445	1.18518e-05	0.000214316	433	522	481	501	461	420	452	401
ENSG00000078177.14	N4BP2	0.412527	5.49753	28.9995	2.0989e-05	0.000332997	575	572	537	581	542	454	542	494
ENSG00000112851.15	ERBIN	0.411715	6.54366	33.8149	7.5768e-06	0.000152555	1062	1221	1227	1197	1051	1065	1178	921
ENSG00000124201.15	ZNFX1	0.411697	4.84838	30.5889	1.48344e-05	0.000254928	356	357	341	352	338	264	350	312
ENSG00000103978.16	TMEM87A	0.41032	5.75719	31.7271	1.16477e-05	0.000211423	613	718	696	661	651	613	600	542
ENSG00000079785.16	DDX1	0.409809	6.7792	38.8486	2.86768e-06	7.29771e-05	1274	1403	1423	1412	1219	1274	1324	1116
ENSG00000214435.8	AS3MT	0.409736	5.11016	25.0794	5.19876e-05	0.000670795	408	470	499	413	416	358	448	386
ENSG00000145908.13	ZNF300	0.409544	5.42038	27.186	3.16303e-05	0.000454901	506	542	542	527	448	467	570	417
ENSG00000185246.18	PRPF39	0.408658	5.85635	29.4088	1.91737e-05	0.000310243	669	758	770	784	793	652	657	577
ENSG00000155438.12	NIFK	0.40816	5.71729	24.352	6.20587e-05	0.000770446	597	722	683	679	613	652	631	506
ENSG00000182957.16	SPATA13	0.407162	6.33982	39.922	2.35637e-06	6.31266e-05	987	989	1068	1020	980	734	1054	903
ENSG00000140299.13	BNIP2	0.40637	5.43031	24.6633	5.75098e-05	0.000728011	481	583	591	568	576	489	475	457
ENSG00000204130.14	RUFY2	0.406301	4.77727	25.3334	4.89051e-05	0.000638047	324	354	364	337	319	309	345	268
ENSG00000198604.11	BAZ1A	0.406062	6.00794	34.6463	6.41413e-06	0.00013412	834	885	820	831	753	780	844	653
ENSG00000198730.9	CTR9	0.404938	6.24888	35.6872	5.22506e-06	0.000114082	867	1026	1028	912	858	862	934	790
ENSG00000105821.15	DNAJC2	0.404756	5.13244	23.6387	7.404e-05	0.000884677	456	449	470	431	372	424	440	385
ENSG00000047188.16	YTHDC2	0.404346	5.35974	26.4639	3.74069e-05	0.000519319	475	538	533	573	529	421	526	439
ENSG00000186141.9	POLR3C	0.404149	4.84718	23.6161	7.44606e-05	0.000889319	341	377	373	362	292	320	365	329
ENSG00000153201.16	RANBP2	0.403525	7.14279	33.0259	8.89597e-06	0.000173318	1798	1949	1785	1937	1872	1614	1782	1474
ENSG00000100852.13	ARHGAP5	0.402228	7.00785	23.286	8.08826e-05	0.000950037	1433	1774	1670	1729	1714	1458	1499	1289
ENSG00000182973.19	CNOT10	0.401894	4.50757	23.0494	8.58573e-05	0.00099496	276	303	297	282	255	266	290	233
ENSG00000116489.13	CAPZA1	0.40184	6.9123	29.794	1.76215e-05	0.000290043	1333	1600	1588	1567	1464	1430	1473	1122
ENSG00000100104.13	SRRD	0.401216	4.63961	24.0437	6.69555e-05	0.000820205	305	329	315	322	298	269	319	263
ENSG00000167528.13	ZNF641	0.400912	5.13995	29.1354	2.0366e-05	0.000324788	446	451	467	430	440	383	464	338
ENSG00000171055.15	FEZ2	0.400752	5.40884	27.8636	2.70862e-05	0.000402952	450	599	553	504	509	456	521	417
ENSG00000168818.10	STX18	0.399782	4.67171	26.0482	4.12497e-05	0.000557344	336	327	348	285	304	252	335	283
ENSG00000243406.6	MRPS31P5	0.399616	4.93442	27.5182	2.93065e-05	0.000429513	393	419	391	347	366	337	378	320
ENSG00000107290.14	SETX	0.399547	5.90746	45.012	9.71685e-07	3.32934e-05	739	768	796	819	758	648	762	658
ENSG00000151576.10	QTRT2	0.399446	5.16502	23.5601	7.55081e-05	0.000900188	450	478	407	472	387	385	457	404
ENSG00000165392.11	WRN	0.398733	5.67236	24.0829	6.63103e-05	0.000813021	619	704	604	694	645	550	650	531
ENSG00000119927.14	GPAM	0.396134	5.08813	27.2221	3.13677e-05	0.000451647	424	437	407	432	390	394	423	333
ENSG00000028203.18	VEZT	0.395916	6.61638	38.5043	3.05647e-06	7.63016e-05	1107	1225	1365	1201	1129	1055	1183	1064
ENSG00000171988.19	JMJD1C	0.395076	6.73106	28.2162	2.50085e-05	0.000378433	1338	1405	1323	1282	1259	1242	1296	1046
ENSG00000168916.16	ZNF608	0.394499	6.25821	32.9676	9.00299e-06	0.000174788	894	1045	1018	984	870	874	1003	824
ENSG00000166225.9	FRS2	0.39426	4.85421	25.1459	5.1161e-05	0.000663415	343	410	360	368	346	325	360	312
ENSG00000145362.21	ANK2	0.394225	6.16926	27.5567	2.9049e-05	0.000426417	902	894	962	900	820	882	932	681
ENSG00000068305.17	MEF2A	0.394089	5.80189	34.8249	6.19064e-06	0.000130135	668	770	742	670	671	633	723	560
ENSG00000104412.8	EMC2	0.392244	5.10711	24.0922	6.61575e-05	0.000811866	407	489	454	430	443	400	442	334
ENSG00000130818.12	ZNF426	0.392007	5.31223	30.9335	1.3779e-05	0.000240373	489	519	505	461	469	452	475	396
ENSG00000117114.20	ADGRL2	0.391012	8.39285	24.8092	5.55042e-05	0.000708126	3668	4381	4665	4029	3728	4006	4136	3293
ENSG00000182916.8	TCEAL7	0.388289	5.27505	27.5615	2.90175e-05	0.000426181	471	501	478	490	429	456	470	408
ENSG00000164151.12	ICE1	0.388226	6.43727	43.8981	1.17242e-06	3.83218e-05	1054	1152	1109	1160	1102	913	1133	940
ENSG00000145734.19	BDP1	0.387048	5.76274	31.0077	1.35627e-05	0.000237498	703	700	718	715	714	560	692	626
ENSG00000065243.20	PKN2	0.386918	5.79244	28.0978	2.5686e-05	0.000386687	630	732	727	679	712	634	651	527
ENSG00000082153.18	BZW1	0.386492	7.52418	37.4175	3.74715e-06	8.93539e-05	2048	2503	2480	2264	2166	2091	2315	1894
ENSG00000107949.17	BCCIP	0.386469	6.22825	28.6243	2.28182e-05	0.000355066	906	948	1013	938	828	893	925	812
ENSG00000168411.14	RFWD3	0.385506	5.32857	32.0895	1.07965e-05	0.000200874	486	508	555	472	485	418	539	408
ENSG00000198938.2	MT-CO3	0.385305	11.6024	52.5626	2.9439e-07	1.37672e-05	36779	38851	39753	37042	37166	31368	41605	29722
ENSG00000140450.9	ARRDC4	0.384077	7.88416	24.7875	5.57974e-05	0.000710885	2533	3285	3009	2771	3059	2609	2825	2119
ENSG00000198742.10	SMURF1	0.382568	5.52754	38.9104	2.8352e-06	7.24101e-05	601	594	609	578	577	488	587	529
ENSG00000172262.12	ZNF131	0.381933	5.74846	27.9695	2.64435e-05	0.000395394	646	727	657	696	610	642	681	557
ENSG00000165322.18	ARHGAP12	0.381899	4.72275	23.6894	7.31103e-05	0.00087508	302	338	349	338	319	277	337	283
ENSG00000112701.18	SENP6	0.381241	5.98936	29.3695	1.93404e-05	0.000311664	730	879	792	860	796	738	803	649
ENSG00000088205.13	DDX18	0.380747	7.1475	34.2791	6.90157e-06	0.000141954	1625	1919	1893	1792	1751	1678	1759	1423
ENSG00000163877.11	SNIP1	0.380531	5.17679	31.6111	1.19354e-05	0.000215124	413	466	460	426	424	363	432	398
ENSG00000137492.9	THAP12	0.37838	6.53197	23.2149	8.2343e-05	0.000962696	930	1182	1309	1191	1208	1013	1101	911
ENSG00000107443.16	CCNJ	0.377238	5.73954	28.8216	2.18354e-05	0.000342318	633	679	701	713	725	543	691	555
ENSG00000106028.11	SSBP1	0.375856	6.06996	28.7877	2.20008e-05	0.000344315	767	893	873	824	792	786	812	688
ENSG00000245498.7	RP11-677M14.7	0.375572	5.13434	28.9191	2.13671e-05	0.000337065	425	452	433	412	402	355	458	371
ENSG00000115368.10	WDR75	0.37538	6.24594	25.4691	4.73392e-05	0.000622606	859	1114	955	980	1051	839	972	742
ENSG00000141219.16	C17orf80	0.374956	5.16122	26.7576	3.49292e-05	0.000490622	443	445	472	452	436	406	483	345
ENSG00000134318.14	ROCK2	0.373986	5.7176	26.5221	3.69012e-05	0.000512856	656	684	696	691	650	609	663	585
ENSG00000164631.19	ZNF12	0.373924	5.99248	26.4238	3.77599e-05	0.000522431	740	860	841	805	757	783	765	671
ENSG00000152661.9	GJA1	0.373442	5.49984	26.7992	3.45922e-05	0.000486876	529	571	635	499	536	474	576	472
ENSG00000052126.15	PLEKHA5	0.371381	5.01588	26.2502	3.93306e-05	0.000537681	413	408	416	366	368	361	409	339
ENSG00000198668.13	CALM1	0.370813	8.12999	36.0446	4.87417e-06	0.000108068	3043	3492	3991	3257	3354	2906	3540	2919
ENSG00000165732.13	DDX21	0.370271	6.91444	32.6517	9.60756e-06	0.000183819	1460	1610	1571	1608	1540	1433	1567	1227
ENSG00000135040.16	NAA35	0.370251	5.45387	30.9058	1.38609e-05	0.000241261	543	542	557	553	551	483	540	453
ENSG00000031003.10	FAM13B	0.369521	5.11253	29.8582	1.73764e-05	0.000287547	428	433	447	440	436	385	433	361
ENSG00000041802.11	LSG1	0.369204	5.89648	27.6274	2.85836e-05	0.000421372	731	798	772	699	686	669	758	653
ENSG00000134900.12	TPP2	0.368889	5.63256	26.4512	3.75181e-05	0.000520125	638	589	631	680	626	553	651	519
ENSG00000196715.7	VKORC1L1	0.367216	5.41874	23.8069	7.10029e-05	0.000856894	490	558	605	579	574	495	562	436
ENSG00000244462.8	RBM12	0.366706	7.34471	41.3418	1.82701e-06	5.23339e-05	1862	2134	2131	1956	2081	1650	2086	1683
ENSG00000021776.11	AQR	0.365144	6.10502	28.208	2.50548e-05	0.000378832	876	893	922	828	865	828	889	676
ENSG00000127947.16	PTPN12	0.364866	5.99732	32.1813	1.0592e-05	0.000198538	740	857	830	773	801	707	801	656
ENSG00000065548.18	ZC3H15	0.364691	6.08036	30.7517	1.43254e-05	0.000248028	797	931	866	811	833	739	854	728
ENSG00000248527.1	MTATP6P1	0.362771	7.9361	28.1273	2.55156e-05	0.000384539	3013	2762	3225	2925	2679	2480	3464	2482
ENSG00000156671.15	SAMD8	0.362043	5.52754	34.6511	6.40801e-06	0.000134094	573	608	599	556	612	471	599	493
ENSG00000120705.13	ETF1	0.361031	7.21082	25.098	5.17551e-05	0.000669094	1694	1849	1875	1939	1824	1796	1722	1469
ENSG00000074603.19	DPP8	0.36089	5.31651	23.3999	7.86001e-05	0.000927555	489	533	482	524	557	422	508	404
ENSG00000112078.14	KCTD20	0.360659	6.33345	33.4478	8.1619e-06	0.000161447	900	1104	1042	977	985	825	1060	874
ENSG00000065457.11	ADAT1	0.359935	4.89773	23.5698	7.53252e-05	0.000898483	370	362	382	372	368	277	395	346
ENSG00000130935.10	NOL11	0.359475	5.51879	24.773	5.59945e-05	0.000712411	550	597	612	592	571	553	607	455
ENSG00000164163.11	ABCE1	0.357804	6.23087	25.058	5.22573e-05	0.000673844	822	1014	958	981	983	853	931	749
ENSG00000104435.14	STMN2	0.355428	6.7608	37.6375	3.59464e-06	8.65479e-05	1385	1269	1391	1250	1321	1042	1407	1184
ENSG00000108021.20	TASOR2	0.354683	6.07083	34.1482	7.08511e-06	0.000145176	867	917	831	878	830	727	961	750
ENSG00000169016.17	E2F6	0.354171	5.55868	27.8414	2.72232e-05	0.000404549	554	615	587	548	561	515	598	477
ENSG00000110075.15	PPP6R3	0.354124	6.22646	36.2907	4.6476e-06	0.000104422	863	951	983	949	981	728	973	827
ENSG00000132646.11	PCNA	0.353376	6.99908	43.0507	1.35543e-06	4.21072e-05	1493	1530	1640	1562	1478	1351	1635	1351
ENSG00000141076.18	UTP4	0.353261	5.33293	23.1833	8.30012e-05	0.000968756	477	474	532	550	509	421	495	474
ENSG00000198185.11	ZNF334	0.353212	5.74653	24.1846	6.46676e-05	0.000797117	634	730	672	656	625	562	722	607
ENSG00000127804.13	METTL16	0.352358	6.37082	26.1351	4.04114e-05	0.000548877	1000	940	1104	1044	959	943	1020	890
ENSG00000126524.10	SBDS	0.351848	6.16642	24.742	5.64177e-05	0.000717136	837	923	923	886	872	879	859	716
ENSG00000217128.12	FNIP1	0.351197	5.16219	25.0457	5.24131e-05	0.000675538	443	480	431	494	476	395	462	398
ENSG00000197343.11	ZNF655	0.351027	5.83505	28.0792	2.57946e-05	0.000387689	688	759	723	738	763	624	757	584
ENSG00000139719.11	VPS33A	0.350142	5.90291	23.3892	7.88113e-05	0.000929651	685	730	733	713	678	664	753	582
ENSG00000092108.22	SCFD1	0.348871	5.4515	24.1729	6.48538e-05	0.000798345	541	574	545	551	573	496	526	475
ENSG00000171865.10	RNASEH1	0.348719	5.91061	27.7699	2.76697e-05	0.000410303	707	750	761	765	831	605	760	611
ENSG00000135837.16	CEP350	0.348165	6.00905	27.0646	3.25285e-05	0.000465401	853	810	770	850	825	721	803	728
ENSG00000109180.15	OCIAD1	0.345367	6.50511	23.2797	8.10098e-05	0.000951127	946	1245	1135	1180	1142	1022	1166	904
ENSG00000163807.6	KIAA1143	0.343734	6.08633	28.3888	2.40555e-05	0.000367942	789	859	910	808	792	786	847	731
ENSG00000175928.6	LRRN1	0.342685	7.55325	37.8994	3.42188e-06	8.3305e-05	2169	2331	2444	2318	2265	2078	2399	1969
ENSG00000062650.20	WAPL	0.342459	6.25561	30.5575	1.49349e-05	0.000255895	851	1058	1009	964	989	847	980	837
ENSG00000153989.8	NUS1	0.341163	5.83513	25.8363	4.33723e-05	0.000579518	647	710	752	702	751	633	693	572
ENSG00000127980.16	PEX1	0.338648	5.47035	23.0793	8.52117e-05	0.000989513	532	606	554	559	581	530	560	452
ENSG00000126261.13	UBA2	0.338646	7.85667	23.5353	7.5978e-05	0.000903969	2711	3062	3061	2768	2705	2888	2874	2423
ENSG00000174953.14	DHX36	0.338286	7.15774	32.5152	9.88262e-06	0.000188042	1625	1861	1831	1830	1781	1598	1831	1533
ENSG00000103550.14	KNOP1	0.337429	5.53463	24.4962	5.99044e-05	0.000752577	568	546	608	556	544	458	638	517
ENSG00000170903.11	MSANTD4	0.337023	5.60436	27.9952	2.62897e-05	0.000393635	558	652	605	591	609	510	624	532
ENSG00000167635.12	ZNF146	0.334624	7.603	27.5511	2.90864e-05	0.00042674	2214	2548	2475	2462	2494	2307	2333	2020
ENSG00000170871.12	KIAA0232	0.333441	6.50534	34.5111	6.58904e-06	0.000136642	1068	1124	1185	1196	1148	998	1175	1011
ENSG00000169895.6	SYAP1	0.333191	6.28972	23.4109	7.83843e-05	0.000926193	948	1024	929	931	983	919	972	754
ENSG00000123636.18	BAZ2B	0.327967	6.34084	24.5857	5.86085e-05	0.000739552	995	1055	1013	994	1023	966	962	893
ENSG00000182180.14	MRPS16	0.327022	6.16979	32.1769	1.06016e-05	0.000198582	840	893	876	864	860	785	913	746
ENSG00000164548.11	TRA2A	0.325756	6.20065	26.5549	3.66189e-05	0.000509189	900	858	906	970	926	799	919	817
ENSG00000258890.7	CEP95	0.324417	6.24531	26.0642	4.10933e-05	0.000555774	1012	982	894	907	938	882	976	818
ENSG00000112739.17	PRPF4B	0.324391	6.63738	26.6863	3.55131e-05	0.00049731	1163	1310	1345	1210	1249	1134	1295	1108
ENSG00000108587.16	GOSR1	0.323947	5.97599	29.3104	1.95938e-05	0.000314831	796	745	822	774	821	634	822	721
ENSG00000135316.19	SYNCRIP	0.320889	7.54096	23.5452	7.57907e-05	0.000902869	2140	2319	2421	2357	2433	2152	2322	1913
ENSG00000167232.14	ZNF91	0.320645	6.21051	26.2308	3.95112e-05	0.000538851	875	955	920	939	993	836	924	774
ENSG00000135679.26	MDM2	0.319694	7.96991	28.3409	2.4316e-05	0.000371312	2938	3271	3195	3082	3248	2945	3035	2681
ENSG00000116539.14	ASH1L	0.317356	6.19942	26.0825	4.09165e-05	0.000554344	937	887	915	966	889	807	973	878
ENSG00000124164.16	VAPB	0.315744	6.0026	25.7655	4.41083e-05	0.000587085	757	748	857	815	808	725	811	700
ENSG00000184007.22	PTP4A2	0.313769	6.70808	34.2469	6.94628e-06	0.000142767	1209	1316	1382	1282	1337	1124	1368	1157
ENSG00000166170.11	BAG5	0.311011	6.24213	26.5688	3.65003e-05	0.00050805	893	911	961	899	899	834	946	840
ENSG00000265354.4	TIMM23	0.31041	5.47231	23.7151	7.26433e-05	0.000870242	541	575	541	504	561	491	561	467
ENSG00000174197.17	MGA	0.308775	6.23769	23.7547	7.19305e-05	0.000864321	968	1018	916	970	968	871	1001	888
ENSG00000136527.18	TRA2B	0.305875	7.66185	32.368	1.01887e-05	0.000192619	2327	2420	2583	2472	2711	2057	2482	2230
ENSG00000078403.17	MLLT10	0.304647	6.16722	27.0021	3.30024e-05	0.000469513	830	933	927	912	932	762	970	822
ENSG00000100934.15	SEC23A	0.303774	6.00104	24.3649	6.1863e-05	0.000768472	729	837	834	765	814	707	844	696
ENSG00000146872.19	TLK2	0.299126	6.42677	23.8533	7.01893e-05	0.000850039	1031	1100	1110	1063	1068	1003	1048	1039
ENSG00000172888.12	ZNF621	0.29805	5.94906	25.8261	4.34775e-05	0.000580644	751	798	758	784	809	680	838	679
ENSG00000074696.13	HACD3	0.296817	7.29315	25.0903	5.18512e-05	0.000669543	1749	1956	2160	1875	2148	1671	2023	1691
ENSG00000136758.19	YME1L1	0.290575	7.22597	24.1275	6.55841e-05	0.000806976	1786	1961	1927	1753	2016	1729	1858	1635
ENSG00000138069.18	RAB1A	0.288811	6.36574	23.4919	7.68078e-05	0.000911383	973	1065	975	1038	1045	895	1067	951
ENSG00000253352.10	TUG1	0.287958	8.39004	24.644	5.77811e-05	0.000730777	3978	4510	4130	4147	4412	3920	4491	3570
ENSG00000166181.13	API5	0.287565	7.06812	23.8747	6.98175e-05	0.000847391	1547	1718	1680	1720	1764	1600	1716	1430
ENSG00000134748.13	PRPF38A	0.282644	6.84066	24.4956	5.99129e-05	0.000752577	1294	1441	1425	1471	1439	1285	1479	1316
ENSG00000170242.19	USP47	0.282052	6.8129	23.7522	7.19762e-05	0.000864494	1326	1447	1410	1410	1413	1322	1531	1222
ENSG00000131711.15	MAP1B	0.272965	9.82433	27.7756	2.76343e-05	0.000409998	10757	10965	11643	10258	10714	9938	12061	10321
ENSG00000168906.13	MAT2A	0.244405	8.88859	24.9014	5.42755e-05	0.000696301	5729	5887	5839	5767	6163	5303	6483	5466
ENSG00000198563.14	DDX39B	-0.251167	9.7815	24.7341	5.6526e-05	0.000717634	9610	9097	8798	9127	14043	11843	13819	12347
ENSG00000240694.9	PNMA2	-0.259861	7.21527	24.641	5.78227e-05	0.000730969	1526	1642	1547	1542	2479	1928	2520	2046
ENSG00000168028.14	RPSA	-0.265262	11.0651	25.5548	4.63789e-05	0.000612304	21926	20940	22147	21840	32548	29757	32535	29464
ENSG00000184014.9	DENND5A	-0.26608	7.28306	25.1656	5.09182e-05	0.000660576	1704	1681	1654	1556	2566	2106	2512	2284
ENSG00000067445.21	TRO	-0.27018	7.63676	24.1153	6.57823e-05	0.000808696	2190	2116	2084	1908	3255	2686	3176	2831
ENSG00000005156.12	LIG3	-0.27087	6.90809	24.4208	6.1021e-05	0.000760633	1296	1290	1218	1205	1931	1660	1914	1706
ENSG00000163902.12	RPN1	-0.270935	7.72261	24.4603	6.04331e-05	0.000756577	2137	2184	2260	2108	3298	2838	3299	3062
ENSG00000133030.22	MPRIP	-0.271267	7.70774	25.3423	4.87996e-05	0.000637267	2191	2108	2197	2151	3431	2572	3546	2961
ENSG00000064607.17	SUGP2	-0.273972	7.92926	25.4873	4.71332e-05	0.000620487	2639	2563	2461	2374	3952	3073	3998	3499
ENSG00000147548.17	NSD3	-0.275524	7.42965	25.7223	4.45639e-05	0.000592329	1810	1909	1746	1715	2797	2231	2783	2570
ENSG00000215021.10	PHB2	-0.27592	8.51163	24.0885	6.62191e-05	0.000812262	3544	3556	4040	3647	5805	4974	5672	4907
ENSG00000283041.1	RP11-371A22.1	-0.278089	9.76312	26.4131	3.78549e-05	0.000523483	8820	8387	8732	8837	13240	12022	13130	11841
ENSG00000187514.17	PTMA	-0.279641	9.73904	29.347	1.94365e-05	0.000312667	8725	8312	9154	8615	12917	11143	14038	12346
ENSG00000103485.19	QPRT	-0.279763	7.82516	23.9337	6.88028e-05	0.000839492	2185	2304	2400	2170	3643	2969	3483	3037
ENSG00000124181.14	PLCG1	-0.281451	8.69346	32.5627	9.7859e-06	0.000186586	4302	4080	4354	4296	6499	5499	6968	5787
ENSG00000100422.14	CERK	-0.281545	7.25436	28.6222	2.28289e-05	0.000355066	1526	1496	1593	1596	2442	2048	2497	2040
ENSG00000175390.15	EIF3F	-0.282548	9.15718	26.3686	3.82517e-05	0.000526864	5698	5581	6032	5697	9045	7706	8754	7872
ENSG00000089157.16	RPLP0	-0.283084	11.8169	27.7669	2.76888e-05	0.000410367	36637	33888	36676	36951	55598	50014	55067	48404
ENSG00000055483.19	USP36	-0.283259	6.7791	24.1746	6.48267e-05	0.000798345	1202	1119	1114	1155	1908	1415	1849	1525
ENSG00000124614.16	RPS10	-0.283384	10.2817	25.3419	4.88052e-05	0.000637267	12579	11727	12883	12511	18502	17352	18845	17280
ENSG00000003756.17	RBM5	-0.285358	8.1364	31.3419	1.26335e-05	0.000224925	3017	2986	2928	2934	4631	3833	4599	4200
ENSG00000033627.17	ATP6V0A1	-0.285839	6.99297	27.1731	3.1724e-05	0.000456011	1332	1319	1308	1172	2073	1620	2061	1731
ENSG00000140264.21	SERF2	-0.286014	8.38857	28.4637	2.36541e-05	0.000364218	3471	3260	3392	3545	5259	4529	5335	4768
ENSG00000167522.16	ANKRD11	-0.286266	7.45745	23.6063	7.46417e-05	0.000891097	1925	1717	1839	1781	3016	2165	3010	2440
ENSG00000121671.12	CRY2	-0.286677	6.69966	24.3643	6.18719e-05	0.000768472	1119	1069	1104	1032	1663	1463	1702	1466
ENSG00000197111.16	PCBP2	-0.286862	9.50865	27.0242	3.28345e-05	0.000468568	7561	7198	7838	7303	11276	10538	11439	10169
ENSG00000115677.18	HDLBP	-0.287259	8.82578	30.7757	1.42517e-05	0.000246908	4684	4465	4798	4430	7088	6216	7243	6211
ENSG00000178464.6	RPL10P16	-0.287461	7.9498	26.8107	3.45001e-05	0.000486443	2376	2358	2561	2500	3899	3312	3732	3319
ENSG00000158941.16	CCAR2	-0.289077	7.49271	27.5637	2.90026e-05	0.000426181	1792	1768	1961	1822	2941	2201	3082	2532
ENSG00000176986.16	SEC24C	-0.290153	7.63621	27.2603	3.10936e-05	0.000449049	2144	1964	2030	2001	3195	2635	3212	2849
ENSG00000103194.16	USP10	-0.291354	6.80973	30.2929	1.58114e-05	0.000267239	1187	1179	1191	1135	1887	1530	1853	1593
ENSG00000130520.11	LSM4	-0.292215	7.1165	27.7255	2.79512e-05	0.00041315	1343	1279	1440	1427	2236	1775	2206	1827
ENSG00000175203.17	DCTN2	-0.293065	7.57192	25.5677	4.62364e-05	0.000610712	2050	1815	2020	1882	3020	2522	2959	2848
ENSG00000134250.20	NOTCH2	-0.29389	6.93286	24.4893	6.00058e-05	0.000752724	1287	1280	1268	1213	2104	1483	2062	1772
ENSG00000204843.13	DCTN1	-0.294468	7.72303	24.2518	6.36056e-05	0.000786476	2232	1920	2258	2108	3375	2612	3538	2989
ENSG00000135506.16	OS9	-0.294653	7.8375	26.5581	3.6592e-05	0.000509071	2286	2200	2513	2231	3439	3082	3777	3211
ENSG00000105401.9	CDC37	-0.295031	7.27729	28.2757	2.46751e-05	0.000375347	1647	1508	1576	1529	2550	1966	2601	2089
ENSG00000158864.13	NDUFS2	-0.297062	6.7452	24.8706	5.46828e-05	0.000700517	1149	1055	1129	1039	1752	1345	1733	1593
ENSG00000149273.15	RPS3	-0.298188	11.2607	30.6147	1.47525e-05	0.000253994	25024	23319	25090	24729	37913	34105	37921	33898
ENSG00000204310.13	AGPAT1	-0.299437	6.72154	23.7487	7.20393e-05	0.000864503	1037	1027	1186	992	1704	1298	1720	1522
ENSG00000171858.18	RPS21	-0.299919	8.22562	23.3376	7.98402e-05	0.000940186	3145	2927	2955	3242	4810	3862	4894	4491
ENSG00000198728.11	LDB1	-0.300398	7.69904	25.8862	4.28617e-05	0.000574912	2232	2020	2250	2020	3515	2533	3515	3019
ENSG00000110042.8	DTX4	-0.300511	7.9449	27.3777	3.02658e-05	0.000440309	2383	2599	2518	2402	3995	3043	4416	3194
ENSG00000159842.16	ABR	-0.303381	6.28109	23.4727	7.71776e-05	0.000913884	826	758	822	769	1291	950	1390	1073
ENSG00000086758.16	HUWE1	-0.303643	8.11279	29.0557	2.0729e-05	0.000330197	3060	2755	2742	2709	4492	3537	4644	3975
ENSG00000076108.12	BAZ2A	-0.304007	7.62564	32.8138	9.29204e-06	0.000179268	2039	2101	2126	1896	3255	2576	3331	2887
ENSG00000254772.10	EEF1G	-0.304499	11.8724	35.21	5.73726e-06	0.000122748	38095	35470	37933	37394	57579	51083	58170	52376
ENSG00000108523.16	RNF167	-0.305448	6.21061	30.4389	1.53212e-05	0.000261347	739	735	759	699	1155	952	1225	1002
ENSG00000155660.11	PDIA4	-0.305987	7.63071	32.5336	9.84508e-06	0.000187456	2014	2053	1953	1917	3055	2770	3188	2691
ENSG00000136942.15	RPL35	-0.306608	9.59503	26.8928	3.3849e-05	0.000479094	8363	7350	7666	7926	11902	10454	12656	11210
ENSG00000077549.19	CAPZB	-0.306707	7.33763	28.4117	2.39318e-05	0.000367677	1717	1536	1779	1551	2673	2108	2614	2337
ENSG00000118816.11	CCNI	-0.307015	8.67425	37.3334	3.80733e-06	9.03483e-05	4033	4219	4332	4120	6759	5723	6683	5518
ENSG00000100138.15	SNU13	-0.307325	7.0666	34.3236	6.84045e-06	0.00014081	1305	1315	1408	1348	2070	1809	2129	1925
ENSG00000110092.4	CCND1	-0.30805	7.48767	31.6346	1.18766e-05	0.000214484	1791	1822	1860	1867	3125	2252	2965	2549
ENSG00000103423.14	DNAJA3	-0.308506	6.26491	23.9112	6.91892e-05	0.000841725	795	756	779	815	1349	999	1286	1036
ENSG00000142687.18	KIAA0319L	-0.310782	6.10163	23.2633	8.13447e-05	0.000954249	735	730	718	668	1159	861	1177	1037
ENSG00000103222.20	ABCC1	-0.310843	6.20703	23.8109	7.09332e-05	0.0008568	741	711	759	743	1210	935	1186	1052
ENSG00000066136.20	NFYC	-0.310865	6.263	26.4605	3.74368e-05	0.000519319	772	753	788	757	1131	1059	1246	1103
ENSG00000168003.18	SLC3A2	-0.310951	9.29117	25.9574	4.21443e-05	0.000567217	6193	5877	6831	6459	9923	9182	10034	8356
ENSG00000104824.18	HNRNPL	-0.311149	8.18802	38.2355	3.2133e-06	7.94997e-05	3056	2883	3022	2977	4750	3860	4806	4285
ENSG00000151348.16	EXT2	-0.31194	7.12639	24.9605	5.35039e-05	0.000687638	1399	1426	1472	1300	2132	2060	2134	1934
ENSG00000167085.13	PHB	-0.312444	6.55428	31.274	1.28165e-05	0.000227744	968	929	954	909	1524	1206	1532	1323
ENSG00000143393.17	PI4KB	-0.312734	6.18887	24.7812	5.58828e-05	0.000711426	794	699	767	682	1147	953	1235	1035
ENSG00000229119.3	CTB-63M22.1	-0.312928	7.24282	23.3588	7.94154e-05	0.000935581	1575	1417	1474	1482	2154	2189	2302	2137
ENSG00000130811.12	EIF3G	-0.313073	7.31714	31.0673	1.33918e-05	0.000235262	1533	1426	1659	1595	2491	2092	2542	2102
ENSG00000125651.14	GTF2F1	-0.313203	6.88569	28.5474	2.32144e-05	0.000359729	1217	1104	1255	1179	2035	1551	1898	1589
ENSG00000001497.18	LAS1L	-0.313266	6.67979	24.9824	5.3222e-05	0.000684371	1082	988	1013	1078	1653	1358	1709	1464
ENSG00000135821.19	GLUL	-0.313295	8.73939	35.6019	5.31286e-06	0.000115543	4306	4295	4527	4049	6791	5972	6645	6019
ENSG00000100316.16	RPL3	-0.314316	12.4338	37.8233	3.47114e-06	8.4297e-05	54897	52235	56463	55795	86696	76198	86195	76219
ENSG00000204435.15	CSNK2B	-0.314357	7.28891	29.5826	1.84556e-05	0.000301151	1616	1488	1675	1611	2378	2284	2537	2261
ENSG00000022840.17	RNF10	-0.314478	6.44074	26.0376	4.13524e-05	0.000558459	913	926	858	856	1403	1165	1383	1320
ENSG00000010292.13	NCAPD2	-0.314814	7.30271	31.3579	1.25908e-05	0.000224453	1617	1507	1574	1540	2388	2049	2678	2167
ENSG00000178996.14	SNX18	-0.315236	5.59555	24.8524	5.49251e-05	0.000702681	496	498	497	476	830	675	782	639
ENSG00000105323.17	HNRNPUL1	-0.315655	8.70736	37.5551	3.65093e-06	8.75875e-05	4242	3981	4448	4064	6912	5377	6873	5770
ENSG00000100804.19	PSMB5	-0.316333	6.88269	31.2532	1.28731e-05	0.000228456	1182	1105	1275	1145	1925	1562	1866	1648
ENSG00000142207.7	URB1	-0.317565	6.3228	28.2039	2.5078e-05	0.000378977	872	818	802	816	1357	1050	1358	1170
ENSG00000262879.6	RP11-156P1.3	-0.317657	6.06955	25.8587	4.31424e-05	0.000577232	733	721	676	676	1130	948	1184	923
ENSG00000141551.14	CSNK1D	-0.318456	7.0726	26.6829	3.55417e-05	0.000497458	1336	1219	1470	1314	2252	1623	2244	1865
ENSG00000104904.12	OAZ1	-0.318928	8.19478	32.2646	1.04099e-05	0.000195693	3009	2723	2979	2890	4944	3563	4779	4068
ENSG00000161021.13	MAML1	-0.319088	6.53026	28.9395	2.12701e-05	0.000336108	958	952	966	894	1510	1135	1663	1333
ENSG00000105618.14	PRPF31	-0.319322	6.01855	27.5027	2.94107e-05	0.000430356	652	621	644	650	1071	815	1075	877
ENSG00000069998.12	HDHD5	-0.319816	5.74695	24.5393	5.92771e-05	0.000745609	577	508	560	494	840	699	920	736
ENSG00000134825.16	TMEM258	-0.320022	6.77579	26.1473	4.02958e-05	0.000547932	1110	1077	1155	1083	1713	1459	1797	1624
ENSG00000111667.14	USP5	-0.320094	6.87413	27.6667	2.83286e-05	0.000417836	1122	1076	1276	1115	1915	1421	1962	1571
ENSG00000171456.20	ASXL1	-0.320534	7.21848	31.3531	1.26036e-05	0.000224538	1579	1417	1579	1444	2344	1909	2482	2247
ENSG00000105723.13	GSK3A	-0.320681	6.26189	27.2411	3.12309e-05	0.000450561	757	717	848	737	1279	983	1231	1076
ENSG00000135473.15	PAN2	-0.321384	6.59027	28.3055	2.45103e-05	0.00037362	1025	1016	938	923	1465	1375	1637	1341
ENSG00000160803.8	UBQLN4	-0.322069	6.51381	33.668	7.80522e-06	0.000156115	884	911	947	921	1422	1256	1546	1247
ENSG00000105677.12	TMEM147	-0.322706	5.52752	23.7594	7.18476e-05	0.0008637	441	449	451	476	767	590	730	632
ENSG00000144029.12	MRPS5	-0.323774	5.87929	24.3446	6.21716e-05	0.000771502	648	596	606	542	893	828	994	856
ENSG00000077782.22	FGFR1	-0.323812	8.32377	30.0317	1.67324e-05	0.000278053	3148	3035	3669	3003	5252	4053	5271	4662
ENSG00000236552.2	RPL13AP5	-0.323868	9.82787	31.1538	1.31477e-05	0.000231992	9461	8653	8724	9142	14282	12719	14478	12274
ENSG00000177600.9	RPLP2	-0.324429	9.46302	30.9939	1.36028e-05	0.000238049	6875	6406	6934	7187	11235	9656	10783	9284
ENSG00000244038.11	DDOST	-0.324485	7.81373	35.368	5.56188e-06	0.000119547	2294	2244	2272	2150	3653	2839	3632	3291
ENSG00000175334.8	BANF1	-0.324929	6.63364	31.5728	1.20322e-05	0.000216025	986	938	1034	971	1631	1275	1690	1303
ENSG00000136718.10	IMP4	-0.325324	5.80696	23.8551	7.01583e-05	0.000850037	564	534	563	595	991	699	940	762
ENSG00000110900.16	TSPAN11	-0.325679	7.02877	33.715	7.73136e-06	0.000155103	1375	1275	1354	1326	2115	1748	2361	1782
ENSG00000087086.15	FTL	-0.325833	10.0989	27.2605	3.10919e-05	0.000449049	11691	11016	11199	9788	17778	14534	16771	16209
ENSG00000099341.12	PSMD8	-0.326616	7.36723	28.3978	2.40066e-05	0.000367914	1666	1509	1758	1582	2732	2150	2672	2223
ENSG00000196497.17	IPO4	-0.327094	6.5035	26.3077	3.88027e-05	0.000532787	912	793	929	959	1476	1172	1494	1254
ENSG00000137207.12	YIPF3	-0.328076	6.86122	33.7579	7.6645e-06	0.000153874	1193	1100	1153	1165	1922	1476	1859	1668
ENSG00000171148.14	TADA3	-0.328248	6.32558	28.4194	2.38907e-05	0.000367248	782	752	783	819	1229	986	1364	1136
ENSG00000140320.12	BAHD1	-0.328765	6.82429	23.9304	6.88593e-05	0.000839733	1146	1093	1254	1115	2052	1339	1949	1613
ENSG00000184110.15	EIF3C	-0.329163	9.07838	31.9232	1.11784e-05	0.000205579	5334	4926	5946	5078	8224	7106	8797	7778
ENSG00000133884.10	DPF2	-0.329243	6.67904	37.4646	3.71391e-06	8.8714e-05	1051	1025	1074	1007	1660	1362	1738	1484
ENSG00000204427.12	ABHD16A	-0.329247	5.60352	24.8322	5.51951e-05	0.000705809	470	485	509	496	830	653	800	663
ENSG00000148308.18	GTF3C5	-0.329492	6.19772	23.7951	7.12115e-05	0.000857916	744	669	761	734	1233	872	1248	1032
ENSG00000169976.7	SF3B5	-0.329924	6.35903	29.759	1.77566e-05	0.000291746	838	767	807	838	1404	1039	1328	1124
ENSG00000164587.13	RPS14	-0.330148	10.284	33.4227	8.20356e-06	0.00016211	12591	12031	12315	13103	20086	17397	19790	17775
ENSG00000099995.19	SF3A1	-0.330938	7.50513	38.4834	3.06835e-06	7.6529e-05	1859	1741	1898	1762	2913	2577	2960	2450
ENSG00000257923.12	CUX1	-0.331424	6.92953	39.2149	2.68074e-06	6.93609e-05	1231	1208	1287	1205	2010	1720	2046	1639
ENSG00000100412.17	ACO2	-0.332454	7.07879	35.241	5.70238e-06	0.000122285	1373	1249	1378	1281	2203	1784	2158	1807
ENSG00000111640.15	GAPDH	-0.333258	11.7614	32.6563	9.59853e-06	0.000183773	32851	30784	38300	33239	54675	44821	55025	48837
ENSG00000174748.22	RPL15	-0.333559	11.0185	45.2207	9.38433e-07	3.24351e-05	21047	20466	21244	20962	33603	28080	33856	30414
ENSG00000001167.15	NFYA	-0.334344	5.70969	25.1892	5.06295e-05	0.000657756	508	536	541	489	870	758	793	696
ENSG00000123144.11	TRIR	-0.33485	6.88574	27.8636	2.70866e-05	0.000402952	1258	1061	1219	1183	1999	1476	2005	1661
ENSG00000101152.11	DNAJC5	-0.335348	6.84993	29.1537	2.02838e-05	0.000323664	1096	1075	1217	1195	1917	1374	1942	1698
ENSG00000072832.15	CRMP1	-0.335556	8.01303	35.7632	5.14817e-06	0.000113027	2480	2415	2704	2542	4276	3094	4374	3608
ENSG00000105254.12	TBCB	-0.335728	6.46643	33.9181	7.42075e-06	0.000150178	835	831	892	913	1440	1117	1469	1220
ENSG00000076604.15	TRAF4	-0.336168	7.61419	26.2643	3.92005e-05	0.000536199	1923	1835	2168	1822	3438	2373	3254	2672
ENSG00000108518.8	PFN1	-0.336358	7.80323	26.9471	3.34253e-05	0.00047431	2138	2009	2417	2184	3710	2665	3827	3057
ENSG00000089693.11	MLF2	-0.336534	7.75088	39.6865	2.45937e-06	6.51437e-05	2234	2081	2230	2078	3684	2752	3585	3024
ENSG00000126247.11	CAPNS1	-0.337141	6.91637	25.7195	4.4593e-05	0.000592398	1140	1089	1365	1084	1842	1535	1981	1701
ENSG00000179912.20	R3HDM2	-0.337208	5.42907	23.1286	8.41553e-05	0.000980159	433	466	441	408	671	578	775	617
ENSG00000073111.14	MCM2	-0.33724	6.92204	25.5949	4.59368e-05	0.000608206	1164	1088	1334	1244	2038	1444	2104	1737
ENSG00000213676.13	ATF6B	-0.337588	6.34043	31.0585	1.3417e-05	0.0002353	762	805	817	819	1339	988	1389	1137
ENSG00000165688.12	PMPCA	-0.338131	6.10222	25.43	4.7785e-05	0.000627277	695	656	669	680	1210	845	1086	950
ENSG00000105193.9	RPS16	-0.3382	9.94416	37.9949	3.36113e-06	8.21297e-05	10017	9477	9746	10100	16169	13072	15852	14334
ENSG00000105379.10	ETFB	-0.338302	6.61086	25.2714	4.96378e-05	0.000646389	927	855	1030	934	1528	1298	1570	1265
ENSG00000141002.20	TCF25	-0.338608	6.84083	27.4861	2.95226e-05	0.000431538	1135	1096	1172	1105	1795	1318	2017	1707
ENSG00000004975.12	DVL2	-0.338788	6.49131	25.0787	5.19966e-05	0.000670795	843	835	981	857	1405	1099	1548	1273
ENSG00000175137.11	SH3BP5L	-0.338983	5.23773	24.2245	6.40348e-05	0.000790724	385	362	379	374	628	464	645	537
ENSG00000130255.13	RPL36	-0.33912	9.70821	29.1706	2.02083e-05	0.000322831	8661	7481	7971	8602	12820	11313	13921	11424
ENSG00000139197.11	PEX5	-0.339263	5.68359	25.4098	4.80166e-05	0.000630019	516	489	513	531	816	673	859	751
ENSG00000105443.15	CYTH2	-0.340536	6.26002	29.8259	1.74994e-05	0.000289063	752	702	801	758	1275	944	1265	1086
ENSG00000184677.18	ZBTB40	-0.340977	5.56934	25.2377	5.00417e-05	0.000651343	528	509	464	458	783	624	830	731
ENSG00000204351.12	SKIV2L	-0.341417	6.3243	26.9653	3.32851e-05	0.000472562	818	714	859	806	1315	1030	1364	1141
ENSG00000276550.4	HERC2P2	-0.342514	6.76674	28.0469	2.59835e-05	0.000389962	1130	1207	1187	1073	1849	1428	1881	1804
ENSG00000164733.22	CTSB	-0.342886	7.07066	28.8517	2.16896e-05	0.000340897	1404	1291	1443	1217	2237	1820	2162	1893
ENSG00000015676.18	NUDCD3	-0.344353	6.70761	28.9437	2.12506e-05	0.000335992	1068	950	1093	1069	1707	1401	1718	1516
ENSG00000010803.16	SCMH1	-0.344665	5.19707	24.3988	6.1351e-05	0.000763715	366	342	354	379	563	513	622	489
ENSG00000008838.20	MED24	-0.344771	7.22309	31.8221	1.14177e-05	0.000208923	1587	1374	1483	1459	2463	1835	2503	2182
ENSG00000065802.12	ASB1	-0.345179	6.75179	33.2483	8.50041e-06	0.000167378	1157	1020	1064	1103	1893	1439	1759	1516
ENSG00000147123.11	NDUFB11	-0.345628	6.51073	34.6786	6.37307e-06	0.000133463	841	933	884	853	1503	1172	1501	1168
ENSG00000188976.11	NOC2L	-0.345864	6.62107	31.5895	1.199e-05	0.000215687	993	884	1044	951	1693	1240	1620	1345
ENSG00000049618.24	ARID1B	-0.345893	6.3539	31.3381	1.26436e-05	0.00022496	823	774	877	791	1378	1000	1429	1170
ENSG00000170037.14	CNTROB	-0.346157	5.66739	27.5733	2.89395e-05	0.000425486	528	489	527	502	824	626	893	772
ENSG00000214021.16	TTLL3	-0.346715	6.23517	26.8444	3.42311e-05	0.000483515	851	740	769	718	1249	943	1327	1169
ENSG00000178035.13	IMPDH2	-0.347256	9.34957	32.1673	1.0623e-05	0.000198714	6205	6097	6743	6527	10061	9798	9982	8834
ENSG00000103051.20	COG4	-0.347638	6.14813	31.0596	1.34137e-05	0.0002353	719	688	735	681	1116	1048	1138	978
ENSG00000137312.15	FLOT1	-0.3477	6.22503	33.6839	7.7801e-06	0.000155818	742	701	804	727	1235	968	1263	1063
ENSG00000124194.17	GDAP1L1	-0.348023	6.12118	28.3965	2.40138e-05	0.000367914	684	600	686	666	1126	824	1116	955
ENSG00000128524.5	ATP6V1F	-0.3488	6.47456	28.6429	2.27239e-05	0.00035403	915	850	948	821	1504	1140	1432	1305
ENSG00000077684.16	JADE1	-0.349026	5.66199	28.7892	2.19938e-05	0.000344315	522	529	516	468	812	690	858	736
ENSG00000127616.20	SMARCA4	-0.349351	8.54784	40.584	2.0912e-06	5.82442e-05	3703	3561	3918	3550	6193	4645	6573	5113
ENSG00000168137.19	SETD5	-0.350207	7.90308	25.0147	5.28068e-05	0.000679664	2693	2548	2430	2361	4185	3028	3963	4105
ENSG00000185624.16	P4HB	-0.350385	8.69418	38.6319	2.98498e-06	7.49902e-05	3991	3846	4343	3915	6948	5414	6661	5532
ENSG00000105700.11	KXD1	-0.350411	6.50895	32.1474	1.06669e-05	0.000199267	897	819	959	923	1521	1225	1426	1306
ENSG00000141349.9	G6PC3	-0.350898	5.7453	24.8714	5.46716e-05	0.000700517	547	493	545	503	919	640	855	776
ENSG00000133422.14	MORC2	-0.351017	5.92335	24.618	5.8148e-05	0.000734075	672	633	568	567	984	813	993	926
ENSG00000107874.11	CUEDC2	-0.351571	6.37826	35.0528	5.9178e-06	0.00012516	765	760	820	829	1265	1116	1358	1100
ENSG00000071626.17	DAZAP1	-0.353175	5.88927	24.1846	6.46671e-05	0.000797117	556	533	627	575	948	691	1045	828
ENSG00000167118.11	URM1	-0.354183	6.30304	32.8244	9.27179e-06	0.000179002	745	769	837	723	1257	1005	1327	1111
ENSG00000070814.22	TCOF1	-0.356191	6.36683	33.27	8.46288e-06	0.000166758	813	826	787	801	1340	995	1469	1154
ENSG00000175931.13	UBE2O	-0.356345	6.32142	29.5792	1.84693e-05	0.000301151	853	768	818	776	1406	976	1433	1130
ENSG00000107798.18	LIPA	-0.357209	5.49993	26.1221	4.05361e-05	0.000550118	451	492	453	446	787	657	679	687
ENSG00000125648.15	SLC25A23	-0.357257	5.76395	24.1228	6.56595e-05	0.000807545	558	510	577	490	939	635	921	786
ENSG00000155363.18	MOV10	-0.357836	6.46265	33.5988	7.9155e-06	0.000157708	878	904	856	797	1385	1139	1450	1285
ENSG00000157216.16	SSBP3	-0.358471	6.88683	28.0203	2.61405e-05	0.000392037	1172	1092	1264	1115	2015	1383	1933	1800
ENSG00000172992.12	DCAKD	-0.358481	5.68833	31.5897	1.19893e-05	0.000215687	523	540	509	499	879	678	886	736
ENSG00000185825.17	BCAP31	-0.359418	6.11179	32.101	1.07707e-05	0.000200623	719	673	702	655	1249	911	1102	960
ENSG00000073578.17	SDHA	-0.359771	6.2469	35.0949	5.86882e-06	0.000124504	783	722	740	759	1284	1015	1231	1080
ENSG00000196821.10	ILRUN	-0.360147	5.74084	34.5243	6.57178e-06	0.000136481	504	548	551	536	887	765	853	769
ENSG00000077235.18	GTF3C1	-0.360526	7.60537	37.9564	3.38549e-06	8.25792e-05	1999	1867	1950	1942	3315	2358	3448	2839
ENSG00000065000.19	AP3D1	-0.360841	7.89953	43.7359	1.20525e-06	3.8993e-05	2434	2259	2487	2323	4094	3023	4086	3426
ENSG00000165801.10	ARHGEF40	-0.36124	5.65246	23.8021	7.10875e-05	0.00085744	502	515	525	481	898	588	871	761
ENSG00000197226.13	TBC1D9B	-0.361244	6.56265	32.0302	1.09312e-05	0.000202835	930	878	1027	892	1553	1153	1661	1372
ENSG00000104957.14	CCDC130	-0.362094	5.84627	30.5961	1.48116e-05	0.000254694	557	581	613	529	999	717	942	849
ENSG00000168005.9	SPINDOC	-0.362158	5.68634	30.2182	1.6069e-05	0.000270603	520	464	518	497	861	674	846	695
ENSG00000068323.17	TFE3	-0.362841	6.38833	32.5451	9.82167e-06	0.000187139	866	862	811	789	1482	1034	1354	1255
ENSG00000084731.15	KIF3C	-0.362902	5.6553	25.648	4.53589e-05	0.000602283	504	452	515	496	858	584	854	739
ENSG00000142541.18	RPL13A	-0.362943	11.7196	46.2025	7.97789e-07	2.88885e-05	33597	31205	33910	33452	54346	46879	54616	47069
ENSG00000166794.6	PPIB	-0.363023	8.07993	43.4408	1.26758e-06	4.03368e-05	2670	2493	2774	2649	4270	3715	4343	3911
ENSG00000159202.18	UBE2Z	-0.363602	6.12068	36.5291	4.43901e-06	0.000101649	749	725	723	648	1180	1004	1142	1040
ENSG00000163872.16	YEATS2	-0.364187	6.59578	36.9996	4.05671e-06	9.44576e-05	1010	1024	948	916	1572	1265	1707	1459
ENSG00000125991.20	ERGIC3	-0.364227	7.94788	37.0965	3.98254e-06	9.31222e-05	2494	2179	2621	2423	4078	3317	3909	3627
ENSG00000277258.5	PCGF2	-0.364473	6.1351	27.4431	2.98147e-05	0.000434835	785	630	700	676	1159	914	1179	1047
ENSG00000180357.9	ZNF609	-0.364499	7.07388	45.1135	9.55359e-07	3.28153e-05	1384	1408	1431	1257	2296	1903	2313	1919
ENSG00000105341.19	DMAC2	-0.365142	6.35261	31.0544	1.34287e-05	0.0002353	751	735	882	801	1358	1071	1324	1128
ENSG00000151612.18	ZNF827	-0.366075	5.56782	28.836	2.17656e-05	0.000341599	478	498	497	496	845	590	862	746
ENSG00000052749.14	RRP12	-0.366708	5.8185	29.8129	1.75491e-05	0.000289139	589	536	556	566	984	701	995	798
ENSG00000273749.5	CYFIP1	-0.36679	6.49121	42.9632	1.37606e-06	4.23762e-05	872	881	880	903	1468	1196	1577	1221
ENSG00000133056.14	PIK3C2B	-0.366937	5.53779	23.4438	7.77396e-05	0.000919359	450	508	477	421	778	576	831	683
ENSG00000073536.18	NLE1	-0.366944	6.041	33.1127	8.73921e-06	0.000170745	666	596	684	683	1120	916	1048	964
ENSG00000156515.24	HK1	-0.36761	6.70652	42.9359	1.38255e-06	4.25288e-05	1105	1042	1029	974	1724	1388	1771	1521
ENSG00000215030.5	RPL13P12	-0.367961	8.1466	41.8276	1.67696e-06	4.87673e-05	2805	2618	2755	2770	4358	4011	4477	3989
ENSG00000169862.19	CTNND2	-0.368075	7.0805	39.3038	2.63738e-06	6.83823e-05	1286	1368	1437	1250	2185	1854	2455	1762
ENSG00000087088.20	BAX	-0.368716	6.26847	28.3338	2.43547e-05	0.000371698	764	716	776	780	1419	960	1190	1126
ENSG00000137497.18	NUMA1	-0.369128	8.4771	43.2278	1.31476e-06	4.12732e-05	3655	3295	3636	3470	6044	4429	6253	5064
ENSG00000149476.16	TKFC	-0.369439	5.84414	26.0814	4.09275e-05	0.000554344	564	504	608	569	967	686	970	853
ENSG00000163516.14	ANKZF1	-0.369514	5.5593	27.3547	3.04259e-05	0.000442174	522	496	449	451	814	639	813	699
ENSG00000135390.21	ATP5MC2	-0.370422	8.67254	40.221	2.23233e-06	6.07094e-05	4015	3784	3886	4148	6359	5853	6598	5602
ENSG00000163956.13	LRPAP1	-0.370885	6.8319	41.2796	1.84726e-06	5.2774e-05	1113	1063	1170	1134	2003	1469	1871	1597
ENSG00000127527.14	EPS15L1	-0.371258	5.8094	35.0951	5.8686e-06	0.000124504	580	524	600	539	920	806	921	814
ENSG00000087111.21	PIGS	-0.371751	6.21576	42.3654	1.52633e-06	4.55351e-05	716	709	760	725	1218	998	1204	1077
ENSG00000068745.15	IP6K2	-0.371848	7.28125	43.3495	1.28758e-06	4.07391e-05	1558	1558	1591	1548	2737	1939	2710	2321
ENSG00000105583.11	WDR83OS	-0.371858	6.25918	30.4824	1.51781e-05	0.000259067	734	708	755	795	1305	954	1226	1148
ENSG00000105953.15	OGDH	-0.372756	6.06388	34.3826	6.7603e-06	0.000139671	648	622	686	641	1126	890	1096	911
ENSG00000160469.17	BRSK1	-0.373311	5.68021	26.1701	4.00795e-05	0.000545795	532	467	529	489	819	638	954	724
ENSG00000118971.9	CCND2	-0.373417	8.78643	52.7015	2.88332e-07	1.35756e-05	4551	4463	4325	4313	7359	5904	7664	6441
ENSG00000071242.12	RPS6KA2	-0.374222	5.35549	31.7781	1.15237e-05	0.000210584	402	382	402	414	694	530	656	600
ENSG00000161800.13	RACGAP1	-0.374694	5.55535	31.4912	1.22409e-05	0.000219203	475	500	483	449	732	652	826	740
ENSG00000143862.8	ARL8A	-0.374711	5.84312	24.4507	6.05751e-05	0.000756577	583	527	599	555	1016	744	956	801
ENSG00000140497.16	SCAMP2	-0.374942	5.20797	27.4904	2.94932e-05	0.000431337	358	349	366	354	614	480	614	507
ENSG00000204628.12	RACK1	-0.375151	11.3051	53.8186	2.44292e-07	1.2186e-05	24883	22890	25713	24462	40680	34688	40378	35851
ENSG00000167815.12	PRDX2	-0.375221	7.51958	34.0297	7.25578e-06	0.000147703	1809	1588	1830	1803	2905	2205	3072	2738
ENSG00000143842.15	SOX13	-0.375506	5.94325	36.4203	4.53286e-06	0.00010261	601	584	639	593	983	838	1105	828
ENSG00000083845.9	RPS5	-0.375694	9.97959	44.7914	1.00824e-06	3.44182e-05	10035	9027	10023	10211	17017	13348	16419	14226
ENSG00000131067.17	GGT7	-0.376337	5.499	23.8085	7.09759e-05	0.000856894	482	424	427	449	744	532	839	664
ENSG00000112514.18	CUTA	-0.376878	6.77434	37.1053	3.97586e-06	9.30444e-05	1081	956	1140	1052	1841	1378	1770	1583
ENSG00000105372.8	RPS19	-0.378026	10.885	53.3908	2.60222e-07	1.27509e-05	18784	17527	18382	18719	30974	26055	30547	26388
ENSG00000092098.17	RNF31	-0.378177	7.11571	34.0466	7.23117e-06	0.00014742	1401	1177	1447	1385	2328	1747	2372	1982
ENSG00000114738.11	MAPKAPK3	-0.378319	5.47338	30.9652	1.36864e-05	0.000238908	417	453	450	389	714	570	733	638
ENSG00000117410.14	ATP6V0B	-0.378966	6.78264	43.1695	1.328e-06	4.14718e-05	1118	1060	1069	1054	1952	1414	1790	1545
ENSG00000005075.15	POLR2J	-0.379743	5.33272	27.0477	3.26564e-05	0.000466748	437	391	390	366	679	538	686	564
ENSG00000115234.11	SNX17	-0.379995	6.36514	44.5933	1.04235e-06	3.53213e-05	794	807	866	778	1352	1143	1323	1218
ENSG00000100266.19	PACSIN2	-0.380237	5.91456	39.9338	2.35134e-06	6.31193e-05	606	606	612	575	1030	784	1078	851
ENSG00000160310.18	PRMT2	-0.380546	6.18634	40.6096	2.08162e-06	5.80359e-05	695	775	726	679	1176	963	1251	1083
ENSG00000068903.20	SIRT2	-0.380607	5.5693	27.3436	3.05035e-05	0.00044307	486	442	524	406	812	618	807	659
ENSG00000077312.9	SNRPA	-0.381079	6.88149	37.2014	3.90389e-06	9.1826e-05	1176	1076	1270	1107	1941	1492	1970	1805
ENSG00000106400.12	ZNHIT1	-0.381134	5.2804	28.0072	2.6218e-05	0.000392986	394	379	405	350	647	474	672	590
ENSG00000104907.13	TRMT1	-0.381475	5.66435	30.3404	1.56502e-05	0.000264838	499	504	491	477	874	666	871	667
ENSG00000144711.16	IQSEC1	-0.381496	6.31261	28.227	2.49475e-05	0.000378433	787	772	867	722	1333	935	1421	1228
ENSG00000134690.11	CDCA8	-0.381576	5.43843	23.0777	8.52443e-05	0.000989513	422	416	445	395	651	531	744	686
ENSG00000172053.18	QARS1	-0.381826	8.08965	46.3945	7.73073e-07	2.81612e-05	2671	2476	2792	2643	4419	3930	4340	3752
ENSG00000159111.13	MRPL10	-0.381877	7.05339	39.0688	2.75364e-06	7.08499e-05	1333	1181	1425	1243	2169	1894	2112	1876
ENSG00000130402.13	ACTN4	-0.381995	6.91879	32.2814	1.03737e-05	0.000195291	1185	1103	1293	1104	2001	1428	2175	1727
ENSG00000130706.13	ADRM1	-0.382028	5.8466	26.1337	4.04248e-05	0.000548877	502	506	585	588	1007	681	957	768
ENSG00000213465.8	ARL2	-0.382379	5.81186	26.0789	4.09513e-05	0.000554395	582	489	571	508	921	712	940	783
ENSG00000167491.18	GATAD2A	-0.382672	7.39401	30.6072	1.47761e-05	0.000254242	1718	1494	1745	1715	3104	2151	2923	2276
ENSG00000160613.14	PCSK7	-0.383208	5.70006	24.45	6.05863e-05	0.000756577	540	489	507	547	963	640	863	792
ENSG00000126457.22	PRMT1	-0.383239	7.71108	45.4645	9.01143e-07	3.16601e-05	2076	1844	2087	2077	3521	2769	3466	2869
ENSG00000160014.17	CALM3	-0.383261	8.64287	43.0324	1.35972e-06	4.21072e-05	3957	3722	4172	3722	6698	4854	6877	5921
ENSG00000176340.4	COX8A	-0.383444	6.93115	36.1644	4.76242e-06	0.000106414	1229	1116	1226	1147	2087	1605	1978	1695
ENSG00000086504.18	MRPL28	-0.383595	6.26022	31.7535	1.15832e-05	0.000210974	704	674	805	748	1344	971	1253	1016
ENSG00000144560.15	VGLL4	-0.383603	6.42276	34.3992	6.73788e-06	0.000139311	865	857	924	747	1468	1182	1395	1240
ENSG00000100626.17	GALNT16	-0.38392	5.66034	28.2318	2.49206e-05	0.000378433	467	457	529	507	832	600	906	731
ENSG00000274523.5	RCC1L	-0.384826	5.29169	31.6405	1.18618e-05	0.000214356	364	357	410	377	652	506	675	526
ENSG00000008130.15	NADK	-0.385033	5.37137	31.9407	1.11376e-05	0.000205367	402	377	438	415	714	525	709	605
ENSG00000109107.14	ALDOC	-0.385075	5.48529	25.3605	4.8588e-05	0.000635709	454	404	451	408	706	578	783	618
ENSG00000081177.18	EXD2	-0.385298	4.80682	24.73	5.65835e-05	0.000717926	288	313	255	260	456	372	491	424
ENSG00000067225.19	PKM	-0.385334	9.84603	42.5583	1.47597e-06	4.44156e-05	8907	8272	9954	8732	14924	11773	15684	13657
ENSG00000069188.17	SDK2	-0.385438	8.41456	32.5063	9.90073e-06	0.000188236	3591	3117	3243	3413	6009	4042	6043	4908
ENSG00000102181.21	CD99L2	-0.385512	7.07008	42.6984	1.44053e-06	4.35858e-05	1280	1219	1414	1310	2288	1811	2281	1791
ENSG00000146083.12	RNF44	-0.386089	6.44707	27.7597	2.77343e-05	0.000410821	906	866	866	788	1477	1012	1609	1283
ENSG00000174903.16	RAB1B	-0.387591	6.39251	26.5868	3.63478e-05	0.000506181	814	707	923	775	1485	1061	1319	1176
ENSG00000100239.16	PPP6R2	-0.388182	5.76943	29.0072	2.09531e-05	0.000332618	553	510	535	566	939	677	998	787
ENSG00000143373.18	ZNF687	-0.388234	5.88592	27.8773	2.70026e-05	0.000402567	585	506	628	601	1050	721	1010	862
ENSG00000071564.17	TCF3	-0.388313	7.41485	23.4773	7.709e-05	0.000913238	1603	1536	1900	1608	3135	1905	2955	2471
ENSG00000149428.19	HYOU1	-0.388435	8.2376	53.0001	2.75767e-07	1.32776e-05	3176	2988	2963	2894	5247	3936	5192	4475
ENSG00000149115.14	TNKS1BP1	-0.389507	7.00723	32.6642	9.58293e-06	0.000183601	1308	1171	1260	1305	2245	1546	2290	1860
ENSG00000184840.12	TMED9	-0.389556	7.42664	44.3034	1.09457e-06	3.65981e-05	1767	1557	1749	1636	2921	2213	2852	2533
ENSG00000139546.11	TARBP2	-0.390063	5.18741	29.1897	2.01229e-05	0.000321652	345	327	403	333	611	500	589	504
ENSG00000105221.18	AKT2	-0.390582	6.34692	35.1312	5.82703e-06	0.000124189	811	828	812	741	1406	975	1437	1203
ENSG00000094631.21	HDAC6	-0.390707	6.98085	45.1679	9.4673e-07	3.25949e-05	1228	1167	1221	1232	2076	1540	2175	1830
ENSG00000106290.15	TAF6	-0.39081	5.93992	27.3404	3.05256e-05	0.000443157	647	577	665	533	1071	757	1040	935
ENSG00000101680.15	LAMA1	-0.390839	6.80345	23.8154	7.08534e-05	0.000856584	1256	1071	1058	1154	1934	1356	2062	1794
ENSG00000198911.12	SREBF2	-0.39085	9.44486	56.9476	1.55561e-07	9.02871e-06	6846	6597	6847	6838	12103	8996	11946	9623
ENSG00000196235.14	SUPT5H	-0.390906	7.18829	44.2279	1.10864e-06	3.67306e-05	1516	1311	1471	1444	2527	1869	2508	2122
ENSG00000100034.14	PPM1F	-0.391685	5.29593	24.8689	5.47057e-05	0.000700517	375	363	397	355	661	435	655	593
ENSG00000130382.9	MLLT1	-0.391835	6.40389	28.4938	2.34953e-05	0.000362579	795	752	934	849	1541	1014	1490	1205
ENSG00000072958.9	AP1M1	-0.392164	6.25716	24.2697	6.33261e-05	0.000784422	790	595	822	719	1249	999	1328	1026
ENSG00000170873.19	MTSS1	-0.392407	5.62204	29.7615	1.7747e-05	0.000291746	500	504	521	468	861	601	869	802
ENSG00000132382.15	MYBBP1A	-0.392921	6.05913	28.1276	2.55137e-05	0.000384539	684	576	698	650	1162	799	1210	945
ENSG00000103510.20	KAT8	-0.39356	6.35338	39.3308	2.6244e-06	6.82863e-05	854	778	819	791	1415	1118	1359	1200
ENSG00000108774.15	RAB5C	-0.393699	6.85137	42.1206	1.59298e-06	4.68684e-05	1089	1087	1223	1062	1969	1559	1859	1616
ENSG00000109906.15	ZBTB16	-0.393997	6.06887	41.4016	1.80778e-06	5.19174e-05	684	653	662	603	1092	886	1189	928
ENSG00000141556.22	TBCD	-0.394019	6.77099	29.6706	1.81033e-05	0.000296737	1103	951	1063	1084	1790	1259	1960	1623
ENSG00000175063.17	UBE2C	-0.394066	6.5313	47.4598	6.5028e-07	2.46279e-05	910	895	904	872	1479	1242	1551	1350
ENSG00000004059.11	ARF5	-0.394132	7.57444	42.788	1.41834e-06	4.33407e-05	1811	1654	2001	1779	3092	2549	2988	2733
ENSG00000103932.12	RPAP1	-0.394185	5.95247	30.5507	1.49568e-05	0.000256079	680	588	605	585	1148	799	1087	846
ENSG00000167969.13	ECI1	-0.394287	5.54058	28.0865	2.57517e-05	0.000387255	452	393	439	480	804	560	753	663
ENSG00000197586.13	ENTPD6	-0.395047	5.67715	30.4217	1.53781e-05	0.000261834	458	484	547	478	845	640	928	690
ENSG00000026025.16	VIM	-0.395206	12.506	37.2669	3.85559e-06	9.10768e-05	51130	54757	63221	56745	96781	86698	95530	75283
ENSG00000007866.22	TEAD3	-0.395514	4.58932	23.2493	8.16322e-05	0.000955597	224	229	242	244	419	289	416	357
ENSG00000136699.20	SMPD4	-0.395748	6.76445	27.121	3.21076e-05	0.000460331	1155	961	1067	1089	1908	1271	1956	1623
ENSG00000088280.19	ASAP3	-0.395947	6.60707	52.5737	2.93901e-07	1.37672e-05	987	943	982	927	1656	1338	1684	1367
ENSG00000159433.12	STARD9	-0.396185	6.88817	27.58	2.88949e-05	0.000425056	1279	1190	1134	1217	2107	1462	2086	1949
ENSG00000198858.10	R3HDM4	-0.39631	5.59723	25.7348	4.44316e-05	0.000591104	508	437	476	459	902	582	817	672
ENSG00000146701.12	MDH2	-0.396795	7.82318	57.788	1.38232e-07	8.33759e-06	2195	2095	2240	2255	3707	3112	3709	3284
ENSG00000214253.9	FIS1	-0.397042	5.28819	27.8692	2.70521e-05	0.000402871	355	372	382	374	604	488	627	612
ENSG00000101198.15	NKAIN4	-0.398464	5.75472	31.7571	1.15746e-05	0.000210974	474	507	578	503	907	649	931	771
ENSG00000196182.11	STK40	-0.398581	7.11646	52.5013	2.97108e-07	1.38399e-05	1343	1340	1423	1302	2436	1775	2413	1927
ENSG00000116584.20	ARHGEF2	-0.399081	5.08538	25.1434	5.11915e-05	0.000663501	363	342	343	310	623	429	607	490
ENSG00000213780.11	GTF2H4	-0.399243	5.15743	28.7305	2.22835e-05	0.000348345	360	344	357	302	545	498	633	473
ENSG00000197157.11	SND1	-0.399289	7.98054	50.0549	4.31461e-07	1.78817e-05	2423	2439	2518	2357	4147	3548	4135	3501
ENSG00000105767.3	CADM4	-0.399464	6.11343	24.7335	5.65346e-05	0.000717634	692	627	687	636	1298	773	1135	984
ENSG00000102030.16	NAA10	-0.400056	5.27616	25.9964	4.17576e-05	0.000563298	402	340	411	369	673	479	646	606
ENSG00000116871.16	MAP7D1	-0.400546	7.05764	29.9329	1.70958e-05	0.000283243	1324	1174	1379	1269	2393	1567	2299	1905
ENSG00000104731.14	KLHDC4	-0.400755	4.88963	25.5844	4.60528e-05	0.00060916	322	289	293	300	568	378	541	423
ENSG00000030110.13	BAK1	-0.400922	4.69968	24.2559	6.35425e-05	0.000786399	260	248	255	238	473	365	381	359
ENSG00000187498.16	COL4A1	-0.401009	5.82963	26.193	3.98641e-05	0.000543396	563	559	576	497	958	671	1025	825
ENSG00000203879.12	GDI1	-0.401114	8.51326	47.5981	6.35965e-07	2.42183e-05	3772	3408	3769	3467	6193	4630	6377	5603
ENSG00000135912.11	TTLL4	-0.402228	5.44194	38.5209	3.04707e-06	7.61356e-05	421	426	465	407	719	572	759	666
ENSG00000178585.15	CTNNBIP1	-0.402329	5.60476	36.9282	4.1123e-06	9.53508e-05	494	451	489	450	811	605	862	707
ENSG00000166402.9	TUB	-0.402907	8.48795	61.0371	8.8585e-08	6.2884e-06	3687	3735	3450	3434	6151	5033	6041	5369
ENSG00000130165.10	ELOF1	-0.403721	5.29381	28.9138	2.1392e-05	0.000337072	377	360	397	362	682	467	615	604
ENSG00000136485.15	DCAF7	-0.403849	7.9692	61.4615	8.36934e-08	6.16665e-06	2426	2455	2531	2548	4412	3336	4379	3661
ENSG00000107957.16	SH3PXD2A	-0.404143	5.77506	36.1417	4.78337e-06	0.000106671	575	534	567	527	926	714	1055	803
ENSG00000112679.15	DUSP22	-0.404757	4.68765	23.5588	7.55332e-05	0.000900188	247	272	216	251	442	339	437	346
ENSG00000101493.11	ZNF516	-0.40493	6.55604	32.2299	1.04854e-05	0.000196806	901	939	959	894	1767	1101	1663	1350
ENSG00000123485.12	HJURP	-0.405103	5.18283	36.2854	4.6523e-06	0.000104422	367	391	361	349	610	488	649	577
ENSG00000122642.11	FKBP9	-0.405153	5.5124	33.665	7.80997e-06	0.000156115	446	449	432	454	759	593	808	665
ENSG00000235437.8	LINC01278	-0.405161	5.59495	33.5144	8.05213e-06	0.000159687	491	505	458	449	831	608	855	726
ENSG00000186716.21	BCR	-0.40528	6.37912	31.8522	1.13458e-05	0.000207882	821	711	906	815	1453	1016	1458	1241
ENSG00000141337.13	ARSG	-0.405579	5.47953	26.2648	3.91958e-05	0.000536199	447	428	395	441	734	661	747	567
ENSG00000173456.5	RNF26	-0.405744	5.94146	27.7286	2.79314e-05	0.000413146	577	532	657	559	1084	702	1066	850
ENSG00000128739.23	SNRPN	-0.40585	7.01049	47.444	6.51941e-07	2.46571e-05	1281	1195	1292	1198	2218	1678	2049	1919
ENSG00000142208.18	AKT1	-0.406048	7.13506	35.7528	5.15864e-06	0.000113167	1406	1243	1415	1398	2534	1695	2552	1931
ENSG00000011376.12	LARS2	-0.406406	5.20829	29.5358	1.86463e-05	0.000303125	403	367	343	339	589	560	622	524
ENSG00000153048.11	CARHSP1	-0.406516	6.77343	41.8767	1.66254e-06	4.83991e-05	1048	970	1180	1030	1841	1387	1902	1584
ENSG00000235823.3	OLMALINC	-0.40654	5.04299	26.3265	3.86318e-05	0.000530779	348	315	339	300	490	511	580	475
ENSG00000172046.19	USP19	-0.406805	6.30467	32.0155	1.09647e-05	0.000203185	866	704	787	809	1448	1010	1350	1224
ENSG00000178761.15	FAM219B	-0.407294	6.61418	51.3825	3.51824e-07	1.54853e-05	994	987	945	1011	1622	1355	1754	1512
ENSG00000125520.14	SLC2A4RG	-0.407735	6.56781	35.071	5.89662e-06	0.000124998	903	856	979	901	1557	1139	1697	1398
ENSG00000170653.19	ATF7	-0.407874	5.18435	28.8215	2.18361e-05	0.000342318	363	397	372	325	609	538	615	543
ENSG00000034053.15	APBA2	-0.408073	5.54551	26.5947	3.62807e-05	0.000505556	449	406	482	440	801	545	800	683
ENSG00000175467.15	SART1	-0.408441	6.07996	28.5148	2.33849e-05	0.00036148	661	565	692	695	1238	812	1164	954
ENSG00000101444.13	AHCY	-0.408954	8.03447	48.8376	5.22009e-07	2.09447e-05	2468	2357	2634	2488	4224	3797	4053	3655
ENSG00000175550.8	DRAP1	-0.409121	5.28633	25.4494	4.75635e-05	0.000624962	367	325	405	388	674	474	663	554
ENSG00000119772.18	DNMT3A	-0.409226	5.91207	28.3697	2.4159e-05	0.000369322	591	561	639	571	1021	699	1036	1000
ENSG00000149806.11	FAU	-0.409316	8.64409	42.5956	1.46645e-06	4.41771e-05	3976	3545	3863	4024	7013	5287	6462	5734
ENSG00000100083.19	GGA1	-0.409443	5.80127	32.6439	9.62319e-06	0.00018399	545	517	569	569	997	678	950	877
ENSG00000140988.16	RPS2	-0.409587	11.5724	51.7105	3.34719e-07	1.49947e-05	29546	27349	30323	29455	53934	39182	49798	42821
ENSG00000147130.14	ZMYM3	-0.409729	7.0109	43.9993	1.15242e-06	3.7802e-05	1401	1258	1294	1160	2189	1665	2268	2009
ENSG00000196642.19	RABL6	-0.410444	6.71985	27.1584	3.18318e-05	0.000457324	1021	870	1073	1058	1838	1183	1878	1533
ENSG00000133895.18	MEN1	-0.410538	5.52408	31.0555	1.34255e-05	0.0002353	454	459	474	413	835	554	796	685
ENSG00000100147.14	CCDC134	-0.410546	4.51006	24.4919	5.99669e-05	0.000752577	223	231	225	216	402	315	375	330
ENSG00000272325.2	NUDT3	-0.410617	6.81397	38.7476	2.92174e-06	7.37361e-05	1133	1051	1195	987	1906	1536	1927	1573
ENSG00000135924.17	DNAJB2	-0.410682	7.01227	46.4971	7.60212e-07	2.78392e-05	1327	1212	1285	1193	2259	1669	2182	1879
ENSG00000188186.10	LAMTOR4	-0.410894	5.53831	30.5609	1.4924e-05	0.000255895	422	410	444	428	754	552	757	651
ENSG00000132535.22	DLG4	-0.410982	5.7754	29.2217	1.99815e-05	0.000319761	566	477	600	515	941	676	968	853
ENSG00000146063.20	TRIM41	-0.411183	6.33568	29.5675	1.8517e-05	0.000301732	843	750	782	779	1413	979	1425	1217
ENSG00000167657.14	DAPK3	-0.411433	5.38215	23.114	8.44672e-05	0.000982965	431	349	409	424	785	503	721	571
ENSG00000241973.11	PI4KA	-0.411516	6.3714	25.8388	4.33463e-05	0.00057945	953	737	780	793	1454	1014	1500	1246
ENSG00000223705.9	NSUN5P1	-0.411808	6.73853	47.184	6.79882e-07	2.54092e-05	1134	1091	1048	1071	1877	1445	1953	1648
ENSG00000110514.19	MADD	-0.411875	5.81682	30.8316	1.40824e-05	0.00024428	559	523	621	506	958	685	969	905
ENSG00000089154.11	GCN1	-0.412357	7.1695	50.8683	3.80584e-07	1.62851e-05	1451	1374	1381	1471	2577	1947	2519	2017
ENSG00000103855.18	CD276	-0.41299	7.30881	32.7397	9.43494e-06	0.000181267	1564	1412	1669	1487	2900	1865	2688	2352
ENSG00000178952.11	TUFM	-0.413182	7.51681	52.3849	3.02341e-07	1.39273e-05	1815	1599	1784	1760	3122	2390	2970	2607
ENSG00000157741.15	UBN2	-0.413317	5.70695	33.195	8.59344e-06	0.000168905	564	515	561	526	1005	711	886	849
ENSG00000136878.14	USP20	-0.413464	5.86678	30.408	1.54236e-05	0.000262448	613	542	593	524	1101	710	966	854
ENSG00000129244.9	ATP1B2	-0.414061	6.52142	42.538	1.48117e-06	4.45237e-05	930	924	979	767	1558	1275	1511	1379
ENSG00000170889.14	RPS9	-0.41444	9.90599	52.4869	2.97747e-07	1.38399e-05	9132	8280	9493	9412	15554	12978	15422	13842
ENSG00000090971.5	NAT14	-0.414495	5.35714	23.9068	6.92644e-05	0.000842154	406	354	400	367	754	456	675	562
ENSG00000164929.17	BAALC	-0.414904	6.01966	45.1613	9.47766e-07	3.25949e-05	618	667	664	678	1166	986	1102	928
ENSG00000132589.16	FLOT2	-0.415042	6.12884	37.4661	3.71289e-06	8.8714e-05	682	651	737	618	1204	859	1226	1009
ENSG00000160293.17	VAV2	-0.416449	6.68207	34.779	6.2473e-06	0.000131127	1062	909	1068	928	1802	1217	1784	1551
ENSG00000155229.21	MMS19	-0.416749	6.13184	43.8019	1.19177e-06	3.87278e-05	672	699	724	640	1124	1024	1148	1052
ENSG00000138629.16	UBL7	-0.416955	5.03717	29.5562	1.85627e-05	0.0003023	336	291	326	287	512	450	556	460
ENSG00000182199.11	SHMT2	-0.417007	8.23455	52.7523	2.8615e-07	1.35276e-05	3050	2715	3053	3077	5382	4207	5226	4212
ENSG00000165175.16	MID1IP1	-0.417014	7.10322	51.342	3.54e-07	1.55071e-05	1353	1311	1326	1366	2424	1900	2418	1832
ENSG00000106479.11	ZNF862	-0.417701	5.17373	23.7736	7.15939e-05	0.000861772	412	321	341	366	666	445	646	553
ENSG00000213918.11	DNASE1	-0.417757	4.99242	30.581	1.48595e-05	0.000255089	345	290	299	307	550	410	550	476
ENSG00000106683.15	LIMK1	-0.417837	6.59532	30.1309	1.6376e-05	0.000274271	994	838	998	885	1774	1124	1666	1402
ENSG00000126602.11	TRAP1	-0.417934	7.23326	48.8405	5.21767e-07	2.09447e-05	1384	1364	1495	1475	2455	2140	2484	2044
ENSG00000142453.12	CARM1	-0.418019	7.11363	46.8934	7.12676e-07	2.64483e-05	1318	1251	1433	1303	2374	1735	2507	1897
ENSG00000136270.14	TBRG4	-0.418027	5.78578	48.0843	5.88317e-07	2.28575e-05	533	503	542	540	911	753	912	805
ENSG00000258634.3	RP4-773N10.4	-0.418496	5.13448	31.6119	1.19335e-05	0.000215124	357	357	352	352	630	454	636	551
ENSG00000145020.16	AMT	-0.418716	4.85952	26.4241	3.77575e-05	0.000522431	289	277	282	271	526	375	507	387
ENSG00000112640.16	PPP2R5D	-0.418757	5.64159	33.5774	7.94982e-06	0.000158111	448	532	464	476	837	652	798	777
ENSG00000141867.19	BRD4	-0.4191	6.83669	35.545	5.37222e-06	0.000116104	1200	1077	1179	1070	2110	1414	2082	1668
ENSG00000163482.12	STK36	-0.419695	5.29432	33.8264	7.55927e-06	0.000152313	409	364	385	389	607	524	727	617
ENSG00000175727.14	MLXIP	-0.419726	5.61166	24.2328	6.39045e-05	0.000789467	534	451	457	496	871	573	865	802
ENSG00000138002.16	IFT172	-0.420031	5.18464	33.1	8.76188e-06	0.000171067	393	344	343	356	602	496	626	572
ENSG00000253846.3	PCDHGA10	-0.420144	4.87857	24.0274	6.72256e-05	0.00082238	288	277	311	308	558	387	452	495
ENSG00000182378.15	PLCXD1	-0.420307	4.80903	23.2495	8.16277e-05	0.000955597	272	255	288	265	498	318	519	403
ENSG00000182378.15	PAR_Y_PLCXD1	-0.420307	4.80903	23.2495	8.16277e-05	0.000955597	272	255	288	265	498	318	519	403
ENSG00000233927.5	RPS28	-0.420318	8.78661	42.8124	1.41237e-06	4.32508e-05	4102	3791	4156	4643	7273	5779	7555	6162
ENSG00000157637.13	SLC38A10	-0.420329	5.42256	23.1194	8.43515e-05	0.000982031	400	366	445	402	771	478	773	577
ENSG00000165458.14	INPPL1	-0.420535	5.60299	24.2395	6.37996e-05	0.000788524	511	428	449	497	901	569	892	677
ENSG00000130508.11	PXDN	-0.420612	7.10355	38.2785	3.18763e-06	7.90057e-05	1371	1260	1415	1354	2367	1679	2548	2086
ENSG00000054611.14	TBC1D22A	-0.420901	4.41233	26.8024	3.45667e-05	0.000486765	208	191	197	219	362	288	368	289
ENSG00000250021.7	ARPIN-AP3S2	-0.42199	5.12136	31.6827	1.1757e-05	0.000213019	352	327	343	291	552	455	626	474
ENSG00000134590.14	RTL8C	-0.422137	6.47179	33.9774	7.33262e-06	0.00014883	882	780	968	789	1572	1077	1588	1265
ENSG00000181449.4	SOX2	-0.422165	8.35139	44.4752	1.0633e-06	3.58557e-05	3037	3202	3377	2944	5646	4170	5942	4449
ENSG00000267100.1	ILF3-DT	-0.422312	5.1351	31.4854	1.22559e-05	0.000219331	352	339	323	345	636	443	563	538
ENSG00000166333.14	ILK	-0.423099	6.05896	41.6693	1.72432e-06	4.97788e-05	659	590	681	689	1103	924	1128	1038
ENSG00000131773.14	KHDRBS3	-0.423387	5.31102	37.3203	3.8168e-06	9.04694e-05	393	363	396	363	613	583	635	588
ENSG00000168495.13	POLR3D	-0.42367	6.31264	55.5047	1.91108e-07	1.05015e-05	819	772	780	796	1387	1125	1383	1185
ENSG00000196730.13	DAPK1	-0.423883	5.55546	29.0155	2.09143e-05	0.000332193	467	449	486	443	817	570	815	762
ENSG00000048828.17	FAM120A	-0.423959	5.43992	36.9464	4.09803e-06	9.50998e-05	435	420	447	421	755	578	821	619
ENSG00000149260.18	CAPN5	-0.424403	7.13523	59.9725	1.02287e-07	6.85667e-06	1297	1314	1429	1290	2413	1896	2390	1867
ENSG00000205084.11	TMEM231	-0.425046	5.42332	42.4856	1.49474e-06	4.48342e-05	421	449	414	395	731	582	713	666
ENSG00000107223.13	EDF1	-0.425137	7.56612	49.9052	4.41606e-07	1.82748e-05	1877	1659	1856	1903	3200	2522	3101	2884
ENSG00000159685.11	CHCHD6	-0.425222	4.70819	26.2676	3.91703e-05	0.000536199	253	241	247	254	434	325	485	360
ENSG00000064490.14	RFXANK	-0.425318	5.30603	32.3575	1.02109e-05	0.000192699	392	365	383	343	624	525	639	589
ENSG00000121413.13	ZSCAN18	-0.425648	8.07709	43.0417	1.35754e-06	4.21072e-05	2627	2430	2734	2631	4924	3344	4817	3750
ENSG00000143374.17	TARS2	-0.42587	5.19332	26.2386	3.94385e-05	0.000538264	416	324	321	338	601	520	633	495
ENSG00000178719.17	GRINA	-0.426435	6.69065	31.211	1.2989e-05	0.000229923	978	946	1069	1002	1939	1177	1877	1474
ENSG00000140443.15	IGF1R	-0.426773	6.58906	39.6718	2.46593e-06	6.52047e-05	1021	955	836	925	1691	1237	1711	1390
ENSG00000130734.10	ATG4D	-0.426878	5.01538	23.4445	7.77264e-05	0.000919359	317	278	356	296	592	400	575	446
ENSG00000100154.14	TTC28	-0.427102	7.14437	42.7232	1.43434e-06	4.34462e-05	1405	1372	1406	1312	2482	1677	2474	2229
ENSG00000103248.19	MTHFSD	-0.4272	4.87471	25.1679	5.08901e-05	0.000660522	273	281	289	305	535	342	546	433
ENSG00000224861.1	YBX1P1	-0.42758	5.78974	30.112	1.64432e-05	0.000274744	526	470	568	498	949	622	942	816
ENSG00000092445.12	TYRO3	-0.427792	5.00069	31.7353	1.16278e-05	0.000211423	309	272	284	321	531	414	539	428
ENSG00000145912.9	NHP2	-0.427798	5.98543	48.9616	5.119e-07	2.0689e-05	613	576	621	604	1107	874	1033	870
ENSG00000117362.13	APH1A	-0.428212	7.27375	46.7999	7.23595e-07	2.68176e-05	1493	1353	1638	1507	2714	2128	2463	2320
ENSG00000167693.17	NXN	-0.428445	6.73709	43.4484	1.26593e-06	4.03368e-05	1003	954	1136	930	1734	1454	1878	1414
ENSG00000179094.16	PER1	-0.428683	6.58552	23.4871	7.69005e-05	0.000911383	993	788	978	920	1797	1091	1564	1494
ENSG00000088247.18	KHSRP	-0.428714	8.54749	43.6371	1.22574e-06	3.94635e-05	3667	3252	3799	3618	6777	4536	6582	5309
ENSG00000141699.11	RETREG3	-0.428998	5.01366	29.1237	2.04192e-05	0.000325449	312	312	309	329	623	404	544	468
ENSG00000099956.20	SMARCB1	-0.429107	7.49629	63.81	6.14384e-08	5.12326e-06	1677	1677	1897	1680	3048	2440	3091	2582
ENSG00000135686.13	KLHL36	-0.429473	5.47949	30.109	1.64539e-05	0.000274744	447	404	478	444	804	554	825	683
ENSG00000116991.11	SIPA1L2	-0.429501	7.9032	66.4802	4.36794e-08	4.01749e-06	2368	2413	2219	2365	4125	3298	4116	3548
ENSG00000172890.13	NADSYN1	-0.429602	6.19635	37.5841	3.63102e-06	8.71855e-05	807	687	711	684	1350	1014	1297	1006
ENSG00000126432.14	PRDX5	-0.429757	6.33221	28.4322	2.3822e-05	0.000366395	797	659	848	731	1369	959	1336	1233
ENSG00000125611.15	CHCHD5	-0.430256	5.34922	30.0747	1.65768e-05	0.000276146	375	362	428	384	679	544	681	591
ENSG00000127511.10	SIN3B	-0.430486	6.37222	30.9873	1.3622e-05	0.000238084	797	702	865	855	1548	990	1442	1233
ENSG00000081760.17	AACS	-0.430799	5.7166	40.169	2.25335e-06	6.12207e-05	534	466	476	525	893	748	880	706
ENSG00000056487.16	PHF21B	-0.430894	5.88961	30.5802	1.48621e-05	0.000255089	590	527	644	548	1053	706	1060	916
ENSG00000179262.10	RAD23A	-0.430922	6.22321	49.61	4.62395e-07	1.8976e-05	680	710	775	711	1319	967	1240	1113
ENSG00000158850.15	B4GALT3	-0.430969	5.72688	30.5309	1.50207e-05	0.000256855	567	439	516	531	926	708	921	762
ENSG00000006704.11	GTF2IRD1	-0.431277	5.53851	35.4798	5.44124e-06	0.00011723	463	396	497	451	789	640	837	652
ENSG00000100246.13	DNAL4	-0.431587	4.23884	23.4875	7.68927e-05	0.000911383	176	167	189	179	292	229	337	290
ENSG00000167468.18	GPX4	-0.432477	7.21206	53.9499	2.39618e-07	1.20835e-05	1364	1319	1512	1425	2578	1882	2439	2181
ENSG00000117411.18	B4GALT2	-0.43255	6.15795	39.9189	2.3577e-06	6.31266e-05	708	604	717	698	1255	885	1246	1031
ENSG00000169564.7	PCBP1	-0.432765	8.43857	69.0096	3.192e-08	3.30649e-06	3344	3250	3541	3209	5959	4845	5903	4834
ENSG00000117419.16	ERI3	-0.433978	5.42647	39.5724	2.51102e-06	6.60815e-05	422	373	455	386	721	586	747	591
ENSG00000167291.16	TBC1D16	-0.434126	7.03444	30.0798	1.65585e-05	0.000276146	1321	1147	1388	1234	2319	1499	2463	1994
ENSG00000123975.5	CKS2	-0.434268	4.9993	32.2636	1.0412e-05	0.000195693	300	336	349	285	559	488	535	464
ENSG00000160285.15	LSS	-0.434705	6.39132	36.103	4.81934e-06	0.000107167	807	766	797	800	1557	961	1446	1191
ENSG00000182484.15	WASH6P	-0.434857	4.68514	29.2544	1.98377e-05	0.000317828	249	238	260	270	455	320	465	408
ENSG00000182484.15	PAR_Y_WASH6P	-0.434857	4.68514	29.2544	1.98377e-05	0.000317828	249	238	260	270	455	320	465	408
ENSG00000135097.7	MSI1	-0.435212	7.78558	41.0268	1.93212e-06	5.4806e-05	2149	1946	2268	2084	3843	2691	4075	3125
ENSG00000102103.17	PQBP1	-0.43528	6.19887	36.1656	4.7613e-06	0.000106414	762	613	702	743	1226	1044	1245	1044
ENSG00000196465.10	MYL6B	-0.435738	6.57261	50.5141	4.01885e-07	1.69091e-05	905	842	986	899	1603	1250	1572	1446
ENSG00000151208.17	DLG5	-0.435919	7.19795	37.2364	3.87801e-06	9.15284e-05	1449	1292	1550	1450	2537	1748	2663	2370
ENSG00000168101.14	NUDT16L1	-0.435992	5.69608	29.4925	1.88241e-05	0.000305657	463	450	503	510	926	626	834	738
ENSG00000182196.14	ARL6IP4	-0.43639	7.11764	54.688	2.15092e-07	1.11933e-05	1381	1240	1360	1365	2462	1795	2407	2012
ENSG00000137411.19	VARS2	-0.436516	5.70247	36.3149	4.6259e-06	0.000104114	525	498	521	473	863	650	873	875
ENSG00000127837.10	AAMP	-0.436826	6.76928	45.5642	8.86358e-07	3.12597e-05	1061	964	1019	1088	1986	1386	1853	1492
ENSG00000162517.13	PEF1	-0.436993	6.04275	47.1765	6.8071e-07	2.54092e-05	667	632	659	597	1111	925	1107	987
ENSG00000166557.14	TMED3	-0.437135	5.87425	39.0288	2.77402e-06	7.1242e-05	560	536	576	568	1019	831	923	847
ENSG00000101439.9	CST3	-0.437234	5.42246	25.578	4.6123e-05	0.000609506	402	368	452	410	825	505	743	585
ENSG00000213977.8	TAX1BP3	-0.437299	4.71812	25.7832	4.39232e-05	0.000584903	248	234	250	248	463	330	412	383
ENSG00000156298.13	TSPAN7	-0.437541	5.76314	29.019	2.0898e-05	0.000332125	558	502	536	550	1074	683	861	864
ENSG00000092621.13	PHGDH	-0.437774	7.33948	46.3309	7.81175e-07	2.83817e-05	1534	1446	1578	1643	2909	2038	2892	2256
ENSG00000169228.14	RAB24	-0.438026	4.59035	24.4565	6.04893e-05	0.000756577	220	234	247	212	423	312	399	346
ENSG00000108799.13	EZH1	-0.438081	5.32017	26.9409	3.34733e-05	0.000474505	417	437	351	344	602	531	723	650
ENSG00000143761.16	ARF1	-0.438262	8.74577	54.8968	2.08665e-07	1.10457e-05	4144	3899	4308	4139	7996	5671	6980	6124
ENSG00000144535.20	DIS3L2	-0.43842	5.046	35.5732	5.34271e-06	0.000115919	327	300	331	284	574	413	562	468
ENSG00000125734.15	GPR108	-0.439151	4.75666	29.4582	1.89667e-05	0.000307431	276	229	277	253	465	347	462	406
ENSG00000116857.17	TMEM9	-0.439545	7.07383	61.3262	8.522e-08	6.19488e-06	1270	1228	1347	1308	2342	1826	2230	1959
ENSG00000099331.14	MYO9B	-0.439764	6.73907	36.5348	4.43415e-06	0.000101622	1083	961	1113	1020	1959	1290	1931	1627
ENSG00000179899.8	PHC1P1	-0.439911	5.19308	24.6583	5.75795e-05	0.000728559	345	323	383	339	613	427	672	551
ENSG00000132471.12	WBP2	-0.439955	6.4592	45.32	9.23045e-07	3.21845e-05	911	776	905	830	1570	1150	1525	1317
ENSG00000162430.18	SELENON	-0.439994	7.77627	59.4539	1.09784e-07	7.15148e-06	2112	1894	2243	2070	3810	2861	3697	3149
ENSG00000107882.12	SUFU	-0.440319	4.96574	34.243	6.95169e-06	0.000142773	331	290	311	286	516	433	582	448
ENSG00000143641.10	GALNT2	-0.44032	7.30523	61.0776	8.81049e-08	6.27767e-06	1512	1477	1620	1512	2733	2010	2796	2413
ENSG00000127445.14	PIN1	-0.440354	5.80374	36.0108	4.90625e-06	0.000108664	555	509	527	534	1040	664	933	825
ENSG00000151640.13	DPYSL4	-0.440368	6.47759	37.5889	3.62772e-06	8.71818e-05	847	787	905	848	1617	1063	1533	1306
ENSG00000116521.11	SCAMP3	-0.440373	5.77371	37.6635	3.57709e-06	8.63399e-05	544	463	535	516	940	721	939	747
ENSG00000105220.17	GPI	-0.440492	8.2939	38.544	3.03406e-06	7.59475e-05	3126	2726	3364	2869	5314	4022	5321	4954
ENSG00000112659.14	CUL9	-0.440602	5.3445	25.095	5.17922e-05	0.000669094	472	383	344	394	690	511	747	645
ENSG00000137818.12	RPLP1	-0.440735	10.2013	51.3448	3.53849e-07	1.55071e-05	11477	10312	11341	11370	20286	15122	19641	17301
ENSG00000184634.16	MED12	-0.441464	6.60881	58.1355	1.31691e-07	8.10194e-06	970	904	986	925	1676	1308	1793	1386
ENSG00000167747.15	C19orf48	-0.441573	6.39691	23.3237	8.01179e-05	0.000942653	805	657	855	818	1483	944	1419	1268
ENSG00000186350.12	RXRA	-0.442285	4.60901	27.0071	3.2964e-05	0.000469513	232	235	257	225	433	288	446	380
ENSG00000105270.15	CLIP3	-0.44251	6.30708	32.7437	9.42704e-06	0.000181241	810	762	847	657	1386	980	1358	1278
ENSG00000178802.18	MPI	-0.442943	6.09273	51.31	3.55732e-07	1.55583e-05	624	677	707	595	1169	939	1106	1009
ENSG00000115694.15	STK25	-0.442948	6.60455	51.3903	3.51405e-07	1.54853e-05	885	906	989	909	1660	1198	1704	1449
ENSG00000213923.13	CSNK1E	-0.4433	7.87577	55.1447	2.013e-07	1.08151e-05	2349	2141	2359	2118	4147	2911	4169	3412
ENSG00000165282.14	PIGO	-0.443966	5.05475	43.7247	1.20754e-06	3.90092e-05	313	329	339	293	559	452	585	477
ENSG00000071553.18	ATP6AP1	-0.44475	7.08769	56.2467	1.71834e-07	9.72848e-06	1249	1263	1431	1313	2415	1807	2211	2114
ENSG00000179134.15	SAMD4B	-0.44481	6.57785	50.2883	4.16138e-07	1.73767e-05	947	889	956	899	1664	1184	1739	1442
ENSG00000104859.15	CLASRP	-0.444869	5.85533	33.5275	8.03073e-06	0.000159377	608	476	542	582	992	731	1004	876
ENSG00000162738.6	VANGL2	-0.444884	8.7275	76.336	1.34967e-08	1.88716e-06	4095	4214	4267	4007	7409	5629	7723	6295
ENSG00000165724.6	ZMYND19	-0.445094	4.86648	30.4317	1.5345e-05	0.000261592	254	293	281	299	525	357	515	443
ENSG00000102935.12	ZNF423	-0.446396	6.4109	27.506	2.93883e-05	0.000430257	790	737	921	772	1511	931	1552	1284
ENSG00000179091.5	CYC1	-0.446962	6.25862	39.1671	2.70436e-06	6.98416e-05	720	659	770	756	1384	940	1331	1100
ENSG00000100058.12	CRYBB2P1	-0.447183	4.56578	23.1033	8.46948e-05	0.000984786	260	210	213	219	395	312	410	355
ENSG00000114268.12	PFKFB4	-0.44724	5.54955	30.8934	1.38976e-05	0.000241529	428	434	470	393	720	585	775	728
ENSG00000105373.19	NOP53	-0.447278	8.51298	54.744	2.13349e-07	1.11445e-05	3361	3187	3736	3388	6548	4816	6118	4870
ENSG00000089486.17	CDIP1	-0.447585	6.29708	45.7122	8.64908e-07	3.07381e-05	782	676	813	742	1328	1089	1251	1232
ENSG00000197183.14	NOL4L	-0.447873	6.24569	29.82	1.75219e-05	0.000289139	736	722	847	640	1320	882	1384	1231
ENSG00000197921.6	HES5	-0.447959	5.7181	23.0675	8.54642e-05	0.000991235	478	418	601	524	997	655	951	712
ENSG00000179314.15	WSCD1	-0.448242	7.77431	61.3233	8.52537e-08	6.19488e-06	2059	2014	2218	2198	3914	2864	3996	3131
ENSG00000166595.12	CIAO2B	-0.448611	5.63009	37.6368	3.59509e-06	8.65479e-05	473	453	480	475	881	666	776	744
ENSG00000172009.15	THOP1	-0.448882	5.59537	36.3624	4.5837e-06	0.000103423	478	441	461	456	845	570	905	694
ENSG00000141540.11	TTYH2	-0.448915	5.51117	25.8227	4.35121e-05	0.000580825	438	373	523	396	730	572	822	702
ENSG00000185800.12	DMWD	-0.449031	5.81672	24.5208	5.95454e-05	0.000748644	556	486	590	542	1058	628	1014	870
ENSG00000204410.16	MSH5	-0.449041	5.35834	29.813	1.75487e-05	0.000289139	403	438	404	385	764	525	767	615
ENSG00000123416.15	TUBA1B	-0.450006	10.8388	54.6937	2.14915e-07	1.11933e-05	16846	15553	19275	16356	31283	22877	31343	25922
ENSG00000205476.9	CCDC85C	-0.450242	6.39352	38.0063	3.354e-06	8.21004e-05	836	744	853	816	1552	1035	1420	1315
ENSG00000132017.10	DCAF15	-0.450285	5.546	30.1381	1.63502e-05	0.000274005	422	423	448	476	891	549	818	650
ENSG00000125503.13	PPP1R12C	-0.450337	5.59011	25.9705	4.20143e-05	0.000566017	491	397	499	471	868	576	918	693
ENSG00000173548.9	SNX33	-0.450345	5.33313	39.7806	2.41764e-06	6.44141e-05	421	369	365	366	664	536	680	605
ENSG00000128342.5	LIF	-0.450499	4.4092	27.3875	3.01973e-05	0.000439544	217	204	196	204	378	280	362	323
ENSG00000097021.20	ACOT7	-0.450623	6.34025	60.2299	9.87744e-08	6.68599e-06	772	747	793	716	1365	1076	1380	1132
ENSG00000170906.16	NDUFA3	-0.450656	5.1025	36.0432	4.87547e-06	0.000108068	325	306	340	328	574	426	599	527
ENSG00000174684.7	B4GAT1	-0.450666	5.54175	35.7322	5.17944e-06	0.000113444	385	467	494	401	806	578	799	676
ENSG00000214078.13	CPNE1	-0.451173	7.44267	50.387	4.0984e-07	1.72176e-05	1772	1522	1708	1711	3125	2202	2951	2720
ENSG00000013523.11	ANGEL1	-0.451235	4.74307	25.863	4.30984e-05	0.000576973	302	267	227	255	484	376	480	382
ENSG00000103495.14	MAZ	-0.452198	7.56707	30.6261	1.47162e-05	0.000253527	1806	1634	1954	1870	3382	2123	3626	2846
ENSG00000122140.11	MRPS2	-0.452442	5.79773	35.545	5.37221e-06	0.000116104	490	475	566	545	999	664	949	798
ENSG00000171603.18	CLSTN1	-0.452452	7.9246	52.2127	3.10272e-07	1.41281e-05	2299	2230	2524	2217	4190	2990	4399	3642
ENSG00000196405.13	EVL	-0.452892	7.24122	48.3974	5.59702e-07	2.20994e-05	1468	1402	1620	1402	2655	1911	2792	2316
ENSG00000078902.16	TOLLIP	-0.453024	5.35142	24.5485	5.91437e-05	0.00074427	391	360	424	425	823	487	725	600
ENSG00000184863.11	RBM33	-0.453031	7.1563	40.9449	1.96051e-06	5.5441e-05	1527	1396	1342	1355	2669	1873	2577	2118
ENSG00000148335.15	NTMT1	-0.45305	4.95478	29.811	1.75562e-05	0.000289139	307	251	309	273	521	385	499	462
ENSG00000112759.19	SLC29A1	-0.453256	7.26405	53.0125	2.75261e-07	1.32763e-05	1428	1402	1592	1294	2558	2037	2633	2136
ENSG00000116017.11	ARID3A	-0.453409	5.27564	32.8043	9.31009e-06	0.000179367	364	364	383	347	673	463	728	536
ENSG00000134824.14	FADS2	-0.454195	7.60733	59.5839	1.0785e-07	7.04206e-06	1877	1786	1896	1788	3362	2405	3551	2775
ENSG00000124702.18	KLHDC3	-0.454274	5.90351	38.0909	3.30126e-06	8.12404e-05	583	512	613	535	1041	720	989	930
ENSG00000103742.12	IGDCC4	-0.454314	4.84802	24.4527	6.05456e-05	0.000756577	297	274	289	279	549	325	517	483
ENSG00000079805.19	DNM2	-0.454335	6.72033	47.4657	6.49661e-07	2.46279e-05	1093	945	1013	985	1899	1309	1875	1558
ENSG00000239857.7	GET4	-0.454514	6.39859	32.1093	1.0752e-05	0.00020045	827	732	839	812	1592	967	1480	1253
ENSG00000197746.14	PSAP	-0.454569	9.89023	65.769	4.77848e-08	4.2813e-06	9137	8552	9677	8883	16611	12876	15604	14272
ENSG00000084207.18	GSTP1	-0.454586	7.6038	57.9859	1.34465e-07	8.18539e-06	1804	1711	1905	1812	3244	2407	3273	2942
ENSG00000125901.6	MRPS26	-0.454707	5.4581	37.526	3.67108e-06	8.79948e-05	434	405	406	441	793	536	814	635
ENSG00000136158.12	SPRY2	-0.454734	7.72721	74.2068	1.72136e-08	2.18314e-06	2021	2084	2143	2215	3657	3048	3703	3435
ENSG00000068120.15	COASY	-0.455238	5.90949	43.4968	1.25549e-06	4.01364e-05	607	554	562	579	1119	758	1018	891
ENSG00000103653.17	CSK	-0.455415	5.40818	32.4668	9.98209e-06	0.000189543	409	356	413	404	697	517	815	579
ENSG00000002586.20	CD99	-0.45567	5.61243	44.2809	1.09874e-06	3.66049e-05	463	412	506	471	803	665	834	733
ENSG00000002586.20	PAR_Y_CD99	-0.45567	5.61243	44.2809	1.09874e-06	3.66049e-05	463	412	506	471	803	665	834	733
ENSG00000183207.14	RUVBL2	-0.455684	6.23076	39.0039	2.78677e-06	7.1503e-05	671	597	757	754	1286	947	1244	1088
ENSG00000013441.16	CLK1	-0.456552	5.9941	25.1977	5.05268e-05	0.00065673	617	661	717	608	1274	1101	982	893
ENSG00000161642.18	ZNF385A	-0.456984	5.24044	28.7739	2.20689e-05	0.000345184	312	335	393	356	655	470	690	487
ENSG00000168763.16	CNNM3	-0.456989	5.17192	35.6885	5.22373e-06	0.000114082	360	351	358	329	681	462	581	572
ENSG00000178252.18	WDR6	-0.457174	7.94917	52.2137	3.10223e-07	1.41281e-05	2382	2217	2451	2540	4505	3155	4424	3722
ENSG00000161013.17	MGAT4B	-0.45791	5.96601	41.765	1.6955e-06	4.91003e-05	590	603	609	574	1180	802	1016	912
ENSG00000175573.7	C11orf68	-0.458012	4.49468	27.0043	3.29859e-05	0.000469513	216	214	196	189	400	265	367	311
ENSG00000213442.5	RPL18AP3	-0.45811	8.63733	75.3068	1.51705e-08	1.99998e-06	3699	3550	3728	3719	6580	5678	6459	5390
ENSG00000152284.5	TCF7L1	-0.458228	4.89028	26.8095	3.45096e-05	0.000486443	283	261	310	267	530	360	535	424
ENSG00000169515.8	CCDC8	-0.45823	4.84826	28.5772	2.30602e-05	0.000358463	268	273	273	280	539	331	524	414
ENSG00000155366.17	RHOC	-0.458384	6.40735	45.5146	8.93679e-07	3.14377e-05	785	755	871	789	1459	1174	1419	1204
ENSG00000013306.16	SLC25A39	-0.45909	6.03414	30.9224	1.38117e-05	0.00024064	638	564	664	614	1223	738	1144	994
ENSG00000165821.12	SALL2	-0.459121	8.30899	77.3756	1.20084e-08	1.78738e-06	3175	3070	3154	2951	5542	4250	5787	4766
ENSG00000078549.15	ADCYAP1R1	-0.459391	5.80011	50.7933	3.84991e-07	1.63977e-05	520	519	564	496	920	719	959	853
ENSG00000104960.15	PTOV1	-0.459406	6.93393	47.2276	6.75107e-07	2.53257e-05	1141	1020	1253	1123	2124	1468	2086	1805
ENSG00000141101.13	NOB1	-0.459412	6.33666	38.9756	2.80131e-06	7.18095e-05	750	674	825	805	1367	1224	1329	1091
ENSG00000132128.17	LRRC41	-0.459539	7.08667	60.0044	1.01844e-07	6.84358e-06	1348	1313	1335	1230	2564	1785	2309	1959
ENSG00000174227.16	PIGG	-0.459548	6.09826	38.4285	3.09986e-06	7.71065e-05	705	729	613	638	1263	894	1253	1021
ENSG00000128602.11	SMO	-0.459631	6.46694	50.3116	4.14646e-07	1.73406e-05	863	834	853	811	1578	1073	1582	1317
ENSG00000131748.16	STARD3	-0.46014	5.63917	35.8457	5.06618e-06	0.000111581	492	444	503	463	928	607	825	776
ENSG00000198792.13	TMEM184B	-0.460249	5.26178	27.0569	3.25867e-05	0.000465993	368	344	385	327	696	410	678	572
ENSG00000156860.16	FBRS	-0.460268	6.26185	24.7928	5.5725e-05	0.000710288	733	715	729	737	1527	799	1377	1135
ENSG00000073060.17	SCARB1	-0.460986	4.76879	31.2433	1.29001e-05	0.00022866	276	237	252	270	478	354	480	396
ENSG00000105726.17	ATP13A1	-0.461045	5.964	27.3149	3.0705e-05	0.000444829	640	560	610	565	1202	697	1132	908
ENSG00000071889.17	FAM3A	-0.461068	5.03916	28.9798	2.10808e-05	0.000333689	329	268	330	322	599	422	593	451
ENSG00000188735.13	TMEM120B	-0.461305	6.10687	34.9078	6.08987e-06	0.000128309	704	623	659	667	1249	802	1256	1083
ENSG00000130309.11	COLGALT1	-0.462147	6.32437	60.8014	9.14368e-08	6.39263e-06	706	785	796	756	1413	1041	1399	1169
ENSG00000067057.18	PFKP	-0.462433	5.30295	32.9521	9.03166e-06	0.000175099	365	351	412	385	668	478	691	658
ENSG00000196547.15	MAN2A2	-0.462445	6.43923	43.2272	1.3149e-06	4.12732e-05	888	769	859	820	1545	1066	1579	1329
ENSG00000141552.18	ANAPC11	-0.462772	5.47554	34.726	6.31333e-06	0.000132312	414	379	397	469	777	545	746	673
ENSG00000140067.6	FAM181A	-0.463067	4.92441	30.642	1.46663e-05	0.000252983	251	254	296	265	504	364	528	369
ENSG00000213722.10	DDAH2	-0.463416	7.89765	41.3704	1.81777e-06	5.21502e-05	2253	1983	2424	2327	4212	2977	4058	3608
ENSG00000184465.16	WDR27	-0.463685	5.65473	37.6525	3.58449e-06	8.64429e-05	553	485	490	456	927	670	928	757
ENSG00000103187.8	COTL1	-0.463777	7.44196	37.6242	3.6037e-06	8.66799e-05	1593	1479	1980	1512	2935	2131	3072	2703
ENSG00000079616.13	KIF22	-0.464423	6.44931	62.6746	7.12643e-08	5.57331e-06	823	796	867	790	1523	1106	1524	1266
ENSG00000105671.12	DDX49	-0.464478	5.48752	38.8307	2.87721e-06	7.30392e-05	436	376	467	416	778	621	774	626
ENSG00000140983.14	RHOT2	-0.46475	6.44424	23.2259	8.21155e-05	0.000960442	831	730	846	834	1635	927	1606	1231
ENSG00000105063.19	PPP6R1	-0.464926	5.92841	40.9214	1.96877e-06	5.56042e-05	576	544	579	605	1122	738	1121	846
ENSG00000141696.13	P3H4	-0.465939	5.1792	27.7072	2.8068e-05	0.000414655	353	333	366	311	676	419	637	530
ENSG00000140400.17	MAN2C1	-0.466002	7.30869	34.1305	7.11033e-06	0.000145491	1598	1361	1520	1610	2997	1883	2816	2422
ENSG00000069020.18	MAST4	-0.466104	3.78983	24.0027	6.76374e-05	0.000826729	140	128	124	131	227	181	258	200
ENSG00000169682.18	SPNS1	-0.466491	5.56098	32.0091	1.09793e-05	0.00020326	417	416	497	430	897	556	831	641
ENSG00000117394.24	SLC2A1	-0.466548	9.05922	47.8849	6.07367e-07	2.33866e-05	5281	5153	5237	5096	9230	6839	9719	8595
ENSG00000146540.15	C7orf50	-0.46657	6.51795	36.7527	4.2526e-06	9.81111e-05	841	763	930	817	1645	1067	1541	1308
ENSG00000187535.14	IFT140	-0.466637	5.59258	28.5242	2.33356e-05	0.00036092	442	416	510	417	820	525	868	749
ENSG00000149257.16	SERPINH1	-0.466704	7.70381	50.0911	4.29041e-07	1.78348e-05	2100	1988	2104	1716	3868	2734	3379	3097
ENSG00000131116.12	ZNF428	-0.466872	5.96316	24.6306	5.79691e-05	0.000732151	589	572	644	550	1184	643	1133	961
ENSG00000088038.19	CNOT3	-0.467227	5.94174	39.5453	2.52346e-06	6.62199e-05	624	554	636	551	1091	747	1154	935
ENSG00000095059.16	DHPS	-0.467368	6.16476	50.7249	3.89054e-07	1.65199e-05	681	622	722	700	1251	985	1144	1117
ENSG00000162191.14	UBXN1	-0.467499	6.97349	60.7356	9.22496e-08	6.41691e-06	1162	1069	1238	1220	2097	1789	2102	1758
ENSG00000174915.12	PTDSS2	-0.467707	4.86169	25.3788	4.83744e-05	0.000633513	229	252	331	277	498	369	527	411
ENSG00000174307.7	PHLDA3	-0.467881	5.1284	31.9212	1.1183e-05	0.000205579	316	293	365	338	657	456	586	477
ENSG00000013810.21	TACC3	-0.468307	5.90914	46.9796	7.02774e-07	2.61395e-05	570	534	588	572	986	749	1129	894
ENSG00000174775.18	HRAS	-0.468522	4.3746	26.9741	3.32167e-05	0.000472076	203	170	203	198	365	284	310	319
ENSG00000196361.10	ELAVL3	-0.469067	6.71685	35.1246	5.83462e-06	0.000124232	1068	907	1161	938	1997	1296	1907	1576
ENSG00000160305.18	DIP2A	-0.469115	5.91866	29.3479	1.94327e-05	0.000312667	664	565	547	584	1115	720	1045	1037
ENSG00000002822.16	MAD1L1	-0.469212	4.55395	31.1696	1.31037e-05	0.000231657	237	197	226	220	425	319	391	324
ENSG00000197283.18	SYNGAP1	-0.469277	6.54084	31.4151	1.24394e-05	0.000222184	984	831	917	872	1674	1087	1714	1519
ENSG00000197122.12	SRC	-0.469476	6.1844	31.1409	1.31837e-05	0.00023233	698	584	788	677	1312	852	1255	1144
ENSG00000163346.17	PBXIP1	-0.469633	4.72959	25.8879	4.28446e-05	0.000574912	204	262	278	239	449	331	439	408
ENSG00000143224.18	PPOX	-0.469699	4.58519	25.8893	4.28305e-05	0.000574912	213	215	259	240	470	306	432	334
ENSG00000163545.11	NUAK2	-0.469777	5.86325	39.1383	2.71869e-06	7.01463e-05	556	518	634	504	1007	800	1048	813
ENSG00000093010.15	COMT	-0.470117	5.42797	40.4721	2.13363e-06	5.90106e-05	374	378	421	435	743	574	772	582
ENSG00000160767.21	FAM189B	-0.470626	5.99426	35.0599	5.90953e-06	0.000125113	582	587	672	523	1126	759	1202	854
ENSG00000168268.11	NT5DC2	-0.470966	7.20483	64.2141	5.83069e-08	4.93089e-06	1340	1281	1471	1434	2588	1884	2530	2177
ENSG00000196562.14	SULF2	-0.470992	6.17641	37.1298	3.95736e-06	9.27683e-05	826	711	662	677	1322	1086	1348	1020
ENSG00000141456.16	PELP1	-0.471367	6.88902	50.6836	3.91532e-07	1.65742e-05	1193	1036	1142	1128	2159	1497	2164	1679
ENSG00000154832.16	CXXC1	-0.472158	5.33458	26.3999	3.79724e-05	0.000524061	404	335	408	384	770	470	759	560
ENSG00000102226.10	USP11	-0.472317	8.88247	76.8094	1.27954e-08	1.84037e-06	4659	4146	4602	4416	8233	6221	8245	6934
ENSG00000233016.7	SNHG7	-0.47233	6.30148	68.8482	3.25568e-08	3.30649e-06	760	739	784	766	1409	1092	1411	1154
ENSG00000237649.8	KIFC1	-0.472438	5.47986	38.6487	2.9757e-06	7.48251e-05	445	404	432	402	776	524	811	692
ENSG00000178057.15	NDUFAF3	-0.47248	4.9936	32.6979	9.51646e-06	0.00018258	338	299	295	306	582	436	583	459
ENSG00000053438.11	NNAT	-0.472836	7.93423	30.9875	1.36214e-05	0.000238084	2203	1879	2823	2188	4192	3093	4505	3364
ENSG00000010322.16	NISCH	-0.472994	7.8747	59.8407	1.04138e-07	6.91381e-06	2296	2088	2413	2201	4299	2978	4257	3466
ENSG00000127054.21	INTS11	-0.473988	7.00801	37.7848	3.49634e-06	8.48346e-05	1310	1113	1214	1262	2473	1517	2260	1938
ENSG00000107833.10	NPM3	-0.474045	4.82493	37.0214	4.03984e-06	9.42232e-05	260	286	264	255	474	390	452	448
ENSG00000130158.14	DOCK6	-0.474526	7.98129	62.0897	7.69851e-08	5.83927e-06	2470	2276	2379	2349	4607	3172	4516	3532
ENSG00000078808.19	SDF4	-0.474603	6.59757	43.8081	1.1905e-06	3.87278e-05	949	775	998	946	1719	1255	1768	1378
ENSG00000196365.12	LONP1	-0.47486	6.88917	42.6761	1.44612e-06	4.37071e-05	1195	964	1177	1173	2241	1539	2026	1716
ENSG00000177239.16	MAN1B1	-0.474983	6.35843	47.1875	6.79505e-07	2.54092e-05	813	706	800	740	1482	992	1439	1194
ENSG00000170430.10	MGMT	-0.475551	4.23399	26.3565	3.83606e-05	0.000528102	183	169	207	164	336	265	344	259
ENSG00000141570.11	CBX8	-0.475821	4.35835	25.5798	4.61029e-05	0.000609506	197	180	194	190	366	239	365	301
ENSG00000175634.15	RPS6KB2	-0.47597	5.55987	30.7417	1.43559e-05	0.000248402	488	389	475	436	890	569	797	728
ENSG00000116260.17	QSOX1	-0.475974	5.4521	35.858	5.05401e-06	0.000111402	430	392	420	405	779	532	803	638
ENSG00000196976.7	LAGE3	-0.476173	3.84259	23.9472	6.85746e-05	0.000837076	132	136	127	116	238	187	248	179
ENSG00000060971.19	ACAA1	-0.476192	4.76853	40.9113	1.97231e-06	5.56042e-05	259	258	252	262	485	360	465	407
ENSG00000130640.15	TUBGCP2	-0.476381	6.45877	45.6	8.8112e-07	3.11381e-05	809	784	842	857	1582	1029	1583	1312
ENSG00000100994.12	PYGB	-0.476534	7.21028	50.8826	3.79747e-07	1.62745e-05	1397	1299	1438	1436	2636	1774	2549	2337
ENSG00000103266.11	STUB1	-0.477027	5.19313	34.119	7.12681e-06	0.000145721	348	295	346	351	656	461	628	494
ENSG00000179115.11	FARSA	-0.47716	5.4366	51.2908	3.56774e-07	1.55793e-05	398	382	452	398	749	608	735	620
ENSG00000019144.19	PHLDB1	-0.477214	5.68998	30.54	1.49912e-05	0.00025651	533	476	523	447	912	588	1018	797
ENSG00000112715.25	VEGFA	-0.477979	7.26241	39.4808	2.55338e-06	6.66653e-05	1579	1457	1602	1480	2781	1939	2865	2629
ENSG00000196924.19	FLNA	-0.478209	9.43404	39.4013	2.59076e-06	6.74742e-05	6616	5726	7197	6277	12708	8288	12745	9582
ENSG00000167930.17	FAM234A	-0.478363	6.72419	48.0069	5.95635e-07	2.3031e-05	995	882	1063	969	1927	1302	1834	1479
ENSG00000117448.14	AKR1A1	-0.478685	6.83007	79.6467	9.34289e-09	1.54946e-06	1048	1061	1088	1106	1974	1593	1880	1714
ENSG00000142669.15	SH3BGRL3	-0.478821	5.14235	26.3923	3.80403e-05	0.000524474	323	295	383	320	621	446	542	588
ENSG00000148180.21	GSN	-0.479145	6.50784	43.4263	1.27074e-06	4.03908e-05	836	784	951	769	1659	1087	1554	1290
ENSG00000112511.18	PHF1	-0.479436	6.36306	62.0952	7.69293e-08	5.83927e-06	811	727	800	780	1454	1155	1415	1178
ENSG00000120725.13	SIL1	-0.479617	5.49222	43.8531	1.18143e-06	3.85253e-05	415	431	429	377	783	579	723	669
ENSG00000147144.13	CCDC120	-0.479741	4.14815	26.6005	3.62315e-05	0.000505556	172	167	161	156	316	216	324	243
ENSG00000197724.11	PHF2	-0.47991	6.17404	44.0008	1.15213e-06	3.7802e-05	730	658	691	677	1262	862	1309	1178
ENSG00000133275.16	CSNK1G2	-0.480082	6.11139	32.1486	1.06643e-05	0.000199267	636	589	671	683	1304	758	1212	1055
ENSG00000204842.18	ATXN2	-0.480779	5.96391	63.5371	6.36576e-08	5.21409e-06	649	644	646	613	1168	873	1216	1011
ENSG00000157881.16	PANK4	-0.480944	4.92545	32.0225	1.09487e-05	0.000203024	272	292	325	309	579	389	565	473
ENSG00000053371.13	AKR7A2	-0.481562	5.50569	38.0662	3.3166e-06	8.1473e-05	404	383	481	421	803	565	774	683
ENSG00000176946.12	THAP4	-0.48161	6.01672	58.0783	1.32745e-07	8.14865e-06	601	566	610	650	1126	869	1165	904
ENSG00000111276.12	CDKN1B	-0.481845	6.55791	63.4048	6.47644e-08	5.25807e-06	823	906	983	932	1701	1369	1603	1405
ENSG00000125755.19	SYMPK	-0.481877	6.71222	57.493	1.44061e-07	8.57708e-06	1013	962	972	1031	1917	1319	1900	1539
ENSG00000125970.12	RALY	-0.48226	7.62738	62.4717	7.31948e-08	5.67619e-06	1914	1676	2053	1764	3503	2675	3309	2891
ENSG00000007520.4	TSR3	-0.482894	5.29287	31.1155	1.32551e-05	0.000233439	374	330	408	372	721	464	733	576
ENSG00000010256.11	UQCRC1	-0.482936	7.24527	64.7658	5.43092e-08	4.7179e-06	1407	1284	1505	1475	2615	2064	2595	2210
ENSG00000120915.14	EPHX2	-0.483222	4.67371	26.708	3.53342e-05	0.000495417	242	214	241	272	449	307	452	416
ENSG00000214022.12	REPIN1	-0.483522	6.98764	32.9631	9.01126e-06	0.000174826	1169	1056	1373	1185	2404	1435	2330	1885
ENSG00000115317.12	HTRA2	-0.483739	4.36802	33.0769	8.80341e-06	0.000171635	184	182	191	207	334	263	358	323
ENSG00000196535.17	MYO18A	-0.48403	5.45243	38.0316	3.33813e-06	8.18566e-05	454	370	431	373	746	559	804	623
ENSG00000130985.17	UBA1	-0.484048	9.46527	92.4037	2.51601e-09	7.99751e-07	6678	6714	6888	6292	12469	9440	12323	10283
ENSG00000109103.12	UNC119	-0.484147	7.07743	68.5295	3.38548e-08	3.37148e-06	1330	1198	1323	1213	2302	1796	2284	2086
ENSG00000158545.16	ZC3H18	-0.484531	6.38916	46.5861	7.4924e-07	2.75103e-05	900	738	829	749	1496	1104	1583	1220
ENSG00000174886.14	NDUFA11	-0.484563	5.54527	44.2181	1.11048e-06	3.67306e-05	430	392	475	442	822	599	813	682
ENSG00000221829.10	FANCG	-0.484874	5.09219	35.1089	5.85269e-06	0.000124353	336	272	352	300	592	463	601	457
ENSG00000187051.9	RPS19BP1	-0.48494	5.44391	45.842	8.46562e-07	3.01248e-05	432	376	407	377	783	564	702	619
ENSG00000108107.15	RPL28	-0.485155	9.85413	70.8204	2.56386e-08	2.86211e-06	8992	7966	9425	8809	16411	12503	16333	13764
ENSG00000114988.12	LMAN2L	-0.485198	4.86398	30.2837	1.58428e-05	0.000267444	285	266	317	235	464	433	485	456
ENSG00000137106.18	GRHPR	-0.485341	6.88168	55.4885	1.91556e-07	1.05015e-05	1122	1014	1253	1088	1916	1747	2112	1707
ENSG00000100417.12	PMM1	-0.485604	4.54306	25.8013	4.37347e-05	0.000582953	225	176	244	236	391	323	381	377
ENSG00000243279.4	PRAF2	-0.486242	6.04188	47.5649	6.39371e-07	2.43145e-05	689	579	643	593	1254	885	1102	962
ENSG00000139182.15	CLSTN3	-0.486351	6.58968	35.5147	5.40425e-06	0.000116615	976	843	964	881	1803	1097	1701	1566
ENSG00000071246.11	VASH1	-0.486404	5.4707	33.1442	8.68313e-06	0.000170129	456	379	415	427	757	518	854	695
ENSG00000129355.7	CDKN2D	-0.486767	4.04424	25.857	4.31595e-05	0.000577232	168	149	163	151	308	212	290	250
ENSG00000104823.9	ECH1	-0.487033	5.68504	57.0137	1.54116e-07	8.98252e-06	498	437	506	472	833	731	885	753
ENSG00000175115.13	PACS1	-0.48725	5.70163	45.4465	9.03842e-07	3.16745e-05	540	493	530	429	887	689	944	821
ENSG00000137070.18	IL11RA	-0.487254	4.66255	26.0728	4.10102e-05	0.00055492	216	224	258	242	450	297	450	384
ENSG00000091542.9	ALKBH5	-0.487298	6.38528	48.7316	5.30822e-07	2.12367e-05	813	776	840	741	1603	1038	1421	1269
ENSG00000116604.18	MEF2D	-0.487453	4.63692	26.2825	3.90333e-05	0.000535026	283	235	222	228	465	302	464	399
ENSG00000169093.16	ASMTL	-0.487739	4.91119	39.4817	2.55295e-06	6.66653e-05	304	264	275	270	547	410	515	399
ENSG00000169093.16	PAR_Y_ASMTL	-0.487739	4.91119	39.4817	2.55295e-06	6.66653e-05	304	264	275	270	547	410	515	399
ENSG00000187954.13	CYHR1	-0.487761	5.4941	32.2801	1.03765e-05	0.000195291	458	379	431	424	879	532	754	685
ENSG00000134595.9	SOX3	-0.487898	6.02943	32.3628	1.01997e-05	0.000192619	594	633	568	712	1144	884	1276	920
ENSG00000196422.11	PPP1R26	-0.487915	4.96954	30.0961	1.65001e-05	0.00027535	320	255	319	285	596	380	532	476
ENSG00000153815.17	CMIP	-0.488603	5.70128	31.2634	1.28454e-05	0.00022811	482	469	549	487	890	613	941	895
ENSG00000142409.6	ZNF787	-0.488626	5.19998	27.217	3.14047e-05	0.000451891	336	296	409	350	711	438	668	530
ENSG00000158292.7	GPR153	-0.488698	5.12175	32.6385	9.63384e-06	0.000184007	313	289	365	317	610	420	658	478
ENSG00000004478.8	FKBP4	-0.489487	8.74913	93.8479	2.18931e-09	7.47769e-07	4128	3964	4169	4070	7228	6295	7435	6409
ENSG00000147065.17	MSN	-0.489535	8.68212	93.641	2.23312e-09	7.47769e-07	4147	4021	3970	3891	7184	5807	7276	6621
ENSG00000171130.19	ATP6V0E2	-0.490285	4.64878	26.1538	4.02336e-05	0.000547355	230	211	258	227	450	281	446	385
ENSG00000105397.14	TYK2	-0.490427	5.74475	49.1363	4.98016e-07	2.02164e-05	549	479	546	493	1016	748	914	798
ENSG00000105808.18	RASA4	-0.490682	5.77555	25.2789	4.95487e-05	0.000645836	590	437	519	517	1041	597	1001	853
ENSG00000164062.13	APEH	-0.490706	6.42847	67.5224	3.83422e-08	3.64778e-06	767	773	876	779	1514	1168	1397	1284
ENSG00000173992.9	CCS	-0.490777	4.55534	27.1024	3.22463e-05	0.00046208	210	218	234	236	418	285	412	396
ENSG00000136444.10	RSAD1	-0.491111	5.6428	58.6928	1.21899e-07	7.65255e-06	507	479	451	463	851	720	911	714
ENSG00000204580.14	DDR1	-0.491177	10.2255	64.5767	5.5645e-08	4.75472e-06	10972	10289	12401	10726	21446	15481	20523	17333
ENSG00000182173.14	TSEN54	-0.491275	3.90897	25.7895	4.38567e-05	0.000584299	136	137	132	150	256	201	260	217
ENSG00000104969.11	SGTA	-0.491282	7.33677	56.4113	1.67853e-07	9.55813e-06	1537	1369	1579	1541	3012	2007	2747	2402
ENSG00000141568.21	FOXK2	-0.491464	6.51911	60.5716	9.4313e-08	6.49517e-06	881	833	927	882	1747	1221	1605	1366
ENSG00000130313.7	PGLS	-0.49202	5.50534	36.1395	4.78545e-06	0.000106671	404	361	484	413	822	618	762	598
ENSG00000103264.18	FBXO31	-0.492125	5.03355	29.9892	1.68876e-05	0.000280127	359	258	336	305	606	433	581	501
ENSG00000178467.18	P4HTM	-0.492421	5.24302	32.0787	1.08208e-05	0.000201162	384	310	365	337	653	444	728	538
ENSG00000005108.16	THSD7A	-0.493273	5.01787	33.8288	7.55551e-06	0.000152313	314	296	371	322	555	440	653	548
ENSG00000178950.17	GAK	-0.493341	6.19866	32.9966	8.94947e-06	0.000174115	773	635	668	693	1399	847	1317	1128
ENSG00000171425.10	ZNF581	-0.494014	4.9171	31.9371	1.1146e-05	0.000205367	273	253	260	315	508	377	545	431
ENSG00000117298.16	ECE1	-0.494186	6.50138	55.949	1.79299e-07	1.00483e-05	863	799	921	828	1655	1145	1516	1436
ENSG00000166444.19	DENND2B	-0.494551	5.70602	40.3732	2.17192e-06	5.95934e-05	535	457	567	439	918	685	929	836
ENSG00000108773.11	KAT2A	-0.494659	8.2695	71.8482	2.26836e-08	2.61665e-06	3129	2787	2916	2830	5454	4060	5449	4727
ENSG00000108018.16	SORCS1	-0.495035	4.90579	36.4037	4.54744e-06	0.000102807	290	336	288	288	558	385	572	515
ENSG00000101473.17	ACOT8	-0.495333	4.50097	36.9042	4.13122e-06	9.57095e-05	202	211	212	224	416	299	390	329
ENSG00000169738.8	DCXR	-0.495425	6.71306	46.0766	8.14466e-07	2.92838e-05	1029	852	1026	990	1909	1385	1791	1502
ENSG00000082641.16	NFE2L1	-0.495912	8.0884	84.1429	5.77814e-09	1.24006e-06	2748	2517	2657	2468	4937	3722	4793	4096
ENSG00000146950.13	SHROOM2	-0.495957	6.12706	43.2445	1.31098e-06	4.12732e-05	719	630	692	636	1318	850	1287	1082
ENSG00000102119.12	EMD	-0.496202	7.43586	63.587	6.32456e-08	5.21117e-06	1621	1540	1828	1543	2996	2313	3033	2677
ENSG00000063177.13	RPL18	-0.496329	10.7575	73.1067	1.9561e-08	2.33425e-06	16691	14816	16093	16506	30599	23066	29017	25605
ENSG00000149925.22	ALDOA	-0.496482	9.70588	48.1383	5.83272e-07	2.27435e-05	7313	6760	8913	7808	14365	10737	14549	12389
ENSG00000086015.22	MAST2	-0.496486	6.83727	62.7574	7.04929e-08	5.54232e-06	1147	1122	1019	992	1987	1466	2099	1693
ENSG00000108797.12	CNTNAP1	-0.496899	5.30329	34.145	7.08967e-06	0.000145176	414	350	381	333	695	464	742	605
ENSG00000167674.15	HDGFL2	-0.497257	6.75988	49.6063	4.62662e-07	1.8976e-05	1063	906	1113	998	1989	1390	1995	1546
ENSG00000165802.23	NSMF	-0.497327	6.08694	32.1295	1.0707e-05	0.000199746	674	589	673	642	1333	792	1189	1061
ENSG00000116990.11	MYCL	-0.497433	5.15193	39.7116	2.44816e-06	6.49207e-05	334	327	339	386	650	463	693	544
ENSG00000105605.8	CACNG7	-0.497684	5.63039	26.2821	3.90375e-05	0.000535026	449	470	493	443	876	536	906	827
ENSG00000105698.16	USF2	-0.497735	5.92402	38.9253	2.8274e-06	7.23444e-05	565	574	612	542	1171	727	1102	893
ENSG00000068001.14	HYAL2	-0.497819	5.90586	30.1092	1.64532e-05	0.000274744	528	512	627	551	1106	652	1066	941
ENSG00000169100.14	SLC25A6	-0.497883	8.62713	53.7788	2.45727e-07	1.22136e-05	3655	3207	3956	3695	7271	4870	6747	5726
ENSG00000169100.14	PAR_Y_SLC25A6	-0.497883	8.62713	53.7788	2.45727e-07	1.22136e-05	3655	3207	3956	3695	7271	4870	6747	5726
ENSG00000214655.11	ZSWIM8	-0.497981	6.87703	30.8939	1.38961e-05	0.000241529	1236	1038	1151	1075	2407	1329	2090	1831
ENSG00000084774.14	CAD	-0.498084	7.76788	79.8276	9.16025e-09	1.54635e-06	2180	1945	2127	2049	3864	3031	3947	3204
ENSG00000164054.16	SHISA5	-0.498775	7.25053	48.1847	5.78967e-07	2.26394e-05	1476	1330	1523	1310	2948	1834	2568	2224
ENSG00000135596.18	MICAL1	-0.498911	5.28393	26.9	3.37924e-05	0.000478539	345	337	408	371	660	444	713	658
ENSG00000110844.14	PRPF40B	-0.49934	5.14468	45.5955	8.81786e-07	3.11381e-05	356	338	330	339	633	455	649	572
ENSG00000255769.7	GOLGA2P10	-0.499742	4.91197	39.3026	2.63797e-06	6.83823e-05	277	290	285	287	531	380	537	481
ENSG00000185883.12	ATP6V0C	-0.500232	6.08747	38.0006	3.35758e-06	8.21153e-05	637	603	693	582	1277	768	1252	986
ENSG00000141503.17	MINK1	-0.500243	6.41852	49.4572	4.73568e-07	1.93374e-05	829	746	860	786	1533	1084	1536	1311
ENSG00000139637.14	MYG1	-0.500531	5.37252	48.0805	5.88672e-07	2.28575e-05	364	367	404	396	701	540	739	614
ENSG00000099797.15	TECR	-0.500921	5.71601	42.7559	1.42626e-06	4.34101e-05	537	425	515	469	931	662	935	776
ENSG00000075240.17	GRAMD4	-0.501066	4.42859	25.0371	5.25217e-05	0.000676623	201	164	218	216	370	263	371	350
ENSG00000073849.16	ST6GAL1	-0.501114	4.29732	30.5569	1.49368e-05	0.000255895	161	204	184	189	320	265	351	312
ENSG00000137726.17	FXYD6	-0.501257	6.51341	23.5055	7.65472e-05	0.000909142	917	728	896	909	1668	1002	1586	1606
ENSG00000167614.14	TTYH1	-0.501303	7.5731	46.199	7.98255e-07	2.88885e-05	1617	1571	2009	1576	3381	2240	3200	2686
ENSG00000108557.19	RAI1	-0.501314	6.62394	35.0586	5.91107e-06	0.000125113	904	859	1059	875	1861	1127	1819	1490
ENSG00000101940.18	WDR13	-0.501331	5.77807	39.7758	2.41975e-06	6.44141e-05	524	453	555	519	1062	677	928	818
ENSG00000166987.15	MBD6	-0.502096	5.37885	25.3233	4.90228e-05	0.000639283	442	384	379	359	769	489	802	607
ENSG00000030582.18	GRN	-0.502295	6.07036	29.4416	1.9036e-05	0.000308374	617	539	742	524	1175	808	1130	997
ENSG00000266962.2	HSD17B1-AS1	-0.503025	3.84016	25.6354	4.54961e-05	0.000603816	138	126	127	130	255	175	241	214
ENSG00000161016.18	RPL8	-0.503264	10.8384	76.1523	1.378e-08	1.90749e-06	17124	15232	17113	17357	32187	24220	30685	26383
ENSG00000012822.16	CALCOCO1	-0.503272	4.92999	32.0988	1.07757e-05	0.000200623	319	284	292	239	513	413	526	469
ENSG00000198435.4	NRARP	-0.504045	4.88433	33.6815	7.78388e-06	0.000155818	275	270	329	267	559	363	562	459
ENSG00000105576.16	TNPO2	-0.504294	7.81384	70.8895	2.54272e-08	2.85441e-06	2325	2039	2146	2059	4059	2992	4046	3473
ENSG00000177830.18	CHID1	-0.50452	6.14294	52.2188	3.09985e-07	1.41281e-05	625	594	706	660	1228	886	1212	1067
ENSG00000182872.16	RBM10	-0.504566	6.80193	62.5362	7.2575e-08	5.64393e-06	1039	1017	1056	1035	2123	1445	1958	1542
ENSG00000176619.13	LMNB2	-0.504627	7.6862	52.7047	2.88195e-07	1.35756e-05	1996	1681	2077	1927	3814	2552	3716	3019
ENSG00000162714.13	ZNF496	-0.504697	6.79847	70.5677	2.64279e-08	2.91497e-06	1036	983	1113	1103	2010	1496	2051	1650
ENSG00000156990.14	RPUSD3	-0.504871	4.35221	33.5971	7.91815e-06	0.000157708	170	195	188	193	349	271	335	310
ENSG00000105287.13	PRKD2	-0.505231	4.9106	25.5519	4.64108e-05	0.000612433	337	258	279	267	576	367	518	482
ENSG00000105364.14	MRPL4	-0.505502	5.73185	36.4659	4.49329e-06	0.000102132	495	418	532	522	979	650	917	805
ENSG00000169964.8	TMEM42	-0.505556	4.5859	34.5945	6.4805e-06	0.000135242	224	225	203	242	401	318	436	365
ENSG00000177030.18	DEAF1	-0.505665	4.77375	30.3236	1.57069e-05	0.000265635	238	240	277	260	468	325	484	449
ENSG00000134152.11	KATNBL1	-0.505674	4.21833	27.9684	2.645e-05	0.000395394	160	184	177	187	375	249	303	277
ENSG00000164916.11	FOXK1	-0.505915	6.66892	44.2449	1.10545e-06	3.66958e-05	974	944	937	992	2055	1240	1852	1436
ENSG00000102225.16	CDK16	-0.506104	8.06343	76.7211	1.29231e-08	1.8442e-06	2569	2357	2575	2452	4822	3397	4770	3978
ENSG00000288701.1	PRRC2B	-0.506145	9.2136	74.5958	1.64587e-08	2.12925e-06	5938	5436	5757	5415	10826	7621	10923	9078
ENSG00000160050.16	CCDC28B	-0.506346	3.83981	24.4526	6.05467e-05	0.000756577	135	123	143	136	260	168	266	222
ENSG00000108262.16	GIT1	-0.506832	6.1917	40.6908	2.05159e-06	5.73719e-05	716	587	731	692	1276	880	1335	1158
ENSG00000102125.16	TAZ	-0.506923	4.92076	37.0149	4.04487e-06	9.42612e-05	323	259	291	286	533	416	526	494
ENSG00000142546.14	NOSIP	-0.507177	5.22846	39.9623	2.33922e-06	6.29048e-05	362	313	361	357	698	489	677	514
ENSG00000188322.8	SBK1	-0.507297	6.68137	24.4178	6.10651e-05	0.00076084	996	874	1036	940	1999	1047	1895	1652
ENSG00000166313.19	APBB1	-0.507687	6.16125	40.3677	2.17408e-06	5.95934e-05	711	607	723	644	1343	873	1185	1172
ENSG00000182087.14	TMEM259	-0.50788	7.36427	30.3472	1.56273e-05	0.000264741	1530	1340	1628	1575	3289	1824	3062	2263
ENSG00000197982.14	C1orf122	-0.508028	5.21049	35.6816	5.2308e-06	0.000114117	340	296	384	356	699	466	607	572
ENSG00000144589.22	STK11IP	-0.508138	5.15849	42.1423	1.58695e-06	4.68426e-05	342	327	343	340	657	446	657	548
ENSG00000115268.10	RPS15	-0.508434	9.60928	52.1197	3.14648e-07	1.42804e-05	7844	6604	7560	7576	14609	9497	14192	12305
ENSG00000076984.18	MAP2K7	-0.509003	5.45242	36.9593	4.08798e-06	9.49593e-05	419	383	422	404	858	502	764	662
ENSG00000185803.12	SLC52A2	-0.509091	4.67381	27.092	3.23232e-05	0.000462943	232	212	266	227	492	288	456	368
ENSG00000167771.6	RCOR2	-0.509151	6.76611	52.3617	3.03394e-07	1.39498e-05	1055	935	1095	1045	1927	1383	2108	1645
ENSG00000185909.15	KLHDC8B	-0.509197	5.75984	35.5456	5.3716e-06	0.000116104	514	466	537	463	1007	604	923	850
ENSG00000167535.8	CACNB3	-0.509218	4.49996	26.5134	3.69763e-05	0.000513643	247	192	231	192	412	270	418	372
ENSG00000169750.9	RAC3	-0.509223	4.74017	23.8117	7.09193e-05	0.0008568	248	200	263	239	477	295	464	389
ENSG00000237037.9	NDUFA6-DT	-0.509287	3.69232	25.9944	4.17774e-05	0.000563298	123	115	122	117	227	158	221	207
ENSG00000169727.12	GPS1	-0.509617	6.54429	54.5022	2.20996e-07	1.13935e-05	812	792	951	947	1702	1213	1693	1375
ENSG00000100243.21	CYB5R3	-0.510038	6.55054	44.7411	1.01678e-06	3.46671e-05	847	782	988	810	1718	1114	1660	1371
ENSG00000126107.15	HECTD3	-0.510167	5.30608	43.1795	1.32572e-06	4.14718e-05	387	324	386	390	730	543	668	594
ENSG00000105856.14	HBP1	-0.510612	4.5721	33.8289	7.55542e-06	0.000152313	237	234	224	225	445	372	356	387
ENSG00000178188.15	SH2B1	-0.511326	6.29339	39.7134	2.44737e-06	6.49207e-05	771	700	747	743	1500	912	1510	1165
ENSG00000213930.12	GALT	-0.511362	4.55076	32.414	1.0092e-05	0.000191077	241	197	243	211	387	317	448	370
ENSG00000043355.12	ZIC2	-0.51202	8.51585	48.5285	5.48172e-07	2.18048e-05	3283	3193	4065	3486	6769	4557	6809	5874
ENSG00000136856.18	SLC2A8	-0.512219	5.24228	33.8471	7.52778e-06	0.000152011	345	318	386	404	759	494	694	544
ENSG00000104852.15	SNRNP70	-0.512897	7.45285	51.5372	3.43643e-07	1.52464e-05	1707	1533	1627	1650	3354	2076	3145	2619
ENSG00000103363.15	ELOB	-0.513224	6.5231	56.2131	1.72659e-07	9.73574e-06	828	879	858	863	1560	1229	1590	1468
ENSG00000070047.13	PHRF1	-0.513303	6.27344	43.5419	1.24584e-06	3.9874e-05	690	699	711	775	1420	894	1427	1195
ENSG00000204463.13	BAG6	-0.514199	8.49683	68.8897	3.23917e-08	3.30649e-06	3543	3082	3400	3302	6691	4552	6210	5395
ENSG00000103066.13	PLA2G15	-0.51432	3.82962	24.1107	6.58559e-05	0.000809242	137	130	122	126	267	168	240	208
ENSG00000100842.13	EFS	-0.514521	6.63231	37.1557	3.93793e-06	9.24695e-05	1011	859	933	968	1944	1137	1838	1570
ENSG00000138834.14	MAPK8IP3	-0.514952	6.92645	33.9828	7.32462e-06	0.000148776	1212	986	1139	1167	2313	1392	2318	1745
ENSG00000105568.18	PPP2R1A	-0.515092	9.08952	68.4642	3.41277e-08	3.38647e-06	5005	4584	5516	4949	10017	6964	9051	8298
ENSG00000254585.5	MAGEL2	-0.515209	5.08682	33.9544	7.36663e-06	0.000149301	340	301	336	285	527	502	647	480
ENSG00000177732.9	SOX12	-0.515437	6.05611	41.3389	1.82795e-06	5.23339e-05	655	584	638	607	1260	773	1285	962
ENSG00000198822.11	GRM3	-0.515536	4.12656	27.4401	2.98355e-05	0.000434835	154	150	188	175	314	247	345	238
ENSG00000186648.15	CARMIL3	-0.515606	6.0879	55.1162	2.02134e-07	1.08151e-05	645	606	625	638	1186	901	1285	944
ENSG00000116786.13	PLEKHM2	-0.515681	6.32476	56.3886	1.68394e-07	9.55813e-06	740	696	859	750	1467	1030	1492	1234
ENSG00000126215.14	XRCC3	-0.515795	4.03221	26.7927	3.46449e-05	0.000487123	145	143	173	144	293	208	296	240
ENSG00000144591.20	GMPPA	-0.51583	4.18387	23.5735	7.52561e-05	0.000898045	167	153	178	185	344	223	305	298
ENSG00000140521.17	POLG	-0.515878	5.64805	45.2752	9.29951e-07	3.22628e-05	508	442	447	436	927	622	904	698
ENSG00000115073.8	ACTR1B	-0.515963	6.01153	65.5629	4.90523e-08	4.3666e-06	623	602	594	614	1168	844	1172	988
ENSG00000109956.13	B3GAT1	-0.516025	4.99114	38.3335	3.15512e-06	7.83712e-05	284	293	338	281	587	395	552	514
ENSG00000012232.9	EXTL3	-0.51627	7.18781	64.7221	5.46148e-08	4.7179e-06	1390	1341	1486	1295	2651	1817	2616	2366
ENSG00000162302.13	RPS6KA4	-0.516607	4.85642	44.1349	1.12623e-06	3.71188e-05	271	254	272	252	497	383	530	390
ENSG00000100359.21	SGSM3	-0.516825	5.94522	37.8957	3.42428e-06	8.3305e-05	594	483	627	587	1122	745	1198	882
ENSG00000167658.16	EEF2	-0.51694	12.1049	82.5055	6.86649e-09	1.34464e-06	41172	36717	43733	40410	79658	59588	76045	62598
ENSG00000124762.14	CDKN1A	-0.517087	9.28093	67.7502	3.72732e-08	3.58013e-06	6105	5872	5812	5844	12153	8644	10648	9100
ENSG00000005238.20	FAM214B	-0.517406	6.10001	69.8107	2.8955e-08	3.11914e-06	614	643	693	609	1174	942	1163	1093
ENSG00000183426.17	NPIPA1	-0.518362	6.51573	45.4516	9.03068e-07	3.16745e-05	969	869	791	840	1706	1149	1705	1412
ENSG00000143554.14	SLC27A3	-0.518683	5.47151	45.2929	9.27215e-07	3.22628e-05	393	371	466	387	799	595	750	629
ENSG00000117385.16	P3H1	-0.518833	5.75038	61.5884	8.22884e-08	6.10766e-06	548	500	506	495	1003	747	927	836
ENSG00000198931.11	APRT	-0.518834	4.94309	41.7723	1.69332e-06	4.90886e-05	242	274	309	287	512	429	563	404
ENSG00000132182.12	NUP210	-0.518854	6.92577	62.4481	7.34227e-08	5.67796e-06	1150	1035	1281	1117	2170	1627	2344	1744
ENSG00000114353.17	GNAI2	-0.519371	8.2028	57.0567	1.53182e-07	8.94693e-06	2707	2435	3094	2571	5150	3653	5057	4686
ENSG00000143850.16	PLEKHA6	-0.519408	5.9633	25.3404	4.88223e-05	0.000637267	579	483	720	545	1107	709	1169	1020
ENSG00000140545.15	MFGE8	-0.519479	6.55614	65.0722	5.22193e-08	4.5895e-06	897	812	923	819	1657	1182	1605	1479
ENSG00000117408.11	IPO13	-0.519527	5.01673	53.1502	2.69678e-07	1.31187e-05	299	294	309	294	590	424	587	456
ENSG00000115884.11	SDC1	-0.519659	6.46225	59.2012	1.13654e-07	7.28362e-06	839	741	813	855	1653	1121	1513	1302
ENSG00000104946.13	TBC1D17	-0.519764	4.59467	43.2744	1.30428e-06	4.11266e-05	235	216	228	229	458	320	426	357
ENSG00000216866.5	RPS2P55	-0.519813	5.14869	41.1028	1.90619e-06	5.41815e-05	303	287	322	315	545	534	564	454
ENSG00000105518.14	TMEM205	-0.520012	4.72323	29.8124	1.7551e-05	0.000289139	269	232	229	250	502	311	463	412
ENSG00000164535.15	DAGLB	-0.520277	5.07756	42.6104	1.46267e-06	4.41111e-05	315	272	331	301	562	450	570	508
ENSG00000138073.14	PREB	-0.520931	5.32114	43.2369	1.3127e-06	4.12732e-05	365	358	374	387	758	555	694	546
ENSG00000144647.6	POMGNT2	-0.521136	4.47304	34.5208	6.57633e-06	0.000136481	206	177	209	207	372	284	376	340
ENSG00000088256.9	GNA11	-0.521372	5.17419	30.0473	1.66757e-05	0.000277611	323	293	389	363	725	441	675	522
ENSG00000108828.16	VAT1	-0.521541	8.19597	68.82	3.26693e-08	3.30649e-06	2785	2624	2846	2674	5368	3724	4935	4755
ENSG00000160888.7	IER2	-0.521596	6.72563	40.0454	2.30426e-06	6.21769e-05	997	831	1086	1026	1945	1261	1945	1648
ENSG00000032444.17	PNPLA6	-0.521756	5.17131	38.9194	2.83049e-06	7.23564e-05	321	309	350	355	685	448	676	497
ENSG00000167526.14	RPL13	-0.521967	11.2305	93.2953	2.30848e-09	7.60837e-07	22404	20126	22672	23011	42509	32993	41679	34559
ENSG00000061273.18	HDAC7	-0.522153	6.12008	56.9926	1.54576e-07	8.99038e-06	687	614	655	659	1278	913	1236	1075
ENSG00000125746.18	EML2	-0.522263	4.20614	28.9929	2.10196e-05	0.000333291	177	168	189	162	372	239	326	263
ENSG00000116809.12	ZBTB17	-0.522589	4.76549	35.1177	5.84253e-06	0.000124232	266	252	266	239	541	361	481	381
ENSG00000110717.13	NDUFS8	-0.522826	5.60943	45.6902	8.68062e-07	3.08062e-05	454	420	459	436	917	580	823	731
ENSG00000176101.12	SSNA1	-0.522943	4.38385	23.8594	7.00839e-05	0.000849554	172	157	236	192	376	256	355	316
ENSG00000129946.11	SHC2	-0.522958	4.01125	23.1623	8.34427e-05	0.000973088	151	145	154	137	299	181	295	239
ENSG00000178605.13	GTPBP6	-0.523123	4.38606	23.2559	8.14971e-05	0.000955227	203	159	204	195	403	229	372	312
ENSG00000178605.13	PAR_Y_GTPBP6	-0.523123	4.38606	23.2559	8.14971e-05	0.000955227	203	159	204	195	403	229	372	312
ENSG00000010295.20	IFFO1	-0.523433	4.65681	33.1251	8.717e-06	0.000170551	259	255	228	219	482	310	490	379
ENSG00000099991.18	CABIN1	-0.523527	6.61397	50.9419	3.76314e-07	1.62026e-05	941	842	972	833	1735	1184	1787	1487
ENSG00000123159.16	GIPC1	-0.523602	5.20309	26.3062	3.88164e-05	0.000532787	321	334	327	363	733	388	664	546
ENSG00000131378.14	RFTN1	-0.523988	3.41104	24.9289	5.39149e-05	0.000692317	105	100	91	95	188	137	181	167
ENSG00000104880.19	ARHGEF18	-0.524001	5.82205	53.1808	2.68456e-07	1.31079e-05	537	498	569	538	1072	712	1069	849
ENSG00000007392.17	LUC7L	-0.524228	6.30474	73.1951	1.93601e-08	2.32027e-06	762	762	783	747	1516	1140	1448	1159
ENSG00000110651.12	CD81	-0.524401	7.41315	61.5357	8.28685e-08	6.13426e-06	1565	1480	1698	1513	3256	2124	2836	2576
ENSG00000100280.17	AP1B1	-0.524488	6.97282	50.337	4.13022e-07	1.72988e-05	1216	1099	1254	1143	2434	1516	2205	1986
ENSG00000166016.6	ABTB2	-0.524497	5.56154	38.2513	3.20387e-06	7.93373e-05	458	390	475	454	910	570	835	754
ENSG00000243989.9	ACY1	-0.524814	3.92466	25.8743	4.29826e-05	0.00057598	126	127	160	145	263	196	278	225
ENSG00000182841.12	RRP7BP	-0.524946	6.88182	58.3621	1.27611e-07	7.92132e-06	1203	1068	1045	1126	2082	1566	2234	1790
ENSG00000168397.17	ATG4B	-0.524998	7.18562	52.8108	2.83663e-07	1.34707e-05	1460	1286	1312	1410	2805	1767	2606	2283
ENSG00000059915.17	PSD	-0.525099	4.66784	25.1853	5.0677e-05	0.000658064	234	218	263	205	481	273	454	384
ENSG00000235173.7	HGH1	-0.525132	5.09213	31.754	1.1582e-05	0.000210974	306	283	357	308	643	426	672	433
ENSG00000124535.16	WRNIP1	-0.525548	5.25237	55.4746	1.91938e-07	1.05016e-05	333	352	376	351	674	531	707	524
ENSG00000058453.17	CROCC	-0.526354	5.70457	28.4381	2.37904e-05	0.000366113	515	471	510	454	1017	568	1051	756
ENSG00000197565.16	COL4A6	-0.526493	5.07552	31.4939	1.22341e-05	0.000219203	321	299	305	333	583	401	570	613
ENSG00000100416.15	TRMU	-0.526714	5.97983	47.7389	6.21745e-07	2.37749e-05	646	540	574	584	1167	787	1149	954
ENSG00000197380.11	DACT3	-0.526829	4.72879	30.0342	1.67232e-05	0.000278053	287	229	265	225	511	321	490	419
ENSG00000142627.13	EPHA2	-0.527235	6.41179	42.1217	1.59268e-06	4.68684e-05	843	736	824	786	1695	1040	1373	1401
ENSG00000131759.18	RARA	-0.527422	4.41474	24.4355	6.08021e-05	0.000758587	194	181	210	183	407	225	390	311
ENSG00000205903.7	ZNF316	-0.527534	6.28992	33.8083	7.5869e-06	0.000152648	746	654	800	764	1550	896	1522	1185
ENSG00000156453.14	PCDH1	-0.527626	5.99787	39.0418	2.76737e-06	7.1137e-05	605	558	672	482	1185	825	1049	939
ENSG00000204677.13	FAM153CP	-0.527684	4.68167	27.243	3.12176e-05	0.000450561	257	220	254	224	471	292	478	413
ENSG00000244560.7	RP4-800G7.2	-0.528187	3.94369	23.11	8.4551e-05	0.000983527	146	158	133	127	294	195	269	218
ENSG00000204394.13	VARS1	-0.528281	6.7442	61.1077	8.775e-08	6.27741e-06	940	928	1037	1000	2018	1327	1906	1519
ENSG00000243244.7	STON1	-0.528308	5.75047	61.7652	8.03738e-08	5.9977e-06	493	580	506	456	956	792	980	781
ENSG00000160214.13	RRP1	-0.528619	4.64181	24.6867	5.71822e-05	0.000724446	244	202	234	261	454	304	478	395
ENSG00000104529.18	EEF1D	-0.529685	8.48951	72.5261	2.09391e-08	2.46681e-06	3455	2960	3332	3500	6638	4885	6199	5210
ENSG00000179455.10	MKRN3	-0.52971	4.1665	29.5477	1.85975e-05	0.00030251	170	193	157	172	309	240	374	276
ENSG00000090447.12	TFAP4	-0.529774	4.11511	26.7009	3.53928e-05	0.000495875	145	169	144	169	319	249	311	207
ENSG00000250479.9	CHCHD10	-0.530132	4.3884	41.2742	1.84904e-06	5.2774e-05	178	199	217	190	344	315	369	322
ENSG00000162300.13	ZFPL1	-0.530222	5.59019	43.3176	1.29465e-06	4.08692e-05	458	417	463	439	966	594	802	719
ENSG00000182175.14	RGMA	-0.530593	6.80464	37.4711	3.70938e-06	8.8714e-05	951	932	1097	1105	2157	1287	2131	1547
ENSG00000159840.16	ZYX	-0.530593	6.15914	35.1409	5.81581e-06	0.000124045	735	560	706	661	1336	859	1308	1119
ENSG00000274070.2	CASTOR2	-0.530634	5.20846	31.9086	1.12126e-05	0.000205987	395	331	335	328	680	434	670	624
ENSG00000186010.19	NDUFA13	-0.531402	6.83605	66.5741	4.31666e-08	3.98356e-06	1079	936	1084	1069	2030	1543	1975	1668
ENSG00000064300.9	NGFR	-0.53161	7.78707	49.7448	4.52771e-07	1.86255e-05	1970	1812	2353	1851	3991	2780	3844	3229
ENSG00000185596.16	WASH3P	-0.531665	5.65244	39.31	2.6344e-06	6.83823e-05	496	401	488	495	911	633	968	755
ENSG00000141985.9	SH3GL1	-0.531757	6.42009	42.871	1.39814e-06	4.29128e-05	747	723	895	791	1664	1005	1508	1307
ENSG00000185324.22	CDK10	-0.532021	6.01585	40.0869	2.28706e-06	6.18332e-05	634	532	637	641	1206	783	1247	1015
ENSG00000168488.19	ATXN2L	-0.532027	8.1755	60.4741	9.55623e-08	6.5552e-06	2992	2619	2665	2680	5537	3654	5348	4508
ENSG00000104825.17	NFKBIB	-0.532229	4.79816	28.9212	2.13567e-05	0.000337065	227	252	265	282	566	337	485	396
ENSG00000063241.8	ISOC2	-0.5323	4.59381	30.7873	1.42164e-05	0.00024645	203	193	235	240	451	307	411	342
ENSG00000146555.19	SDK1	-0.53248	4.79447	23.8761	6.97926e-05	0.000847391	261	246	238	286	532	303	515	445
ENSG00000076356.7	PLXNA2	-0.532665	7.515	23.1678	8.33265e-05	0.000972143	1681	1600	1693	1966	3581	1932	3886	2768
ENSG00000153551.14	CMTM7	-0.532771	5.70357	58.5983	1.23502e-07	7.71819e-06	510	439	491	504	872	792	867	820
ENSG00000204469.13	PRRC2A	-0.534196	8.94814	69.9003	2.86426e-08	3.09754e-06	4829	4360	4834	4438	9168	6229	9212	7524
ENSG00000159692.16	CTBP1	-0.534949	6.96286	45.2785	9.29439e-07	3.22628e-05	1167	1076	1160	1209	2454	1459	2363	1787
ENSG00000097007.19	ABL1	-0.535031	7.1648	62.1137	7.6741e-08	5.83927e-06	1411	1190	1439	1325	2632	1838	2629	2231
ENSG00000065268.11	WDR18	-0.535316	4.89475	33.1543	8.66523e-06	0.000169899	243	234	312	290	565	371	526	416
ENSG00000172530.21	BANP	-0.535545	3.47937	25.3469	4.8746e-05	0.000637267	105	94	107	97	207	145	198	151
ENSG00000136848.17	DAB2IP	-0.535647	6.69354	59.1335	1.14717e-07	7.33471e-06	949	943	1019	923	1952	1237	1857	1629
ENSG00000090097.22	PCBP4	-0.535797	7.62564	49.0337	5.06115e-07	2.04851e-05	1832	1581	1988	1846	3745	2354	3465	3062
ENSG00000179271.3	GADD45GIP1	-0.535819	4.85523	39.6277	2.48585e-06	6.55435e-05	240	247	283	257	532	339	503	414
ENSG00000239779.7	WBP1	-0.536545	6.39827	56.8412	1.57919e-07	9.09026e-06	800	703	873	727	1470	1060	1525	1338
ENSG00000198837.10	DENND4B	-0.536736	6.4682	44.3175	1.09197e-06	3.65551e-05	905	815	859	807	1733	1078	1671	1425
ENSG00000160325.15	CACFD1	-0.537394	5.3142	30.3579	1.55912e-05	0.000264654	364	321	406	357	786	448	655	634
ENSG00000067840.13	PDZD4	-0.537466	6.07842	28.6808	2.25321e-05	0.000351699	677	528	676	630	1272	741	1320	1061
ENSG00000272267.2	RP11-375N15.2	-0.537611	4.08585	27.9819	2.63692e-05	0.000394611	174	149	153	159	334	226	317	231
ENSG00000130332.15	LSM7	-0.537974	5.9483	55.3343	1.95862e-07	1.0649e-05	574	523	564	561	1133	763	1104	877
ENSG00000180011.7	ZADH2	-0.538468	4.34596	26.1023	4.07258e-05	0.000552422	225	215	170	193	390	274	423	315
ENSG00000090861.17	AARS1	-0.538884	8.38815	81.8545	7.35976e-09	1.39184e-06	3297	3292	2969	3257	6148	5174	6054	4889
ENSG00000026297.17	RNASET2	-0.538969	4.063	28.8535	2.16808e-05	0.000340897	146	150	156	161	302	208	291	266
ENSG00000132563.16	REEP2	-0.539084	6.70073	59.3214	1.11795e-07	7.21478e-06	993	851	1003	920	1894	1271	1806	1597
ENSG00000138835.22	RGS3	-0.539328	5.37954	38.8745	2.85401e-06	7.27563e-05	401	359	435	337	755	491	764	662
ENSG00000105290.13	APLP1	-0.539505	7.56458	60.581	9.41934e-08	6.49517e-06	1731	1594	1802	1766	3651	2295	3247	2847
ENSG00000163931.16	TKT	-0.539802	8.6733	94.1818	2.12055e-09	7.33842e-07	3798	3437	3830	3900	7225	5564	7242	6037
ENSG00000175221.15	MED16	-0.539837	5.68521	31.2417	1.29046e-05	0.00022866	432	391	544	480	944	572	939	775
ENSG00000148300.12	REXO4	-0.539953	5.55441	64.7988	5.408e-08	4.7179e-06	447	436	445	406	828	662	793	728
ENSG00000103249.18	CLCN7	-0.540446	6.19359	37.5118	3.68091e-06	8.81541e-05	680	586	688	721	1426	829	1304	1125
ENSG00000137309.20	HMGA1	-0.540571	8.61221	80.7288	8.30639e-09	1.46473e-06	3521	3269	3958	3515	7102	5192	7090	5517
ENSG00000129657.16	SEC14L1	-0.542266	6.92722	55.4996	1.9125e-07	1.05015e-05	1185	1113	1241	1242	2337	1567	2244	2194
ENSG00000169223.15	LMAN2	-0.542302	6.3889	80.9211	8.13573e-09	1.46043e-06	788	703	785	722	1422	1139	1457	1207
ENSG00000089472.17	HEPH	-0.542508	5.17628	38.5341	3.03963e-06	7.60181e-05	364	302	355	294	625	451	600	613
ENSG00000103257.9	SLC7A5	-0.543675	6.62735	28.4834	2.35497e-05	0.000363217	961	816	1043	1007	2085	1150	2006	1500
ENSG00000128159.12	TUBGCP6	-0.544023	6.19521	36.0983	4.82369e-06	0.000107178	730	637	669	686	1456	871	1329	1121
ENSG00000090661.12	CERS4	-0.544292	5.21151	44.5605	1.04812e-06	3.53902e-05	352	289	372	336	658	498	618	578
ENSG00000112984.12	KIF20A	-0.544368	5.19514	56.385	1.6848e-07	9.55813e-06	315	366	368	342	588	580	686	564
ENSG00000105251.11	SHD	-0.544376	6.22857	43.4428	1.26715e-06	4.03368e-05	687	598	711	703	1388	905	1403	1044
ENSG00000116685.16	KIAA2013	-0.544721	6.29749	50.1609	4.24427e-07	1.76962e-05	704	664	767	713	1527	986	1351	1126
ENSG00000160948.14	VPS28	-0.545149	6.038	42.4919	1.49311e-06	4.48338e-05	634	531	607	634	1200	815	1118	1074
ENSG00000127663.15	KDM4B	-0.545353	6.75893	33.354	8.31914e-06	0.000164042	962	902	1134	981	2117	1209	1975	1690
ENSG00000104884.17	ERCC2	-0.545365	5.84716	55.8037	1.83071e-07	1.02208e-05	575	457	535	541	1055	761	1028	847
ENSG00000185236.12	RAB11B	-0.546462	6.54035	34.3233	6.84085e-06	0.00014081	838	744	997	833	1773	1043	1789	1401
ENSG00000135929.9	CYP27A1	-0.546701	5.05704	33.8659	7.49915e-06	0.000151574	362	273	300	265	576	440	573	509
ENSG00000106976.21	DNM1	-0.546953	5.85778	28.2256	2.49556e-05	0.000378433	594	543	535	521	1179	633	1064	981
ENSG00000137700.18	SLC37A4	-0.547385	5.60571	61.1924	8.67601e-08	6.2708e-06	474	466	451	458	933	678	921	711
ENSG00000100319.13	ZMAT5	-0.547835	4.08572	29.0448	2.0779e-05	0.000330612	158	163	133	159	309	212	299	255
ENSG00000161179.14	YDJC	-0.548352	4.11439	25.4977	4.70164e-05	0.000619243	144	144	177	145	332	197	318	227
ENSG00000100227.18	POLDIP3	-0.548372	7.97456	114.446	3.5734e-10	3.13933e-07	2366	2235	2423	2247	4500	3627	4309	3765
ENSG00000124155.18	PIGT	-0.548578	6.92165	83.4988	6.182e-09	1.26777e-06	1170	1011	1187	1098	2199	1693	2068	1852
ENSG00000113504.21	SLC12A7	-0.548962	5.95256	40.3751	2.17119e-06	5.95934e-05	633	485	596	615	1231	772	1158	940
ENSG00000099800.8	TIMM13	-0.549006	5.4105	32.7001	9.5122e-06	0.00018258	389	318	427	380	758	466	775	664
ENSG00000130175.10	PRKCSH	-0.549156	8.61422	73.6979	1.82589e-08	2.24666e-06	3691	3199	3820	3538	6993	4939	6819	6233
ENSG00000143578.16	CREB3L4	-0.549234	4.7121	35.5479	5.36918e-06	0.000116104	249	233	230	244	421	424	440	381
ENSG00000165716.11	DIPK1B	-0.549355	5.69888	53.1397	2.70099e-07	1.31187e-05	456	442	529	476	984	638	927	794
ENSG00000160789.24	LMNA	-0.549484	5.67851	60.7825	9.16697e-08	6.39263e-06	479	462	467	477	951	658	954	751
ENSG00000077454.16	LRCH4	-0.549907	5.74313	24.5533	5.9074e-05	0.000743731	523	426	545	430	1082	552	1000	768
ENSG00000135631.17	RAB11FIP5	-0.550604	4.883	36.5759	4.39923e-06	0.000100905	290	249	278	266	585	364	512	444
ENSG00000105245.9	NUMBL	-0.550672	4.67444	32.8624	9.19959e-06	0.000177981	240	230	234	237	496	283	480	400
ENSG00000168758.11	SEMA4C	-0.551026	6.22253	43.2193	1.31667e-06	4.12821e-05	773	598	691	713	1407	896	1418	1172
ENSG00000196092.14	PAX5	-0.551097	5.75113	28.2365	2.48943e-05	0.000378265	535	479	492	622	1013	667	1125	946
ENSG00000166619.15	BLCAP	-0.551121	6.84393	69.2696	3.0923e-08	3.27461e-06	1051	1071	1054	1068	2138	1448	1973	1890
ENSG00000204520.14	MICA	-0.551122	3.90137	23.7182	7.25876e-05	0.000870242	162	148	108	124	262	193	269	228
ENSG00000134574.12	DDB2	-0.551239	5.79672	53.8829	2.4199e-07	1.21352e-05	572	527	479	471	995	831	948	813
ENSG00000186866.17	POFUT2	-0.551766	6.3225	72.1458	2.18991e-08	2.55812e-06	793	714	700	801	1511	1129	1404	1237
ENSG00000080845.19	DLGAP4	-0.552031	7.02297	75.6778	1.45424e-08	1.98328e-06	1273	1160	1219	1157	2413	1655	2339	2052
ENSG00000172354.10	GNB2	-0.552719	7.1005	43.8881	1.17442e-06	3.83417e-05	1214	1050	1397	1313	2685	1652	2436	2007
ENSG00000184194.6	GPR173	-0.552823	5.61879	26.8367	3.42926e-05	0.000484136	555	489	403	422	955	553	974	821
ENSG00000007080.11	CCDC124	-0.552992	5.52247	52.9338	2.78507e-07	1.33862e-05	451	372	399	439	808	608	824	682
ENSG00000119333.12	DYNC2I2	-0.553266	4.93942	27.8849	2.69557e-05	0.000402301	239	241	344	286	566	351	544	493
ENSG00000123933.17	MXD4	-0.553338	5.02274	32.9835	8.97362e-06	0.00017434	310	302	287	286	659	360	575	499
ENSG00000134882.16	UBAC2	-0.553494	5.30081	65.6341	4.861e-08	4.34119e-06	356	380	348	360	687	541	707	601
ENSG00000213145.10	CRIP1	-0.553917	4.29067	28.0038	2.62385e-05	0.000393081	169	170	201	166	314	245	371	311
ENSG00000135451.13	TROAP	-0.553981	4.5336	30.1382	1.63502e-05	0.000274005	213	217	221	223	406	273	505	361
ENSG00000110492.16	MDK	-0.554573	9.89652	74.6366	1.63817e-08	2.12923e-06	9003	8053	9651	8243	16941	12566	17355	14661
ENSG00000108784.10	NAGLU	-0.554708	3.70754	23.3298	7.99966e-05	0.000941626	108	95	133	130	228	158	226	208
ENSG00000179335.20	CLK3	-0.556022	6.74647	71.4533	2.37726e-08	2.7196e-06	1105	970	1060	1030	2148	1449	1973	1775
ENSG00000177700.6	POLR2L	-0.55611	5.29691	36.1061	4.81642e-06	0.000107167	392	321	336	380	685	454	737	648
ENSG00000196961.13	AP2A1	-0.556324	6.77461	54.3601	2.25631e-07	1.15677e-05	985	890	1114	1054	2196	1407	1877	1657
ENSG00000148337.21	CIZ1	-0.556404	7.26783	85.2687	5.1397e-09	1.17784e-06	1489	1319	1561	1323	2804	2100	2739	2378
ENSG00000137103.20	TMEM8B	-0.55658	7.29054	69.0912	3.16036e-08	3.30649e-06	1573	1375	1379	1422	2826	2001	2759	2548
ENSG00000132478.10	UNK	-0.556666	5.76798	35.3684	5.56145e-06	0.000119547	516	453	542	522	1084	613	1003	898
ENSG00000183580.10	FBXL7	-0.556791	3.63462	28.0914	2.57231e-05	0.000387035	109	119	116	102	208	150	239	190
ENSG00000103199.14	ZNF500	-0.556938	3.85344	29.2578	1.98225e-05	0.000317828	150	114	133	127	268	183	258	216
ENSG00000177731.16	FLII	-0.557097	6.74504	79.1646	9.84946e-09	1.60401e-06	1013	958	1030	947	1940	1416	1896	1703
ENSG00000100802.15	C14orf93	-0.5574	4.89343	41.8001	1.68508e-06	4.89521e-05	286	263	281	251	497	484	506	409
ENSG00000213420.8	GPC2	-0.557531	6.76414	51.5544	3.42747e-07	1.5231e-05	1007	917	1057	954	2109	1295	1969	1597
ENSG00000139880.20	CDH24	-0.557585	4.62969	23.9131	6.91564e-05	0.000841725	212	195	262	200	482	256	432	369
ENSG00000105325.15	FZR1	-0.557783	5.46251	31.4267	1.24088e-05	0.000221781	401	333	426	430	876	484	803	658
ENSG00000140332.17	TLE3	-0.557914	6.37428	53.3911	2.60212e-07	1.27509e-05	791	675	866	725	1576	1042	1514	1272
ENSG00000225697.13	SLC26A6	-0.559513	4.90533	27.6195	2.86351e-05	0.000421798	330	277	282	214	555	383	570	444
ENSG00000064961.19	HMG20B	-0.559549	4.6769	32.7892	9.33912e-06	0.000179801	242	217	237	218	482	275	461	402
ENSG00000116670.15	MAD2L2	-0.559576	6.87668	80.8747	8.17652e-09	1.46043e-06	1006	973	1186	1042	1960	1571	2050	1829
ENSG00000175309.15	PHYKPL	-0.559667	4.58821	40.6673	2.06024e-06	5.75556e-05	252	239	211	211	417	334	466	394
ENSG00000141736.14	ERBB2	-0.559921	6.78582	89.1688	3.45827e-09	9.57421e-07	1043	948	1092	949	1949	1514	1961	1688
ENSG00000023191.17	RNH1	-0.559991	6.58059	59.0389	1.16218e-07	7.40942e-06	903	806	944	880	1890	1257	1708	1401
ENSG00000115275.14	MOGS	-0.560755	6.1585	62.9686	6.8565e-08	5.498e-06	683	647	695	632	1385	898	1311	1113
ENSG00000184640.20	SEPTIN9	-0.561776	8.24304	77.0633	1.24357e-08	1.83129e-06	2759	2458	3037	2725	5503	3878	5458	4606
ENSG00000118960.13	HS1BP3	-0.56183	4.71237	52.455	2.99175e-07	1.3848e-05	228	213	241	239	472	335	450	373
ENSG00000174917.9	MICOS13	-0.561888	4.01775	26.339	3.85183e-05	0.000529746	135	151	132	158	290	192	304	236
ENSG00000164086.10	DUSP7	-0.562124	4.52543	26.2845	3.90146e-05	0.000535026	224	180	246	193	489	299	399	309
ENSG00000106628.12	POLD2	-0.562303	6.60136	72.5362	2.09143e-08	2.46681e-06	895	841	932	833	1736	1223	1711	1525
ENSG00000179364.14	PACS2	-0.562397	6.32463	48.5352	5.47588e-07	2.18048e-05	756	683	812	694	1499	940	1501	1287
ENSG00000167792.13	NDUFV1	-0.563129	7.18687	80.5792	8.44192e-09	1.47921e-06	1318	1224	1401	1403	2739	1936	2608	2193
ENSG00000129933.21	MAU2	-0.564002	6.11297	70.6314	2.62265e-08	2.91497e-06	655	591	694	601	1264	917	1257	1064
ENSG00000133466.14	C1QTNF6	-0.564224	5.37045	57.3201	1.47604e-07	8.71307e-06	399	357	369	375	728	522	744	664
ENSG00000188807.13	TMEM201	-0.564255	4.82714	23.5183	7.63024e-05	0.000907402	276	190	294	265	530	310	517	465
ENSG00000189319.14	FAM53B	-0.564513	5.53688	44.3346	1.08882e-06	3.64939e-05	411	404	478	380	907	562	845	661
ENSG00000136717.15	BIN1	-0.564523	5.9617	47.2786	6.69573e-07	2.51521e-05	575	468	634	586	1208	808	1093	909
ENSG00000186193.9	SAPCD2	-0.564733	5.60681	35.1514	5.80387e-06	0.000123982	409	422	478	439	915	516	955	732
ENSG00000088899.16	LZTS3	-0.564999	4.93162	34.8447	6.16642e-06	0.000129823	318	255	256	316	638	410	542	446
ENSG00000091947.10	TMEM101	-0.565007	5.76933	55.2455	1.98388e-07	1.07273e-05	498	440	516	515	996	686	943	866
ENSG00000185359.14	HGS	-0.565026	6.95621	59.4046	1.10528e-07	7.16623e-06	1191	1089	1148	1132	2489	1546	2201	1876
ENSG00000132361.18	CLUH	-0.565158	5.87342	30.3721	1.55433e-05	0.000264159	628	466	552	562	1234	697	1169	847
ENSG00000180891.13	CUEDC1	-0.566037	5.70686	37.4088	3.75331e-06	8.93546e-05	439	405	574	499	997	643	911	851
ENSG00000054148.18	PHPT1	-0.566073	7.05429	85.3512	5.09601e-09	1.17784e-06	1173	1203	1213	1258	2528	1728	2326	2026
ENSG00000233225.3	SSBL3P1	-0.566223	3.69738	25.8087	4.36578e-05	0.000582209	120	97	126	123	218	162	222	223
ENSG00000169184.6	MN1	-0.566239	7.53914	43.2086	1.31909e-06	4.13112e-05	1705	1620	1880	1614	3770	2146	3484	2775
ENSG00000171703.17	TCEA2	-0.566277	5.19372	52.352	3.03838e-07	1.39498e-05	336	322	356	350	696	466	716	550
ENSG00000148334.16	PTGES2	-0.566568	4.66822	27.3327	3.05797e-05	0.00044371	225	216	236	223	502	258	432	411
ENSG00000125656.11	CLPP	-0.56671	5.53742	34.5362	6.55625e-06	0.000136269	416	341	481	439	914	571	809	690
ENSG00000167775.11	CD320	-0.566835	4.55841	31.6598	1.18137e-05	0.000213765	200	198	233	221	480	288	413	336
ENSG00000099949.21	LZTR1	-0.567295	5.58213	44.56	1.04822e-06	3.53902e-05	423	393	447	484	926	583	912	696
ENSG00000182272.12	B4GALNT4	-0.567508	5.82728	26.7113	3.53071e-05	0.000495417	506	445	518	593	1118	586	1069	914
ENSG00000108469.15	RECQL5	-0.56791	5.32193	58.6016	1.23445e-07	7.71819e-06	411	365	347	366	712	528	765	642
ENSG00000065485.20	PDIA5	-0.568024	4.96967	57.2398	1.49282e-07	8.77465e-06	262	310	292	314	565	464	542	513
ENSG00000170667.15	RASA4B	-0.568091	5.038	34.3372	6.82184e-06	0.000140627	357	274	280	319	633	430	594	531
ENSG00000282458.1	WASH5P	-0.568291	6.24855	62.2565	7.53041e-08	5.79109e-06	810	693	684	721	1429	1008	1432	1301
ENSG00000148343.19	MIGA2	-0.569115	4.62381	45.3911	9.12194e-07	3.18865e-05	223	237	253	224	459	328	450	426
ENSG00000184897.6	H1-10	-0.569599	7.42109	49.5898	4.63855e-07	1.89968e-05	1510	1404	1644	1508	3226	1923	3312	2409
ENSG00000126461.15	SCAF1	-0.569959	6.42765	36.9586	4.08855e-06	9.49593e-05	775	706	846	816	1727	963	1685	1260
ENSG00000167962.14	ZNF598	-0.569961	5.57221	25.3842	4.8312e-05	0.000632995	458	374	465	456	1051	518	878	697
ENSG00000148384.14	INPP5E	-0.57003	5.4008	47.4195	6.5452e-07	2.47209e-05	432	353	386	387	816	538	788	638
ENSG00000142784.16	WDTC1	-0.570124	6.30615	57.8393	1.37244e-07	8.29606e-06	723	704	820	691	1539	992	1419	1282
ENSG00000171161.13	ZNF672	-0.57043	5.29959	55.0607	2.03763e-07	1.08151e-05	372	370	360	350	785	514	683	604
ENSG00000179532.13	DNHD1	-0.570717	4.86288	35.2305	5.71417e-06	0.000122443	296	278	239	285	580	358	519	500
ENSG00000130821.17	SLC6A8	-0.570884	9.30223	84.7251	5.4378e-09	1.20328e-06	5910	5440	6374	5502	11661	8202	11713	9825
ENSG00000162910.19	MRPL55	-0.570929	4.82536	40.264	2.21505e-06	6.04771e-05	262	255	246	279	577	358	467	454
ENSG00000185386.15	MAPK11	-0.571075	4.74116	38.2227	3.22098e-06	7.96185e-05	274	224	236	238	481	324	503	426
ENSG00000002016.18	RAD52	-0.57111	5.21031	53.8788	2.42134e-07	1.21352e-05	378	341	332	391	695	509	732	633
ENSG00000122678.17	POLM	-0.571344	4.4753	30.0745	1.65777e-05	0.000276146	211	175	240	192	422	263	402	371
ENSG00000134247.10	PTGFRN	-0.571899	5.66306	54.8322	2.1063e-07	1.10879e-05	496	444	469	512	994	671	940	822
ENSG00000090372.15	STRN4	-0.571998	7.27683	54.0712	2.35385e-07	1.19134e-05	1497	1233	1543	1415	3053	1959	2900	2267
ENSG00000167925.16	GHDC	-0.572035	4.09146	27.4391	2.98424e-05	0.000434835	154	130	148	171	287	257	298	230
ENSG00000112406.5	HECA	-0.572041	4.04392	25.722	4.45664e-05	0.000592329	142	166	147	152	354	202	271	256
ENSG00000117318.9	ID3	-0.572092	6.63093	31.8859	1.12662e-05	0.000206695	803	740	1115	790	1701	1149	1700	1588
ENSG00000073605.19	GSDMB	-0.572375	4.47184	26.9684	3.32607e-05	0.000472459	261	209	179	186	401	286	426	376
ENSG00000243302.3	RP11-274B21.2	-0.572464	4.34443	27.2824	3.09359e-05	0.000447471	216	190	159	200	387	248	383	348
ENSG00000168159.14	RNF187	-0.572717	6.65593	58.2823	1.29032e-07	7.99164e-06	915	863	989	952	1973	1231	1790	1647
ENSG00000198089.16	SFI1	-0.572725	4.49183	40.7779	2.01985e-06	5.65416e-05	219	198	200	202	391	283	428	359
ENSG00000225663.8	MCRIP1	-0.57292	5.85611	34.5068	6.59473e-06	0.000136658	483	417	599	562	1056	729	1025	868
ENSG00000169783.13	LINGO1	-0.57295	5.99436	48.3899	5.60368e-07	2.20994e-05	558	522	682	540	1229	775	1123	983
ENSG00000103227.19	LMF1	-0.572951	3.58959	24.6334	5.79302e-05	0.000731993	100	97	133	103	230	162	212	168
ENSG00000005007.13	UPF1	-0.573572	6.79653	67.9345	3.64321e-08	3.53903e-06	1024	931	1129	1008	2159	1432	2085	1645
ENSG00000196557.13	CACNA1H	-0.574846	5.33048	33.5823	7.94202e-06	0.00015807	389	338	374	337	803	440	736	602
ENSG00000127948.16	POR	-0.575131	6.43506	64.1992	5.84191e-08	4.93089e-06	758	713	814	795	1702	1105	1479	1226
ENSG00000100439.10	ABHD4	-0.575178	4.84195	51.9491	3.22854e-07	1.45101e-05	228	277	288	248	540	376	510	432
ENSG00000233276.8	GPX1	-0.575244	6.99625	91.3079	2.79937e-09	8.51653e-07	1180	1065	1145	1178	2389	1742	2191	1837
ENSG00000148926.10	ADM	-0.575749	5.58599	48.4769	5.52677e-07	2.1921e-05	433	445	472	426	754	762	881	755
ENSG00000188486.3	H2AX	-0.576348	6.95496	42.4453	1.50526e-06	4.5052e-05	1103	981	1223	1145	2458	1420	2415	1727
ENSG00000171206.15	TRIM8	-0.576437	7.00851	93.6005	2.24182e-09	7.47769e-07	1197	1165	1290	1036	2337	1831	2299	1896
ENSG00000107731.12	UNC5B	-0.576725	5.92138	63.9323	6.04721e-08	5.07444e-06	544	544	582	520	1116	740	1093	969
ENSG00000106665.16	CLIP2	-0.576898	6.50403	57.9937	1.34318e-07	8.18539e-06	813	752	952	803	1732	1140	1675	1400
ENSG00000141295.14	SCRN2	-0.5769	4.98595	46.5671	7.51567e-07	2.75591e-05	278	266	300	294	582	375	570	510
ENSG00000233762.3	RPS15P4	-0.576911	5.87389	61.4364	8.39743e-08	6.16665e-06	565	512	577	531	1124	754	1049	979
ENSG00000102977.17	ACD	-0.577215	4.97603	30.3563	1.55964e-05	0.000264654	277	277	338	262	637	344	616	478
ENSG00000099899.15	TRMT2A	-0.577499	5.18609	40.5427	2.10677e-06	5.83844e-05	332	325	307	370	717	446	655	574
ENSG00000075275.18	CELSR1	-0.578079	5.51673	48.1262	5.84391e-07	2.27551e-05	427	428	458	401	918	544	874	741
ENSG00000107140.16	TESK1	-0.578473	4.88831	39.6383	2.48104e-06	6.54792e-05	248	260	272	298	596	354	538	448
ENSG00000223802.9	CERS1	-0.578546	4.53591	38.1616	3.25791e-06	8.04597e-05	209	194	230	208	434	282	423	368
ENSG00000167323.12	STIM1	-0.578703	4.7252	43.9357	1.16494e-06	3.81674e-05	227	276	246	198	463	349	464	415
ENSG00000101220.18	C20orf27	-0.578725	4.54586	27.6056	2.87263e-05	0.000422801	195	173	244	214	437	264	437	346
ENSG00000105438.9	KDELR1	-0.579417	7.97301	106.93	6.69058e-10	4.04355e-07	2411	2242	2457	2170	4685	3501	4475	3936
ENSG00000185000.12	DGAT1	-0.579576	4.11931	37.0454	4.02141e-06	9.38726e-05	145	156	175	164	348	221	315	264
ENSG00000132635.17	PCED1A	-0.579722	5.5583	40.0984	2.2823e-06	6.18158e-05	415	426	472	409	916	548	930	706
ENSG00000183856.11	IQGAP3	-0.579852	4.87865	37.2284	3.88388e-06	9.15887e-05	244	270	297	277	547	374	554	475
ENSG00000167615.17	LENG8	-0.580199	9.29129	40.3737	2.17174e-06	5.95934e-05	6588	5374	5466	5795	12368	7357	12239	9940
ENSG00000070413.20	DGCR2	-0.580521	6.27709	56.4149	1.67765e-07	9.55813e-06	721	663	766	696	1564	940	1447	1172
ENSG00000123064.13	DDX54	-0.580683	6.40484	63.5053	6.39219e-08	5.22029e-06	770	693	837	795	1684	1098	1513	1265
ENSG00000180448.11	ARHGAP45	-0.581015	6.65951	43.1664	1.32872e-06	4.14718e-05	937	763	966	983	1993	1276	1912	1398
ENSG00000260238.6	PMF1-BGLAP	-0.581045	3.67012	23.7707	7.16462e-05	0.000862028	119	91	126	119	217	192	219	185
ENSG00000178999.13	AURKB	-0.581104	5.03441	56.8405	1.57934e-07	9.09026e-06	304	258	312	296	560	428	577	529
ENSG00000135916.16	ITM2C	-0.581209	8.10436	75.6184	1.46411e-08	1.98695e-06	2433	2452	2779	2497	5026	3746	4647	4726
ENSG00000205959.4	RP11-689P11.2	-0.581264	3.20752	23.2914	8.07725e-05	0.000949146	98	83	73	91	168	140	162	147
ENSG00000172270.22	BSG	-0.58135	9.38032	89.0308	3.50627e-09	9.611e-07	5917	5444	6393	5982	12717	8784	11512	9611
ENSG00000104866.11	PPP1R37	-0.581367	5.51326	33.571	7.96022e-06	0.000158116	441	335	468	414	923	529	830	704
ENSG00000204371.11	EHMT2	-0.581769	7.13711	68.9317	3.22258e-08	3.30649e-06	1302	1199	1357	1266	2644	1776	2725	2083
ENSG00000279605.1	RP11-661A12.8	-0.582054	4.79957	40.0938	2.28418e-06	6.18158e-05	254	221	256	247	540	328	487	405
ENSG00000196338.14	NLGN3	-0.582171	4.7577	34.7409	6.29459e-06	0.000132019	252	222	254	244	493	304	503	448
ENSG00000125458.7	NT5C	-0.582409	4.99803	50.0742	4.3017e-07	1.7855e-05	308	246	298	272	563	443	556	453
ENSG00000181234.10	TMEM132C	-0.582517	5.20935	44.7016	1.02355e-06	3.48548e-05	336	273	392	336	648	496	659	592
ENSG00000177045.10	SIX5	-0.583082	4.52766	36.8626	4.16415e-06	9.63111e-05	215	193	221	170	447	284	399	308
ENSG00000106348.18	IMPDH1	-0.58318	6.46427	91.9043	2.64106e-09	8.21547e-07	782	760	802	809	1575	1204	1585	1296
ENSG00000073050.12	XRCC1	-0.583456	6.34968	56.6199	1.62949e-07	9.34002e-06	810	622	776	737	1475	1031	1513	1279
ENSG00000130940.15	CASZ1	-0.583768	5.26686	44.809	1.00527e-06	3.43824e-05	310	307	411	331	705	476	680	581
ENSG00000160445.11	ZER1	-0.583801	5.43785	68.6677	3.32851e-08	3.3267e-06	407	380	453	382	834	605	798	675
ENSG00000100226.16	GTPBP1	-0.58423	6.5363	81.0115	8.05675e-09	1.45785e-06	898	818	859	829	1730	1199	1682	1508
ENSG00000130159.14	ECSIT	-0.584631	4.24417	33.9628	7.35415e-06	0.000149157	177	140	174	162	346	231	314	283
ENSG00000161513.12	FDXR	-0.584778	6.09284	50.9784	3.74216e-07	1.61373e-05	654	550	598	627	1396	898	1097	981
ENSG00000134030.14	CTIF	-0.584808	5.75508	44.1629	1.12089e-06	3.69868e-05	500	476	513	462	1005	610	1043	863
ENSG00000100403.12	ZC3H7B	-0.585009	6.86238	67.9863	3.61995e-08	3.53903e-06	1159	1006	1047	1059	2102	1480	2293	1827
ENSG00000105722.10	ERF	-0.5858	5.70192	38.6641	2.96722e-06	7.47474e-05	474	445	533	483	1107	623	967	800
ENSG00000177728.17	TMEM94	-0.58621	7.48632	71.3645	2.40253e-08	2.72598e-06	1689	1513	1708	1599	3320	2221	3458	2756
ENSG00000160766.14	GBAP1	-0.586868	4.37235	32.7518	9.4113e-06	0.000181065	173	172	220	194	333	261	396	373
ENSG00000114841.18	DNAH1	-0.587669	3.77782	31.1889	1.30499e-05	0.000230854	125	112	125	128	209	188	267	217
ENSG00000007047.15	MARK4	-0.587766	6.39393	67.7154	3.74342e-08	3.58013e-06	813	712	820	722	1581	1091	1602	1264
ENSG00000225968.7	ELFN1	-0.587926	7.24251	56.6888	1.61365e-07	9.26844e-06	1324	1188	1479	1375	2954	1869	2831	2067
ENSG00000117069.15	ST6GALNAC5	-0.587941	4.15516	44.2862	1.09776e-06	3.66049e-05	150	172	175	167	314	263	317	297
ENSG00000059122.17	FLYWCH1	-0.588014	5.42556	31.099	1.33016e-05	0.00023411	347	368	455	391	910	486	807	626
ENSG00000121716.20	PILRB	-0.588359	4.60871	53.1482	2.6976e-07	1.31187e-05	235	241	208	222	459	334	459	381
ENSG00000099817.12	POLR2E	-0.588414	6.84331	54.7471	2.13254e-07	1.11445e-05	1007	880	1165	1061	2197	1407	2087	1743
ENSG00000071967.12	CYBRD1	-0.58856	3.90564	37.6968	3.55472e-06	8.58748e-05	152	151	137	139	302	232	258	248
ENSG00000130522.6	JUND	-0.58892	6.79654	28.0742	2.58238e-05	0.000387918	913	893	1153	1097	2353	1203	2214	1613
ENSG00000126464.14	PRR12	-0.589003	5.31667	28.6402	2.27372e-05	0.000354038	362	304	389	352	793	415	795	556
ENSG00000137161.17	CNPY3	-0.589527	5.6441	73.4877	1.87107e-08	2.27711e-06	432	403	466	488	867	683	915	759
ENSG00000103148.17	NPRL3	-0.589545	4.39089	42.0906	1.60136e-06	4.70182e-05	172	166	205	181	353	256	363	332
ENSG00000006025.12	OSBPL7	-0.589729	5.06654	46.4626	7.64509e-07	2.79596e-05	344	282	321	307	656	432	635	543
ENSG00000148356.15	LRSAM1	-0.589992	4.53407	36.5777	4.3977e-06	0.000100905	200	204	214	221	448	304	380	379
ENSG00000128309.17	MPST	-0.590306	5.53752	48.0142	5.94939e-07	2.3031e-05	395	381	405	454	897	556	829	679
ENSG00000099203.7	TMED1	-0.590356	4.3659	36.1494	4.77629e-06	0.000106638	153	187	210	177	375	249	368	320
ENSG00000100258.18	LMF2	-0.590383	5.57291	40.2964	2.20216e-06	6.02438e-05	424	389	455	447	1003	558	863	688
ENSG00000123143.13	PKN1	-0.590905	6.71158	57.4472	1.4499e-07	8.61386e-06	971	790	1063	916	1990	1322	1914	1544
ENSG00000160741.17	CRTC2	-0.591367	4.85011	33.1934	8.59623e-06	0.000168905	311	249	234	297	562	356	571	488
ENSG00000172893.17	DHCR7	-0.591578	5.81169	62.8266	6.98547e-08	5.52551e-06	543	483	501	494	1078	712	1065	809
ENSG00000232098.3	CTD-2619J13.14	-0.591814	3.84105	26.2375	3.94487e-05	0.000538264	131	147	143	106	273	191	279	210
ENSG00000160113.6	NR2F6	-0.59322	5.38482	24.867	5.47307e-05	0.000700517	388	299	431	412	850	440	834	663
ENSG00000105640.13	RPL18A	-0.593685	10.4144	78.947	1.00879e-08	1.61649e-06	12751	11016	12808	12789	26346	17293	24699	21208
ENSG00000141577.14	CEP131	-0.594455	4.50313	24.8012	5.56118e-05	0.000709172	204	169	219	221	433	239	470	340
ENSG00000275023.5	MLLT6	-0.595171	6.89258	48.4114	5.58458e-07	2.2087e-05	1171	981	1064	1123	2208	1380	2322	1981
ENSG00000178209.16	PLEC	-0.595319	6.43693	25.114	5.15561e-05	0.000666977	862	693	868	728	1795	865	1690	1404
ENSG00000125912.11	NCLN	-0.596027	5.4239	41.4526	1.79152e-06	5.15323e-05	399	344	413	370	818	504	796	656
ENSG00000132003.9	ZSWIM4	-0.596057	4.28614	29.2365	1.99161e-05	0.000318899	180	155	186	178	402	219	345	305
ENSG00000259768.6	RP5-991G20.1	-0.596323	3.36797	25.4796	4.72201e-05	0.000621335	87	89	99	99	164	170	187	153
ENSG00000100982.12	PCIF1	-0.596658	5.58494	64.7096	5.47028e-08	4.7179e-06	470	393	453	431	908	635	879	747
ENSG00000188986.9	NELFB	-0.596807	6.38289	55.6921	1.86026e-07	1.03209e-05	713	679	846	765	1644	1018	1514	1283
ENSG00000130164.14	LDLR	-0.597957	6.52374	108.494	5.85464e-10	3.88017e-07	901	884	839	831	1752	1377	1732	1401
ENSG00000135525.19	MAP7	-0.598045	4.48142	28.1008	2.56688e-05	0.000386638	203	213	187	214	412	271	414	386
ENSG00000274512.6	TBC1D3L	-0.598108	4.28533	31.396	1.24896e-05	0.000222937	212	192	170	156	397	258	369	303
ENSG00000072310.18	SREBF1	-0.598469	5.21482	51.5595	3.42477e-07	1.5231e-05	375	302	334	329	706	473	714	547
ENSG00000205356.10	TECPR1	-0.59884	5.0344	35.047	5.92452e-06	0.000125206	258	317	297	301	654	358	624	504
ENSG00000100324.14	TAB1	-0.599097	5.43585	53.651	2.50401e-07	1.23773e-05	397	386	394	404	823	560	880	620
ENSG00000110711.11	AIP	-0.599109	5.69369	83.201	6.37907e-09	1.29856e-06	465	428	505	466	934	743	895	802
ENSG00000011332.21	DPF1	-0.599232	6.2151	53.9607	2.39236e-07	1.20835e-05	690	597	746	679	1441	917	1390	1189
ENSG00000114779.20	ABHD14B	-0.59934	3.64046	26.7928	3.46441e-05	0.000487123	128	108	102	102	196	162	227	212
ENSG00000111678.11	C12orf57	-0.599383	6.47134	61.2687	8.58785e-08	6.22394e-06	825	649	851	829	1639	1193	1536	1357
ENSG00000166165.13	CKB	-0.599714	9.39117	60.2309	9.87606e-08	6.68599e-06	6002	5483	6438	5973	13033	7838	12818	9992
ENSG00000114315.4	HES1	-0.600032	4.87976	45.6833	8.6905e-07	3.08062e-05	317	276	240	283	552	392	585	501
ENSG00000114554.12	PLXNA1	-0.600986	7.22723	37.7125	3.54425e-06	8.57715e-05	1442	1215	1359	1521	2985	1702	2990	2460
ENSG00000163870.16	TPRA1	-0.601806	4.75408	51.9513	3.22747e-07	1.45101e-05	257	215	257	244	522	374	469	404
ENSG00000272333.7	KMT2B	-0.60192	5.93717	39.8531	2.386e-06	6.3638e-05	609	515	577	623	1313	730	1229	984
ENSG00000175567.11	UCP2	-0.601956	4.39359	51.1346	3.65383e-07	1.58304e-05	173	187	188	186	383	264	375	314
ENSG00000134222.16	PSRC1	-0.601972	4.82784	45.9032	8.38055e-07	2.99375e-05	294	215	274	259	499	396	542	457
ENSG00000248098.12	BCKDHA	-0.602052	5.04667	52.4825	2.97945e-07	1.38399e-05	290	289	330	267	650	414	591	488
ENSG00000125995.16	ROMO1	-0.602184	5.2667	27.2216	3.13714e-05	0.000451647	319	303	359	367	749	402	706	608
ENSG00000185252.19	ZNF74	-0.602199	5.40171	68.9069	3.23234e-08	3.30649e-06	413	365	369	377	804	561	745	663
ENSG00000123453.18	SARDH	-0.602603	3.90056	28.3656	2.41814e-05	0.00036946	128	116	153	121	270	172	280	223
ENSG00000103197.18	TSC2	-0.602879	6.89514	53.0412	2.74088e-07	1.32428e-05	1144	944	1156	1072	2310	1448	2273	1859
ENSG00000135723.14	FHOD1	-0.603419	3.20424	24.0942	6.61252e-05	0.00081183	80	79	78	89	161	116	162	154
ENSG00000163517.15	HDAC11	-0.603855	3.87727	29.4278	1.90937e-05	0.000309129	161	112	140	128	295	196	261	234
ENSG00000006282.21	SPATA20	-0.603859	5.29913	67.4287	3.87918e-08	3.67001e-06	351	309	374	375	690	534	713	626
ENSG00000110628.16	SLC22A18	-0.604515	3.14008	23.5037	7.65824e-05	0.000909169	77	69	81	82	167	110	147	139
ENSG00000102858.13	MGRN1	-0.604675	6.52809	47.8509	6.10683e-07	2.34703e-05	851	759	901	797	1888	1061	1699	1413
ENSG00000170271.11	FAXDC2	-0.60525	4.66617	43.1548	1.33136e-06	4.15077e-05	242	237	203	221	447	339	415	439
ENSG00000103126.15	AXIN1	-0.605307	5.40463	41.2354	1.86181e-06	5.3029e-05	367	328	418	424	837	501	808	668
ENSG00000168209.6	DDIT4	-0.605512	7.57309	39.4045	2.58921e-06	6.74742e-05	1710	1660	2266	1793	3885	3015	3576	3034
ENSG00000148341.18	SH3GLB2	-0.6058	5.2988	51.9655	3.22051e-07	1.45101e-05	342	346	377	354	748	469	723	652
ENSG00000160570.14	DEDD2	-0.606245	4.18323	35.6978	5.21426e-06	0.000114082	192	146	167	156	371	253	300	281
ENSG00000099624.8	ATP5F1D	-0.606457	4.95194	32.6041	9.7025e-06	0.000185123	287	217	300	263	588	351	598	422
ENSG00000143126.8	CELSR2	-0.607064	8.10941	51.649	3.37859e-07	1.50743e-05	2540	2443	2539	2499	5478	3110	5474	4365
ENSG00000160298.18	C21orf58	-0.607284	3.87663	24.8293	5.52332e-05	0.00070597	117	110	138	145	257	161	292	225
ENSG00000126934.14	MAP2K2	-0.607502	6.99232	71.4174	2.38743e-08	2.72001e-06	1144	980	1271	1078	2432	1671	2223	1851
ENSG00000127580.17	WDR24	-0.607862	4.48462	28.2497	2.48204e-05	0.000377349	194	196	214	198	469	238	455	315
ENSG00000105135.16	ILVBL	-0.607872	6.04678	61.9344	7.85868e-08	5.91216e-06	584	519	610	617	1318	845	1165	941
ENSG00000105669.14	COPE	-0.608475	6.67314	65.4813	4.95639e-08	4.398e-06	991	831	943	905	2103	1378	1745	1492
ENSG00000140848.17	CPNE2	-0.60862	6.14251	72.3941	2.1267e-08	2.49482e-06	665	611	707	550	1244	1064	1221	1078
ENSG00000242086.8	MUC20-OT1	-0.608795	5.0504	48.2235	5.75401e-07	2.25318e-05	357	355	271	291	663	486	620	557
ENSG00000169710.9	FASN	-0.608802	8.73021	51.4682	3.47265e-07	1.53579e-05	3986	3363	3960	3593	8420	4893	7982	6142
ENSG00000130304.17	SLC27A1	-0.609208	4.504	36.5864	4.39042e-06	0.00010087	199	197	230	191	462	267	407	361
ENSG00000161671.17	EMC10	-0.609503	6.87387	55.0555	2.03918e-07	1.08151e-05	1080	934	1155	1051	2295	1409	2056	1968
ENSG00000273151.1	RP11-449P15.2	-0.609541	5.10269	26.8075	3.45263e-05	0.000486443	407	326	290	275	724	430	658	570
ENSG00000166851.15	PLK1	-0.60968	6.24848	77.9753	1.1232e-08	1.75683e-06	699	653	736	622	1354	981	1450	1176
ENSG00000140688.17	RUSF1	-0.609757	6.85446	94.641	2.02981e-09	7.2981e-07	1102	974	1047	1054	2210	1557	2132	1753
ENSG00000142733.17	MAP3K6	-0.60992	5.06605	63.3467	6.5257e-08	5.26717e-06	308	275	316	266	540	470	593	520
ENSG00000250251.6	PKD1P6	-0.609943	5.22741	27.9131	2.67838e-05	0.000399951	394	291	369	327	719	421	761	637
ENSG00000075218.19	GTSE1	-0.609962	4.53215	39.117	2.72938e-06	7.03566e-05	190	197	265	215	390	339	463	389
ENSG00000267534.4	S1PR2	-0.609974	4.94656	59.2351	1.13127e-07	7.27305e-06	289	271	321	262	623	432	574	463
ENSG00000107829.15	FBXW4	-0.610634	4.20694	28.2174	2.50019e-05	0.000378433	176	145	170	175	355	225	303	334
ENSG00000159363.19	ATP13A2	-0.610886	4.99541	36.4576	4.50042e-06	0.00010221	305	251	312	276	635	374	615	480
ENSG00000126254.12	RBM42	-0.611429	6.05617	59.7096	1.06015e-07	7.00484e-06	615	506	602	636	1311	855	1195	972
ENSG00000197976.12	AKAP17A	-0.611948	5.73143	60.8897	9.03563e-08	6.34902e-06	537	457	481	488	1058	708	974	860
ENSG00000197976.12	PAR_Y_AKAP17A	-0.611948	5.73143	60.8897	9.03563e-08	6.34902e-06	537	457	481	488	1058	708	974	860
ENSG00000142949.17	PTPRF	-0.612458	8.82518	79.4527	9.54323e-09	1.57017e-06	4147	3722	4437	4117	8669	5683	8699	7150
ENSG00000180900.20	SCRIB	-0.612524	7.65514	54.7868	2.12025e-07	1.11173e-05	1957	1606	1852	1807	4074	2404	3819	3023
ENSG00000141756.19	FKBP10	-0.612872	7.875	78.9349	1.01013e-08	1.61649e-06	2202	1972	2224	2150	4587	2986	4289	3836
ENSG00000167123.19	CERCAM	-0.612918	5.16582	43.7124	1.21009e-06	3.90459e-05	302	287	394	326	666	497	696	541
ENSG00000280789.2	PAGR1	-0.612949	4.82954	41.3194	1.83427e-06	5.24606e-05	209	243	287	247	518	328	520	444
ENSG00000164638.11	SLC29A4	-0.61333	4.85317	26.4258	3.77424e-05	0.000522431	241	238	277	252	587	279	546	449
ENSG00000143624.14	INTS3	-0.613508	7.04737	91.0934	2.85881e-09	8.55035e-07	1372	1213	1197	1110	2331	1892	2532	2199
ENSG00000116691.11	MIIP	-0.613538	5.05346	39.9041	2.36402e-06	6.32348e-05	306	242	315	308	675	436	547	491
ENSG00000104897.10	SF3A2	-0.613647	6.71433	73.9615	1.77091e-08	2.21111e-06	945	872	1004	934	2036	1314	2016	1550
ENSG00000006118.15	TMEM132A	-0.613778	6.70379	49.5586	4.66118e-07	1.90613e-05	980	905	959	851	2096	1204	1962	1555
ENSG00000141971.13	MVB12A	-0.614059	4.41605	27.9527	2.6544e-05	0.000396585	145	180	230	205	414	251	397	335
ENSG00000160633.13	SAFB	-0.615739	7.40721	127.078	1.34178e-10	2.47647e-07	1656	1656	1503	1480	3124	2510	3197	2709
ENSG00000182979.18	MTA1	-0.616172	6.92884	82.3332	6.9934e-09	1.35393e-06	1141	978	1179	1146	2290	1617	2304	1963
ENSG00000167371.21	PRRT2	-0.616201	5.6911	39.0936	2.74114e-06	7.05939e-05	452	456	490	439	912	574	1026	873
ENSG00000041988.15	THAP3	-0.616406	4.14487	41.926	1.64822e-06	4.82011e-05	150	148	166	163	353	222	313	266
ENSG00000222012.1	AC005481.5	-0.616443	3.5293	23.78	7.14791e-05	0.000860765	100	109	116	90	182	165	225	188
ENSG00000183010.17	PYCR1	-0.616885	6.20134	73.342	1.90311e-08	2.30077e-06	690	644	661	685	1482	963	1407	1093
ENSG00000005448.17	WDR54	-0.617123	5.26344	47.1079	6.8831e-07	2.56472e-05	322	309	394	352	702	473	688	666
ENSG00000179632.10	MAF1	-0.617402	5.59372	49.1771	4.94833e-07	2.01167e-05	466	378	459	400	963	582	845	749
ENSG00000207955.5	RP11-339B21.12	-0.617622	4.92224	33.6011	7.91179e-06	0.000157708	276	253	242	282	577	379	618	376
ENSG00000162585.17	FAAP20	-0.618145	4.68975	25.5029	4.69586e-05	0.000618776	232	186	264	220	518	282	509	362
ENSG00000131669.10	NINJ1	-0.618345	4.53932	41.4495	1.79251e-06	5.15323e-05	204	180	205	211	463	277	388	347
ENSG00000118257.17	NRP2	-0.619007	6.36975	79.6934	9.2954e-09	1.54946e-06	788	838	767	742	1568	1166	1473	1540
ENSG00000165752.17	STK32C	-0.619143	4.02348	31.9357	1.11492e-05	0.000205367	165	123	141	137	274	204	302	262
ENSG00000104976.12	SNAPC2	-0.619184	4.2542	30.3549	1.5601e-05	0.000264654	167	138	202	149	360	232	344	274
ENSG00000225151.10	GOLGA2P7	-0.619996	7.72376	80.7687	8.2707e-09	1.46473e-06	1885	1785	2010	1958	4071	2631	4026	3387
ENSG00000099864.18	PALM	-0.620039	6.28286	60.7879	9.16032e-08	6.39263e-06	684	622	770	663	1510	932	1476	1150
ENSG00000148985.20	PGAP2	-0.620392	4.82467	56.6032	1.63336e-07	9.34287e-06	276	262	234	251	514	394	514	460
ENSG00000110237.5	ARHGEF17	-0.620494	5.9593	45.8525	8.4509e-07	3.01111e-05	600	501	588	548	1186	729	1238	989
ENSG00000104936.20	DMPK	-0.621069	5.89322	26.6712	3.56391e-05	0.000498318	607	464	524	537	1256	597	1105	1001
ENSG00000110171.20	TRIM3	-0.621652	4.63362	37.2075	3.89934e-06	9.17971e-05	263	221	219	227	549	327	435	407
ENSG00000124766.7	SOX4	-0.621699	6.91477	42.09	1.60152e-06	4.70182e-05	1170	1054	1154	1099	2385	1330	2486	2107
ENSG00000106404.14	CLDN15	-0.622124	3.00998	23.5384	7.59189e-05	0.000903969	79	69	65	76	152	99	150	133
ENSG00000104332.12	SFRP1	-0.622408	5.68861	52.8849	2.80542e-07	1.34607e-05	456	417	525	512	893	717	990	915
ENSG00000126768.12	TIMM17B	-0.622719	5.87691	58.9513	1.17627e-07	7.45197e-06	540	459	535	520	1153	749	1007	887
ENSG00000111676.15	ATN1	-0.623166	8.01258	35.7362	5.17539e-06	0.000113444	2612	2082	2361	2266	5251	2770	5065	4261
ENSG00000166507.19	NDST2	-0.623524	4.40833	31.7582	1.15719e-05	0.000210974	171	176	228	189	394	272	421	326
ENSG00000118046.16	STK11	-0.623786	5.50757	43.6176	1.22982e-06	3.95007e-05	391	369	415	422	958	527	813	667
ENSG00000117245.13	KIF17	-0.624151	3.26821	28.5494	2.3204e-05	0.000359729	71	78	96	83	164	129	171	141
ENSG00000197043.14	ANXA6	-0.624741	5.86696	44.2723	1.10033e-06	3.66138e-05	509	464	629	510	1038	781	965	1096
ENSG00000167671.12	UBXN6	-0.625235	5.71239	54.6704	2.15645e-07	1.1201e-05	428	394	483	514	990	654	882	837
ENSG00000131653.13	TRAF7	-0.625541	5.70639	72.7409	2.04174e-08	2.42599e-06	468	462	529	431	1002	681	1004	813
ENSG00000110011.13	DNAJC4	-0.626055	5.60247	69.4664	3.0191e-08	3.22718e-06	445	403	436	432	905	622	835	809
ENSG00000116649.10	SRM	-0.626255	5.63433	63.3772	6.49975e-08	5.26157e-06	462	379	497	428	960	710	889	708
ENSG00000161558.11	TMEM143	-0.626326	3.84239	38.4645	3.07917e-06	7.67298e-05	132	107	142	136	263	209	262	221
ENSG00000122863.6	CHST3	-0.626467	6.89977	104.706	8.1125e-10	4.31913e-07	1139	1019	1191	1008	2196	1741	2142	1956
ENSG00000130733.11	YIPF2	-0.626886	5.08828	55.1221	2.01959e-07	1.08151e-05	307	276	340	292	670	435	621	526
ENSG00000149599.16	DUSP15	-0.62722	6.51571	83.7467	6.02301e-09	1.26777e-06	764	734	900	814	1637	1251	1687	1369
ENSG00000114646.10	CSPG5	-0.627608	4.7922	31.9838	1.10376e-05	0.000203989	251	244	290	207	514	320	495	506
ENSG00000142330.20	CAPN10	-0.62768	5.06067	36.2363	4.6967e-06	0.000105116	292	292	299	317	684	369	676	509
ENSG00000172725.14	CORO1B	-0.628748	6.02428	54.1798	2.31665e-07	1.18115e-05	566	487	607	615	1281	850	1170	927
ENSG00000116337.20	AMPD2	-0.628873	6.30996	44.194	1.11501e-06	3.68366e-05	840	641	741	692	1702	961	1514	1255
ENSG00000104805.16	NUCB1	-0.629388	6.92806	64.8658	5.36171e-08	4.69744e-06	1181	913	1183	1056	2322	1656	2097	1950
ENSG00000183655.13	KLHL25	-0.629523	4.86679	34.4392	6.68429e-06	0.000138307	243	250	304	232	600	334	528	452
ENSG00000110697.13	PITPNM1	-0.629841	5.58086	40.9729	1.95075e-06	5.52214e-05	453	387	455	383	937	543	902	744
ENSG00000100075.10	SLC25A1	-0.629848	5.89415	58.9783	1.17191e-07	7.44135e-06	487	454	541	552	1153	723	1012	892
ENSG00000142156.16	COL6A1	-0.630421	8.22117	76.2077	1.36939e-08	1.9051e-06	2725	2409	2872	2498	5847	3664	5580	4484
ENSG00000157353.17	FCSK	-0.630461	3.96003	26.4078	3.79019e-05	0.000523872	147	145	133	122	300	173	292	253
ENSG00000160447.7	PKN3	-0.630621	3.30032	26.8617	3.4094e-05	0.000482069	93	66	82	85	178	123	170	135
ENSG00000130726.12	TRIM28	-0.630694	9.13111	117.848	2.72095e-10	3.01317e-07	4999	4590	5392	5003	10798	7744	10242	8341
ENSG00000160211.19	G6PD	-0.630823	4.82826	62.9117	6.90788e-08	5.498e-06	260	228	268	235	485	374	507	469
ENSG00000164463.12	CREBRF	-0.630893	3.80204	40.4139	2.15606e-06	5.94528e-05	134	133	125	121	263	213	248	225
ENSG00000189343.7	RPS2P46	-0.631081	7.6539	66.9852	4.09984e-08	3.80475e-06	1705	1540	1783	1804	3937	2613	3288	2861
ENSG00000105426.17	PTPRS	-0.631216	8.28493	63.9305	6.04864e-08	5.07444e-06	2815	2579	2812	2703	5961	3528	5979	4904
ENSG00000182858.14	ALG12	-0.631298	3.93506	32.0073	1.09835e-05	0.00020326	129	146	147	122	298	173	296	246
ENSG00000114631.11	PODXL2	-0.631372	6.99371	52	3.20382e-07	1.44931e-05	1139	969	1280	1161	2440	1489	2376	2164
ENSG00000186635.15	ARAP1	-0.63243	3.92633	36.9812	4.07094e-06	9.47093e-05	146	114	125	130	287	191	268	213
ENSG00000185122.11	HSF1	-0.632723	6.97719	94.8723	1.98573e-09	7.23356e-07	1122	1001	1171	1133	2406	1642	2228	1958
ENSG00000162522.11	KIAA1522	-0.632756	6.72574	79.9372	9.05147e-09	1.54251e-06	1027	866	944	986	2053	1388	1991	1689
ENSG00000140464.20	PML	-0.632946	5.20467	53.2605	2.65298e-07	1.29766e-05	326	292	369	329	726	485	616	615
ENSG00000169592.15	INO80E	-0.633373	5.30168	53.678	2.49407e-07	1.23521e-05	337	308	373	387	757	526	760	576
ENSG00000126012.12	KDM5C	-0.634447	7.43609	98.6811	1.39173e-09	5.9277e-07	1629	1509	1627	1519	3432	2294	3121	2851
ENSG00000173898.15	SPTBN2	-0.635766	6.61835	33.646	7.84008e-06	0.000156604	921	797	852	1027	1964	1127	2045	1614
ENSG00000185504.17	FAAP100	-0.636015	4.96009	35.6885	5.22371e-06	0.000114082	264	257	314	246	622	335	568	496
ENSG00000197562.10	RAB40C	-0.636559	4.28432	33.136	8.69773e-06	0.000170295	183	139	187	162	379	220	359	297
ENSG00000189077.11	TMEM120A	-0.636692	5.33917	67.9981	3.61467e-08	3.53903e-06	408	320	385	322	744	580	729	617
ENSG00000101670.12	LIPG	-0.636809	6.07065	85.2351	5.1576e-09	1.17784e-06	603	610	660	636	1262	971	1349	1093
ENSG00000141068.14	KSR1	-0.636872	5.92014	56.1986	1.73017e-07	9.73574e-06	600	504	559	560	1240	759	1078	1070
ENSG00000250571.7	GLI4	-0.637486	3.33068	23.4021	7.85557e-05	0.000927427	85	85	104	82	217	121	191	138
ENSG00000105696.9	TMEM59L	-0.638367	4.57361	31.3904	1.25045e-05	0.000223059	248	198	194	208	464	259	460	406
ENSG00000087076.9	HSD17B14	-0.639195	4.21154	40.0707	2.29375e-06	6.19537e-05	161	154	186	168	315	252	357	322
ENSG00000149823.9	VPS51	-0.639569	6.34122	58.1854	1.30781e-07	8.06388e-06	699	618	778	741	1646	991	1492	1191
ENSG00000108479.13	GALK1	-0.639739	3.19549	24.4838	6.00858e-05	0.000753288	79	68	81	80	173	124	161	118
ENSG00000104964.15	TLE5	-0.640303	7.06986	52.5789	2.9367e-07	1.37672e-05	1267	1039	1273	1248	2665	1586	2496	2301
ENSG00000109501.15	WFS1	-0.640513	4.87244	51.5042	3.4537e-07	1.52985e-05	265	239	282	256	590	357	559	448
ENSG00000187091.14	PLCD1	-0.641493	7.72173	118.163	2.6541e-10	3.01317e-07	1870	1769	2003	1774	4005	2993	3686	3163
ENSG00000149091.15	DGKZ	-0.642443	5.15485	52.1027	3.15453e-07	1.42935e-05	323	296	352	302	690	420	686	592
ENSG00000148362.11	PAXX	-0.643431	4.19465	36.4016	4.54928e-06	0.000102807	161	125	176	177	342	231	320	303
ENSG00000063245.15	EPN1	-0.643572	6.62601	51.3441	3.53888e-07	1.55071e-05	935	769	943	848	2096	1174	1813	1498
ENSG00000160256.13	FAM207A	-0.643662	3.33983	26.8677	3.4047e-05	0.000481651	96	78	99	83	204	145	170	147
ENSG00000170265.12	ZNF282	-0.643699	5.08961	65.9115	4.69298e-08	4.25466e-06	286	295	327	314	671	464	634	521
ENSG00000101460.13	MAP1LC3A	-0.644487	3.6941	23.1848	8.29703e-05	0.000968756	120	106	117	100	234	131	270	200
ENSG00000139438.6	FAM222A	-0.644668	4.56553	40.2367	2.22599e-06	6.07094e-05	213	191	213	192	480	262	429	352
ENSG00000140553.18	UNC45A	-0.645638	5.82755	64.6668	5.50038e-08	4.72838e-06	540	452	569	504	1087	732	1084	972
ENSG00000102096.9	PIM2	-0.64575	4.01273	38.8481	2.86795e-06	7.29771e-05	120	162	144	131	278	218	292	254
ENSG00000184349.14	EFNA5	-0.645752	4.68763	33.4464	8.16417e-06	0.000161447	264	283	173	222	478	363	509	417
ENSG00000137171.15	KLC4	-0.646069	5.32999	35.9703	4.94494e-06	0.000109345	444	331	316	356	853	528	674	662
ENSG00000171222.11	SCAND1	-0.646605	4.96208	35.667	5.24575e-06	0.000114263	278	229	257	278	651	335	535	446
ENSG00000090013.11	BLVRB	-0.646811	4.81519	35.567	5.3492e-06	0.000115969	292	183	254	258	554	370	472	456
ENSG00000106009.16	BRAT1	-0.646996	5.86603	54.1005	2.34374e-07	1.19058e-05	513	467	556	554	1228	712	1081	918
ENSG00000083444.17	PLOD1	-0.647079	5.79841	38.7352	2.92844e-06	7.38378e-05	501	419	583	433	964	694	1024	947
ENSG00000186577.14	SMIM29	-0.647252	4.21488	30.501	1.51176e-05	0.000258193	199	136	144	175	375	252	328	275
ENSG00000167578.18	RAB4B	-0.647253	4.04285	35.9363	4.97771e-06	0.000109895	150	116	159	134	321	228	255	243
ENSG00000132740.10	IGHMBP2	-0.64729	4.46277	54.3784	2.25031e-07	1.15584e-05	197	179	195	196	415	292	385	347
ENSG00000082684.16	SEMA5B	-0.647622	7.96076	82.9218	6.57005e-09	1.31721e-06	2190	2170	2286	2247	4870	3035	4894	3978
ENSG00000133612.19	AGAP3	-0.64763	5.44927	44.6729	1.0285e-06	3.49805e-05	403	328	446	385	912	532	831	671
ENSG00000197150.13	ABCB8	-0.648026	4.19298	43.0364	1.3588e-06	4.21072e-05	155	161	162	157	328	213	355	299
ENSG00000178149.17	DALRD3	-0.648552	5.0216	64.5448	5.58738e-08	4.75517e-06	255	274	331	285	589	478	542	531
ENSG00000198816.7	ZNF358	-0.649284	5.20982	30.6479	1.46475e-05	0.000252815	295	281	337	344	774	379	711	520
ENSG00000130511.16	SSBP4	-0.649829	4.79863	32.0762	1.08265e-05	0.000201162	237	234	289	224	542	313	565	439
ENSG00000123384.14	LRP1	-0.64995	8.23899	73.8591	1.79205e-08	2.21486e-06	2918	2459	2820	2666	5997	3740	5799	4975
ENSG00000189171.15	S100A13	-0.650219	5.13863	67.0523	4.06559e-08	3.78976e-06	330	304	331	329	630	528	624	639
ENSG00000183751.15	TBL3	-0.651337	5.51653	47.3389	6.63079e-07	2.4976e-05	425	339	404	402	940	588	777	658
ENSG00000185485.14	SDHAP1	-0.651855	3.9434	39.8828	2.37318e-06	6.34185e-05	137	135	150	146	280	219	322	249
ENSG00000100979.15	PLTP	-0.651915	6.82671	71.227	2.44222e-08	2.7597e-06	1073	955	1113	928	2155	1506	2009	1978
ENSG00000124126.14	PREX1	-0.65205	7.30997	99.6196	1.27726e-09	5.63784e-07	1419	1290	1627	1398	3069	2167	2975	2589
ENSG00000137166.17	FOXP4	-0.65214	7.66627	77.574	1.17453e-08	1.77565e-06	1886	1619	1939	1752	3996	2535	3973	3116
ENSG00000039523.20	RIPOR1	-0.652614	5.86667	51.0096	3.72435e-07	1.61051e-05	579	469	537	486	1168	714	1110	925
ENSG00000011052.21	NME1-NME2	-0.65295	4.88808	30.8475	1.40345e-05	0.000243601	247	278	219	276	554	353	602	424
ENSG00000251322.9	SHANK3	-0.653067	5.14485	41.6786	1.72149e-06	4.97488e-05	354	286	334	300	724	411	709	570
ENSG00000167566.17	NCKAP5L	-0.654062	5.57406	54.5837	2.18387e-07	1.13222e-05	430	371	450	435	997	585	896	717
ENSG00000247596.10	TWF2	-0.654127	4.73218	56.9178	1.56217e-07	9.04782e-06	248	217	229	227	515	348	466	409
ENSG00000148204.12	CRB2	-0.654499	6.945	57.7159	1.39633e-07	8.38557e-06	958	886	1241	981	2188	1517	2293	1696
ENSG00000254681.6	PKD1P5	-0.654677	4.98745	24.1765	6.47964e-05	0.000798345	311	249	288	268	744	332	572	475
ENSG00000076201.16	PTPN23	-0.654696	6.70761	62.1608	7.62636e-08	5.83248e-06	1023	827	952	967	2167	1324	1987	1665
ENSG00000139636.16	LMBR1L	-0.654951	6.05157	106.267	7.0837e-10	4.04355e-07	620	565	621	577	1237	977	1244	1033
ENSG00000227398.4	KIF9-AS1	-0.655418	2.68809	24.1002	6.60282e-05	0.000810999	51	60	59	60	119	103	117	94
ENSG00000116852.15	KIF21B	-0.655471	5.96563	36.444	4.51221e-06	0.000102394	559	514	571	616	1256	687	1241	1105
ENSG00000067836.13	ROGDI	-0.656049	4.56187	44.335	1.08875e-06	3.64939e-05	197	180	229	208	442	287	458	355
ENSG00000131899.11	LLGL1	-0.656167	7.18916	79.4129	9.58491e-09	1.57017e-06	1243	1167	1379	1318	2804	1784	2799	2296
ENSG00000184232.9	OAF	-0.656675	3.25646	23.8435	7.03605e-05	0.000851368	85	92	99	64	175	122	184	161
ENSG00000159069.14	FBXW5	-0.656938	5.50193	46.3336	7.80823e-07	2.83817e-05	414	321	397	407	869	536	790	720
ENSG00000160408.16	ST6GALNAC6	-0.658308	4.27443	30.2736	1.58775e-05	0.000267866	133	132	220	169	316	266	341	309
ENSG00000083807.10	SLC27A5	-0.658393	3.25559	28.3108	2.44812e-05	0.000373423	84	94	84	62	170	135	172	135
ENSG00000141526.18	SLC16A3	-0.658706	5.68642	36.268	4.66796e-06	0.000104642	448	397	491	424	1013	561	966	807
ENSG00000167965.18	MLST8	-0.658963	5.82306	68.8062	3.27245e-08	3.30649e-06	508	427	556	497	1105	730	1041	892
ENSG00000044090.12	CUL7	-0.65942	7.45239	119.226	2.44118e-10	3.01317e-07	1519	1426	1641	1610	3369	2398	3172	2790
ENSG00000102057.10	KCND1	-0.659501	4.16736	26.5949	3.62789e-05	0.000505556	186	174	126	160	362	200	341	324
ENSG00000074181.9	NOTCH3	-0.659831	6.82892	46.0432	8.18954e-07	2.94069e-05	1015	857	1094	1055	2314	1310	2265	1779
ENSG00000104812.15	GYS1	-0.660158	5.06718	68.7433	3.29777e-08	3.31996e-06	269	327	298	260	586	465	632	500
ENSG00000171298.13	GAA	-0.660207	6.03764	46.1051	8.10656e-07	2.91847e-05	546	539	658	546	1270	775	1353	964
ENSG00000112852.7	PCDHB2	-0.660443	4.55795	31.1572	1.3138e-05	0.000231969	199	213	200	221	536	259	413	378
ENSG00000159335.18	PTMS	-0.660908	8.0468	41.26	1.85369e-06	5.28521e-05	2455	2096	2611	2304	5087	2792	5444	4731
ENSG00000106624.11	AEBP1	-0.66161	4.6176	33.764	7.65507e-06	0.000153796	247	178	228	213	484	282	437	441
ENSG00000189410.12	SH2D5	-0.662498	4.09133	35.3039	5.63234e-06	0.000120877	172	132	156	160	346	225	323	284
ENSG00000206503.13	HLA-A	-0.662661	4.47704	28.68	2.25362e-05	0.000351699	182	156	249	179	418	253	401	382
ENSG00000130294.18	KIF1A	-0.664042	8.81971	63.4149	6.46787e-08	5.25807e-06	4525	3660	3984	4047	9450	5513	8508	7487
ENSG00000166965.12	RCCD1	-0.664584	4.22121	43.6056	1.23235e-06	3.95286e-05	187	174	144	163	340	259	355	314
ENSG00000101997.13	CCDC22	-0.665438	4.26158	43.4085	1.27462e-06	4.04212e-05	179	140	178	176	379	254	351	297
ENSG00000167645.17	YIF1B	-0.66598	5.21541	52.8106	2.83671e-07	1.34707e-05	333	312	328	314	778	466	676	537
ENSG00000107404.20	DVL1	-0.666188	5.58593	38.279	3.18734e-06	7.90057e-05	416	365	457	457	969	526	993	760
ENSG00000102302.8	FGD1	-0.66621	4.75712	44.805	1.00595e-06	3.43824e-05	267	222	235	230	554	328	474	461
ENSG00000130822.16	PNCK	-0.667215	6.1064	101.729	1.05569e-09	4.87115e-07	632	573	587	637	1251	983	1305	1082
ENSG00000133243.10	BTBD2	-0.667734	7.03438	87.0874	4.26502e-09	1.09331e-06	1128	1024	1274	1123	2616	1690	2419	1962
ENSG00000112655.16	PTK7	-0.668596	6.90226	109.361	5.44091e-10	3.88017e-07	985	1042	1140	1000	2175	1596	2158	1994
ENSG00000205336.14	ADGRG1	-0.668676	8.15815	108.153	6.02663e-10	3.88017e-07	2590	2342	2731	2413	5532	3837	5181	4648
ENSG00000167680.17	SEMA6B	-0.670029	6.29126	47.985	5.97718e-07	2.30792e-05	685	590	763	638	1612	965	1487	1070
ENSG00000165617.15	DACT1	-0.670113	4.91339	84.5146	5.55829e-09	1.20328e-06	272	250	296	281	573	447	564	507
ENSG00000240184.7	PCDHGC3	-0.670584	6.08739	82.9019	6.58388e-09	1.31721e-06	557	631	621	601	1308	898	1322	1077
ENSG00000275342.5	PRAG1	-0.670796	6.50793	76.8862	1.26854e-08	1.84037e-06	832	776	873	816	1849	1164	1753	1540
ENSG00000213983.12	AP1G2	-0.670881	4.29138	27.5184	2.93046e-05	0.000429513	212	150	172	160	357	215	404	353
ENSG00000125733.18	TRIP10	-0.67142	4.35224	51.6437	3.38131e-07	1.50743e-05	192	163	190	164	370	323	382	276
ENSG00000060642.11	PIGV	-0.671518	3.56985	33.9994	7.30015e-06	0.00014848	97	112	110	92	208	186	228	161
ENSG00000279694.1	RP11-5O23.2	-0.6716	5.22122	28.9299	2.13158e-05	0.000336638	290	209	376	297	569	510	729	433
ENSG00000173264.15	GPR137	-0.671878	3.62134	23.9817	6.79896e-05	0.000830668	115	90	115	93	231	128	256	179
ENSG00000099917.17	MED15	-0.672087	6.32028	83.7926	5.99409e-09	1.26777e-06	723	652	764	692	1629	1057	1506	1229
ENSG00000102996.5	MMP15	-0.673495	5.24799	46.7113	7.34109e-07	2.70977e-05	305	323	401	306	791	464	718	587
ENSG00000107872.14	FBXL15	-0.675027	3.20853	29.5911	1.84213e-05	0.000300881	74	65	83	84	157	117	173	139
ENSG00000188064.10	WNT7B	-0.675079	5.69862	85.5158	5.01014e-09	1.17784e-06	423	456	466	432	981	726	909	780
ENSG00000092051.17	JPH4	-0.675081	4.055	26.3362	3.85439e-05	0.000529835	164	150	143	143	364	174	328	289
ENSG00000099804.9	CDC34	-0.675179	6.44946	80.3021	8.69929e-09	1.4959e-06	797	671	824	766	1720	1107	1649	1393
ENSG00000133315.12	MACROD1	-0.675372	3.15071	26.4489	3.75391e-05	0.000520155	72	64	82	87	177	126	155	126
ENSG00000169635.10	HIC2	-0.675397	7.32526	114.217	3.6404e-10	3.13933e-07	1459	1374	1493	1344	3209	2213	3042	2412
ENSG00000007255.10	TRAPPC6A	-0.676024	4.32908	37.3106	3.82383e-06	9.05583e-05	172	157	153	182	402	231	363	282
ENSG00000228501.2	RPL15P18	-0.676266	3.49996	37.3518	3.79405e-06	9.01615e-05	93	88	104	83	175	162	198	167
ENSG00000013364.19	MVP	-0.67682	4.55835	32.4192	1.0081e-05	0.000191028	219	190	204	203	480	263	414	410
ENSG00000051596.10	THOC3	-0.677199	4.59321	48.2563	5.72401e-07	2.24461e-05	218	191	209	214	471	306	448	373
ENSG00000107719.9	PALD1	-0.677659	3.55819	33.9395	7.38872e-06	0.000149639	96	83	118	105	207	155	218	190
ENSG00000187840.5	EIF4EBP1	-0.678455	5.01419	41.05	1.92416e-06	5.46362e-05	318	246	272	294	675	388	626	491
ENSG00000133247.14	KMT5C	-0.678462	4.11413	27.2692	3.10296e-05	0.000448592	176	143	154	136	348	180	363	285
ENSG00000099795.7	NDUFB7	-0.678503	5.41791	40.4463	2.14356e-06	5.9167e-05	353	296	414	414	839	515	825	666
ENSG00000175182.15	FAM131A	-0.67858	5.26441	60.6475	9.33514e-08	6.46108e-06	353	309	360	306	750	491	722	590
ENSG00000173621.9	LRFN4	-0.678997	5.30527	29.9954	1.68648e-05	0.000280085	328	261	412	329	789	398	744	636
ENSG00000107331.17	ABCA2	-0.679071	5.56741	43.6364	1.22588e-06	3.94635e-05	445	360	473	403	942	562	970	768
ENSG00000100429.18	HDAC10	-0.679844	4.42511	29.4707	1.89145e-05	0.000306765	233	160	178	189	429	240	469	333
ENSG00000184967.7	NOC4L	-0.680741	4.28691	37.3318	3.80843e-06	9.03483e-05	174	154	200	159	423	245	378	280
ENSG00000173020.11	GRK2	-0.680909	6.36434	64.6439	5.51659e-08	4.72838e-06	740	658	794	744	1687	993	1643	1347
ENSG00000156521.14	TYSND1	-0.681527	4.45814	48.8563	5.20466e-07	2.09435e-05	198	171	198	197	405	307	448	312
ENSG00000108963.19	DPH1	-0.682579	5.14289	45.9499	8.31636e-07	2.97466e-05	302	258	340	340	708	422	657	604
ENSG00000183506.17	PI4KAP2	-0.683284	7.10726	74.2519	1.71243e-08	2.18314e-06	1368	1155	1180	1252	2764	1796	2625	2373
ENSG00000179242.16	CDH4	-0.683913	4.49127	27.733	2.79036e-05	0.000413108	216	173	221	204	441	237	443	450
ENSG00000100241.21	SBF1	-0.684504	7.98227	75.3198	1.5148e-08	1.99998e-06	2393	2009	2281	2300	5266	3139	4976	4028
ENSG00000119688.21	ABCD4	-0.68468	6.48478	101.838	1.04549e-09	4.87115e-07	872	828	764	787	1806	1252	1698	1510
ENSG00000014164.7	ZC3H3	-0.684819	5.08	40.2237	2.23122e-06	6.07094e-05	312	248	322	306	753	408	642	500
ENSG00000162783.11	IER5	-0.685084	4.82534	53.0548	2.7353e-07	1.3239e-05	273	249	259	222	519	349	543	521
ENSG00000132819.17	RBM38	-0.685222	5.69025	55.0935	2.028e-07	1.08151e-05	473	367	448	492	1023	651	937	828
ENSG00000170604.5	IRF2BP1	-0.685282	5.06285	34.5393	6.55209e-06	0.000136269	284	246	305	305	736	352	623	503
ENSG00000160360.13	GPSM1	-0.686962	5.72317	49.7555	4.52021e-07	1.86255e-05	485	404	460	516	1077	661	1017	858
ENSG00000128185.10	DGCR6L	-0.687316	4.2134	35.8838	5.02878e-06	0.000110934	185	132	166	152	368	227	307	323
ENSG00000104885.18	DOT1L	-0.687556	7.25294	36.3133	4.62736e-06	0.000104114	1490	1167	1366	1355	3102	1595	3207	2576
ENSG00000108819.11	PPP1R9B	-0.687626	5.5126	89.2785	3.42064e-09	9.57421e-07	403	396	420	383	939	618	848	693
ENSG00000076928.18	ARHGEF1	-0.688346	3.90764	24.4546	6.05173e-05	0.000756577	152	134	143	100	319	170	301	237
ENSG00000181409.14	AATK	-0.68907	3.92434	27.1487	3.19031e-05	0.000457874	139	149	129	123	334	172	289	253
ENSG00000125967.17	NECAB3	-0.689283	4.6398	55.1682	2.00617e-07	1.08151e-05	211	213	207	217	474	292	452	423
ENSG00000015532.10	XYLT2	-0.69026	3.83197	46.4417	7.67133e-07	2.80186e-05	128	119	126	129	261	184	278	248
ENSG00000255248.9	MIR100HG	-0.691163	5.33299	51.1567	3.64151e-07	1.58221e-05	401	407	371	399	863	601	781	802
ENSG00000143369.15	ECM1	-0.691999	3.74417	40.7842	2.01757e-06	5.65348e-05	121	106	132	120	264	186	252	225
ENSG00000103152.12	MPG	-0.692065	4.25478	52.8705	2.81147e-07	1.34623e-05	170	156	158	160	358	279	367	245
ENSG00000100304.13	TTLL12	-0.69325	5.17506	57.7337	1.39286e-07	8.3829e-06	326	313	317	286	750	435	705	530
ENSG00000105520.10	PLPPR2	-0.693444	3.53619	28.5618	2.31398e-05	0.000359499	106	87	118	87	213	133	230	197
ENSG00000108679.13	LGALS3BP	-0.694109	5.16765	23.083	8.51317e-05	0.000989036	358	269	333	293	739	331	677	695
ENSG00000163050.18	COQ8A	-0.694172	4.59074	55.2668	1.97779e-07	1.07153e-05	225	199	214	203	475	313	436	407
ENSG00000170638.10	TRABD	-0.694891	3.76197	31.99	1.10232e-05	0.000203859	113	102	123	122	265	153	262	216
ENSG00000169660.17	HEXD	-0.695731	3.44987	32.8079	9.30326e-06	0.00017936	99	90	86	102	221	130	203	180
ENSG00000138623.10	SEMA7A	-0.696182	3.9362	27.0136	3.2915e-05	0.000469476	147	132	113	138	327	164	290	254
ENSG00000164077.14	MON1A	-0.696318	3.47485	43.3606	1.28513e-06	4.07081e-05	93	101	91	97	211	170	203	157
ENSG00000109736.15	MFSD10	-0.696518	5.25075	34.0599	7.21193e-06	0.000147352	327	309	337	344	822	387	780	593
ENSG00000278558.5	TMEM191B	-0.696593	5.17999	40.4733	2.13319e-06	5.90106e-05	295	298	326	347	749	480	736	507
ENSG00000161277.11	THAP8	-0.696775	3.13062	30.2062	1.6111e-05	0.000271144	59	74	86	60	140	121	151	128
ENSG00000274602.5	PI4KAP1	-0.696865	7.68626	71.9647	2.23729e-08	2.59161e-06	2019	1840	1758	1758	4354	2729	3822	3458
ENSG00000103507.14	BCKDK	-0.696947	4.68235	42.4534	1.50312e-06	4.50367e-05	236	187	235	195	460	315	513	375
ENSG00000172037.14	LAMB2	-0.697139	6.3145	53.8715	2.42397e-07	1.21352e-05	722	582	805	640	1556	973	1411	1402
ENSG00000114270.18	COL7A1	-0.69716	4.26665	31.5324	1.21351e-05	0.000217731	195	171	144	142	406	229	355	283
ENSG00000171163.16	ZNF692	-0.697707	4.94633	52.2766	3.073e-07	1.40854e-05	331	263	260	267	604	431	625	522
ENSG00000258559.2	AC005519.4	-0.697931	3.3766	36.7861	4.22553e-06	9.75678e-05	96	103	79	97	194	155	193	185
ENSG00000101134.12	DOK5	-0.698453	3.22415	32.2515	1.04382e-05	0.000196053	90	79	87	76	157	137	177	172
ENSG00000171159.5	C9orf16	-0.69874	5.46255	55.4164	1.93557e-07	1.05693e-05	398	361	392	371	884	496	837	755
ENSG00000006015.18	REX1BD	-0.698819	4.19575	33.9964	7.30465e-06	0.00014848	149	129	191	145	355	207	345	291
ENSG00000261236.8	BOP1	-0.698964	5.0508	52.5995	2.92769e-07	1.37611e-05	255	259	305	325	680	425	609	517
ENSG00000261221.4	ZNF865	-0.699561	4.55119	36.669	4.32137e-06	9.96147e-05	195	224	198	207	491	254	466	401
ENSG00000104081.14	BMF	-0.700798	4.84077	23.8161	7.08416e-05	0.000856584	279	247	308	164	541	324	500	574
ENSG00000187678.10	SPRY4	-0.701744	6.57209	84.5059	5.56332e-09	1.20328e-06	1006	918	808	782	1906	1403	1827	1704
ENSG00000106948.17	AKNA	-0.701761	5.55534	61.9812	7.81005e-08	5.8931e-06	466	422	379	422	968	688	987	664
ENSG00000130005.13	GAMT	-0.702054	3.55736	31.1608	1.31281e-05	0.00023194	89	89	111	122	225	170	222	184
ENSG00000087116.16	ADAMTS2	-0.702676	3.21571	24.7381	5.64715e-05	0.000717491	88	66	94	81	192	117	167	166
ENSG00000103326.12	CAPN15	-0.702871	4.98491	25.5054	4.69304e-05	0.000618699	303	206	299	292	702	344	646	474
ENSG00000162512.16	SDC3	-0.703893	8.32279	81.1783	7.91334e-09	1.44132e-06	2924	2574	3113	2653	6513	4000	5934	5584
ENSG00000100401.20	RANGAP1	-0.704201	5.86638	83.5639	6.13982e-09	1.26777e-06	493	465	539	535	1167	742	1115	954
ENSG00000130529.16	TRPM4	-0.70443	7.19728	94.3763	2.08158e-09	7.33842e-07	1241	1106	1371	1244	2893	1920	2653	2243
ENSG00000250067.12	YJEFN3	-0.705002	4.99118	54.4413	2.22972e-07	1.14739e-05	330	282	266	264	638	429	707	470
ENSG00000268858.2	RP4-591C20.9	-0.705022	2.82852	23.4695	7.724e-05	0.000914232	60	63	70	60	132	93	140	129
ENSG00000160284.15	SPATC1L	-0.705086	4.01758	39.9928	2.32634e-06	6.27116e-05	154	118	149	141	348	209	284	259
ENSG00000100968.14	NFATC4	-0.70662	5.66501	74.1788	1.72695e-08	2.18314e-06	456	425	452	408	1006	655	950	801
ENSG00000049089.15	COL9A2	-0.706944	3.29229	29.633	1.82529e-05	0.000298818	84	89	81	81	199	111	209	141
ENSG00000125618.18	PAX8	-0.70698	5.88322	34.0555	7.21824e-06	0.000147372	615	489	455	550	1249	652	1152	1096
ENSG00000105738.11	SIPA1L3	-0.707593	5.61928	59.937	1.02781e-07	6.87318e-06	478	423	434	422	1060	600	975	821
ENSG00000167513.9	CDT1	-0.708267	5.3452	60.8965	9.0274e-08	6.34902e-06	362	284	354	352	818	515	737	587
ENSG00000139517.9	LNX2	-0.708332	3.14613	28.398	2.4006e-05	0.000367914	76	87	72	65	167	108	166	147
ENSG00000167543.16	TP53I13	-0.708517	5.13174	63.708	6.22578e-08	5.1605e-06	287	270	321	307	705	445	664	515
ENSG00000108106.14	UBE2S	-0.708908	7.27748	77.5419	1.17874e-08	1.77565e-06	1315	1232	1420	1356	3268	1892	2963	2367
ENSG00000181029.9	TRAPPC5	-0.708944	4.41406	50.1079	4.27928e-07	1.78153e-05	186	154	203	202	415	290	403	352
ENSG00000177105.10	RHOG	-0.708954	3.61066	40.881	1.98299e-06	5.58486e-05	108	103	112	97	259	187	216	161
ENSG00000185049.16	NELFA	-0.709105	6.27533	115.068	3.39806e-10	3.13933e-07	725	638	689	666	1564	1079	1458	1231
ENSG00000095906.17	NUBP2	-0.709476	5.88529	52.235	3.09229e-07	1.41281e-05	495	456	509	537	1306	684	1041	905
ENSG00000137285.11	TUBB2B	-0.709598	10.7909	113.554	3.84253e-10	3.13933e-07	14859	13356	16945	15157	34268	23834	33149	27188
ENSG00000167280.17	ENGASE	-0.709839	5.58817	57.9384	1.35359e-07	8.21091e-06	476	382	393	434	982	622	980	737
ENSG00000125826.21	RBCK1	-0.711242	5.96592	103.796	8.78702e-10	4.50498e-07	585	493	544	549	1188	864	1160	1046
ENSG00000105655.19	ISYNA1	-0.711322	6.71467	50.7055	3.90218e-07	1.65439e-05	978	753	1035	919	2137	1226	2087	1817
ENSG00000117399.14	CDC20	-0.711962	6.66607	136.291	6.91471e-11	2.05203e-07	879	840	877	877	1904	1371	1899	1646
ENSG00000204498.11	NFKBIL1	-0.712862	4.91388	77.1848	1.22675e-08	1.81618e-06	257	252	262	262	571	401	577	482
ENSG00000205978.6	NYNRIN	-0.713099	3.49385	24.8218	5.53339e-05	0.000706495	105	103	108	83	223	117	227	219
ENSG00000130669.17	PAK4	-0.71366	5.49876	65.8102	4.75357e-08	4.2813e-06	387	360	430	344	920	542	832	705
ENSG00000141959.17	PFKL	-0.714934	6.4354	48.7624	5.28245e-07	2.11642e-05	743	594	851	765	1775	1030	1645	1387
ENSG00000101665.10	SMAD7	-0.715153	3.27821	29.2183	1.99964e-05	0.000319816	77	83	101	70	169	116	192	174
ENSG00000170382.12	LRRN2	-0.716942	5.0808	52.4627	2.9883e-07	1.3848e-05	295	248	310	284	675	382	631	560
ENSG00000087245.13	MMP2	-0.717212	7.25838	113.941	3.72298e-10	3.13933e-07	1394	1176	1395	1330	2846	2184	2802	2580
ENSG00000071894.17	CPSF1	-0.718194	7.09671	88.4522	3.71546e-09	9.89063e-07	1210	1024	1256	1206	2761	1726	2636	2175
ENSG00000126351.13	THRA	-0.718262	5.16613	39.8543	2.38548e-06	6.3638e-05	348	267	327	297	703	404	657	682
ENSG00000167642.13	SPINT2	-0.718384	4.28368	32.4555	1.00054e-05	0.000189856	185	138	174	195	344	255	358	403
ENSG00000168010.11	ATG16L2	-0.718978	4.38143	51.9601	3.22317e-07	1.45101e-05	182	167	186	178	359	277	407	362
[truncated: 391 more rows]

## Sheet: IPA_Canonical
Ingenuity Canonical Pathways	-log(p-value)	Ratio	z-score	Molecules
RHOGDI Signaling	2.49	0.155	2.353	ARHGAP12,ARHGAP4,ARHGAP5,ARHGEF1,ARHGEF17,ARHGEF18,ARHGEF2,CDH20,CDH24,CDH4,DGKZ,GNA11,GNAI2,GNB2,ITGA3,ITGB5,LIMK1,MSN,MYH3,MYH7B,MYL12A,MYL6B,MYO18A,PAK4,PI4KA,PPP1R12C,RAC3,RHOC,RHOG,RHOT2,RND3,ROCK1,ROCK2,SRC
PTEN Signaling	2.36	0.166	2.294	AKT1,AKT2,BCAR1,CASP3,CCND1,CDKN1A,CDKN1B,CHUK,CSNK2B,FGFR1,FLT4,GSK3A,HRAS,IGF1R,ILK,INPP5D,INPPL1,ITGA3,ITGB5,MAP2K2,MAST2,NGFR,RAC3,RASD2,RPS6KB2
Cell Cycle Regulation by BTG Family Proteins	2.63	0.263	2	CCND1,CCNE1,CCNE2,E2F6,PPP2R1A,PPP2R1B,PPP2R3A,PPP2R3B,PPP2R5D,PRMT1
Coronavirus Pathogenesis Pathway	5.11	0.196	1.761	ABL1,ATP6AP1,BAX,CASP3,CCDC22,CCND1,CCNE1,CCNE2,CHUK,E2F6,EEF1A2,EIF2AK3,FAU,HDAC10,HDAC11,HDAC5,HDAC6,HDAC7,MAPK11,MAPK12,NFKBIB,PTGES2,RBL1,RIPK1,RNU1-1,RPS10,RPS14,RPS15,RPS16,RPS19,RPS2,RPS21,RPS28,RPS3,RPS5,RPS9,RPSA,TNPO2,TYK2,ZC3HAV1
[truncated: 116 more rows]

## Sheet: IPA USRs
Upstream Regulator	Expr Log Ratio	Molecule Type	Predicted Activation State	Activation z-score	Flags	p-value of overlap	Target Molecules in Dataset	Mechanistic Network
[truncated: 803 more rows]

[truncated: 3 more sheets: IPA Dis&Funct, OrigvsUninfected_ALL, TPM]
